# Supplementary material for: A Family of Chemoreceptors in Tribolium castaneum (Tenebrionidae: Coleoptera)
Source: PubMed Central journal article supplement (PMC2121604; doi:10.1371/journal.pone.0001319), 2007-12-19
Supplement: pone.0001319.s001.pdf [file pone.0001319.s001.pdf]

**Table S1.** Nucleotide sequences (5-3') of the primers that were used in this study.**(A)**

| Target gene       | Forward primer name | Forward primer sequence (5'-3') | Reverse primer name | Reverse primer sequence (5'-3') | Accession number |
|-------------------|---------------------|---------------------------------|---------------------|---------------------------------|------------------|
| <i>Tcas</i> GR1   | F1                  | ATGCAACACGAAGTCGTC              | R1                  | TTAACCAAACTTACCGAAA             | AM292322         |
| <i>Tcas</i> GR2   | F2                  | ATGGAAAAGTCGACGAAA              | R2                  | TTAAGCGCAGGTTAAACTG             | AM292323         |
| <i>Tcas</i> GR3   | F3                  | ATGTACCACCAAGACCAAGC            | R3                  | TTAGTTGGGTGTTTGCGTAGTG          | AM292359         |
| <i>Tcas</i> GR4   | F4                  | ATGGTTCGGCCAGAGCTTGAC           | R4                  | TCATATCGAAAAGTTTTGTG            | AM292325         |
| <i>Tcas</i> GR5   | F5                  | ATGACAATACAGTTGTTG              | R5                  | TTAACTGGTCAAGTTTTCAA            | AM292326         |
| <i>Tcas</i> GR6   | F6                  | ATGGAAATAAGCGACTTGG             | R6                  | TTATCCCCGCATATTGAGTA            | AM292327         |
| <i>Tcas</i> GR7   | F7                  | ATGAGAGTGCAGCCTTCAAAC           | R7                  | TCACAGGTAAACGGGGCACG            | AM292328         |
| <i>Tcas</i> GR104 | F8                  | ATGTGTTATTTCAATTAATC            | R8                  | TTATTTAGCTGAGCTTTGAT            | AM292329         |
| <i>Tcas</i> GR9   | F9                  | ATGGAAAAGTCGACGAAAAT            | R9                  | TTAGCAAATAGAGTTTCTTG            | AM292330         |
| <i>Tcas</i> GR10  | F10                 | ATGAGAAATGACCATGGGTCC           | R10                 | TTAGGACATGGTTGTATTCCC           | AM292331         |
| <i>Tcas</i> GR11  | F11                 | ATGATCAAATTTTCCAAAG             | R11                 | CTACAAAATAATAATTAC              | AM292332         |
| <i>Tcas</i> GR12  | F12                 | ATGTCCAACCTGAAGAAGCTC           | R12                 | CTAAACTTGCACTATTTTATCG          | AM292333         |
| <i>Tcas</i> GR13  | F13                 | ATGCGGTTTTTGGGGGAAAGC           | R13                 | CTAAACTTGCACTATTTTATC           | AM292334         |
| <i>Tcas</i> GR14  | F14                 | ATGCCCTCCTTCCCAAGAC             | R14                 | TTAAAAATTGAACTGGATCA            | AM292335         |
| <i>Tcas</i> GR15  | F15                 | ATGGACATTAAATCAATCAA            | R15                 | TTATGTCAAGTAGAAAGCGTG           | AM292336         |
| <i>Tcas</i> GR16  | F16                 | ATGCCTCAAGTCAAACCTCCAC          | R16                 | CTACTCCACAAAATTGTAC             | AM292337         |
| <i>Tcas</i> GR17  | F17                 | ATGAACACGTTTAAAATTTTCC          | R17                 | TTAGGCGGTGGTACCATTGCC           | AM292338         |
| <i>Tcas</i> GR150 | F18                 | ATGAACACGTTTAAAATTTTCC          | R18                 | TTAGGCGGTGGTACCATTGCC           | AM292339         |
| <i>Tcas</i> GR19  | F19                 | ATGACAAGTAAAGCACGCAC            | R19                 | TTACCAAACAACGAAGAGCC            | AM292340         |
| <i>Tcas</i> GR20  | F20                 | ATGACACCTCACGCTTTAATT           | R20                 | TTAGTAAACATTCCCATGAATAC         | AM292341         |
| <i>Tcas</i> GR21  | F21                 | ATGTTGCCTAAACAATTTT             | R21                 | TTAATAACTTTCTGTCGCG             | AM292342         |
| <i>Tcas</i> GR22  | F22                 | ATGTTCCGCGACTTGGGCAG            | R22                 | TCAATAAAGAGTTGAGTTTGTG          | AM292343         |

*T. castaneum* Grs

|                   |     |                         |     |                          |          |
|-------------------|-----|-------------------------|-----|--------------------------|----------|
| <i>Tcas</i> GR79  | F23 | ATGGAATACAGATCGCAAAC    | R23 | TTAATTAATTTGAAATTGTAAC   | AM292344 |
| <i>Tcas</i> GR123 | F24 | ATGTCGGATTTCCAAAACTG    | R24 | TTATTGTCCGGCAAGTGATGTG   | AM292345 |
| <i>Tcas</i> GR25  | F25 | ATGTCACAAGTTATGCTAATC   | R25 | CTAATTTTTTGGAAATTTTTTGA  | AM292346 |
| <i>Tcas</i> GR26  | F26 | ATGGAAATAAGCGACTTGGCC   | R26 | TTATCCCCGCATATTGAG       | AM292347 |
| <i>Tcas</i> GR27  | F27 | ATGTCGCACTCGAACCCC      | R27 | TTAATTGTTTCCTAATATCGTGC  | AM292348 |
| <i>Tcas</i> GR28  | F28 | ATGCGTTTAATAAGAAAGATG   | R28 | TTAACGTCTTACTTCAAC       | AM292349 |
| <i>Tcas</i> GR29  | F29 | ATGAGAGTGCAGCCTTCA      | R29 | TCACAGGTAAACGGGGCACG     | AM292350 |
| <i>Tcas</i> GR30  | F30 | ATGAGAGTGCAGCCTTCAAAC   | R30 | TCACAGGTAAACGGGGCACG     | AM292351 |
| <i>Tcas</i> GR31  | F31 | ATGGGCTCGGTTGCAATTAATC  | R31 | TTAAAACCTGATCAATTAAGAATG | AM292352 |
| <i>Tcas</i> GR32  | F32 | ATGAGCTTCAAGTTGTTGAG    | R32 | TTATGGTTGCGAATAGTTCG     | AM292353 |
| <i>Tcas</i> GR33  | F33 | ATGGAAATAAGCGACTTGGCC   | R33 | TTATCCCCGCATATTGAGTAAAC  | AM292368 |
| <i>Tcas</i> GR34  | F34 | ATGAGTTCCCAACTATTG      | R34 | TTATCGTTCTTTATCGAACTGG   | AM292355 |
| <i>Tcas</i> GR35  | F35 | ATGCGTTTGAAATGGTATTAC   | R35 | TCAATTTTCTTTAAATTGG      | AM292356 |
| <i>Tcas</i> GR105 | F36 | ATGTATTTTTCACGACGAG     | R36 | TCAAAAACCGAATTCAATAATTAC | AM292357 |
| <i>Tcas</i> GR37  | F37 | ATGCTGAAGTGGGTCCTTA     | R37 | TTATGGTTGCGAATAGTTCG     | AM292358 |
| <i>Tcas</i> GR38  | F38 | ATGAATAATAAACTTAACATG   | R38 | TTAAATTCGCTCAACTTGG      | AM292324 |
| <i>Tcas</i> GR39  | F39 | ATGAGAAATGACCATGGGTC    | R39 | ACGTTAGCAATTGCTCTTCTTG   | AM292360 |
| <i>Tcas</i> GR40  | F40 | ATGGTGTTTGCCGAGCTCTG    | R40 | TTATACCACAGCGAAAATAGC    | AM292361 |
| <i>Tcas</i> GR41  | F41 | ATGATCGAAGTTGGTAAAAC    | R41 | CTAGTTGTATTTTCCCTGCTTTTG | AM292362 |
| <i>Tcas</i> GR71  | F42 | ATGACAGACCACAACCTAC     | R42 | TCAGTGTTTATTATTAACCTG    | AM292363 |
| <i>Tcas</i> GR43  | F43 | ATGGATTTCCAGTTGTTAC     | R43 | TTAGGAATTACGAAACTGCAC    | AM292364 |
| <i>Tcas</i> GR44  | F44 | ATGACTAGAGCTATGGTTCG    | R44 | TCATATCGAAAAGTTTTGTGGC   | AM292365 |
| <i>Tcas</i> GR45  | F45 | ATGTGTTATTTCAATTAATC    | R45 | TTATTTAGCTGAGCTTTGAT     | AM292366 |
| <i>Tcas</i> GR46  | F46 | ATGGAAGAAAAACTGGTG      | R46 | TTACTGTTTAAGTGATGCCG     | AM292367 |
| <i>Tcas</i> GR47  | F47 | ATGGATTTAGAAGTGTTGG     | R47 | TTAATCCTGAAATTGCGCAACC   | AM292354 |
| <i>Tcas</i> GR48  | F48 | ATGCACACACTTCAACATTTTAC | R48 | TTAAATACTATACTCGTATG     | AM292369 |
| <i>Tcas</i> GR49  | F49 | ATGTGCCAAATAAAAAACAAG   | R49 | TCATCTGAAATTTGCCTC       | AM292370 |
| <i>Tcas</i> GR50  | F50 | ATGTCGCTTTATTCGTCCATC   | R50 | TCACTGTTCTGTTTCTTTG      | AM292371 |
| <i>Tcas</i> GR51  | F51 | ATGAACATGATTCTCAAACATC  | R51 | TTATTCCTTTTTGGTTTTGATT   | AM292372 |

|                  |     |                          |     |                         |          |                         |
|------------------|-----|--------------------------|-----|-------------------------|----------|-------------------------|
| <i>TcasGR54</i>  | F52 | ATGCAGGATTCGTTCCAATATATC | R52 | TTACAGCGACATATTA AATTG  | AM292375 |                         |
| <i>TcasGR53</i>  | F53 | ATGCTGAAGTGGGTCCTTAAAG   | R53 | GACGATCAAAAACGTGAC      | AM292383 |                         |
| <i>TcasGR52</i>  | F52 | ATGAGCTTCAAGTTGTTGAG     | R52 | TTACAAGTTGATGTTTGTG     | AM292373 |                         |
| <i>TcasGR125</i> | F55 | ATGATCAAATTTTCCAAAG      | R55 | TTAACAAGTGCTATTGTTTG    | AM292376 |                         |
| <i>TcasGR56</i>  | F56 | ATGTTGCCTAAACAATTTTTAAA  | R56 | TTATTTGTAACACTTTTTACTC  | AM292377 |                         |
| <i>TcasGR57</i>  | F57 | ATGAAAGAAGTGCCCGGTTGGC   | R57 | TTATTCGATAAACTGTATCG    | AM292378 |                         |
| <i>TcasGR98</i>  | F58 | ATGTCATACAGACTGTCTCGC    | R58 | TTATTTATTTAAACCTTG      | AM292379 |                         |
| <i>TcasGR59</i>  | F59 | ATGTGGAGTGAAAATATTACAC   | R59 | CTAATTTTTTGGAATTTTTTG   | AM292380 |                         |
| <i>TcasGR60</i>  | F60 | ATGATACTAGTACTACTAGTG    | R60 | TCAATAAAGCCAAAACAATTTG  | AM292381 |                         |
| <i>TcasGR61</i>  | F61 | ATGACCAAAGCACAGTCTATG    | R61 | TTATGGCCACAAGTGGGTTTG   | AM292382 |                         |
| <i>TcasGR62</i>  | F62 | ATGATGGATAGAATAAATCAC    | R62 | TTATTGTCCGGCAAGTGATG    | AM292374 |                         |
| <i>TcasOr1</i>   | F1  | ATGAATAATTCCAGGCCTGC     | R1  | TCATTCTCTCACCTCATG      | AM689931 | <i>T. castaneum</i> Ors |
| <i>TcasOr2</i>   | F2  | ATGTTTAAAACCGTAACGAGG    | R2  | TCACTAAATTCCTGAAATTAC   | AM689904 |                         |
| <i>TcasOr3</i>   | F3  | ATGTCCAAAAGTGAAAAAATCC   | R3  | TCAGTGATTTATGCCGTG      | AM689905 |                         |
| <i>TcasOr4</i>   | F4  | ATGGACGAAGAGTTTTTAATCG   | R4  | TCATTTGACAATTTCTTTGTG   | AM689906 |                         |
| <i>TcasOr5</i>   | F5  | ATGGTGTGGTCACCCAAAGATG   | R5  | AAGTATCACTAGTTGCAAAC    | AM689907 |                         |
| <i>TcasOr6</i>   | F6  | ATGAGTCCGCACGATTCGGG     | R6  | TTACTCTAACACAAATCTGTG   | AM689908 |                         |
| <i>TcasOr7</i>   | F7  | ATGTACCGACTTGTCGCTTCC    | R7  | TCACTAACTCACAGTGTAAGC   | AM689909 |                         |
| <i>TcasOr63</i>  | F8  | ATGGGTTTTATGATACAGG      | R8  | TTAGGAATCTTTATACAGGCG   | AM689910 |                         |
| <i>TcasOr9</i>   | F9  | ATGGAAAAATCGTCAA AATTATC | R9  | TCAGTTAACTCCTTCAAGAGC   | AM689911 |                         |
| <i>TcasOr10</i>  | F10 | ATGGCCACTTTCTACTTTAC     | R10 | TCATACCAGCAAAAAGTTTCG   | AM689912 |                         |
| <i>TcasOr11</i>  | F11 | ATGGGCAAAGTCAAGTTTACG    | R11 | TTATTTCTGATTCATAGCGTTG  | AM689913 |                         |
| <i>TcasOr12</i>  | F12 | ATGGCACATAATCTGGACG      | R12 | TTATTCCAAATTAAGCAAATAG  | AM689914 |                         |
| <i>TcasOr13</i>  | F13 | ATGAGTGCAATGTCGACGG      | R13 | TTAATTA AACTGAAACAAAATC | AM689915 |                         |
| <i>TcasOr56</i>  | F14 | ATGACCGCAACGAAAAGCC      | R14 | TTAAATATTCATTTGCCTC     | AM689916 |                         |
| <i>TcasOr15</i>  | F15 | ATGAGCAAAAACCTCAAAG      | R15 | AGTATTCATTTGTTTCAAAAAC  | AM689917 |                         |
| <i>TcasOr16</i>  | F16 | ATGATGAAATTC AAGGTC      | R16 | TCATTTGAGTTGCACCAACACC  | AM689918 |                         |
| <i>TcasOr17</i>  | F17 | ATGTCCA ACTTTAGCTGG      | R17 | TTACCTCAA AATTTCTCTATGG | AM689919 |                         |

|                 |     |                      |     |                       |          |
|-----------------|-----|----------------------|-----|-----------------------|----------|
| <i>TcasOr18</i> | F18 | ATGGCAAACACTGGAGTACC | R18 | TTAATCTTTCCCAAATCAGTC | AM689920 |
| <i>TcasOr19</i> | F19 | ATGGTTCTACTTCCGACTG  | R19 | TCATACGGTAACAAACAGAGC | AM689921 |
| <i>TcasOr20</i> | F20 | ATGATGGACGAGACTTACC  | R20 | ACGGTTTTAATTTCAAAGTAG | AM689922 |
| <i>TcasOr21</i> | F21 | ATGGAGAAATATGATTGG   | R21 | TTACTTCAAATTTCTTGGTGG | AM689923 |
| <i>TcasOr22</i> | F22 | ATGGCAAAGGACTCGTCCC  | R22 | CACTAAGTGGACTGGTGCAA  | AM689924 |
| <i>TcasOr23</i> | F23 | ATGGCAAAGACACGTCCC   | R23 | ACTATGTGGATTTGTGCAAAG | AM689925 |
| <i>TcasOr24</i> | F24 | ATGACTGAAGAGAAACAG   | R24 | ATTGCAGGATTGTGAGAATGG | AM689926 |
| <i>TcasOr25</i> | F25 | ATGACCGAAGAGAAAGAG   | R25 | TTACTACCCCATCATAAAGCC | AM689927 |
| <i>TcasOr26</i> | F26 | ATGATGGAATCAACCGTC   | R26 | ACTAAGAAGTACGTTAAG    | AM689928 |

**(B)**

|                  |       |                       |       |                            |          |                         |
|------------------|-------|-----------------------|-------|----------------------------|----------|-------------------------|
| <i>TcasGR1</i>   | GrF1  | TGGTAACACGTTTCAATGAG  | GrR1  | CACAAATAATGCCAAGGAAAG      | AM292322 | <i>T. castaneum</i> Grs |
| <i>TcasGR2</i>   | GrF2  | TAATCAAATCTTTAACGAG   | GrR2  | GAGCTTTCCACAACGAG          | AM292323 |                         |
| <i>TcasGR3</i>   | GrF3  | GTCTCAAGTCGCCGATTATC  | GrR3  | GCTGTGACAGTAACCCGTAG       | AM292359 |                         |
| <i>TcasGR4</i>   | GrF4  | CAATCTTTGGAGTGTCTTTC  | GrR4  | GTGTAAACAGTGGCCACAGTTGG    | AM292325 |                         |
| <i>TcasGR5</i>   | GrF5  | GTGTTGATCTTCAATAGTC   | GrR5  | CCATAAAATAAAGATCACACTGTAGG | AM292326 |                         |
| <i>TcasGR6</i>   | GrF6  | GAGTGCTGTGGTTATCAC    | GrR6  | AACTGAAACGAATACCGTGATC     | AM292327 |                         |
| <i>TcasGR7</i>   | GrF7  | CGTACATAGTCCTCATGTC   | GrR7  | CACAAGCACACCGTACGCACG      | AM292328 |                         |
| <i>TcasGR104</i> | GrF8  | TTTAACGACGTCTTCGGG    | GrR8  | ACTAGGCACAAATTCGCGGC       | AM292329 |                         |
| <i>TcasGR9</i>   | GrF9  | CATCGTTTCTCAACAAC TTC | GrR9  | CGTGACCACAGCACTCG          | AM292330 |                         |
| <i>TcasGR10</i>  | GrF10 | ATCCTGGGCGCATATCGCG   | GrR10 | TGAAGGAGATCCCCTGGTCC       | AM292331 |                         |
| <i>TcasGR11</i>  | GrF11 | GTACATCTTGTGCCGTC     | GrR11 | CCAAATCCATATGGAAG          | AM292332 |                         |
| <i>TcasGR12</i>  | GrF12 | AATGATATTTTCGGCTGG    | GrR12 | CTGATCGTACTCTCCCGCATTGC    | AM292333 |                         |
| <i>TcasGR13</i>  | GrF13 | AATGATATTTTCGGCTGG    | GrR13 | CTGATCGTACTCTCCCGCATTGC    | AM292334 |                         |
| <i>TcasGR14</i>  | GrF14 | CACCACAATCACGGCCATGG  | GrR14 | CACGAGCAGCCAATAGAAGCAG     | AM292335 |                         |
| <i>TcasGR15</i>  | GrF15 | GTTTTCTTACCGTTCCAG    | GrR15 | ACGCCACGTTCACAATTTGATC     | AM292336 |                         |
| <i>TcasGR16</i>  | GrF16 | GTGACTCCTATATTGTCATG  | GrR16 | CGCTTCTTGACACAAGTCGGTCAC   | AM292337 |                         |
| <i>TcasGR17</i>  | GrF17 | TGGAGACGCATATGCGGTAC  | GrR17 | GTGACTTTTGCTCACGACTC       | AM292338 |                         |

|                   |       |                       |       |                           |          |
|-------------------|-------|-----------------------|-------|---------------------------|----------|
| <i>Tcas</i> GR150 | GrF18 | TGGAGACGCATATGCGGTAC  | GrR18 | GTGACTTTTGCCTCACGACTC     | AM292339 |
| <i>Tcas</i> GR19  | GrF19 | CATTTATTATTGTTAGTGTGC | GrR19 | GGCAAAAATAATAAATGCAAAG    | AM292340 |
| <i>Tcas</i> GR20  | GrF20 | GAACGCTTGAACGAGTTTATG | GrR20 | GATACCCAGCGTTACACACCTC    | AM292341 |
| <i>Tcas</i> GR21  | GrF21 | GTGGACCAAGTTGCAGCCC   | GrR21 | TAATTGCAACTAAAAACAGGGCTG  | AM292342 |
| <i>Tcas</i> GR22  | GrF22 | TGATTGGTGATTTGCACACT  | GrR22 | CGTTGCAAAGATCACTCGC       | AM292343 |
| <i>Tcas</i> GR79  | GrF23 | GAGAATTTGACCAAATTGTGG | GrR23 | ACCTACAAGTCCAAGAAATGTAT   | AM292344 |
| <i>Tcas</i> GR123 | GrF24 | AATGTCCAAGCGGGCG      | GrR24 | TGTAAGTGGTGACACC          | AM292345 |
| <i>Tcas</i> GR25  | GrF25 | TGGCCGAAGCCTTTAGCAGC  | GrR25 | GAGGTAAGCGCCAGATTCTCC     | AM292346 |
| <i>Tcas</i> GR26  | GrF26 | GAGTGCTGTGGTTATCAC    | GrR26 | AACTGAAACGAATACCGTGATC    | AM292347 |
| <i>Tcas</i> GR27  | GrF27 | GTACCAGGGAATTCTAGTCG  | GrR27 | AGAGGCGTTCGTACCAGTGC      | AM292348 |
| <i>Tcas</i> GR28  | GrF28 | GTTTTTCCAGTGGAACACC   | GrR28 | GAGAATAATCAATAAGCGTG      | AM292349 |
| <i>Tcas</i> GR29  | GrF29 | CGTACATAGTCCTCATGTC   | GrR29 | GATCAAGAAACCAAACGACC      | AM292350 |
| <i>Tcas</i> GR30  | GrF30 | CGTACATAGTCCTCATGTC   | GrR30 | GATCAAGAAACCAAACGACC      | AM292351 |
| <i>Tcas</i> GR31  | GrF31 | CGACAACAACATGTCCTAC   | GrR31 | CAAACCGAAATTAATCGC        | AM292352 |
| <i>Tcas</i> GR32  | GrF32 | CGATATTTTCGGGTGGCCC   | GrR32 | CCAGGAAATTACAGTAACGTTGG   | AM292353 |
| <i>Tcas</i> GR33  | GrF33 | GAGTGCTGTGGTTATCAC    | GrR33 | AACTGAAACGAATACCGTGATC    | AM292368 |
| <i>Tcas</i> GR34  | GrF34 | CGCTAGTTTCGCTAATTTTCC | GrR34 | GTGGAAAAAACCGCCGGCTGTAAAC | AM292355 |
| <i>Tcas</i> GR35  | GrF35 | TGATATTTTCGGCTGG      | GrR35 | CCACCCAAAGAATAAAAAGCCACAC | AM292356 |
| <i>Tcas</i> GR105 | GrF36 | ACGACATCTTTGGCTGGA    | GrR36 | GTTGTAATTGTGGCCAG         | AM292357 |
| <i>Tcas</i> GR37  | GrF37 | ACGACATCTTTGGCTGGAC   | GrR37 | GTCCCAAATGTGTTGAAAAGAGC   | AM292358 |
| <i>Tcas</i> GR38  | GrF38 | GTGTGAAACTCTTCAATGAGG | GrR38 | TAAAGGGAACACTGGCCAGGGCC   | AM292324 |
| <i>Tcas</i> GR39  | GrF39 | ATCCTGGGCGCATATCGCG   | GrR39 | TGAAGGAGATCCCCTGGTCC      | AM292360 |
| <i>Tcas</i> GR40  | GrF40 | CGGGGTACAATCTCACCACC  | GrR40 | CCAATTATCAAGCGCCATTTCC    | AM292361 |
| <i>Tcas</i> GR41  | GrF41 | CGTTGGTGTTATTTACACAAC | GrR41 | CTACCAGTTTAGTTACCATG      | AM292362 |
| <i>Tcas</i> GR71  | GrF42 | TGAGTTTTTTGGGTGGCCC   | GrR42 | CATAAATGCAACGCCAACG       | AM292363 |
| <i>Tcas</i> GR43  | GrF43 | CGCAACTTTGGATTTCCCTCG | GrR43 | CCACACAGTCACACAAGATAATC   | AM292364 |
| <i>Tcas</i> GR44  | GrF44 | CAATCTTTGGAGTGTCTTTC  | GrR44 | GTGTAAACAGTGGCCACAGTTGG   | AM292365 |
| <i>Tcas</i> GR45  | GrF45 | TTTAACGACGTCTTCGGG    | GrR45 | ACTAGGCACAAATTCGCGGC      | AM292366 |
| <i>Tcas</i> GR46  | GrF46 | TAATCAAATCTTTTAACGAG  | GrR46 | AGGTGGTAACACCTCC          | AM292367 |

|                   |       |                        |       |                           |          |
|-------------------|-------|------------------------|-------|---------------------------|----------|
| <i>Tcas</i> GR47  | GrF47 | GTGTGGACGGGTGATGG      | GrR47 | CAGCAGCTGTTATCTTAACTT     | AM292354 |
| <i>Tcas</i> GR48  | GrF48 | GATTATGCTGGCTTTGAGC    | GrR48 | CAGAATTGAGTACCAAATAGCC    | AM292369 |
| <i>Tcas</i> GR49  | GrF49 | CACCACAATCACGGCCATGG   | GrR49 | CACGAGCAGCCAATAGAAGCAG    | AM292370 |
| <i>Tcas</i> GR50  | GrF50 | CGTCTTGTCCACATTTTCC    | GrR50 | GTCGCAAAGATACGCAAGTGCC    | AM292371 |
| <i>Tcas</i> GR51  | GrF51 | CGAGAATTTGTCCGAAATGG   | GrR51 | CAATGGCATCAAACTCTTCAC     | AM292372 |
| <i>Tcas</i> GR52  | GrF52 | CAAAATTTTCGGCTGGTCC    | GrR52 | AAACTGAAAGGTGTATTATAGCG   | AM292375 |
| <i>Tcas</i> GR53  | GrF53 | CGATATTTTCGGGTGGCCC    | GrR53 | CCAGGAAATTACAGTAACGTTGG   | AM292383 |
| <i>Tcas</i> GR54  | GrF54 | AATGATATTTTCGGGTGGC    | GrR62 | CCAGAAAATCACCACAATAATGTAC | AM292373 |
| <i>Tcas</i> GR125 | GrF55 | CGTATCCATTGGTGTTTCGC   | GrR55 | TGCTGGCACAAGCATAACACC     | AM292376 |
| <i>Tcas</i> GR56  | GrF56 | GTGGACCAAGTTGCAGCCC    | GrR56 | TAATTGCAACTAAAAACAGGGCTG  | AM292377 |
| <i>Tcas</i> GR57  | GrF57 | ATGGCTTGGCAATGCTTGAG   | GrR57 | GACCAAATTTGTCCCAAACGAG    | AM292378 |
| <i>Tcas</i> GR98  | GrF58 | TGACATTTTTGGTTGGCCG    | GrR58 | CGTCTGGACAAGACTCG         | AM292379 |
| <i>Tcas</i> GR59  | GrF59 | TGGCCGAAGCCTTTAGCAGC   | GrR59 | GAGGTAAGCGCCAGATTCTCC     | AM292380 |
| <i>Tcas</i> GR60  | GrF60 | GCGCTTGATGCACCGCC      | GrR60 | GTACTAGTACTACAACCGC       | AM292381 |
| <i>Tcas</i> GR61  | GrF61 | TTCTGTAATGTTTTGATGGAG  | GrR61 | CAAACCTGCGCCTAAGTATAA     | AM292382 |
| <i>Tcas</i> GR62  | GrF62 | GGTGAAACTGTTCAATGAG    | GrR53 | CGAACGTAACATTAGACAAAATA   | AM292374 |
| <i>Tcas</i> Or1   | OrF1  | CGAAAGTAAGTCTCTCGGTAC  | OrR1  | CCAAATTGTTAATCCATACTCAG   | AM689931 |
| <i>Tcas</i> Or2   | OrF2  | TAATCAAATCTTTTAACGAG   | OrR2  | TACCTCTTCAATCGTCG         | AM689904 |
| <i>Tcas</i> Or3   | OrF3  | CTCTTGAAAGAGGAGACTTTAC | OrR3  | GGAACCACCCAACGCACATGCCG   | AM689905 |
| <i>Tcas</i> Or4   | OrF4  | CTCGTGCAAGTTCATCGC     | OrR4  | CGTGTTGTAGGGCAACCAGCC     | AM689906 |
| <i>Tcas</i> Or5   | OrF5  | TGGGTTTGTCCAGTAATGC    | OrR5  | AAAGCCATCGGAATCCAC        | AM689907 |
| <i>Tcas</i> Or6   | OrF6  | TCTGTGCTCCTTGTTTGTTT   | OrR6  | TCACAGCGAAATAGACAGCG      | AM689908 |
| <i>Tcas</i> Or7   | OrF7  | AATCTTGAGGAAAGTGTTAG   | OrR7  | AAAGCCGAAGCTGTCCCG        | AM689909 |
| <i>Tcas</i> Or63  | OrF8  | CCTCCAGTTGTTCTGGGAGCG  | OrR8  | CGTAGTAGCAGTAGGTGGCAACC   | AM689910 |
| <i>Tcas</i> Or9   | OrF9  | GCCGACATTGTTGGGACGC    | OrR9  | GTACGAGGAAGCGGACATTG      | AM689911 |
| <i>Tcas</i> Or10  | OrF10 | CGGCTAAAATCTCAATTGGG   | OrR10 | GTCAATTTGACCGGACTTTGGGCC  | AM689912 |
| <i>Tcas</i> Or11  | OrF11 | GGTTCTTTGTAAATCACCTG   | OrR11 | TCGCAGCTCTTTGGCCCCG       | AM689913 |
| <i>Tcas</i> Or12  | OrF12 | ACTAATCTTTTCACAACCTG   | OrR12 | ACAAATAAATCTCCATGAGGAC    | AM689914 |

*T. castaneum* Ors

|                 |       |                       |       |                        |          |
|-----------------|-------|-----------------------|-------|------------------------|----------|
| <i>TcasOr13</i> | OrF13 | GAGCAAGTGCGCGATTTAATC | OrR13 | CCTGTGGTAAATATAATGGCG  | AM689915 |
| <i>TcasOr56</i> | OrF14 | GCAGATGCCGTCATTTGCGG  | OrR14 | CTCGATTCGTTCAATCTCTCG  | AM689916 |
| <i>TcasOr15</i> | OrF15 | GGGAATCCCGATAGGGG     | OrR15 | CGAGCCTGCTCCTCTCAC     | AM689917 |
| <i>TcasOr16</i> | OrF16 | ACGAGGATCTTAAGGGGGTG  | OrR16 | CCACCCAGTATTTGATCGCCG  | AM689918 |
| <i>TcasOr17</i> | OrF17 | GGACAAATGGACCAAAGAC   | OrR17 | CTTGGTGGTGT TTTATGCACG | AM689919 |
| <i>TcasOr18</i> | OrF18 | CATCATAATTTCAACCGAC   | OrR18 | TTCCCCAAATCAGTCAC      | AM689920 |
| <i>TcasOr19</i> | OrF19 | TCCACCTCGCGACCACCG    | OrR19 | ACAAACAGAGCAAAGCTC     | AM689921 |
| <i>TcasOr20</i> | OrF20 | CGAACCGATTTGGCGTTC    | OrR20 | GTGAAATATGAATAAGCCG    | AM689922 |
| <i>TcasOr21</i> | OrF21 | TTGGGGGAGCGACGCTG     | OrR21 | GCACGTTATTAGGTCGCG     | AM689923 |
| <i>TcasOr22</i> | OrF22 | AATGGATGCTATGTGGTC    | OrR22 | GGGCAAACGACATGATACC    | AM689924 |
| <i>TcasOr23</i> | OrF23 | CGCTACCAGCAACACATC    | OrR23 | GACATGATCCCGATCGGGG    | AM689925 |
| <i>TcasOr24</i> | OrF24 | CACTCATCTCACAACCAC    | OrR24 | CCGCAACAGACAAACTCG     | AM689926 |
| <i>TcasOr25</i> | OrF25 | CGTCTCTCCATTATCACC    | OrR25 | TACCGAAAAGAACGCCTG     | AM689927 |
| <i>TcasOr26</i> | OrF26 | AGGAGGAAGATGTTGGCC    | OrR26 | GGGACACGTA ACTAAACGGC  | AM689928 |

(A) Nucleotide sequences of the primers that had been used to amplify the *T. castaneum* chemoreceptor (*TcasGR* and *TcasOr*) DNAs using the genomic DNA as a template. (B) Nucleotide sequences of the primers that were used in Q-real time RT-PCR and whole-mount *in situ* RT-PCR analysis. The name of the gene target is given at the left, followed by the primer name and the primer sequence (5'-3').
