# Supplementary material for: A Family of Chemoreceptors in Tribolium castaneum (Tenebrionidae: Coleoptera)
Source: PubMed Central journal article supplement (PMC2121604; doi:10.1371/journal.pone.0001319), 2007-12-19
Supplement: pone.0001319.s003.pdf [file pone.0001319.s003.pdf]

**A**

>TcasGr1 (AM292322)

MQHEVVKKFLHSVRIVFVQSEIFCLVNFNHRESYFRLSKAKSFCTFVAALVYCSVTFFALSE  
LLTDLATSILLKVSSLLIGFCASIYVGTWINTSINGTKFIEFINKLIEFDVKLQNVSLIIN  
YENQRTRSRIHLFVRYVFTSYLLFDYFVQRNQEYKYYQILSHLSGIFFTVFNVAQCYLTT  
LVLMLQTRFVILNKQLTKITVKNFATKTQSAVLGKICTLHHHLSKLVTRFNEIFGLGLLLMF  
AVSFLIITQVIFVICVLVQSEKIVWLHLVYISFLGIICAADVFIICHVCYATIQEVRAKIYF  
FYLVKFYKVSXSGELIHKIETNEHEIIDKIEMFSLQILNERAEFNAAGFFPIDYTLVFSVSF  
G

>TcasGr2 (AM292323)

MEKSTKIFPVPGDKNLHKSYSKMLILAQIFGFFPVQGVGPDFRSLRFSWKSARVVYALFTL  
LGTFLISGFQMOKIATKGLDLLEANRLFFFLTGMASLLFLNLAKRWPKFVKDWCVVDFATFA  
SYGWPKGLNKKLNTLTVFMLIALGEHWLSRYSWAKVFLVEHILVQTNKLVLALECNNTTAE  
GFTYFLGNMSFAHIFALVEYDIFKALVLQNTINLQITFIWYNDLDFVMLISTALAYRFGQITR  
RIAAVASEKIKNEI IWKKLREDDYTRQCRLVRKVDKEIAYIVLLTFASDLLFILIQLFNSLRR  
MRNDLERLYFYWSFALLITRIVCLCLFGAKVHDESIIKPLLTLSVPTIYINLEIQRFIQQIG  
NSDIAITGKNFFSITRGLILSFVDYFVFLLC SILVNIAFIKLATEWPQLMKAWLKIELLVGN  
LGMRRNFRKCLDFIFTFITLLTIGLYFQLCEFSRLNFSVEHLLMELSRAIDSVACSKTVSDG  
IRHYVNVTFPHLFNGLVDYSLWKALIFQISNLQTTFGGTFGDTFIIILLSMAFATRMKQSR  
KIEALVKSHIAGAIPTYELVVIQFNRLR

>TcasGr3 (AM292359)

MYHQDQAVSILGEAIPKRRSVFLESGVNSADSFKASKVGPAPPIKFINKSSTDKFGNGAIYE  
VLKPIYALMRIVGIFPIKNTTEPGMFRVAPPELLGYSVVVFMGYIGFIEWDKVEIVRSQEG  
RFEEAVIDYLFVYLLPIIINPLVLYEARLANVVTDWVNFERYIYKLTKKKLSVFFGNKPV  
ILTVVLPPLLACGVMVTHITMAHFKIIQVVPYCYINCLIIYLIGGFWMQCDVVGKVASQLAE  
DFQMALKHVGPSSQVADYRSLWMLLSKLRDVGNASGYTVTFCLCLYLFLIITLTIYGLLSQL  
QAGFSTKDIGLTINAGLAIFILYFICDEAHYASNCLRVOFQKLLLELSWMNDEAQQEINM  
FLKATEMSPTDISLVGFFDVNRNLFKSLLATMVTYLVVLLQFQISIPPEASPTNSTTITTTQT  
PN

>TcasGr4 (AM292325)

MVRPELDLNSLKCITKVLTIILGLLSCSFPKLLVYCIIFGAIATLTCIEGLRDCPRKYSTPL  
AKITLILQRYCSVLLVFLTYFFNILFRKLLNAVKILSKIDETLNSKPLKPKIRTKVYLVY  
CSSALVLAAMTTFHLYEAGHSYKCGIQYHICNTVISATVCFMMLLMLEIWRRTILNNYL  
TIVLGETWTSLSVYHLVEISEIHFDLCAADDLNRVFEVQVLTIFGVSYFFISTFFYFFTT  
GNI IATYDKQFYIHNALIVRALFLFFQLWATVYTSSQVTREVQSRSNRMTPLKLQPQNF  
SI

>TcasGr5 (AM292326)

MTIQLLSLICKFGGWMGLTPVSVEPTGFSKPGYSLWILLFTLGVTISGVYRTDFYKLLSPM  
RLIVQTCDFLLALNISTILTTVRKQQQWAQLIQNLKVVATTKTKAWFLPFVVTNIIFVLF  
HTYEAFVWTRIMGVAYYEQYAVEFFQFYAQFIVYFLIYAVLEMLLQKYKTVTYVMTGQLKQ  
NSNLLKSVCADLCLLSECVDLFNSLFGFLVLLVALTTLQLLIYIQVIVIGTKNTIETVAYS  
VIFILWHIVGTFSGIFLCLDIRREIANVQVLAYKIEAKRRDNEIKMFVKIVDASCRNFTAAR  
FFELNRRITILGVSNAVITFLIVMVQKASYEKLSPVFLIQVAADTVLFI LNISTIIITARKK  
QQWNSLIKILKTVSNRNDKGDIFWFSPLVANLAFVTIVTYETFWWTQIMGAEFFKLYAVEY  
FQMYAQFIVGTFSVFCDLIEQKVKNIQMLVYQNEAEVVKILLDVINHPHFTAARFFDLN  
RKTILGVLNALFTFLIVVQFENLTS

>TcasGr6 (AM292327)

MEISDLAQLYGNELHIKQISKWLRGSARAQEIQRSELDKDGHVIDEHDQFFRDHKL LLLVL  
FRVLGVMPIQRGEIGRITFGWTSIPMLYAYVFYVVTTLVVLVGYERFDILLNKSKNLQFPL  
LSTLIIIIISLGLILAVVLLTSLALLEGFTLYHTTAYLHIITMINMNCALWYINCRAVGNA  
STALAESFQNVLPPTASNSKSTKVLFKDVRNCSAYIIAHYRVLWLSLSDLLQKMGNAYART  
YSTYSLFMMANITVAVYGFTSEIVDHGIRFSFKEIGLLVDSTYCLFLLFVFCDCSHQASLNI

ARRVQVTLQVNLSQVDPATRKEIDIFLVAIQMNPPKVSLKGYTVVNRELVTASVATIAIYL  
IVLLQFKISLLNMRG

>TcasGr7 (AM292328)

MRVQPSNTPPEKSQSLSTADTANLINKSLGKHNLOKSFQVAVILAQIFGFFPAQOGILGRDFRA  
IHFTWASARVGYTIVTILGATFVTVLQLHKIFAKGLNVI EANRLFFYCGLASGYLYLKLAM  
KWPRFMKDWSCVEVMASYGWPAGLNRRLNVLLAVFMSLALIEYIILMQTNKLVLALECNST  
SEGFYDFGKMSYSHIFSLMDYNIVMALVLQFITLQHTFIWVFNDFVMLLSTALAYRFTQV  
TDRTOQSMSESKNKSES AWKNLREDYNRLCRLCKRVDEEISYIVLMSFASDLLFILIQLFNSL  
RQMKNNLERIYFYWSFGFLIVRTVCLCLFGGKVNDSTQPMLVLSVSADVYNLEIQRFIHQ  
IGTLEVAFTGKNFFSITRGLILSIAGAIVSYELVLMQFNDSLLETISEQIDSCPYYL

>TcasGr104 (AM292329)

MCYFNYSKDIRSLSFYKICNIFGIVPPYSFEKPDSQKSLWKKIQGVVLSIIAAGTAYSI  
YVRHTYYRRLYTITHLVLDYLDEFILVALAFQVILNSCFCDPAKWIRLNNLQYIDEVLKNR  
DSHETNLLRNVSQFVYVILYILATVFLAYVVICEMGVVTLQAYTLHLFCVLYVLLHFLT  
YNLSLGIKLRYYDDVNNLFRIESEEKNIIVSLRQIGSLSQLLSETVALFNDVFGTCLILITG  
KSIVQLLTCLNFITNNLKSENEEFKEKLLAANLCLVIYTLVSVSLVMVTCDACTIASKQTI  
WCYKLOEQFVTNSEVRTELFKLAQHVSANIVHITAGNYFEINKATLCGIFGTTTTTYFIVILQ  
FNQSSAK

>TcasGr9 (AM292330)

MEKSTKIFPVPDGNLHKSYSKMLILAQIFGFFPVQGVGPDFRSLRFSWKSARVVYALFTL  
LGTFLISGFQMQKIATKGLDLLEANRLFFFLTGMASLLFLNLAKRWPKFVKDWCVVDFATFA  
SYGWPKGLNKKLNTLTVFMLIALGEHWLSRYSWAKVFLVEHILVQTNKLVLALECNNTTAE  
GFTYFLGNMSFAHIFALVEYDIFKALVLQNTINLQITFIWYNDLDFVMLISTALAYRFGQITR  
RIAAVASEKVTSEKSWIALNDDYNRLCHLCFLLEKLSYIILTSFLNNFYFIFQVFESEFYL  
HKATTLETVYYFISLGLLILRLVSVCFYGSWINEESKLSLDLSSYVPREVYNKEISRLVETL  
KFQSITSAVVTYELIVIQFRKKMERDEKPYSRNSIC

>TcasGr10 (AM292331)

MRNDHGSNTHLHPDDAIRRAKIVKVAASPTSANPDEEPDPELLDRYDNFYQTTKSLLVLFQI  
MGVMPIERSGKGRTRFRWLSSTSIYAYFIFGAETIFVTMVFKERLYLILRPGKRFDEYIYGI  
IFLSILIPHFLLPVAAWTNGTEVAKFKNMWTRFQLKYYQVTGTPIFHNLTILITYSLCVISW  
AVGIGIMLAQYYLQADMLLWHTFGYYHILAMLNCLCSLWF INCTAKGRVAVWMCNNLHKALE  
SRNPAKILGAYRDLWVDLSHMMQQLGKAYSMSMYCLLILLTTIVASYGSVTEIMDQGISF  
KEAGLFMIAFYCMTLLYIICNEGHHATRKMGEFRERLLNVNLSAVDQKTRQEVHMFMAIE  
KNPPIMNNGYANVNRKLISSVTTSIATYLVMLMQFRLLTLMRNAQLAARRAIANVSVSSGNT  
TMS

>TcasGr11 (AM292332)

MIKFSKVKSFTTHHDTLHNIYTSMKPVYAICKLIGLNTLRIGRKGELKQHKSDYFYFSFYI  
TSYTLISVYSLFRIATNENNSLVINKRLIFIECFVMMALTLIVTLFTFLARGTLIKSFDMLS  
HVDVSFIKAGFRLEYKQLLRSYLIISFVLFSLARVPVMLMTISADFIQQIMLFVSALIKA  
FSKYQFVVLVLQLQHRFGKINRTMRSFFSDNKQDDKIPQISDNLYILCRLHYKLTSMQKIN  
SAFSVQLLVSIGVSLFDVLFQAYLYYVATGKASFVTVPMIVCPIVWLMDEVVEIYLLVYAC  
ASTCEQANDTPSILHELNNYFHMDELNNVIL

>TcasGr12 (AM292333)

MSNLKLLKFLKLLGQLLGLAPVKFYVQKFYVVILAFLLTAGAIIISLVYQAPVYKELTDIKLV  
LNILSDVTLWLSNVNSLTTLTKRKKWNLLFKTLTHDEPRKSSLVQLILTQAFILMFVSYNIY  
VCQTVSNFEYFQKILLMIQLYYLYFDVIVISTFLQLFLEHYEVINRQTLDTADVKTTLTTVV  
EKECYKMKVTIDAFNDIFGWSFLLFTLYSSLLLLDYVSCVVALIILILQCGRVRSEVVKILN  
VLKKIALRRQTTNGDLDELIVTLSTHYFPVFSACDYFTIETKTVDLVLGVTVTYLVIIQFD  
DKIVQV

>TcasGr13 (AM292334)

MRFLGESPNGIYLYHDGRVKLLEGRVVDCCDDVSSVSQSEAGDEDRFSFTSSMVQSLDGNSS  
DLENSSEENCVMSNLKLLKFLKLLGQLLGLAPVKFYVQKFYVVILAFLLTAGAIIISLVYQA  
PVYKELTDIKLVNLSDVTLWLSNVNSLTTLTKRKKWNLLFKTLTHDEPRKSSLVQLILTQ

AIFLMFVSYNIYVCQTVSNFEYFQRKILLMIQLYYLYFDVIVISTFLQLFLEHYEVINRQTL  
DTADVKTLLTTVVEKECYKMKVTIDAFNDIFGWSFLLEFTLYSSLLLLLDYVSCVVALIILILQC  
GRVRSEVVKILNVLKIALRRQTTNGDLELIVTLSAHYFPVFSACDYFTIETKTVLDVVG  
TVTYLIVIIQFDDKIVQV

>TcasGr14 (AM292335)

MPLLPKTPPLPLTLLYKLLGIIQFPISAHFSFMSRFLCLPFYSYFFYLSYIYTTYSRKLSGIF  
KYIDQMAGYTGFLAMLTSMVMFYKRSNDLKTLLSNLESIQIYSIKPKERNSNHVRSGLFAL  
ITGNVLFYFPFLPSDVSYNLFSFVPLVVNALDHLFLNDILSDICDKFEQINQHFRRQIKSVDL  
FVIFPLTKAEKVRNLKEDEVTFVSVQKIQELSHLHYKLANFTVKISGLFEITTTITAMVMWFGY  
VIDTMYLFIHIRSRQEDTDTLVVIYTFNLFYLCFCFYWLLVMVAMFSRTQQSANKTATFVHE  
IWNKYALKNEVDKRVRLQLVAIRLLNNTKLQFTAKDFNLDWTFCHMMIAALTTYLVILIQF  
NF

>TcasGr15 (AM292336)

MDIKSIKTCFYVAKFFAITPSSYDKPTKLYQKLYPVLMLFIYTTITEIYSVYERRYMNAHLS  
GIQLVVRNLLDISLYLNAYHVFTMMTLKRHKWSTLFEILLKLESKDLSTRTFYGFVIVAHLL  
FLVIFVLNIWCWIVEIGGWLAFTKQLLIKFVEVYPLFVLLIVSNVVLKILVEKYRHQKNFIN  
ESNVETVKFNLFLLSQAVETFNDFGWTILQTVFFTVPRVLMYFDIFITEHESKPNWLFLLA  
NFLTNLLFEWFDQIVNVAYRMETWNVVFNNGSRKNLDVMKSFVNFRRPSFTAARFFEIDRINAE  
SRKPIRILFDVSSEIYNVEYKNVEFWRNIREDYDRLARLTQFLDKELSYLILFSIGFNCFWV  
MKLLYNVLRFGAESQTINFMFSFGFILLRFLSVFESCTRLNNESTRKPSFVIQFSHIPVDNIE  
FAGALVTYELTLFQYHAFYLT

>TcasGr16 (AM292337)

MPQVKLHKHYVPIILLSKILGIAPISYKNSNVNYSKIGIVQTVAYFVIFIIILTIVFFEKRSA  
LSPFELIQIRTINVFATFRTIANIILMAVLF LGTFIGRAKFLAILKQMRNLEPEFLKLDQLG  
ATVRNNRQIRRMVFLIGVLSFNLF GDLTLFIKEELDLVWREVCTFVVQVYPRLVVNTIN  
LTFLLTLLMILEGRFRVINDGIQALINDSRKVTRFPTELTCFNKIKHLVNLHKNLVKVAKDHN  
SLYSLHLLLWITVTFILLVGDYSYIVMYVFFFHLSDVRYVMVYLLKNNVLYGLELFI LAKIV  
TDLQCQEANSTKKLIVKIKIDIDKEDERNEVISSALKLSQNELEITACKFFSIDNALLFSANS  
TKKLIVKIRIDIDKEDERNEI ISSALKLSQSELEITACKFFSIDNALLSICGASSSYLFIM  
IQLDLGNKKNETSTILVE

>TcasGr17 (AM292338)

MNTFKIFRPIKILAEIFGLSPMTQKLTLSPLKVLQTVILGTTTCIYLTSLYIWFILTQMTFSG  
VTSPTIMKFVLSFRTGSFTFLMVAVLSSGTTFKLVAKTLENMTKIDKDLTELQKQKYLEKR  
NRHIFRTSVLLIFVMHLMFDTLGGLYSTWSKSKQVEYFLIHWYPRMLISTKLLAHFLILTV  
LKARFEAINNIIDSIRQNSQTRNQAVPTGTIKTLVQMHSNLVTTSEEVCDSFSIFGLVWISL  
IFVVLIGDAYAVLNSVLFQNVYKPLPVLIVSIVKNCLSYCFNLYHLASKSNQLSREAKVTKTV  
LLGVKIDICNEEERNSHCLGGTITRTMWFYQICGSAFSYLFIMLQFDLNNKKNQSLGNGTTA

>TcasGr150 (AM292339)

MNTFKIFRPIKILAEIFGLSPMTQKLTLSPLKVLQTVILGTTTCIYLTSLYIWFILTQMTFSG  
VTSPTIMKFVLSFRTGSFTFLMVAVLSSGTTFKLVAKTLENMTKIDKDLTELQKQKYLEKR  
NRHIFRTSVLLIFVMHLMFDTLGGLYSTWSKSKQVEYFLIHWYPRMLISTKLLAHFLILTV  
LKARFEAINNIIDSIRQNSQTRNQAVPTGTIKTLVQMHSNLVTTSEEVCDSFSIFGLVWISL  
IFVVLIGDAYAVLNSVLFQNVYKPLPVLIVSIVKNCLSYCFNLYHLASKSNQLSREAKVTKTV  
LLGVKIDICNEEERNSSVAVLQLMENKIEITACRLFNIDNALLFAICGSAFSYLFIMLQFD  
LNNKKNQSLGNGTTA

>TcasGr19 (AM292340)

MTSKARTFTIKCPVKKRKCTVSNVSLHSLKNKRSGASLQVGILDVFKCYNLRRIYFYCV  
SITFNVHLLFLLCSGYFTVHLLFYCPFIIFTVHLLCTYYFYAFIILLCVYFYFYAFIIFT  
VHLLFLLCIYFYFVPLFLLCIYFYCAFIIFTVHLLFLLCIYHFFCAFIIFTMHLFFCCAF  
IFFNMHLLFLLCLDYFTLHLLFLPCIYFYSAFIIFTIHLFYCVLIILLCIYFYFYAFILF  
TVHLLLLVCIYFYFYMHLLFCCAFIIFTMHLFLLCIYFYCALIILLCIYFYFCRAFIIFT  
HFYCAFSLYPLKSTFYLVNVRPFPERSMGITPMIWNSTRRLFVW

>TcasGr20 (AM292341)

MTPHALISSDFHDIKPLINLTKIFGFLPVCSSQKGQKTCLNLSINYCICGYIFSAIFLSLS  
ILGLTEDLNSAPIRMKNPIVKYIILIDLGEVAVTVLGILTPFKLPYFWKMLTGFGKIEQV  
LPPHHAPEEKKRSFWAVTIFLVLAASVIFFDVWVWGLSASDLGVFFKRFLPVYVSYLLIFVQ  
QIPFCFFVRVIRLKI EDLNGAFRAGLERVQNGENQWISVMKVNKQPKVIQKGSALS YERLNE  
FMRLVEEIEDVIEAINGFYGVHTLLILFSCLLHLVVTPTYLLIEVCNAGYLPFILLQVAWIV  
LHLIRLMYQVTTNLVLKLLTSPLLPDIKEQVEILAVQVSNKKIKFSSFGMLKISRSLTSTFG  
GALTTFLVILFQYGGIHNVY

>TcasGr21 (AM292342)

MLPKQFLKLFKDPDVCVYTAIHPLFYVCTFFGLAPYSLVRVENGKKVFKFAWWPLTRNALLVL  
ILLGALTYHAIFDLISFKDSDLQQLRYFEEVFSLLSCCSVIFGCIFALKVIEVFNIEEV  
DVAFRSLAVWVPYKHLVYVNIHLISGLVTVATLTVTIIFASYQYGTKTYSLFIVFMTVIL  
PYFINLLMELQYCHYLNILRVRYQLLNEYLETLVQETNRTSVEGWTDVSNVKKRSKEISKLP  
KSMLAISDPVIVDQVAALHIKLTDTAHMINYAFVCVQQLLRITVAFISIVTALFLVAINFNK  
SSSEENEGKTTQLDYFFTFWAFSNACEVMAIVWITSETCEEIVAGVTTYLVILIQFNNSDFV  
QRNSTEFDNATESY

>TcasGr22 (AM292343)

MFRDLGSTTMMVLNLFSSQMYFTKKLEQMRQVHEVDNQLKQMGCDLDIPNSVQKHLILLMV  
LVNLI FNTCGEVFSAWVRCQDQILIFLVNWYPRLIIGIMNSTLNLIFLLIQTRFEMINNIIT  
RGDVTSTTIKKLFLNHLKILVKVREINGIFAFQVLMCTSMNFVLLIGDLHTSIYIIFDFMY  
QHHKIVLDMGKNCVTVYFDLFYLSKRASDLCEANKTKILLVGLKIDIDQEEERNVVVTSVL  
KLMQNKLEITACRLFSIDNALLFSICGAASSYLFIMLQLDIGSKTQGTNSTLY

>TcasGr79 (AM292344)

MNSIPIETIFKFGKYTLTPKSRIEKKPSRQKQFYALFLIFFYTFGEVFTLVLRIRNMEYRS  
QTLMQTTLRRLIRDLSLYFSVIYSLLRVKRMMRSWYLLTNLTYNNTNRKYWLVNCCNLNSI  
VTIFFNFATKKLEQFIVRFMKYHFFGTLLKLSQLFSTFAGIEVLHVVKQCYHLQKINVQQSG  
IFINLPFLEHNLIRLKNCVIYFNRIFGWNILFGHIFTVCRITLIYIDDNVKGLGKQYNIASSK  
TLKLSINIIISLVQLWIFQLYLLILCDQILREFDQIVVILSKVKSILNKKCCEKCGLKKIEFC  
RPTFSAARFYGIDFSNTFLGLVGAVVTFLIVLLQFQIN

>TcasGr123 (AM292345)

MSDFQKLYQKFVNSIRILLFQSRIFGLVTFPTDRSKFRPSSLRFCNLNISIFTYVPMILYCV  
YTTATYDSFMIYKTTNIIILGLNVVYVVTAWICAITKRDMFVEFLKLVDFDSKLQTMNIKV  
NYHRVHRKIMVQSLGRVGLVVIIGTLAIIANLNGDTMIVEAMAYILLAMNSAVCHQTIELV  
KMLKIRFVILNKQINNLI EYFQKNKIGPVETKGTNKQLNLTNLKICALHHHLSKLVKLFNETF  
GIVLLL MFGVSFVIVITIFFFTANVQAGELYFMSLLNPILSNVTFVIDVVYVCDVCYSTIE  
EANKAGELIHKIDTEDHDIRDEIEMFSLQIANEQVEFNAAGFFAINYTLVFSILGGVTTYII  
ILIQLATSLAGQ

>TcasGr25 (AM292346)

MSQVMLIQFCAFVVVLKQKFCVVNQYIKQVCKLNNGHYKNFLSQVEI IHNEILVTHNEIQTI  
FSVPLLMKIASQFVGIFCSLYFCIFGYIYDDEMVPQNFHDI FLPLLCILTNLEILITVTV  
CELTILEYKRTKLLYRIPVTKTDSMLIRNINLFSLQLAHQKLEFSACGFFLINGTLLHTIV  
GAVTVYLIMFIQFDIATTTKGAAPAVSKARQFLPALPGYVPVYIRPGDTPLEDINPDLAFAF  
SSYARKNARLSFGRAEPVFDGKVPSNGSLNQISDIDDVNFQENLALTSTEHSLSQSQHIQK  
IPKN

>TcasGr26 (AM292347)

MEISDLAQLYGNELHIKQISKWLRGSARAQEIQKRSELDKDGHVIDEHDQFFRDHKL LLLVL  
FRVLGVMPIQRGEIGRITFGWTSIPMLYAYVFYVVTTLVVLVGYERFDILLNKSKNLQFPL  
LSTLIIIIISLGLILAVVLLTSLALLEGFTLYHTTAYLHIITMINMNCALWYINCRAVGNA  
STALAESFQNVLVPTASNSKSTKVLFKDVRNCSAYIIAHYRVLWLSLSDLLQKMGNA YART  
YSTYSLFMMANITVAVYGF TSEIVDHGIRFSFKEIGLLVDSTYCLFLLFVFCDCSHQASLNI  
ARRVQVTLQVNLSQVDPATRKEIDIFLVAIQMNPPKVSLKGYTVVNRELVTASVATIAIYL  
IVLLQFKISLLNMRG

>TcasGr27 (AM292348)

MSHSNPLEAFKLNFFLTKALTVWHVENPTYRKYKIFVVFVFAVTFVSAWICALVNYNVSEIS  
ENFYLLPAMSTGPLKYAIFQKNFTNIVNLTHLLETQYAKIRTENQKKIFDESVIFERKVMKN  
FAILIIPTCVAMFIVPYFQDRREPLIVWFPFDYKQPVVFDLVYFILAFACISIAYTNVSTD  
AFFYTCLIQIETQCEIVSDTLRNLDKIVTNGFRNVAESRKIFIECIEQYNVILRYTKIVSDT  
YQGILVVQFFCSLVALCLTMYKLSLTDLYFAIYEMHWYDASKQIQNEVVFIFMGQLEKPIVF  
YVANIFSLDLDTFKKIMQKAWSFFTALKNMHDIRNN

>TcasGr28 (AM292349)

MRLIRKMKSDLVLTIEASDAVLAYPQPSFHQTFVVFVIFGQFFGIMPLHGVSARKNVQEIRLE  
WKSFRFVYAVYNI FGAFVMGLFCILKFALDGLMLDKTGICVSNVDFVHFYYPVATMSFYVL  
NFFGSIQFIIISKHWVTIMKEWSFMEMSMRNYGSSINMKKRFFVVMTSVIMTLALGNPYCFNS  
SVYKVPVEHLLFIANAFITSQSCENATLYSGDEMYFRVAFPSVFTLIDYSLWKACFVEVRR

>TcasGr29 (AM292350)

MRVQPSNTPPEKSQSLSTADTANLINKSLGKHNLOKSFQKVVILAQIFGFFPAQGI LGRDFRA  
IHFTWASARVGYTIVTILGATFVTVLQLHKIFAKGLNVI EANRLFFYCSGLASGYLYLKLAM  
KWPRFMKDWSCVEVMASYGWPAGLNRRLNVLLAVFMSLALIEYILMQTNKLVLALECNST  
SEGFYDFFGKMSYSHIFSLMDYNI VMALVLOFITLQHTFIWVFNDVFMVLLSTALAYRFTQV  
TDRTOQSMSESKNKSESAWKNLREDYNRLCRLCKRVDEEISYIVLMSFASDLLFILIQLFNSL  
RQMKNNLERIYFYWSFGFLIVRTVCLCLFGGKVNDESTQPMLVLSVSADVYNLEIQRFIHQ  
IGTLEVAFTGKNFFSITRGLILSIAGAI VSYELVLMQFNDSLLETISEQIDSCPYYL

>TcasGr30 (AM292351)

MRVQPSNTPPEKSQSLSTADTANLINKSLGKHNLOKSFQKVVILAQIFGFFPAQGI LGRDFRA  
IHFTWASARVGYTIVTILGATFVTVLQLHKIFAKGLNVI EANRLFFYCSGLASGYLYLKLAM  
KWPRFMKDWSCVEVMASYGWPAGLNRRLNVLLAVFMSLALIEYILMQTNKLVLALECNST  
SEGFYDFFGKMSYSHIFSLMDYNI VMALVLOFITLQHTFIWVFNDVFMVLLSTALAYRFTQV  
TDRTOQSMSESKNKSESAWKNLREDYNRLCRLCKRVDEEISYIVLMSFASDLLFILIQLFNSL  
RQMKNNLERIYFYWSFGFLIIQRFIHQIGTLEVAFTGKNFFSITRGLILSIAGAI VSYELVLMQFNDSLLETISEQIDSCPYYL

>TcasGr31 (AM292352)

MGSVAINHSLKRLKIITIVILVVATGNI IHTTSNKQLQFFAVEHLLIQCYIAVSIFGSSSF  
EADLRQFYKTAYS AIFTVIDFSLCKAILVHAITIRSTFSWTFIDVFIMLTSTAFVFRKQLN  
AKVEMLKNARVKNTALWKQLRYEHYRLYQLSVLIDNNMSYIIIVSFATNLYFII IQLFGSMK  
IVKGLTKTAYYLISFALLIMRLISVCLCGASVHSESSKVLPLLFSVSSSSYNCEVLF SFLID  
QF

>TcasGr32 (AM292353)

MSFKLLRLVLKVGHFFAITPGFRKNRTTCPEKIYAYGVVAFITLGVAVSVFYRAKDYAKFIH  
IKAVVQITLDATLYVQNIYTVLTALTKKPLWFKLLKNLKMVQNHNNIREKSHYCLFVASNCF  
FWSYQSYMSYIFANIMGLEFYKQFAIEYFQMYVLFVNFVFAFFVVKMLLVRYRNLTKQLRFK  
LRF FEKLGNRRLGFVQRDQIQFDICLLKEGVLDVNDIFGWQILFLITYATLQILVYLHLAV  
MLGFQDIYMIVYIIVVIFWYTVNASTNIFLCDEICNEGQTILGISYSLEKKTGDEIQDLIS  
TIKDNFPRFYAARFFVINRGTILGILDIVTFLIVMIQFEMTQNSTNINFVSTFFKIPFYST  
LRPINLLVQIILDVILLILNVHTILTITKRQWCKLLENLKLDRNNSSFFVANVLFQLIH  
VYYTVVFTLLLVDFVKEYAFEYIQLYSQFILIYFLLFATLKI LLGKYTQLKACLMEEKRPV  
SLQVIKAIYSLRETVDVFNDFGWPFLLITFTSLQIMVYLQHIFVKS RPSPATIISNVTV  
ISWQAVCTFYNILLCDSVAHTAGELLGAVYSLDLELKHIEFNDFVTALKDNVPVFAAARFY  
AINRSTIFRMFNAIVTFLIVMVQFETNYSQP

>TcasGr433 (AM292368)

MEISDLAQLYGNELHIKQISKWLRGSARAQEIQRSELD SKDGHVIDEHDQFFRDHKL LLLVL  
FRVLGVMP IQRGEIGRITFGWTSIPMLYAYVYVVTVLVVLVGYERFDILLNKSKNLQFPL  
LSTLIIIIISLGLILAVVLLTSLALLEGFTLYHTTAYLHIITMINMNCALWYINCRAVGNA  
STALAESFQNVLPPTASNSKSTKVLFKDVRNCSAYIIAHYRVLWLSLSDLLQKMGNA YART  
YSTYSLFMMANITVAVYGF TSEIVDHGIRFSFKEIGLLVDSTYCLFLLFVFCDCSHQASLNI  
ARRVQVTLLQVNLSQVDPATRKEIDIFLVAIQMNPPKVSLKGYTVVNRELVTASVATIAIYL  
IVLLQFKISLLNMRG

>TcasGr34 (AM292355)

MSSQLLKLTHDALKILGIGPKSNKIYSFLLLTTLTLLVILSSIDRPYLKSYTYIKLVVSVLM  
DFIAYFFNFWTILFSRSDFFQQFECDNEPKLRHYLIFIFVNVFFWVIILMSNYAFTRIILLK  
SVLEIVI IDIEIYSQFLYGFMIYLILDITIKSKYRQMHRLLANYKVITSDEFFYLVSIESLA  
CELKNTVDDFNDIFGISFLLIISYSTLHFVNYIDDLFFFRFEKSKFEPFLISNISLVSLIFL  
FNCTLIIMCDCVRSEASKVVKNAQKLRHKFDLKTLLVLFNFPKFTAGGFFHVKKSTIFSILNTV  
STLLIVMVQFDKER

>TcasGr35 (AM292356)

MRLKWHYYITISMAFIIIFVSLEIYHIYTVVEESGFENFVKTYLVSDFENYVTFFCSLFIVVIL  
KLILAKYRQQDVTLLQITKAKNLLYSKQIVTILKKTNSNIFILKESVDTFNDIFGWIILCNI  
FEAAAKSLIYIDMIKKNVTQQNSDVFIFDNVWLFILWVGILSTIFLCDTILKKVDDILSQA  
YKLEASFDDLATYETDEVQIFIDVVQHNRPEFKAARFFSIDRSTLFSVLNSLTTFFLLVMIQF  
KEN

>TcasGr105 (AM292357)

MYFSRRDIRFLRPIFAVCRLFALVPYYNFEKFSLEHQLWQKIQAWTYLILLTTWTVISASTR  
IKSFKFLTIGVGITTDITDRVFTVAIPFVGIANSICILNQDKWRLNANNFQQIDKIFKTRDDR  
VKVYQAPVLQLFLYIFTYLSVTCYVTYAWSPIDHTESNIINDMCSLYIILQITLIVNYALAL  
KNRFKELQKYLKIETSCRYVGTLYRILTTMMEMVNDIFGWTLILILAKCITSSLSSLYTCIA  
GYEFNANFTISYILFALFNTFTGILLIMTCSGVHSESQKLVGVCYEYQDRFSDESKRRELL  
RLAQQVNANIAQITANFFDISRSTFLGILATITTYFIVIEFGF

>TcasGr37 (AM292358)

MLKWVLKVGNVLAMTPTKEKRFPHRIHSYFMVAFYVVFSSVSTFFKIPFYSTLRPINLLVQI  
ILDVILLILNVHTILTTITKRNQWCKLLENLKLDRNNSSFVANVLFQLIHVYYTVVFTLL  
LGVDFVKEYAFEYIQLYSQFILYFLLFATLKILLGKYTQLKACLMEEKRPMSLQVIKAQIY  
SLRETVDVFNDFIGWPFLLLITFTSLQIMVYLQHFVKSRRSPATIISNVTVISWQAVCTFY  
NILLCDSVAHTAGELLGAVYSLDLELKHIEFNDFVTALKDNVPVFAAARFYAINRSTIFRM  
FNAIVTFLIVMVQFETNYSQP

>TcasGr38 (AM292324)

MNNKLNMLVVKSMQRKIMEEKLVEKFLNSLQIYLQHNQIFGFVTFCTRSNFRSSKLLIL  
YNIILQVLFVSVSYWLYLVLEADDMLPIYKNTYLIILFADFAYLETTWICTLLKKDKLLEL  
FKRLIHFDTKCQENSTVIDYKRHKRLLCYLLARYVALALVILFSEILVIVSEQEWFSSTGL  
LVMIFNSALSYSKASEIVMLRSRFAILNKQIRFLNQYLRLKPEGRISNRRVVISFSKICYLH  
QHLSKSVKLFNEVFGVSLLVLFVNSFLSIVLALFRTAELQASQIKWTRIAYMALASVPFIF  
DSIHLCDVCYSTIGTVSWCELNFDWSSQVSKAGELIHQIQTEDHDIIDEIEMFSLQIANEQV  
EFNAAGFFPINYTLVFSVRSVQVERI

>TcasGr39 (AM292360)

MRNDHGSNTHLHPDDAIRRAKIVKVAASPTSANPDEEPDPELLDRYDNFYQTTKSLLVLFQI  
MGVMPIERSGKGRITFRWLSSTSIYAYFIFGAETIFVTMVFKERLYLILRPGKRFDEYIYGI  
IFLSILIPHFLLPVAAWTNGTEVAKFKNMWTRFQLKYYQVTGTPIFHNLTILITYSLCVISW  
AVGIGIMLAQYYLQADMLLWHTFGYYHILAMLNCLCSLWF INCTAKGRVAVWMCNNLHKALE  
SRNPAKILGAYRDLWVDLSHMMQQLGKAYSMSMYCLLILLTTIVASYGSVTEIMDQGISF  
KEAGLFMIAFYCMTLLYIICNEGHATKMGPEFRERLLNVNLSAVDQKTRQEVHMFMAIE  
KNPPIMNLNGYANVNRKLISSVTISIATYLVMLMQFRLTLMRNAQLAARRAIAN

>TcasGr40 (AM292361)

MVFAELWKKIRNRGTPPKFELPTTHNCLKKVLVLLSQIVGVFPLNHLNNEEPEKLHFTFKSWKV  
LYTSLTSFGYLFcasLSFYKAFKIGILLNQLITPLFFFHSFMTSVLFSQVASRWPLFLNEWT  
KIEINLLKHYQSTTDLHKKIRYSAFGMIFVALLEHCFMSMLNYVYSSKCENNSTGVEHFFKKQ  
FHYIFTYMPYNIVFGLCLTTFGLLPVNGVTSEKCNLTFWYSKQVYFSKIIISGSIFMTTTS  
FYRILNSGYNLTFGSFIFNANSAIEGIIFFNLAKSWPQLIEKWSRVEMALDNWKNKSLKR  
KFYLTICTIMSAAAVEHILSIVNTCSQIPSEVEDKYTTYFLNTYPHLNFNFEFSVPLAIFAV  
V

>TcasGr41 (AM292362)

MIEVGKTRVKRASNLFRFGQFCAICVPKITSTNNEVPRWYICYTIGVITIGCLCIWSIFN  
KWNQFRSYSNFSVFLFDIITIVTLTSTILLSILVNAVVFVKEKRIRTLIKLSEIKENTRLAEK  
QARISILELVAVHLVLAFLYSFDLDFANGITFGWHTYIFDVPNFVNEYVQAIEVLYICSYTVL  
IRNKISNLNTSLIHSTHLNGDIVKEHQNLHNKICNLIDEFNECFGLQILGILFVGVYITTYT  
IFLLIFGSGSATPENNVSVVYVLILYILESLLYMTKLVVVTFLKFIKKIQIFGIMITKAC  
MSASNLIQRTPNICYKLLSNLGI FPKTTNEQLLRKELLLFAEQMGQRQVAFKVGGLNIDYG  
TLYSLFGSTAMNVIILLQFQKQKYN

>TcasGr71 (AM292363)

MTDHNLLRLIVTIGEFFAMTPSRPKTRAKIYALCVVTALVTPSALSIIYYRQPIYAKISETK  
SIVAMVMGTIVNAFSCYTVLAPVLCKRQQYCQLMSKLLGNHQLVYNCHTFGRFLAPNLTYLL  
VALYSGYVWTDILGFGYFREYLAEAVQLYFQFYTYFVLCVIVCIFRGKYRNINLLLTEQLQN  
RRFFAKKMEGLVCSIKELNMI FNEFFGWPIIMIIYSSLMVLNYIDEVFNFFGYDKKQYIG  
VVVANVGVAFMINVGTVTLILSCDAVLEEVTLLLAYKIRQVFPNEKKNISEFINVVLNNY  
PDFSAAGFFSINKTLLQIIGNVTTFFIIIIQFNKX

>TcasGr43 (AM292364)

MDFQLLQIMFTIGKFFALTPRSILEKQTFIQKFYAVAFFLALSIGVVVSIYSKSFHRNEIH  
IKIVLMFFKEASLYCFNYVIVVTTFYKRRTWTRLLKNLESCAKIKKTKRYCYYYAFFGVH  
LAYGVVVIYSICVQTEKSVDFLCRHTVEYFQNYIHFYQLLLYLITDMILMRYKELNRVIL  
DNMSRNHLFLVRRTETLAQILNQT VNFYNSAFGWPIAFLIFFATLDFLDNVDTIMYEKTNVT  
FVHLAVLNILRVGKNFVCLLSLII LCDCVVKEAQKSLVLT YEMRWYCQTATMEEKQELYEFS  
NFVSQLPKFSAANFFDIERSTILSVLGTACTFLIIIVQFRNS

>TcasGr44 (AM292365)

MTRAMVRPELDLNSLKCITKVLTI LGLLSCSFPKKKLVYCIIFGAIATLTCIEGLRDCPRKY  
STPLAKITITILQRYCSVLLVFLTYFFNIFRKKLLNAVKILSKIDETLNSKPLKPVKIRTKV  
YLVCSSALVLAAMTTFHLIYEAHGFSYKCGIQYHICNTVISATVCFMMLLMLEIWRRTIL  
NNYLTIVLGETWTSLSVYHLVEISEIHFDLQAADDLNRYFEVQVLTIFGVSYFFISTFFY  
FFTTGNI IATYDKQFYIHNALIVRALFLFFQLWATVYTSSQVTREVQSRSNRMTPLKLQPQN  
FSI

>TcasGr45 (AM292366)

MCYFNYSKDIRSLSFYKICNIFGIVPPYSFEKPDSQKSLWKKIQGVVLVSI IAAGTAYSI  
YVRHTYYRRLYTITHLVLDYLDEFILVALAFQVILNSCFCDPAKWIRLNNLQYIDEVLKNR  
DSHETNLLRNVSQFFVYVILYILATVFLAYVVICEMGVVTLQAYTLHLFCVLYVLLHFLT  
YNLSLGIKLRYYDDVNNLFRIESEEKNIIVSLRQIGSLSQLLSETVALFNDVFGTCLILITG  
KSIVQLLTCLNFITNNLKSENEEFKEKLLAANLCLVIYTLVSVSLVMVTCDACTIASKQTIS  
WCYKLOEQFVTNSEVRTELFKLAQHVSANIVHITAGNYFEINKATLCGIFGTTTTYFIVILQ  
FNQSSAK

>TcasGr46 (AM292367)

MEEKLVVEKFLNSLQIYLQHNQIFGFVTFCTRSNFRSSKLLILYNIILQVLFVVSFVSYWLY  
LVLEADDMLPIYKNTYLIILFADFAYLETTWICTLLKDKLLELFKRLIHFDTKCQENSTVI  
DYKRHKRLLCYLLARYVALALVILFSEILVIVSEQEWFSSTGLLVMIFNSALS YKASEIVV  
MLRSRFAILNKQIRFLNQYLRKPEGRISNRRVVISFSKICYLHQHLSKSVKLFNEVFGVSL  
LVLFGNSFLSIVLALFRTA AELQASQIKWTR IAYMALASVPFIFDSIHLCDVCYSTIGTVSK  
AGELIHQIQTEDHDIIDEIEMFSLQIANEQVEFNAAGFFPINYTLVFSVLKQYVMQQQVKNF  
RHSVRSVFFLSEIFGLVNLKYRETYFRLSKTKTFCTLVTALVYCSLAI FVLCCELLIEGTTSI  
LINVPSLI IHVSTSAYVATVWINSVINRWKFI EFIRKVLEFDVKCVSNYTKQQSKIH LIVRS  
VFVTTYLMFDYCTVLRVQRFNNYQSLAHYLRVFFTVFNVVHCYLA SELVLMKRNRFVTLNVQ  
LTKLTKNCATKAQSVVLGRIC TLHHHLSKLVTRFNEIFGLGLLLMFGVSFLLITQTFIICV  
IVQSEQIAWLHLLYIFLVGIMYAADVFI CHVCCSTIHEVSKAGELIHKIETNDHEIIDKIE  
MFSLQILNERAGFSAAGFFPIDYSLVFSETKLLLFKITSVMIAVSGLVYIATVWICTLMNRC  
KFSEFMTKLEFDVKLQSDRLMIDYKTQKTGSKIH L FVKCVFLMGYQIFDWVQKEQSLASHV  
GVFLTIFNAAHCYLATELVLMKRNRYIILNGLIKMETKAQSVALGKICTLHHHLSKLI RLF  
NEIFGHGLLLMFGISFLLVTQTIFALCVVLQQLQENDWLQGLYLI FVSTLYTANVVCICHVCY  
STIQEVSKSGELIHKIATNDHEIIDKIE MFSLQILNERAGFTAAGFFPIDYTSAFSSEKIVW

LHLVYISFLGIICAADVFIICHVCYATIQEVRAKIYFFYLVKFYKVSXSGELIHKIETNEHE  
IIDKIEMFSLQILNERAEFNAAGFFPIDYTLVFSKFTSSIRMLLIQGQIFGLITFGCSNRCF  
FPSKIRICWNVLLNVCVYFLFCGFCVYEFASDERIKLVKAIIMILSGCIIFTEGIWICSLI  
HRKKIVKFLDGIMAFDIQLKQVVNYKKKKFQRMVVARVYVYATIFTIITATSSFVTIHNVI  
QFLGYFIGLITFVMSQHCVELVSMIKARFVVVNQQIGGIVTYFSTNLPKRETEVRKSLDFG  
KLCSLHHHLSKLIKSFNEIYGVPLLLFFGLNFLIITQAMFLVVGQLQASQIHWQKIIIIIVMS  
SVTYGIDTVAVCDACYSTIEEKNLQVNESGKLIHKIDAQDCDFVDEIEMFSMFERFHVNKLH  
FLLQIIGGVTTYIIILIQLSASLKQ

>TcasGr47 (AM292354)

MDLEVLEIYFTVANKFSGKLWPI SIVLIYTVGVVYSFKRRIFYQDESPISRLVYIGTDLSYF  
ISNVYQILAYNFWKKKYWSEFLANLKLKGRKIRKNLYLLEFVINVLYVLTLCYAVVYWRQ  
QYEDFWHRYTLSFIENYCQFLYNCFHSTLLMILSRYQRLKAQLWQNRVETVAHGTVQKTT  
LFFFNRFTGVP IFLVLVVFVQMOSVQDLSDIFYYKDTAQLVSLALLMQLTQLVPALFVIYLCG  
RVMEEQNKIRLITFEMNKSFERDKNKLGDFVALIRDAQVKITAADFFILDKSTILKVLDTVV  
AFLMVVAQFQD

>TcasGr48 (AM292369)

MHTLQHFTIDTRSTHSMKNFKYLKVLVTFAHFICLFPITINIRKNGLNYNFTKKCYFLRMVL  
IDLLIVGCILKHIFNILMKNVTLNDVVFIFCSAPIIITILDIEILGYVNKAKFGKLLINLYT  
INYNFKESERNDYVSLQLVVFVFCYFIYLFVYIYYSVHEASINFGYTLAKFMIFTSTCI  
YTNLLRIIEADFSKLNHLLSGTENLDLVLPIYSQLVFMCKKINKLYGHQLLLTILTYLIWTI  
YEMYHLAILWSCTSTNCPFLIMLALS YTVIQEVMLEF TILWNCQNRVASEDFKAIWYSILI  
KKADSFCCKKLENYSLQLINHRVFTAMGLYVLNMEHFFSVKCSIQSESLNDILFPVAGFI  
SDFDCDINSIQYFCLMARCLNTLIFYHYHISTYEYSI

>TcasGr49 (AM292370)

MCQIKNKL LLLDSSTQPNYLILSNKNNTYLVLNKYLLVKHSPKMP LLPKTPPLPLTLLYKLL  
GIIQFPISAHFSFMSRFLCLPFYSYFFYLSYIYTTYSRKLSGIFKYIDQMAGYTGFLAMLTS  
MVMFYKRSNDLKTLLSNLESIQIYSIKPKERNNSHWVRSGLFALITGNVLFYFPFLPSDVSYN  
LFSFVPLVNALDHLFLNDILSDICDKFEQINQHFRRQIKSVDLFVIFPLTKAEKVRNLKED  
EVTFSVQKIQELSHLHYKLANFTVKISGLFEITITAMVMWFGYVIDTMYLFIHIRSRQEDT  
DTLVVIYTFNLFYLCFCFYWLLVMVAMFSRTQQSANKTATFVHEIWNKYALKNEVDKRVRLH  
QLVAIRLLNNTKLQFTAKDFFNLDWTFCHMVSHKWLNYINQFEANFR

>TcasGr50 (AM292371)

MSLYSSINSLVLISKIFALLPVKHHRLEKLVPCVYLTFSFVLSLGSFIVSVYLTTKIDND  
GESISLASGWL DLYLGITIQTLGII SN CINAKQITIFFDKIQRIDKQFGLLGSIN YRRISI  
FVNLAAILGVFGEFVLVFPDYVFFVENEPILYLIFSYCPIVTTGIIKIQFATCAHLILQRVN  
HVKKILEKETQTVAFPKDNHFLALLDIVHG VHNELCNLCQVANSIYGFQNFLFVLSTFSICI  
TQFYCYDSGFNSDNLTDVYFTLQWAF LQILEILALAYLCDKVQLKIGEIKYSVNKLIFRSN  
DPKVTLELCGMISTYLIIMIQLDLARTVPKFKENKNKETE Q

>TcasGr51 (AM292372)

MNMILKLSLKDIVFINPLVKYLNIFFITPWFYDFPTNQKYYPSLAKCYACLLMVVKILWVIYW  
LQDDALKSVYASLLCTEKIFLFAIYTNLSILTTVTIFKSAFWDVDKWRTLFTNLQYIDINLQ  
NKGKESKLMKNFYFWFVLKQVMFLCYSTYGIQVFGTMQRTSFFKTF LNSCLMDVYEFLLI  
SLINILIRSFKSRKDLNQLKETACEQSKSVEELMNIANYRILGDTVEIFNSLFGYQIILV  
IFDCCLETVSALNGAFLYTINGQGQFNIE MF LCNMSLLTVIPIHVWTSKEKISFLRGFWLSP  
AVDMFYEFQIIELMTSVVKSLERSYADLNENFLQCQDEKFESFVYYHRILGETVDLNSLFG  
YQTLITFHIGSQLVLHTVKTVLKTTMSTFSDITFMRTVWKFFNIFLITPFYFNENTIH  
LCKLYATFLIALKLVWIVALFKNENLSEMVKQFLFTQKFTFVAGLATLSVLNLLSVIKSSFL  
DINTWKMLVKSFDAIDSKLQTGGKVETSICKNFCFGFITKQLIFMIFVTYQLYCWSSFLKIS  
VLQSLWASPTCDLMEYEFQIFTF LMSLLQSIKRRYVLLNEKVEAIKTS PKMRHELQKLAQVYR  
ILGETIETWNKLFYQILLITFQSGLNVVSCINFLGVLDRGNFDIEIALCNGIFLLLTLS  
LLQMVISMDSTVEEAKTFVDRCYKMQEQFTLNFRNSDELIFISIAKHNVRTFSAGGFFDIR  
KNLIFSLIANVAMYFVVISVQFNQNKQKE

>TcasGr52 (AM292375)



MQDSFQYINRSELITSKIVSFVNSIFLVMASVTIILSSLI FNQE QWSSLNKNFQFIDKKLNN  
RNSKSRV FYENVNFQFGSILALFGVVQIYIFSGFIVPSGVVYKIGYWLHQICHICELHTIFL  
VCNVLT VFKIRYKDLNKALESSKISVGLIRD TAVLYRLLADNVANFNKIFGWSLIFLFGRIV  
LQLLSSLGFLLYASKKQFTFEETF AI IHL SVFVYTLVSVILI IMGCDVVASNSRKTAE MCKY  
LQGFY PEEAPQRKELLRFASESRG SVAKFTAADFFEIDRGTFFGILSTTTTSYFIIMI QFNMS  
L

>TcasGr53 (AM292383)

MLKWVLKVG NVLAMP TPTKEKRFP HRIHSYFMVAFYVVFSSVSTFFKIPFYSTLRP INLLVQI  
ILDVILLILNVHTILTITTKRNQWCKLLENLKLDR ENNSSFVANVLFQLIHVYYTVVFTLL  
LGVDVFKEYAFEYIQLYSQFILYFLLFATL KILLGKYTQLKACLMEEK RPMVSLQVIKAQIY  
SLRETVDVFN DIFGWPFLLLITFTSLQIMVYLQHIFVKS RPSPATIISNVTVISWQAVCTFY  
NILLCDSVAHTAGELLGAVYSLDLELKH IENFNDFVTALKDNVPVFAAARFYAINRSTIFRM  
FNAIVTFLI

>TcasGr54 (AM292373)

MSFKLLRLVLKVG HFFAITPGFRKNRTTCPEKIYAYGVVAFITLGVA VSVFYRAKDYAKFIH  
IKAVVQITLDATLYVQNIYTVLTALTKKPLWFKLLK NLKMVQNHNNIREKSHYCLFVASNCF  
FWSYQSYMSYIFANIMGLEFYKQFAIEYFQMYVLFVNF AAFVVKMLLVRYRNLTKQLRFK  
LRF FEKLG NRRLGFVQR LDQIQFDICLLKEGVDLVNDIFGWQILFLITYATLQILVYLHLAV  
MLGFQDIYMIVYIIVVIFWYTVNASTNIFLCDEICNEGQ TILGISYSLEKKTGDEIQDLIS  
TIKDNFPRFYAARFFVINRGTILGILD AIVTFLIVMIQFEMTQNSTNINL

>TcasGr125 (AM292376)

MIKFSKVKS YFTTHD TLHNIY TSMKPVYAICKLIGLNTLRIGRKGELKQHKSDYFYFSFYI  
TSYTL LSVYSLFRIATNENNSLVINKRLIFIECFVMMAL TLIVTLFTFLARGTLIKSFDMLS  
HVDVSFIKAGFRLEYKQLLKR SYLIIISFVLF SLLARVPVMLMTISADFIQQIMLFVSALIKA  
FSKYQFVVLVLQLQHRFGKINRTMRSFFSDNKQDDKIPQISDNLYILCRLHYKLT SVMQKIN  
SAFSVQLLVSIGVSLFDVLFQAYLYYVATGKASFVTVPMIVCPIVWLMDEVVEIYLLVYAC  
ASTCEQANDTPSILHEL RNNYFHMDLENNVQSYSLQLLHQKVQFSVLGFFVVDYTL LYSIVG  
AVTTYLVIFIQFDQSSNSRNNYVLTNNSTC

>TcasGr56 (AM292377)

MLPKQFLKLFKDP CDVYTAIHPLFYVCTFFGLAPYSLVRVENGKKVFKFAWWPLTRNALLVL  
ILLGALTYHAI FDLISFKDSDLQOKLRYFEEVFSSLLSCCSVIFGCIFALKVIEVFKNIEEV  
DVAFRSLAVWVPYKHLVYVNI IHL SGLVTIVATLTVTIIFFASYQYGT KTYSLFIVFMTVIL  
PYFINLLMELQYCHYLNILRVRYQLLNEYLETLVQETNRTSVEGWTDVSNV KRKSKEISKLP  
KSMLAISDPVFIVDQVAALHIKLTDTAHMINYAF CVQQLLRITVAFISIVTALFLVAINFNK  
SSSEENEGKTTQLDYFFTFWAFSNACEVMAI VWITSETCEEVSKKCYK

>TcasGr57 (AM292378)

MKEVPGWLT PPHSLGNTVTPVSLRFLYTI VHFIIIALYAHSSYGRENF IYGSMMNTVAIT  
DKIANFMLTFFNVSLRIILVFSKGKVIKSFFNQGYELSKQEIFNCCSKKSFRMNF AIFNLYM  
VLLLLFDAYLWISSVGV RMFQYYIGRSFTYYVCNTTIFLIFHSVLP IKRFFTS LGIAFDNIM  
KNLICEIDGRHEFFLAEFKSAKTPPNKLCYDLRRVRKNYNSICELVDAFN NIYGLAMLEII  
IVVITYVNLNLTDLFLVYGMSKSRNIEGVSFGTNLVILCALWIT TLLLFTILLAYGCAGATSE  
AEKIAKICFYWLNEIPTMPVSIKDQTIKEELALLAQQSTSR TSKFSAAGFFPVDF TLLGFIF  
GSVTSYIIISIQFIE

>TcasGr98 (AM292379)

MSYRLSRNDIRFLKVMYKLSHFLSITPNYDFENFVIISPRCDKISAI CPLLSTILGTCWIIY  
VRIYCKEIRFFEISFEILGSLDSLILLMVLVSIILGSLKTKEWAKLNNKFQYIDEK LKTRDQ  
KERNLFKNAYFQLVLSISVYSSSVGYTQYVRIAAGLPTLKL FALHEFYGF CYLWVLILICN  
IALAFKQRYQLINEQMAVRINPKNCASFVIEVRKLSRLLGEMVGLFNDIFGWPLVFITGRFV  
IKILVALNFFTSTLEIDNLYLKHKLEISSLVQTAITLVAMCGLVLICDSAKSESQQT VFLCY  
KLMEKFPERSHEQQELYMAAQVIEKSVANFTAAGFFDVKRSTLFGILATTTTYLIVTIQFNQ  
GLNK

>TcasGr59 (AM292380)



>TcasOr3 (AM689905)

MSKSEKIHTLATYFDSNIAFLKLTAFWIYDDETTTRRKKYLQHAYNIFWIFYL FVAYQPAELL  
YVYYSFNDSLVSFLRALRDIGNHVS LAYKAFNYFIMRRDILKLMETLQHGNHYHEDCGDFQPK  
LIVDEEKKEALKWTKYFLNFCNAICLSMFANGVFTFFIFLSDKQYVERNGQRVYHQEQPVNTV  
SPFGSGTKLRFFVTFIYTMIALTFYAWTIVALDSLFITIMSCISSHLKILQGAFKTVRARCI  
MRTRAERLLKEETLHDPPFLENCVNKEMIRKLES IYSTQTFVQTFISLGEMCFSLYLLSETA  
DQNIGNEITYLIATGFELLMYCWFNGR ITEASLKISYALYESDWFPTSLSFKKQIIFTMTRM  
QKPINVTIGKITPLAFSTFLTIARGAYSFFTF LKQRHGINH

>TcasOr4 (AM689906)

MDEEFLIGTFETEKKFLRYGSFYPCGKRIKFIFLGLFMFVYSWTEFLSMITVLFVERDNLTK  
LSETLLFCMTQAAFLFKLVNFLYHNKTMLRIESILKNPILNCLDQFEKNIIEKYMIRVKYLA  
RLFRILCILTVSFYGLFPFIDEDPDHMLPLPGWFPFDVKTHQIELVIAQTCGIAIGAFLNST  
LDILPTILITLGSAQFDILKIRLENITSVDTSKSWLVKKAIKKCVIYHTILLKKIFYGFELW  
QIKPKIDSCKFIAKIFRILCILVVLFYTLVPYLDDEKEDLSLPLPGWLPYNTKKYYPTVIFQ  
VMSVSVSAYNNSSIDVLTCLMITVASAEFNLLKGALKTIDFHPKGHNTKQLIEAKFENCVNH  
HKEIVK

>TcasOr5 (AM689907)

MVWSPKDVDYDLTLPILPAWKYFGLPAYKIIKTPNFKSLTHNNSKLNIMV IISTTAYLYYFK  
VGDKNTNSFEKHMTMYRLVASFVNYMGAVIFCHKHKNKFLSNIIEKCALLQQRNLKLGKKEHS  
FNKMAKILLTIYTTKLSSMIVVTVNDIVKISTSESHSTVKLGWYCNFITEMFLFYFLIVLRS  
LYSQLLNCTKFKE SAQQVKELGKIHKDLNKLAMEVNETFGELMLLRFSGDFIYLIIVGLSSNA  
VLNAEYETVLDVFWTFTVYVLWIPMALGFIALTVWYFEDILHHVGLQLVIL

>TcasOr6 (AM689908)

MSPHDSGTFARIRKIFSILVYTSTVVLSMAELFFNYKDLETVIRATESFFTQYGLAWKIAVF  
VVYKTELAQIIRLCDNLWPLDEFGTGHNFQFLHKFLRRFFLLYTGNLALLCTQFAVTAFFDD  
QFKSVMVYGEKESRSQIYDNFVFTLQVIYLYVGCFFVAGFDCFFFYLLGHAVTELKMLTIS  
FSCKEIGRNWGYEERFKCSVKHHIHVLELLDKINKVYSVMLLNQHLCSL FVQLTQVMDKVEF  
SDPLFFLNIVIGMHPFKADKFSKFR LAFSIAVYFAVIFSGVLELIVNSQGLETYARASDTLIP  
QCQLVCKIFVLAKYKKQIARLLNGSQRFWDLGQFGARYGNSFGKTHKYLKSFLLYKVMLTF  
TCLQFLAVKIIIFKIPKPIAISFGETKGLEPLYDHLVVLHAMITLVTINLVNGFDGLFFFYFI  
GHVLTELKMKVAVFGDSP IETNWSEEKRFKFAVRHHRFVLE

>TcasOr7 (AM689909)

MYRLVASFVNYMGAESAQQVKELGKIHKDLNKLAMEVNETFGELMLLRFSGDFIYLIIVGLSS  
NAVLNAEYETVLDVFWTFTVYVLWIPMALGFIALTVWYFEDILHHDARINENLTNLI EATKQ  
DYIFRYCFYTGFFVYFYGASDFTILVLI TPVEKLYGHFLNNLENHNLEESVRVFFMLQDLAOST  
FNIIEEFMLAKILIDFFYASTDVFYGTASALEVQTSLLATVLSFIVVLWLLFV VHSIVTIS  
FVFGKVKEQHQVMNEIICERFRSKAAKNYRCEAKLLLRGKVNPLKFTICGFLPLDYCLAYTV  
S

>TcasOr63 (AM689910)

MGFMIQDYDLRNASL ERKLMVVGFPYKRDNKHEILYWLSAFFNLLISYGQLTTMIIQMVF  
DRSDLSKLTESLLYFFTHFTFLCKLLNFQYYSKD LIEIENFLTDPIFYGYSFEQLDIKAKI  
RSCAFISNAFRICCTFTCSFYCLVPPIDESRKKILPLPGWFPYD TTNYYYSTFFVQSLSLFI  
SAYCNTAIDILTWKLITLASAQFEILKENLTKIDYEGGFNETKGALVRCITHHAKIVNYTER  
VEAIFSKGIFLQFGSVIVICTTGFQLIVVPIPSVQFAVLGTYLCG MTTQVATYCYYGHEVM  
TTSDAIGMSLYLSN WYASHVKIRKIVMIFLEKTKKPTIVKAGNFITL SLATLTQILRSAYS  
FAVLQRLYKDS

>TcasOr9 (AM689911)

MEKSSKLSDKFVYFYT FNCIASSLMPMIASLLGGNKNLPMVWVYPYDPNKTPYFHLTYIWEI  
FCISNLGLIYAVLDLVFP CIAIVLGQQFKILASNFKNNVYRALVDSEVSEKIVQTF SKNLHN  
DSFNEEIFEIMNSAKFKNNARYLRKNVKHHQQLLQYCADVSDILSIFLMGKVSAAIFNTLF  
MAFSLITGNRAMIFGLGSYMVSTSI ELLIYTYSGQVLTQNA DIVGTLYESPWYMCDVHFQR  
TFHIVQMRASKIVNVKAGNYFTMSASSYITFMKSLGIVYSALEGVN

>TcasOr10 (AM689912)

MATFLLYKTEMLDLIKKSERFWKLDLRFQAKNLHSTYPIFQIFFYVYVILFLTFCAMFAL  
VNWIFDTGKPIISLCYGESEGLETPWVEFYIVLQSVETIIFLGITGYDMVFLYYAGSVCIQF  
QMLKMAFAERKMNERQFLKAVKHHEFLQYVEQLGDIYSMWFLQYFSSFLGICFGLFLISK  
EGLPTEPERLSKYFPYIFSFTMQSFTFCMTGTMLSDWSSEISDEIFHSDWSDQVYKNKTAR  
LIVMNRAQRPAKISIGKFLDLNLRSFILSLDISNVIFYVDWLDDEVYKSKTARLVIMNKAQS  
PVKLTIGKFTGMDLRTFLLV

>TcasOr11 (AM689913)

MGKVKFTEPLEFLNVVGLNPENCSNFSLFRRVISLGFVFLVITLGLLELLHFEGLTCSRA  
SEAMIVQYQLFIKIAVLLKHRKNLVVLMQKTRKFWPLDKFGQDAKIERPHKLLKAFFAYKL  
IMILMALQYILRKFVSKNGKPLAIAFGESKGLSPKVDHLYFVLHSTSTFVVLHAVTGFDRLF  
FFLIGHVLTTELKLVKKSRYRLTQNRREKFLQVHHAFALEIPDLGHVTKYVPYVISFITQT  
FTFCFIGSLLITWSLQVPDAIFYNDWGKNQAYKYKTDKIIAMIRGQRAAKLTLGGFGDLDE  
SFNLVVKNAFSFFTFVNAMNQK

>TcasOr12 (AM689914)

MAHNLDVDLTEFVRFNIKCIQFFGYFSPDFRNSQRKLLFRIYAALFVGFILSLLSQIAN  
MVDAFGDIEKMTEASFLFTNLVQCCKIYTFANHGKKVWNLVYSMNRSDFKPNNLAQYWIIV  
NEIKTSKIIISKLFLACTLTCVSWAISPLLDKRGSDDELRLPLSGWYPFSTEKSPAFAFYTY  
QIFTTWVGGLGDISMDTFMSGTIMVISTQLSLLKDGLENVARNIKHDKSSVNKNLIQCACHY  
RSIIQFAAEVTNLFTTCITAQFVVGVIIVCMSMFQMSLVSVLSFQFAAMLLYQICVLMETYL  
WCFYGNVMLKSDQLTQAAYMSEWLDGTEEFKQNLFLMTRTQFPLKLYASGGKVTQSYLLN  
LE

>TcasOr13 (AM689915)

MSAMSTVIVSGEMFDLFSPLVLYLSRIFCLQPLKWIKTDSYVVISKSGPYMAYSILTSFLIT  
ASIIYGLTQVYSMEAVYLIRLSSNTDRFVTFSDVVVVLIPCIIGVPIASHNIEKTIKYFSFLR  
QFDCCLOKQPPKTKWSFFVPIITIVFTATILLFDVAVMWLTLIARNQSIFILSLPYVVCYCF  
MIIIEIMFWQFVNSIKIRLILLNERLEQIGGEDFTIVRIDRKKINSIVDTLKVKKKQAKCGV  
TNEQVRDLIIAYQKLTDAANLVNDSFGLLILIVISGCLVHLLATPYALYAIIFTTGNMTMFI  
TQSIWMTGHVLRLLLIVEPCHGCILVAKTTTQLVCKLLCLDLKKEVKKSLEFFMTYLAECQI  
RFTAYGFTKLHRGLLTTITGAVTTYLVILFQFN

>TcasOr56 (AM689916)

MTATKSLKEIPPIYLRVHLTVLQILGIDILPVESVPQNLFYTYTALIISTMCLFTIAEFLDM  
VLNYEDIYRLTFGLCYCVTHVLGTVMFLMLYLRKKLWGNLTTLEEGIFKPNPTRGGPEELQ  
IVNDAITMCNRQGYVYFVTLVFLIIGARLLYASLANWPYDKHNYFDGNVTIVNTKEMPYTTW  
MPFDYNDSPLYETIFAFQIFSTTVYGFYIGAADAVICGFMMLIKAQFLIVKRELETLIERAQ  
KAAIAENPDNEDNFGREIERIELLDKRTQDYVAKYANECVYHHQELIALCDHAEEDFCYLML  
LQFISLLIVCFQLFQVSTLSPDSVEFFSMVCYLLMLFQLLCYCWGNEVQIVSGELSRYA  
FGINWIIMRESPKTLMLMMRAQRPCYFTAGKFSLLSLQTFMTIVRGAGSYFMFLRQMNII

>TcasOr15 (AM689917)

MSKNLKEIPVYLVHLTVLQILGIDILPNERIPQTLFYTYSVLLIATMVVFTTAECLDLVL  
NYEDIYKLTFLGLCCCVTHVLGAAKMFMLYLRKKLWGYFTTLENGIFKPNPCRGGAEFEIV  
TSAINMCKRQGYVYVTLVGVGTGGQGLYAALANLPYDKHNYFDGNVTVVVNTKQMPYATWTP  
FDYNDSPLYEIMFAFQIFSTTLYGFYIGAADAVICGFLMLIKAQFLIVKRELETLIVERAQR  
GNPDRGDFGGINRIEMLDGTVFVEKCANECVYHHQELIALCEHAEEDFCYLMLLQFIS  
LLIVCFQLFQLSTVVRGAGSYFMFLKQMNII

>TcasOr16 (AM689918)

MMKFKVTGLVADLMPNIRLIQASGHFMLNYHADNSGALHTLRLGYCCMHLVFLVQYGCNFV  
NLVLERGDVNDLAANTITVLFVTHCVTKFVYFAVRSKLFYRTLGIWNQPNSHPLFVESNNRY  
HGIALKKMRLLYIIIIWTSFSAIAWTGITFVGDVSVHNKDPENENLTITEPIPRLLVKAWY  
PWDAMSGMPYIITLVFQIYVFFSLAHANLLDSLFCSWLIFACEQLQHLKEIMKPLMELSAT  
LDTYVPKSADLFRAPSATSQDQLIENDYNEKNEDLKGVYSTRQELGGHFRGGALQNFSGGV  
GPNGLTKKQELMVRSAIKYWVERHKHVRLVTAIGDAYGVALLHMLTSTIMLTLAYQATK  
ITGVDKYAATVLGYLLFALAQVFHFCIFGNRLIEESSVMEAAYSCHWYDGSSEAKTFVQIV  
CQQCQKAMSISGAKFFTISLDLFAVVLGAVVTFYFMVLVQLK

>TcasOr17 (AM689919)

MSNFSWKA AVETNITTLKILGLWPKGDETYKLN FYTLYAVFGVIGLLCAHSFVQIFNIYFIV  
DDLEAFTSSIFVTL SCLGTVAKYTYLLQNMQMLKELFISINKDIFQPKNNKQILLVEPSIKF  
WQRFYLIFRVLCYCTTFWSSYPILDKWTKDHRLPFLAWYPYDSTKSPFYELTYIHQVVSIV  
YLV SASLNI DMLIAALNMFVGAQC DLLCDNLRNIGQNSKEIGKNLVKCI EHHREILR

>TcasOr18 (AM689920)

MAKLEYLTGATFTL KCAVLYPIDSNPKIKKILYAVWAIFFILTFVTGFIQCFVFCINPFD  
LVQEAMIIMSLV FYKNWQNMVALVTNINKNFHRATDNVIEKISMDQASELSDKLAYVWTSSL  
AVGSVVPVVLAIATGNLEMPMPAWFPYDYNKSPVFEITYLWQVFC LITLAIY GASDMFFPC  
ITIIIGQQFKILASNFKNFYTS LIKLGAEESIVQNF SKDIKTHEFRSFYIKYGNIFKILNN  
AKFQTLNRAFLKRN I KHHKLLLRFCEDLNKI LN TFLLRVSAIVFNLI FIFGNIIISTDRTL  
MLGFCNYFCFGSTELFIHTYSGQIL TENADFLWTLYECPWYLC DVTYQKMLILVQMRVKRMV  
STKAGNFFTMIAPS FIAFQRAVFSYITLLKEVTDLGKD

>TcasOr19 (AM689921)

MVLLPTDFGRFRHHPH IRSAGFDAPLEAMEEGMDI SEDLGIFAAIIGLVTMMVLYVVKQKDL  
SSLLQDL SNFEKFGKPPNFDKVNKRLDFLVKFVFSY AIFGAVVYNLMRIIEIPHCKRNKIR  
EVCGVFVPLWTFDADYPPVLVLVASVVFIVVILIDKV TLLVSLQVLEISCHIRLRIEQLNA  
MILNCFNGDLQSSRKRLNDCVQYHIDIISYSERFNNCF TNGMFIHLATTGIIIGCLENQNV  
GATPGGVLHLFGWIIISLFTSCLAGQILLDSSTSVADALYNSQWYTADV KLRKNLILMIQRSQ  
KPLFLATGAFNIMS FALFVTV

>TcasOr20 (AM689922)

MMDETYLQFFVKSFTYLNMLPEKTTFTCTTIQQYYVSVIITITTFPILADLVSQFYEESISFT  
SVNENFVALSALFAVIYVSVCFINRKHKIRALIADLALFETFSSKAVITETDKSVK FYTKLF  
IVYGIVGNLCYGLLPILGYKKCHESKSVHMTRYGIPCGLVVRFLFPFKFDYSPLAELVALYE  
ILVCILGTSVVI VTTLICGVLIHITVQLQCLRKII LDLSQVNDLEI LEHKMKFCVKYHTAI  
LDYGIRTDLAFNQMMLLHITWTGFIISVLGFEISTDDYVEAFRFFMHLLGWLGMFLVVCYY  
GQKILDESLAIADAVYTF L WYKKSIVVQRYVLLILLRSQKPLTLRACGVKVM SLATFLGVLY  
SAYSYFTLLLKLP

>TcasOr21 (AM689923)

MEKYDWMQA IKTNILILKIVGLWPDSEDYKFD FYALHASVWLSTLLVASTFFQGINIIFILD  
DVKALTGTAYVLLTEILAVIKTYFVVKNMKMLKHLMQSLN NNKLFQPRSHEQIKLIQPSLKF  
WKL LYNLFHSLVGGATLFWILFPIVDKKEKRLPFLGWYIVDTKVSPYIEIVYGFQFCSCCYM  
SALIINIDTLIAALNVYIGNQIDILCNLRNLKAGCSI ERDLITCIKHHQEILK

>TcasOr22 (AM689924)

MAKDSSPVLQESIEIMKYLQLWPQNEHTNLR RRF CFVILLCSPLTLGLAAHLIVCIKDNLDV  
ELSANIAVLSAVTGLTYMLIVFVWSQDKVHLLAKLGTHEIFGTPDNFKKRSRRLDFYAKLY  
SYYCYFGI VIYSLQI IEMPECRKINEEKGLSEICGMIVPFWAPFDIDWFPLKQIFWFDQLL  
GIYII IKGGA AVSITTFEVAQYICLKIKHLN SLLRQAFDDPHEEVIEKRL LH CIRYQQHIIR  
TNELFNVCYKHCNGCYVVMVGIIIASLLNQI IKVTAPGLKKASELSILQAGFAAFSSAVTR  
VISESLTIPDAALDSKWYEAPIKSQKMLLLL LRSQKAFNLHATPVGIMSFALFVALLKTSY  
SYFTLLHQST

>TcasOr23 (AM689925)

MAKDTSPVLRESIEVMKYLQLWPQNERTNLR RRYFIVIFLCSPLHLGLATHLVVCLKDNLDV  
DLSANIAVLSAVTGLTYMLIVFVWSQDKLVHLLAKLDTHEIFGTPDNLTKR SRRLNFYAKLY  
SYYCYFGI VIYSLVQI IEMPQCRKMNEEKGLSEICGMIVPFWAPFDIDWFPLKQIFWLNQLL  
GIYII IKGGA AVSITTFEVAQYICLKIKHLN RLLREAFDDPCDVVVEQKLLHCIRYQQHIIR  
TNELFNVCFKHCNGCYVVMVGIIIASLLNQILKEKSVGALVHFAGWIC SFFICCHAGQAVIS  
ESLTIPEAALDSHWYEAPVKYKVL LLLL LRSQKAFNLQATPIGIMSF DL

>TcasOr24 (AM689926)

MTEEKQLR ICLSSCFFLKWSFMWPTKSEEFRTSKGLYFRLLAFV IISGLTFTAMIVMHLLKS  
VEAGDYDISEDIAI LATNTGYILMMLLYIIRQKDLESLLVDLSSFKKYQKPPKFDEVNRKLE  
WCTRMVFGYCVFGSVFYNLVKILAI PSCKKSR RINEVCGVAIPYWVWFDTENWSIKLPLILH  
TFLV IIVDKVTLLVSLQVLEIACNIKLR LDQLNCMLVSCFDGDVEASRRRLNECIKYHKEI

ISYSEIFSKCFSEIEMFTHLTTTGIICGCLENQVVQEHPEAILHIGGWITAI FVSSFGGQIL  
IDSSLSVAEAAAYSSAWYEADIMKMSYSILTILQ

>TcasOr25 (AM689927)

MTEEKELRLCLWSCYLLKLSLMWPLKREEFKSSKGLYLRLLVFVIISGSTFTAMIFMHLYKS  
LKVGSYDVSEDLAILASNIGYVLMMTMYVSRQKDLELLLLDLSDFKTYGKPPNFDKVRKRMD  
LYAHLIFFYSMFGSFVYNMDKIILIDKCKEARRINEVCGSAIPFWTPFETEDLFTLTLVITY  
VLINIFVVVKVAMTVSVQVLEISSHINLRIEQLKIFIAGCFDRDFKASRERLDFCIRYHNVI  
IDFSERFSRCFSYVMFIHLAITGIIIGCLENQIVQEHQPEAMLHMGGWSTATFIACYGGQLL  
MDASTSIADefYNCPWYEADV KMRKDLILILRAQKALFVSTGPFNVLSFALFVSLKTSFIW  
PPKNEEMTPSRWFYIKLAVLLTVSVIILYVPVCIHIHKL FERDL DASEDFALMFSYGF LST  
MIFYSKNHKKICGLIYNLCSFEFEGKPPQFDELNQR LDFYSKLASGYTIIGMAVYIGMKIYK  
IPDCKAERGAIQVCGLTVPLLCEQFNEAYYWTAFSHIVCSVLACACVAHQAVNQDVLAVLHY  
IGWIMSIFVVCWAGQILTDSSVTVADACFGSNWLRACPRLRRDLSFMMRRSQKCVELRAGPF  
NVLCFSLFVSPIIITKHICERQNAARHFDDICGLVTNSWMPFDIKKFPNKQLFYLWQTYSVYW  
TYEGSAAISYLIVATMEHVLMRIWHLQGMIQEAINTEDAQVRKSRLDKCLEYHNHVFLLAAD  
VDRIYQRS L FVHVL FSGVLF GIMGFSILT VGISVKTTLTCRRKGFMMG

>TcasOr26 (AM689928)

MMESTVTRLKRMYLWPTASVTSRKP AFFLITFSCFLLYGSVMHLIVNDISMEEVHVIETTAG  
QFGVLYYLT LFTIYRKGILEIYADLSNF TKFGKPYNFDKRNKQLNQWSRWF SVVLYFFVISV  
FAWPGIFTQSCEDLNVALNKTEVCGVVSPVWLPFRFDYKPMKQFVYFWQSFCCLYSNGGAGT  
ISFAMSETIEHLILRVEDLKILFPKIVAERSPEVRRKMLAKWVDYHLWLLSIGKLMNDTYRY  
SFSVIVLCAGTLFGCIGYTVMKFHSVGT TVYNSEWCDTDVDFQKGVILITIRAQKPVRIYAG  
PFSYVSHLLILT V FQTSYSYINLLNASS

**B**

| <b>ID</b> | <b>TcasGr1 (AM292322)</b> |     |     |                  |
|-----------|---------------------------|-----|-----|------------------|
| FT        | DOMAIN                    | 1   | 41  | NON CYTOPLASMIC. |
| FT        | TRANSMEM                  | 42  | 61  |                  |
| FT        | DOMAIN                    | 62  | 70  | CYTOPLASMIC.     |
| FT        | TRANSMEM                  | 71  | 93  |                  |
| FT        | DOMAIN                    | 94  | 134 | NON CYTOPLASMIC. |
| FT        | TRANSMEM                  | 135 | 154 |                  |
| FT        | DOMAIN                    | 155 | 170 | CYTOPLASMIC.     |
| FT        | TRANSMEM                  | 171 | 191 |                  |
| FT        | DOMAIN                    | 192 | 207 | NON CYTOPLASMIC. |
| FT        | TRANSMEM                  | 208 | 229 |                  |
| FT        | DOMAIN                    | 230 | 241 | CYTOPLASMIC.     |
| FT        | TRANSMEM                  | 242 | 266 |                  |
| FT        | DOMAIN                    | 267 | 272 | NON CYTOPLASMIC. |
| FT        | TRANSMEM                  | 273 | 296 |                  |
| FT        | DOMAIN                    | 297 | 373 | CYTOPLASMIC.     |
| //        |                           |     |     |                  |
| <b>ID</b> | <b>TcasGr2 (AM292323)</b> |     |     |                  |
| FT        | DOMAIN                    | 1   | 187 | NON CYTOPLASMIC. |
| FT        | TRANSMEM                  | 188 | 209 |                  |
| FT        | DOMAIN                    | 210 | 222 | CYTOPLASMIC.     |
| FT        | TRANSMEM                  | 223 | 246 |                  |
| FT        | DOMAIN                    | 247 | 284 | NON CYTOPLASMIC. |
| FT        | TRANSMEM                  | 285 | 305 |                  |
| FT        | DOMAIN                    | 306 | 317 | CYTOPLASMIC.     |
| FT        | TRANSMEM                  | 318 | 339 |                  |
| FT        | DOMAIN                    | 340 | 390 | NON CYTOPLASMIC. |
| FT        | TRANSMEM                  | 391 | 412 |                  |
| FT        | DOMAIN                    | 413 | 440 | CYTOPLASMIC.     |
| FT        | TRANSMEM                  | 441 | 463 |                  |
| FT        | DOMAIN                    | 464 | 521 | NON CYTOPLASMIC. |
| FT        | TRANSMEM                  | 522 | 545 |                  |
| FT        | DOMAIN                    | 546 | 586 | CYTOPLASMIC.     |
| //        |                           |     |     |                  |
| <b>ID</b> | <b>TcasGr3 (AM292359)</b> |     |     |                  |
| FT        | DOMAIN                    | 1   | 58  | NON CYTOPLASMIC. |
| FT        | TRANSMEM                  | 59  | 79  |                  |
| FT        | DOMAIN                    | 80  | 91  | CYTOPLASMIC.     |
| FT        | TRANSMEM                  | 92  | 111 |                  |
| FT        | DOMAIN                    | 112 | 133 | NON CYTOPLASMIC. |
| FT        | TRANSMEM                  | 134 | 155 |                  |
| FT        | DOMAIN                    | 156 | 176 | CYTOPLASMIC.     |
| FT        | TRANSMEM                  | 177 | 196 |                  |
| FT        | DOMAIN                    | 197 | 211 | NON CYTOPLASMIC. |
| FT        | TRANSMEM                  | 212 | 234 |                  |
| FT        | DOMAIN                    | 235 | 286 | CYTOPLASMIC.     |
| FT        | TRANSMEM                  | 287 | 308 |                  |
| FT        | DOMAIN                    | 309 | 313 | NON CYTOPLASMIC. |
| FT        | TRANSMEM                  | 314 | 335 |                  |
| FT        | DOMAIN                    | 336 | 436 | CYTOPLASMIC.     |
| //        |                           |     |     |                  |

|           |                           |     |     |                  |
|-----------|---------------------------|-----|-----|------------------|
| <b>ID</b> | <b>TcasGr4 (AM292325)</b> |     |     |                  |
| FT        | DOMAIN                    | 1   | 32  | NON CYTOPLASMIC. |
| FT        | TRANSMEM                  | 33  | 51  |                  |
| FT        | DOMAIN                    | 52  | 64  | CYTOPLASMIC.     |
| FT        | TRANSMEM                  | 65  | 88  |                  |
| FT        | DOMAIN                    | 89  | 119 | NON CYTOPLASMIC. |
| FT        | TRANSMEM                  | 120 | 142 |                  |
| FT        | DOMAIN                    | 143 | 155 | CYTOPLASMIC.     |
| FT        | TRANSMEM                  | 156 | 176 |                  |
| FT        | DOMAIN                    | 177 | 192 | NON CYTOPLASMIC. |
| FT        | TRANSMEM                  | 193 | 213 |                  |
| FT        | DOMAIN                    | 214 | 226 | CYTOPLASMIC.     |
| FT        | TRANSMEM                  | 227 | 248 |                  |
| FT        | DOMAIN                    | 249 | 258 | NON CYTOPLASMIC. |
| FT        | TRANSMEM                  | 259 | 281 |                  |
| FT        | DOMAIN                    | 282 | 309 | CYTOPLASMIC.     |
| //        |                           |     |     |                  |
| <b>ID</b> | <b>TcasGr5 (AM292326)</b> |     |     |                  |
| FT        | DOMAIN                    | 1   | 109 | NON CYTOPLASMIC. |
| FT        | TRANSMEM                  | 110 | 131 |                  |
| FT        | DOMAIN                    | 132 | 147 | CYTOPLASMIC.     |
| FT        | TRANSMEM                  | 148 | 169 |                  |
| FT        | DOMAIN                    | 170 | 209 | NON CYTOPLASMIC. |
| FT        | TRANSMEM                  | 210 | 230 |                  |
| FT        | DOMAIN                    | 231 | 244 | CYTOPLASMIC.     |
| FT        | TRANSMEM                  | 245 | 265 |                  |
| FT        | DOMAIN                    | 266 | 311 | NON CYTOPLASMIC. |
| FT        | TRANSMEM                  | 312 | 334 |                  |
| FT        | DOMAIN                    | 335 | 344 | CYTOPLASMIC.     |
| FT        | TRANSMEM                  | 345 | 369 |                  |
| FT        | DOMAIN                    | 370 | 392 | NON CYTOPLASMIC. |
| FT        | TRANSMEM                  | 393 | 413 |                  |
| FT        | DOMAIN                    | 414 | 522 | CYTOPLASMIC.     |
| //        |                           |     |     |                  |
| <b>ID</b> | <b>TCasGr6 (AM292327)</b> |     |     |                  |
| FT        | DOMAIN                    | 1   | 127 | NON CYTOPLASMIC. |
| FT        | TRANSMEM                  | 128 | 151 |                  |
| FT        | DOMAIN                    | 152 | 161 | CYTOPLASMIC.     |
| FT        | TRANSMEM                  | 162 | 186 |                  |
| FT        | DOMAIN                    | 187 | 212 | NON CYTOPLASMIC. |
| FT        | TRANSMEM                  | 213 | 232 |                  |
| FT        | DOMAIN                    | 233 | 247 | CYTOPLASMIC.     |
| FT        | TRANSMEM                  | 248 | 267 |                  |
| FT        | DOMAIN                    | 268 | 282 | NON CYTOPLASMIC. |
| FT        | TRANSMEM                  | 283 | 304 |                  |
| FT        | DOMAIN                    | 305 | 336 | CYTOPLASMIC.     |
| FT        | TRANSMEM                  | 337 | 356 |                  |
| FT        | DOMAIN                    | 357 | 358 | NON CYTOPLASMIC. |
| FT        | TRANSMEM                  | 359 | 378 |                  |
| FT        | DOMAIN                    | 379 | 387 | CYTOPLASMIC.     |
| //        |                           |     |     |                  |
| <b>ID</b> | <b>TcasGr7 (AM292328)</b> |     |     |                  |
| FT        | DOMAIN                    | 1   | 73  | NON CYTOPLASMIC. |



|           |                             |     |     |                  |
|-----------|-----------------------------|-----|-----|------------------|
| FT        | TRANSMEM                    | 74  | 95  |                  |
| FT        | DOMAIN                      | 96  | 105 | CYTOPLASMIC.     |
| FT        | TRANSMEM                    | 106 | 125 |                  |
| FT        | DOMAIN                      | 126 | 150 | NON CYTOPLASMIC. |
| FT        | TRANSMEM                    | 151 | 172 |                  |
| FT        | DOMAIN                      | 173 | 191 | CYTOPLASMIC.     |
| FT        | TRANSMEM                    | 192 | 212 |                  |
| FT        | DOMAIN                      | 213 | 225 | NON CYTOPLASMIC. |
| FT        | TRANSMEM                    | 226 | 246 |                  |
| FT        | DOMAIN                      | 247 | 288 | CYTOPLASMIC.     |
| FT        | TRANSMEM                    | 289 | 310 |                  |
| FT        | DOMAIN                      | 311 | 319 | NON CYTOPLASMIC. |
| FT        | TRANSMEM                    | 320 | 340 |                  |
| FT        | DOMAIN                      | 341 | 429 | CYTOPLASMIC.     |
| //        |                             |     |     |                  |
| <b>ID</b> | <b>TcasGr104 (AM292329)</b> |     |     |                  |
| FT        | DOMAIN                      | 1   | 44  | NON CYTOPLASMIC. |
| FT        | TRANSMEM                    | 45  | 64  |                  |
| FT        | DOMAIN                      | 65  | 74  | CYTOPLASMIC.     |
| FT        | TRANSMEM                    | 75  | 97  |                  |
| FT        | DOMAIN                      | 98  | 138 | NON CYTOPLASMIC. |
| FT        | TRANSMEM                    | 139 | 160 |                  |
| FT        | DOMAIN                      | 161 | 173 | CYTOPLASMIC.     |
| FT        | TRANSMEM                    | 174 | 193 |                  |
| FT        | DOMAIN                      | 194 | 231 | NON CYTOPLASMIC. |
| FT        | TRANSMEM                    | 232 | 258 |                  |
| FT        | DOMAIN                      | 259 | 280 | CYTOPLASMIC.     |
| FT        | TRANSMEM                    | 281 | 304 |                  |
| FT        | DOMAIN                      | 305 | 348 | NON CYTOPLASMIC. |
| FT        | TRANSMEM                    | 349 | 370 |                  |
| FT        | DOMAIN                      | 371 | 379 | CYTOPLASMIC.     |
| //        |                             |     |     |                  |
| <b>ID</b> | <b>TcasGr9 (AM292330)</b>   |     |     |                  |
| FT        | DOMAIN                      | 1   | 54  | NON CYTOPLASMIC. |
| FT        | TRANSMEM                    | 55  | 77  |                  |
| FT        | DOMAIN                      | 78  | 88  | CYTOPLASMIC.     |
| FT        | TRANSMEM                    | 89  | 110 |                  |
| FT        | DOMAIN                      | 111 | 138 | NON CYTOPLASMIC. |
| FT        | TRANSMEM                    | 139 | 159 |                  |
| FT        | DOMAIN                      | 160 | 173 | CYTOPLASMIC.     |
| FT        | TRANSMEM                    | 174 | 193 |                  |
| FT        | DOMAIN                      | 194 | 223 | NON CYTOPLASMIC. |
| FT        | TRANSMEM                    | 224 | 244 |                  |
| FT        | DOMAIN                      | 245 | 286 | CYTOPLASMIC.     |
| FT        | TRANSMEM                    | 287 | 310 |                  |
| FT        | DOMAIN                      | 311 | 318 | NON CYTOPLASMIC. |
| FT        | TRANSMEM                    | 319 | 339 |                  |
| FT        | DOMAIN                      | 340 | 408 | CYTOPLASMIC.     |
| //        |                             |     |     |                  |
| <b>ID</b> | <b>TcasGr10 (AM292331)</b>  |     |     |                  |
| FT        | DOMAIN                      | 1   | 85  | NON CYTOPLASMIC. |
| FT        | TRANSMEM                    | 86  | 110 |                  |
| FT        | DOMAIN                      | 111 | 120 | CYTOPLASMIC.     |

|           |                            |     |     |                  |
|-----------|----------------------------|-----|-----|------------------|
| FT        | TRANSMEM                   | 121 | 141 |                  |
| FT        | DOMAIN                     | 142 | 167 | NON CYTOPLASMIC. |
| FT        | TRANSMEM                   | 168 | 190 |                  |
| FT        | DOMAIN                     | 191 | 208 | CYTOPLASMIC.     |
| FT        | TRANSMEM                   | 209 | 228 |                  |
| FT        | DOMAIN                     | 229 | 269 | NON CYTOPLASMIC. |
| FT        | TRANSMEM                   | 270 | 294 |                  |
| FT        | DOMAIN                     | 295 | 306 | CYTOPLASMIC.     |
| FT        | TRANSMEM                   | 307 | 329 |                  |
| FT        | DOMAIN                     | 330 | 385 | NON CYTOPLASMIC. |
| FT        | TRANSMEM                   | 386 | 406 |                  |
| FT        | DOMAIN                     | 407 | 437 | CYTOPLASMIC.     |
| //        |                            |     |     |                  |
| <b>ID</b> | <b>TcasGr11 (AM292332)</b> |     |     |                  |
| FT        | DOMAIN                     | 1   | 56  | NON CYTOPLASMIC. |
| FT        | TRANSMEM                   | 57  | 77  |                  |
| FT        | DOMAIN                     | 78  | 89  | CYTOPLASMIC.     |
| FT        | TRANSMEM                   | 90  | 112 |                  |
| FT        | DOMAIN                     | 113 | 140 | NON CYTOPLASMIC. |
| FT        | TRANSMEM                   | 141 | 161 |                  |
| FT        | DOMAIN                     | 162 | 175 | CYTOPLASMIC.     |
| FT        | TRANSMEM                   | 176 | 197 |                  |
| FT        | DOMAIN                     | 198 | 240 | NON CYTOPLASMIC. |
| FT        | TRANSMEM                   | 241 | 264 |                  |
| FT        | DOMAIN                     | 265 | 276 | CYTOPLASMIC.     |
| FT        | TRANSMEM                   | 277 | 297 |                  |
| FT        | DOMAIN                     | 298 | 302 | NON CYTOPLASMIC. |
| FT        | TRANSMEM                   | 303 | 324 |                  |
| FT        | DOMAIN                     | 325 | 344 | CYTOPLASMIC.     |
| //        |                            |     |     |                  |
| <b>ID</b> | <b>TcasGr12 (AM292333)</b> |     |     |                  |
| FT        | DOMAIN                     | 1   | 28  | NON CYTOPLASMIC. |
| FT        | TRANSMEM                   | 29  | 48  |                  |
| FT        | DOMAIN                     | 49  | 60  | CYTOPLASMIC.     |
| FT        | TRANSMEM                   | 61  | 83  |                  |
| FT        | DOMAIN                     | 84  | 104 | NON CYTOPLASMIC. |
| FT        | TRANSMEM                   | 105 | 125 |                  |
| FT        | DOMAIN                     | 126 | 142 | CYTOPLASMIC.     |
| FT        | TRANSMEM                   | 143 | 163 |                  |
| FT        | DOMAIN                     | 164 | 209 | NON CYTOPLASMIC. |
| FT        | TRANSMEM                   | 210 | 234 |                  |
| FT        | DOMAIN                     | 235 | 266 | CYTOPLASMIC.     |
| FT        | TRANSMEM                   | 267 | 287 |                  |
| FT        | DOMAIN                     | 288 | 290 | NON CYTOPLASMIC. |
| FT        | TRANSMEM                   | 291 | 309 |                  |
| FT        | DOMAIN                     | 310 | 316 | CYTOPLASMIC.     |
| //        |                            |     |     |                  |
| <b>ID</b> | <b>TcasGr13 (AM292334)</b> |     |     |                  |
| FT        | DOMAIN                     | 1   | 102 | NON CYTOPLASMIC. |
| FT        | TRANSMEM                   | 103 | 122 |                  |
| FT        | DOMAIN                     | 123 | 134 | CYTOPLASMIC.     |
| FT        | TRANSMEM                   | 135 | 157 |                  |
| FT        | DOMAIN                     | 158 | 178 | NON CYTOPLASMIC. |

|           |                            |     |     |                  |
|-----------|----------------------------|-----|-----|------------------|
| FT        | TRANSMEM                   | 179 | 199 |                  |
| FT        | DOMAIN                     | 200 | 216 | CYTOPLASMIC.     |
| FT        | TRANSMEM                   | 217 | 237 |                  |
| FT        | DOMAIN                     | 238 | 283 | NON CYTOPLASMIC. |
| FT        | TRANSMEM                   | 284 | 308 |                  |
| FT        | DOMAIN                     | 309 | 340 | CYTOPLASMIC.     |
| FT        | TRANSMEM                   | 341 | 361 |                  |
| FT        | DOMAIN                     | 362 | 364 | NON CYTOPLASMIC. |
| FT        | TRANSMEM                   | 365 | 383 |                  |
| FT        | DOMAIN                     | 384 | 390 | CYTOPLASMIC.     |
| //        |                            |     |     |                  |
| <b>ID</b> | <b>TcasGr14 (AM292335)</b> |     |     |                  |
| FT        | SIGNAL                     | 1   | 27  |                  |
| FT        | DOMAIN                     | 1   | 10  | N-REGION.        |
| FT        | DOMAIN                     | 11  | 21  | H-REGION.        |
| FT        | DOMAIN                     | 22  | 27  | C-REGION.        |
| FT        | DOMAIN                     | 28  | 114 | NON CYTOPLASMIC. |
| FT        | TRANSMEM                   | 115 | 135 |                  |
| FT        | DOMAIN                     | 136 | 148 | CYTOPLASMIC.     |
| FT        | TRANSMEM                   | 149 | 173 |                  |
| FT        | DOMAIN                     | 174 | 185 | NON CYTOPLASMIC. |
| FT        | TRANSMEM                   | 186 | 206 |                  |
| FT        | DOMAIN                     | 207 | 225 | CYTOPLASMIC.     |
| FT        | TRANSMEM                   | 226 | 246 |                  |
| FT        | DOMAIN                     | 247 | 270 | NON CYTOPLASMIC. |
| FT        | TRANSMEM                   | 271 | 294 |                  |
| FT        | DOMAIN                     | 295 | 323 | CYTOPLASMIC.     |
| FT        | TRANSMEM                   | 324 | 344 |                  |
| FT        | DOMAIN                     | 345 | 347 | NON CYTOPLASMIC. |
| FT        | TRANSMEM                   | 348 | 369 |                  |
| FT        | DOMAIN                     | 370 | 374 | CYTOPLASMIC.     |
| //        |                            |     |     |                  |
| <b>ID</b> | <b>TcasGr15 (AM292336)</b> |     |     |                  |
| FT        | DOMAIN                     | 1   | 117 | NON CYTOPLASMIC. |
| FT        | TRANSMEM                   | 118 | 138 |                  |
| FT        | DOMAIN                     | 139 | 149 | CYTOPLASMIC.     |
| FT        | TRANSMEM                   | 150 | 175 |                  |
| FT        | DOMAIN                     | 176 | 242 | NON CYTOPLASMIC. |
| FT        | TRANSMEM                   | 243 | 262 |                  |
| FT        | DOMAIN                     | 263 | 282 | CYTOPLASMIC.     |
| FT        | TRANSMEM                   | 283 | 302 |                  |
| FT        | DOMAIN                     | 303 | 358 | NON CYTOPLASMIC. |
| FT        | TRANSMEM                   | 359 | 380 |                  |
| FT        | DOMAIN                     | 381 | 390 | CYTOPLASMIC.     |
| FT        | TRANSMEM                   | 391 | 412 |                  |
| FT        | DOMAIN                     | 413 | 420 | NON CYTOPLASMIC. |
| FT        | TRANSMEM                   | 421 | 442 |                  |
| FT        | DOMAIN                     | 443 | 455 | CYTOPLASMIC.     |
| //        |                            |     |     |                  |
| <b>ID</b> | <b>TcasGr16 (AM292337)</b> |     |     |                  |
| FT        | DOMAIN                     | 1   | 36  | NON CYTOPLASMIC. |
| FT        | TRANSMEM                   | 37  | 57  |                  |
| FT        | DOMAIN                     | 58  | 72  | CYTOPLASMIC.     |

|           |                             |     |     |                  |
|-----------|-----------------------------|-----|-----|------------------|
| FT        | TRANSMEM                    | 73  | 98  |                  |
| FT        | DOMAIN                      | 99  | 132 | NON CYTOPLASMIC. |
| FT        | TRANSMEM                    | 133 | 154 |                  |
| FT        | DOMAIN                      | 155 | 175 | CYTOPLASMIC.     |
| FT        | TRANSMEM                    | 176 | 196 |                  |
| FT        | DOMAIN                      | 197 | 254 | NON CYTOPLASMIC. |
| FT        | TRANSMEM                    | 255 | 279 |                  |
| FT        | DOMAIN                      | 280 | 288 | CYTOPLASMIC.     |
| FT        | TRANSMEM                    | 289 | 310 |                  |
| FT        | DOMAIN                      | 311 | 350 | NON CYTOPLASMIC. |
| FT        | TRANSMEM                    | 351 | 371 |                  |
| FT        | DOMAIN                      | 372 | 452 | CYTOPLASMIC.     |
| //        |                             |     |     |                  |
| <b>ID</b> | <b>TcasGr17 (AM292338)</b>  |     |     |                  |
| FT        | DOMAIN                      | 1   | 32  | NON CYTOPLASMIC. |
| FT        | TRANSMEM                    | 33  | 54  |                  |
| FT        | DOMAIN                      | 55  | 67  | CYTOPLASMIC.     |
| FT        | TRANSMEM                    | 68  | 89  |                  |
| FT        | DOMAIN                      | 90  | 125 | NON CYTOPLASMIC. |
| FT        | TRANSMEM                    | 126 | 147 |                  |
| FT        | DOMAIN                      | 148 | 162 | CYTOPLASMIC.     |
| FT        | TRANSMEM                    | 163 | 184 |                  |
| FT        | DOMAIN                      | 185 | 236 | NON CYTOPLASMIC. |
| FT        | TRANSMEM                    | 237 | 261 |                  |
| FT        | DOMAIN                      | 262 | 274 | CYTOPLASMIC.     |
| FT        | TRANSMEM                    | 275 | 295 |                  |
| FT        | DOMAIN                      | 296 | 333 | NON CYTOPLASMIC. |
| FT        | TRANSMEM                    | 334 | 353 |                  |
| FT        | DOMAIN                      | 354 | 372 | CYTOPLASMIC.     |
| //        |                             |     |     |                  |
| <b>ID</b> | <b>TcasGr150 (AM292339)</b> |     |     |                  |
| FT        | DOMAIN                      | 1   | 32  | NON CYTOPLASMIC. |
| FT        | TRANSMEM                    | 33  | 54  |                  |
| FT        | DOMAIN                      | 55  | 67  | CYTOPLASMIC.     |
| FT        | TRANSMEM                    | 68  | 89  |                  |
| FT        | DOMAIN                      | 90  | 125 | NON CYTOPLASMIC. |
| FT        | TRANSMEM                    | 126 | 147 |                  |
| FT        | DOMAIN                      | 148 | 162 | CYTOPLASMIC.     |
| FT        | TRANSMEM                    | 163 | 184 |                  |
| FT        | DOMAIN                      | 185 | 236 | NON CYTOPLASMIC. |
| FT        | TRANSMEM                    | 237 | 261 |                  |
| FT        | DOMAIN                      | 262 | 274 | CYTOPLASMIC.     |
| FT        | TRANSMEM                    | 275 | 295 |                  |
| FT        | DOMAIN                      | 296 | 345 | NON CYTOPLASMIC. |
| FT        | TRANSMEM                    | 346 | 368 |                  |
| FT        | DOMAIN                      | 369 | 387 | CYTOPLASMIC.     |
| //        |                             |     |     |                  |
| <b>ID</b> | <b>TcasGr19 (AM292340)</b>  |     |     |                  |
| FT        | DOMAIN                      | 1   | 55  | NON CYTOPLASMIC. |
| FT        | TRANSMEM                    | 56  | 79  |                  |
| FT        | DOMAIN                      | 80  | 88  | CYTOPLASMIC.     |
| FT        | TRANSMEM                    | 89  | 111 |                  |
| FT        | DOMAIN                      | 112 | 124 | NON CYTOPLASMIC. |

|           |                            |     |     |                  |
|-----------|----------------------------|-----|-----|------------------|
| FT        | TRANSMEM                   | 125 | 150 |                  |
| FT        | DOMAIN                     | 151 | 168 | CYTOPLASMIC.     |
| FT        | TRANSMEM                   | 169 | 189 |                  |
| FT        | DOMAIN                     | 190 | 219 | NON CYTOPLASMIC. |
| FT        | TRANSMEM                   | 220 | 242 |                  |
| FT        | DOMAIN                     | 243 | 251 | CYTOPLASMIC.     |
| FT        | TRANSMEM                   | 252 | 275 |                  |
| FT        | DOMAIN                     | 276 | 278 | NON CYTOPLASMIC. |
| FT        | TRANSMEM                   | 279 | 301 |                  |
| FT        | DOMAIN                     | 302 | 355 | CYTOPLASMIC.     |
| //        |                            |     |     |                  |
| <b>ID</b> | <b>TcasGr20 (AM292341)</b> |     |     |                  |
| FT        | DOMAIN                     | 1   | 51  | NON CYTOPLASMIC. |
| FT        | TRANSMEM                   | 52  | 73  |                  |
| FT        | DOMAIN                     | 74  | 83  | CYTOPLASMIC.     |
| FT        | TRANSMEM                   | 84  | 109 |                  |
| FT        | DOMAIN                     | 110 | 136 | NON CYTOPLASMIC. |
| FT        | TRANSMEM                   | 137 | 159 |                  |
| FT        | DOMAIN                     | 160 | 175 | CYTOPLASMIC.     |
| FT        | TRANSMEM                   | 176 | 197 |                  |
| FT        | DOMAIN                     | 198 | 265 | NON CYTOPLASMIC. |
| FT        | TRANSMEM                   | 266 | 291 |                  |
| FT        | DOMAIN                     | 292 | 312 | CYTOPLASMIC.     |
| FT        | TRANSMEM                   | 313 | 334 |                  |
| FT        | DOMAIN                     | 335 | 360 | NON CYTOPLASMIC. |
| FT        | TRANSMEM                   | 361 | 383 |                  |
| FT        | DOMAIN                     | 384 | 393 | CYTOPLASMIC.     |
| //        |                            |     |     |                  |
| <b>ID</b> | <b>TcasGr21 (AM292342)</b> |     |     |                  |
| FT        | DOMAIN                     | 1   | 48  | NON CYTOPLASMIC. |
| FT        | TRANSMEM                   | 49  | 74  |                  |
| FT        | DOMAIN                     | 75  | 89  | CYTOPLASMIC.     |
| FT        | TRANSMEM                   | 90  | 115 |                  |
| FT        | DOMAIN                     | 116 | 143 | NON CYTOPLASMIC. |
| FT        | TRANSMEM                   | 144 | 164 |                  |
| FT        | DOMAIN                     | 165 | 176 | CYTOPLASMIC.     |
| FT        | TRANSMEM                   | 177 | 196 |                  |
| FT        | DOMAIN                     | 197 | 250 | NON CYTOPLASMIC. |
| FT        | TRANSMEM                   | 251 | 272 |                  |
| FT        | DOMAIN                     | 273 | 286 | CYTOPLASMIC.     |
| FT        | TRANSMEM                   | 287 | 308 |                  |
| FT        | DOMAIN                     | 309 | 325 | NON CYTOPLASMIC. |
| FT        | TRANSMEM                   | 326 | 345 |                  |
| FT        | DOMAIN                     | 346 | 386 | CYTOPLASMIC.     |
| //        |                            |     |     |                  |
| <b>ID</b> | <b>TcasGr22 (AM292343)</b> |     |     |                  |
| FT        | DOMAIN                     | 1   | 51  | NON CYTOPLASMIC. |
| FT        | TRANSMEM                   | 52  | 71  |                  |
| FT        | DOMAIN                     | 72  | 80  | CYTOPLASMIC.     |
| FT        | TRANSMEM                   | 81  | 98  |                  |
| FT        | DOMAIN                     | 99  | 110 | NON CYTOPLASMIC. |
| FT        | TRANSMEM                   | 111 | 129 |                  |
| FT        | DOMAIN                     | 130 | 149 | CYTOPLASMIC.     |

|           |                             |     |     |                  |
|-----------|-----------------------------|-----|-----|------------------|
| FT        | TRANSMEM                    | 150 | 170 |                  |
| FT        | DOMAIN                      | 171 | 184 | NON CYTOPLASMIC. |
| FT        | TRANSMEM                    | 185 | 209 |                  |
| FT        | DOMAIN                      | 210 | 246 | CYTOPLASMIC.     |
| FT        | TRANSMEM                    | 247 | 265 |                  |
| FT        | DOMAIN                      | 266 | 267 | NON CYTOPLASMIC. |
| FT        | TRANSMEM                    | 268 | 287 |                  |
| FT        | DOMAIN                      | 288 | 301 | CYTOPLASMIC.     |
| //        |                             |     |     |                  |
| <b>ID</b> | <b>TcasGr79 (AM292344)</b>  |     |     |                  |
| FT        | DOMAIN                      | 1   | 54  | NON CYTOPLASMIC. |
| FT        | TRANSMEM                    | 55  | 75  |                  |
| FT        | DOMAIN                      | 76  | 85  | CYTOPLASMIC.     |
| FT        | TRANSMEM                    | 86  | 108 |                  |
| FT        | DOMAIN                      | 109 | 122 | NON CYTOPLASMIC. |
| FT        | TRANSMEM                    | 123 | 142 |                  |
| FT        | DOMAIN                      | 143 | 153 | CYTOPLASMIC.     |
| FT        | TRANSMEM                    | 154 | 173 |                  |
| FT        | DOMAIN                      | 174 | 192 | NON CYTOPLASMIC. |
| FT        | TRANSMEM                    | 193 | 216 |                  |
| FT        | DOMAIN                      | 217 | 243 | CYTOPLASMIC.     |
| FT        | TRANSMEM                    | 244 | 263 |                  |
| FT        | DOMAIN                      | 264 | 266 | NON CYTOPLASMIC. |
| FT        | TRANSMEM                    | 267 | 286 |                  |
| FT        | DOMAIN                      | 287 | 291 | CYTOPLASMIC.     |
| //        |                             |     |     |                  |
| <b>ID</b> | <b>TcasGr123 (AM292345)</b> |     |     |                  |
| FT        | DOMAIN                      | 1   | 72  | NON CYTOPLASMIC. |
| FT        | TRANSMEM                    | 73  | 97  |                  |
| FT        | DOMAIN                      | 98  | 105 | CYTOPLASMIC.     |
| FT        | TRANSMEM                    | 106 | 124 |                  |
| FT        | DOMAIN                      | 125 | 142 | NON CYTOPLASMIC. |
| FT        | TRANSMEM                    | 143 | 164 |                  |
| FT        | DOMAIN                      | 165 | 176 | CYTOPLASMIC.     |
| FT        | TRANSMEM                    | 177 | 196 |                  |
| FT        | DOMAIN                      | 197 | 243 | NON CYTOPLASMIC. |
| FT        | TRANSMEM                    | 244 | 270 |                  |
| FT        | DOMAIN                      | 271 | 280 | CYTOPLASMIC.     |
| FT        | TRANSMEM                    | 281 | 301 |                  |
| FT        | DOMAIN                      | 302 | 351 | NON CYTOPLASMIC. |
| FT        | TRANSMEM                    | 352 | 374 |                  |
| FT        | DOMAIN                      | 375 | 384 | CYTOPLASMIC.     |
| //        |                             |     |     |                  |
| <b>ID</b> | <b>TcasGr25 (AM292346)</b>  |     |     |                  |
| FT        | SIGNAL                      | 1   | 18  |                  |
| FT        | DOMAIN                      | 1   | 5   | N-REGION.        |
| FT        | DOMAIN                      | 6   | 13  | H-REGION.        |
| FT        | DOMAIN                      | 14  | 18  | C-REGION.        |
| FT        | DOMAIN                      | 19  | 44  | NON CYTOPLASMIC. |
| FT        | TRANSMEM                    | 45  | 63  |                  |
| FT        | DOMAIN                      | 64  | 70  | CYTOPLASMIC.     |
| FT        | TRANSMEM                    | 71  | 90  |                  |
| FT        | DOMAIN                      | 91  | 100 | NON CYTOPLASMIC. |

|           |                            |     |     |                  |
|-----------|----------------------------|-----|-----|------------------|
| FT        | TRANSMEM                   | 101 | 120 |                  |
| FT        | DOMAIN                     | 121 | 137 | CYTOPLASMIC.     |
| FT        | TRANSMEM                   | 138 | 157 |                  |
| FT        | DOMAIN                     | 158 | 173 | NON CYTOPLASMIC. |
| FT        | TRANSMEM                   | 174 | 197 |                  |
| FT        | DOMAIN                     | 198 | 211 | CYTOPLASMIC.     |
| FT        | TRANSMEM                   | 212 | 230 |                  |
| FT        | DOMAIN                     | 231 | 233 | NON CYTOPLASMIC. |
| FT        | TRANSMEM                   | 234 | 252 |                  |
| FT        | DOMAIN                     | 253 | 314 | CYTOPLASMIC.     |
| //        |                            |     |     |                  |
| <b>ID</b> | <b>TcasGr26 (AM292347)</b> |     |     |                  |
| FT        | DOMAIN                     | 1   | 127 | NON CYTOPLASMIC. |
| FT        | TRANSMEM                   | 128 | 151 |                  |
| FT        | DOMAIN                     | 152 | 161 | CYTOPLASMIC.     |
| FT        | TRANSMEM                   | 162 | 186 |                  |
| FT        | DOMAIN                     | 187 | 212 | NON CYTOPLASMIC. |
| FT        | TRANSMEM                   | 213 | 232 |                  |
| FT        | DOMAIN                     | 233 | 247 | CYTOPLASMIC.     |
| FT        | TRANSMEM                   | 248 | 267 |                  |
| FT        | DOMAIN                     | 268 | 282 | NON CYTOPLASMIC. |
| FT        | TRANSMEM                   | 283 | 304 |                  |
| FT        | DOMAIN                     | 305 | 336 | CYTOPLASMIC.     |
| FT        | TRANSMEM                   | 337 | 356 |                  |
| FT        | DOMAIN                     | 357 | 358 | NON CYTOPLASMIC. |
| FT        | TRANSMEM                   | 359 | 378 |                  |
| FT        | DOMAIN                     | 379 | 387 | CYTOPLASMIC.     |
| //        |                            |     |     |                  |
| <b>ID</b> | <b>TcasGr27 (AM292348)</b> |     |     |                  |
| FT        | DOMAIN                     | 1   | 6   | NON CYTOPLASMIC. |
| FT        | TRANSMEM                   | 7   | 25  |                  |
| FT        | DOMAIN                     | 26  | 34  | CYTOPLASMIC.     |
| FT        | TRANSMEM                   | 35  | 56  |                  |
| FT        | DOMAIN                     | 57  | 77  | NON CYTOPLASMIC. |
| FT        | TRANSMEM                   | 78  | 99  |                  |
| FT        | DOMAIN                     | 100 | 120 | CYTOPLASMIC.     |
| FT        | TRANSMEM                   | 121 | 142 |                  |
| FT        | DOMAIN                     | 143 | 168 | NON CYTOPLASMIC. |
| FT        | TRANSMEM                   | 169 | 194 |                  |
| FT        | DOMAIN                     | 195 | 250 | CYTOPLASMIC.     |
| FT        | TRANSMEM                   | 251 | 273 |                  |
| FT        | DOMAIN                     | 274 | 296 | NON CYTOPLASMIC. |
| FT        | TRANSMEM                   | 297 | 318 |                  |
| FT        | DOMAIN                     | 319 | 346 | CYTOPLASMIC.     |
| //        |                            |     |     |                  |
| <b>ID</b> | <b>TcasGr28 (AM292349)</b> |     |     |                  |
| FT        | DOMAIN                     | 1   | 28  | NON CYTOPLASMIC. |
| FT        | TRANSMEM                   | 29  | 49  |                  |
| FT        | DOMAIN                     | 50  | 60  | CYTOPLASMIC.     |
| FT        | TRANSMEM                   | 61  | 81  |                  |
| FT        | DOMAIN                     | 82  | 92  | NON CYTOPLASMIC. |
| FT        | TRANSMEM                   | 93  | 112 |                  |
| FT        | DOMAIN                     | 113 | 123 | CYTOPLASMIC.     |

|           |                            |     |     |                  |
|-----------|----------------------------|-----|-----|------------------|
| FT        | TRANSMEM                   | 124 | 143 |                  |
| FT        | DOMAIN                     | 144 | 165 | NON CYTOPLASMIC. |
| FT        | TRANSMEM                   | 166 | 186 |                  |
| FT        | DOMAIN                     | 187 | 196 | CYTOPLASMIC.     |
| FT        | TRANSMEM                   | 197 | 217 |                  |
| FT        | DOMAIN                     | 218 | 220 | NON CYTOPLASMIC. |
| FT        | TRANSMEM                   | 221 | 239 |                  |
| FT        | DOMAIN                     | 240 | 248 | CYTOPLASMIC.     |
| //        |                            |     |     |                  |
| <b>ID</b> | <b>TcasGr29 (AM292350)</b> |     |     |                  |
| FT        | DOMAIN                     | 1   | 73  | NON CYTOPLASMIC. |
| FT        | TRANSMEM                   | 74  | 95  |                  |
| FT        | DOMAIN                     | 96  | 105 | CYTOPLASMIC.     |
| FT        | TRANSMEM                   | 106 | 125 |                  |
| FT        | DOMAIN                     | 126 | 150 | NON CYTOPLASMIC. |
| FT        | TRANSMEM                   | 151 | 172 |                  |
| FT        | DOMAIN                     | 173 | 191 | CYTOPLASMIC.     |
| FT        | TRANSMEM                   | 192 | 212 |                  |
| FT        | DOMAIN                     | 213 | 225 | NON CYTOPLASMIC. |
| FT        | TRANSMEM                   | 226 | 246 |                  |
| FT        | DOMAIN                     | 247 | 288 | CYTOPLASMIC.     |
| FT        | TRANSMEM                   | 289 | 310 |                  |
| FT        | DOMAIN                     | 311 | 319 | NON CYTOPLASMIC. |
| FT        | TRANSMEM                   | 320 | 340 |                  |
| FT        | DOMAIN                     | 341 | 429 | CYTOPLASMIC.     |
| //        |                            |     |     |                  |
| <b>ID</b> | <b>TcasGr30 (AM292351)</b> |     |     |                  |
| FT        | DOMAIN                     | 1   | 73  | NON CYTOPLASMIC. |
| FT        | TRANSMEM                   | 74  | 95  |                  |
| FT        | DOMAIN                     | 96  | 105 | CYTOPLASMIC.     |
| FT        | TRANSMEM                   | 106 | 125 |                  |
| FT        | DOMAIN                     | 126 | 150 | NON CYTOPLASMIC. |
| FT        | TRANSMEM                   | 151 | 172 |                  |
| FT        | DOMAIN                     | 173 | 191 | CYTOPLASMIC.     |
| FT        | TRANSMEM                   | 192 | 212 |                  |
| FT        | DOMAIN                     | 213 | 225 | NON CYTOPLASMIC. |
| FT        | TRANSMEM                   | 226 | 246 |                  |
| FT        | DOMAIN                     | 247 | 288 | CYTOPLASMIC.     |
| FT        | TRANSMEM                   | 289 | 310 |                  |
| FT        | DOMAIN                     | 311 | 319 | NON CYTOPLASMIC. |
| FT        | TRANSMEM                   | 320 | 341 |                  |
| FT        | DOMAIN                     | 342 | 394 | CYTOPLASMIC.     |
| //        |                            |     |     |                  |
| <b>ID</b> | <b>TcasGr31 (AM292352)</b> |     |     |                  |
| FT        | DOMAIN                     | 1   | 13  | NON CYTOPLASMIC. |
| FT        | TRANSMEM                   | 14  | 32  |                  |
| FT        | DOMAIN                     | 33  | 37  | CYTOPLASMIC.     |
| FT        | TRANSMEM                   | 38  | 56  |                  |
| FT        | DOMAIN                     | 57  | 66  | NON CYTOPLASMIC. |
| FT        | TRANSMEM                   | 67  | 86  |                  |
| FT        | DOMAIN                     | 87  | 99  | CYTOPLASMIC.     |
| FT        | TRANSMEM                   | 100 | 120 |                  |
| FT        | DOMAIN                     | 121 | 153 | NON CYTOPLASMIC. |



|           |                             |     |     |                  |
|-----------|-----------------------------|-----|-----|------------------|
| FT        | TRANSMEM                    | 154 | 179 |                  |
| FT        | DOMAIN                      | 180 | 190 | CYTOPLASMIC.     |
| FT        | TRANSMEM                    | 191 | 211 |                  |
| FT        | DOMAIN                      | 212 | 224 | NON CYTOPLASMIC. |
| FT        | TRANSMEM                    | 225 | 247 |                  |
| FT        | DOMAIN                      | 248 | 250 | CYTOPLASMIC.     |
| //        |                             |     |     |                  |
| <b>ID</b> | <b>TcasGr 32 (AM292353)</b> |     |     |                  |
| FT        | DOMAIN                      | 1   | 151 | NON CYTOPLASMIC. |
| FT        | TRANSMEM                    | 152 | 174 |                  |
| FT        | DOMAIN                      | 175 | 188 | CYTOPLASMIC.     |
| FT        | TRANSMEM                    | 189 | 209 |                  |
| FT        | DOMAIN                      | 210 | 223 | NON CYTOPLASMIC. |
| FT        | TRANSMEM                    | 224 | 243 |                  |
| FT        | DOMAIN                      | 244 | 257 | CYTOPLASMIC.     |
| FT        | TRANSMEM                    | 258 | 278 |                  |
| FT        | DOMAIN                      | 279 | 323 | NON CYTOPLASMIC. |
| FT        | TRANSMEM                    | 324 | 347 |                  |
| FT        | DOMAIN                      | 348 | 375 | CYTOPLASMIC.     |
| FT        | TRANSMEM                    | 376 | 398 |                  |
| FT        | DOMAIN                      | 399 | 422 | NON CYTOPLASMIC. |
| FT        | TRANSMEM                    | 423 | 445 |                  |
| FT        | DOMAIN                      | 446 | 651 | CYTOPLASMIC.     |
| //        |                             |     |     |                  |
| <b>ID</b> | <b>TcasGr 33 (AM292368)</b> |     |     |                  |
| FT        | DOMAIN                      | 1   | 127 | NON CYTOPLASMIC. |
| FT        | TRANSMEM                    | 128 | 151 |                  |
| FT        | DOMAIN                      | 152 | 161 | CYTOPLASMIC.     |
| FT        | TRANSMEM                    | 162 | 186 |                  |
| FT        | DOMAIN                      | 187 | 212 | NON CYTOPLASMIC. |
| FT        | TRANSMEM                    | 213 | 232 |                  |
| FT        | DOMAIN                      | 233 | 247 | CYTOPLASMIC.     |
| FT        | TRANSMEM                    | 248 | 267 |                  |
| FT        | DOMAIN                      | 268 | 282 | NON CYTOPLASMIC. |
| FT        | TRANSMEM                    | 283 | 304 |                  |
| FT        | DOMAIN                      | 305 | 336 | CYTOPLASMIC.     |
| FT        | TRANSMEM                    | 337 | 356 |                  |
| FT        | DOMAIN                      | 357 | 358 | NON CYTOPLASMIC. |
| FT        | TRANSMEM                    | 359 | 378 |                  |
| FT        | DOMAIN                      | 379 | 387 | CYTOPLASMIC.     |
| //        |                             |     |     |                  |
| <b>ID</b> | <b>TcasGr 34 (AM292355)</b> |     |     |                  |
| FT        | DOMAIN                      | 1   | 24  | NON CYTOPLASMIC. |
| FT        | TRANSMEM                    | 25  | 43  |                  |
| FT        | DOMAIN                      | 44  | 52  | CYTOPLASMIC.     |
| FT        | TRANSMEM                    | 53  | 76  |                  |
| FT        | DOMAIN                      | 77  | 92  | NON CYTOPLASMIC. |
| FT        | TRANSMEM                    | 93  | 113 |                  |
| FT        | DOMAIN                      | 114 | 128 | CYTOPLASMIC.     |
| FT        | TRANSMEM                    | 129 | 150 |                  |
| FT        | DOMAIN                      | 151 | 195 | NON CYTOPLASMIC. |
| FT        | TRANSMEM                    | 196 | 218 |                  |

|           |                            |     |     |                  |
|-----------|----------------------------|-----|-----|------------------|
| FT        | DOMAIN                     | 219 | 235 | CYTOPLASMIC.     |
| FT        | TRANSMEM                   | 236 | 256 |                  |
| FT        | DOMAIN                     | 257 | 295 | NON CYTOPLASMIC. |
| FT        | TRANSMEM                   | 296 | 318 |                  |
| FT        | DOMAIN                     | 319 | 324 | CYTOPLASMIC.     |
| //        |                            |     |     |                  |
| <b>ID</b> | <b>TcasGr35 (AM292356)</b> |     |     |                  |
| FT        | DOMAIN                     | 1   | 4   | NON CYTOPLASMIC. |
| FT        | TRANSMEM                   | 5   | 26  |                  |
| FT        | DOMAIN                     | 27  | 39  | CYTOPLASMIC.     |
| FT        | TRANSMEM                   | 40  | 62  |                  |
| FT        | DOMAIN                     | 63  | 73  | NON CYTOPLASMIC. |
| FT        | TRANSMEM                   | 74  | 93  |                  |
| FT        | DOMAIN                     | 94  | 114 | CYTOPLASMIC.     |
| FT        | TRANSMEM                   | 115 | 135 |                  |
| FT        | DOMAIN                     | 136 | 149 | NON CYTOPLASMIC. |
| FT        | TRANSMEM                   | 150 | 172 |                  |
| FT        | DOMAIN                     | 173 | 203 | CYTOPLASMIC.     |
| FT        | TRANSMEM                   | 204 | 224 |                  |
| FT        | DOMAIN                     | 225 | 227 | NON CYTOPLASMIC. |
| FT        | TRANSMEM                   | 228 | 248 |                  |
| FT        | DOMAIN                     | 249 | 251 | CYTOPLASMIC.     |
| //        |                            |     |     |                  |
| <b>ID</b> | <b>TcasGr36 (AM292357)</b> |     |     |                  |
| FT        | DOMAIN                     | 1   | 43  | NON CYTOPLASMIC. |
| FT        | TRANSMEM                   | 44  | 63  |                  |
| FT        | DOMAIN                     | 64  | 70  | CYTOPLASMIC.     |
| FT        | TRANSMEM                   | 71  | 93  |                  |
| FT        | DOMAIN                     | 94  | 131 | NON CYTOPLASMIC. |
| FT        | TRANSMEM                   | 132 | 151 |                  |
| FT        | DOMAIN                     | 152 | 166 | CYTOPLASMIC.     |
| FT        | TRANSMEM                   | 167 | 186 |                  |
| FT        | DOMAIN                     | 187 | 212 | NON CYTOPLASMIC. |
| FT        | TRANSMEM                   | 213 | 236 |                  |
| FT        | DOMAIN                     | 237 | 253 | CYTOPLASMIC.     |
| FT        | TRANSMEM                   | 254 | 276 |                  |
| FT        | DOMAIN                     | 277 | 328 | NON CYTOPLASMIC. |
| FT        | TRANSMEM                   | 329 | 350 |                  |
| FT        | DOMAIN                     | 351 | 355 | CYTOPLASMIC.     |
| //        |                            |     |     |                  |
| <b>ID</b> | <b>TcasGr37 (AM292358)</b> |     |     |                  |
| FT        | DOMAIN                     | 1   | 25  | NON CYTOPLASMIC. |
| FT        | TRANSMEM                   | 26  | 47  |                  |
| FT        | DOMAIN                     | 48  | 57  | CYTOPLASMIC.     |
| FT        | TRANSMEM                   | 58  | 80  |                  |
| FT        | DOMAIN                     | 81  | 107 | NON CYTOPLASMIC. |
| FT        | TRANSMEM                   | 108 | 129 |                  |
| FT        | DOMAIN                     | 130 | 143 | CYTOPLASMIC.     |
| FT        | TRANSMEM                   | 144 | 164 |                  |
| FT        | DOMAIN                     | 165 | 194 | NON CYTOPLASMIC. |
| FT        | TRANSMEM                   | 195 | 218 |                  |
| FT        | DOMAIN                     | 219 | 236 | CYTOPLASMIC.     |
| FT        | TRANSMEM                   | 237 | 260 |                  |

|           |                            |     |     |                  |
|-----------|----------------------------|-----|-----|------------------|
| FT        | DOMAIN                     | 261 | 283 | NON CYTOPLASMIC. |
| FT        | TRANSMEM                   | 284 | 303 |                  |
| FT        | DOMAIN                     | 304 | 331 | CYTOPLASMIC.     |
| //        |                            |     |     |                  |
| <b>ID</b> | <b>TcasGr38 (AM292324)</b> |     |     |                  |
| FT        | DOMAIN                     | 1   | 58  | NON CYTOPLASMIC. |
| FT        | TRANSMEM                   | 59  | 81  |                  |
| FT        | DOMAIN                     | 82  | 95  | CYTOPLASMIC.     |
| FT        | TRANSMEM                   | 96  | 118 |                  |
| FT        | DOMAIN                     | 119 | 149 | NON CYTOPLASMIC. |
| FT        | TRANSMEM                   | 150 | 170 |                  |
| FT        | DOMAIN                     | 171 | 185 | CYTOPLASMIC.     |
| FT        | TRANSMEM                   | 186 | 206 |                  |
| FT        | DOMAIN                     | 207 | 257 | NON CYTOPLASMIC. |
| FT        | TRANSMEM                   | 258 | 282 |                  |
| FT        | DOMAIN                     | 283 | 294 | CYTOPLASMIC.     |
| FT        | TRANSMEM                   | 295 | 315 |                  |
| FT        | DOMAIN                     | 316 | 369 | NON CYTOPLASMIC. |
| FT        | TRANSMEM                   | 370 | 390 |                  |
| FT        | DOMAIN                     | 391 | 398 | CYTOPLASMIC.     |
| //        |                            |     |     |                  |
| <b>ID</b> | <b>TcasGr39 (AM292360)</b> |     |     |                  |
| FT        | DOMAIN                     | 1   | 85  | NON CYTOPLASMIC. |
| FT        | TRANSMEM                   | 86  | 110 |                  |
| FT        | DOMAIN                     | 111 | 120 | CYTOPLASMIC.     |
| FT        | TRANSMEM                   | 121 | 141 |                  |
| FT        | DOMAIN                     | 142 | 167 | NON CYTOPLASMIC. |
| FT        | TRANSMEM                   | 168 | 190 |                  |
| FT        | DOMAIN                     | 191 | 208 | CYTOPLASMIC.     |
| FT        | TRANSMEM                   | 209 | 228 |                  |
| FT        | DOMAIN                     | 229 | 269 | NON CYTOPLASMIC. |
| FT        | TRANSMEM                   | 270 | 294 |                  |
| FT        | DOMAIN                     | 295 | 306 | CYTOPLASMIC.     |
| FT        | TRANSMEM                   | 307 | 329 |                  |
| FT        | DOMAIN                     | 330 | 385 | NON CYTOPLASMIC. |
| FT        | TRANSMEM                   | 386 | 406 |                  |
| FT        | DOMAIN                     | 407 | 426 | CYTOPLASMIC.     |
| //        |                            |     |     |                  |
| <b>ID</b> | <b>TcasGr40 (AM292361)</b> |     |     |                  |
| FT        | DOMAIN                     | 1   | 61  | NON CYTOPLASMIC. |
| FT        | TRANSMEM                   | 62  | 84  |                  |
| FT        | DOMAIN                     | 85  | 96  | CYTOPLASMIC.     |
| FT        | TRANSMEM                   | 97  | 120 |                  |
| FT        | DOMAIN                     | 121 | 148 | NON CYTOPLASMIC. |
| FT        | TRANSMEM                   | 149 | 170 |                  |
| FT        | DOMAIN                     | 171 | 188 | CYTOPLASMIC.     |
| FT        | TRANSMEM                   | 189 | 210 |                  |
| FT        | DOMAIN                     | 211 | 258 | NON CYTOPLASMIC. |
| FT        | TRANSMEM                   | 259 | 282 |                  |
| FT        | DOMAIN                     | 283 | 307 | CYTOPLASMIC.     |
| FT        | TRANSMEM                   | 308 | 331 |                  |
| FT        | DOMAIN                     | 332 | 349 | NON CYTOPLASMIC. |
| FT        | TRANSMEM                   | 350 | 372 |                  |

|           |                            |     |     |                  |
|-----------|----------------------------|-----|-----|------------------|
| FT        | DOMAIN                     | 373 | 373 | CYTOPLASMIC.     |
| //        |                            |     |     |                  |
| <b>ID</b> | <b>TcasGr41 (AM292362)</b> |     |     |                  |
| FT        | DOMAIN                     | 1   | 39  | NON CYTOPLASMIC. |
| FT        | TRANSMEM                   | 40  | 61  |                  |
| FT        | DOMAIN                     | 62  | 72  | CYTOPLASMIC.     |
| FT        | TRANSMEM                   | 73  | 95  |                  |
| FT        | DOMAIN                     | 96  | 125 | NON CYTOPLASMIC. |
| FT        | TRANSMEM                   | 126 | 148 |                  |
| FT        | DOMAIN                     | 149 | 166 | CYTOPLASMIC.     |
| FT        | TRANSMEM                   | 167 | 187 |                  |
| FT        | DOMAIN                     | 188 | 230 | NON CYTOPLASMIC. |
| FT        | TRANSMEM                   | 231 | 255 |                  |
| FT        | DOMAIN                     | 256 | 269 | CYTOPLASMIC.     |
| FT        | TRANSMEM                   | 270 | 293 |                  |
| FT        | DOMAIN                     | 294 | 314 | NON CYTOPLASMIC. |
| FT        | TRANSMEM                   | 315 | 335 |                  |
| FT        | DOMAIN                     | 336 | 398 | CYTOPLASMIC.     |
| //        |                            |     |     |                  |
| <b>ID</b> | <b>TcasGr71 (AM292363)</b> |     |     |                  |
| FT        | DOMAIN                     | 1   | 29  | NON CYTOPLASMIC. |
| FT        | TRANSMEM                   | 30  | 50  |                  |
| FT        | DOMAIN                     | 51  | 63  | CYTOPLASMIC.     |
| FT        | TRANSMEM                   | 64  | 86  |                  |
| FT        | DOMAIN                     | 87  | 111 | NON CYTOPLASMIC. |
| FT        | TRANSMEM                   | 112 | 135 |                  |
| FT        | DOMAIN                     | 136 | 149 | CYTOPLASMIC.     |
| FT        | TRANSMEM                   | 150 | 169 |                  |
| FT        | DOMAIN                     | 170 | 204 | NON CYTOPLASMIC. |
| FT        | TRANSMEM                   | 205 | 231 |                  |
| FT        | DOMAIN                     | 232 | 246 | CYTOPLASMIC.     |
| FT        | TRANSMEM                   | 247 | 269 |                  |
| FT        | DOMAIN                     | 270 | 320 | NON CYTOPLASMIC. |
| FT        | TRANSMEM                   | 321 | 341 |                  |
| FT        | DOMAIN                     | 342 | 347 | CYTOPLASMIC.     |
| //        |                            |     |     |                  |
| <b>ID</b> | <b>TcasGr43 (AM292364)</b> |     |     |                  |
| FT        | DOMAIN                     | 1   | 33  | NON CYTOPLASMIC. |
| FT        | TRANSMEM                   | 34  | 52  |                  |
| FT        | DOMAIN                     | 53  | 60  | CYTOPLASMIC.     |
| FT        | TRANSMEM                   | 61  | 85  |                  |
| FT        | DOMAIN                     | 86  | 119 | NON CYTOPLASMIC. |
| FT        | TRANSMEM                   | 120 | 141 |                  |
| FT        | DOMAIN                     | 142 | 158 | CYTOPLASMIC.     |
| FT        | TRANSMEM                   | 159 | 178 |                  |
| FT        | DOMAIN                     | 179 | 210 | NON CYTOPLASMIC. |
| FT        | TRANSMEM                   | 211 | 234 |                  |
| FT        | DOMAIN                     | 235 | 253 | CYTOPLASMIC.     |
| FT        | TRANSMEM                   | 254 | 273 |                  |
| FT        | DOMAIN                     | 274 | 325 | NON CYTOPLASMIC. |
| FT        | TRANSMEM                   | 326 | 347 |                  |
| FT        | DOMAIN                     | 348 | 353 | CYTOPLASMIC.     |
| //        |                            |     |     |                  |

|           |                            |      |      |                  |
|-----------|----------------------------|------|------|------------------|
| <b>ID</b> | <b>TcasGr44 (AM292365)</b> |      |      |                  |
| FT        | DOMAIN                     | 1    | 36   | NON CYTOPLASMIC. |
| FT        | TRANSMEM                   | 37   | 55   |                  |
| FT        | DOMAIN                     | 56   | 68   | CYTOPLASMIC.     |
| FT        | TRANSMEM                   | 69   | 92   |                  |
| FT        | DOMAIN                     | 93   | 123  | NON CYTOPLASMIC. |
| FT        | TRANSMEM                   | 124  | 146  |                  |
| FT        | DOMAIN                     | 147  | 159  | CYTOPLASMIC.     |
| FT        | TRANSMEM                   | 160  | 180  |                  |
| FT        | DOMAIN                     | 181  | 196  | NON CYTOPLASMIC. |
| FT        | TRANSMEM                   | 197  | 217  |                  |
| FT        | DOMAIN                     | 218  | 230  | CYTOPLASMIC.     |
| FT        | TRANSMEM                   | 231  | 252  |                  |
| FT        | DOMAIN                     | 253  | 262  | NON CYTOPLASMIC. |
| FT        | TRANSMEM                   | 263  | 285  |                  |
| FT        | DOMAIN                     | 286  | 313  | CYTOPLASMIC.     |
| //        |                            |      |      |                  |
| <b>ID</b> | <b>TcasGr45 (AM292366)</b> |      |      |                  |
| FT        | DOMAIN                     | 1    | 44   | NON CYTOPLASMIC. |
| FT        | TRANSMEM                   | 45   | 64   |                  |
| FT        | DOMAIN                     | 65   | 74   | CYTOPLASMIC.     |
| FT        | TRANSMEM                   | 75   | 97   |                  |
| FT        | DOMAIN                     | 98   | 138  | NON CYTOPLASMIC. |
| FT        | TRANSMEM                   | 139  | 160  |                  |
| FT        | DOMAIN                     | 161  | 173  | CYTOPLASMIC.     |
| FT        | TRANSMEM                   | 174  | 193  |                  |
| FT        | DOMAIN                     | 194  | 231  | NON CYTOPLASMIC. |
| FT        | TRANSMEM                   | 232  | 258  |                  |
| FT        | DOMAIN                     | 259  | 280  | CYTOPLASMIC.     |
| FT        | TRANSMEM                   | 281  | 304  |                  |
| FT        | DOMAIN                     | 305  | 348  | NON CYTOPLASMIC. |
| FT        | TRANSMEM                   | 349  | 370  |                  |
| FT        | DOMAIN                     | 371  | 379  | CYTOPLASMIC.     |
| //        |                            |      |      |                  |
| <b>ID</b> | <b>TcasGr46 (AM292367)</b> |      |      |                  |
| FT        | DOMAIN                     | 1    | 1155 | NON CYTOPLASMIC. |
| FT        | TRANSMEM                   | 1156 | 1175 |                  |
| FT        | DOMAIN                     | 1176 | 1182 | CYTOPLASMIC.     |
| FT        | TRANSMEM                   | 1183 | 1201 |                  |
| FT        | DOMAIN                     | 1202 | 1221 | NON CYTOPLASMIC. |
| FT        | TRANSMEM                   | 1222 | 1245 |                  |
| FT        | DOMAIN                     | 1246 | 1266 | CYTOPLASMIC.     |
| FT        | TRANSMEM                   | 1267 | 1287 |                  |
| FT        | DOMAIN                     | 1288 | 1319 | NON CYTOPLASMIC. |
| FT        | TRANSMEM                   | 1320 | 1345 |                  |
| FT        | DOMAIN                     | 1346 | 1358 | CYTOPLASMIC.     |
| FT        | TRANSMEM                   | 1359 | 1383 |                  |
| FT        | DOMAIN                     | 1384 | 1419 | NON CYTOPLASMIC. |
| FT        | TRANSMEM                   | 1420 | 1442 |                  |
| FT        | DOMAIN                     | 1443 | 1451 | CYTOPLASMIC.     |
| //        |                            |      |      |                  |
| <b>ID</b> | <b>TcasGr47 (AM292354)</b> |      |      |                  |
| FT        | DOMAIN                     | 1    | 19   | NON CYTOPLASMIC. |

|    |          |     |     |                  |
|----|----------|-----|-----|------------------|
| FT | TRANSMEM | 20  | 37  |                  |
| FT | DOMAIN   | 38  | 51  | CYTOPLASMIC.     |
| FT | TRANSMEM | 52  | 71  |                  |
| FT | DOMAIN   | 72  | 98  | NON CYTOPLASMIC. |
| FT | TRANSMEM | 99  | 121 |                  |
| FT | DOMAIN   | 122 | 136 | CYTOPLASMIC.     |
| FT | TRANSMEM | 137 | 158 |                  |
| FT | DOMAIN   | 159 | 186 | NON CYTOPLASMIC. |
| FT | TRANSMEM | 187 | 207 |                  |
| FT | DOMAIN   | 208 | 227 | CYTOPLASMIC.     |
| FT | TRANSMEM | 228 | 251 |                  |
| FT | DOMAIN   | 252 | 278 | NON CYTOPLASMIC. |
| FT | TRANSMEM | 279 | 298 |                  |
| FT | DOMAIN   | 299 | 321 | CYTOPLASMIC.     |

//

**ID TcasGr48 (AM292369)**

|    |          |     |     |                  |
|----|----------|-----|-----|------------------|
| FT | DOMAIN   | 1   | 55  | NON CYTOPLASMIC. |
| FT | TRANSMEM | 56  | 76  |                  |
| FT | DOMAIN   | 77  | 87  | CYTOPLASMIC.     |
| FT | TRANSMEM | 88  | 110 |                  |
| FT | DOMAIN   | 111 | 137 | NON CYTOPLASMIC. |
| FT | TRANSMEM | 138 | 158 |                  |
| FT | DOMAIN   | 159 | 174 | CYTOPLASMIC.     |
| FT | TRANSMEM | 175 | 194 |                  |
| FT | DOMAIN   | 195 | 267 | NON CYTOPLASMIC. |
| FT | TRANSMEM | 268 | 291 |                  |
| FT | DOMAIN   | 292 | 332 | CYTOPLASMIC.     |
| FT | TRANSMEM | 333 | 351 |                  |
| FT | DOMAIN   | 352 | 363 | NON CYTOPLASMIC. |
| FT | TRANSMEM | 364 | 386 |                  |
| FT | DOMAIN   | 387 | 408 | CYTOPLASMIC.     |

//

**ID TcasGr49 (AM292370)**

|    |          |     |     |                  |
|----|----------|-----|-----|------------------|
| FT | DOMAIN   | 1   | 55  | NON CYTOPLASMIC. |
| FT | TRANSMEM | 56  | 76  |                  |
| FT | DOMAIN   | 77  | 86  | CYTOPLASMIC.     |
| FT | TRANSMEM | 87  | 105 |                  |
| FT | DOMAIN   | 106 | 115 | NON CYTOPLASMIC. |
| FT | TRANSMEM | 116 | 135 |                  |
| FT | DOMAIN   | 136 | 157 | CYTOPLASMIC.     |
| FT | TRANSMEM | 158 | 179 |                  |
| FT | DOMAIN   | 180 | 267 | NON CYTOPLASMIC. |
| FT | TRANSMEM | 268 | 294 |                  |
| FT | DOMAIN   | 295 | 311 | CYTOPLASMIC.     |
| FT | TRANSMEM | 312 | 338 |                  |
| FT | DOMAIN   | 339 | 378 | NON CYTOPLASMIC. |
| FT | TRANSMEM | 379 | 400 |                  |
| FT | DOMAIN   | 401 | 418 | CYTOPLASMIC.     |

//

**ID TcasGr50 (AM292371)**

|    |          |    |    |                  |
|----|----------|----|----|------------------|
| FT | DOMAIN   | 1  | 34 | NON CYTOPLASMIC. |
| FT | TRANSMEM | 35 | 55 |                  |
| FT | DOMAIN   | 56 | 65 | CYTOPLASMIC.     |

|           |                            |     |     |                  |
|-----------|----------------------------|-----|-----|------------------|
| FT        | TRANSMEM                   | 66  | 87  |                  |
| FT        | DOMAIN                     | 88  | 116 | NON CYTOPLASMIC. |
| FT        | TRANSMEM                   | 117 | 137 |                  |
| FT        | DOMAIN                     | 138 | 153 | CYTOPLASMIC.     |
| FT        | TRANSMEM                   | 154 | 175 |                  |
| FT        | DOMAIN                     | 176 | 230 | NON CYTOPLASMIC. |
| FT        | TRANSMEM                   | 231 | 255 |                  |
| FT        | DOMAIN                     | 256 | 266 | CYTOPLASMIC.     |
| FT        | TRANSMEM                   | 267 | 287 |                  |
| FT        | DOMAIN                     | 288 | 313 | NON CYTOPLASMIC. |
| FT        | TRANSMEM                   | 314 | 332 |                  |
| FT        | DOMAIN                     | 333 | 350 | CYTOPLASMIC.     |
| //        |                            |     |     |                  |
| <b>ID</b> | <b>TcasGr51 (AM292372)</b> |     |     |                  |
| FT        | DOMAIN                     | 1   | 369 | NON CYTOPLASMIC. |
| FT        | TRANSMEM                   | 370 | 391 |                  |
| FT        | DOMAIN                     | 392 | 403 | CYTOPLASMIC.     |
| FT        | TRANSMEM                   | 404 | 423 |                  |
| FT        | DOMAIN                     | 424 | 437 | NON CYTOPLASMIC. |
| FT        | TRANSMEM                   | 438 | 459 |                  |
| FT        | DOMAIN                     | 460 | 474 | CYTOPLASMIC.     |
| FT        | TRANSMEM                   | 475 | 496 |                  |
| FT        | DOMAIN                     | 497 | 530 | NON CYTOPLASMIC. |
| FT        | TRANSMEM                   | 531 | 555 |                  |
| FT        | DOMAIN                     | 556 | 637 | CYTOPLASMIC.     |
| FT        | TRANSMEM                   | 638 | 659 |                  |
| FT        | DOMAIN                     | 660 | 665 | NON CYTOPLASMIC. |
| FT        | TRANSMEM                   | 666 | 690 |                  |
| FT        | DOMAIN                     | 691 | 771 | CYTOPLASMIC.     |
| //        |                            |     |     |                  |
| <b>ID</b> | <b>TcasGr52 (AM292375)</b> |     |     |                  |
| FT        | DOMAIN                     | 1   | 12  | NON CYTOPLASMIC. |
| FT        | TRANSMEM                   | 13  | 32  |                  |
| FT        | DOMAIN                     | 33  | 38  | CYTOPLASMIC.     |
| FT        | TRANSMEM                   | 39  | 57  |                  |
| FT        | DOMAIN                     | 58  | 73  | NON CYTOPLASMIC. |
| FT        | TRANSMEM                   | 74  | 93  |                  |
| FT        | DOMAIN                     | 94  | 112 | CYTOPLASMIC.     |
| FT        | TRANSMEM                   | 113 | 132 |                  |
| FT        | DOMAIN                     | 133 | 166 | NON CYTOPLASMIC. |
| FT        | TRANSMEM                   | 167 | 187 |                  |
| FT        | DOMAIN                     | 188 | 208 | CYTOPLASMIC.     |
| FT        | TRANSMEM                   | 209 | 230 |                  |
| FT        | DOMAIN                     | 231 | 282 | NON CYTOPLASMIC. |
| FT        | TRANSMEM                   | 283 | 304 |                  |
| FT        | DOMAIN                     | 305 | 311 | CYTOPLASMIC.     |
| //        |                            |     |     |                  |
| <b>ID</b> | <b>TcasGr53 (AM292383)</b> |     |     |                  |
| FT        | DOMAIN                     | 1   | 25  | NON CYTOPLASMIC. |
| FT        | TRANSMEM                   | 26  | 47  |                  |
| FT        | DOMAIN                     | 48  | 57  | CYTOPLASMIC.     |
| FT        | TRANSMEM                   | 58  | 80  |                  |
| FT        | DOMAIN                     | 81  | 107 | NON CYTOPLASMIC. |

|           |                             |     |     |                  |
|-----------|-----------------------------|-----|-----|------------------|
| FT        | TRANSMEM                    | 108 | 129 |                  |
| FT        | DOMAIN                      | 130 | 143 | CYTOPLASMIC.     |
| FT        | TRANSMEM                    | 144 | 164 |                  |
| FT        | DOMAIN                      | 165 | 194 | NON CYTOPLASMIC. |
| FT        | TRANSMEM                    | 195 | 218 |                  |
| FT        | DOMAIN                      | 219 | 236 | CYTOPLASMIC.     |
| FT        | TRANSMEM                    | 237 | 260 |                  |
| FT        | DOMAIN                      | 261 | 283 | NON CYTOPLASMIC. |
| FT        | TRANSMEM                    | 284 | 303 |                  |
| FT        | DOMAIN                      | 304 | 319 | CYTOPLASMIC.     |
| //        |                             |     |     |                  |
| <b>ID</b> | <b>TcasGr54 (AM292373)</b>  |     |     |                  |
| FT        | DOMAIN                      | 1   | 32  | NON CYTOPLASMIC. |
| FT        | TRANSMEM                    | 33  | 52  |                  |
| FT        | DOMAIN                      | 53  | 59  | CYTOPLASMIC.     |
| FT        | TRANSMEM                    | 60  | 80  |                  |
| FT        | DOMAIN                      | 81  | 114 | NON CYTOPLASMIC. |
| FT        | TRANSMEM                    | 115 | 137 |                  |
| FT        | DOMAIN                      | 138 | 154 | CYTOPLASMIC.     |
| FT        | TRANSMEM                    | 155 | 174 |                  |
| FT        | DOMAIN                      | 175 | 217 | NON CYTOPLASMIC. |
| FT        | TRANSMEM                    | 218 | 244 |                  |
| FT        | DOMAIN                      | 245 | 254 | CYTOPLASMIC.     |
| FT        | TRANSMEM                    | 255 | 278 |                  |
| FT        | DOMAIN                      | 279 | 324 | NON CYTOPLASMIC. |
| FT        | TRANSMEM                    | 325 | 347 |                  |
| FT        | DOMAIN                      | 348 | 360 | CYTOPLASMIC.     |
| //        |                             |     |     |                  |
| <b>ID</b> | <b>TcasGr125 (AM292376)</b> |     |     |                  |
| FT        | DOMAIN                      | 1   | 56  | NON CYTOPLASMIC. |
| FT        | TRANSMEM                    | 57  | 77  |                  |
| FT        | DOMAIN                      | 78  | 89  | CYTOPLASMIC.     |
| FT        | TRANSMEM                    | 90  | 112 |                  |
| FT        | DOMAIN                      | 113 | 140 | NON CYTOPLASMIC. |
| FT        | TRANSMEM                    | 141 | 161 |                  |
| FT        | DOMAIN                      | 162 | 175 | CYTOPLASMIC.     |
| FT        | TRANSMEM                    | 176 | 197 |                  |
| FT        | DOMAIN                      | 198 | 240 | NON CYTOPLASMIC. |
| FT        | TRANSMEM                    | 241 | 264 |                  |
| FT        | DOMAIN                      | 265 | 276 | CYTOPLASMIC.     |
| FT        | TRANSMEM                    | 277 | 297 |                  |
| FT        | DOMAIN                      | 298 | 358 | NON CYTOPLASMIC. |
| FT        | TRANSMEM                    | 359 | 381 |                  |
| FT        | DOMAIN                      | 382 | 402 | CYTOPLASMIC.     |
| //        |                             |     |     |                  |
| <b>ID</b> | <b>TcasGr56 (AM292377)</b>  |     |     |                  |
| FT        | DOMAIN                      | 1   | 48  | NON CYTOPLASMIC. |
| FT        | TRANSMEM                    | 49  | 74  |                  |
| FT        | DOMAIN                      | 75  | 89  | CYTOPLASMIC.     |
| FT        | TRANSMEM                    | 90  | 115 |                  |
| FT        | DOMAIN                      | 116 | 143 | NON CYTOPLASMIC. |
| FT        | TRANSMEM                    | 144 | 164 |                  |
| FT        | DOMAIN                      | 165 | 176 | CYTOPLASMIC.     |



|    |          |     |     |                  |
|----|----------|-----|-----|------------------|
| FT | TRANSMEM | 177 | 196 |                  |
| FT | DOMAIN   | 197 | 250 | NON CYTOPLASMIC. |
| FT | TRANSMEM | 251 | 272 |                  |
| FT | DOMAIN   | 273 | 286 | CYTOPLASMIC.     |
| FT | TRANSMEM | 287 | 308 |                  |
| FT | DOMAIN   | 309 | 325 | NON CYTOPLASMIC. |
| FT | TRANSMEM | 326 | 345 |                  |
| FT | DOMAIN   | 346 | 358 | CYTOPLASMIC.     |

//

**ID TcasGr57 (AM292378)**

|    |          |     |     |                  |
|----|----------|-----|-----|------------------|
| FT | DOMAIN   | 1   | 27  | NON CYTOPLASMIC. |
| FT | TRANSMEM | 28  | 51  |                  |
| FT | DOMAIN   | 52  | 64  | CYTOPLASMIC.     |
| FT | TRANSMEM | 65  | 89  |                  |
| FT | DOMAIN   | 90  | 112 | NON CYTOPLASMIC. |
| FT | TRANSMEM | 113 | 134 |                  |
| FT | DOMAIN   | 135 | 151 | CYTOPLASMIC.     |
| FT | TRANSMEM | 152 | 171 |                  |
| FT | DOMAIN   | 172 | 240 | NON CYTOPLASMIC. |
| FT | TRANSMEM | 241 | 265 |                  |
| FT | DOMAIN   | 266 | 281 | CYTOPLASMIC.     |
| FT | TRANSMEM | 282 | 302 |                  |
| FT | DOMAIN   | 303 | 359 | NON CYTOPLASMIC. |
| FT | TRANSMEM | 360 | 382 |                  |
| FT | DOMAIN   | 383 | 387 | CYTOPLASMIC.     |

//

**ID TcasGr98 (AM292379)**

|    |          |     |     |                  |
|----|----------|-----|-----|------------------|
| FT | DOMAIN   | 1   | 43  | NON CYTOPLASMIC. |
| FT | TRANSMEM | 44  | 63  |                  |
| FT | DOMAIN   | 64  | 74  | CYTOPLASMIC.     |
| FT | TRANSMEM | 75  | 97  |                  |
| FT | DOMAIN   | 98  | 132 | NON CYTOPLASMIC. |
| FT | TRANSMEM | 133 | 154 |                  |
| FT | DOMAIN   | 155 | 171 | CYTOPLASMIC.     |
| FT | TRANSMEM | 172 | 191 |                  |
| FT | DOMAIN   | 192 | 228 | NON CYTOPLASMIC. |
| FT | TRANSMEM | 229 | 253 |                  |
| FT | DOMAIN   | 254 | 274 | CYTOPLASMIC.     |
| FT | TRANSMEM | 275 | 295 |                  |
| FT | DOMAIN   | 296 | 345 | NON CYTOPLASMIC. |
| FT | TRANSMEM | 346 | 367 |                  |
| FT | DOMAIN   | 368 | 376 | CYTOPLASMIC.     |

//

**ID TcasGr59 (AM292380)**

|    |          |     |     |                  |
|----|----------|-----|-----|------------------|
| FT | DOMAIN   | 1   | 42  | NON CYTOPLASMIC. |
| FT | TRANSMEM | 43  | 61  |                  |
| FT | DOMAIN   | 62  | 72  | CYTOPLASMIC.     |
| FT | TRANSMEM | 73  | 96  |                  |
| FT | DOMAIN   | 97  | 129 | NON CYTOPLASMIC. |
| FT | TRANSMEM | 130 | 152 |                  |
| FT | DOMAIN   | 153 | 168 | CYTOPLASMIC.     |
| FT | TRANSMEM | 169 | 191 |                  |
| FT | DOMAIN   | 192 | 239 | NON CYTOPLASMIC. |

|           |                            |     |     |                  |
|-----------|----------------------------|-----|-----|------------------|
| FT        | TRANSMEM                   | 240 | 266 |                  |
| FT        | DOMAIN                     | 267 | 282 | CYTOPLASMIC.     |
| FT        | TRANSMEM                   | 283 | 305 |                  |
| FT        | DOMAIN                     | 306 | 348 | NON CYTOPLASMIC. |
| FT        | TRANSMEM                   | 349 | 371 |                  |
| FT        | DOMAIN                     | 372 | 489 | CYTOPLASMIC.     |
| //        |                            |     |     |                  |
| <b>ID</b> | <b>TcasGr60 (AM292381)</b> |     |     |                  |
| FT        | SIGNAL                     | 1   | 16  |                  |
| FT        | DOMAIN                     | 1   | 1   | N-REGION.        |
| FT        | DOMAIN                     | 2   | 11  | H-REGION.        |
| FT        | DOMAIN                     | 12  | 16  | C-REGION.        |
| FT        | DOMAIN                     | 17  | 102 | NON CYTOPLASMIC. |
| FT        | TRANSMEM                   | 103 | 123 |                  |
| FT        | DOMAIN                     | 124 | 136 | CYTOPLASMIC.     |
| FT        | TRANSMEM                   | 137 | 155 |                  |
| FT        | DOMAIN                     | 156 | 182 | NON CYTOPLASMIC. |
| FT        | TRANSMEM                   | 183 | 201 |                  |
| FT        | DOMAIN                     | 202 | 216 | CYTOPLASMIC.     |
| FT        | TRANSMEM                   | 217 | 237 |                  |
| FT        | DOMAIN                     | 238 | 250 | NON CYTOPLASMIC. |
| FT        | TRANSMEM                   | 251 | 272 |                  |
| FT        | DOMAIN                     | 273 | 294 | CYTOPLASMIC.     |
| FT        | TRANSMEM                   | 295 | 315 |                  |
| FT        | DOMAIN                     | 316 | 325 | NON CYTOPLASMIC. |
| FT        | TRANSMEM                   | 326 | 348 |                  |
| FT        | DOMAIN                     | 349 | 364 | CYTOPLASMIC.     |
| //        |                            |     |     |                  |
| <b>ID</b> | <b>TcasGr61 (AM292382)</b> |     |     |                  |
| FT        | SIGNAL                     | 1   | 27  |                  |
| FT        | DOMAIN                     | 1   | 9   | N-REGION.        |
| FT        | DOMAIN                     | 10  | 22  | H-REGION.        |
| FT        | DOMAIN                     | 23  | 27  | C-REGION.        |
| FT        | DOMAIN                     | 28  | 254 | NON CYTOPLASMIC. |
| FT        | TRANSMEM                   | 255 | 277 |                  |
| FT        | DOMAIN                     | 278 | 285 | CYTOPLASMIC.     |
| FT        | TRANSMEM                   | 286 | 305 |                  |
| FT        | DOMAIN                     | 306 | 323 | NON CYTOPLASMIC. |
| FT        | TRANSMEM                   | 324 | 345 |                  |
| FT        | DOMAIN                     | 346 | 362 | CYTOPLASMIC.     |
| FT        | TRANSMEM                   | 363 | 384 |                  |
| FT        | DOMAIN                     | 385 | 416 | NON CYTOPLASMIC. |
| FT        | TRANSMEM                   | 417 | 440 |                  |
| FT        | DOMAIN                     | 441 | 452 | CYTOPLASMIC.     |
| FT        | TRANSMEM                   | 453 | 479 |                  |
| FT        | DOMAIN                     | 480 | 535 | NON CYTOPLASMIC. |
| FT        | TRANSMEM                   | 536 | 558 |                  |
| FT        | DOMAIN                     | 559 | 670 | CYTOPLASMIC.     |
| //        |                            |     |     |                  |
| <b>ID</b> | <b>TcasGr62 (AM292374)</b> |     |     |                  |
| FT        | SIGNAL                     | 1   | 25  |                  |
| FT        | DOMAIN                     | 1   | 9   | N-REGION.        |
| FT        | DOMAIN                     | 10  | 20  | H-REGION.        |

|    |          |     |     |                  |
|----|----------|-----|-----|------------------|
| FT | DOMAIN   | 21  | 25  | C-REGION.        |
| FT | DOMAIN   | 26  | 231 | NON CYTOPLASMIC. |
| FT | TRANSMEM | 232 | 254 |                  |
| FT | DOMAIN   | 255 | 263 | CYTOPLASMIC.     |
| FT | TRANSMEM | 264 | 284 |                  |
| FT | DOMAIN   | 285 | 314 | NON CYTOPLASMIC. |
| FT | TRANSMEM | 315 | 337 |                  |
| FT | DOMAIN   | 338 | 353 | CYTOPLASMIC.     |
| FT | TRANSMEM | 354 | 373 |                  |
| FT | DOMAIN   | 374 | 409 | NON CYTOPLASMIC. |
| FT | TRANSMEM | 410 | 432 |                  |
| FT | DOMAIN   | 433 | 524 | CYTOPLASMIC.     |
| FT | TRANSMEM | 525 | 547 |                  |
| FT | DOMAIN   | 548 | 555 | NON CYTOPLASMIC. |
| FT | TRANSMEM | 556 | 577 |                  |
| FT | DOMAIN   | 578 | 659 | CYTOPLASMIC.     |

//

**ID TcasOr1 (AM689931)**

|    |          |     |     |                  |
|----|----------|-----|-----|------------------|
| FT | DOMAIN   | 1   | 64  | NON CYTOPLASMIC. |
| FT | TRANSMEM | 65  | 84  |                  |
| FT | DOMAIN   | 85  | 96  | CYTOPLASMIC.     |
| FT | TRANSMEM | 97  | 120 |                  |
| FT | DOMAIN   | 121 | 131 | NON CYTOPLASMIC. |
| FT | TRANSMEM | 132 | 157 |                  |
| FT | DOMAIN   | 158 | 177 | CYTOPLASMIC.     |
| FT | TRANSMEM | 178 | 196 |                  |
| FT | DOMAIN   | 197 | 212 | NON CYTOPLASMIC. |
| FT | TRANSMEM | 213 | 239 |                  |
| FT | DOMAIN   | 240 | 288 | CYTOPLASMIC.     |
| FT | TRANSMEM | 289 | 313 |                  |
| FT | DOMAIN   | 314 | 319 | NON CYTOPLASMIC. |
| FT | TRANSMEM | 320 | 341 |                  |
| FT | DOMAIN   | 342 | 353 | CYTOPLASMIC.     |

//

**ID TcasOr2 (AM689904)**

|    |          |     |     |                  |
|----|----------|-----|-----|------------------|
| FT | DOMAIN   | 1   | 20  | NON CYTOPLASMIC. |
| FT | TRANSMEM | 21  | 41  |                  |
| FT | DOMAIN   | 42  | 49  | CYTOPLASMIC.     |
| FT | TRANSMEM | 50  | 69  |                  |
| FT | DOMAIN   | 70  | 100 | NON CYTOPLASMIC. |
| FT | TRANSMEM | 101 | 121 |                  |
| FT | DOMAIN   | 122 | 139 | CYTOPLASMIC.     |
| FT | TRANSMEM | 140 | 160 |                  |
| FT | DOMAIN   | 161 | 184 | NON CYTOPLASMIC. |
| FT | TRANSMEM | 185 | 207 |                  |
| FT | DOMAIN   | 208 | 249 | CYTOPLASMIC.     |
| FT | TRANSMEM | 250 | 272 |                  |
| FT | DOMAIN   | 273 | 282 | NON CYTOPLASMIC. |
| FT | TRANSMEM | 283 | 307 |                  |
| FT | DOMAIN   | 308 | 314 | CYTOPLASMIC.     |

//

**ID TcasOr3 (AM689905)**

|    |        |   |   |                  |
|----|--------|---|---|------------------|
| FT | DOMAIN | 1 | 8 | NON CYTOPLASMIC. |
|----|--------|---|---|------------------|

|           |                           |     |     |                  |
|-----------|---------------------------|-----|-----|------------------|
| FT        | TRANSMEM                  | 9   | 29  |                  |
| FT        | DOMAIN                    | 30  | 41  | CYTOPLASMIC.     |
| FT        | TRANSMEM                  | 42  | 62  |                  |
| FT        | DOMAIN                    | 63  | 95  | NON CYTOPLASMIC. |
| FT        | TRANSMEM                  | 96  | 117 |                  |
| FT        | DOMAIN                    | 118 | 139 | CYTOPLASMIC.     |
| FT        | TRANSMEM                  | 140 | 163 |                  |
| FT        | DOMAIN                    | 164 | 199 | NON CYTOPLASMIC. |
| FT        | TRANSMEM                  | 200 | 225 |                  |
| FT        | DOMAIN                    | 226 | 285 | CYTOPLASMIC.     |
| FT        | TRANSMEM                  | 286 | 307 |                  |
| FT        | DOMAIN                    | 308 | 315 | NON CYTOPLASMIC. |
| FT        | TRANSMEM                  | 316 | 335 |                  |
| FT        | DOMAIN                    | 336 | 413 | CYTOPLASMIC.     |
| //        |                           |     |     |                  |
| <b>ID</b> | <b>TcasOr4 (AM689906)</b> |     |     |                  |
| FT        | DOMAIN                    | 1   | 28  | NON CYTOPLASMIC. |
| FT        | TRANSMEM                  | 29  | 50  |                  |
| FT        | DOMAIN                    | 51  | 58  | CYTOPLASMIC.     |
| FT        | TRANSMEM                  | 59  | 78  |                  |
| FT        | DOMAIN                    | 79  | 88  | NON CYTOPLASMIC. |
| FT        | TRANSMEM                  | 89  | 109 |                  |
| FT        | DOMAIN                    | 110 | 125 | CYTOPLASMIC.     |
| FT        | TRANSMEM                  | 126 | 144 |                  |
| FT        | DOMAIN                    | 145 | 169 | NON CYTOPLASMIC. |
| FT        | TRANSMEM                  | 170 | 197 |                  |
| FT        | DOMAIN                    | 198 | 259 | CYTOPLASMIC.     |
| FT        | TRANSMEM                  | 260 | 281 |                  |
| FT        | DOMAIN                    | 282 | 307 | NON CYTOPLASMIC. |
| FT        | TRANSMEM                  | 308 | 332 |                  |
| FT        | DOMAIN                    | 333 | 378 | CYTOPLASMIC.     |
| //        |                           |     |     |                  |
| <b>ID</b> | <b>TcasOr5 (AM689907)</b> |     |     |                  |
| FT        | DOMAIN                    | 1   | 10  | NON CYTOPLASMIC. |
| FT        | TRANSMEM                  | 11  | 30  |                  |
| FT        | DOMAIN                    | 31  | 44  | CYTOPLASMIC.     |
| FT        | TRANSMEM                  | 45  | 64  |                  |
| FT        | DOMAIN                    | 65  | 76  | NON CYTOPLASMIC. |
| FT        | TRANSMEM                  | 77  | 99  |                  |
| FT        | DOMAIN                    | 100 | 123 | CYTOPLASMIC.     |
| FT        | TRANSMEM                  | 124 | 146 |                  |
| FT        | DOMAIN                    | 147 | 164 | NON CYTOPLASMIC. |
| FT        | TRANSMEM                  | 165 | 188 |                  |
| FT        | DOMAIN                    | 189 | 228 | CYTOPLASMIC.     |
| FT        | TRANSMEM                  | 229 | 250 |                  |
| FT        | DOMAIN                    | 251 | 265 | NON CYTOPLASMIC. |
| FT        | TRANSMEM                  | 266 | 285 |                  |
| FT        | DOMAIN                    | 286 | 299 | CYTOPLASMIC.     |
| //        |                           |     |     |                  |
| <b>ID</b> | <b>TcasOr6 (AM689908)</b> |     |     |                  |
| FT        | SIGNAL                    | 1   | 32  |                  |
| FT        | DOMAIN                    | 1   | 14  | N-REGION.        |
| FT        | DOMAIN                    | 15  | 27  | H-REGION.        |

|    |          |     |     |                  |
|----|----------|-----|-----|------------------|
| FT | DOMAIN   | 28  | 32  | C-REGION.        |
| FT | DOMAIN   | 33  | 100 | NON CYTOPLASMIC. |
| FT | TRANSMEM | 101 | 122 |                  |
| FT | DOMAIN   | 123 | 140 | CYTOPLASMIC.     |
| FT | TRANSMEM | 141 | 165 |                  |
| FT | DOMAIN   | 166 | 181 | NON CYTOPLASMIC. |
| FT | TRANSMEM | 182 | 202 |                  |
| FT | DOMAIN   | 203 | 221 | CYTOPLASMIC.     |
| FT | TRANSMEM | 222 | 243 |                  |
| FT | DOMAIN   | 244 | 270 | NON CYTOPLASMIC. |
| FT | TRANSMEM | 271 | 293 |                  |
| FT | DOMAIN   | 294 | 362 | CYTOPLASMIC.     |
| FT | TRANSMEM | 363 | 384 |                  |
| FT | DOMAIN   | 385 | 409 | NON CYTOPLASMIC. |
| FT | TRANSMEM | 410 | 433 |                  |
| FT | DOMAIN   | 434 | 475 | CYTOPLASMIC.     |

//

**ID TcasOr7 (AM689909)**

|    |          |     |     |                  |
|----|----------|-----|-----|------------------|
| FT | DOMAIN   | 1   | 7   | NON CYTOPLASMIC. |
| FT | TRANSMEM | 8   | 27  |                  |
| FT | DOMAIN   | 28  | 40  | CYTOPLASMIC.     |
| FT | TRANSMEM | 41  | 60  |                  |
| FT | DOMAIN   | 61  | 79  | NON CYTOPLASMIC. |
| FT | TRANSMEM | 80  | 104 |                  |
| FT | DOMAIN   | 105 | 125 | CYTOPLASMIC.     |
| FT | TRANSMEM | 126 | 149 |                  |
| FT | DOMAIN   | 150 | 175 | NON CYTOPLASMIC. |
| FT | TRANSMEM | 176 | 200 |                  |
| FT | DOMAIN   | 201 | 223 | CYTOPLASMIC.     |
| FT | TRANSMEM | 224 | 251 |                  |
| FT | DOMAIN   | 252 | 288 | NON CYTOPLASMIC. |
| FT | TRANSMEM | 289 | 310 |                  |
| FT | DOMAIN   | 311 | 311 | CYTOPLASMIC.     |

//

**ID TcasOr63 (AM689910)**

|    |          |     |     |                  |
|----|----------|-----|-----|------------------|
| FT | DOMAIN   | 1   | 35  | NON CYTOPLASMIC. |
| FT | TRANSMEM | 36  | 62  |                  |
| FT | DOMAIN   | 63  | 73  | CYTOPLASMIC.     |
| FT | TRANSMEM | 74  | 94  |                  |
| FT | DOMAIN   | 95  | 132 | NON CYTOPLASMIC. |
| FT | TRANSMEM | 133 | 154 |                  |
| FT | DOMAIN   | 155 | 171 | CYTOPLASMIC.     |
| FT | TRANSMEM | 172 | 193 |                  |
| FT | DOMAIN   | 194 | 249 | NON CYTOPLASMIC. |
| FT | TRANSMEM | 250 | 273 |                  |
| FT | DOMAIN   | 274 | 284 | CYTOPLASMIC.     |
| FT | TRANSMEM | 285 | 305 |                  |
| FT | DOMAIN   | 306 | 307 | NON CYTOPLASMIC. |
| FT | TRANSMEM | 308 | 329 |                  |
| FT | DOMAIN   | 330 | 383 | CYTOPLASMIC.     |

//

**ID TcasOr9 (AM689911)**

|    |        |   |    |                  |
|----|--------|---|----|------------------|
| FT | DOMAIN | 1 | 55 | NON CYTOPLASMIC. |
|----|--------|---|----|------------------|

|           |                            |     |     |                  |
|-----------|----------------------------|-----|-----|------------------|
| FT        | TRANSMEM                   | 56  | 75  |                  |
| FT        | DOMAIN                     | 76  | 81  | CYTOPLASMIC.     |
| FT        | TRANSMEM                   | 82  | 101 |                  |
| FT        | DOMAIN                     | 102 | 121 | NON CYTOPLASMIC. |
| FT        | TRANSMEM                   | 122 | 143 |                  |
| FT        | DOMAIN                     | 144 | 160 | CYTOPLASMIC.     |
| FT        | TRANSMEM                   | 161 | 182 |                  |
| FT        | DOMAIN                     | 183 | 196 | NON CYTOPLASMIC. |
| FT        | TRANSMEM                   | 197 | 219 |                  |
| FT        | DOMAIN                     | 220 | 229 | CYTOPLASMIC.     |
| FT        | TRANSMEM                   | 230 | 252 |                  |
| FT        | DOMAIN                     | 253 | 259 | NON CYTOPLASMIC. |
| FT        | TRANSMEM                   | 260 | 280 |                  |
| FT        | DOMAIN                     | 281 | 294 | CYTOPLASMIC.     |
| //        |                            |     |     |                  |
| <b>ID</b> | <b>TcasOr10 (AM689912)</b> |     |     |                  |
| FT        | DOMAIN                     | 1   | 44  | NON CYTOPLASMIC. |
| FT        | TRANSMEM                   | 45  | 67  |                  |
| FT        | DOMAIN                     | 68  | 86  | CYTOPLASMIC.     |
| FT        | TRANSMEM                   | 87  | 106 |                  |
| FT        | DOMAIN                     | 107 | 121 | NON CYTOPLASMIC. |
| FT        | TRANSMEM                   | 122 | 142 |                  |
| FT        | DOMAIN                     | 143 | 160 | CYTOPLASMIC.     |
| FT        | TRANSMEM                   | 161 | 183 |                  |
| FT        | DOMAIN                     | 184 | 199 | NON CYTOPLASMIC. |
| FT        | TRANSMEM                   | 200 | 223 |                  |
| FT        | DOMAIN                     | 224 | 262 | CYTOPLASMIC.     |
| FT        | TRANSMEM                   | 263 | 287 |                  |
| FT        | DOMAIN                     | 288 | 302 | NON CYTOPLASMIC. |
| FT        | TRANSMEM                   | 303 | 324 |                  |
| FT        | DOMAIN                     | 325 | 330 | CYTOPLASMIC.     |
| //        |                            |     |     |                  |
| <b>ID</b> | <b>TcasOr11 (AM689913)</b> |     |     |                  |
| FT        | DOMAIN                     | 1   | 31  | NON CYTOPLASMIC. |
| FT        | TRANSMEM                   | 32  | 53  |                  |
| FT        | DOMAIN                     | 54  | 65  | CYTOPLASMIC.     |
| FT        | TRANSMEM                   | 66  | 88  |                  |
| FT        | DOMAIN                     | 89  | 113 | NON CYTOPLASMIC. |
| FT        | TRANSMEM                   | 114 | 136 |                  |
| FT        | DOMAIN                     | 137 | 159 | CYTOPLASMIC.     |
| FT        | TRANSMEM                   | 160 | 180 |                  |
| FT        | DOMAIN                     | 181 | 237 | NON CYTOPLASMIC. |
| FT        | TRANSMEM                   | 238 | 261 |                  |
| FT        | DOMAIN                     | 262 | 286 | CYTOPLASMIC.     |
| FT        | TRANSMEM                   | 287 | 305 |                  |
| FT        | DOMAIN                     | 306 | 308 | NON CYTOPLASMIC. |
| FT        | TRANSMEM                   | 309 | 329 |                  |
| FT        | DOMAIN                     | 330 | 332 | CYTOPLASMIC.     |
| //        |                            |     |     |                  |
| <b>ID</b> | <b>TcasOr12 (AM689914)</b> |     |     |                  |
| FT        | DOMAIN                     | 1   | 8   | NON CYTOPLASMIC. |
| FT        | TRANSMEM                   | 9   | 27  |                  |
| FT        | DOMAIN                     | 28  | 38  | CYTOPLASMIC.     |

|           |                            |     |     |                  |
|-----------|----------------------------|-----|-----|------------------|
| FT        | TRANSMEM                   | 39  | 63  |                  |
| FT        | DOMAIN                     | 64  | 89  | NON CYTOPLASMIC. |
| FT        | TRANSMEM                   | 90  | 113 |                  |
| FT        | DOMAIN                     | 114 | 131 | CYTOPLASMIC.     |
| FT        | TRANSMEM                   | 132 | 154 |                  |
| FT        | DOMAIN                     | 155 | 188 | NON CYTOPLASMIC. |
| FT        | TRANSMEM                   | 189 | 212 |                  |
| FT        | DOMAIN                     | 213 | 263 | CYTOPLASMIC.     |
| FT        | TRANSMEM                   | 264 | 287 |                  |
| FT        | DOMAIN                     | 288 | 293 | NON CYTOPLASMIC. |
| FT        | TRANSMEM                   | 294 | 315 |                  |
| FT        | DOMAIN                     | 316 | 374 | CYTOPLASMIC.     |
| //        |                            |     |     |                  |
| <b>ID</b> | <b>TcasOr13 (AM689915)</b> |     |     |                  |
| FT        | DOMAIN                     | 1   | 47  | NON CYTOPLASMIC. |
| FT        | TRANSMEM                   | 48  | 68  |                  |
| FT        | DOMAIN                     | 69  | 77  | CYTOPLASMIC.     |
| FT        | TRANSMEM                   | 78  | 101 |                  |
| FT        | DOMAIN                     | 102 | 140 | NON CYTOPLASMIC. |
| FT        | TRANSMEM                   | 141 | 162 |                  |
| FT        | DOMAIN                     | 163 | 178 | CYTOPLASMIC.     |
| FT        | TRANSMEM                   | 179 | 200 |                  |
| FT        | DOMAIN                     | 201 | 266 | NON CYTOPLASMIC. |
| FT        | TRANSMEM                   | 267 | 290 |                  |
| FT        | DOMAIN                     | 291 | 306 | CYTOPLASMIC.     |
| FT        | TRANSMEM                   | 307 | 326 |                  |
| FT        | DOMAIN                     | 327 | 379 | NON CYTOPLASMIC. |
| FT        | TRANSMEM                   | 380 | 401 |                  |
| FT        | DOMAIN                     | 402 | 405 | CYTOPLASMIC.     |
| //        |                            |     |     |                  |
| <b>ID</b> | <b>TcasOr56 (AM689916)</b> |     |     |                  |
| FT        | DOMAIN                     | 1   | 38  | NON CYTOPLASMIC. |
| FT        | TRANSMEM                   | 39  | 60  |                  |
| FT        | DOMAIN                     | 61  | 71  | CYTOPLASMIC.     |
| FT        | TRANSMEM                   | 72  | 92  |                  |
| FT        | DOMAIN                     | 93  | 134 | NON CYTOPLASMIC. |
| FT        | TRANSMEM                   | 135 | 154 |                  |
| FT        | DOMAIN                     | 155 | 169 | CYTOPLASMIC.     |
| FT        | TRANSMEM                   | 170 | 189 |                  |
| FT        | DOMAIN                     | 190 | 213 | NON CYTOPLASMIC. |
| FT        | TRANSMEM                   | 214 | 236 |                  |
| FT        | DOMAIN                     | 237 | 306 | CYTOPLASMIC.     |
| FT        | TRANSMEM                   | 307 | 330 |                  |
| FT        | DOMAIN                     | 331 | 336 | NON CYTOPLASMIC. |
| FT        | TRANSMEM                   | 337 | 358 |                  |
| FT        | DOMAIN                     | 359 | 433 | CYTOPLASMIC.     |
| //        |                            |     |     |                  |
| <b>ID</b> | <b>TcasOr15 (AM689917)</b> |     |     |                  |
| FT        | DOMAIN                     | 1   | 36  | NON CYTOPLASMIC. |
| FT        | TRANSMEM                   | 37  | 62  |                  |
| FT        | DOMAIN                     | 63  | 69  | CYTOPLASMIC.     |
| FT        | TRANSMEM                   | 70  | 89  |                  |
| FT        | DOMAIN                     | 90  | 99  | NON CYTOPLASMIC. |

|           |                            |     |     |                  |
|-----------|----------------------------|-----|-----|------------------|
| FT        | TRANSMEM                   | 100 | 123 |                  |
| FT        | DOMAIN                     | 124 | 136 | CYTOPLASMIC.     |
| FT        | TRANSMEM                   | 137 | 156 |                  |
| FT        | DOMAIN                     | 157 | 199 | NON CYTOPLASMIC. |
| FT        | TRANSMEM                   | 200 | 227 |                  |
| FT        | DOMAIN                     | 228 | 243 | CYTOPLASMIC.     |
| FT        | TRANSMEM                   | 244 | 266 |                  |
| FT        | DOMAIN                     | 267 | 301 | NON CYTOPLASMIC. |
| FT        | TRANSMEM                   | 302 | 325 |                  |
| FT        | DOMAIN                     | 326 | 340 | CYTOPLASMIC.     |
| //        |                            |     |     |                  |
| <b>ID</b> | <b>TcasOr16 (AM689918)</b> |     |     |                  |
| FT        | DOMAIN                     | 1   | 203 | NON CYTOPLASMIC. |
| FT        | TRANSMEM                   | 204 | 228 |                  |
| FT        | DOMAIN                     | 229 | 241 | CYTOPLASMIC.     |
| FT        | TRANSMEM                   | 242 | 263 |                  |
| FT        | DOMAIN                     | 264 | 298 | NON CYTOPLASMIC. |
| FT        | TRANSMEM                   | 299 | 321 |                  |
| FT        | DOMAIN                     | 322 | 336 | CYTOPLASMIC.     |
| FT        | TRANSMEM                   | 337 | 357 |                  |
| FT        | DOMAIN                     | 358 | 379 | NON CYTOPLASMIC. |
| FT        | TRANSMEM                   | 380 | 400 |                  |
| FT        | DOMAIN                     | 401 | 426 | CYTOPLASMIC.     |
| FT        | TRANSMEM                   | 427 | 447 |                  |
| FT        | DOMAIN                     | 448 | 449 | NON CYTOPLASMIC. |
| FT        | TRANSMEM                   | 450 | 471 |                  |
| FT        | DOMAIN                     | 472 | 475 | CYTOPLASMIC.     |
| //        |                            |     |     |                  |
| <b>ID</b> | <b>TcasOr17 (AM689919)</b> |     |     |                  |
| FT        | DOMAIN                     | 1   | 3   | NON CYTOPLASMIC. |
| FT        | TRANSMEM                   | 4   | 22  |                  |
| FT        | DOMAIN                     | 23  | 29  | CYTOPLASMIC.     |
| FT        | TRANSMEM                   | 30  | 47  |                  |
| FT        | DOMAIN                     | 48  | 59  | NON CYTOPLASMIC. |
| FT        | TRANSMEM                   | 60  | 80  |                  |
| FT        | DOMAIN                     | 81  | 93  | CYTOPLASMIC.     |
| FT        | TRANSMEM                   | 94  | 112 |                  |
| FT        | DOMAIN                     | 113 | 127 | NON CYTOPLASMIC. |
| FT        | TRANSMEM                   | 128 | 149 |                  |
| FT        | DOMAIN                     | 150 | 175 | CYTOPLASMIC.     |
| FT        | TRANSMEM                   | 176 | 195 |                  |
| FT        | DOMAIN                     | 196 | 197 | NON CYTOPLASMIC. |
| FT        | TRANSMEM                   | 198 | 217 |                  |
| FT        | DOMAIN                     | 218 | 243 | CYTOPLASMIC.     |
| //        |                            |     |     |                  |
| <b>ID</b> | <b>TcasOr18 (AM689920)</b> |     |     |                  |
| FT        | DOMAIN                     | 1   | 32  | NON CYTOPLASMIC. |
| FT        | TRANSMEM                   | 33  | 58  |                  |
| FT        | DOMAIN                     | 59  | 66  | CYTOPLASMIC.     |
| FT        | TRANSMEM                   | 67  | 86  |                  |
| FT        | DOMAIN                     | 87  | 115 | NON CYTOPLASMIC. |
| FT        | TRANSMEM                   | 116 | 136 |                  |
| FT        | DOMAIN                     | 137 | 157 | CYTOPLASMIC.     |



|           |                            |     |     |                  |
|-----------|----------------------------|-----|-----|------------------|
| FT        | TRANSMEM                   | 158 | 179 |                  |
| FT        | DOMAIN                     | 180 | 238 | NON CYTOPLASMIC. |
| FT        | TRANSMEM                   | 239 | 259 |                  |
| FT        | DOMAIN                     | 260 | 282 | CYTOPLASMIC.     |
| FT        | TRANSMEM                   | 283 | 304 |                  |
| FT        | DOMAIN                     | 305 | 324 | NON CYTOPLASMIC. |
| FT        | TRANSMEM                   | 325 | 346 |                  |
| FT        | DOMAIN                     | 347 | 410 | CYTOPLASMIC.     |
| //        |                            |     |     |                  |
| <b>ID</b> | <b>TcasOr19 (AM689921)</b> |     |     |                  |
| FT        | DOMAIN                     | 1   | 38  | NON CYTOPLASMIC. |
| FT        | TRANSMEM                   | 39  | 57  |                  |
| FT        | DOMAIN                     | 58  | 62  | CYTOPLASMIC.     |
| FT        | TRANSMEM                   | 63  | 81  |                  |
| FT        | DOMAIN                     | 82  | 93  | NON CYTOPLASMIC. |
| FT        | TRANSMEM                   | 94  | 114 |                  |
| FT        | DOMAIN                     | 115 | 136 | CYTOPLASMIC.     |
| FT        | TRANSMEM                   | 137 | 159 |                  |
| FT        | DOMAIN                     | 160 | 219 | NON CYTOPLASMIC. |
| FT        | TRANSMEM                   | 220 | 242 |                  |
| FT        | DOMAIN                     | 243 | 254 | CYTOPLASMIC.     |
| FT        | TRANSMEM                   | 255 | 276 |                  |
| FT        | DOMAIN                     | 277 | 310 | NON CYTOPLASMIC. |
| FT        | TRANSMEM                   | 311 | 330 |                  |
| FT        | DOMAIN                     | 331 | 331 | CYTOPLASMIC.     |
| //        |                            |     |     |                  |
| <b>ID</b> | <b>TcasOr20 (AM689922)</b> |     |     |                  |
| FT        | DOMAIN                     | 1   | 58  | NON CYTOPLASMIC. |
| FT        | TRANSMEM                   | 59  | 80  |                  |
| FT        | DOMAIN                     | 81  | 90  | CYTOPLASMIC.     |
| FT        | TRANSMEM                   | 91  | 111 |                  |
| FT        | DOMAIN                     | 112 | 151 | NON CYTOPLASMIC. |
| FT        | TRANSMEM                   | 152 | 169 |                  |
| FT        | DOMAIN                     | 170 | 186 | CYTOPLASMIC.     |
| FT        | TRANSMEM                   | 187 | 211 |                  |
| FT        | DOMAIN                     | 212 | 256 | NON CYTOPLASMIC. |
| FT        | TRANSMEM                   | 257 | 279 |                  |
| FT        | DOMAIN                     | 280 | 290 | CYTOPLASMIC.     |
| FT        | TRANSMEM                   | 291 | 311 |                  |
| FT        | DOMAIN                     | 312 | 360 | NON CYTOPLASMIC. |
| FT        | TRANSMEM                   | 361 | 381 |                  |
| FT        | DOMAIN                     | 382 | 386 | CYTOPLASMIC.     |
| //        |                            |     |     |                  |
| <b>ID</b> | <b>TcasOr21 (AM689923)</b> |     |     |                  |
| FT        | DOMAIN                     | 1   | 5   | NON CYTOPLASMIC. |
| FT        | TRANSMEM                   | 6   | 23  |                  |
| FT        | DOMAIN                     | 24  | 30  | CYTOPLASMIC.     |
| FT        | TRANSMEM                   | 31  | 48  |                  |
| FT        | DOMAIN                     | 49  | 58  | NON CYTOPLASMIC. |
| FT        | TRANSMEM                   | 59  | 79  |                  |
| FT        | DOMAIN                     | 80  | 92  | CYTOPLASMIC.     |
| FT        | TRANSMEM                   | 93  | 112 |                  |
| FT        | DOMAIN                     | 113 | 127 | NON CYTOPLASMIC. |

|           |                            |     |     |                  |
|-----------|----------------------------|-----|-----|------------------|
| FT        | TRANSMEM                   | 128 | 149 |                  |
| FT        | DOMAIN                     | 150 | 173 | CYTOPLASMIC.     |
| FT        | TRANSMEM                   | 174 | 193 |                  |
| FT        | DOMAIN                     | 194 | 195 | NON CYTOPLASMIC. |
| FT        | TRANSMEM                   | 196 | 215 |                  |
| FT        | DOMAIN                     | 216 | 240 | CYTOPLASMIC.     |
| //        |                            |     |     |                  |
| <b>ID</b> | <b>TcasOr22 (AM689924)</b> |     |     |                  |
| FT        | DOMAIN                     | 1   | 33  | NON CYTOPLASMIC. |
| FT        | TRANSMEM                   | 34  | 55  |                  |
| FT        | DOMAIN                     | 56  | 63  | CYTOPLASMIC.     |
| FT        | TRANSMEM                   | 64  | 86  |                  |
| FT        | DOMAIN                     | 87  | 115 | NON CYTOPLASMIC. |
| FT        | TRANSMEM                   | 116 | 136 |                  |
| FT        | DOMAIN                     | 137 | 154 | CYTOPLASMIC.     |
| FT        | TRANSMEM                   | 155 | 176 |                  |
| FT        | DOMAIN                     | 177 | 252 | NON CYTOPLASMIC. |
| FT        | TRANSMEM                   | 253 | 276 |                  |
| FT        | DOMAIN                     | 277 | 292 | CYTOPLASMIC.     |
| FT        | TRANSMEM                   | 293 | 313 |                  |
| FT        | DOMAIN                     | 314 | 347 | NON CYTOPLASMIC. |
| FT        | TRANSMEM                   | 348 | 368 |                  |
| FT        | DOMAIN                     | 369 | 382 | CYTOPLASMIC.     |
| //        |                            |     |     |                  |
| <b>ID</b> | <b>TcasOr23 (AM689925)</b> |     |     |                  |
| FT        | DOMAIN                     | 1   | 33  | NON CYTOPLASMIC. |
| FT        | TRANSMEM                   | 34  | 55  |                  |
| FT        | DOMAIN                     | 56  | 63  | CYTOPLASMIC.     |
| FT        | TRANSMEM                   | 64  | 86  |                  |
| FT        | DOMAIN                     | 87  | 112 | NON CYTOPLASMIC. |
| FT        | TRANSMEM                   | 113 | 136 |                  |
| FT        | DOMAIN                     | 137 | 153 | CYTOPLASMIC.     |
| FT        | TRANSMEM                   | 154 | 174 |                  |
| FT        | DOMAIN                     | 175 | 187 | NON CYTOPLASMIC. |
| FT        | TRANSMEM                   | 188 | 211 |                  |
| FT        | DOMAIN                     | 212 | 254 | CYTOPLASMIC.     |
| FT        | TRANSMEM                   | 255 | 276 |                  |
| FT        | DOMAIN                     | 277 | 278 | NON CYTOPLASMIC. |
| FT        | TRANSMEM                   | 279 | 298 |                  |
| FT        | DOMAIN                     | 299 | 360 | CYTOPLASMIC.     |
| //        |                            |     |     |                  |
| <b>ID</b> | <b>TcasOr24 (AM689926)</b> |     |     |                  |
| FT        | DOMAIN                     | 1   | 39  | NON CYTOPLASMIC. |
| FT        | TRANSMEM                   | 40  | 60  |                  |
| FT        | DOMAIN                     | 61  | 69  | CYTOPLASMIC.     |
| FT        | TRANSMEM                   | 70  | 92  |                  |
| FT        | DOMAIN                     | 93  | 136 | NON CYTOPLASMIC. |
| FT        | TRANSMEM                   | 137 | 160 |                  |
| FT        | DOMAIN                     | 161 | 182 | CYTOPLASMIC.     |
| FT        | TRANSMEM                   | 183 | 203 |                  |
| FT        | DOMAIN                     | 204 | 251 | NON CYTOPLASMIC. |
| FT        | TRANSMEM                   | 252 | 277 |                  |
| FT        | DOMAIN                     | 278 | 288 | CYTOPLASMIC.     |

|           |                            |     |     |                  |
|-----------|----------------------------|-----|-----|------------------|
| FT        | TRANSMEM                   | 289 | 311 |                  |
| FT        | DOMAIN                     | 312 | 323 | NON CYTOPLASMIC. |
| FT        | TRANSMEM                   | 324 | 342 |                  |
| FT        | DOMAIN                     | 343 | 343 | CYTOPLASMIC.     |
| //        |                            |     |     |                  |
| <b>ID</b> | <b>TcasOr25 (AM689927)</b> |     |     |                  |
| FT        | DOMAIN                     | 1   | 383 | NON CYTOPLASMIC. |
| FT        | TRANSMEM                   | 384 | 408 |                  |
| FT        | DOMAIN                     | 409 | 421 | CYTOPLASMIC.     |
| FT        | TRANSMEM                   | 422 | 440 |                  |
| FT        | DOMAIN                     | 441 | 469 | NON CYTOPLASMIC. |
| FT        | TRANSMEM                   | 470 | 492 |                  |
| FT        | DOMAIN                     | 493 | 508 | CYTOPLASMIC.     |
| FT        | TRANSMEM                   | 509 | 530 |                  |
| FT        | DOMAIN                     | 531 | 551 | NON CYTOPLASMIC. |
| FT        | TRANSMEM                   | 552 | 575 |                  |
| FT        | DOMAIN                     | 576 | 614 | CYTOPLASMIC.     |
| FT        | TRANSMEM                   | 615 | 637 |                  |
| FT        | DOMAIN                     | 638 | 752 | NON CYTOPLASMIC. |
| FT        | TRANSMEM                   | 753 | 775 |                  |
| FT        | DOMAIN                     | 776 | 791 | CYTOPLASMIC.     |
| //        |                            |     |     |                  |
| <b>ID</b> | <b>TcasOr26 (AM689928)</b> |     |     |                  |
| FT        | DOMAIN                     | 1   | 25  | NON CYTOPLASMIC. |
| FT        | TRANSMEM                   | 26  | 46  |                  |
| FT        | DOMAIN                     | 47  | 53  | CYTOPLASMIC.     |
| FT        | TRANSMEM                   | 54  | 72  |                  |
| FT        | DOMAIN                     | 73  | 82  | NON CYTOPLASMIC. |
| FT        | TRANSMEM                   | 83  | 101 |                  |
| FT        | DOMAIN                     | 102 | 114 | CYTOPLASMIC.     |
| FT        | TRANSMEM                   | 115 | 134 |                  |
| FT        | DOMAIN                     | 135 | 167 | NON CYTOPLASMIC. |
| FT        | TRANSMEM                   | 168 | 191 |                  |
| FT        | DOMAIN                     | 192 | 248 | CYTOPLASMIC.     |
| FT        | TRANSMEM                   | 249 | 269 |                  |
| FT        | DOMAIN                     | 270 | 304 | NON CYTOPLASMIC. |
| FT        | TRANSMEM                   | 305 | 324 |                  |
| FT        | DOMAIN                     | 325 | 338 | CYTOPLASMIC.     |

# C

|            |                                                                 |
|------------|-----------------------------------------------------------------|
| TcasGr38   | -----                                                           |
| TcasGr46   | -----                                                           |
| TcasGr1    | -----                                                           |
| TcasGr123  | -----                                                           |
| TcasGr62   | MMDRINHKKFINTTKLLWCDQITIGLITFDINTPSFKLSKIRSFLNITASAVLLPFAIYH 60 |
| TcasGr25   | -----                                                           |
| TcasGr59   | -----                                                           |
| AgamGr2    | -----                                                           |
| AaegGr66a  | -----                                                           |
| DmelGr66a  | -----                                                           |
| TcasGr11   | -----                                                           |
| TcasGr55   | -----                                                           |
| TcasGr21   | -----                                                           |
| TcasGr56   | -----                                                           |
| AaegGr     | -----                                                           |
| AaegGr28a  | -----                                                           |
| AgamGr33   | -----                                                           |
| DmelGr28bB | -----                                                           |
| DmelGr28bC | -----                                                           |
| DmelGr28bD | -----                                                           |
| DmelGr28bA | -----                                                           |
| DmelGr28bE | -----                                                           |
| AgamGr25   | -----                                                           |
| AaegGr43a  | -----                                                           |
| DmelGr43a  | -----                                                           |
| AgamGr37b  | -----                                                           |
| AgamGr37d  | -----                                                           |
| AgamGr37a  | -----                                                           |
| AgamGr37c  | -----                                                           |
| AgamGr37e  | -----                                                           |
| AgamGr37f  | -----                                                           |
| AaegGr28c  | -----                                                           |
| AaegGr28b  | -----                                                           |
| AaegGr28e  | -----                                                           |
| TcasGr14   | -----                                                           |
| TcasGr49   | -----                                                           |
| AmelGr4    | -----                                                           |
| AmelGr5    | -----                                                           |
| TcasGr16   | -----                                                           |
| TcasGr22   | -----                                                           |
| TcasGr17   | -----                                                           |
| TcasGr150  | -----                                                           |
| TcasGr32   | -----                                                           |
| TcasGr54   | -----                                                           |
| TcasGr37   | -----                                                           |
| TcasGr53   | -----                                                           |
| TcasGr5    | -----                                                           |
| TcasGr12   | -----                                                           |
| TcasGr13   | -----                                                           |
| TcasGr104  | -----                                                           |
| TcasGr45   | -----                                                           |
| TcasGr98   | -----                                                           |
| TcasGr52   | -----                                                           |
| TcasGr105  | -----                                                           |
| TcasGr4    | -----                                                           |
| TcasGr44   | -----                                                           |
| AgamGr9a   | -----                                                           |
| AgamGr9c   | -----                                                           |
| AgamGr9b   | -----                                                           |
| AgamGr9d   | -----                                                           |
| AgamGr9e   | -----                                                           |
| AgamGr9f   | -----                                                           |
| AgamGr9g   | -----                                                           |
| AgamGr9i   | -----                                                           |
| AgamGr9h   | -----                                                           |
| AgamGr9j   | -----                                                           |
| AgamGr9l   | -----                                                           |
| AgamGr9k   | -----                                                           |

AgamGr9m -----  
AgamGr9n -----  
AgamGr10 -----  
AgamGr11 -----  
DmelGr23aA -----  
DmelGr23aB -----  
DmelGr39aA -----  
DmelGr39aB -----  
DmelGr39aC -----  
DmelGr39aD -----  
DmelGr98c -----  
DmelGr98d -----  
DmelGr98b -----  
AgamGr51 -----  
AgamGr52 -----  
DmelGr94a -----  
DmelGr97a -----  
DmelGr93b -----  
DmelGr93c -----  
DmelGr22d -----  
DmelGr22e -----  
DmelGr22a -----  
DmelGr22b -----  
DmelGr22c -----  
DmelGr22f -----  
DmelGr36a -----  
DmelGr36c -----  
DmelGr36b -----  
DmelGr59d -----  
DmelGr59a -----  
DmelGr59b -----  
AgamGr26 -----  
AgamGr27 -----  
AgamGr29 -----  
AgamGr31 -----  
AgamGr30 -----  
AgamGr32a -----  
TcasGr2 -----  
TcasGr9 -----  
TcasGr7 -----  
TcasGr30 -----  
TcasGr29 -----  
AaegGr64f -----  
AaegGr64a3 -----  
AgamGr14 -----  
AgamGr18 -----  
AaegGr64d -----  
AgamGr17 -----  
AaegGr64c -----  
DmelGr64c -----  
DmelGr64d -----  
AgamGr20 -----  
AaegGr61a -----  
AgamGr21 -----  
AaegGr64a -----  
DmelGr64a -----  
DmelGr61a -----  
AgamGr15 -----  
AaegGr1 -----  
DmelGr5a -----  
DmelGr64f -----  
DmelGr64e -----  
Ame1Gr1 -----  
Ame1Gr2 -----  
AgamGr16 -----  
AaegGr64e -----  
TCasGr6 -----  
TcasGr26 -----  
TcasGr33 -----  
AgamGr23 -----

|           |                                                       |        |
|-----------|-------------------------------------------------------|--------|
| AaegGr21a | -----                                                 |        |
| TcasGr10  | -----                                                 |        |
| TcasGr39  | -----                                                 |        |
| AgamGr22  | -----                                                 |        |
| AaegGr21b | -----                                                 |        |
| DmelGr21a | -----                                                 |        |
| AgamGr24  | -----                                                 |        |
| AaegGr63a | -----                                                 |        |
| DmelGr63a | -----                                                 |        |
| TcasGr3   | -----                                                 |        |
| DmelOr83b | -----                                                 |        |
| AgamOr7   | -----                                                 |        |
| HvirOr2   | -----                                                 |        |
| TcasOr16  | -----MSKIALNNPKSEYPSK-----                            | QDP 19 |
| TcasOr22  | -----MSKIALNNPKSEYPSKYRPRPHRSIPAPQDP                  | 31     |
| AmelOr2   | -----                                                 |        |
| TcasGr31  | -----                                                 |        |
| TcasGr35  | -----                                                 |        |
| DmelGr59c | -----                                                 |        |
| DmelGr92a | -----                                                 |        |
| DmelGr28a | -----                                                 |        |
| DmelGr64b | -----                                                 |        |
| TcasGr71  | -----                                                 |        |
| AgamGr19  | -----                                                 |        |
| AaegGr64b | -----                                                 |        |
| DmelGr93d | -----                                                 |        |
| TcasGr34  | -----                                                 |        |
| TcasGr43  | -----                                                 |        |
| TcasGr47  | -----                                                 |        |
| AmelGr3   | -----                                                 |        |
| AgamGr32b | -----                                                 |        |
| AgamGr50  | -----                                                 |        |
| TcasGr20  | -----                                                 |        |
| TcasGr79  | -----                                                 |        |
| TcasGr15  | -----                                                 |        |
| TcasGr60  | -----                                                 |        |
| AgamGr38  | -----                                                 |        |
| TcasGr51  | -----MNMILKLSLKDIVFINPLVKYLNIFFITPWYDFPTNQKYYPSLAKCYA | 48     |
| DmelGr39b | -----                                                 |        |
| AgamGr28  | -----                                                 |        |
| TcasGr61  | -----                                                 |        |
| TcasGr50  | -----                                                 |        |
| AgamGr12  | -----                                                 |        |
| AgamGr36  | -----                                                 |        |
| AgamGr48  | -----                                                 |        |
| AgamGr49a | -----                                                 |        |
| AgamGr49b | -----                                                 |        |
| DmelGr2a  | -----                                                 |        |
| DmelGr32a | -----                                                 |        |
| DmelGr68a | -----                                                 |        |
| AmelGr7   | -----                                                 |        |
| AmelGr8   | -----                                                 |        |
| AmelGr9   | -----                                                 |        |
| TcasGr57  | -----                                                 |        |
| TcasGr41  | -----                                                 |        |
| AgamGr34  | -----                                                 |        |
| AgamGr35  | -----                                                 |        |
| AgamGr39  | -----                                                 |        |
| AgamGr40  | -----                                                 |        |
| AaegGr28d | -----                                                 |        |
| AgamGr42  | -----                                                 |        |
| AgamGr41  | -----                                                 |        |
| AgamGr43  | -----                                                 |        |
| DmelGr33a | -----                                                 |        |
| AgamGr44  | -----                                                 |        |
| AgamGr13  | -----                                                 |        |
| AgamGr45  | -----                                                 |        |
| AgamGr46  | -----                                                 |        |
| Dmelr93a  | -----                                                 |        |
| AmelGr6   | -----                                                 |        |

AmelGr10 -----  
 TcasGr28 -----  
 TcasGr40 -----  
 AgamGr3 -----  
 AgamGr4 -----  
 AgamGr6 -----  
 AgamGr7 -----  
 AgamGr47 -----  
 DmelGr8a -----  
 AgamGr5 -----  
 AgamGr8 -----  
 DmelGr9a -----  
 DmelGr59f -----  
 DmelGr77a -----  
 DmelGr85a -----  
 TcasGr27 -----  
 TcasGr48 -----  
 AgamGr1 -----  
 DmelGr10a -----  
 DmelGr59e -----  
 DmelGr10b -----  
 DmelGr89a -----  
 DmelGr57a -----  
 DmelGr47b -----  
 DmelGr58a -----  
 DmelGr58b -----  
 DmelGr98a -----  
 AaegGr93a -----  
 TcasGr19 -----  
 DmelGr47a -----  
 DmelGr58c -----

TcasGr38 -----  
 TcasGr46 -----  
 TcasGr1 -----  
 TcasGr123 -----  
 TcasGr62 IFMHIVPTKLISFYKSTAILEIAFEVIFIVTVWMTGAVKHSKIAHFLNKMIRLDERFQSV 120  
 TcasGr25 -----  
 TcasGr59 -----  
 AgamGr2 -----  
 AaegGr66a -----  
 DmelGr66a -----  
 TcasGr11 -----  
 TcasGr55 -----  
 TcasGr21 -----  
 TcasGr56 -----  
 AaegGr -----  
 AaegGr28a -----  
 AgamGr33 -----  
 DmelGr28bB -----  
 DmelGr28bC -----  
 DmelGr28bD -----  
 DmelGr28bA -----  
 DmelGr28bE -----  
 AgamGr25 -----  
 AaegGr43a -----  
 DmelGr43a -----  
 AgamGr37b -----  
 AgamGr37d -----  
 AgamGr37a -----  
 AgamGr37c -----  
 AgamGr37e -----  
 AgamGr37f -----  
 AaegGr28c -----  
 AaegGr28b -----  
 AaegGr28e -----  
 TcasGr14 -----  
 TcasGr49 -----  
 AmelGr4 -----

AmelGr5 -----  
TcasGr16 -----  
TcasGr22 -----  
TcasGr17 -----  
TcasGr150 -----  
TcasGr32 -----  
TcasGr54 -----  
TcasGr37 -----  
TcasGr53 -----  
TcasGr5 -----  
TcasGr12 -----  
TcasGr13 -----  
TcasGr104 -----  
TcasGr45 -----  
TcasGr98 -----  
TcasGr52 -----  
TcasGr105 -----  
TcasGr4 -----  
TcasGr44 -----  
AgamGr9a -----  
AgamGr9c -----  
AgamGr9b -----  
AgamGr9d -----  
AgamGr9e -----  
AgamGr9f -----  
AgamGr9g -----  
AgamGr9i -----  
AgamGr9h -----  
AgamGr9j -----  
AgamGr9l -----  
AgamGr9k -----  
AgamGr9m -----  
AgamGr9n -----  
AgamGr10 -----  
AgamGr11 -----  
DmelGr23aA -----  
DmelGr23aB -----  
DmelGr39aA -----  
DmelGr39aB -----  
DmelGr39aC -----  
DmelGr39aD -----  
DmelGr98c -----  
DmelGr98d -----  
DmelGr98b -----  
AgamGr51 -----  
AgamGr52 -----  
DmelGr94a -----  
DmelGr97a -----  
DmelGr93b -----  
DmelGr93c -----  
DmelGr22d -----  
DmelGr22e -----  
DmelGr22a -----  
DmelGr22b -----  
DmelGr22c -----  
DmelGr22f -----  
DmelGr36a -----  
DmelGr36c -----  
DmelGr36b -----  
DmelGr59d -----  
DmelGr59a -----  
DmelGr59b -----  
AgamGr26 -----  
AgamGr27 -----  
AgamGr29 -----  
AgamGr31 -----  
AgamGr30 -----  
AgamGr32a -----  
TcasGr2 -----  
TcasGr9 -----



|            |                                                              |     |
|------------|--------------------------------------------------------------|-----|
| TcasGr7    | -----                                                        |     |
| TcasGr30   | -----                                                        |     |
| TcasGr29   | -----                                                        |     |
| AaegGr64f  | -----                                                        |     |
| AaegGr64a3 | -----                                                        |     |
| AgamGr14   | -----                                                        |     |
| AgamGr18   | -----                                                        |     |
| AaegGr64d  | -----                                                        |     |
| AgamGr17   | -----                                                        |     |
| AaegGr64c  | -----                                                        |     |
| DmelGr64c  | -----                                                        |     |
| DmelGr64d  | -----                                                        |     |
| AgamGr20   | -----                                                        |     |
| AaegGr61a  | -----                                                        |     |
| AgamGr21   | -----                                                        |     |
| AaegGr64a  | -----                                                        |     |
| DmelGr64a  | -----                                                        |     |
| DmelGr61a  | -----                                                        |     |
| AgamGr15   | -----                                                        |     |
| AaegGr1    | -----                                                        |     |
| DmelGr5a   | -----                                                        |     |
| DmelGr64f  | -----                                                        |     |
| DmelGr64e  | -----                                                        |     |
| AmelGr1    | -----                                                        |     |
| AmelGr2    | -----                                                        |     |
| AgamGr16   | -----                                                        |     |
| AaegGr64e  | -----                                                        |     |
| TCasGr6    | -----                                                        |     |
| TcasGr26   | -----                                                        |     |
| TcasGr33   | -----                                                        |     |
| AgamGr23   | -----                                                        |     |
| AaegGr21a  | -----                                                        |     |
| TcasGr10   | -----                                                        |     |
| TcasGr39   | -----                                                        |     |
| AgamGr22   | -----                                                        |     |
| AaegGr21b  | -----                                                        |     |
| DmelGr21a  | -----                                                        |     |
| AgamGr24   | -----                                                        |     |
| AaegGr63a  | -----                                                        |     |
| DmelGr63a  | -----                                                        |     |
| TcasGr3    | -----                                                        |     |
| DmelOr83b  | -----                                                        |     |
| AgamOr7    | -----                                                        |     |
| HvirOr2    | -----                                                        |     |
| TcasOr16   | NRTSIFPHVTPHQPIPHPLFHPLVHDFGDTVSPSTHVPLIPITSRVRRFHLTTYRCGCE  | 79  |
| TcasOr22   | NRTSIFPHVTPHQPIPHPLFHPLVHDFGDTVSPSTHVPLIPITSRVRRFHLTTYRCGCE  | 91  |
| AmelOr2    | -----                                                        |     |
| TcasGr31   | -----                                                        |     |
| TcasGr35   | -----                                                        |     |
| DmelGr59c  | -----                                                        |     |
| DmelGr92a  | -----                                                        |     |
| DmelGr28a  | -----                                                        |     |
| DmelGr64b  | -----                                                        |     |
| TcasGr71   | -----                                                        |     |
| AgamGr19   | -----                                                        |     |
| AaegGr64b  | -----                                                        |     |
| DmelGr93d  | -----                                                        |     |
| TcasGr34   | -----                                                        |     |
| TcasGr43   | -----                                                        |     |
| TcasGr47   | -----                                                        |     |
| AmelGr3    | -----                                                        |     |
| AgamGr32b  | -----                                                        |     |
| AgamGr50   | -----                                                        |     |
| TcasGr20   | -----                                                        |     |
| TcasGr79   | -----                                                        |     |
| TcasGr15   | -----                                                        |     |
| TcasGr60   | -----                                                        |     |
| AgamGr38   | -----                                                        |     |
| TcasGr51   | CLLMVVKILWVIYWLQDDALKSVYASLLCTEKIFLFAIYTNLSILTTVTIFKSAFWDVDK | 108 |
| DmelGr39b  | -----                                                        |     |

AgamGr28 -----  
 TcasGr61 -----  
 TcasGr50 -----  
 AgamGr12 -----  
 AgamGr36 -----  
 AgamGr48 -----  
 AgamGr49a -----  
 AgamGr49b -----  
 DmelGr2a -----  
 DmelGr32a -----  
 DmelGr68a -----  
 AmelGr7 -----  
 AmelGr8 -----  
 AmelGr9 -----  
 TcasGr57 -----  
 TcasGr41 -----  
 AgamGr34 -----  
 AgamGr35 -----  
 AgamGr39 -----  
 AgamGr40 -----  
 AaegGr28d -----  
 AgamGr42 -----  
 AgamGr41 -----  
 AgamGr43 -----  
 DmelGr33a -----  
 AgamGr44 -----  
 AgamGr13 -----  
 AgamGr45 -----  
 AgamGr46 -----  
 Dmelr93a -----  
 AmelGr6 -----  
 AmelGr10 -----  
 TcasGr28 -----  
 TcasGr40 -----  
 AgamGr3 -----  
 AgamGr4 -----  
 AgamGr6 -----  
 AgamGr7 -----  
 AgamGr47 -----  
 DmelGr8a -----  
 AgamGr5 -----  
 AgamGr8 -----  
 DmelGr9a -----  
 DmelGr59f -----  
 DmelGr77a -----  
 DmelGr85a -----  
 TcasGr27 -----  
 TcasGr48 -----  
 AgamGr1 -----  
 DmelGr10a -----  
 DmelGr59e -----  
 DmelGr10b -----  
 DmelGr89a -----  
 DmelGr57a -----  
 DmelGr47b -----  
 DmelGr58a -----  
 DmelGr58b -----  
 DmelGr98a -----  
 AaegGr93a -----  
 TcasGr19 -----  
 DmelGr47a -----  
 DmelGr58c -----

TcasGr38 -----  
 TcasGr46 -----  
 TcasGr1 -----  
 TcasGr123 -----  
 TcasGr62 -----  
 TcasGr25 -----

GLQIDTVREKRRIKIHFFLRSFLAIMLPLGILLISQDVIANVLLFIFIVVKSQVAFQTIE 180

TcasGr59 -----MWSENITDVLKHWVFLSKLFLLCPRSIDEKIKRQERHSFYKIYKYTYNIV 50  
AgamGr2 -----  
AaegGr66a -----MAAKVGSSLLESIKVLFYSSSILGIPYSLRDFYSRTVLRVSVVGNIWVLLSV 53  
DmelGr66a --MDNMQAEDAVQPLLQQFQQLFFISKIAGILPQDLEKFRSRNLEKSRNGMIYMLSTL 58  
TcasGr11 -----  
TcasGr55 -----  
TcasGr21 -----  
TcasGr56 -----  
AaegGr -----  
AaegGr28a -----  
AgamGr33 -----  
DmelGr28bB -----  
DmelGr28bC -----  
DmelGr28bD -----  
DmelGr28bA -----  
DmelGr28bE -----  
AgamGr25 -----  
AaegGr43a -----  
DmelGr43a -----  
AgamGr37b -----  
AgamGr37d -----  
AgamGr37a -----  
AgamGr37c -----  
AgamGr37e -----  
AgamGr37f -----  
AaegGr28c -----  
AaegGr28b -----  
AaegGr28e -----  
TcasGr14 -----  
TcasGr49 -----  
AmelGr4 -----  
AmelGr5 -----  
TcasGr16 -----  
TcasGr22 -----  
TcasGr17 -----  
TcasGr150 -----  
TcasGr32 -----  
TcasGr54 -----  
TcasGr37 -----  
TcasGr53 -----  
TcasGr5 -----  
TcasGr12 -----  
TcasGr13 -----  
TcasGr104 -----MRFLGESPNGIYLYHDGRVKLLEGRRVVDCDD 32  
TcasGr45 -----  
TcasGr98 -----  
TcasGr52 -----  
TcasGr105 -----  
TcasGr4 -----  
TcasGr44 -----  
AgamGr9a -----  
AgamGr9c -----  
AgamGr9b -----  
AgamGr9d -----  
AgamGr9e -----  
AgamGr9f -----  
AgamGr9g -----  
AgamGr9i -----  
AgamGr9h -----  
AgamGr9j -----  
AgamGr9l -----  
AgamGr9k -----  
AgamGr9m -----  
AgamGr9n -----  
AgamGr10 -----  
AgamGr11 -----  
DmelGr23aA -----  
DmelGr23aB -----  
DmelGr39aA -----  
DmelGr39aB -----

|            |                                                             |        |
|------------|-------------------------------------------------------------|--------|
| DmelGr39aC | -----                                                       |        |
| DmelGr39aD | -----                                                       |        |
| DmelGr98c  | -----                                                       |        |
| DmelGr98d  | -----                                                       |        |
| DmelGr98b  | -----                                                       |        |
| AgamGr51   | -----                                                       |        |
| AgamGr52   | -----                                                       |        |
| DmelGr94a  | -----                                                       |        |
| DmelGr97a  | -----                                                       |        |
| DmelGr93b  | -----                                                       |        |
| DmelGr93c  | -----                                                       |        |
| DmelGr22d  | -----                                                       |        |
| DmelGr22e  | -----                                                       |        |
| DmelGr22a  | -----                                                       |        |
| DmelGr22b  | -----                                                       |        |
| DmelGr22c  | -----                                                       |        |
| DmelGr22f  | -----                                                       |        |
| DmelGr36a  | -----                                                       |        |
| DmelGr36c  | -----                                                       |        |
| DmelGr36b  | -----                                                       |        |
| DmelGr59d  | -----                                                       |        |
| DmelGr59a  | -----                                                       |        |
| DmelGr59b  | -----                                                       |        |
| AgamGr26   | -----                                                       |        |
| AgamGr27   | -----                                                       |        |
| AgamGr29   | -----                                                       |        |
| AgamGr31   | -----                                                       |        |
| AgamGr30   | -----                                                       |        |
| AgamGr32a  | -----                                                       |        |
| TcasGr2    | -----                                                       |        |
| TcasGr9    | -----                                                       |        |
| TcasGr7    | -----MRVQPSNTPPEKSQST                                       | 17     |
| TcasGr30   | -----MRVQPSNTPPEKSQST                                       | 17     |
| TcasGr29   | -----MRVQPSNTPPEKSQST                                       | 17     |
| AaegGr64f  | -----                                                       |        |
| AaegGr64a3 | -----                                                       |        |
| AgamGr14   | -----M                                                      | 1      |
| AgamGr18   | -----                                                       |        |
| AaegGr64d  | -----MKL                                                    | 3      |
| AgamGr17   | -----                                                       |        |
| AaegGr64c  | -----                                                       |        |
| DmelGr64c  | -----                                                       |        |
| DmelGr64d  | -----                                                       |        |
| AgamGr20   | -----MIEVGFGRMPGP                                           | 14     |
| AaegGr61a  | -----MIDPLWRDRYIL                                           | 12     |
| AgamGr21   | -----MCVRSNPKENRAPVLESV                                     | 19     |
| AaegGr64a  | -----                                                       |        |
| DmelGr64a  | -----MKGPNLNFRTKPSKDNG                                      | 17     |
| DmelGr61a  | -----MSRTSDDIRKH                                            | 11     |
| AgamGr15   | -----MG---FAVSENHDTKPLIQPTWHTC-LK                           | 24     |
| AaegGr1    | -----MARKLLPQVLEPRQTGKIVRFNGELVPVQ                          | 29     |
| DmelGr5a   | -----MRQLKGRNRCNRAVR----                                    | HLK 18 |
| DmelGr64f  | -----MKILPKLERKLRRLKRVTRTSLFRKLDLVHER                       | 33     |
| DmelGr64e  | -----MARTTGDPAKRRRCMSRIKFWRRSRVGSEATLG                      | 33     |
| AmelGr1    | -----                                                       |        |
| AmelGr2    | -----MHSEDQIQLMMLKTKDGLGEIPKGKGRGNSLKI                      | 33     |
| AgamGr16   | -----MFPLLT---                                              | 6      |
| AaegGr64e  | -----MPGNFGRNDRHVILVRSK                                     | 18     |
| TCasGr6    | -----MEISD-----LAQLYGNE                                     | 13     |
| TcasGr26   | -----MEISD-----LAQLYGNE                                     | 13     |
| TcasGr33   | -----MEISD-----LAQLYGNE                                     | 13     |
| AgamGr23   | ---MRWNGCRYRYKTDQTPQRRVEKNFIRRHCPKTMVIKESFDDSLGYALLRRDMGTV  | 57     |
| AaegGr21a  | ---MTVIAIKVVEKAN---YRTVDYHVLR-----KKMVIKDFEFEDSLNYALLRGMGTT | 49     |
| TcasGr10   | -----MRNDHGSNT-----HLHPDDA                                  | 16     |
| TcasGr39   | -----MRNDHGSNT-----HLHPDDA                                  | 16     |
| AgamGr22   | -----MIHTQMED--AQYEIRHQVLNPNQ-----RQQLEDR                   | 29     |
| AaegGr21b  | -----MIHSQMED--SQYQIRQQILNPNQ-----RQQLEDN                   | 29     |
| DmelGr21a  | -----MSFWAVSRGLTPPSKVVPMLNPNQ-----RQFLEDE                   | 31     |
| AgamGr24   | -----                                                       |        |
| AaegGr63a  | -----MNLNQDPIQYINLNNNARTVFLDVKPIYNE-----EKR                 | 33     |

|           |                                                              |     |
|-----------|--------------------------------------------------------------|-----|
| DmelGr63a | ----MRPSGEKVVKGHGQGNHSGHSLSGMANYRKKKGDVFLNAKPLNSANAQAYLYGVR  | 56  |
| TcasGr3   | -----MYHQDQAVSILGEAIPKRRSVFLES-----GVN                       | 28  |
| DmelOr83b | -----MTTSMQPSKYTGLVADL                                       | 17  |
| AgamOr7   | -----MQVQPTKYVGLVADL                                         | 15  |
| HvirOr2   | -----MMTKVKAQGLVSDL                                          | 14  |
| TcasOr16  | RISNSR-----NTLSQYQILTNTFQMMKFVTGLVADL                        | 112 |
| TcasOr22  | RISNSRSVTNFQPLVRNTLSQYQILTNTFQPLVRNTLSQYQILTNTFQMMKFVTGLVADL | 151 |
| AmelOr2   | -----MMKFKQQLIADL                                            | 13  |
| TcasGr31  | -----                                                        |     |
| TcasGr35  | -----                                                        |     |
| DmelGr59c | -----                                                        |     |
| DmelGr92a | -----                                                        |     |
| DmelGr28a | -----                                                        |     |
| DmelGr64b | -----                                                        |     |
| TcasGr71  | -----                                                        |     |
| AgamGr19  | -----                                                        |     |
| AaegGr64b | -----                                                        |     |
| DmelGr93d | -----                                                        |     |
| TcasGr34  | -----                                                        |     |
| TcasGr43  | -----                                                        |     |
| TcasGr47  | -----                                                        |     |
| AmelGr3   | -----                                                        |     |
| AgamGr32b | -----                                                        |     |
| AgamGr50  | -----                                                        |     |
| TcasGr20  | -----                                                        |     |
| TcasGr79  | -----                                                        |     |
| TcasGr15  | -----                                                        |     |
| TcasGr60  | -----                                                        |     |
| AgamGr38  | -----                                                        |     |
| TcasGr51  | WRTLFTNLQYIDINLQNKGKKESKLMKNFYFWFVLKQVMFLCYSTYGIQVFGTMQRTSFF | 168 |
| DmelGr39b | -----                                                        |     |
| AgamGr28  | -----                                                        |     |
| TcasGr61  | -----MTKSTVYDTSWLILLSLLLGLYPSYLQTVGKCQRLKTDKN                | 41  |
| TcasGr50  | -----                                                        |     |
| AgamGr12  | -----                                                        |     |
| AgamGr36  | -----                                                        |     |
| AgamGr48  | -----                                                        |     |
| AgamGr49a | -----                                                        |     |
| AgamGr49b | -----                                                        |     |
| DmelGr2a  | -----                                                        |     |
| DmelGr32a | -----MSENTWVI                                                | 8   |
| DmelGr68a | -----                                                        |     |
| AmelGr7   | -----                                                        |     |
| AmelGr8   | -----                                                        |     |
| AmelGr9   | -----                                                        |     |
| TcasGr57  | -----                                                        |     |
| TcasGr41  | -----                                                        |     |
| AgamGr34  | -----                                                        |     |
| AgamGr35  | -----                                                        |     |
| AgamGr39  | -----                                                        |     |
| AgamGr40  | -----                                                        |     |
| AaegGr28d | -----                                                        |     |
| AgamGr42  | -----                                                        |     |
| AgamGr41  | -----                                                        |     |
| AgamGr43  | -----                                                        |     |
| DmelGr33a | -----                                                        |     |
| AgamGr44  | -----                                                        |     |
| AgamGr13  | -----                                                        |     |
| AgamGr45  | -----                                                        |     |
| AgamGr46  | -----                                                        |     |
| Dmelr93a  | -----                                                        |     |
| AmelGr6   | -----MMKSIRKELA                                              | 10  |
| AmelGr10  | -----                                                        |     |
| TcasGr28  | -----                                                        |     |
| TcasGr40  | -----                                                        |     |
| AgamGr3   | -----                                                        |     |
| AgamGr4   | -----                                                        |     |
| AgamGr6   | -----                                                        |     |
| AgamGr7   | -----                                                        |     |
| AgamGr47  | -----                                                        |     |

DmelGr8a -----  
AgamGr5 -----  
AgamGr8 -----  
DmelGr9a -----  
DmelGr59f -----  
DmelGr77a -----  
DmelGr85a -----  
TcasGr27 -----  
TcasGr48 -----  
AgamGr1 -----  
DmelGr10a -----  
DmelGr59e -----  
DmelGr10b -----  
DmelGr89a -----  
DmelGr57a -----  
DmelGr47b -----  
DmelGr58a -----  
DmelGr58b -----  
DmelGr98a -----  
AaegGr93a -----  
TcasGr19 -----  
DmelGr47a -----  
DmelGr58c -----  
  
TcasGr38 -----MNNKLNMLVVKSMQLRIKMEEKLVEKFLNSLQIYL 36  
TcasGr46 -----MEEKLVVEKFLNSLQIYL 18  
TcasGr1 -----MQHEVVKKFLHNSVRIVF 17  
TcasGr123 -----MSDFQKLYQKFVNSIRILL 19  
TcasGr62 FVSIIRNRFVILNRYIEESISKYKHAELVMPLCKSCDLHHRLSKLIKQLNATYGLILLM 240  
TcasGr25 -----  
TcasGr59 AVSLTAYMVYITTNLR----ITQKLSIVTQLADLIFSASANASGVATVFFCLFYQNKLIE 106  
AgamGr2 -----MEPFMMAVDMVAGMINQKRLAQ 22  
AaegGr66a VSYSVSYHMVTDAYVG---VGGGQGTLTNAIGIFIIYMEPLMMCIDMLAAMLNQKRLIE 110  
DmelGr66a ILYVVLYNLIYSFGEEDRSLKASQSTLTFVIGLFLTYIIGLIMMVSQDLTALRNQGRIGE 118  
TcasGr11 -----MIKFSKVKSYFTTHHDTLHNIYTSMKPVYAI CKLIG 36  
TcasGr55 -----MIKFSKVKSYFTTHHDTLHNIYTSMKPVYAI CKLIG 36  
TcasGr21 -----MLPKQFLKLFKDPDVYTAIHPLFYVCTFFG 31  
TcasGr56 -----MLPKQFLKLFKDPDVYTAIHPLFYVCTFFG 31  
AaegGr -----MASSHWRDCINPKNFYAAQAPVLKATFIGG 31  
AaegGr28a -----  
AgamGr33 -----MRKCLRTFLNPKDFYAAQRPVLRVSVFLVG 29  
DmelGr28bB -----MSALRRVRKYFISSQVYEALRPLFFLTFLYG 31  
DmelGr28bC ---MDIEMAKEPVNPTDTPDIEVTPGLCQPLRRRFRFVTAKQLYECLRPVHVYTIHG 56  
DmelGr28bD -----MSFYFCEIFKPRDAFGAEQTLTTYLLG 29  
DmelGr28bA -----MIRCGLDIFRGCGRFRYWLSARDCYDSISLMVAIAFALG 40  
DmelGr28bE -----MWLLRRSVGKSGNRPHDVYTCYRLTIFMALCLG 33  
AgamGr25 -----MEISESTKVVFFVSRIFG 18  
AaegGr43a -----MEISESTKVVFFVSRIFG 18  
DmelGr43a -----MEISQPSIGIFYISKVLA 18  
AgamGr37b -----MMDSCLLVQ-----NVHDTFRPFYLLKVTG 26  
AgamGr37d -----MR-WFSVT-----SVYETVQPFMFLGCVG 24  
AgamGr37a -----MYRRSVAVVMLLNESLNVSMEVLYWILRFLG 33  
AgamGr37c -----MSLFG-----DALVAYETFSVLLKYL 23  
AgamGr37e -----MLTSNE-----DALKAFECFTLVVKCLG 23  
AgamGr37f -----MVYKVLQKFN-----TSSSIEAFQPFLLLKCLG 29  
AaegGr28c -----MSSAK-----VTVFETYSSVIVLLKCVG 23  
AaegGr28b -----MALQWLKGHRLRALSSSDSIYDVVYLNLYLLSKIFG 34  
AaegGr28e -----MALQWLKGHRLRALSSSDSIYDVVYLNLYLLSKIFG 34  
TcasGr14 -----  
TcasGr49 -----MCQIKNLLLLSSTQPNYLILSNKNNTYLVLNKYLL 37  
AmelGr4 -----MVDKLYWSRNMHLAIMLFLFFF 22  
AmelGr5 -----MVDKSYWSRNMDRLLTLLFFFF 22  
TcasGr16 -----MPQVKLHKHYVPIILLSKILG 21  
TcasGr22 -----  
TcasGr17 -----MNTFKIFRPKILAEIFG 18  
TcasGr150 -----MNTFKIFRPKILAEIFG 18  
TcasGr32 -----MSFKLLRLVLKVGHFFA 17  
TcasGr54 -----MSFKLLRLVLKVGHFFA 17  
TcasGr37 -----MLKWWLKVGNVLA 13

TcasGr53 -----MLKWVLKVGNVLA 13  
TcasGr5 -----MTIQLLSLICKFGGWMG 17  
TcasGr12 -----MSNLKLLKFLKLGQLL 18  
TcasGr13 VSSVSQSEAGDEDRFSFTSSMVQSLDGNSSDLENSSEENCVSMNLKLLKFLKLGQLL 92  
TcasGr104 -----MCYFNYSKKDIRSLSFYKICNIFG 25  
TcasGr45 -----MCYFNYSKKDIRSLSFYKICNIFG 25  
TcasGr98 -----MSYRLSRNDRFLKVMYKLSHFLS 24  
TcasGr52 -----  
TcasGr105 -----MYFSRRDIRFLRPIFAVCRLFA 22  
TcasGr4 -----MVRPELDLNSLKCI TKVLTILG 22  
TcasGr44 -----MTRAMVRPELDLNSLKCI TKVLTILG 26  
AgamGr9a -----MHVLSNLRMLRCLQFVG 18  
AgamGr9c -----MFENIHALRSLQWVG 16  
AgamGr9b MINRVERGWEMVECITLVSLSENGAHVRWRCKSFGKVVYITMHVFDNIHVLLRSLQFLG 60  
AgamGr9d -----MDVFDNIRGLRCLRLLG 18  
AgamGr9e -----MKWVQTILNLSSTVG 15  
AgamGr9f -----MECLQIMFQSLSALG 15  
AgamGr9g -----MWCLRHLQCMKELG 15  
AgamGr9i -----MRCIRVQLAYMGRGL 15  
AgamGr9h -----MAASSFAELIRPMINTACTLG 21  
AgamGr9j -MLMQPVDIRPFSISLINLLPSISRIGPCVWLPQFCLLFNRMSNLLKRYRLLAVASIGY 59  
AgamGr9k -MLEH---LFWYTFLSIILWYSFS---FFWK---CTTVDKMSSLVKRYQRLFAVATVMY 49  
AgamGr9l -----MSWLKSPLYGQYQNDIRIVTFYHQDTVDIMSMYIRQNHFTLRIVTAIY 49  
AgamGr9m -----MWFISFYHEAYT---TFVIRGKAVVKSSTMSACARLNRYTFKIMSSVY 45  
AgamGr9n -----MSSLYRQHSRIFQISRLLY 19  
AgamGr10 -----MSSLYRQHSRIFQISRLLY 19  
AgamGr11 -----MSSYYRRHARIFQAAALFY 19  
DmelGr23aA -----MKTLECLTRRFLEVIFSVL 19  
DmelGr23aB -----MFPPTRVQASSRVVLKIFHFI 21  
DmelGr39aA -----MGTRNRKLLFFLHYQRYLG 19  
DmelGr39aB -----MDFQPGELCAYYRLCYRLG 19  
DmelGr39aC -----MKRNAFEELRVQLRTLKWL 20  
DmelGr39aD -----MSKVCRDLRIYLRLLHIMG 19  
DmelGr98c -----MEMEAKRSRLLTTARPYLQVLSLFG 25  
DmelGr98d -----MEANRSRLLAAARPYIQIYSIFG 23  
DmelGr98b -----MVAQKSRLARAFPYLDIFSVA 23  
AgamGr51 -----MCVCVCVCVAVSPVRWSVRRFSCCTMQVPRWLVLSVVLKFLFA 46  
AgamGr52 -----MDYTDKSCVPSRDATLSVAMNVSKWSERLERCVSFLLA 39  
DmelGr94a -----MDFTSDYAHRRMVKFLTIILIGFMTVFG 28  
DmelGr97a -----MRFLRRQTRRLRSIWQRSLPVRFRGKLTQLVTICLYATVFLNLYG 48  
DmelGr93b -----MVYGTMSGLLVMPRIILRCLNVSRISAILLRSCFLYGTFFG 41  
DmelGr93c -----MIERLKKVSLPALSAFILFCSCHYGRILG 29  
DmelGr22d -----MFRPR-CGLRQK-FVYVILKSILYSSWLLG 28  
DmelGr22e -----MFRPSGSGYRQK-WTGLTLKGALYGSWILG 29  
DmelGr22a -----MSQPKRIHRICKGLARFTIRATLYGSWVLG 30  
DmelGr22b -----MFGSS-REIRPY-LARQMLKTTLYGSWLLG 28  
DmelGr22c -----MFASR-SDLQSR-LCWIIKATLYSSWFLG 28  
DmelGr22f -----MKMFQPR-RGFSCH-LAWFMLQTTLYASWLLG 30  
DmelGr36a -----MFDWVGLLLKVLVYYGQIIG 20  
DmelGr36c -----MDLESFLLGAVYYGLFIG 19  
DmelGr36b -----MVDWVLLKAVHIYCYLIG 20  
DmelGr59d -----MADLLKCLRIAYAYGRLTG 20  
DmelGr59a -----MKRIGQAYNVYAVFIG 16  
DmelGr59b -----MVYWMIKLYFRYSLAIG 17  
AgamGr26 -----MVLELLSNRHLFRNEFLHSAHRLRVCQVFG 31  
AgamGr27 -----MAFATAAIQSFLQLNVKRSYRLLTVGQVFG 31  
AgamGr29 -----MSRIQTENRAHFRAILMDTFQPAIFLSQWSC 31  
AgamGr31 -----MHRLTTEKCAFRNLLVDTCLRAIRLSQWCC 31  
AgamGr30 -----MCLVELDAAFYQYLLNQFRPLLNVAQCFCG 30  
AgamGr32a -----MDPIKLDTTFYHKLVLVKKFNLLNIAQLAG 30  
TcasGr2 MEKSTKIFPVPGD-----KNLHKSYSKMLILAQIFG 31  
TcasGr9 MEKSTKIFPVPGD-----KNLHKSYSKMLILAQIFG 31  
TcasGr7 ADTANLINKSLGK-----HNLQKSFQKVVILAQIFG 48  
TcasGr30 ADTANLINKSLGK-----HNLQKSFQKVVILAQIFG 48  
TcasGr29 ADTANLINKSLGK-----HNLQKSFQKVVILAQIFG 48  
AaegGr64f -----  
AaegGr64a3 -----  
AgamGr14 LNMTPEVTPVKRFPVSRPSTPSTALAEETPPADGAAERECSTHEAVALVIFMGQLFS 61  
AgamGr18 -----MKIASSLLLFYFFLP-----ITFNIFRAKVVLLGQCIT 33  
AaegGr64d LTLTSRRAATAVAIGKESFFPNFHLPRWSKWI GRLK GKSTFDG SFHQAVAPVLFV GQCFT 63

AgamGr17 -----MESP-----AIDDFHRAVRPFLLIISQLFS 24  
 AaegGr64c -----MQAPNQHCLAQLRKWHRHQFSPDNAVMDSNSKIDDFWGAVRPIIFVAQLFT 51  
 DmelGr64c -----MQQSGQKQTR----NTLQHAIGPVLVIAQFFG 28  
 DmelGr64d -----MLRSHLSVHGLQMERSVQENTLHYTIGHVLI IARIFG 37  
 AgamGr20 VRSSNATRPTRSRWHWLRKRGNVTFVR-----PAAEIDDRKERFYLAIAS 59  
 AaegGr61a WKNSKILQPDEEPVNEENVSEYDFH-----IAIAPVLR----FSQLFG 53  
 AgamGr21 RTLATSMCSSVTTTAMKLAAGYTLRQRVRQKLCPKIVDDDRDTFLRGIRPVVILGQMGF 79  
 AaegGr64a -----  
 DmelGr64a VKQVESLARPETPPPKFVEDSNLEFNVLASEKLPN---YTNLDFHRAVFPFMFLAQCV 74  
 DmelGr61a LKVRQRKQRAILAMRWRC AQGLEF-----EQLDTFYGAIRPYLCVAQFFG 57  
 AgamGr15 RWC-ASWLHWPR-----VQRR-----ASREDWLFNGTFHEASRGVLMMAQLFS 66  
 AaegGr1 SKS-RAFLKHFK-----YPKR-----ATRENWIHDGSHDAVSGLLITAQLFS 71  
 DmelGr5a VQG-KMWLKNLKSGLQIR-ESQVR-----GTRKNFLHDGSHFEAVAPVLAQAQFC 68  
 DmelGr64f ARK-KAFQESCETYKNQIENEYEIRNSLPKLSRSDKEAFLSDGSHQAVGRVLLVAEFFA 92  
 DmelGr64e I IKYRVVEKDTKRFKLSLIKAWLLR-----IRQEDYKYSGSFQEAIKPVLI IAQIFA 85  
 AmelGr1 -----MRPIIMLAQFFS 12  
 AmelGr2 WSSVMYHKDDNIEDISANQENDLSTKRPRAEARNYFRNSEALENFHCAIGPVLKAAQIFG 93  
 AgamGr16 ----EDFYHPPNR-----PRFINGG--GYFCRSIRPVLIVGQMGF 40  
 AaegGr64e VGDSSSFEREFYR-----QRQVNLQEGSYLAVFRPVIILGQVFA 58  
 TCasGr6 LHIKQISKWLRG-----SARAQEIQKRSELDKDGHVIDEHDQFFRDHKL LVLFRVLG 67  
 TcasGr26 LHIKQISKWLRG-----SARAQEIQKRSELDKDGHVIDEHDQFFRDHKL LVLFRVLG 67  
 TcasGr33 LHIKQISKWLRG-----SARAQEIQKRSELDKDGHVIDEHDQFFRDHKL LVLFRVLG 67  
 AgamGr23 WDTAKDERMVNGTMDPELIQRAKERAVRAQLNSADGDTCEHDQFYRDHKL LVLFRGLA 117  
 AaegGr21a WDINKDERMMNGTLDPELIQRAKERAIRAQLNSADGDTCELDHDFYRDHKL LVLFRALA 109  
 TcasGr10 IRRAKIVKVAASPT-----SANPDE-----EPDPELLDRYDNFYQTTKSL LVLFRQIMG 64  
 TcasGr39 IRRAKIVKVAASPT-----SANPDE-----EPDPELLDRYDNFYQTTKSL LVLFRQIMG 64  
 AgamGr22 RRIKEQLHQLEQDN-----ESPTHMYRRKLIASDVNLLDQHDSFYHTTKSL LVLFRQIMG 84  
 AaegGr21b RRIKEQMQLQRDD-----ASPSHMYIRKLEFQADVNLLDKHDSFYHTTKSL LVLFRQIMG 84  
 DmelGr21a VRYREKLLKLMARG-----DAMEEVYVRKQETVDDPLELDKHDSFYQTTKSL LVLFRQIMG 85  
 AgamGr24 -----MVFESSKPIYLVLVRAIG 17  
 AaegGr63a KVSNGFNRRIG-----FPPISSRRVFGLESEFN--TRSDIVYGTTPKIY NVLRLMLG 82  
 DmelGr63a KYSIGLAERLDADY-----EAPPLDRKSSDSTASNNPEFKPSVYFRNIDP INWFLRIIG 111  
 TcasGr3 SADSFKASKVG-----PAPPIKFKINKSSTDKFGN-----GAIYEVLPKIYALMRIVG 75  
 DmelOr83b MPNIRAMKYSGLFMHNFTGG----SAFMKKVYSSVHLVFLMQFTF ILVNMALNAEVE 73  
 AgamOr7 MPNIRLQMAGHFLFRYVTG----PILIRKVVSWWTLAMVLIQFFAILGNLATNADDVNE 71  
 HvirOr2 MPNIKLMQMAGHFLFNHSEENAGMSNLLRKIYASTHAILIFIHYACMGINMAKYSDEVNE 74  
 TcasOr16 MPNIRLIQASGHFMLNYHADNSGALHTLRLGYCCMHLVFLVQYGCNFVNLVLERGDVND 172  
 TcasOr22 MPNIRLIQASGHFMLNYHADNSGALHTLRLGYCCMHLVFLVQYGCNFVNLVLERGDVND 211  
 AmelOr2 MPNINLMKATGHFMFNYTDS--TKHIHKI-YCIVHLVLI LMQFGFCGINLMMESD VDD 71  
 TcasGr31 -----  
 TcasGr35 -----  
 DmelGr59c -----MVDLVKTIILLIAYWYG 16  
 DmelGr92a -----MFEFLHQMSAPKLSTSI LRYIFRYAQFIG 29  
 DmelGr28a -----MAFKLWERFSQADNVFQALRPLTFISLLG 29  
 DmelGr64b -----MPQGETFHRAVSNVLFISQIYG 22  
 TcasGr71 -----MTDHNLLRLIVTIGEFFA 18  
 AgamGr19 -----MNFHNTIRPILVIFLLFG 18  
 AaegGr64b -----MATAEMRRIARTGINFS---N 18  
 DmelGr93d -----MKATKYSVGILRFMSFYARFLS 22  
 TcasGr34 -----MSSQLLKLTHDALKILG 17  
 TcasGr43 -----MDFQLLQIMFTIGKFFA 17  
 TcasGr47 -----MDLEVLEIYFTVANKFS 17  
 AmelGr3 -----MEVKRVEEKRKILFNNELCQAIFPIIYLGKFCG 33  
 AgamGr32b -----MAWNDTEIDRLRHQLRQNI SPTVRLSQCLS 30  
 AgamGr50 -----MARKGVLTIGERFCI WLLMVG 22  
 TcasGr20 -----MTPHALISSDFHDVIKPLINLTKIFG 26  
 TcasGr79 -----MNSIPIETIFKFGKYTL 17  
 TcasGr15 -----MDIKSIKTCFYVAKFFA 17  
 TcasGr60 -----MILVLLVIVNLGLNG 15  
 AgamGr38 -----MKAKSGNRELFESLLRFPKR DVPDCVPLHY 30  
 TcasGr51 KTFNLNSCLMDVYEFLLISLINILIRSFKSRKDLNQLKLETA CEQSKSVEELMN IANYR 228  
 DmelGr39b -----MLYSFHPYLYKIFALLG 16  
 AgamGr28 -----MFEGRDVQHLRKLQLYQSFQYLRCAQLLS 30  
 TcasGr61 CTIVIIIFHLILFAVLLYFASLEKNPLFDGQLYSFNTFAKLLIFVVSLSGNSAVFIMLIIS 101  
 TcasGr50 -----MSLYSSINSLVLI SKIFA 18  
 AgamGr12 -----MARLCAKLRVLFVSNVLY 19  
 AgamGr36 -----MGCSYKNPRHVYDVL RPLLAFFSKYFG 26  
 AgamGr48 -----MMVRYGLRALYFHSILG 18  
 AgamGr49a -----MQNSSRMMSFINYPRSI FNQLNHSRTQCD SAA 32  
 AgamGr49b -----MLYGYLTLLVLRHLHFHTAQ CIG 22



|           |                                                              |     |
|-----------|--------------------------------------------------------------|-----|
| DmelGr2a  | -----MEFGMDTLRALEPLHRACQVCN                                  | 22  |
| DmelGr32a | EMPTQKTRSHPYPRRISPYRPPVLRDAFSRDAPPMPARNHDHPVFEDIRTIILSVLKASG | 68  |
| DmelGr68a | -----MKIYQDIYPIISKPSQIFA                                     | 18  |
| AmelGr7   | -----MYEPKTLKETIKPLMVVNFVFG                                  | 22  |
| AmelGr8   | -----MIDRLKCNKRVKNCRQSSALCFGNYS                              | 29  |
| AmelGr9   | -----MWLEKLLKHKIWKIFKATDFNSLMFPCFFICGIIIG                    | 35  |
| TcasGr57  | -----MKEVPGWLTTPPHSLG                                        | 15  |
| TcasGr41  | -----MIEVGKTRVKRASNLFRFQFCA                                  | 24  |
| AgamGr34  | -----MKNKVSLSIIISIVEMNVKFYRLLG                               | 25  |
| AgamGr35  | -----MSKWINKRKVSIILNLAPPSKPGPALQATPVGEQEFELFHFAFKCFRLFA      | 50  |
| AgamGr39  | -----MSRLFEEKSFVQTLRILYIATLFG                                | 25  |
| AgamGr40  | -----MKWFSVDSVYDSVRPVYRAGKLIG                                | 24  |
| AaegGr28d | -----MRWFKVHNYFESLRPLYLAIKLLH                                | 24  |
| AgamGr42  | -----MSTRKLYWFNIGSFFETMKPNIRVLKLF                            | 29  |
| AgamGr41  | -----MDVFGLENSRELVVSWWPKINDVVHAVSPIWNTSRAFG                  | 38  |
| AgamGr43  | -----MCFVLFILPYSMLMLIAVFSFIQIIIG                             | 26  |
| DmelGr33a | -----MIQIMNWFMSVIGLIPLNRRQSETNFILDYAMMCIVPIFYVACYLLINLSHIIIG | 54  |
| AgamGr44  | -----MLNDKVVNGLLLFSTTIALLG                                   | 22  |
| AgamGr13  | -----MLLLFSLYFNLLLSYAAG                                      | 18  |
| AgamGr45  | -----MPPRKVFAWSISLQNAIIPLYIISKVGCINAFYTLPLPHFLDITYAG         | 46  |
| AgamGr46  | -----MNGINTGKPPSAASPPDYSRQQFLRCFRPLHLLSSTFA                  | 38  |
| Dmelr93a  | -----MFSSSSAMTGKRAESWSRLLLLWLRYCARG                          | 30  |
| AmelGr6   | RYPAKRVLPLTKPRLKPFVDVETTFAEVTLARKEHTRKYHGPDSSLYSIYPVVCMVKVFG | 70  |
| AmelGr10  | -----MVLVGDNLIFNAGLILG                                       | 18  |
| TcasGr28  | -----MRLIRKMKSDLVLTIEASDAVL                                  | 22  |
| TcasGr40  | -----MVFAELWKKIRNRGTPPKFELPTTHNCLKVVLLLSQIVG                 | 39  |
| AgamGr3   | -----MASVRKFLILVTFGAFSWLLLLLQQLFG                            | 27  |
| AgamGr4   | -----MQFSSHQSSDVHFIVSRERSSPSTCTMNLVLPPLLPNGQQLLSVAFGIFKCFG   | 52  |
| AgamGr6   | -----MFNSFSKSSLEFILTETQCTTMEQFSASSMSRHHAPYDRRFGSIIYPLFQLL    | 52  |
| AgamGr7   | -----MLVTLIFQLCALQTYASTDAPLGSLLALLWCINCYCILYVG               | 40  |
| AgamGr47  | -----MSVMESNEKFYHPQKTKTGVVIVTINVVQYQKKWD                     | 35  |
| DmelGr8a  | -----MSGHLGRVLQFHLRLYQVLG                                    | 20  |
| AgamGr5   | -----MSRINEIMKIAQPIRDNYFARSPWSKGRFRVGTYLPNLDRARLVFSVRD       | 51  |
| AgamGr8   | -----MECFSKVIVLYQILA                                         | 15  |
| DmelGr9a  | -----MSLWLEHFLTGYFQLCG                                       | 17  |
| DmelGr59f | -----MRSSATKGAKLKNSPRERLSSFPNQAERYKELYRTLFWLL                | 41  |
| DmelGr77a | -----MPLPLGDPALAVSPQLGYIRITAMPRWLQPLGMSALGILYSLTRVFG         | 48  |
| DmelGr85a | -----MYSLIEAQLLGGKLVNRVMAASLRRIIQRSLYGFCALNG                 | 38  |
| TcasGr27  | -----MSHSNPLEAFKLNFTFLKALT                                   | 21  |
| TcasGr48  | -----MHTLQHFTIDTRSTHSMKNFKYLKVLVTFFAHFIC                     | 34  |
| AgamGr1   | -----MIGLKKHRAFLERLWTLRAQHVFG                                | 25  |
| DmelGr10a | -----MTSPDERKSFWERHEFKFYRYGHVYALIYG                          | 30  |
| DmelGr59e | -----MDSSYWENLLTINRFLG                                       | 18  |
| DmelGr10b | -----MRVGKLCRLALRFWMGLIILVLG                                 | 22  |
| DmelGr89a | -----MLRFPHVCGLCLLLKYWQILA                                   | 21  |
| DmelGr57a | -----MAVLYFFREPETVFDCAAFICILQFLMG                            | 28  |
| DmelGr47b | -----MQRDDGFVYCYGNLYSLLLLYWG                                 | 22  |
| DmelGr58a | -----MLLKFMYYIGIGCG                                          | 14  |
| DmelGr58b | -----MLHPKLGVRMNVVYHSMVFA                                    | 21  |
| DmelGr98a | -----MEQMSGELHAASLLYMRRLMKCLG                                | 24  |
| AaegGr93a | -----MVQSLQILWQFNLAVLHLMESLFG                                | 24  |
| TcasGr19  | -----MTSKARTFTIKCPVKKRCKTVSNVS                               | 25  |
| DmelGr47a | -----MAFTSSQLCSLLTKFTA                                       | 17  |
| DmelGr58c | -----MNQYFLLHTYFQVSRILG                                      | 18  |
|           |                                                              |     |
| TcasGr38  | QHN-----QIF                                                  | 42  |
| TcasGr46  | QHN-----QIF                                                  | 24  |
| TcasGr1   | VQS-----EIF                                                  | 23  |
| TcasGr123 | FQS-----RIF                                                  | 25  |
| TcasGr62  | FTSHFIFIVVSIFYMSAYLISNPIMWDRVMLLTFWSAFFIVNVLYICNQCYNTVEESRIF | 300 |
| TcasGr25  | -----                                                        |     |
| TcasGr59  | VISK-----LHKLDN                                              | 116 |
| AgamGr2   | CFDR-----LARLDN                                              | 32  |
| AaegGr66a | CVER-----LDKVDL                                              | 120 |
| DmelGr66a | LYER-----IRLVDE                                              | 128 |
| TcasGr11  | LNTLR-----IGR                                                | 44  |
| TcasGr55  | LNTLR-----IGR                                                | 44  |
| TcasGr21  | LAPYS-----LVR                                                | 39  |
| TcasGr56  | LAPYS-----LVR                                                | 39  |

|            |                 |        |    |
|------------|-----------------|--------|----|
| AaegGr     | LTPFT-----      | VVN    | 39 |
| AaegGr28a  | -----           |        |    |
| AgamGr33   | MTPFT-----      | VVK    | 37 |
| Dme1Gr28bB | LTPFH-----      | VVR    | 39 |
| Dme1Gr28bC | LTSFY-----      | ISCD   | 65 |
| Dme1Gr28bD | LTPFR-----      | LRG    | 37 |
| Dme1Gr28bA | ITPFL-----      | VRR    | 48 |
| Dme1Gr28bE | IVPYY-----      | VSI    | 41 |
| AgamGr25   | LAPYV-----      | VKRT   | 27 |
| AaegGr43a  | LAPYV-----      | VKRT   | 27 |
| Dme1Gr43a  | LAPYA-----      | TVRN   | 27 |
| AgamGr37b  | LAPF-----       | RLN    | 33 |
| AgamGr37d  | LAPFG-----      | YRLG   | 33 |
| AgamGr37a  | YAPFR-----      | LQLD   | 42 |
| AgamGr37c  | VNPPI-----      | SCDR   | 32 |
| AgamGr37e  | LYPPV-----      | TCSR   | 32 |
| AgamGr37f  | LTPFF-----      | SNAS   | 38 |
| AaegGr28c  | LHPPL-----      | TNPK   | 32 |
| AaegGr28b  | MFIYT-----      | VTEN   | 43 |
| AaegGr28e  | MFIYT-----      | VTDN   | 43 |
| TcasGr14   | -----           | MPL    | 3  |
| TcasGr49   | VKHSK-----      | PKMPL  | 47 |
| AmelGr4    | KFFGL-----      | ATFSL  | 32 |
| AmelGr5    | KFAGL-----      | ATFSL  | 32 |
| TcasGr16   | IAPIS-----      | YKNSN  | 31 |
| TcasGr22   | -----           |        |    |
| TcasGr17   | LSPMT-----      | QKLTTL | 28 |
| TcasGr150  | LSPMT-----      | QKLTTL | 28 |
| TcasGr32   | ITPGF-----      |        | 22 |
| TcasGr54   | ITPGF-----      |        | 22 |
| TcasGr37   | MTP-----        |        | 16 |
| TcasGr53   | MTP-----        |        | 16 |
| TcasGr5    | LTP-V-----      |        | 21 |
| TcasGr12   | LAP-----        |        | 21 |
| TcasGr13   | LAP-----        |        | 95 |
| TcasGr104  | IVPPY-----      |        | 30 |
| TcasGr45   | IVPPY-----      |        | 30 |
| TcasGr98   | ITPNY-----      |        | 29 |
| TcasGr52   | MQDSF-----      |        | 5  |
| TcasGr105  | LVPYY-----      |        | 27 |
| TcasGr4    | LLSCSFP-----    |        | 29 |
| TcasGr44   | LLSCSFP-----    |        | 33 |
| AgamGr9a   | QLSIQN-----     | HA     | 26 |
| AgamGr9c   | QLSIQN-----     | HA     | 24 |
| AgamGr9b   | LISVQKCQCS----- | DHR    | 73 |
| AgamGr9d   | LFSIHQ-----     | YR     | 26 |
| AgamGr9e   | VALARY-----     | D      | 22 |
| AgamGr9f   | MTLVRY-----     | D      | 22 |
| AgamGr9g   | LTMVKY-----     | D      | 22 |
| AgamGr9i   | LTMVKY-----     | D      | 22 |
| AgamGr9h   | ISYVKH-----     | CP     | 29 |
| AgamGr9j   | LIPCSY-----     | N      | 66 |
| AgamGr9l   | ILPCRY-----     | N      | 56 |
| AgamGr9k   | FLPVSY-----     | N      | 56 |
| AgamGr9m   | YLPVAY-----     | D      | 52 |
| AgamGr9n   | FTPCCSY-----    | N      | 26 |
| AgamGr10   | FTPCCSY-----    | N      | 26 |
| AgamGr11   | LVPCSY-----     | N      | 26 |
| Dme1Gr23aA | ALVPLP-----     | PIS    | 28 |
| Dme1Gr23aB | LVAFSL-----     | RSR    | 30 |
| Dme1Gr39aA | LTNLDF-----     | SKS    | 28 |
| Dme1Gr39aB | IFCIDY-----     | NPT    | 28 |
| Dme1Gr39aC | VLRFTI-----     | DFN    | 29 |
| Dme1Gr39aD | MMCWHF-----     | DSD    | 28 |
| Dme1Gr98c  | LTPPAE-----     | FFT    | 34 |
| Dme1Gr98d  | LTPPIQ-----     | FFT    | 32 |
| Dme1Gr98b  | LTPPPQ-----     | SFG    | 32 |
| AgamGr51   | I--LPLSFD-----  | R      | 54 |
| AgamGr52   | CGTFPLRFD-----  | A      | 49 |
| Dme1Gr94a  | LLAN-----       |        | 32 |

|            |                     |     |
|------------|---------------------|-----|
| DmelGr97a  | VYLG-----           | 52  |
| DmelGr93b  | VITFRIERK-----D     | 51  |
| DmelGr93c  | VICFDIGQR-----T     | 39  |
| DmelGr22d  | IFPFKYEP-----       | 36  |
| DmelGr22e  | VFPFAYDS-----       | 37  |
| DmelGr22a  | LFPFTFDS-----       | 38  |
| DmelGr22b  | IFPFTLD SG-----K    | 38  |
| DmelGr22c  | VFPYRFDS-----       | 36  |
| DmelGr22f  | LFPFTFDS-----       | 38  |
| DmelGr36a  | LINF EIDWQ-----     | 29  |
| DmelGr36c  | LSNF EFDWN-----     | 28  |
| DmelGr36b  | LSNF EFD CR-----    | 29  |
| DmelGr59d  | VINFKIDLK-----      | 29  |
| DmelGr59a  | MTSYETMG-----       | 24  |
| DmelGr59b  | ITSQQFSN-----       | 25  |
| AgamGr26   | TVPWEVT-L-----F     | 40  |
| AgamGr27   | LVAWDLQPL-----E     | 41  |
| AgamGr29   | TAPYPLDPY-----Q     | 41  |
| AgamGr31   | TAPYPLDPY-----Q     | 41  |
| AgamGr30   | FLPYPFDF-----Q      | 39  |
| AgamGr32a  | FLPFPAY-V-----L     | 39  |
| TcasGr2    | FFP--VQGV RG-----PD | 42  |
| TcasGr9    | FFP--VQGV RG-----PD | 42  |
| TcasGr7    | FFP--AQGILG-----RD  | 59  |
| TcasGr30   | FFP--AQGILG-----RD  | 59  |
| TcasGr29   | FFP--AQGILG-----RD  | 59  |
| AaegGr64f  | -MP--ISGYFR-----TP  | 10  |
| AaegGr64a3 | -MP--ISGYFR-----TP  | 10  |
| AgamGr14   | LIP--IDGYARS-----TD | 73  |
| AgamGr18   | LLP--VVNIFS-----AN  | 44  |
| AaegGr64d  | LMP--VVEIFS-----HN  | 74  |
| AgamGr17   | LFP--LGGLYG-----RT  | 35  |
| AaegGr64c  | LFP--VQGVFG-----RD  | 62  |
| DmelGr64c  | VLP--VAGVWPS-----CR | 40  |
| DmelGr64d  | VLP--LAGINPN-----GK | 49  |
| AgamGr20   | VFP--LSNITA-----TD  | 70  |
| AaegGr61a  | VFP--LNSVMN-----RL  | 64  |
| AgamGr21   | IFP--IYGVTR-----ND  | 90  |
| AaegGr64a  | -----               |     |
| DmelGr64a  | IMP--LVGIRE-----SN  | 85  |
| DmelGr61a  | IMP--LSNIRS-----RD  | 68  |
| AgamGr15   | IMP--VCGILA-----KD  | 77  |
| AaegGr1    | IMP--VCGIGQ-----KD  | 82  |
| DmelGr5a   | LMP--VCGISA-----PT  | 79  |
| DmelGr64f  | MMP--VKGVTG-----KH  | 103 |
| DmelGr64e  | LMP--VRKVSS-----KF  | 96  |
| AmelGr1    | LFP--VSGVNS-----PD  | 23  |
| AmelGr2    | MFP--VSGIGS-----SS  | 104 |
| AgamGr16   | LLP--LDGVWC-----GR  | 51  |
| AaegGr64e  | IFP--VVG YGV-----AL | 69  |
| TCasGr6    | VMP--IQRGEIG-----   | 77  |
| TcasGr26   | VMP--IQRGEIG-----   | 77  |
| TcasGr33   | VMP--IQRGEIG-----   | 77  |
| AgamGr23   | VMP--ITRSVPG-----   | 127 |
| AaegGr21a  | VMP--ILRSSPG-----   | 119 |
| TcasGr10   | VMP--IERSGKG-----   | 74  |
| TcasGr39   | VMP--IERSGKG-----   | 74  |
| AgamGr22   | VMP--IMRSPKG-----VD | 96  |
| AaegGr21b  | VMP--IVRSPKG-----VN | 96  |
| DmelGr21a  | VMP--IHRNPPE-----KN | 97  |
| AgamGr24   | VLP--YTRLPSG-----G  | 28  |
| AaegGr63a  | VFP--FSRPSPG-----V  | 93  |
| DmelGr63a  | VLP--IVRHGPA-----R  | 122 |
| TcasGr3    | IFP--IKNTEPG-----   | 85  |
| DmelOr83b  | LSGNTITTLFFT-----HC | 87  |
| AgamOr7    | LTANTITTLFFT-----HS | 85  |
| HvirOr2    | LTANTITVLFFA-----HT | 88  |
| TcasOr16   | LAANTITVLFFT-----HC | 186 |
| TcasOr22   | LAANTITVLFFT-----HC | 225 |
| AmelOr2    | LTANTITMLFFT-----HS | 85  |

|           |                                           |     |
|-----------|-------------------------------------------|-----|
| TcasGr31  | -----                                     |     |
| TcasGr35  | -----                                     |     |
| DmelGr59c | LAVGVSN-----FE                            | 25  |
| DmelGr92a | VIFF-----                                 | 33  |
| DmelGr28a | LAPFRLN-----                              | 36  |
| DmelGr64b | LLPVSNVR-----ALD                          | 33  |
| TcasGr71  | MTP-----                                  | 21  |
| AgamGr19  | QFP-----                                  | 21  |
| AaegGr64b | IIG-----                                  | 21  |
| DmelGr93d | LVCFRLRKQKDN-----N                        | 35  |
| TcasGr34  | IGP-----                                  | 20  |
| TcasGr43  | LTP-----                                  | 20  |
| TcasGr47  | G-----                                    | 18  |
| AmelGr3   | LVPVRFVHTS-----                           | 44  |
| AgamGr32b | LAPYPLS-----VF                            | 39  |
| AgamGr50  | VLP-----                                  | 25  |
| TcasGr20  | FLPVCS-----                               | 32  |
| TcasGr79  | LTP-----                                  | 20  |
| TcasGr15  | ITP-----                                  | 20  |
| TcasGr60  | LID-----                                  | 18  |
| AgamGr38  | LVLKMSG-----MG                            | 39  |
| TcasGr51  | ILGDTVEIFNSLFG-----YQIILVIFDCCLETVSALNGAF | 264 |
| DmelGr39b | LVP-----                                  | 19  |
| AgamGr28  | NVP-----                                  | 33  |
| TcasGr61  | FMHKKSFKNFVN-----NVAAL                    | 118 |
| TcasGr50  | LLP-----                                  | 21  |
| AgamGr12  | LVPCR-----                                | 24  |
| AgamGr36  | LTAFS-----                                | 31  |
| AgamGr48  | LVPYELN-----                              | 25  |
| AgamGr49a | ADRATTTLG-----R                           | 42  |
| AgamGr49b | FVPLHFN-----                              | 29  |
| DmelGr2a  | LWPWRLAPPPD-----S                         | 34  |
| DmelGr32a | LMPIYEQVS-----                            | 77  |
| DmelGr68a | ILPFYSG-----DV                            | 27  |
| AmelGr7   | MGLTGIEAK-----                            | 31  |
| AmelGr8   | LIYYIAFIN-----R                           | 39  |
| AmelGr9   | YFPYKWR-----                              | 42  |
| TcasGr57  | N-----                                    | 16  |
| TcasGr41  | ICVP-----                                 | 28  |
| AgamGr34  | LAPFELN-----                              | 32  |
| AgamGr35  | LTPGLMD-----                              | 57  |
| AgamGr39  | LISFTT-----                               | 31  |
| AgamGr40  | IFT-----                                  | 27  |
| AaegGr28d | FHFET-----                                | 29  |
| AgamGr42  | LFPYTISQAKGR-----SF                       | 43  |
| AgamGr41  | IHVLN-----                                | 43  |
| AgamGr43  | LQLHDS-----Y                              | 33  |
| DmelGr33a | LCLLDSCN-----SVC                          | 65  |
| AgamGr44  | YLTITYD-----                              | 29  |
| AgamGr13  | LVPFRYN-----                              | 25  |
| AgamGr45  | CKSDKCVKIGTADIP-----V                     | 62  |
| AgamGr46  | LWPFGG-----                               | 44  |
| Dmelr93a  | LLVLSSSL-----                             | 39  |
| AmelGr6   | LAPYDFTG-----D                            | 79  |
| AmelGr10  | CTALCAS-----                              | 25  |
| TcasGr28  | AYP-----                                  | 25  |
| TcasGr40  | VFP-----                                  | 42  |
| AgamGr3   | FFNFPLK-----                              | 34  |
| AgamGr4   | FIPFP-----                                | 57  |
| AgamGr6   | FTP-----                                  | 55  |
| AgamGr7   | VLTFCIER-----                             | 49  |
| AgamGr47  | YMELLDN-----V                             | 43  |
| DmelGr8a  | FHGLPLP-----                              | 27  |
| AgamGr5   | MEPLEQWYVLSG-----YVRFHQ                   | 69  |
| AgamGr8   | LQWFS-----                                | 20  |
| DmelGr9a  | LVCG-----                                 | 21  |
| DmelGr59f | LISVLAN-----                              | 48  |
| DmelGr77a | LMATAN-----                               | 54  |
| DmelGr85a | ILDFN-----                                | 43  |
| TcasGr27  | VHVHEN-----                               | 27  |

|            |                                                                |     |
|------------|----------------------------------------------------------------|-----|
| TcasGr48   | LFP-----                                                       | 37  |
| AgamGr1    | VSSLIVD-----                                                   | 32  |
| DmelGr10a  | QVVIDY-----                                                    | 36  |
| DmelGr59e  | VYP-----                                                       | 21  |
| DmelGr10b  | FSSHYYN-----                                                   | 29  |
| DmelGr89a  | LAPFRTS-----                                                   | 28  |
| DmelGr57a  | CNGFGIR-----                                                   | 35  |
| DmelGr47b  | LVTIRVRSP-----D                                                | 32  |
| DmelGr58a  | LMPAPLK-----                                                   | 21  |
| DmelGr58b  | LMSTTLR-----I                                                  | 29  |
| DmelGr98a  | MLPFG-----                                                     | 29  |
| AaegGr93a  | LRCVRFDR-----                                                  | 32  |
| TcasGr19   | LHSLKN-----                                                    | 31  |
| DmelGr47a  | LNG-----                                                       | 20  |
| DmelGr58c  | LCNLHYD-----                                                   | 25  |
|            |                                                                |     |
| TcasGr38   | GFVTFCTRSNFRSSKLLILYNIILQVLFVSVFVSYWLYLVLEADDMLPIYKNTYLIILFA   | 102 |
| TcasGr46   | GFVTFCTRSNFRSSKLLILYNIILQVLFVSVFVSYWLYLVLEADDMLPIYKNTYLIILFA   | 84  |
| TcasGr1    | CLVNFNHRSEYFRLSKAKSFCTFVAALVYCSVTFFALSELTDLATSILLKVSSLLIGFC    | 83  |
| TcasGr123  | GLVTFTPDRSKFRPSSLRFCNLNLSIFTYVPMILYCVYTTAT-YDSFMIYKTTNIILGL    | 84  |
| TcasGr62   | GLVTFTPDRSKFRPSSLRFCNLNLSIFTYVPMILYCVYTTAT-YDSFMIYKTTNIILGL    | 359 |
| TcasGr25   | -----M                                                         | 1   |
| TcasGr59   | KLKHMILWKSYKRTQIFITCELEFFVILLWISFFLNFMLHCNNTTWRCLYRWIVLYTLSKM  | 176 |
| AgamGr2    | HLAGEGVLINNGRMRRYSIVLLLLMLLFEAIITVYSFVAFEEFNWAWLIWFITTIPTAL    | 92  |
| AaegGr66a  | KLAGENIPVDNGLRRLRYVILLVLFVFEAILTTYNFVEFSEAYTLLSLMWFITTFPTAI    | 180 |
| DmelGr66a  | RLYKEGCVMDNSTIGRRIRIMLIMTVIFELSILVSTYVKLVVYSQWMSLLWIVSAIPTFI   | 188 |
| TcasGr11   | ----KGEKQHKSDYFYFSFYITSYTLLSVYSLFRIATNENNSLVINKRLIFIECFVMMA    | 100 |
| TcasGr55   | ----KGEKQHKSDYFYFSFYITSYTLLSVYSLFRIATNENNSLVINKRLIFIECFVMMA    | 100 |
| TcasGr21   | VENGGKVKFAWWPLTRNALLVILLGALTYHAIFDLISFKSDSLQKLRVFEVFSLL        | 99  |
| TcasGr56   | VENGGKVKFAWWPLTRNALLVILLGALTYHAIFDLISFKSDSLQKLRVFEVFSLL        | 99  |
| AaegGr     | RRRHDSALECTIFGYVNSFIHAATFCTCYVITLVK-HESVTAHFDFSEISTLGDILQIIV   | 98  |
| AaegGr28a  | -----                                                          |     |
| AgamGr33   | GPTELMMLRCTPFYINSSVHILFCSCYVNALLQ-GDTITRFFFRTDISTLGDVLQFTI     | 96  |
| DmelGr28bB | RKMGESYLKMSCFGVFNIFIYICLCGFCYISSLRQ-GESIVGYFFRTEISTIGDRLQIFN   | 98  |
| DmelGr28bC | TKTGKKAIKKTFYINGIMHIAMFVFAYSLTINYNCESVASYFFRSRITYFGDLMQIVS     | 125 |
| DmelGr28bD | -QAGERQFHLSKIGYLNALFLQSFYSYCFLAALIE-QQSIVGYFFKSEISQMGDSLQKFI   | 95  |
| DmelGr28bA | NALGENSLEQSWYGFNLAIFRWLLLAYCYSYINLR-NESLIGYFMRNHVSQISTRVHDVG   | 107 |
| DmelGr28bE | SSEGRGKLTSSYIGYINIIIRMAIYMVNSFYGAVN-RDTLMSNFFLTDISNVIDALQKIN   | 100 |
| AgamGr25   | PIGQIVDYKRSVFLIAYSVGLVFCLAGLTYKGIFFDVTSKPPIRMKTATSKVVTILDVSV   | 87  |
| AaegGr43a  | SKGQIVDYKRNVLVVIYGLGIVFCLAGLTYKGIFFDINSKPPIRMKTATSKVVTILDVSV   | 87  |
| DmelGr43a  | SKG-RVEIGRSWLFVTSATLTVMMVFLTYRGLLFDANSEIPVRMKSATSKVVTALDVSV    | 86  |
| AgamGr37b  | SQ-PSNDRKELYAFGYSASFICVYSYAIYGLFTTNTGH--LYI-SKIVAVMENGMYMFC    | 89  |
| AgamGr37d  | MK-PVNRYLEFCYVLVYGG---MYTYALYSFLFVANVTD--FHL-SLIIGTIECNLSC     | 85  |
| AgamGr37a  | ADTPDRDAFGTWRKLYTISFGLVYTLAFIKFISELKHTG--FSA-SMIEGKGERMYFTF    | 99  |
| AgamGr37c  | KRTRLPYRCVNILSFVLST---LFYGYLLFSISLDSGVLK--AGIKSLIVTRMHDLYFVL   | 87  |
| AgamGr37e  | KRTLLGYKLCNLLAIAFSA---TFYGFLLLFHSLDLETIK--LGSGSLITSRMHDVYFVS   | 87  |
| AgamGr37f  | NR-RLLSVLNVILLLIGT---LYINGPCR-QIRKDMRL--FQS-SPLAVNSRIFTYLM     | 89  |
| AaegGr28c  | RQSOLHYRLINLISLTFIG---CFHGLLMIHFLGNDFTR--YSTGVSIVQQMLYAFYVA    | 87  |
| AaegGr28b  | GFGKRSMIFTWSDIFPIIRLLCLQATSLSYISYAMADHMES--TGS--NIMDFGLKYNLAI  | 99  |
| AaegGr28e  | GLGKRSMIFTWSDIFPIIRLLCLQATSLSYISYAMADHMES--TGS--NIMDFGLKYNLAI  | 99  |
| TcasGr14   | LPKTPPLPLTLLYKLLGIIQFPISAHFSFMSRFLCLPF-YSYFFYLSYIYTTYSRKLSGIF  | 62  |
| TcasGr49   | LPKTPPLPLTLLYKLLGIIQFPISAHFSFMSRFLCLPF-YSYFFYLSYIYTTYSRKLSGIF  | 106 |
| AmelGr4    | NNRRNSKIWSKNVFLVNSKLGILYNLFSVFLIITLNFSLMPLIFYAEYAFRTNITII      | 92  |
| AmelGr5    | NNRANLNKKNSENTMFFISSKLGILYNLFGSCLIIALSFSYIPITMYADYVHKTIIVTITI  | 92  |
| TcasGr16   | VNYSKIGIVQTVAYFVIFIIILTIVFFEKRSALSPFELIQIRTINVFATFRITIANIILMAV | 91  |
| TcasGr22   | -----MFRDLG---STTM                                             | 10  |
| TcasGr17   | SPLKVLQTVILGTTTCIYLTSLYIWFILTQMTFS--GVTSPITMKFVLSFRGTGFTFLMVV  | 86  |
| TcasGr150  | SPLKVLQTVILGTTTCIYLTSLYIWFILTQMTFS--GVTSPITMKFVLSFRGTGFTFLMVV  | 86  |
| TcasGr32   | RKNRTTCPEKIYAYGVVAFITLGVAVSVFYRAKDY-----AKFIHIKAVVQITLDATL     | 75  |
| TcasGr54   | RKNRTTCPEKIYAYGVVAFITLGVAVSVFYRAKDY-----AKFIHIKAVVQITLDATL     | 75  |
| TcasGr37   | -TKEKRFPHRIHSYFMVAFYVVFSSVSTFFKIPFY-----STLRPINLLVQIILDVIL     | 68  |
| TcasGr53   | -TKEKRFPHRIHSYFMVAFYVVFSSVSTFFKIPFY-----STLRPINLLVQIILDVIL     | 68  |
| TcasGr5    | SVEPTGFSKPGYSLWILLFTLGVTTISGVYRTDFY-----KKLSPMRLIVQTCDFLL      | 74  |
| TcasGr12   | ---VKFYVQKFYVVLAFLLTAGAIIISLVYQAPVY-----KELTDIKLVNLISDVTL      | 71  |
| TcasGr13   | ---VKFYVQKFYVVLAFLLTAGAIIISLVYQAPVY-----KELTDIKLVNLISDVTL      | 145 |
| TcasGr104  | SFEKPDQSLSLWKKIQGVVLSIIAAGTAYSIVR-HTYYRRLYTITH-LVLDYLDEFLLI    | 88  |
| TcasGr45   | SFEKPDQSLSLWKKIQGVVLSIIAAGTAYSIVR-HTYYRRLYTITH-LVLDYLDEFLLI    | 88  |
| TcasGr98   | DFENFVIIISPRCDKISAIACFLSTILGTCWIIYVRIYCKEIRFFEISF-EILGSLDSLIL  | 88  |
| TcasGr52   | QYIN-----RSELITS-KIVSFVNSIFL                                   | 27  |

TcasGr105 NFEKFSLEHQWLQKIQAWTYLLILLTTWTVISASTR--IKSFKFLTIGVGITTDIDRVFT 85  
TcasGr4 -----KKKLVCYCIIFGAIATLTCIEGLRDCPRKYSTPLAKITITLQRYC 73  
TcasGr44 -----KKKLVCYCIIFGAIATLTCIEGLRDCPRKYSTPLAKITITLQRYC 77  
AgamGr9a EEDGLFRSTRHATSKFVLSFTVSVLACSYLMHCSIDDDYDKLSVN--GIWPLVYVHNAT 84  
AgamGr9c EEDGLFRSTRHATSKFVLSFTVSMVASSHLIYRGVKDYDQLSVD--GIWPLIYVVHYAM 82  
AgamGr9b SGSNPFKSTNNAAPKFMILFALSLLTSGHSIFRGTIDNSVIDALDQGTIWPFFVYLHVQIT 133  
AgamGr9d HTGNTFECSRHAALKFVIFLITLACSGYSMYRNILDYPAMAAMNNTAIEPFFYIAHTIT 86  
AgamGr9e GEQCSYR--RPTTHQCVTHFLLVLFISIGFLLYCIWEQYSIF-AMAIYAFDDATFILLSTAS 79  
AgamGr9f VRHRSYR--KPTPFQFSVQLLYSLCCITFTSFRVWVQFSVHSQIEHEMLENISFIVSTAS 80  
AgamGr9g PGKHTFISVPYAPLKFSCFLTAALLSSGYLLWRSPMDYIVY-KLDTRMFDITIFIINTTI 81  
AgamGr9i SEKHTFNSVQNARFKFSCFLFAVALISSGYLLWRSPMDYSVY-KFDSKIFDITIFIINTII 81  
AgamGr9h STSDRFVVPKSLTIKFGFWIVTLLAIGCYSLIRTKQDVLER-SQKESYFDYVLFVSNMM 88  
AgamGr9j IRTGLFDCSYRNTLVCCVNVVFFGGFVWYDFGMIL-KFYAT----LPIVLVGILTVDVTV 121  
AgamGr9l FRTHMFESWTNMVALVLNIVLHSLCLWLDLNAIK-ISIGY----MSFVMLGVIVIYLV 111  
AgamGr9k QTTQRFVQQRNLVSVFGVIGLLSFTFFYHDFIQN-VFFAN----LPPFAFAIVLLELLL 111  
AgamGr9m AVEHRFIEKRSNLIIPFAIGLLLSIGFIYHDFIIVLPNFNTD----QSAFTLAVFIVELTV 108  
AgamGr9n EELGRFEATKRNLAFLGAALVLTISFVWYDIHLMATNFLTHT----YTTVFAAVGGIELLI 82  
AgamGr10 EELGHFVATKSNLTVFGVALVLTISFVWYDIHLMATNVLRT----YTTVFAAVGGIELLI 82  
AgamGr11 TETDQFEQRTVNKLAFVAVGIGMTPFFWYFDLKFMAFYLEN----ISPIMVAVGSIEIAV 82  
DmelGr23aA QLGWLFSLAIRCCWIVYFIYLLDVAISFSWVAIENVGNAVGTMLFVG-----NSV 79  
DmelGr23aB RLSRLVLWLQFLG-WLWTFISMWTQSVIYAQTIDCTLDLDCSLRHILTF-----QTV 80  
DmelGr39aA LHIYWLHG--TWSSTAIQIVVGVFMAALLGALAES-LYMETKSQTG-----NTF 76  
DmelGr39aB KKKFRLRR--SVLCYIVHFALQAYLVGCLISVMVTYWRRCFKSELTTTG-----NHF 77  
DmelGr39aC KCLVRENASERSAWLYLIGVVGITCSLIVYSTYFPPSHFIMGKHNTTG-----NCY 80  
DmelGr39aD HCQLVATSGSERYAVVYAGCILVSTTAGFIFALLHPSRFHIAIYNQTG-----NFY 79  
DmelGr98c RTLKRKRRCWMAGYSLYLIAILLMVFEYFHANIVSLHLEIYKFHVEDFSKVMGRTOQKFL 94  
DmelGr98d RTLHKRRRGVILGYACYLISISLMVIYECYANIVALQKDIHKFHAEDSSKVMGNTQKVL 92  
DmelGr98b HTPHRRLRWYLMGTGYVYATAILATVFIIVSYFNIIAIDEVLEYNVSDFTVRMGNIQKSL 92  
AgamGr51 HR-ERFRNRTKDVLSTVLLVLYAIVGPIVCELYVMNISVEN-QITNALSASFQAFVYF 112  
AgamGr52 VGPGRFFTSRKCALYCSGITVVYAVLSPALMYLIEYHERVANV-YLVSMNLAAQLSFIYL 108  
DmelGr94a ----RYRAGRERFRFSKANLAFASLWAIASFSLVYGRQIYKEYQEGQINLKDATTLSYSYM 88  
DmelGr97a ----RFSF--RRKKFVFSKGLTIYSLFVATFFALFYIWNINNEISTGQINLRTDIGIYCYM 107  
DmelGr93b SQ--LVAINRRGYLWICLVIRLLASCIFYGYSYDAWSGQYEDMYLRAFFGFRLIGCLICSV 109  
DmelGr93c SDDSLVVRNRHQFKWFCLSRLISVTAVCCFCAPYVADIEDPYERLLQCFRLSASLICGI 99  
DmelGr22d -KKRRLRRSMWLIPFGVVISSSLILMVKQSAEDREHGIMLDVFORNALLYQISSLMGVV 95  
DmelGr22e -WTRTLRRSKWLIAYGFVLNAAFILLVLTNDTES-ETPLRMEVFRNALAEQINGIHDIQ 95  
DmelGr22a -RKRLNRSKWLLAYGLVNLTLILVLSMLPSTDD-HNSVKVEVFORNPLVKVQVEELVEVI 96  
DmelGr22b -RIRQLRRSRCLTLYGLVLN-YFLIFTLIRLAFEYRKHK-LEAFKRNPVLEMINVIGII 95  
DmelGr22c -RNGQLKRSRFLFYGLILN-FFLLKLMVCSGGQ-KLGI-PEAFARNSVLENTHYTTGML 92  
DmelGr22f -RRKQLKRSRWLLLYGFVLHSLAMCLAMSSHLASKQRRK-YNAFERNPLLEKIYMQFQVT 96  
DmelGr36a --RGRVVAQRGILFAIAIN-VLICMVLLLQISKKFN-LDVYFGRANQLHQYVIIVMVSL 85  
DmelGr36c --TGRVFTKKWSTLYAIALD-SCIFALYIYHWTGNTNIVNAIFGRANMLHEYVVAILTGL 85  
DmelGr36b --TGRVFKSRRCTIYAFMAN-IFILITIIYNFTAHDG-TNLLFQSAKHLHEYVIMSGL 85  
DmelGr59d --TGQALVTRGATLISVSTH-THIFALLLYQTMRSV-VNVMWKYANSLHEYVIVIAGF 85  
DmelGr59a ---GKFRQSRITRIYCLLIN-AIFLTLPLSAFWKSAK-LLSTADWMPYSYMRVTPYIMCTI 79  
DmelGr59b ---RKFFSTLFSRTYALIAN-IVTLIMLPIMWQVQL-VFQKKTFFPKLILITNNVREAV 80  
AgamGr26 AHVTQPLSSWRERLFRTLNALSALGLAVLSATVLQHAEE----FDHMHMPFVTHMLYISE 96  
AgamGr27 PDRPTTKLHWFRKLIRATNQGYCFMIIVAIGTATVLHSS----NTANAFFAIRTLTYL 97  
AgamGr29 RATRNYQAKCSRLVALFRRTLSLLLFTVILAAPFLYHLYSGQIYAYTIPLSVKLMYYVQ 101  
AgamGr31 HIKPYQSKSFQNTINILRLLAALLFGIALSVPFLLYFLKADHVNAFKIPLSIRLMFYLQ 101  
AgamGr30 RQAEVKNIVLQKMLTILNRTFGLAMIGTVLTCVSLYVCYPSYMYEEDYPPVLNIAHYL 99  
AgamGr32a RQDVERLHFRTLVLTLCLNLTFAVLIFLTSFVCYLAAMYIYYPDLMYKENLPAVLQIMYHVE 99  
TcasGr2 FRSLRFSWKSARVVYALFLLGTFLLISGFQMQKIATKG-LDLLEANR-----LFFFL 93  
TcasGr9 FRSLRFSWKSARVVYALFLLGTFLLISGFQMQKIATKG-LDLLEANR-----LFFFL 93  
TcasGr7 FRAIHFTWASARVGYTIVTILGATFVTVLQLHKIFAKG-LNVIEANR-----LFFYC 110  
TcasGr30 FRAIHFTWASARVGYTIVTILGATFVTVLQLHKIFAKG-LNVIEANR-----LFFYC 110  
TcasGr29 FRAIHFTWASARVGYTIVTILGATFVTVLQLHKIFAKG-LNVIEANR-----LFFYC 110  
AaegGr64f ISKLFKTLKSVHFAYGCFVTFIMGAIMMFFAFRIQRGTFGIGATTT-----CIYYA 62  
AaegGr64a3 ISKLFKTLKSVHFAYGCFVTFIMGAIMMFFAFRIQRGTFGIGATTT-----CIYYA 62  
AgamGr14 PRDVRMLRSVQFVYGCVTLPIMLTLIIMLCVHTAHEPSFGVQQATS-----LVYYA 125  
AgamGr18 YRTARFKLRSFRCIYSLVYLALGTIYCTLFIWYIRKG-LNLAYFAN-----CIYMV 95  
AaegGr64d PRNTRFKLLSVRFAYTAIYLAAGFYSLACRRFILRG-LNVSSFAD-----MFYLM 125  
AgamGr17 LQDIRFRWFGPTVYSFYFLLSGLLTLVAHIYSLTVETLGTSEISN-----LIYYV 87  
AaegGr64c LQQIRFQWLHLRRTLISLTLVLAALIIIAQINHTV-VSTANTSMITS-----LVYYI 113  
DmelGr64c PERVFRWISLSLLAALILVFSIVDCALSSKVVFDHG-LKIYTIYS-----LSFSV 91  
DmelGr64d PENVRFRWFSPYILFFVVAFTFVIADFMLSTKIVLNDG-LQLYTMGS-----LSFSV 100  
AgamGr20 PSAFRFHYFSPYIVLSALSIVGGLFIMAAALVRLNRVG-INAMNIAE-----PIFFG 121  
AaegGr61a PGNMLYKSVSFATALSMMAIFGGYAVSLLSLKRLARTG-LDAINMAE-----PFFFA 115  
AgamGr21 PKRFRWKWFSRLVILNLTVVVTTALLQAYYEGRLKAIG-INAKNVSS-----LIFFI 141  
AaegGr64a -----MRLRMVG-VNAKNING-----LIFFV 20

DmelGr64a PRRVRFAYKSI PMFVTLIFMIATSILFSLSMFTHLLKIG-ITAKNFVG-----LVFFG 136  
DmelGr61a PQDVKFKVRSIGLAVTGLFLLLGGMKTLVGANILFTEG-LNAKNIVG-----LVFLI 119  
AgamGr15 PRKLRFSYTAGRTFYAYFCAIGIGFLATMSVYFFASKR-YHFQKMVT-----AFFYC 128  
AaegGr1 TTKLHFSWKSKRIFYSYAACMGTAFLAVTSTIRFVDRN-FNF SRLTG-----FFYF 133  
DmelGr5a YRGLSFRNRSWRFWYSSLYLCTSVDLAFSIRRVAHSV-LDVRVSEP-----IVFHV 130  
DmelGr64f PSDLSFSWRNIRTCFSLFLFIASSLANFGLSLFKVLNNP-ISFN SIKP-----IFRG 154  
DmelGr64e AEDLTFTWFSVRSYYALVTILFFGVSSGYMVAFTSVS-FNFDSVET-----LVFYL 147  
AmelGr1 SSYLRFTWRS PKFIYCTISFLSSS IMTIFNVLRIVTTG-ISSIKMTT-----FVFNG 74  
AmelGr2 LSKLQFKIFSLTMYSGFIALMISFM TIVSMIHMLKTFNASTFQIRGGLGAATVGA VFY 164  
AgamGr16 WWSIHWRLLSWRNLYALFVQLGALIMACFSFATFWYSG-VEFAKIMS-----WFFFT 102  
AaegGr64e AERIQFKWCSLRMLYTMFQLGGAIMSGFSLATFWTTG-VEFSKILS-----WMFFT 120  
TCasGr6 --RITFGWTSIPMLYAYVFYVVTTLVVLVGVYERFDILLN--KSK----- 118  
TcasGr26 --RITFGWTSIPMLYAYVFYVVTTLVVLVGVYERFDILLN--KSK----- 118  
TcasGr33 --RITFGWTSIPMLYAYVFYVVTTLVVLVGVYERFDILLN--KSK----- 118  
AgamGr23 --RITFSWRSAA SIYAF CFYLVSTVIVLVGVYERIKVFQT--TKKFDEYIYGILFVIFLV 183  
AaegGr21a --RITFDWRSWAS IYAYCFYVSTVIVLVGVYERLKIQLD--TKKFDEYIYGVLFIFLV 175  
TcasGr10 --RTTFRWLSSTSIYAYFIFGAETIFVTMVFKERLYLILR-PGKRFDEYIYGIIFLSILI 131  
TcasGr39 --RTTFRWLSSTSIYAYFIFGAETIFVTMVFKERLYLILR-PGKRFDEYIYGIIFLSILI 131  
AgamGr22 MPRTTFTWCSKAFLWAYFIYACETVIVLVVARERINKFISTSDKRFDEVIYNIIFMSIMV 156  
AaegGr21b MPRTTFTWFSKAFIWAYFIYACETVIVLVVAKERIKRFISTSDKRFDEVIYNIIFMSLLV 156  
DmelGr21a LPRTGYSWGSKQVMWAIFIYSCQTTIVLVLRERVKFKVTS PDKRFDEAIYNIYIFISLLF 157  
AgamGr24 ---TAFVLASPSMTYCVLFFLLLVYIAFILLNRIEIVRT-LEGRFEESVIAYLFI VNIL 84  
AaegGr63a ---TLFACAS PAMAYCGVLFVTLMA YVIYITILRVHIVRT-LEGRFEEAVIAYLFI VNIL 149  
DmelGr63a ---AKFEMNSASF IYSVVFFVLLLAC YVYVANNRIHIVRS-LSGPFEEAVIAYLFI VNIL 178  
TcasGr3 ----MFRVAP ELLGYSVVVFFVVMGYIGFIEWDKVEIVRS-QEGRFEEAVIDYLF TVYLL 140  
DmelOr83b ITKFIYLA VNQKNFYRTLNIWNQVNT HPLFAESDARYHSIALAKMRKLLFVMLTTVASA 147  
AgamOr7 VTKFIYFAVNS ENFYRTLAIWNQTNTHPLFAESDARYHSIALAKMRKLLVLMATTVLSV 145  
HvirOr2 I IKLAFFALNSK SFYRTLAVWNQSN SHPLFTESDARYHQIALTKMRLLYFICGMTVLSV 148  
TcasOr16 VTKFVYFAVRSKLFYRTLGIWNQPN SHPLFVESNNRYHGIALKMRLLYIIIIWTSFSA 246  
TcasOr22 VTKFVYFAVRSKLFYRTLGIWNQPN SHPLFVESNNRYHGIALKMRLLYIIIIWTSFSA 285  
AmelOr2 VVKLVYFAVRSKLFYRTLGIWNQPN SHPLFAESNARYHQIAVKKMRILLLAVIIGTTVLSA 145  
TcasGr31 -MGSVAINHSLKRLKIIITIVLVVATGNI IHTTSNKQ-----LQFFAV 43  
TcasGr35 ---MRLKWYIITISMAFIIFVSL EYHIYTVVEESGFENFVKTYLVSDFENYVTFFC SLF 57  
DmelGr59c VDWLITGEAIATRRTTIIYA AVHNASLITLLILFNLGNNSLKSEFISARYLHEYF FMLMTAV 85  
DmelGr92a --CLHTRKDDKTVFIRNWLKWLNVTHRIITFTRFFWVYIASISIKTNRVLQV LHGMRLVL 91  
DmelGr28a --LNP RKEVQTSKFSFFAGIVHFLFVLCFGISVKEGDSIIGYFFQTNITRFSDGTLRLT 94  
DmelGr64b VADIRFRWCSPRILYSLIGLNLSEFGAVIN YVIKVTINFHSTS-----LSLYI 84  
TcasGr71 ----SRPKTRAKIYALCVVTALVTPSALSIIYYRQPIYAKISETKSIVAMVMGTIVNAF 76  
AgamGr19 -LYGVLTRKPLRWHFRWCSLQTVLSLGLIHVGLF LCFVEYDRLKAIGVNADNLIGPLFYL 80  
AaegGr64b ----TYFFVDTAII VCLTVL MASGWRRFLHEVEKLELIWTRWPYNLRRDNLKLNCWILTM 77  
DmelGr93d VWLEEIWSNRSRWKWI SVTLRIVPLCIYAF TYAEWISNRMLITEKFLHSCSLVVSIPCYL 95  
TcasGr34 -----KSNKIYSFLLTTLTLLVLS SIDRPYLKSYTYIKLVVS-----VLM 62  
TcasGr43 --RSIKLEKQTFIQKFYAVAFFLALSIGVVVSIYKSFHRNEIHIKIVLMFFK EASLYCF 78  
TcasGr47 -----KLWPI SIVLYTVGVVYSFKRRIFYQDESPISRLVYIGTDSL SYFIS 64  
AmelGr3 -EGCQARLNIIDLIYSLCVLVL LLSAEIWGLWRDLKDGWEYSTRLKSRTAVIATCSDVLG 103  
AgamGr32b QRNCSTRSVRIRIIICFRYAFATCVTVAVVASQFTMFYYPHIMYQPKVPIFIVILYIV 99  
AgamGr50 FQYVVSTNRFVQSTFH YRGCIVGTVLYAMVGPWLYWISVTRILHPDSQLNQYMI VVQFIC 85  
TcasGr20 SQKGQKTCLNLSIN YCICGYIFSAILFSL SILGLTEDLNSAPIRMKNPIVKYIILIDLGE 92  
TcasGr79 KSRIEKKPSRQKQFYALFIFFYTFGEVFTLVLRIRNMEYRSQTLMQTTLRLIRDLSLYF 80  
TcasGr15 -SSIYDKPTKLYQKLYPVMFLYITITEIYSVYERRYMNAHLSG IQLVVRNLLDISLYLN 79  
TcasGr60 --WYTVCLVPLNYPQFFLAVQYPRIVSTFNIVFYMYT LILEERFKLINLIKQEEFFSP 76  
AgamGr38 CITPRAGVRNGSTM TLLIDIGLFVTNLILAVTMMIYGMFITQRHMQSPIMF IGLKMNFT 99  
TcasGr51 LYTINGQGQFNIE MF LCNMSLLTVIPIHVWTSKEKISFLRGFWLSPAVDMFYEFQI IELM 324  
DmelGr39b --WSESCAQSKFVQKVYSAILIILNAVHFGIS IYFPQSAELFSLMVNVIVFVARIVCVT 77  
AgamGr28 --CCLARDLPSRAYFKQARCLL TAGTFI IWVILCCYQATVKLLELP IFFTAVLYVNEMVL 91  
TcasGr61 DETLAKLGQYIN YETDYVCLAMTITGPLVIIGNIAMELWNMPRENI EPLPNVILACHML 178  
TcasGr50 ----VKKHHRLEKLVPCVYLT SF SVVLSLGSFIVSVYLT TTKIDNDGESI SLASGWLDLYL 77  
AgamGr12 -YCRKENKFKVNPYLSLLAFGINISLASVHLCFDWLQI WNGERRDASRIFNFLQMLHTLT 83  
AgamGr36 -IVGEPYVQVKVTGVEYVALLMNFVANLYCVYINVTNRLSRW TGSAVMNLGLGFLFPL 90  
AgamGr48 NQNGLRRSKCKRQWTLTIGCTTVVLVGVFSFCTVWLQDTLSFATFVDALLIRSLV LVEFTI 85  
AgamGr49a ALVWVFTMSHDVAITKAVLVLIKFCGQLYGILPLASNAFTFERSRPVLWYSRTIALLLMV 102  
AgamGr49b KQLQTFQISRWLT VWSHALATLLCVYPPYVILLTGIRYPKLTLVNYLVMMQCSLHYVN 89  
DmelGr2a EGIQLRRSRWLELYGWTVLI AATSFYVGLFQESSVEEKQDESESTISSIGHTVDFIQLVG 94  
DmelGr32a -DYEVGPPTKTNEFY SFFVRGVVHALTIFNVYSLF TPI SAQLFFSYRETDNVNQWIELLL 136  
DmelGr68a DDGFRFGGLGRWYGR LVALIILIGSLTLGEDVLFASKEYRLVASAQGDTEEINRTIETLL 87  
AmelGr7 KPSKKLEYVYTL CNLVLFYFINKLTL PYYDKYVISTFELSRFIQW MFHANIWTITLLI 91  
AmelGr8 FMGFLPYKLESSKFMYSKLYSVFSTIIIIIVYFLAIFSLYEINFYIVMNDGLPRILHRNS 99  
AmelGr9 ---RPVYLF SKTRFVISTFILL SIFIWFNLFYQLNFTDI IKKNTTEVIHENMYALLIGI 99  
TcasGr57 ---TVTPVSLRFLKLYTIVHIFII IALYAHSSYGRENFIYGSNMNTVAITDKIANFMLTFF 73  
TcasGr41 --KITSTNNEVPRWYICYTIGV IITIGCLC IWSIFNKWNQFRSYSNFSVFLFDIITIVTL 86

AgamGr34 ----TSRVRLSKPFCVAVGGFVTLTYWTAMVSSIATSNHANDRISRISNYFQLITNAIMLT 88  
 AgamGr35 RQKDRYVRVNRTRWMLLIVLLLVVAVIALFETFFIERTALITGIANHIQFLMNTIALTV 117  
 AgamGr39 --TFDTVGIRRSFKDVLVVFQFMFFNCIVFKTGIPPKSDSPSYFDSLLIQVILGLFLTL 89  
 AgamGr40 ---HTIDFERQVLSNTRDQVLLVVAAILMDVYALTVSTRVSYFSNSILLNQVLYCSVNL 84  
 AaegGr28d --IDFSTQTLHRTLTDQFRFVFTLLLLDCYLVYKGIQSTSTYFYLTDSNIVNVGCSAFIL 87  
 AgamGr42 PSNSHSHNNRCNHSKTLKSEVKFIDIAIFTLWQTFFLQMLYVSWPKMFLNMPVRSRITMV 103  
 AgamGr41 ---FDTTDRPTLLELVLSFAITVIRIYMIYIILVTDAWDLIFVSSSQLVEKGLDIVLKI 100  
 AgamGr43 ETETNGKTPSLSIVRILYSIILFGAYLVGLYKAVELTFVVEFAANSPSIFKFAYMTQIYS 93  
 DmelGr33a KLSSHLFMHLGAFLYLTITLLSLYRKEFFQQFDARLNDIDAVIQKQCRVAEMDKVKVTA 125  
 AgamGr44 -RKRQELRVSTVLVVYSIVLAILCTFTYQSAQFLSSDMRYRNGIKESAVNKAIGAIQGV 88  
 AgamGr13 -FRKRRFDTCKPFVVPVATVLLLLFAAVQYRLGRLPERMKIPKVGMDIHAVENLVLNGN 84  
 AgamGr45 KRFKGKDGKPLAFSFIGVLHALGCSLAYASYHILSSLSQSGKLTDSNLVVRVAIDLKNQYI 122  
 AgamGr46 WSSRFNRCSTLYVLAVVTAYSAFHLYINYTDAYSVGTGEDGGKPGDSTPTVDRQQQVEA 104  
 Dmelr93a RDKLQLKATKQGSRRNFLHLIWRICIVVMIYAGLWPMPLTSAVIGKRLESYADVLALAQSMS 99  
 AmelGr6 EITPSNACLIFSFVFIGIYCHIYIVYKRFNLVRRDKAILSVEVETTKVIPTVLRDLMVTV 139  
 AmelGr10 ----KDNVKARRLRDIFIVFSMTLYLVSLVVIYIYVFSYEDSLKSTLIIIRVFLIYL 81  
 TcasGr28 -----QPSFHQTFSFVILFQFFGIMPLHGVSRKNVQIEIRLEWKSFRFVYAVYNI 77  
 TcasGr40 --LNHLNEEPEKLFHTFKSWKVLVYTSLSYGLFCASLSFYKAFKIGILLNQLITPLFFF 100  
 AgamGr3 -LHHADGLAIGHRWSSSVSILHLASAVISGILAKRHYNYLFGGLMLTDAMNMYFKYVI 93  
 AgamGr4 FDCCTFALTPCSNVRSLLHLPILQVSYFLTLFCIIMSNRVNFFFTGLQILSLNDIKYGT 117  
 AgamGr6 --VPLHGQALTSRLTLTIVFVSFYTTGEIIVLSYSLIKPEAVFFLSDATGTFADAIQFVI 113  
 AgamGr7 -RWLFADARTGTGINFIPFKTSITIVTHLVVLEALIARGVYRALDVRVASVDGALGHL 108  
 AgamGr47 TKVVEQEFHVRYPVIRVVQTFIVIVISSELIYLVVILAGYYLIDQTLNITDKLYASYM 103  
 DmelGr8a --GDGNPARTRRRMLMAWSLFLILSLSALVLAFLSAGEEFLYRGMDFGMCANDALKYVFAEL 85  
 AgamGr5 WLGFPYRLASGRVSPFAVLTLAQFLGVLVNLALIIYRRRCILYHCEAIGMVVDFIKLLT 129  
 AgamGr8 -----PKRYRTFDCESLFFITLNFCCIITGLFCWYIYQHQLVYSDNALGYVDFLKFLL 74  
 DmelGr9a -----WSGRRLGRLSSTFLVLILIELVGEIETYFTEENPDNEVSPAYFAKVI 75  
 DmelGr59f -TAPITILPGCPNRFYRLVHLSWMILWYGLFVLSYWEFVLTQVRVSLDRYLNAIESAI 107  
 DmelGr77a WSPRGIKRVRSYLYRIHGCVMILFVGCSPFAFWCIFQRMALRQNRILLMIGFNRYVL 114  
 DmelGr85a -TDIGTGNLRRYRVLFMRYLHNFAVISLTLKFLDFDTHFKYIESSTLITVNFYFTL 102  
 TcasGr27 ---PTYRLYKIFVVSFAVTFPSAWICALVNYNVSEISENFYYPAMSTGLKYAIFQKN 84  
 TcasGr48 -ITINIRKNGLNYNFTKCKCYFLRMVLIDLLIVGCILKHIFNLMKNVTLNDVVFIFCSAP 96  
 AgamGr1 -KRGNVRSGSAAKPFILAMLGLAISLAVWFILYHNESPVICRSKANQVRLFYFVVIETL 91  
 DmelGr10a --VPQRALKRGVVKVLLIAYGHLSMILLIVLPGYFCYHFRTLTDTLDRRLQLLFYVSFTN 94  
 DmelGr59e --SGRVGLRWLHTLWSLFLMYIWTGSIVKCLEFTVEIPTIEKLLYLMEFPNGMATIAI 79  
 DmelGr10b -PTRRRLVYSRILQTYDWLLMVINLGAFLYLYRYAMTYFLEGMFRQGVFNQVSTCNVFG 88  
 DmelGr89a --EPMVARCQRWMTLIAVFRWLLTSMAPFVLWKSAAMYEATNVRHSMVFKTIALATMTG 86  
 DmelGr57a -RSTFRISWASRIYSMSVAIAAFCCFLGSLSVLLAEEDIRERLAKADNLVLSISALELLM 94  
 DmelGr47b RGGAFSNRWTVCYALFTRSFVVICFMATVMTKLRDPMSAAMFGHLSPLVKAIPTWECLS 92  
 DmelGr58a --KGQFLLGKQRWYLIYTAACLHGGLLTVLPFTFPHYMYDDSYMSSNPVLKWTFLNLTNIT 79  
 DmelGr58b RSCRKCLRLEKVSRTYTYISFFVGIFFLNLVYFMVPRIMEDGYMKYINVLQWFFVMLFL 89  
 DmelGr98a -----QNLFSKGFYVLLFVSLGFSYWRFSFDYEFDYDFLNDRFSSTIDLSNFVALVL 83  
 AaegGr93a MKFSICKSCSSFAFIKWLWLLAVVLAALCLSSYAFYFVWCSEPVAGKYLQWISIIIVVFL 92  
 TcasGr19 --KRSGASLQVIGILDSLAVFKCNLRRRIYFYCVSITFNVHLLFLLCSGYFTVHLYFCPF 89  
 DmelGr47a -----LNTYYFDTKTNAFRVSSKLLKIYCAIHHALCVLALAHMSYSTASNLRVSVTVLT 73  
 DmelGr58c --SSNHRFILNHVPTVVYCVILNVVYLLVLPFALFVLTGNIYHCPDAGMFGVYVNVVALT 83

TcasGr38 DFAYLETTWICTLLKDKLLELFKRLIHFDTKCQ-----ENSTVIDYKRHKKRL 151  
 TcasGr46 DFAYLETTWICTLLKDKLLELFKRLIHFDTKCQ-----ENSTVIDYKRHKKRL 133  
 TcasGr1 ASIYVGTWINTSINGTKFIEFINKLIEFDVKLQ-----NVSLIINENQRTRS 132  
 TcasGr123 NVVYVVTAWICAITKRDMFVEFLLKLVDFDSKLQ-----TMNIKVNHRVHRKI 133  
 TcasGr62 NVVYVVTAWICAITKRDMFVEFLLKLVDFDSKLQ-----TMNIKVNHRVHRKI 408  
 TcasGr25 SQVMLIQFCAFVVVLKQKFCVNVQYIKQVCKLNN-----GHYKNFLS----- 43  
 TcasGr59 SQVMLIQFCAFVVVLKQKFCVNVQYIKQVCKLNN-----GHYKNFLS----- 218  
 AgamGr2 NSVCRIWYVMLVSAIRQRFNAMNHNMAIAHGIL-----HYKDQYAGEPDAD-- 139  
 AaegGr66a NSVSRIWFVVLVQSIRHRFHVNMNHHMDELAALLE-----EHNDRWEDDLEIE-- 227  
 DmelGr66a NTLDKIWFVAVSLYALKERFEAINATLEELVDTHE-----KHKLWLRGNQEVPPP 237  
 TcasGr11 ---LTLIVTLFTFLARGTLIKSFDMLSHVDVS---FIKAGFRLEYKQLLKRYSYLIISFVL 154  
 TcasGr55 ---LTLIVTLFTFLARGTLIKSFDMLSHVDVS---FIKAGFRLEYKQLLKRYSYLIISFVL 154  
 TcasGr21 SCCSVIFGCIFALK----VIEVFKNIEEVDVA---FRSLAVWVPYK-HLYVNILIHLSGL 151  
 TcasGr56 SCCSVIFGCIFALK----VIEVFKNIEEVDVA---FRSLAVWVPYK-HLYVNILIHLSGL 151  
 AaegGr GLVALIMTFGYSVFRRTVIDAFHALARTDLH---FKEIGVEFDYKSTLFRNYGLLFIQI 155  
 AaegGr28a -----MTFLYSIAQRHKLIAAFHSLARTDEH---LAEIGVEISYKKTFRNYMVVFLFQL 51  
 AgamGr33 GITALFMTFFCSIFQRNKLIKCFHALASIDRR---FKEIGMETNYKSTLHYNLLVMLTKA 153  
 DmelGr28bB GLIAGAVIYTSAILKRCKLLGTLTILHSLDTN---FSNIGVRVKYSRIFRYSLLVLIIFKL 155  
 DmelGr28bC GFIGVTVIYLTAFVFNHRLERCLQKQFHTMDVQ---LQTVGVKIMYSKVLRFYSVMVLISMF 182  
 DmelGr28bD GMTGMSILFLCSSIRVRLLIHIWDRISYIDDR---FLNLGVCFNYPAIMRLRLLQIFLIN 152  
 DmelGr28bA GIIAAVFTFILPLLLRKYFLKSVKNMVQVDTQ---LERLRSVPNFNTVVGQVVLVILAVV 164  
 DmelGr28bE GMLGIFAILLISLLNRKELLKLLATFDRLETEA--FPRVGVAMHQVAANKKMNRLVILV 158



AgamGr25 VVSACICGTLSSGIGGLHFVRELNRRLTEADEILSLYVKESTRSRRQRRKGILMLGLVCFI 147  
 AaegGr43a VVSACICGVFCVGLPFVRELNLQRLNEADDMLSMYFAAGKQD-MEKRRKGLSMLTVVGVV 146  
 DmelGr43a VVMACIVSGVYCGFLSNDTLELNDRLNLAIDNTLNAYN----NFRDRWRALGMAAVSLLA 142  
 AgamGr37b EFMVTNVAILGLVLRNRVLEIFVQLAEIDEQLNVLRLP-----IKHNRQHRLLTVLCS 143  
 AgamGr37d QYLTMVFAIVFAWVVKHRISFIIQLTHECDVQLSKISSP-----IDHRKHLHLKVSMLAV 139  
 AgamGr37a NFFTTMYGVVNGYAVRDKIEKMLYKHLAVDQKISQWKRN-----VDHRRFYRNVWAGVY 153  
 AgamGr37c RYITVIVVQVHVLNNGGEINRMLRALNSISNAVTLLANRKGVS SKLRFVFGTVRFKGLRV 147  
 AgamGr37e RYLTVLAVLLHSYINQNSVDQLFQSLNEVSSALVTLTNTNHASEGSGYFGTQRFARHLRW 147  
 AgamGr37f GTLVYHLLTMLINFLHRHRLRDLQAFVNIIDRELQQVGVR-----INYRMHRFLITAGMV 143  
 AaegGr28c RYVMSIVVSFFAYNCLSHRMLVKLDQASEIICRMDPLN-----QAPFGTVGSRGRLRM 142  
 AaegGr28b GSFYIFLLAISSYRSFGSFWIMLDKLNQFDEWARQINAP-----VCHRTQKRRLWKAIV 153  
 AaegGr28e GSFYIFLLAIGSYRSFGSFWIMLDKLNQFDEWARQINAP-----VCHRTQKRRLWKAIA 153  
 TcasGr14 KYIDQMAGYTGFLAMLTSMVMFYKRSNDLKTLLS-----NLESIQIYSIKPKERN SN 114  
 TcasGr49 KYIDQMAGYTGFLAMLTSMVMFYKRSNDLKTLLS-----NLESIQIYSIKPKERN SN 158  
 AmelGr4 ETFQALLGSSVILITLLSYCIFQSVIKEIGNYLI-----RIELILHRLQQP--INQK 142  
 AmelGr5 EIFLIILGCFVMTSTLLFYCIFESVIRIGNYLI-----NIENVLRHLQQP--LNRK 142  
 TcasGr16 LFLGTFIGRAKFLAILKQMRNLEPEFLKLDQLG-----ATVRNRRQIRR-----MV 137  
 TcasGr22 MVLNLFSSQMYFTKKLEQWQVHEVDNQLKQMG C-----DLIPNSVVQKH-----LI 58  
 TcasGr17 AVLSSGTTFKLVAKTLENMTKIDKDLTELQKQK-----YLEKRN RHIFRT----SV 133  
 TcasGr150 AVLSSGTTFKLVAKTLENMTKIDKDLTELQKQK-----YLEKRN RHIFRT----SV 133  
 TcasGr32 YVQNIYTVLTA-LTKKPLWFKLLKLNKLV-----QNHNNIREKS 113  
 TcasGr54 YVQNIYTVLTA-LTKKPLWFKLLKLNKLV-----QNHNNIREKS 113  
 TcasGr37 LILNVHTILT-ITKRNQWCKLLENLKL-----RENNSS----102  
 TcasGr53 LILNVHTILT-ITKRNQWCKLLENLKL-----RENNSS----102  
 TcasGr5 LALNISTILT-VRKQQQWALIQNLKVV-----ATTKTK---A 109  
 TcasGr12 WLSNVNSLTLT-LKRKK-WNLLFKTLTHD-----EPRKSS----104  
 TcasGr13 WLSNVNSLTLT-LKRKK-WNLLFKTLTHD-----EPRKSS----178  
 TcasGr104 VALAFQVILNSCFCDPAKWIRLNNNLQYIDEVLK-----NRDSHETNLLRN 134  
 TcasGr45 VALAFQVILNSCFCDPAKWIRLNNNLQYIDEVLK-----NRDSHETNLLRN 134  
 TcasGr98 LMLVSIILGS--LTKKEWAKLNKQYIDEKLN-----TRDQKERNL FKN 132  
 TcasGr52 VMSAVTIILSSLIFNQEQWSSLNKNFQIDKLN-----NRNSKSRVVFYEN 73  
 TcasGr105 VAIPFVGIANS CILNQDKWRLLNNNFQIDKIFK-----TRDDR-VKVYQA 130  
 TcasGr4 SVLLVFLTYFFNILFRKLLNAVKILSKIDETLNSKPLK-----VKIRTKVYLVYC 125  
 TcasGr44 SVLLVFLTYFFNILFRKLLNAVKILSKIDETLNSKPLK-----VKIRTKVYLVYC 129  
 AgamGr9a FFAVFCALPWQTYRHRDRLAALNTLRQNE--LSLIDLT--GSVTDYRVVKKLAVVIVCN 140  
 AgamGr9c LCTVLCSLPLQTFQRDRLAALNTLHQNE--LSLIDLT--GSVTDYRVVKKLVVILSN 138  
 AgamGr9b LCVALCAFWQTFWQRKRLSAAANILAQNE--INLIART--GVRTDYRIVSWLAIIVCN 189  
 AgamGr9d VCVVLCVLPVQTVGRRHQLAYFMNILIKNE--EDLVKLTSGGRSTNYRLVTLATVCLWN 144  
 AgamGr9e FIVAWFVPLVSCARGDRLIYTLNLLNENDTDL SRLHAIQSSVRLSYRQAKWFGRMQYE 139  
 AgamGr9f FCIIWMVPLYAYARCSRLVHALNSLQANDAE LG--HVIT----LSYRRVKCFACFIQLD 134  
 AgamGr9g SCTLCLILPLQCYCKHRQLSSSLNALLKNDSILRQAILEMGKPLCYKEATIFARIMRD 141  
 AgamGr9i TNTIYIILPLQCYCKHHQLANSLNALLINDSILRRLALLVGKEPPCYTEATYFSFIMRD 141  
 AgamGr9h LVLTVLQMVVYGYTRKHVQLELLNSTIDIERELTVLLKR----KINYGVARFTKWLTIW 144  
 AgamGr9j YNLLIFCIIINAVYNRDCFVQLLNSLFARDDWMLSVAMQ----GSSQQR-IASTQSTGGL 176  
 AgamGr9l YALMLVVIWNAFYHRDSFVHLFNSLFKEDWLLQWVVMK----GIVTKLNLQTRHNGSM 167  
 AgamGr9k YTIVPFCVVLNLFYRKRWDLLNVLFA-DDSVLDT-----TNVTMSGAYFLYI 159  
 AgamGr9m FATVPICVVNSFVHRKEIVQLLNLFA-DQNVLDLGGTY----G-NKSVQPF SIANRYV 162  
 AgamGr9n YVSVVMCTILNVLVKQRITRLMNVLFR-PDRILDR CSP-----TNSADARYNDNRKL 134  
 AgamGr10 YVSVVICTILNVFVKQRITRLMNVLFR-PDRILDR CSP-----TNSADARYNDNRKL 134  
 AgamGr11 YVSVVICTILNVFVKQRITRLMNVLFR-PDRILDR CSP-----TNSADARYNDNRKL 134  
 DmelGr23aA LGFALLESVLKQKTHSQLEDLRVQTELQQLRGMFGRSR----HAAYLLPLIGVQFTC 134  
 DmelGr23aB SHAFIVVTSFLDG---FRIKQDQLEPIAFEDSDPWLAFT----VLAMLVPTLGVEYLV 132  
 DmelGr39aA DNAVILTTSVTQLLANLWLRSSQKSQVNLQRLSQVVELL-----QFEPYAVPQFRWLYR 131  
 DmelGr39aB DRLVMVIALGILVQNAWLIWLQAPHLRIVRQIEFYRRNH----LANVRLLLPKRLLWL 132  
 DmelGr39aC ALINIRSCSIVTMLIYTQLYIQRFRFVALLQSILRFNQIS-----GSHREEGRFAFYYYT 135  
 DmelGr39aD EAVIFRSTCVVLFVYVILYAWRHRYRDLVQHILRLNRR C-----ASSCTNQQLHNIIL 134  
 DmelGr98c IVAIATCNQLNILLNYGRGLIYDEIANL DLGIDKSSKNF-----CGKSHWWSFRRLRTL 149  
 DmelGr98d VVAMFVWNQLNILLNFRRLARIYDDIADLEIDLNNASSGF-----VGQRHWWFRFRRLAL 147  
 DmelGr98b YSIMAIANHLNMLINRRLGGIYKDIADLEMDMDEASQCF-----GGQRQRF SFRFRMAL 147  
 AgamGr51 FILIVQIIFIRKKAHLVLLNEMFQLKXVLERMVARSM L--EFRLYRLFVKTAVDIL 169  
 AgamGr52 FMIVVNVMLSKAQLRSLATLNLALAIRNTILQQWNCRVL---SREYQQLLYKVLAIMDA 165  
 DmelGr94a NITVAVINYSQMIISDH-VAKVLSKVPFFDTLKEFRLD---SRSLYISIVLALVKTAVF 144  
 DmelGr97a NVCVLFNYVTQWEKTLQ-IRFQNSVPLFKVLDLSDIS---AMIVVWARIVYGLLKVIFC 163  
 DmelGr93b IILVMQFWFGEELINLVNRFQLFRMQSLTNSPKNRF G---DRAEFLLMFSKVFSLLFV 166  
 DmelGr93c CIIVVQVCYEKELLRMIISFLRLFRVRRLSSLKRIGFG---GKREFFLLLFKFCILVYE 156  
 DmelGr22d GVVSICTVHLRTLWRSKHLEEIYNGMLMLEAKYFC SN-----AVECPAFDGYVIQGVVI 150  
 DmelGr22e SLSMVSIMLLRSFWKSGDIERTLNELEDLQHRFYRNY S----LEECISFDRFVLYKGFVS 151  
 DmelGr22a SLITTLVTHLRTFSRSSELVEILNELLVLDKNHFSKLM---LSECHTFNRYVIEKGLVI 152  
 DmelGr22b NVLSALIVHF MNFWGSRKVGECNELLILEYQDFEGLN---GRNCPNFNCVFIQKCLTI 151  
 DmelGr22c AVFSCVVIHFLNFWGSTRVQDLANELLVLEYQQFASLN---ETKCPKFNSFVIQKWLVS 148

DmelGr22f TFFTISVLLLMNVVKSNTVVRKIANELLTLEGQVKDLLT----LKNCPNFNCVFIKKHVAA 152

DmelGr36a RMASGISAILNRWRQRAQLMRLVECVLRLFLKPKH-----VKQMSRWAILVKFVSGV 137

DmelGr36c RIVTGLFTLILRWYQRCKMMDLASKVVRMYVARPQ-----VRRMSRWGILLTKFIFGS 137

DmelGr36b KIVAGLITVLRNWLQRGQMDLVKDVIRLYMINPQ-----LKSMIRWGILLKAFISF 137

DmelGr59d RVVCFVLELVSRWSQRRTFVRLFNFSFRRLYQRNPD-----IQYCRRSIVSKFFCVT 137

DmelGr59a NYAAIAYTTLISRCYRDAMLMDLQRIVLEVNREMLRTGKK----MNSLLRRMFFLKTFTLT 135

DmelGr59b SFLVILYTVLSRGFRDTAFKEMQPLLLTLFREKRCGFKGIGVRRSLRILLFVKFFTTLS 140

AgamGr26 YSMENGVMVVLIGCHYQRDCYRHYGEQLLAVAVDLSL-CGGTVDFPRIETIFNRVLACI 155

AgamGr27 NVIVNVIVLFAMLECCQSRPFYASILKELFELGKNLHD-CDASINFPHVEAITDRLLVCA 156

AgamGr29 TAIQTSTMGYILLVYQFRFNFRHYFFDRLVGVLEQFGQ-TDINIRLGALQTNIRLLPII 160

AgamGr31 ALLQMGSLSYVLLVYQFRSSFRHYFFDRLVGVLEHFGR-RDIDKSLSALQTNMCRLLIAS 160

AgamGr30 NWLKIVTVLVAVLRSQTSTAYFRETVNSLVQIMVQYDQGWRIERKLASVATVSKRLSVVF 159

AgamGr32a NWLRVVMVLIALVGPRLSGRYFRETIDTLVHIMKLFDRATKIESILTAISVITNRLLLLY 159

TcasGr2 TGVMASLLFLNLAKRWPKFVKDWCVDATFASYGWP-----KGLNKKLNTLTVVFM 145

TcasGr9 TGVMASLLFLNLAKRWPKFVKDWCVDATFASYGWP-----KGLNKKLNTLTVVFM 145

TcasGr7 SGLASGYLYLKLAMKWPRFMKDWCSCVEVMASYGWP-----AGLNRRLNVLLAVFMS 162

TcasGr30 SGLASGYLYLKLAMKWPRFMKDWCSCVEVMASYGWP-----AGLNRRLNVLLAVFMS 162

TcasGr29 SGLASGYLYLKLAMKWPRFMKDWCSCVEVMASYGWP-----AGLNRRLNVLLAVFMS 162

AaegGr64f VIITAMIEFIIILARNWPLIMQRWTADEDFVLSNPY---ETG-QYLPLESLVKRVAFTIIF 118

AaegGr64a3 VIITAMIEFIIILARNWPLIMQRWTADEGVFVLSNPY---ETG-QYLPLESLVKRVAFTIIF 118

AgamGr14 IIVFFMVELMLLARNWSQIMGRWYTDAPFRTPDY---RPPSRTLPPFRKVVHLLAFGVMF 182

AgamGr18 VVYLSAWLFFFIALRWQSILGAFSRCERSFLSDHYRRQSK--GRFALGWKIRFTGFAIFA 153

AaegGr64d FNYIITVFLLLIAIQWQKVLKEFANCERLMLKDAYTKLTERVTRFNLAWRIRMAVIAGIIV 185

AgamGr17 LNLSGAIVLLAIAARWRTIMEKWRSLLENFLHPPY---AERRFWSLKRVAAGSTMVV 143

AaegGr64c LNFSGSVCFLI IATKWRNIMLNWKMYYEVEFLHKKPY----LMK-GRSLKFKVVMVGGGILL 168

DmelGr64c ICIFCFGVFLLSRRWPYIIRRTAECEQIFLEPEY---DCSYGRGYSSRLRLWGVCM 147

DmelGr64d ICIFCFGSFKLSRRWPHI IRETALCERIFLPCY---ANQEGLNFTFRLLRWALILLV 156

AgamGr20 MCTLLQLLFVRLAQAWRGFMVYWAEREEMFFARPYG---AIN---LRRKVI GLAVCILT 174

AaegGr61a VCATSAVLFWALAKEWQFVTVWSETEVERVFLRKPFR---GKA---LRSSIRRTAVSVLT 168

AgamGr21 DACLINVLFLNLATKWRSVAMKWEVDDTFNRPPYH---MQS-WSLRKLRLGVTSFTLVF 196

AaegGr64a DGCINVLFLNLARQWPLMMYWHTEVKDLPQYKTQ---LTK-WKMGHTISMVMLLGM 209

DmelGr64a CVLSAYVVFIRLAKKWPAVVR IWRTRTEIPFTKPPYE---IPK-RNLSRRVQLAALAIIG 191

DmelGr61a VGMVNWLNLFVGFARSWSHIMLPWSSVDILMLFPPYK---RGK-RSLRSKVNVLALS 174

AgamGr15 YNLYAMYRFGRGQRW PALMVKWARVDDSLPPQKGL---FER-AVLAYRIKLC SIMVMA 183

AaegGr1 YNLYGMYCFVRVAQKWVPLMQWFNVEQLLPQSSNI---IER-GKLANKIKLISILVIT 188

DmelGr5a SILIASWQFLNLAQLWPLMRHWAVERRLPGYTCC---LQR-ARPARRLKLVAFVLLV 185

DmelGr64f SVLLLVIVALNLARQWPLMMYWHTEVKDLPQYKTQ---LTK-WKMGHTISMVMLLGM 209

DmelGr64e SIFLISLSFFQLARKWPEIAQSQWLVEAKLPPLKLP---KER-RSLAQHINMITIVATT 202

AmelGr1 TNLIASFLLK LAMRWPCMLMTWEKLEKELSRHRK---ISK-ISLSMKFKIVTIVVMT 129

AmelGr2 NSLVGSILFFSLSSRWVSLQYEW RAMERYIDS--NS---TEP-TRLRWKFFIISTMVLV 217

AgamGr16 LNL L I S I N F A V L A R S W P Q L M S R W V Q L E Q S L P D Q P R L --- S A C R R N A R Q V G L V A T V L L T 158

AaegGr64e I N L S I T I G F T V L A R R W S A M M T E W E N T E Q S L P F R P Q L --- T A S N R R V R R K V I T I M V T L M L 176

TcasGr6 -----NLQFPLLSTLIIIIISLGCLI 138

TcasGr26 -----NLQFPLLSTLIIIIISLGCLI 138

TcasGr33 -----NLQFPLLSTLIIIIISLGCLI 138

AgamGr23 PHFWIPFVGWGVAKQVAIYKTMWGAQVRYRYVTGT---SLQFPHLKLLIVFLSIGCLV 239

AaegGr21a PHFWIPFVGWGVAKHVAVYKTMWGAQVRYRYVTGT---NLQFPHLKLLIVMFSIGCLV 231

TcasGr10 PHFLLPVAAWTNGTEVAKFKNMWTRFQLKYYQVTGT---PIIFHNLTILITYSLCVISWA 187

TcasGr39 PHFLLPVAAWTNGTEVAKFKNMWTRFQLKYYQVTGT---PIIFHNLTILITYSLCVISWA 187

AgamGr22 PHFLLPVASWRNGSEVAKFKNMWTRFQYKYLIVTGK---PIVFPKLYPITWVLCIVSWS 212

AaegGr21b PHFLLPVASWRNGSEVAKFKNMWTDYQYKYLIVTGK---PIVFPKLYPITWVLCIVSWS 212

DmelGr21a TNFLLPVASWRHGPQVAIFKNMWTNYQYKFFKTGTS---PIVFPNLYPLTWSL CVFSWL 213

AgamGr24 P I L I I P - L M W Y E S R K V V S V N G W V D F E T V Y R E T T G R --- A L E L R - L R T K A Q V I A I L L P I 138

AaegGr63a P V L I I P - L M W Y E T R K V S L L N Q W V D F E A I Y R K T A G R --- E L E L S - F R T K A L L I A I L L P V 203

DmelGr63a P I M I I P - I L W Y E A R K I A K L F N D W D D F E V L Y Y Q I S G H --- S L P L K - L R Q K A V Y I A I V L P I 232

TcasGr3 P I I I N P - L V L Y E A R K L A N V V T D W V N F E R I Y K L T K K --- K L S V F - F G N K P V I L T V V L P L 194

DmelOr83b T A W T T I T F F G D S V K M V V D H E T N - S S I P V E I P R L P I K S F Y P W N A S H G M F Y M I S F A F Q I Y Y V 206

AgamOr7 V A W V T I T F F G E S V K T V L D K A T N - E T Y T V D I P R L P I K S W Y P W N A M S G P A Y I F S F I Y Q I Y F L 204

HvirOr2 I S W V T L T F F G E S V R M I T N K E T N - E T L T E V V P R L P L K A W Y P F N A M S G T M Y I V A F A F Q V Y W L 207

TcasOr16 I A W T G I T F V G D S V H N I K D P E N E N L T I T E P I P R L L V K A W Y P W D A M S G M P Y I T L V F Q I Y Y V 306

TcasOr22 I A W T G I T F V G D S V H N I K D P E N E N L T I T E P I P R L L V K A W Y P W D A M S G M P Y I T L V F Q I Y Y V 345

AmelOr2 I S W T T I T F I G D S V K K V I D P V T N E T T Y Y E - I P R L M V R S W Y P Y D P S H G M A H I L T L I F Q F Y W L 204

TcasGr31 E H L L I Q C Y I A V S I F G S S F E A D L R Q F Y K T A Y S A I F T ----- 79

TcasGr35 I V V I L K L I L A K Y R Q Q D V T L L Q I T K A K N L L Y S K Q ----- 90

DmelGr59c R I S A V L L S L I T R W Y Q R S R F I R I W N Q I L A L V R D R P Q V V R G ----- R W Y R R S I I L K F V F C V 139

DmelGr92a S I P N V A V I L C Y H I F R G P E I I D L I N Q F L R L F R Q V S D L F K T K T P G F G G R E L I L I L L N L I S F 151

DmelGr28a G I L A M S T I F G F A M F K R Q R L V S I Q N N I V V D E I F V R L G M K L D Y R R I L L S S F L I S L G M L L F N 154

DmelGr64b V C L L E H L F F W R L A I Q W P R I M R T W H G V E Q L F L R V P Y R F Y G --- E Y R I K R R I Y I V F T I V M S 140

TcasGr71 S C Y T V L A P V L C K R Q Q Y C Q L M S K L L G N H Q L V Y N C H T F G ----- R F L A P N L T Y L L V A L Y S 129

AgamGr19 D V I I I M L L L L R V A Y R W P T V V P K W E Q I E S L E V M Q Y N A R Q Q N A R S C R R I R A I A L L L I V L G F A 140

AaegGr64b FWMFFATVEHCLASSVQVYIQYQESLRNCNWIYSNAMKN----- 115  
 DmelGr93d SIIHLKICHGPEVTKLVNQYLHIFRLGLTDIRRRSQFGGRELFLLLILSVCCQIHEYVFI 155  
 TcasGr34 DFIAYFFNFWTILFSRSDFFQQFECDNKPKLRHY-----LIFIFVNVFFVWVIL 111  
 TcasGr43 NYVVIVVTFYKRRWTWRLKLNLESKAIKKTGR-----YCYYYAFFGVHLYAG 128  
 TcasGr47 NVYQILAYNFWKKKYWSEFLANLKLKGRKIRKN-----LYYLLLVINVLYV 112  
 AmelGr3 VMSLTVVCIVGSPFRWKYLQVLVINKLIEVDEKIGVSSAKVARRFTIVLTICLSYLWFNS 163  
 AgamGr32b SILQTLTGNMMIGCEQRRAEYEGYFEEVLHLMKETAHQPDCCTTIWYRHVTKVLLALYC 159  
 AgamGr50 MYVVTLTSLRKLTLANRERLCQLLNALLVLRQVLQGSTKAATFQQGLARSLLTKLIVFDL 145  
 TcasGr20 VAVTVLAGILTTPFKLPYFWKMLTGFQKIEQVLPHPHAPPEEKRSFWAVTIFVLVAASVI 152  
 TcasGr79 SVIYSLLRVKRMMRSWYLLTNLTYNNTNRKYWLN-----VCCLNLSIVTIFNF 131  
 TcasGr15 AYHVFVTMMTLKRHKWSTLFEILLKLESKDLRSRTFYG-----FVIVAHLLFLVIFVNI 133  
 TcasGr60 KIKRMVLLHKTIVRVAKSLNQVFAPQLLLWVLLG-----VMVVTVDLHVFFFTLFN 127  
 AgamGr38 CYASTIYGLISCFINRHDWKFYNEAYAVDNMLEELG-----ERTNFTRSFALFVAYY 152  
 TcasGr51 TSVVKSLESRYADLNENFLQCQDEKFEFVYHRILGETVDLFNLSLFGYQTLITFHIGS 384  
 DmelGr39b VIIQVMVHYDDYFRFCREMKYGLRLQCELKIHVG-----RLKWQSYAKILALGIGF 130  
 AgamGr28 NLCITVQTMLRGYSETVRYSQLERIVTVAATVSSSE-----WTELLYLRLRLYWFGI 145  
 TcasGr61 SFLMHQGETQFVAANVILKTRFKTINNILENLWAKKLIVVKDKKRSDEQITIDICMRC 238  
 TcasGr50 GITIQTGLISNCINAKQITIFFDKIQRIDKQFGLLGSINYYRISIFVNLAILGVGF 137  
 AgamGr12 LPVTIVYMHLLIAFTKRVRI TALFNALFTDRSWRFFGDRSWSWYESSRWLGRFATAITIGT 143  
 AgamGr36 GAIVMIVLAIDNFMRRDATCQIIGELFKVDYLRQIRGHQLDHRQYVTLVRLVILFVLMLI 150  
 AgamGr48 RYGTVVLCFYQLLRHEVSLHRVQRFVVIKSVIVRCNSRSYASVQRMVYALVAKMLIAD 145  
 AgamGr49a IYPCAYIVLLTDHEFPILALSYYIIMLQFTLNYYIVGVLYLHVLFDPAPLLHVLNELIER 162  
 AgamGr49b LALIYYHLLPARPVIRNIFNGFVQLFRTLNGAGCHRWKGKSTKKNVLLKALKMLICDITLL 149  
 DmelGr2a MRVAHLAALLEALWQRQAQGFFAELGEIDRLLSKALRVDVEAMRINMRRQTSRRAVWIL 154  
 DmelGr32a CILTYTLTVFVCAHNTTSMRLIMNEILQLDEEVRRQFGANLSQNFGLVKFLVGITACQA 196  
 DmelGr68a CII SYTMVVLSSVQNASRHFRTLHDIAKIDEYLLANGFRETYSCRNLITLVTSAAGVLA 147  
 AmelGr7 IITRIKAQQLRTIVSLVELSDQKMNIGLSPKHRCLMMYQIKRYIFLGIYTLFVVLIIYH 151  
 AmelGr8 IALFGPAVFCISYASNRSTLQAIQRVQHVSHALSTEIFSKLIKTLIKDMSFFMPLGTFI 159  
 AmelGr9 GIITMHILSSTRLCMIQNLLKISSILSEKDFNDLAKR-----IHKKDILGFLFLIH 151  
 TcasGr57 NVSLRIILVFSKGVKISFFNQGYLEKQEIFNCCSKSFRMNFIFNLVLLLLFVDAY 133  
 TcasGr41 TSTSILLIVNAVVFVEKIRIRTLIKLSEIKENTRLAEK-----QARISIBELVAVHLV 139  
 AgamGr34 AILLMPAFRLRNFAEVTRALRKLEQDLQDAIPTNCRQMARWNIIGIVVGTVTVLLLATAF 148  
 AgamGr35 AWVVPQLKADELGSILDGFLLDRELSSYNVHEVAGYKRVSLFLRYGVVLLALMSLTVYD 177  
 AgamGr39 QLIALIGIPIITNYVQAYKYDRLIYCIAEVDKGLEELGFKHDYVSEYFYSTVYLSVTLGLQ 149  
 AgamGr40 GIIISLSISLGNFRVVGMRMFKTLDGVDQILKRDGRLNHQLNHLSCIYMAVPILVN 144  
 AaegGr28d VFLFSLFMAPKYRLRTQGMFEILANIAELDGLRSLGLHIDHQRHFFISTVSAGLWMTMG 147  
 AgamGr42 TLILYLLAGFNCSVSATLVLRLHVALHVMVQLVEEADFLFSKYFYEIQHSHHLLVCFVALL 163  
 AgamGr41 PFAMMLFVPWIFLFRKTKIFYISRDLDFDALVNETFLCFVRTSCFLFSAIFLFLQIAK 160  
 AgamGr43 GVLATIICYASLWRTDRMKCIYIEGIQGSNVKINDRYQFRNMQIPIKYSILVPSIGML 153  
 DmelGr33a VKHSVAYHFTWFLFCVFTFALYYDVRSLYLTFGNLAFIPFMVSSFPYLAGSIQGEFIY 185  
 AgamGr44 VLQTFLSAVVRRYHKRYEIAQLMRDLFQKRELFSAATELSQRWIKGHILRKTITISQLIVT 148  
 AgamGr13 CVLIAVQQLLFLETYRQLLTDLLAGVRLARRTTVALGEQVQLLVQLVLLPCATYTLHVS 144  
 AgamGr45 GCILVLGIVMVSILVRQPAFSLRILQVLLSVDRAIPEMVRTAGLSAITKVVNNIIVLNRNL 182  
 AgamGr46 NFVSVIVIDVNYRYSGLIFLFRKVALANHRSLTAIVLGVLLLDEQIADRLSVPKHGQW 164  
 Dmelr93a VSILAVISFVIQARGENQFREVLRNRYLALYQRICLTTRLRHLFPKTFVVFLLKFFFTLC 159  
 AmelGr6 NYLVAMHDLIFTIFTRKTFSRIWNAQQDFDERLSQLGYPRKETKIKIAAWILLASQIWIW 199  
 AmelGr10 CLFTDASVTTLWNWKIRSVLSQLRNFDRATKFRDFSKG-----NKLRIICHVTMFVSFS 135  
 TcasGr28 AFVMGLFCILKFALDGLMLDKTGICVSNVDFVH----- 111  
 TcasGr40 HSFMTSVLFSQVASRWPLFLNEWTKIEINLLKHYQS-----TTDLHKKIRYSAFGMIF 153  
 AgamGr3 GLLTIFVTVADSWEFEVETHRSIWLRYRALATRNGLTILGLIGRDELARVLLRYFFAILTIV 153  
 AgamGr4 LTLVSFAIFIDTVLQRNTHRLVWEKIALIRLSARKVYVERFTRHYLWKFYGYLAVCAFLE 177  
 AgamGr6 PLAVPLVTLTSLKLRSTQKRIALLMQIDGSEIAHGAAPGCLERFNHQLADDIFSTMFV 173  
 AgamGr7 TDRAASSLARARTHFRNKLLLFCAFCCAIELGILALVSDPVQLALWCLTPVSLVIIRLK 168  
 AgamGr47 MNISLLALINEYIYFTVHIRRFLMIVNRLKQLLLGDTNESNETVLLDQNRKSKTPTIAY 163  
 DmelGr8a GVLAIYLETLLSSQRHLANFWLHFKLGGQKTGLVSLRSEFQQFCRYLIFLYAMMAEVAI 145  
 AgamGr5 IGLSILVMYVELFRTSDNICGWLELLYKAHQTLQRYGMVDHRRRLTRVMRLYVWFVLSGL 189  
 AgamGr8 MVFTYYSFLFESGYQRGVLYKVDLELERLHNIFFPSAKWALQPAHLRTVALFVYMSWWE 134  
 DmelGr9a YKMIHAWIALSALFECRRFRYLLLEELPPVKATS-----FIYRHLILEIILFA 122  
 DmelGr59f YVVHIFSIMLLTWQCRNWAPKLMNTNIVTSDLNRAYTIDCNRTRKFRIRLQLFLVGFACLA 167  
 DmelGr77a LLVCAFMTLWIFHCFKQAEIIGCLNRLKCRRLRRLMHTRKLDKSDMDCLATKGHLEVVV 174  
 DmelGr85a VFFALLSSMGSCYQWQNRILAVLKEKHKQRDLRSHMGYRVPVRSKQNSIDYLLFALTVLLI 162  
 TcasGr27 FTNIVNLTHLLETQYAKIRFENKQKIFDESIVIFER-----KVMKNFAILLIPTCV 134  
 TcasGr48 IITILDIEILGYVNKAKFGKLLINLYTINYNFKESE-----RNDYQLLQVVFVFCY 149  
 AgamGr1 VAIAFNVICTIRIAWPASQHSALQCAQLIAKVQEQIIMFQCSIESKRPFQLFWLWIAVL 151  
 DmelGr10a TAIKYATVIVTYVANTVHFEAINQRCTMQRTHLEFEFKNAPQEPKRPFEFFMYFKFCLIN 154  
 DmelGr59e LVYYAVLNRPLAHGAELQIERIITGLKKGAKRLVYKRHGQRTLHLMATTLVHGLCVLVD 139  
 DmelGr10b QLLMAVTGTWHLFLFERHVCQTYNELSRILKHDLKLLK-----EHSRFYCLAFKAV 139  
 DmelGr89a DVCISLALLGNHLWNRRELANLVNDLARLHRRRRLS-----WWSTLFLWLKLLLSL 137  
 DmelGr57a STLVFGVTVISLQVFAARRHLGIYQRLAALDARLMSDFGANLNYRKMLRKNIAVLGIVTTI 154  
 DmelGr47b CSVTYIEYCLSLDLQKDRHLKLVARMQEFDRSVLMVFPVHVQWNYRRARLKYWYGTIVVGF 152

|            |                                                              |     |
|------------|--------------------------------------------------------------|-----|
| DmelGr58a  | RIMAMFSGVLLMWFRRKRILNLGENLILHCLKCKTLDNRSKKYSKLRKVRNVLFQMLLV  | 139 |
| DmelGr58b  | RAIAVVSCTGLWLRKHKIIQLYKYSLIYWKRFGHITRAIVDKKELLDQESLARIMIRK   | 149 |
| DmelGr98a  | GHAIVLELLWGNCSKDVRQLQAIHSQIKLQLGTSNSTDRVRRYCNWIIYGSILIRWLIF  | 143 |
| AaegGr93a  | NLLVTAVIYWRQFMCNERIQLLNRNFIRFADEHMCSTAIKCCQLWYQTVLLAYLMVSNAG | 152 |
| TcasGr19   | IIFTVHFLLCITYFYFYAFIILLCVYFYFYAFIIFTVHLLFLLCIYFVVPFLFLLCIYFY | 149 |
| DmelGr47a  | IGGTMACCVKSCWEKAQGIRNLARGLVTMEQKYFAGRPSGLLLKCRYIKITFGSITLLR  | 133 |
| DmelGr58c  | KLLTMLFLMSSVWIQRRLYKLGNDLMKMLHKFRFNLGNDRCNRCLCKGLLTSRFLVLT   | 143 |
|            |                                                              |     |
| TcasGr38   | LCYLLARY-----VALALVILFSEILV                                  | 173 |
| TcasGr46   | LCYLLARY-----VALALVILFSEILV                                  | 155 |
| TcasGr1    | RIHLFVRY-----VFTSYLLFDYFVQ                                   | 154 |
| TcasGr123  | MVQSLGRV-----GVLVVIIGTLAIIA                                  | 155 |
| TcasGr62   | MVQSLGRV-----GVLVVIIGTLAIIA                                  | 430 |
| TcasGr25   | ----QVEI-----IHNEILVTHNEIQT                                  | 61  |
| TcasGr59   | ----QVEI-----IHNEILVTHNEIQT                                  | 236 |
| AgamGr2    | IAEIPLDY-----LEKEIFTVYTQRRK                                  | 161 |
| AaegGr66a  | KNDIPMNY-----LEKEIFTIRSHKRG                                  | 249 |
| DmelGr66a  | LDSSQPPQ-----YDSNLEYLYKELGG                                  | 259 |
| TcasGr11   | FSLLAR-----VPVMLMTISADFIQ                                    | 174 |
| TcasGr55   | FSLLAR-----VPVMLMTISADFIQ                                    | 174 |
| TcasGr21   | VTIVAT-----LTVTIIFFASYQYG                                    | 171 |
| TcasGr56   | VTIVAT-----LTVTIIFFASYQYG                                    | 171 |
| AaegGr     | TVNLAY-----ITISIAIVTSSGVF                                    | 175 |
| AaegGr28a  | IVLFSY-----FATTMSIVLISGFP                                    | 71  |
| AgamGr33   | IISTLY-----LVVCLAVFISSDTY                                    | 173 |
| DmelGr28bB | LILGVY-----FVGVFRLLVSLDVT                                    | 175 |
| DmelGr28bC | LVNVLF-----TGGTFSVLYSSEVA                                    | 202 |
| DmelGr28bD | GVQLGY-----LISSNWMLLGNDRV                                    | 172 |
| DmelGr28bA | LLDVTVL-----LTTGLVCLAKMEVY                                   | 184 |
| DmelGr28bE | GSMVAY-----ITCSFLMISLRDVT                                    | 178 |
| AgamGr25   | ITGALA-----LDIWVWYRIADKIK                                    | 167 |
| AaegGr43a  | ITGALA-----LDIWVWYRIAEKIK                                    | 166 |
| DmelGr43a  | ISILVG-----LDVGTWMR IAQDMN                                   | 162 |
| AgamGr37b  | IVLG-----SFLFLLLVTIISTVT                                     | 161 |
| AgamGr37d  | GIVT-----SYMLLLAIHLPLIL                                      | 157 |
| AgamGr37a  | LIAI-----VLLIYIYGTIITCQ                                      | 171 |
| AgamGr37c  | FSLS-----YPFVCLAITFTILK                                      | 165 |
| AgamGr37e  | LMLV-----YPLMFVSMTGFVER                                      | 165 |
| AgamGr37f  | CFLSGIFV-----TSALVYAYKITVLN                                  | 165 |
| AaegGr28c  | VLIVSIVS-----PLIGSMVMNKYMHV                                  | 164 |
| AaegGr28b  | VIIIL-----LLTFVVIISTGFLVS                                    | 171 |
| AaegGr28e  | VIIIL-----LLTFVVIISTGFLVS                                    | 171 |
| TcasGr14   | HWVRSGLF-----ALITGNVLFYFPFLP                                 | 136 |
| TcasGr49   | HWVRSGLF-----ALITGNVLFYFPFLP                                 | 180 |
| AmelGr4    | YIFNLLFF-----VCLFKFIIFVALLF                                  | 164 |
| AmelGr5    | HIFNVLFF-----ICLFMLILLIILLI                                  | 164 |
| TcasGr16   | VFLIGVSL-----SFNLFGDLLTLFIK                                  | 159 |
| TcasGr22   | LLMVLVNL-----IFNTCGEVFSAWVR                                  | 80  |
| TcasGr17   | LLIFVMHL-----MFDTLGGLYSTWSK                                  | 155 |
| TcasGr150  | LLIFVMHL-----MFDTLGGLYSTWSK                                  | 155 |
| TcasGr32   | HYCLFVAS-----NCFWWSYQSYMSYI                                  | 135 |
| TcasGr54   | HYCLFVAS-----NCFWWSYQSYMSYI                                  | 135 |
| TcasGr37   | ----FVVA-----NVLFQLIHVYTTVV                                  | 120 |
| TcasGr53   | ----FVVA-----NVLFQLIHVYTTVV                                  | 120 |
| TcasGr5    | WFLPFVVT-----NIIFVLPHTYEAFV                                  | 131 |
| TcasGr12   | -LVQLILT-----QAIFLMFVSYNIYV                                  | 125 |
| TcasGr13   | -LVQLILT-----QAIFLMFVSYNIYV                                  | 199 |
| TcasGr104  | VSVQFFVY-----VILYILATVFLAYV                                  | 156 |
| TcasGr45   | VSVQFFVY-----VILYILATVFLAYV                                  | 156 |
| TcasGr98   | AYFQLVLS-----ISVYSSSVGYTQYV                                  | 154 |
| TcasGr52   | VNFQFGSI-----LALFGVVQIYIFSG                                  | 95  |
| TcasGr105  | PVLQFLY-----IFTYLSVTCYVTYA                                   | 152 |
| TcasGr4    | SSALVLAA-----MTTFHLYEAHGFS                                   | 147 |
| TcasGr44   | SSALVLAA-----MTTFHLYEAHGFS                                   | 151 |
| AgamGr9a   | TVCFHIIIF-----QVYIITKTHSPDEL                                 | 162 |
| AgamGr9c   | GVIFHVFF-----HAYYIKNKTSPTY                                   | 160 |
| AgamGr9b   | GMCLHLFF-----QVYIIVQYGGMGKP                                  | 211 |
| AgamGr9d   | GLLFHVFF-----HFYIIDEFRHFGR                                   | 166 |
| AgamGr9e   | SIACLLL-----SAGYTILYSFQP-E                                   | 160 |

|            |                                                               |     |
|------------|---------------------------------------------------------------|-----|
| AgamGr9f   | GVLCCLLL-----STGYTIAFWYQG-Q                                   | 155 |
| AgamGr9g   | GIVCVSFF-----FCSYFIKSWSKC-N                                   | 162 |
| AgamGr9i   | GIACVSFF-----FCSYFMKNWVID-E                                   | 162 |
| AgamGr9h   | TIFFYVII-----MHTLYVFDHLRYNT                                   | 166 |
| AgamGr9j   | VCLIVLVL-----LYAMYNALFVNDHS                                   | 198 |
| AgamGr9l   | GTLALLVI-----LNSFYNFAYAANST                                   | 189 |
| AgamGr9k   | SVLSILLV-----TLELCNLFALETLS                                   | 181 |
| AgamGr9m   | KVLYAIVA-----LICFYNYINMIHTM                                   | 184 |
| AgamGr9n   | LVFVLFIL-----FGMCMKLSYKKEVE                                   | 156 |
| AgamGr10   | LAFALFIL-----FGIFIKLFHLKTAE                                   | 156 |
| AgamGr11   | AGLLFAML-----TMMSINMFYHRDMN                                   | 153 |
| DmelGr23aA | DLVRLATN-----FGETVSPVFCISLP                                   | 156 |
| DmelGr23aB | CSN--APE-----YAFRIRIYHLKTLT                                   | 152 |
| DmelGr39aA | IWLLVCLI-----YGAMVTHFGINWLT                                   | 153 |
| DmelGr39aB | I IATNVVY-----MANFIKTCIFEWLT                                  | 154 |
| DmelGr39aC | HLSLLIIC-----MLNYAYGYWTAGVR                                   | 157 |
| DmelGr39aD | YGMLTILC-----FGNYLHGYSTRAGLA                                  | 156 |
| DmelGr98c  | SIGLWMVI-----IIGVIPRLTLGRAG                                   | 171 |
| DmelGr98d  | SVGLWIVL-----LVGLTPRFTLVALG                                   | 169 |
| DmelGr98b  | CVGVWMIL-----MVGSMPLTMTAMG                                    | 169 |
| AgamGr51   | MQLLALYT-----FEDSTYTRVDSVG                                    | 191 |
| AgamGr52   | LLLFSLIM-----YYVTQDEVPTG-AE                                   | 186 |
| DmelGr94a  | PLTIEVAF-----ILQRR--QHPMS                                     | 164 |
| DmelGr97a  | PLITYITL-----ILYHRRSISESQWT                                   | 185 |
| DmelGr93b  | FM---AF-----RLMLSP-----WF                                     | 178 |
| DmelGr93c  | LYSEICQL-----WHLPDS-----LS                                    | 172 |
| DmelGr22d  | VVGLLAPW-----MVHFGMPD--SKLP                                   | 170 |
| DmelGr22e  | VLELVSM-----VLELGMSPNYSAQF                                    | 173 |
| DmelGr22a  | ILEIGSSL-----VLYFGIPN--SKIV                                   | 172 |
| DmelGr22b  | LGQLLSFF-----TLNFALPG--LEFH                                   | 171 |
| DmelGr22c  | IGLLLSYL-----SIAYGLPG--NNFS                                   | 168 |
| DmelGr22f  | IGQFVISI-----YFCLCQE--NSYP                                    | 171 |
| DmelGr36a  | VSNFLQMA-----ISMESLD-RLGFNE                                   | 158 |
| DmelGr36c  | ITDGLQMA-----MVL SAMG-SVDSQF                                  | 158 |
| DmelGr36b  | AIELLQVT-----LSVDALD-RQGTAE                                   | 158 |
| DmelGr59d  | MTETLHII-----VTLAMMRNRSIAL                                    | 159 |
| DmelGr59a  | YSCLSYIL-----AVFIYQWKAQNSWN                                   | 157 |
| DmelGr59b  | WLCVTDVL-----FLLYSTDALIWN                                     | 161 |
| AgamGr26   | ALFFAGVL-----TVDLLYNDLVVWRF                                   | 177 |
| AgamGr27   | VLYFSTSS-----LVDWWADYDPSCTF                                   | 178 |
| AgamGr29   | PLHIALVL-----AAYILHDQS--WGV                                   | 180 |
| AgamGr31   | LVFVTLVF-----SALVVRDHS--WSN                                   | 180 |
| AgamGr30   | LLDDFTIA-----TGLYFIVEG--APA                                   | 179 |
| AgamGr32a  | GLHALIIT-----VTVWISTEH--PVS                                   | 179 |
| TcasGr2    | I ALGEHWLSRYSWAKVFLVEHILVQTNKLVLALECNNTTA-EGFTYFLGNMSFAHIFALV | 204 |
| TcasGr9    | I ALGEHWLSRYSWAKVFLVEHILVQTNKLVLALECNNTTA-EGFTYFLGNMSFAHIFALV | 204 |
| TcasGr7    | LAL-----IEYILMQTNKLVLALECNNTS-EGFDYFFGKMSYSHIFSLM             | 206 |
| TcasGr30   | LAL-----IEYILMQTNKLVLALECNNTS-EGFDYFFGKMSYSHIFSLM             | 206 |
| TcasGr29   | LAL-----IEYILMQTNKLVLALECNNTS-EGFDYFFGKMSYSHIFSLM             | 206 |
| AaegGr64f  | FAFVED-----TINFISAYLLNVVHMKYCT-HAT--DFWRNFFRREHAYIVRFI        | 164 |
| AaegGr64a3 | FAFVED-----TINFISAYLLNVVHMKYCT-HAT--DFWRNFFRREHAYIVRFI        | 164 |
| AgamGr14   | LAFVED-----TLNFVSAYRLNELHIRYCP-HTA--GFWKNFFHREHPYVLRVI        | 228 |
| AgamGr18   | LALVED-----WLNYSAYQSNIVQIATCNRTNV--TVWQNFYLRHHPVFWHL          | 200 |
| AaegGr64d  | LAFVED-----FLNFYSAYQDNVQMDYCNRTI--SFWENFYIRDHPQVVFQYV         | 232 |
| AgamGr17   | LAFVED-----TLHVASVYYTNLQYFKRCD-NST--PFWTLFYQREHPKFFHYL        | 189 |
| AaegGr64c  | LAFVED-----LLHMLSCCRTIEVYIERCD-NSS--SFWETFYTREHKSFTDYI        | 214 |
| DmelGr64c  | AALCEH-----STYVGSALYNNHLAIVECK-LDA--NFWQNYFQRERQQLFLIM        | 193 |
| DmelGr64d  | AALCEH-----LTYVGSAAWSNYVQIRDCN-LKV--GFVENYFLRERQELFSVF        | 202 |
| AgamGr20   | SALVEH-----VVYVINQAYNVYQESLTCQYNVT--NPLKLYGTLTFGSVYQSV        | 221 |
| AaegGr61a  | LALAEH-----IFSVANNIANLRREVHHCNWTIS--SPVKYFCLKTFSSTFDSI        | 215 |
| AgamGr21   | LAAVEH-----ILSIVSNVHNQMVIEKYCNWTE--PNYFQHYSLRRFANIYLN         | 243 |
| AaegGr64a  | LACCEH-----LLATINNLNDQWHEIEHCGWKENITDTRHFSLRKFSNMYSIV         | 125 |
| DmelGr64a  | LALGEH-----ALYQVSAILSYTRRIQMCANITT-VPSFNMYMQTNVDYVFFQL        | 239 |
| DmelGr61a  | LAVGDH-----MLYASGYCSYSMHILQCHTNHS-RITFGLYLEKEFSDIMFIM         | 222 |
| AgamGr15   | LALSEH-----LLSIVA--AVHYSNNCPAVHD--PYEAFFKSNFAFVYFYF           | 225 |
| AaegGr1    | LALMEH-----MLSIVA--AVYYTPNCPNIKD--PVKMFFKSNFLVYVYFYF          | 230 |
| DmelGr5a   | VSLMEH-----LLSIIIS--VYYD-FCPRSD--PVESYLLGASQLFEVF             | 226 |
| DmelGr64f  | LSFAEH-----ILSMVS--AINYASFNRTAD--PIQNYFLRTNDEIFFVT            | 251 |
| DmelGr64e  | CSLVEH-----IMSMLS--MGYYVNSCPWPDR--PIDSFYLSFSSVYFYFV           | 245 |
| AmelGr1    | FALVEH-----SLSIIH--GYFKAKECIEFHRE-QSILGVYFQMQFPQIFSRT         | 174 |

|           |                                                              |     |
|-----------|--------------------------------------------------------------|-----|
| AmelGr2   | LSLIEH-----VLSIFNNIDGYEWNESNSTFHN---FLEIYTLRSHSFIFDTL        | 262 |
| AgamGr16  | SGLIEH-----VLSKPA---GLHRAYRCPIPN---LLEAHYKQAFPEMFSFV         | 199 |
| AaegGr64e | SALFEH-----ALAKPS---GLYRAYKCGIKD---LLEAHLMQAFPEMFSFI         | 217 |
| TCasGr6   | LA-----VFLLTLSALLEGFT                                        | 155 |
| TcasGr26  | LA-----VFLLTLSALLEGFT                                        | 155 |
| TcasGr33  | LA-----VFLLTLSALLEGFT                                        | 155 |
| AgamGr23  | CA-----IVFLLSLSFLLLEGFA                                      | 256 |
| AaegGr21a | CA-----IVFLLSLSFLLLEGFA                                      | 248 |
| TcasGr10  | VG-----IGIMLAQYYLQADML                                       | 204 |
| TcasGr39  | VG-----IGIMLAQYYLQADML                                       | 204 |
| AgamGr22  | LS-----LVIIISQYYLQPDFQ                                       | 229 |
| AaegGr21b | VS-----FVIIMSQYYLQPDFQ                                       | 229 |
| DmelGr21a | LS-----IAINLSQYFLQPDFR                                       | 230 |
| AgamGr24  | LC-----SLSVAITHVTMVDFK                                       | 155 |
| AaegGr63a | LS-----CLAVIITHVTMVEFQ                                       | 220 |
| DmelGr63a | LS-----VLSVVITHVTMSDLN                                       | 249 |
| TcasGr3   | LA-----CGVMVVTHTITMAHF                                       | 211 |
| DmelOr83b | LFSMIHSN---LCDVMFCSWLIFACEQLQHLKGMKPLMELSASLDTYRPNSAALFRSL   | 262 |
| AgamOr7   | LFSMVQSN---LADVMFCSWLLLACEQLQHLKGMRSLMELSASLDTYRPNSSQLFRAI   | 260 |
| HvirOr2   | LFSMAIAN---LMDVMFCSWLIFACEQLQHLKAIMKPLMELSASLDTYRPNATAELFRAS | 263 |
| TcasOr16  | FFSLAHAN---LLDSLFCSWLIFACEQLQHLKEIMKPLMELSATLDTYVPKSADLFRAP  | 362 |
| TcasOr22  | FFSLAHAN---LLDSLFCSWLIFACEQLQHLKEIMKPLMELSATLDTYVPKSADLFRAP  | 401 |
| AmelOr2   | IFCMADAN---LLDVLFCSWLLFACEQIQHLKNIMKPLMEFSATLDTVVPSNGELFKAG  | 260 |
| TcasGr31  | -----VIDFSLCKAILVH                                           | 92  |
| TcasGr35  | -----IVTILKTKSNIFI                                           | 104 |
| DmelGr59c | LSDSLHTIS---DVSAQRKRITADL                                    | 161 |
| DmelGr92a | AHEQTYLW-----FTIRKGFWRFLID                                   | 173 |
| DmelGr28a | VIYLCVSY-----LLVSATISPSFVTF                                  | 178 |
| DmelGr64b | SALVEHCLLLG---NSFHLSNMERTQCKINVTYFESIYKWERPHLYML             | 186 |
| TcasGr71  | GYVWT-----DILFGYFREYLEA                                      | 148 |
| AgamGr19  | EHMSIG-----KTVNARVYEARTCHWNYSNLPEYY                          | 171 |
| AaegGr64b | -----YAHRYAYIFNWM                                            | 128 |
| DmelGr93d | LVIASRLCG-----FQHIIWVSYTYVF                                  | 178 |
| TcasGr34  | MSNYAFTR-----IILLKSLEIIVIID                                  | 133 |
| TcasGr43  | VVIIYS-----ICVQTEKSVDFLC                                     | 148 |
| TcasGr47  | LTLCY-----AVYYWRQYEDFWH                                      | 131 |
| AmelGr3   | IIDFYTN-----RKTVDNKAMTGKGPIN                                 | 188 |
| AgamGr32b | IASLTVPIV-----MTTILWDIATIPYVM                                | 183 |
| AgamGr50  | GMMVLS-----AAFFRTFIELKQSL                                    | 165 |
| TcasGr20  | FFDVVVWG-----LSASDLGVFFKRFL                                  | 174 |
| TcasGr79  | ATKKLEQF-----IVRFMKYHFFGTLK                                  | 153 |
| TcasGr15  | WCWIVEIGG---WLAFTKQLLIKFEV                                   | 156 |
| TcasGr60  | KLLGQYP-----VGIVGVKNASLFI                                    | 147 |
| AgamGr38  | GTAIG-----MCVLVIAVMYSEN                                      | 171 |
| TcasGr51  | QLVLHTVKTVLKTMTSTFSDITFMRTVWKFNFIFLITPFYFNENTIHSKLCCKLYATFLI | 444 |
| DmelGr39b | LVTVLP-----SIYVALSGSLLYFWS                                   | 151 |
| AgamGr28  | FFTLTSGVG-----LAVAHLPFGGIWST                                 | 168 |
| TcasGr61  | HDQLCDMCGAINMLFGFPPIIGCLIQFNITVFSFCYCYNSKMTKDGVYNTLFFIVYVSL  | 298 |
| TcasGr50  | VLVFPDY-----VFFVENEPIYLIF                                    | 159 |
| AgamGr12  | MLYLS-----LLILSQYNSSTKFP                                     | 162 |
| AgamGr36  | ATGTVFALG-----MSTISEFSIRNHLI                                 | 173 |
| AgamGr48  | VGLCTLFAMN---SGIKRHETSAHVYR                                  | 169 |
| AgamGr49a | TRALLRHIDP-----PAGEVGRRLFFK                                  | 186 |
| AgamGr49b | CALFVLYFG-----QFFIQDGDIIQSQILW                               | 173 |
| DmelGr2a  | WGYAVSQLLILG---AKLLSRGDRFPYIWS                               | 182 |
| DmelGr32a | YIIVLKIY-----AVQGEITPTSILLA                                  | 219 |
| DmelGr68a | VAFYIHYR-----SGIGAKRQIILLI                                   | 170 |
| AmelGr7   | CHYESTTP-----ALIKLCLSILPNIP                                  | 173 |
| AmelGr8   | LYMIVNYD-----FCVFLFCWYSFFG                                   | 181 |
| AmelGr9   | LPNCSKSD-----IHVTLRNVTHLYIL                                  | 173 |
| TcasGr57  | LWISSVGR-----MFQYYIGRSFTYYVC                                 | 157 |
| TcasGr41  | LAFLYS-----FDLFANGITFGWHT                                    | 159 |
| AgamGr34  | DCYVTVFR-----GFIRVDYWIITILP                                  | 170 |
| AgamGr35  | GFVSFVQLT-----TVEVWYWLSSHQLPFI                               | 201 |
| AgamGr39  | LSCLTGTAFTN---PFLVDYDTWCNFTALVGFI                            | 179 |
| AgamGr40  | FFLMISTF-----FIVQDQSSQOFTAT                                  | 166 |
| AaegGr28d | LFVLIITGTN-----RTNEDWLDLSEMFDPWIS                            | 175 |
| AgamGr42  | LGSFACQG-----LLILNDYTAGKMLV                                  | 185 |
| AgamGr41  | YNYPAN-----YQFFHMFSTLFATA                                    | 180 |
| AgamGr43  | IILSVCEAYADHG-----YYFTIITIVYPLWMMFH                          | 182 |

|           |                                   |     |
|-----------|-----------------------------------|-----|
| DmelGr33a | HVSVISQR-----FEQINMLLEKINQEARH    | 210 |
| AgamGr44  | SSFVLA VL-----AVLDAGEETAIGSE      | 170 |
| AgamGr13  | VYITLIEWAEIS-----IVQAVLFMVSLIPNIA | 172 |
| AgamGr45  | LMLILGVG-----VKAVLEVFNCLMYI       | 204 |
| AgamGr46  | CRFICLHMT-----FVFLCIGFAEWYNCI     | 188 |
| Dmelr93a  | GCFHEIIP-----LFENSHFDDISQMV       | 181 |
| AmelGr6   | TAVNQS-----GMFAFEETWTFNVS         | 219 |
| AmelGr10  | YWAIVG-----YFTYRIEAKVPIFH         | 155 |
| TcasGr28  | -----FYYPVATMSFYVLN               | 125 |
| TcasGr40  | VALLEHCFS-----MLNYVYSSKCENNS      | 176 |
| AgamGr3   | AVCALVEF-----TIYNQLTPGTQWH        | 174 |
| AgamGr4   | AQVLYLAWD-----DPSALAYLWVIMILH     | 201 |
| AgamGr6   | FNVIPAVS-----EFFIISRISGNPVW       | 195 |
| AgamGr7   | HLHHAYHIDR-----LTARFDILREQLES     | 192 |
| AgamGr47  | DEIFTVYG-----RGAGGPRGRKIGDA       | 185 |
| DmelGr8a  | HLGLWQFQ-----ALTQHMLLFWSTYE       | 167 |
| AgamGr5   | YFVVNESY-----LYLCAEQMQTKRFY       | 211 |
| AgamGr8   | LTYAYWIT-----KSARSSNFTILFWVL      | 157 |
| DmelGr9a  | CN-----AFLVLSEYTIRGIY             | 138 |
| DmelGr59f | IFFN-----IWKHFVVYRSIL             | 184 |
| DmelGr77a | LLSSYLLSMAQP-----IQILKDDPEVRRNF   | 200 |
| DmelGr85a | LRLSIHLAT-----FTLSARMGFNHPNC      | 185 |
| TcasGr27  | AMFIVP-----YFQDRREMP LIV          | 152 |
| TcasGr48  | FIYLFY-----VYIYYSVHEAS            | 167 |
| AgamGr1   | SAAYGFLLT-----FMVLTSKVLFVSQT      | 174 |
| DmelGr10a | LMMMIQVCG-----IFAQYGEVKGKSVS      | 177 |
| DmelGr59e | VVNYDFEFWT-----TWSSNSVYNLPGLM     | 163 |
| DmelGr10b | YNFFHN-----FNFALSAIMHWGLR         | 159 |
| DmelGr89a | YDLLCSVP-----FLKGAGGRLPWSQ        | 158 |
| DmelGr57a | YLMAINS-----AAVQVASHGRALFL        | 175 |
| DmelGr47b | CFFSFSIS-----LIFDTRCTCGIPS        | 174 |
| DmelGr58a | ANLSILLG-----ALILFRIHSVQRIS       | 161 |
| DmelGr58b | IILLYSAF-----LCSTVLQYQLLSVI       | 171 |
| DmelGr98a | IVVTIYSN-----RALTINATYSELVFLA     | 167 |
| AaegGr93a | LWLNMNPT-----YRLYSNGDLFLSVV       | 174 |
| TcasGr19  | YCAFIIIFT-----VHLLFLLCIYHFFC      | 171 |
| DmelGr47a | IHLIQP-----IYMRRLLPSQFYLN         | 153 |
| DmelGr58c | QQLLTRDS-----VVNCSNSSSLRQAMV      | 166 |

|            |                                                           |     |
|------------|-----------------------------------------------------------|-----|
| TcasGr38   | IVSE----Q-----EWSFSTGLLVMIFNSALS YKASEIVVMLRSRFAILN-----  | 214 |
| TcasGr46   | IVSE----Q-----EWSFSTGLLVMIFNSALS YKASEIVVMLRSRFAILN-----  | 196 |
| TcasGr1    | RNQEYKYYQ-----ILSHLSGIFFTFVNVAQC YLTTLELVMLLQTRFVILN----- | 199 |
| TcasGr123  | NLNG---DT-----MIVEAMAYILLAMNSAVCHQTIELVKMLKIRFVILN-----   | 197 |
| TcasGr62   | NLNG---DT-----MIVEAMAYILLAMNSAVCHQTIELVKMLKIRFVILN-----   | 472 |
| TcasGr25   | IFSVPLLMK-----IASQFVGIFCSLYFCIFGYIYDDEMVPVQN-----         | 100 |
| TcasGr59   | IFSVPLLMK-----IASQFVGIFCSLYFCIFGYIYDDEMVPVQN-----         | 275 |
| AgamGr2    | QLTVPTPPK-----KTNFNATTKVITVKPYQPKQPAS PPLKPSVTPPPPHRNGAI  | 211 |
| AaegGr66a  | NAVQPIMPM-----KPHGNQQGKII SVKPF EKRLTEEKVLAQKR-----       | 288 |
| DmelGr66a  | MDIGSIGKS-----SVSGSGKNKVPVVAHSMNSFGEA IDAASRKPPPP-----    | 302 |
| TcasGr11   | Q-----IMLFVS----ALIKAFSKYQFVVLVLQLQHRFGKIN-----           | 207 |
| TcasGr55   | Q-----IMLFVS----ALIKAFSKYQFVVLVLQLQHRFGKIN-----           | 207 |
| TcasGr21   | TK---TYSL-----FIVFMTVILPYFINLLMELQYCHYLNILRVRYQLLN-----   | 213 |
| TcasGr56   | TK---TYSL-----FIVFMTVILPYFINLLMELQYCHYLNILRVRYQLLN-----   | 213 |
| AaegGr     | I---CGTT-----WAAFF---LPFMMTMITSLFVCIVNQSKHRFYLLN-----     | 213 |
| AaegGr28a  | F---SITA-----WMSFM---LPFMMISMITVLFVSLLNQSR CRFQQLN-----   | 109 |
| AgamGr33   | P---SVTT-----WMAFL---LPYFMMSMIVLFLCFVNTKHRFHLLN-----      | 211 |
| DmelGr28bB | P---SFCV-----CMTFF---LQHSVVSIAICLFCVIAFSFERRLSIIN-----    | 213 |
| DmelGr28bC | P---TMAL-----HFTFL---IQHTVIAIAIALFSCFTYLVEMRLVMVN-----    | 240 |
| DmelGr28bD | P---IYTA-----IVAFY---VPQIFLLSIVMLFNATLHRLWQHFTVLN-----    | 210 |
| DmelGr28bA | A---SWQL-----TFIFV---YELLAISITICMFCLMTRTVQRRITCLH-----    | 222 |
| DmelGr28bE | TF---SISA-----VISFF---SPHFIVCAVSFLAGNVMIKLRIYLSALN-----   | 217 |
| AgamGr25   | KENSNSAN-----VLGYFPFYCLYIILMMFHVLFAQAALGIGNRFRHLN-----    | 212 |
| AaegGr43a  | KENQDSGAN-----VLGYCPFYALYIILMMFHVLFAQSALGINRRFRHLN-----   | 211 |
| DmelGr43a  | IAQSDTELN-----VHWYIPFYSLYFILTGLQVNIANTAYGLGRRFGRLN-----   | 207 |
| AgamGr37b  | SRLESFDTP-----ALDVAALAISSFCFLQIVQFTVMVLLVLSRYQTIN-----    | 206 |
| AgamGr37d  | ELVPHIEPS-----LKEILPSAMFGLCFLLQICQFLLFLLVLH DRYCAIN-----  | 202 |
| AgamGr37a  | LHESSCNMQ-----ILFVFIYLLFVNSYALMMLQCTAFMEIIRTRYKLIN-----   | 216 |
| AgamGr37c  | WLNWNQLIG-----HVFQFVRLLYFTTYVHLWLQATLAAMLVLSRYEALK-----   | 210 |
| AgamGr37e  | WLPLFGVQV-----HAFNLVRFLYFYYSVHLWAQAAILTLFVLVLSRYIALN----- | 210 |

|            |                                                                                            |     |
|------------|--------------------------------------------------------------------------------------------|-----|
| AgamGr37f  | NQPNFDGRW-----YYNMF5FVYNAAFPTITSYFAIVLWFLLVRFQRLA-----                                     | 210 |
| AaegGr28c  | YRGLVDGLG-----VFYVFSRFLYSCGYVQVWLQSTVLLLVWSRYVALN-----                                     | 209 |
| AaegGr28b  | EMSSGFGMP-----ISMALIFGCFYVPSLFTHNLSMIGYLVSYRLNHLN-----                                     | 216 |
| AaegGr28e  | EMSSGFGMP-----ISMALIFGCFYVPSLFTHNMSMIGYLVSYRLNHLN-----                                     | 216 |
| TcasGr14   | SDVSYNLF5-----FVPLVNVNLDHFLNDILSDICDKFEQINQHFRRQIKS---                                     | 183 |
| TcasGr49   | SDVSYNLF5-----FVPLVNVNLDHFLNDILSDICDKFEQINQHFRRQIKS---                                     | 227 |
| AmelGr4    | TEIIYFKPE-----PITLLGNLIPTIFAGLLFVQYFFVITLINEMFIKLNCI---                                    | 211 |
| AmelGr5    | TEIKNFNPN-----PLVLMASIIPLIFVGLLFIQYFFVLNLIYAI FVKLNCI---                                   | 211 |
| TcasGr16   | EELDLVWRE-----VCTFVVQVYPRLVVNTINLTFTLLMILEGRFRVINDG---                                     | 206 |
| TcasGr22   | -----CQDQ-----ILIFLVNWPRLIIGIMNSTLNLIFLLIQTRFEMINN---                                      | 121 |
| TcasGr17   | -----KSKQ-----VEYFLIHWPRLIISTKLLAHFLILTVLTKARFEAINN---                                     | 196 |
| TcasGr150  | -----KSKQ-----VEYFLIHWPRLIISTKLLAHFLILTVLTKARFEAINN---                                     | 196 |
| TcasGr32   | FANIMGLEF-----YKQFAIEYFQMYVLFVNFVAFVFFVVKMLLVRYRNL---                                      | 180 |
| TcasGr54   | FANIMGLEF-----YKQFAIEYFQMYVLFVNFVAFVFFVVKMLLVRYRNL---                                      | 180 |
| TcasGr37   | FTLLLGVD-----VKEYAFEYIQLYSQFIFYFLLFATLKILLGKYTQLK-----                                     | 165 |
| TcasGr53   | FTLLLGVD-----VKEYAFEYIQLYSQFIFYFLLFATLKILLGKYTQLK-----                                     | 165 |
| TcasGr5    | WTRIMGVAY-----FQYAVEFFQFYAQFIVYFLIYAVLEMLLQKYKTVT-----                                     | 176 |
| TcasGr12   | CQTVSNFEY-----FQKILLMIQLYYLYFDVIVISTFLQLFLEHYEVIN-----                                     | 170 |
| TcasGr13   | CQTVSNFEY-----FQKILLMIQLYYLYFDVIVISTFLQLFLEHYEVIN-----                                     | 244 |
| TcasGr104  | WICEMGVVT-----LQAYTLHLFCVLYVLLHFLTYNLSLGIKLRYYDDVN-----                                    | 201 |
| TcasGr45   | WICEMGVVT-----LQAYTLHLFCVLYVLLHFLTYNLSLGIKLRYYDDVN-----                                    | 201 |
| TcasGr98   | RIAAGKPLT-----LKL FALHEFYGFCYLWVLI L I C N I A L A F K Q R Y Q L I N -----                 | 199 |
| TcasGr52   | FIVPSGVVY-----KIGYENLHQICHICELHTIFLVCNVLT V F K I R Y K D L N -----                        | 140 |
| TcasGr105  | WSPID---H-----TESNIINDMCSLYIILQITLIVNYALALAKNRFKELQ-----                                   | 194 |
| TcasGr4    | YKCGIQYHI-----CNTVISATVCFMMLLMLEIWRRFITLNNYLTIVLGETWTSL                                    | 197 |
| TcasGr44   | YKCGIQYHI-----CNTVISATVCFMMLLMLEIWRRFITLNNYLTIVLGETWTSL                                    | 201 |
| AgamGr9a   | FLSVYIVDC-----TFMYFDVVI E L V L G L C D C L L L I A H L Q L E R L V W I V K N R D - Q A    | 211 |
| AgamGr9c   | FL-VYMVSC-----TFMYFDLVI E L V L G L C D C L L L I A R L Q L E R L V W I V K N R N - D T    | 208 |
| AgamGr9b   | FLPLYITSC-----AFMYVDLAMELV L G L C D C L L L I V R L Q L Q R L V C S A R N L E - R S       | 260 |
| AgamGr9d   | FVSMYIVSC-----FFMYIDLAMELV L G L C G C L L L V A Q L G R L A Q A A R E F D - Y G           | 215 |
| AgamGr9e   | AWYLYLTIG-----IYLYEDLCLSWLFGFYSTIMMHCVDQLSYAAHLLQED--HA                                    | 208 |
| AgamGr9f   | PWYMF LNIG-----IYIYEDLCLSWLFGIYSAIMLFCVAQLSCAA K L L Q S D Y Y H S                         | 205 |
| AgamGr9g   | FVHIQLSVC-----IYLATDLALDWT L G L C C V M I L V G I A Q L S H I F D L L K I A S I R R       | 212 |
| AgamGr9i   | FVHLQLSVC-----IYLAMDALGWTLGLCCVVMVVGIEQLSHIIDL L L K A S D E R                             | 212 |
| AgamGr9h   | FILMYIETL-----LLLYANNCIEFTIIICCTQMTLCRYLKDLMNALETKK---                                     | 213 |
| AgamGr9j   | MVLMDMIIL-----LRF CFMFLILELYRVCVRIIRKRMKQLQVLLTQMEEIN--T                                   | 246 |
| AgamGr9l   | IFKLYWLIL-----LRF CFMFMVVELYRACVIVIEERMKQLHSLL-QLTING--P                                   | 236 |
| AgamGr9k   | HKMLTTTFV-----LRYTGMIHFLYLFHMCVSMVGLRMEQLKMLFHHKQT-----                                    | 226 |
| AgamGr9m   | HTFLELTLI-----SRFLLTQYIYLYLVCVSMVRLRMQQLRVLFLDHQH-----                                     | 229 |
| AgamGr9n   | IKILAVMIA-----GRFLAIWVLI F V H R L H V R A I G Q R M E Q L R V L Y A S -----               | 198 |
| AgamGr10   | LKILRMMTA-----GRFFT I W M L I F V H R L H V R A I G Q R M E Q L R V M Y A S -----          | 198 |
| AgamGr11   | LRILSMSVA-----LKIFIGIGYLCI IHRVCVGAIGVRMRQLSILGKLSG-----R                                  | 199 |
| DmelGr23aA | LMWLLRYRY-----VQLVQHVMVDLNQRSIHLRRSLLSMASGNDLWQP-----Y                                     | 199 |
| DmelGr23aB | SFLALQVQI-----ISF ILEVMVNI R V R Q T K L Q L L I L A R E L S C R W P Q R K Q K P Q F       | 202 |
| DmelGr39aA | TMQISRVL T-----LIGFVYRCVLANFQFTCYTGMVVILKLLQVQVKQLEHLVS                                    | 203 |
| DmelGr39aB | DASRLFVIT-----SLGFPLRYLVTSFTMGTYFCMVHIVRLVLDWNQSQINAIID                                    | 204 |
| DmelGr39aC | LTTIPIYLL-----QYGF SYLFLGQVVVLFACIQIILLSILKYYNQVVLK-NIKS                                   | 206 |
| DmelGr39aD | TLPLALCML-----VYIFAFLLVCLLLMFFVSLKQVMTAGLIHYNQQLCQGDLS                                     | 206 |
| DmelGr98c  | PFFHWVNQV-----LTQIILIMLQKGPYCLFVLLVYELILRTRHVLEQLKDDL                                      | 221 |
| DmelGr98d  | PYLHWTNKV-----LTEIILIMLQKCTEYCVFVLLIYELILRGRHLLQSLDEL                                      | 219 |
| DmelGr98b  | PVFSTLLKI-----LTFEVMIMQQLKSLEYCVFVLI I Y E L V L R L R R T L S Q L Q E E F                 | 219 |
| AgamGr51   | LASWLTFYA-----MMYF I A V I E N F I L A G V L I G A V M Q A M V N I G L K R L A R S R ----- | 237 |
| AgamGr52   | VVVGVTFSV-----FRYVFTALVNLVYVGLMIVSFNQGSINSKLTSLVDR-----                                    | 231 |
| DmelGr94a  | LIWTLYRLF-----PLIISNFNLCYFGAMVVVKEI I Y A L N R R L E A Q L Q E V N L L Q                  | 214 |
| DmelGr97a  | SVTTTKTML-----PLIVSNQINNCFGGVLVLANLIFAANRKLHGIVKEANMLQ                                     | 235 |
| DmelGr93b  | LLTLVCDLY-----TSVGTGMITHLCFVGYSIGVLYRDLNNYVDCQLRAQ---L                                     | 225 |
| DmelGr93c  | LFATLCEIF-----LEIGSLMI I H I G F V G Y L S V A A L Y S E V N S F A R I E L R R Q ---L      | 219 |
| DmelGr22d  | VLNVLVSM-----VKLGTLLALHYHLGVV I I Y R F V W L I N R E L L S L V C S L R G N H              | 220 |
| DmelGr22e  | FIGLSLCL-----MLLAVLLGASHFHLAVVVFYRYVWIVNRELLKLVNKMAIGE                                     | 223 |
| DmelGr22a  | VYEAVCIYI-----VQLEVLVMMVHFHLAVIYIYRYLW I N G Q L L D M A S R L R R G D                     | 222 |
| DmelGr22b  | ICLVLLSCL-----MEFSLNLMHYHVGVLLIYRYVWLINEQLKDLVSQKLNPN                                      | 221 |
| DmelGr22c  | VEMVLINSL-----VQFSFNCNIMHYIGVLLIYRYLW I N G Q L L E M V T N L K L D C                      | 218 |
| DmelGr22f  | KILKILCCL-----PSVGLQIIMHFTEI I L V Y R Y V W L V N E T L E D -----S H                      | 214 |
| DmelGr36a  | FVGMASDFW-----MSAIINMAISQHYLVILFVRAYYHLLKTEVQRQAIHESQMLS                                   | 208 |
| DmelGr36c  | YLGLGLQYW-----MFVILNMAMMQQHMIMLFVRTQFQLINTELQVIDEAKDLL                                     | 208 |
| DmelGr36b  | MMGLLVKLC-----VSFIMNLAISQHFVLVILLIRAQYRIMNAKLRMVIEESRRLS                                   | 208 |
| DmelGr59d  | ALRIWAVLS-----LTAIINVIITQYVATACVRGRYALLNKDLQAIIVTESQ--S                                    | 207 |
| DmelGr59a  | LCNGLLVNI-----SLTILFVNTFFYFTSLWHIARGYDFVNQQLNEIVACQSMDL                                    | 207 |
| DmelGr59b  | VLRFFFKCN-----TNNILEMVPMGYF L A L W H I A R G F D C V N R R L D Q I V K S K S T --         | 209 |
| AgamGr26   | ARSSAVYTL-----SNVINVLALLQYAYVLYVLYFCYYDTNRLLLASYNRHLLVRG                                   | 227 |



|            |                                                              |     |
|------------|--------------------------------------------------------------|-----|
| AgamGr27   | LCHSVLYIL-----PNVINVLALYQYAALQLIVAACYRSVNSVLARYHDHQARP-      | 227 |
| AgamGr29   | LAKIVIFLA-----TQLMATSLTLLYLTFIFGTVSVLLRQMNDTLEGILVGPIS-D     | 229 |
| AgamGr31   | LLKVVYILA-----TQLMNSFTLQYLVFVGIVAVLLRQMNDTLELILYGTVVYD       | 230 |
| AgamGr30   | TLINLCYIP-----PFIATVINVLHYYALFGTISGIMSCSNDTLYGTIVGEGKDR      | 229 |
| AgamGr32a  | TLLNVSYLA-----PYVTIAVYIILLYRALLASIAGIVGCLNDNLRREITIQDRIDP    | 229 |
| TcasGr2    | EYDIFKALV-----LQITINLQITFIWYNDLDFVMLIS--TALAYRFGQIT-----     | 247 |
| TcasGr9    | EYDIFKALV-----LQITINLQITFIWYNDLDFVMLIS--TALAYRFGQIT-----     | 247 |
| TcasGr7    | DYNIVMALV-----LQFITLQHTFIWVFNDVDFVMLLS--TALAYRFTQVT-----     | 249 |
| TcasGr30   | DYNIVMALV-----LQFITLQHTFIWVFNDVDFVMLLS--TALAYRFTQVT-----     | 249 |
| TcasGr29   | DYNIVMALV-----LQFITLQHTFIWVFNDVDFVMLLS--TALAYRFTQVT-----     | 249 |
| AaegGr64f  | PYHPALGVA-----IEVVMRVAKFTWHYIDVFIICVS--LVLQRRFQQYN-----      | 207 |
| AaegGr64a3 | PYHPALGVA-----IEVVMRVAKFTWHYIDVFIICVS--LVLQRRFQQYN-----      | 207 |
| AgamGr14   | PYHPVVGWT-----IELTMRIAKFTWHYVDVFIICLS--LGLQRRFVQFN-----      | 271 |
| AgamGr18   | PFNGFTIAI-----TEWINRCMRYTWTYLDIFIIISFC--YGAQFRYEQIF-----     | 243 |
| AaegGr64d  | PVNIGSILF-----VEWINRCLRYTWTYLDLFIISFS--YAAQFRYTQIY-----      | 275 |
| AgamGr17   | PYSLPAVLL-----LELTHKIFLYVWTFMDLFIIFVA--LGLARRYEQFY-----      | 232 |
| AaegGr64c  | YSLPLALL-----LEFVHKVYLVWTFMDVFIISVVS--IGLATRFEQLF-----       | 257 |
| DmelGr64c  | HFTAWWIPF-----IEWTTLSTMTFVWNFVDIFLILIC--RGMQMRFFQMH-----     | 236 |
| DmelGr64d  | EYRAWMVFF-----IEWNTMAMTFVWNFGDIFLFLMC--RGLKIRFQQLH-----      | 245 |
| AgamGr20   | PYHLLTMY-----LLYTTISLTFIWTFTDLFIMLVA--TGIACRFGQLN-----       | 264 |
| AaegGr61a  | PYNLPVALY-----NEYVVVAMTFAWNFVDLFIIVLS--IGLTTTRFTQLN-----     | 258 |
| AgamGr21   | PYNSLSAVF-----FTYVSSALTMWNYQDIFIIMIS--IGLATRFQQIN-----       | 286 |
| AaegGr64a  | PYSTVSAVF-----FSYVSFALTYWNYLDVFIILIS--IAIATRFDQIN-----       | 168 |
| DmelGr64a  | PYSPIIAVL-----ILLINGACTFVWNVMDLFIIMIS--KGLSYRFEQIT-----      | 282 |
| DmelGr61a  | PFNIFSMCY-----GFWLNGAFTFLWNFMDIFIVMTS--IGLAQRFQQFA-----      | 265 |
| AgamGr15   | PYSTWRGFL-----TKFFNVICNFMWSYVDLDFVIVIS--MGLSHAFRKYL-----     | 268 |
| AaegGr1    | EYSEIRGFV-----VKFINVISTFVWSYIDLFIIVS--IGLSHTFRRLIN-----      | 273 |
| DmelGr5a   | PYSNWLAWL-----GKIQNVLLTFGWSYMDIFLMMLG--MGLSEMLARLN-----      | 269 |
| DmelGr64f  | SYSTTLALW-----GKFQNVSTFIWNYMDLDFVMIVS--IGLASKFRQLN-----      | 294 |
| DmelGr64e  | DYTRFLGIV-----GKVVNVSTFAWNFNDFIVMAVS--VALAARFRQLN-----       | 288 |
| AmelGr1    | SYSLWKGIL-----VDIINILSTFSWNFVDLFLILIS--IALTDQFRQLN-----      | 217 |
| AmelGr2    | NYNFVYGLY-----VFVSKLATFTWNFTDLFIMLVA--TGLAERYKSLN-----       | 305 |
| AgamGr16   | PYNPYIGFL-----AQTITSLTIVYWNYVDLFLISVS--VGLRTNLAQVN-----      | 242 |
| AaegGr64e  | PYDIYVGFV-----AQVVTSVLTFYWNYVDLFLIVLS--IGLRQSVRHVN-----      | 260 |
| TCasGr6    | LYHTTAYLH-----IITMINMNCALWYINCRAVGNAS--TALAESFQNVLVPT--      | 201 |
| TcasGr26   | LYHTTAYLH-----IITMINMNCALWYINCRAVGNAS--TALAESFQNVLVPT--      | 201 |
| TcasGr33   | LYHTTAYLH-----IITMINMNCALWYINCRAVGNAS--TALAESFQNVLVPT--      | 201 |
| AgamGr23   | LWHTSAYYH-----IITMLNMNSALWYINCRGIRVAS--SSLSRCFR-----         | 296 |
| AaegGr21a  | LWHTSAYYH-----IITMLNMNSALWYINCRGIRVAS--SSLSDRFR-----         | 288 |
| TcasGr10   | LWHTFGYYH-----ILAMLNCLCSLWFINCTAKGRVA--VWMCNNLH-----         | 244 |
| TcasGr39   | LWHTFGYYH-----ILAMLNCLCSLWFINCTAKGRVA--VWMCNNLH-----         | 244 |
| AgamGr22   | FCHTFAYYH-----IIAMLNCFCSLWFVNCTAFGTAS--KAFAKELT-----         | 269 |
| AaegGr21b  | LHTTFAYYH-----ILAMLNCFCSLWFVNCTAFGTAS--KAFQELS-----          | 269 |
| DmelGr21a  | LWYTFAYYP-----IIAMLNCFCSLWFVNCTAFGTAS--RALSDALQ-----         | 270 |
| AgamGr24   | LLQVIPYCV-----LDTITYMMGGYWMACETLSITA--KILAEDFQ-----          | 195 |
| AaegGr63a  | LVQVIPYCI-----LDTITYMMGGYWMTCETLSITA--NILAEDFQ-----          | 260 |
| DmelGr63a  | INQVVPYCI-----LDNLTAMLGAWWFLICEAMSITA--HLLAERFQ-----         | 289 |
| TcasGr3    | IIQVVPYCY-----INCLIYLIIGGFWMQCDVVGKVA--SQLAEDFQ-----         | 251 |
| DmelOr83b  | SANSKSELI---HNEEKDP-GTDMDSMGIYSSKADWGAQFR-APSTLQSFQGGGGG--   | 314 |
| AgamOr7    | SAGSKSELI----INEEKDPDKDFDLDSGIYSSKADWGAQFR-APSTLQTFDENGRNG-- | 313 |
| HvirOr2    | STE-----KEKIPDPTVMDIRGIYSTQQDFGMTLRGAGGRLQNFQQPNPN---        | 308 |
| TcasOr16   | SATSQDQ-----LIENDYNEKNEDLKGVYSTRQELGGHFR--GGALQNFQSGGVG---   | 410 |
| TcasOr22   | SATSQDQ-----LIENDYNEKNEDLKGVYSTRQELGGHFR--GGALQNFQSGGVG---   | 449 |
| AmelOr2    | SAEQPKQEPLPPVTPPQGENMLDMDLRGIYSNRTDFTTTFR--PTAGMTFN--GGVG--- | 314 |
| TcasGr31   | AITIRSTFS-----WTFIDVFIIMLTSTAFVFRKQLNAKVEMLKKNARVKN-----     | 137 |
| TcasGr35   | LKESVDTFN-----DIFGWIILCNIFEAAKSLIYIDMI IKKNVTQQNSD-----      | 149 |
| DmelGr59c  | IVKLSLLAT-----LTTIFNMIVCQYLLAMVQVIGLYKILLQDLRCLVRQAECIC      | 211 |
| DmelGr92a  | WWCDFYLVS-----ATNIFIHINSIGYLSLGVLYSELNKYVYTNLRIQLQKLN---     | 221 |
| DmelGr28a  | TFALPHINIS-----LMVFKFLCTTDLARSRFSMLNEILQDILDAHIEQLSALELS     | 229 |
| DmelGr64b  | PYHFWMPLPI-----LEWVNQTIAYPRSFDFCFIMCIGI GLAARFHQLYRR-----    | 231 |
| TcasGr71   | AVQLYFQFY-----YTYFLCVIVCIFRQKRYRNINLLLTFEQLQNRFFFAKK-----    | 193 |
| AgamGr19   | ALAHRLVFLP--KSIIQLSLLYIFRALTMAWTVQDVLLIMISDSIAGYFKRINSR----- | 224 |
| AaegGr64b  | PYNVPVLF--VRYVYVVTMAWYQDILIMVISAYVLTTRYRQFFWR-----           | 173 |
| DmelGr93d  | IICNSIMCFG-----FIWHLVSLGVLYAELNDNLRFESEGFQTAFLRQKQIR-----    | 224 |
| TcasGr34   | IEIYSQFLYG-----FMIYLILDTIKSKYRQMHRLLANKYVITSDEFFYLVS----     | 180 |
| TcasGr43   | RHTVEYFQN-----YIHFFYQLLLYLITDMILMRYKELNVRVILDNMSRN-----      | 192 |
| TcasGr47   | RYTLSFIEN-----YCQFLYNCFHSTLLMLILSRYQLKQAQLWQNR-----          | 172 |
| AmelGr3    | YAPLYFMYT-----VIIISTEIQYTVSTYNIQGRFIRLNTSLKDLFNANSNNNDNAID   | 240 |
| AgamGr32b  | AQTVPFVVS-----SLILNQYFCVVFHLTSILRKMNERLARFLNMLPGSATEPP       | 232 |
| AgamGr50   | IYSILGVCN-----LLQISSMNVAVNLLMFVLYSGINIYARINAHCNLDLVYG---     | 212 |

TcasGr20 PVVYSYLLIFVQQIPFCFFVRVIRLKIEDLNGAFRAGLERVQNGENQWISVMKVKNQ--- 231  
TcasGr79 LWSQLFSTFAG-----IEVLHVVKQCYHLQKINVQQSGIFINLPFLEHNLIR---- 200  
TcasGr15 VYPLFVLLIVS-----NVLKILVEKYRHKQNFINESNVETVKFNLFLLSQAVETF 207  
TcasGr60 FDLIFLSFR-----CCKLCKEANKTAFWLWYHIKIDREDEEARDDFIKLG----- 191  
AgamGr38 PWMLLLNLG-----YSYFSLTTFHILSLTCLDVVRRARNVRLNKVFRKQFSLEG-- 219  
TcasGr51 ALKLWVIVALFKNENLSEMVKQFLFTQKFTFVAGLATLSVLNLLSVIKSSFLDINTWKML 504  
DmelGr39b SLLSILIIIR-----MQFVLVLLNVELLGHVSLLGIRLQNVLECHLMGAN----- 196  
AgamGr28 LFTMGAYVLP-----NMLASMSLAQYYAGTVLIYKLOHTVNVQQLRTAIGKHR--- 215  
TcasGr61 LLGPHTYFVKGTGRKTVLKTNKYCNFIILFYLSVVFVILVYYASLDETPNPVTVNGKLYNFN 358  
TcasGr50 SYCPIVTTG-----I IKIQFATCAHLILQRVNHVKKILEKETQTVAFPKDN----- 205  
AgamGr12 LYVTILEAVR-----VYVTMIAILIIYIVCVLVVKMHFRQLQDRVEQFGAS----- 207  
AgamGr36 NSFSYALTG-----IQFMIVNFHFVAAARLVSFRLDAIKCSLKKHLDTGSWYIE- 222  
AgamGr48 TVNIYVVMMS-----SQFTNLLLLMLLFGSYVYGQINKQLDRTVHRLASFETOQS- 219  
AgamGr49a TVAIDLLQSF TWYGTFLWLQRKFGATYILAFWLNSIAVMQIVAAALNILLATLLWG---- 241  
AgamGr49b TLNIFSVWQS-----AIFTNLIIVVTLIIGVHFLEILNHRRLTYIRQMRAPACHLK 223  
DmelGr2a YLLPLLVCG-----LRYFQIFNATQLVRQRLDVLVLAQLQLHQKGPVADT--- 229  
DmelGr32a FYFIQNGLTAT-----YIVFASALLRIVYIRFHFINQLLNGYTYGQQRHRKEGGARA 271  
DmelGr68a YFLQLLYST-----LLALYLRLTMMNLAQRIGFLNQLDFTFNLQDCGHMEN----- 216  
AmelGr7 FIVFGVSTIS-----FCFVWTCLKKFRQLNELLRSRIMESPIHKRVLEMTNN-- 222  
AmelGr8 LLIISTLYLN-----NVYILNACFKFINNSLIKIKEIVINDEPHLLRREYHMK--- 229  
AmelGr9 FINFSVDMFVFN-----CIWVLKVCFKKLNKSIHELKFKRSGNDRVETIVQOKN--- 223  
TcasGr57 NTTIFLIFHS-----VLPKRFFTSLGIAFDNIMKNLICEIDGRHEFFLAEFKS- 206  
TcasGr41 YIFDVPNFVN-----EYVQAIIEVLYICSYTVLIRNKISNLNTSLIHSTHLNG--- 206  
AgamGr34 QFVNVIAVT-----QVVLNLLYINARFRKLNQLLEEEQHPVAGRKRFRERASRLAGN 221  
AgamGr35 IYAMAFLHAYVLIYWLHARFRRLNTLVEQYRQGHIFAPARQTIISFATMVKLDEES--- 258  
AgamGr39 MCNLVYIMTSCFCCVTLWAIIVRYHNINATFWYVSLHQPVCITGGRNHVLLNSFASMYFH 239  
AgamGr40 EMVVFLRSS-----LVFTIFGSYITVALTTIYMRFRALNKMIREKFPTRTADP- 215  
AaegGr28d IILAMCRSATS-----LGIFTCYITMTLYSLKTGFDQLHQAIAKHLNTPPQAIN--- 223  
AgamGr42 NTTLSLQSM-----MQAITSYYYIIRSIIHISCVVAFISGLYSFRDRFFAFNKQLR- 236  
AgamGr41 AISIPLLSLASIRGLEFWMDFVLDTFVGFWSGGLLYNNICNVLLFHILYRIEIVN--- 237  
AgamGr43 ITILEFTTLVKSTECILTKLNWMLDTFLESQQRQSTPSVTLKGEKNPTNKVYPLNRR- 239  
DmelGr33a RHAPLTVFDIESEGKKERKTVPTITVMDGRTTTGFGENENKFAGEMKROEGQKNDDDLD 270  
AgamGr44 LLSLCIFYYP-----KLTIIICSVSLYAVMLFQQNLHYALNERLKLQILVEHTG-- 218  
AgamGr13 HVNNFYALLFVQRLTLGEINDMLADLWTICIRPGANELLPSPRRLLQLHLQYQOCAG--- 229  
AgamGr45 RDSGSPFSS-----NCLLLCIIPQTLCVISELQFVAFALLISERLKLNNR--- 249  
AgamGr46 MYMSDFIPAS-----EYCFIECFITMLTSSTVELQYVAFVQLIKNRLQINDLLVE 239  
Dmelr93a GTGFGIYMWLG-----TLCVLDACFLGFLVSGILYEHMANNI IAMLKRMEPIESQD-- 232  
AmelGr6 YMCTYIGTAT-----AVYKFFGMASFLGLRFHQLNQIAKENLPPRVGYKSSNVS--- 268  
AmelGr10 GIIFYIMDAS-----MNTQILIFVCILFLIEERFRHLCSMIELSKADKIEAHR-- 204  
TcasGr28 FFGSIQFII-----ISKHWVTIMKEWSFMEMSMRNYGSSINMKRFVVMT----- 170  
TcasGr40 TGVEHFFKK-----QFHYIFTYMPYNIIVFGLCLTTFGLLPVNGVTSEKCN----- 221  
AgamGr3 WFWLHNFYP-----YTFSHVRHVHLLHISLMASNLRQLQRKLVALHQGTGER--- 221  
AgamGr4 AFLRLRHLFH-----MFFIDILKIHQLKHHDLVDAGEYMAADLVEQPQDTAVFR-- 250  
AgamGr6 HRNWLKVV-----LQAVRARYLQMMVLVDRDLGKLEQLHHRVLSGSS--- 242  
AgamGr7 LVTDGVSPGRP-----KPTTEATAVPPKAQTSLTRWKMNGPSRPAVIVDSWTGLSTMKS- 245  
AgamGr47 NAGGMMKSKG-----PPKVTMVAPASAGFNKLSATTVYTYTYITQLKIDNQSS--- 232  
DmelGr8a PLVWLTYLR-----NLQFVLHLELLREQLTGLEREMGLLAEYSRFASSETGR--- 213  
AgamGr5 VYFFALQYILN-----IKLQOIYPAILLDTYLRMTRAALEHHVGLLQCSERLG--- 260  
AgamGr8 FLLLHLRQLQ-----ILLYTNVLGFCFKAINSELAWTIELSNGASRYGRRSD--- 205  
DmelGr9a LENLRYAYS-----LQAVRARYLQMMVLVDRDLGKLEQLHHRVLSGSS--- 181  
DmelGr59f SINSYVMPN-----I ISSISFAQYLLQLQGIARQRRLTEGLERELTHLHSP--- 231  
DmelGr77a MYACSLVFS-----VCQAILQLSLGMYTMAILFLGHLVRHSNLLLAKILADAHEIF 252  
DmelGr85a CFLPECMIFS-----MNYLLFAILAEITRCWWSLQSGLKMVLLNRQLSTVAFN--- 233  
TcasGr27 WFPFDYKQP-----VVFDLVYFILAFACISIAYTNVSTDAFFYTCLIQIET--- 198  
TcasGr48 IINFGYTTLA-----KFMIFTSTCIYTNLLRIIEADFSKLNHLLSGTEN----- 210  
AgamGr1 NHLILYGLR-----IYAYLSDTTVCASFGLFALLLRILIVEMRQLVRKTTINEQ--- 223  
DmelGr10a QVRVHFAIY-----AFVLWNYTENADYCYFINGSVLKYRQFNLQLGSLRDEMMDG-- 228  
DmelGr59e MSLGVLQYAQP-----VHFLWLVDQMRMCKELKLLQRPPQGSTKLDACYES--- 211  
DmelGr10b PFNVWDLNLAN-----LYFVYNSLARDAILVAYVLLLLLNLSEALRLNGQEQEHT--- 207  
DmelGr89a LVAYGVQLY-----FQHVASVYGNIGFGGILLMLECYNQLEREPTNLAR----- 203  
DmelGr57a LFALCYTIVTG-----GPHFTGYVHMTLAEMLGIRFRLQLLQPEFLNWRFP--- 223  
DmelGr47b TLLMAFTYT-----LLTSSVGLLGFVHIGIMDFIRVRLRLVQQLLHQYQAD--- 221  
DmelGr58a KTAMIVAHIT-----QFIYVVFMMTGICVILLVLHWQSERLQIALKDCSFLN--- 209  
DmelGr58b NPQIFLAFCAR-----LTHFLHFLCVKMGFFGVLLVLLNHQFLVIHLAINALHGR--- 220  
DmelGr98a RFSEFTLYC-----AVILFIYQELIVGGSNVLDELRYRTRYEMWSIRRLS----- 211  
AaegGr93a LMGP IIVCSLT-----ASRYCVIFLTVSCILDDINRDLRSRQVDQFHRQHSSANIS--- 224  
TcasGr19 AFIIIFTMHL-----LFCCAFIFFNMHLLFLCLDYFTLHLLFLPCIYFYFS--- 217  
DmelGr47a VGAYWLLYN-----MLLAAVLGFYFLLWEMCRIQKLINDQMTLILARSQQRN--- 200  
DmelGr58c PYQSAAIYVALIMILLMSYVDMTVYMEVAVAGNWLLVNMTQGVREMVQDLEVLPERNG--- 223

|            |                                                           |     |
|------------|-----------------------------------------------------------|-----|
| TcasGr38   | -----                                                     |     |
| TcasGr46   | -----                                                     |     |
| TcasGr1    | -----                                                     |     |
| TcasGr123  | -----                                                     |     |
| TcasGr62   | -----                                                     |     |
| TcasGr25   | -----                                                     |     |
| TcasGr59   | -----                                                     |     |
| AgamGr2    | QPWPAAE-----                                              | 218 |
| AaegGr66a  | -----                                                     |     |
| DmelGr66a  | -----                                                     |     |
| TcasGr11   | -----RTMRSFFSDNK-----                                     | 218 |
| TcasGr55   | -----RTMRSFFSDNK-----                                     | 218 |
| TcasGr21   | -----EYLETLVQETN-----                                     | 224 |
| TcasGr56   | -----EYLETLVQETN-----                                     | 224 |
| AaegGr     | -----KILRSLQEISV-----                                     | 224 |
| AaegGr28a  | -----KVLCLMRNKTV-----                                     | 120 |
| AgamGr33   | -----KVLKHLKQAAL-----                                     | 222 |
| DmelGr28bB | -----QVLKNLAHQWD-----                                     | 224 |
| DmelGr28bC | -----KVLKNLAHQWD-----                                     | 251 |
| DmelGr28bD | -----QVLKNLAHQWD-----                                     | 221 |
| DmelGr28bA | -----KVLKNLAHQWD-----                                     | 233 |
| DmelGr28bE | -----EVLKNLAHQWD-----                                     | 228 |
| AgamGr25   | -----VALYEMFPECTTLAHTDSSSLDRTSHPLVIF-----                 | 243 |
| AaegGr43a  | -----ITLYHVFPECR-----                                     | 222 |
| DmelGr43a  | -----RMLSSSFLAENN-----                                    | 219 |
| AgamGr37b  | -----ELFR-----                                            | 210 |
| AgamGr37d  | -----QAFR-----                                            | 206 |
| AgamGr37a  | -----GCFR-----                                            | 220 |
| AgamGr37c  | -----DLFG-----                                            | 214 |
| AgamGr37e  | -----NLFR-----                                            | 214 |
| AgamGr37f  | -----MAIRLASSTTTLPLIIKPKIHYRCIEQR-----                    | 238 |
| AaegGr28c  | -----RIVSLYVYAIITYVMRDSYTRKYSSVILGRAEIFFTVLFYSIIISIVCAFAY | 262 |
| AaegGr28b  | -----ATLT-----                                            | 220 |
| AaegGr28e  | -----ATLT-----                                            | 220 |
| TcasGr14   | -----                                                     |     |
| TcasGr49   | -----                                                     |     |
| AmelGr4    | -----                                                     |     |
| AmelGr5    | -----                                                     |     |
| TcasGr16   | -----                                                     |     |
| TcasGr22   | -----                                                     |     |
| TcasGr17   | -----                                                     |     |
| TcasGr150  | -----                                                     |     |
| TcasGr32   | -----                                                     |     |
| TcasGr54   | -----                                                     |     |
| TcasGr37   | -----                                                     |     |
| TcasGr53   | -----                                                     |     |
| TcasGr5    | -----                                                     |     |
| TcasGr12   | -----                                                     |     |
| TcasGr13   | -----                                                     |     |
| TcasGr104  | -----                                                     |     |
| TcasGr45   | -----                                                     |     |
| TcasGr98   | -----                                                     |     |
| TcasGr52   | -----                                                     |     |
| TcasGr105  | -----                                                     |     |
| TcasGr4    | SVYHLVEIS-----                                            | 206 |
| TcasGr44   | SVYHLVEIS-----                                            | 210 |
| AgamGr9a   | AMSIDRVLL-----                                            | 220 |
| AgamGr9c   | VDSIDGVLL-----                                            | 217 |
| AgamGr9b   | GNQEDDFLT-----                                            | 269 |
| AgamGr9d   | VDSPERFFF-----                                            | 224 |
| AgamGr9e   | HTLDERVR-----                                             | 216 |
| AgamGr9f   | DTLETRLR-----                                             | 213 |
| AgamGr9g   | TIALERIWP-----                                            | 221 |
| AgamGr9i   | AIAPELISP-----                                            | 221 |
| AgamGr9h   | -LPLASELY-----                                            | 221 |
| AgamGr9j   | TACVEHVVH-----                                            | 255 |
| AgamGr9l   | KLNVEHQVE-----                                            | 245 |
| AgamGr9k   | EDEFEYFLG-----                                            | 235 |
| AgamGr9m   | EHDFEQLLC-----                                            | 238 |

|            |                         |     |
|------------|-------------------------|-----|
| AgamGr9n   | -EELEQHLD-----          | 206 |
| AgamGr10   | -EELEQHLD-----          | 206 |
| AgamGr11   | HPAQEKVVY-----          | 208 |
| DmelGr23aA | GVQECLQLQ-----          | 208 |
| DmelGr23aB | SDQQAHRVK-----          | 211 |
| DmelGr39aA | TTT-ISMAG-----          | 211 |
| DmelGr39aB | ESADLKMTSPNR-----       | 216 |
| DmelGr39aC | SKESREFYY-----          | 215 |
| DmelGr39aD | GLRGR-----              | 211 |
| DmelGr98c  | EDFDCGARIQEL-----       | 233 |
| DmelGr98d  | EGNQSRDSVQEL-----       | 231 |
| DmelGr98b  | QDCEQQDMLQAL-----       | 231 |
| AgamGr51   | ---QGSAAGRQ-----        | 245 |
| AgamGr52   | ----SGEEKP-----         | 237 |
| DmelGr94a  | RKDQLKLYTKY-----        | 225 |
| DmelGr97a  | SPVQMNHLHKPY-----       | 246 |
| DmelGr93b  | RSLNGENNSFR-----        | 236 |
| DmelGr93c  | RSLERPVGGPV-----        | 230 |
| DmelGr22d  | KGSSSR-----             | 226 |
| DmelGr22e  | TVESER-----             | 229 |
| DmelGr22a  | SVDPDR-----             | 228 |
| DmelGr22b  | ETDFSR-----             | 227 |
| DmelGr22c  | SVDSSR-----             | 224 |
| DmelGr22f  | HLSSSR-----             | 220 |
| DmelGr36a  | EIYPRRAAFMTK-----       | 220 |
| DmelGr36c  | LSPRHQGVFMTK-----       | 220 |
| DmelGr36b  | FLQLRNGAFMTR-----       | 220 |
| DmelGr59d  | LVPNGGGVFVTK-----       | 219 |
| DmelGr59a  | ERKSKE-----             | 213 |
| DmelGr59b  | -RKHRE-----             | 214 |
| AgamGr26   | TDDTRYERRRG--AHEIV----- | 243 |
| AgamGr27   | -----                   |     |
| AgamGr29   | PNTDKSAAYFT-----        | 240 |
| AgamGr31   | EGTNGSHSRLR-----        | 241 |
| AgamGr30   | HRSCS-----G-----        | 235 |
| AgamGr32a  | RRTYGKHTTISYIMLQEG----- | 247 |
| TcasGr2    | -----                   |     |
| TcasGr9    | -----                   |     |
| TcasGr7    | -----                   |     |
| TcasGr30   | -----                   |     |
| TcasGr29   | -----                   |     |
| AaegGr64f  | -----                   |     |
| AaegGr64a3 | -----                   |     |
| AgamGr14   | -----                   |     |
| AgamGr18   | -----                   |     |
| AaegGr64d  | -----                   |     |
| AgamGr17   | -----                   |     |
| AaegGr64c  | -----                   |     |
| DmelGr64c  | -----                   |     |
| DmelGr64d  | -----                   |     |
| AgamGr20   | -----                   |     |
| AaegGr61a  | -----                   |     |
| AgamGr21   | -----                   |     |
| AaegGr64a  | -----                   |     |
| DmelGr64a  | -----                   |     |
| DmelGr61a  | -----                   |     |
| AgamGr15   | -----                   |     |
| AaegGr1    | -----                   |     |
| DmelGr5a   | -----                   |     |
| DmelGr64f  | -----                   |     |
| DmelGr64e  | -----                   |     |
| AmelGr1    | -----                   |     |
| AmelGr2    | -----                   |     |
| AgamGr16   | -----                   |     |
| AaegGr64e  | -----                   |     |
| TCasGr6    | -----                   |     |
| TcasGr26   | -----                   |     |
| TcasGr33   | -----                   |     |
| AgamGr23   | -----                   |     |
| AaegGr21a  | -----                   |     |

|           |                                                              |     |
|-----------|--------------------------------------------------------------|-----|
| TcasGr10  | -----                                                        |     |
| TcasGr39  | -----                                                        |     |
| AgamGr22  | -----                                                        |     |
| AaegGr21b | -----                                                        |     |
| DmelGr21a | -----                                                        |     |
| AgamGr24  | -----                                                        |     |
| AaegGr63a | -----                                                        |     |
| DmelGr63a | -----                                                        |     |
| TcasGr3   | -----                                                        |     |
| DmelOr83b | -----                                                        |     |
| AgamOr7   | -----                                                        |     |
| HvirOr2   | -----                                                        |     |
| TcasOr16  | -----                                                        |     |
| TcasOr22  | -----                                                        |     |
| AmelOr2   | -----                                                        |     |
| TcasGr31  | -----                                                        |     |
| TcasGr35  | -----                                                        |     |
| DmelGr59c | SIRNRR-----                                                  | 217 |
| DmelGr92a | -----                                                        |     |
| DmelGr28a | PMHSVVNHRYS-----                                             | 241 |
| DmelGr64b | -----                                                        |     |
| TcasGr71  | -----                                                        |     |
| AgamGr19  | -----                                                        |     |
| AaegGr64b | -----                                                        |     |
| DmelGr93d | -----                                                        |     |
| TcasGr34  | -----                                                        |     |
| TcasGr43  | -----                                                        |     |
| TcasGr47  | -----                                                        |     |
| AmelGr3   | YFRKCPETAAHMDDKKIWN-----                                     | 260 |
| AgamGr32b | VQLRGKPLIYN-----                                             | 243 |
| AgamGr50  | -----                                                        |     |
| TcasGr20  | -----                                                        |     |
| TcasGr79  | -----                                                        |     |
| TcasGr15  | N-----                                                       | 208 |
| TcasGr60  | -----                                                        |     |
| AgamGr38  | -----                                                        |     |
| TcasGr51  | VKSFDAIDSKLQTGGKVETSICKNFCFG-----                            | 532 |
| DmelGr39b | -----                                                        |     |
| AgamGr28  | -----                                                        |     |
| TcasGr61  | TFAKLLILVVSLSGTFGFFGTHILSYINKASFKKIVNTVATFDETWAKLGLEINHKEDFR | 418 |
| TcasGr50  | -----                                                        |     |
| AgamGr12  | -----                                                        |     |
| AgamGr36  | -----                                                        |     |
| AgamGr48  | -----                                                        |     |
| AgamGr49a | -----                                                        |     |
| AgamGr49b | QLR-----                                                     | 226 |
| DmelGr2a  | -----                                                        |     |
| DmelGr32a | RRQRGD-----                                                  | 277 |
| DmelGr68a | -----                                                        |     |
| AmelGr7   | -----                                                        |     |
| AmelGr8   | -----                                                        |     |
| AmelGr9   | -----                                                        |     |
| TcasGr57  | -----                                                        |     |
| TcasGr41  | -----                                                        |     |
| AgamGr34  | MPANEP-----                                                  | 227 |
| AgamGr35  | -----                                                        |     |
| AgamGr39  | TE-----                                                      | 241 |
| AgamGr40  | -----                                                        |     |
| AaegGr28d | -----                                                        |     |
| AgamGr42  | -----                                                        |     |
| AgamGr41  | -----                                                        |     |
| AgamGr43  | -----                                                        |     |
| DmelGr33a | TSNDEDEDD-----                                               | 279 |
| AgamGr44  | -----                                                        |     |
| AgamGr13  | -----                                                        |     |
| AgamGr45  | -----                                                        |     |
| AgamGr46  | LTAYG-----                                                   | 244 |
| Dmelr93a  | -----                                                        |     |
| AmelGr6   | -----                                                        |     |
| AmelGr10  | -----                                                        |     |

|           |                   |     |
|-----------|-------------------|-----|
| TcasGr28  | -----             |     |
| TcasGr40  | -----             |     |
| AgamGr3   | -----             |     |
| AgamGr4   | -----             |     |
| AgamGr6   | -----             |     |
| AgamGr7   | -----             |     |
| AgamGr47  | -----             |     |
| DmelGr8a  | -----             |     |
| AgamGr5   | -----             |     |
| AgamGr8   | -----             |     |
| DmelGr9a  | -----             |     |
| DmelGr59f | -----             |     |
| DmelGr77a | ESSQKAGFWPNR----- | 264 |
| DmelGr85a | -----             |     |
| TcasGr27  | -----             |     |
| TcasGr48  | -----             |     |
| AgamGr1   | -----             |     |
| DmelGr10a | -----             |     |
| DmelGr59e | -----             |     |
| DmelGr10b | -----             |     |
| DmelGr89a | -----             |     |
| DmelGr57a | -----             |     |
| DmelGr47b | -----             |     |
| DmelGr58a | -----             |     |
| DmelGr58b | -----             |     |
| DmelGr98a | -----             |     |
| AaegGr93a | -----             |     |
| TcasGr19  | -----             |     |
| DmelGr47a | -----             |     |
| DmelGr58c | -----             |     |

|            |                                                                |     |
|------------|----------------------------------------------------------------|-----|
| TcasGr38   | -----                                                          |     |
| TcasGr46   | -----                                                          |     |
| TcasGr1    | -----                                                          |     |
| TcasGr123  | -----                                                          |     |
| TcasGr62   | -----                                                          |     |
| TcasGr25   | -----                                                          |     |
| TcasGr59   | -----                                                          |     |
| AgamGr2    | -----                                                          |     |
| AaegGr66a  | -----                                                          |     |
| DmelGr66a  | -----                                                          |     |
| TcasGr11   | -----                                                          |     |
| TcasGr55   | -----                                                          |     |
| TcasGr21   | -----                                                          |     |
| TcasGr56   | -----                                                          |     |
| AaegGr     | -----                                                          |     |
| AaegGr28a  | -----                                                          |     |
| AgamGr33   | -----                                                          |     |
| DmelGr28bB | -----                                                          |     |
| DmelGr28bC | -----                                                          |     |
| DmelGr28bD | -----                                                          |     |
| DmelGr28bA | -----                                                          |     |
| DmelGr28bE | -----                                                          |     |
| AgamGr25   | -----                                                          |     |
| AaegGr43a  | -----                                                          |     |
| DmelGr43a  | -----                                                          |     |
| AgamGr37b  | -----                                                          |     |
| AgamGr37d  | -----                                                          |     |
| AgamGr37a  | -----                                                          |     |
| AgamGr37c  | -----                                                          |     |
| AgamGr37e  | -----                                                          |     |
| AgamGr37f  | -----                                                          |     |
| AaegGr28c  | RNTNLQVLQKLNRMDDQLLQEKLRTRIDHGKVVHSLMIVGIACHFIMTFIICGSYETVHVTV | 322 |
| AaegGr28b  | -----                                                          |     |
| AaegGr28e  | -----                                                          |     |
| TcasGr14   | -----                                                          |     |
| TcasGr49   | -----                                                          |     |
| AmelGr4    | -----                                                          |     |
| AmelGr5    | -----                                                          |     |

TcasGr16 -----  
TcasGr22 -----  
TcasGr17 -----  
TcasGr150 -----  
TcasGr32 -----  
TcasGr54 -----  
TcasGr37 -----  
TcasGr53 -----  
TcasGr5 -----  
TcasGr12 -----  
TcasGr13 -----  
TcasGr104 -----  
TcasGr45 -----  
TcasGr98 -----  
TcasGr52 -----  
TcasGr105 -----  
TcasGr4 -----  
TcasGr44 -----  
AgamGr9a -----  
AgamGr9c -----  
AgamGr9b -----  
AgamGr9d -----  
AgamGr9e -----  
AgamGr9f -----  
AgamGr9g -----  
AgamGr9i -----  
AgamGr9h -----  
AgamGr9j -----  
AgamGr9l -----  
AgamGr9k -----  
AgamGr9m -----  
AgamGr9n -----  
AgamGr10 -----  
AgamGr11 -----  
DmelGr23aA -----  
DmelGr23aB -----  
DmelGr39aA -----  
DmelGr39aB -----  
DmelGr39aC -----  
DmelGr39aD -----  
DmelGr98c -----  
DmelGr98d -----  
DmelGr98b -----  
AgamGr51 -----  
AgamGr52 -----  
DmelGr94a -----  
DmelGr97a -----  
DmelGr93b -----  
DmelGr93c -----  
DmelGr22d -----  
DmelGr22e -----  
DmelGr22a -----  
DmelGr22b -----  
DmelGr22c -----  
DmelGr22f -----  
DmelGr36a -----  
DmelGr36c -----  
DmelGr36b -----  
DmelGr59d -----  
DmelGr59a -----  
DmelGr59b -----  
AgamGr26 -----  
AgamGr27 -----  
AgamGr29 -----  
AgamGr31 -----  
AgamGr30 -----  
AgamGr32a -----  
TcasGr2 -----  
TcasGr9 -----  
TcasGr7 -----

TcasGr30 -----  
TcasGr29 -----  
AaegGr64f -----  
AaegGr64a3 -----  
AgamGr14 -----  
AgamGr18 -----  
AaegGr64d -----  
AgamGr17 -----  
AaegGr64c -----  
DmelGr64c -----  
DmelGr64d -----  
AgamGr20 -----  
AaegGr61a -----  
AgamGr21 -----  
AaegGr64a -----  
DmelGr64a -----  
DmelGr61a -----  
AgamGr15 -----  
AaegGr1 -----  
DmelGr5a -----  
DmelGr64f -----  
DmelGr64e -----  
AmelGr1 -----  
AmelGr2 -----  
AgamGr16 -----  
AaegGr64e -----  
TCasGr6 -----  
TcasGr26 -----  
TcasGr33 -----  
AgamGr23 -----  
AaegGr21a -----  
TcasGr10 -----  
TcasGr39 -----  
AgamGr22 -----  
AaegGr21b -----  
DmelGr21a -----  
AgamGr24 -----  
AaegGr63a -----  
DmelGr63a -----  
TcasGr3 -----  
DmelOr83b -----  
AgamOr7 -----  
HvirOr2 -----  
TcasOr16 -----  
TcasOr22 -----  
AmelOr2 -----  
TcasGr31 -----  
TcasGr35 -----  
DmelGr59c -----  
DmelGr92a -----  
DmelGr28a -----  
DmelGr64b -----  
TcasGr71 -----  
AgamGr19 -----  
AaegGr64b -----  
DmelGr93d -----  
TcasGr34 -----  
TcasGr43 -----  
TcasGr47 -----  
AmelGr3 -----  
AgamGr32b -----  
AgamGr50 -----  
TcasGr20 -----  
TcasGr79 -----  
TcasGr15 -----  
TcasGr60 -----  
AgamGr38 -----  
TcasGr51 -----  
DmelGr39b -----  
AgamGr28 -----



|           |                                                         |     |
|-----------|---------------------------------------------------------|-----|
| TcasGr61  | VCLVFTLTGPFPTFCNVLMEMWNIIPRENIDPIPLVVVLTHLIPFMLIHQ----- | 468 |
| TcasGr50  | -----                                                   |     |
| AgamGr12  | -----                                                   |     |
| AgamGr36  | -----                                                   |     |
| AgamGr48  | -----                                                   |     |
| AgamGr49a | -----                                                   |     |
| AgamGr49b | -----                                                   |     |
| DmelGr2a  | -----                                                   |     |
| DmelGr32a | -----                                                   |     |
| DmelGr68a | -----                                                   |     |
| AmelGr7   | -----                                                   |     |
| AmelGr8   | -----                                                   |     |
| AmelGr9   | -----                                                   |     |
| TcasGr57  | -----                                                   |     |
| TcasGr41  | -----                                                   |     |
| AgamGr34  | -----                                                   |     |
| AgamGr35  | -----                                                   |     |
| AgamGr39  | -----                                                   |     |
| AgamGr40  | -----                                                   |     |
| AaegGr28d | -----                                                   |     |
| AgamGr42  | -----                                                   |     |
| AgamGr41  | -----                                                   |     |
| AgamGr43  | -----                                                   |     |
| DmelGr33a | -----                                                   |     |
| AgamGr44  | -----                                                   |     |
| AgamGr13  | -----                                                   |     |
| AgamGr45  | -----                                                   |     |
| AgamGr46  | -----                                                   |     |
| Dmelr93a  | -----                                                   |     |
| AmelGr6   | -----                                                   |     |
| AmelGr10  | -----                                                   |     |
| TcasGr28  | -----                                                   |     |
| TcasGr40  | -----                                                   |     |
| AgamGr3   | -----                                                   |     |
| AgamGr4   | -----                                                   |     |
| AgamGr6   | -----                                                   |     |
| AgamGr7   | -----                                                   |     |
| AgamGr47  | -----                                                   |     |
| DmelGr8a  | -----                                                   |     |
| AgamGr5   | -----                                                   |     |
| AgamGr8   | -----                                                   |     |
| DmelGr9a  | -----                                                   |     |
| DmelGr59f | -----                                                   |     |
| DmelGr77a | -----                                                   |     |
| DmelGr85a | -----                                                   |     |
| TcasGr27  | -----                                                   |     |
| TcasGr48  | -----                                                   |     |
| AgamGr1   | -----                                                   |     |
| DmelGr10a | -----                                                   |     |
| DmelGr59e | -----                                                   |     |
| DmelGr10b | -----                                                   |     |
| DmelGr89a | -----                                                   |     |
| DmelGr57a | -----                                                   |     |
| DmelGr47b | -----                                                   |     |
| DmelGr58a | -----                                                   |     |
| DmelGr58b | -----                                                   |     |
| DmelGr98a | -----                                                   |     |
| AaegGr93a | -----                                                   |     |
| TcasGr19  | -----                                                   |     |
| DmelGr47a | -----                                                   |     |
| DmelGr58c | -----                                                   |     |
| TcasGr38  | -----KQIRFLNQY                                          | 223 |
| TcasGr46  | -----KQIRFLNQY                                          | 205 |
| TcasGr1   | -----KQLTKITVK                                          | 208 |
| TcasGr123 | -----KQINNLIIEY                                         | 206 |
| TcasGr62  | -----KQINNLIIEY                                         | 481 |
| TcasGr25  | -----FHD                                                | 103 |
| TcasGr59  | -----FHD                                                | 278 |

|            |                                                              |     |
|------------|--------------------------------------------------------------|-----|
| AgamGr2    | -----DAVGYGPAQ                                               | 227 |
| AaegGr66a  | -----AVF                                                     | 291 |
| DmelGr66a  | -----PLA                                                     | 305 |
| TcasGr11   | -----QDDKIPQISDNLYILCR---                                    | 235 |
| TcasGr55   | -----QDDKIPQISDNLYILCR---                                    | 235 |
| TcasGr21   | -----RTSVEGWTDVSNVKRKSKEI                                    | 244 |
| TcasGr56   | -----RTSVEGWTDVSNVKRKSKEI                                    | 244 |
| AaegGr     | -----DKRRLSFDEKQNEVKIVKIQ                                    | 244 |
| AaegGr28a  | -----DKVLLQFTN-QHVNEQVKIQ                                    | 139 |
| AgamGr33   | -----EKR-ISPQRRPSYWHAIKIQ                                    | 241 |
| DmelGr28bB | -----TRSLKAVNQKQRSLLQCLDSF                                   | 244 |
| DmelGr28bC | -----TRSLKAVNQKQRSLLQCLDSF                                   | 271 |
| DmelGr28bD | -----TRSLKAVNQKQRSLLQCLDSF                                   | 241 |
| DmelGr28bA | -----TRSLKAVNQKQRSLLQCLDSF                                   | 253 |
| DmelGr28bE | -----TRSLKAVNQKQRSLLQCLDSF                                   | 248 |
| AgamGr25   | -----SVGRTPRIEISSINLSDSKNDPIDVLRKCV                          | 274 |
| AaegGr43a  | -----                                                        |     |
| DmelGr43a  | -----ATSAIKPQKVSTVKNVSVNRPAMPALHASL                          | 250 |
| AgamGr37b  | -----MYFPTSPSAVGNP                                           | 223 |
| AgamGr37d  | -----MYFPTSPSAVGNP                                           | 219 |
| AgamGr37a  | -----MYFPTSPSAVGNP                                           | 233 |
| AgamGr37c  | -----MYFPTSPSAVGNP                                           | 227 |
| AgamGr37e  | -----MYFPTSPSAVGNP                                           | 227 |
| AgamGr37f  | -----ACRMYFPTSPSAVGNP                                        | 254 |
| AaegGr28c  | FAKLGIVKARILFHFICGFAFMLTIVVPIVQVILLVARFQALNNAFRMYFPTTPSCGGFL | 382 |
| AaegGr28b  | -----AQFVPPKKSSMVL                                           | 234 |
| AaegGr28e  | -----AHFVPPKKSSMVL                                           | 234 |
| TcasGr14   | -----VDLFVIFPLTKA                                            | 195 |
| TcasGr49   | -----VDLFVIFPLTKA                                            | 239 |
| AmelGr4    | -----MQNFYQNRLLDDF                                           | 223 |
| AmelGr5    | -----IQSFCRTRYDDI                                            | 223 |
| TcasGr16   | -----IQALINDSRKVT                                            | 218 |
| TcasGr22   | -----IITRGDVT                                                | 129 |
| TcasGr17   | -----IIDSIRQNS                                               | 205 |
| TcasGr150  | -----IIDSIRQNS                                               | 205 |
| TcasGr32   | -----KQL                                                     | 183 |
| TcasGr54   | -----KQL                                                     | 183 |
| TcasGr37   | -----ACL                                                     | 168 |
| TcasGr53   | -----ACL                                                     | 168 |
| TcasGr5    | -----YVM                                                     | 179 |
| TcasGr12   | -----RQT                                                     | 173 |
| TcasGr13   | -----RQT                                                     | 247 |
| TcasGr104  | -----NLF                                                     | 204 |
| TcasGr45   | -----NLF                                                     | 204 |
| TcasGr98   | -----EQM                                                     | 202 |
| TcasGr52   | -----KAL                                                     | 143 |
| TcasGr105  | -----KYL                                                     | 197 |
| TcasGr4    | -----                                                        |     |
| TcasGr44   | -----                                                        |     |
| AgamGr9a   | -----                                                        |     |
| AgamGr9c   | -----                                                        |     |
| AgamGr9b   | -----                                                        |     |
| AgamGr9d   | -----                                                        |     |
| AgamGr9e   | -----                                                        |     |
| AgamGr9f   | -----                                                        |     |
| AgamGr9g   | -----                                                        |     |
| AgamGr9i   | -----                                                        |     |
| AgamGr9h   | -----                                                        |     |
| AgamGr9j   | -----                                                        |     |
| AgamGr9l   | -----                                                        |     |
| AgamGr9k   | -----                                                        |     |
| AgamGr9m   | -----                                                        |     |
| AgamGr9n   | -----                                                        |     |
| AgamGr10   | -----                                                        |     |
| AgamGr11   | -----                                                        |     |
| DmelGr23aA | -----                                                        |     |
| DmelGr23aB | -----                                                        |     |
| DmelGr39aA | -----                                                        |     |
| DmelGr39aB | -----                                                        |     |
| DmelGr39aC | -----                                                        |     |

|            |                |     |
|------------|----------------|-----|
| DmelGr39aD | -----          |     |
| DmelGr98c  | -----          |     |
| DmelGr98d  | -----          |     |
| DmelGr98b  | -----          |     |
| AgamGr51   | -----          |     |
| AgamGr52   | -----          |     |
| DmelGr94a  | -----          |     |
| DmelGr97a  | -----          |     |
| DmelGr93b  | -----          |     |
| DmelGr93c  | -----          |     |
| DmelGr22d  | -----          |     |
| DmelGr22e  | -----          |     |
| DmelGr22a  | -----          |     |
| DmelGr22b  | -----          |     |
| DmelGr22c  | -----          |     |
| DmelGr22f  | -----          |     |
| DmelGr36a  | -----          |     |
| DmelGr36c  | -----          |     |
| DmelGr36b  | -----          |     |
| DmelGr59d  | -----          |     |
| DmelGr59a  | -----          |     |
| DmelGr59b  | -----          |     |
| AgamGr26   | -----          |     |
| AgamGr27   | -----          |     |
| AgamGr29   | -----          |     |
| AgamGr31   | -----          |     |
| AgamGr30   | -----          |     |
| AgamGr32a  | -----          |     |
| TcasGr2    | -----          |     |
| TcasGr9    | -----          |     |
| TcasGr7    | -----          |     |
| TcasGr30   | -----          |     |
| TcasGr29   | -----          |     |
| AaegGr64f  | -----          |     |
| AaegGr64a3 | -----          |     |
| AgamGr14   | -----          |     |
| AgamGr18   | -----          |     |
| AaegGr64d  | -----          |     |
| AgamGr17   | -----          |     |
| AaegGr64c  | -----          |     |
| DmelGr64c  | -----          |     |
| DmelGr64d  | -----          |     |
| AgamGr20   | -----          |     |
| AaegGr61a  | -----          |     |
| AgamGr21   | -----          |     |
| AaegGr64a  | -----          |     |
| DmelGr64a  | -----          |     |
| DmelGr61a  | -----          |     |
| AgamGr15   | -----          |     |
| AaegGr1    | -----          |     |
| DmelGr5a   | -----          |     |
| DmelGr64f  | -----          |     |
| DmelGr64e  | -----          |     |
| AmelGr1    | -----          |     |
| AmelGr2    | -----          |     |
| AgamGr16   | -----          |     |
| AaegGr64e  | -----          |     |
| TCasGr6    | -----ASNSKSTKV | 210 |
| TcasGr26   | -----ASNSKSTKV | 210 |
| TcasGr33   | -----ASNSKSTKV | 210 |
| AgamGr23   | -----          |     |
| AaegGr21a  | -----          |     |
| TcasGr10   | -----          |     |
| TcasGr39   | -----          |     |
| AgamGr22   | -----          |     |
| AaegGr21b  | -----          |     |
| DmelGr21a  | -----          |     |
| AgamGr24   | -----          |     |
| AaegGr63a  | -----          |     |
| DmelGr63a  | -----          |     |

|           |                                                                         |     |
|-----------|-------------------------------------------------------------------------|-----|
| TcasGr3   | -----                                                                   |     |
| DmelOr83b | -----NGLVNGAN-----                                                      | 322 |
| AgamOr7   | -----N-----                                                             | 314 |
| HvirOr2   | -----                                                                   |     |
| TcasOr16  | -----                                                                   |     |
| TcasOr22  | -----                                                                   |     |
| AmelOr2   | -----                                                                   |     |
| TcasGr31  | -----                                                                   |     |
| TcasGr35  | -----                                                                   |     |
| DmelGr59c | -----                                                                   |     |
| DmelGr92a | -----                                                                   |     |
| DmelGr28a | -----HRLRNLI-----                                                       | 248 |
| DmelGr64b | -----                                                                   |     |
| TcasGr71  | -----                                                                   |     |
| AgamGr19  | -----                                                                   |     |
| AaegGr64b | -----                                                                   |     |
| DmelGr93d | -----                                                                   |     |
| TcasGr34  | -----                                                                   |     |
| TcasGr43  | -----                                                                   |     |
| TcasGr47  | -----                                                                   |     |
| AmelGr3   | -----LKPQRQI-----                                                       | 267 |
| AgamGr32b | -----                                                                   |     |
| AgamGr50  | -----                                                                   |     |
| TcasGr20  | -----                                                                   |     |
| TcasGr79  | -----                                                                   |     |
| TcasGr15  | -----                                                                   |     |
| TcasGr60  | -----                                                                   |     |
| AgamGr38  | -----                                                                   |     |
| TcasGr51  | -----FITKQLIFMIFVTTYQLYCWSSFLKISVLQSLWASPTCDLMYEFQIFTFLLMSLLQSIKRR----- | 591 |
| DmelGr39b | -----                                                                   |     |
| AgamGr28  | -----                                                                   |     |
| TcasGr61  | -----ETQFVVANIILRRRFALINSILRK-----                                      | 492 |
| TcasGr50  | -----                                                                   |     |
| AgamGr12  | -----                                                                   |     |
| AgamGr36  | -----                                                                   |     |
| AgamGr48  | -----                                                                   |     |
| AgamGr49a | -----                                                                   |     |
| AgamGr49b | -----                                                                   |     |
| DmelGr2a  | -----                                                                   |     |
| DmelGr32a | -----                                                                   |     |
| DmelGr68a | -----                                                                   |     |
| AmelGr7   | -----                                                                   |     |
| AmelGr8   | -----                                                                   |     |
| AmelGr9   | -----                                                                   |     |
| TcasGr57  | -----                                                                   |     |
| TcasGr41  | -----                                                                   |     |
| AgamGr34  | -----KKMS-----                                                          | 231 |
| AgamGr35  | -----                                                                   |     |
| AgamGr39  | -----                                                                   |     |
| AgamGr40  | -----                                                                   |     |
| AaegGr28d | -----                                                                   |     |
| AgamGr42  | -----I-----                                                             | 237 |
| AgamGr41  | -----DF-----                                                            | 239 |
| AgamGr43  | -----                                                                   |     |
| DmelGr33a | -----                                                                   |     |
| AgamGr44  | -----                                                                   |     |
| AgamGr13  | -----                                                                   |     |
| AgamGr45  | -----                                                                   |     |
| AgamGr46  | -----TD-----                                                            | 246 |
| Dmelr93a  | -----                                                                   |     |
| AmelGr6   | -----                                                                   |     |
| AmelGr10  | -----                                                                   |     |
| TcasGr28  | -----                                                                   |     |
| TcasGr40  | -----                                                                   |     |
| AgamGr3   | -----                                                                   |     |
| AgamGr4   | -----                                                                   |     |
| AgamGr6   | -----                                                                   |     |
| AgamGr7   | -----                                                                   |     |
| AgamGr47  | -----                                                                   |     |
| DmelGr8a  | -----                                                                   |     |

AgamGr5 -----  
 AgamGr8 -----  
 DmelGr9a -----  
 DmelGr59f -----  
 DmelGr77a -----Q 265  
 DmelGr85a -----  
 TcasGr27 -----  
 TcasGr48 -----  
 AgamGr1 -----  
 DmelGr10a -----  
 DmelGr59e -----  
 DmelGr10b -----  
 DmelGr89a -----  
 DmelGr57a -----  
 DmelGr47b -----  
 DmelGr58a -----  
 DmelGr58b -----  
 DmelGr98a -----  
 AaegGr93a -----  
 TcasGr19 -----  
 DmelGr47a -----  
 DmelGr58c -----  
  
 TcasGr38 LRLKPEGRISNR---RVFISFSKICYLHQHLSKSVKLFNEVFGV--SLLVLFGNSFLSIV 278  
 TcasGr46 LRLKPEGRISNR---RVFISFSKICYLHQHLSKSVKLFNEVFGV--SLLVLFGNSFLSIV 260  
 TcasGr1 N-----FATK---TQSAVLGKICTLHHHLSKLVTRFNEIFGL--GLLLMFAVSFLIIT 256  
 TcasGr123 FQKNKIGPVETKGTNKQLNLTNLKICALHHHLSKLVKLFNETFGI--VLLLMFVGSFVVIV 264  
 TcasGr62 FQKNKIGPVETKGTNKQLNLTNLKICALHHHLSKLVKLFNETFGI--VLLLMFVGSFVVIV 539  
 TcasGr25 IFLPLLCILT-----NTLEILITVTVCELTILEYKRTKKLLY--RIPVTKTDSMLIRN 154  
 TcasGr59 IFLPLLCILT-----NTLEILITVTVCELTILEYKRTKKLLY--RIPVTKTDSMLIRN 329  
 AgamGr2 EFLPTDRRLRPHIEQRLDNKILIFCRTHDELCEIGKVVNRMYSV--QMLVAMAHGFVAIT 285  
 AaegGr66a EFLAFDKYMK--IDEKLDKMLICRTHDELCEIGKSVNYMFSF--QMLVSMAGFMAIT 347  
 DmelGr66a TNMVHESELG--NAAKVEEKLNNLCQVHDEICEIGKALNELWSY--PILSLMAYGFLIFT 361  
 TcasGr11 -----LHYKLTSMVMQKINSASFV--QLLVSIGVSLFDVL 267  
 TcasGr55 -----LHYKLTSMVMQKINSASFV--QLLVSIGVSLFDVL 267  
 TcasGr21 SKLPKSM LAIS----DPVFIVDQVAALHIKLTDTAHMINYAFCV--QQLLRITVAFISIV 298  
 TcasGr56 SKLPKSM LAIS----DPVFIVDQVAALHIKLTDTAHMINYAFCV--QQLLRITVAFISIV 298  
 AaegGr KPLNISSVFSN-TNRYMPDVINQVASIQSEISDACDHVEDYFKV--QMLTIVTISFLISV 301  
 AaegGr28a NPFGVSSVFSVKTNRQMPNVINRVASIQSEICDACDCVEDYFKV--QMLTIVTISFLISV 197  
 AgamGr33 RPLGIASVYSN-NDKSMPPDVSTVAEIQDALCEACSYAEDYFTI--QMLTIVTIVFLIIV 298  
 DmelGr28bB SMYTIVTKDPA-----EIIQESMEIHHLICEAAATANKYFTY--QLLTIISIAFLIIV 295  
 DmelGr28bC SMYTIVTKDPA-----EIIQESMEIHHLICEAAATANKYFTY--QLLTIISIAFLIIV 322  
 DmelGr28bD SMYTIVTKDPA-----EIIQESMEIHHLICEAAATANKYFTY--QLLTIISIAFLIIV 292  
 DmelGr28bA SMYTIVTKDPA-----EIIQESMEIHHLICEAAATANKYFTY--QLLTIISIAFLIIV 304  
 DmelGr28bE SMYTIVTKDPA-----EIIQESMEIHHLICEAAATANKYFTY--QLLTIISIAFLIIV 299  
 AgamGr25 ANVAHGFDKRTLSRK--IIEDLAVIHASLSYCVLVSKTFTGI--ALLAVLGSCLLHLV 330  
 AaegGr43a -----KRTTIPPNR--IIEDLAYIHASLSTGVVLSNTFTGV--ALLAVLGSCLLHLV 270  
 DmelGr43a TKLNGETLPSEAAAKNKGLLKLADSHESLGCVHLLSNSFGI--AVLFILVSCLLHLV 308  
 AgamGr37b S-----EFAICS-EKEQINVLKQIKILHDKLNDVVELVNYCFVS--Q GK-RIGILVHKAI 274  
 AgamGr37d S-----EFAICS-EKEQINVLKQIKILHDKLNDVVELVNYCFVS--Q GK-RIGILVHKAI 270  
 AgamGr37a S-----EFAICS-EKEQINVLKQIKILHDKLNDVVELVNYCFVS--Q GK-RIGILVHKAI 284  
 AgamGr37c S-----EFAICS-EKEQINVLKQIKILHDKLNDVVELVNYCFVS--Q GK-RIGILVHKAI 278  
 AgamGr37e S-----EFAICS-EKEQINVLKQIKILHDKLNDVVELVNYCFVS--Q GK-RIGILVHKAI 278  
 AgamGr37f S-----EFAICS-EKEQINVLKQIKILHDKLNDVVELVNYCFVS--Q GK-RIGILVHKAI 305  
 AaegGr28c SSTSHTEVICN-EKEQLAVLQKIKILHDKLNDVVELVNYCFVS--QITFCVGLCFVIGV 439  
 AaegGr28b D-----ELPVPKSNYKSVVLHQIQLQWTEICQVVELISKTYR--QIIFIATASTIMST 287  
 AaegGr28e D-----ELPVPKSNYKSVVLHQIQLQWTEISQVVELISKTYR--QIIFIATASTIMST 287  
 TcasGr14 EKVRNLKEDEVTFVSVQKIQ---ELSHLHYKLANFTVKISGLFEI--TTITAMVMWFGYVI 250  
 TcasGr49 EKVRNLKEDEVTFVSVQKIQ---ELSHLHYKLANFTVKISGLFEI--TTITAMVMWFGYVI 294  
 AmelGr4 NSNIIYQNRRIFLNCSRIHLLLQIRNIHDHLCNISREISQFYAF--PTLTGLCFIFFTSL 281  
 AmelGr5 NFKILNQTRCVFMSYSKIQLFIQIRDIYDHLCDISREVSDFYSF--SILTALSFI FLVIL 281  
 TcasGr16 RFPTELTFCKNIK-----HLVNLHKNLVKAKDHNSLYSL--HLLLWITVTFILLV 267  
 TcasGr22 -----STTIK-----KLFNLHKILVKVREINGIFAF--QVLMCTSMNFVLLI 170  
 TcasGr17 QTRNQAVPTGTIK-----TLVQMHSNLVTTSEEVCDSFSI--FGLVWISLIFVVLV 254  
 TcasGr150 QTRNQAVPTGTIK-----TLVQMHSNLVTTSEEVCDSFSI--FGLVWISLIFVVLV 254  
 TcasGr32 RFKLRFFEKLGNRRLGFVQRLDQIQFDICLLKEGVLDVNDIFGW--QILFLITYATLQIL 241  
 TcasGr54 RFKLRFFEKLGNRRLGFVQRLDQIQFDICLLKEGVLDVNDIFGW--QILFLITYATLQIL 241  
 TcasGr37 -----MEEKRP--MVS LQVIKAQIYSLRETVDVFNDIFGW--PFLLLITFTSLQIM 215  
 TcasGr53 -----MEEKRP--MVS LQVIKAQIYSLRETVDVFNDIFGW--PFLLLITFTSLQIM 215

TcasGr5 T-----GQLKAQNSNLLKSVCADLCLLSECVDLFNSLFGF--LVLLLVALTTLQLL 228  
TcasGr12 -----LDTADVKTLLTTVVEKECEYKMKVTIDAFNDIFGW--SFLFLTLYSSLLLL 220  
TcasGr13 -----LDTADVKTLLTTVVEKECEYKMKVTIDAFNDIFGW--SFLFLTLYSSLLLL 294  
TcasGr104 RIE-----ESEEKNIIVSLRQIGSLSQLLSETVALFNDVFGT--CLILITGKSIVQLL 255  
TcasGr45 RIE-----ESEEKNIIVSLRQIGSLSQLLSETVALFNDVFGT--CLILITGKSIVQLL 255  
TcasGr98 AVR-----INP-KNCASFVIEVRKLSRLLGEMVGLFNDIFGW--PLVFITGRFVIKIL 252  
TcasGr52 ES-----SKISVGLIRD TAVLYRLLADNVANFNKIFGW--SLIFLFGRIVLQLL 190  
TcasGr105 KIE-----TS-----CRYVGTLYRILTTMMEMVNDIFGW--TLILILAKCITSSL 240  
TcasGr4 -----EIHFDLCQAADDLN-RYFEV--QVLTIFGVSFYFFI 239  
TcasGr44 -----EIHFDLCQAADDLN-RYFEV--QVLTIFGVSFYFFI 243  
AgamGr9a -----TYVTTYNSIAAVLGDHLCSYFGP--LVLLHCSYFCLEAA 257  
AgamGr9c -----TYVSMYNSITNVLRRNLTYPYFGP--IILLHSSYVCLEAA 254  
AgamGr9b -----FYGTMYCKIAVVLSDHLGYPYFGL--IILMHCSYVCFEAA 306  
AgamGr9d -----RYGVIHNR TAF AIRNHL SHYFGP--MLAVFCTVVSLEVA 261  
AgamGr9e -----VFCKTYERVCRAVAR SFF EY TGP--VIATFCTLVMFEFS 253  
AgamGr9f -----LFCRTYDRVCTRVAQPFY EY CGP--VVATFCPLLI FEFS 250  
AgamGr9g -----PLWQVYDRVTIDVRKDL S QY YGP--IVLLFSCMIGLESA 258  
AgamGr9i -----ILWQVYDRVTIHVRKDL S QY CGP--IVVLTSLFVLECA 258  
AgamGr9h -----MYFKLIDRITVLI NFHLSQI YGS--FVVPHCMYVLFESA 258  
AgamGr9j -----VFLDRFQRYLLID-SVNKCF SV--PVTHTL L L L I V L E R T 291  
AgamGr9l -----LFIKRFEYYELIE-CINRCFAI--PLIHVLL L I L L E R T 281  
AgamGr9k -----LFMAKFER YV M L I E - Q I N R C F S L -- P I V T M L A L G M V E L A 271  
AgamGr9m -----LFLERFRQYIAQIE-RINQCLSA--PLLGMLLQALIELA 274  
AgamGr9n -----YFLHRYDRYSRLIG-EVDDCYSF--PVVLVLLLVMLQLI 242  
AgamGr10 -----YFLHRYDRYSRQIG-EVDDCYSF--PVVLVLLLVMLQLI 242  
AgamGr11 -----YFVERFELYASQLR-QIDQCFSM--PLTMIVLLVLIEMV 244  
DmelGr23aA -----TLRTTYERIFECYETFSDCYGW--GMLGLHLLT S F Q F V 244  
DmelGr23aB -----DLKRRYNDLH Y L F V R I N G Y F G G -- S L L T I I I V H F A I F V 247  
DmelGr39aA -----VAGCLRTHDEI L L L G Q R E L I A V Y G G -- V I L F L F I Y Q W M Q C I 250  
DmelGr39aB -----LRLRVCLEMHDRLMLLCNDEISLVYGF--IAWLSWFMASLDVT 257  
DmelGr39aC -----NFCKYNQV I W L S Y T E I N H C F G L -- L L L L V T G L I L L I T P 251  
DmelGr39aD -----Q Q I L K L C G G E L N E C F G L -- L M L P I V A L V L L M A P 242  
DmelGr98c -----CVTLKQNQLLIGRIWRLVDEIGAYFRW--SMTLLFLYNGLTIL 274  
DmelGr98d -----CVALKRNQLLAGRIWGLVNEVSLYFTL--SLTLLFLYNELTIL 272  
DmelGr98b -----CVALKRNQLLGR IWRLEGDVGSYFTP--TMLLLFLYNGLTIL 272  
AgamGr51 -----PSVLQLYMLHCKNEDMVKQFM-ETLNF--PTLMLTGWYFFMIV 285  
AgamGr52 -----STIREVYMWHCEN AQLEKQFM-AIMDL--PVLLNGWYFFMIV 277  
DmelGr94a -----YRMQRFCALADELDQLAYRYR-LIYVH--SGKYLT P M S L S M I L 265  
DmelGr97a -----YRMRRFCELADL L D E L A R K Y G - F T A S R -- S K N Y L R F T D W S M V L 286  
DmelGr93b -----NNPQPTRQAI SNL D K C L Y L Y D - E I H Q V -- S R S F Q Q L F D L P L F L 276  
DmelGr93c -----GRKQ-LRIVEYRVDECISVYD-EIERV--GRTFHRLLELPVLI 269  
DmelGr22d -----VRFLKLYNKL V N L Y S K L A - D C Y D C -- Q T V L M M A I F L A A N I 264  
DmelGr22e -----MDLLLYLYHRLLDLGQRLA-SIYDY--QMVMVMSFLIANV 267  
DmelGr22a -----IQLLLWLVYSRLLDLNHRLT-AIYDI--QVTLFMATLFSVNI 266  
DmelGr22b -----IHQFLSLYKR L L E L N R K L V - I A Y E Y -- Q M T L F I I A Q L S G N I 265  
DmelGr22c -----IRKYL S L Y R R L L E L K G Y M V - A T Y E Y -- H M T L V L T T G L A S N F 262  
DmelGr22f -----IHALASLYDRLLKLSLVV-ACNDL--QLILMLI I Y L I G N T 258  
DmelGr36a -----CCYLADRIDNIAKLQNLQSI V T Q L N - Q V F G I -- Q G I M V Y G G Y I F S V 265  
DmelGr36c -----CCSLADQIENIARIQS Q L Q T I M N Q M E - E V F G I -- Q G A M T Y G G Y L S S V 265  
DmelGr36b -----CCYLSQLEDIGEVQS Q S M V G Q L D - E V F G M -- Q G L M A Y S E Y L S I V 265  
DmelGr59d -----CCYLADRLERIAKS Q S D L Q E L V E N L S - T A Y E G -- E V V C L V I T Y Y L N M L 264  
DmelGr59a -----LRGLWALHRNLSYTARRIN-KHYGP--QMLAMRFDYFIFSI 251  
DmelGr59b -----LQHLWLLHACLTKTALNIN-KIYAP--QMLASRFDNFVNGV 252  
AgamGr26 -----LPAGALYDYAHLIDLLRRTHLRLAQLLEQAN-GCFGV--LIVFTTTASFVVL S 293  
AgamGr27 -----KVRDCAELVETLRRLTHLKLGDLTGRVV-GRFGP--LIVCTVLS S F V V L N 273  
AgamGr29 -----TPVRLTRDDRTIEKIRLLQLQLLQIVRRTNGGEYGR--LVIMILLATFIYLN 291  
AgamGr31 -----TPVRFTRDDEQTEKIRLLQLKLVQIVFHTNGGEYGL--LLIVVLLTTFIFLN 292  
AgamGr30 -----RKSNTKENDITIDKLVRLHTALLHLTWKTN-AHYGV--LLLIIMLYSFIQIS 285  
AgamGr32a -----KERVTSPLDVATIVRLSTMHMMLRLARAAN-KHFGV--LMLIIVLSTFIQIN 297  
TcasGr2 --RRIA AVASEKIKNEI--IWKKLREYTRQRLVRKV D K E I A Y -- I V L L T F A S D L L F I L 301  
TcasGr9 --RRIA AVASEKVTSEK--SWIALNDYNR L C H L C F L L D E K L S Y -- I I L T S F L N N F Y F I I 301  
TcasGr7 --DRTQSMSESKNKSES--AWKNLREDYNRLCRLCKRVDEEISY--IVLMSFASDLLFIL 303  
TcasGr30 --DRTQSMSESKNKSES--AWKNLREDYNRLCRLCKRVDEEISY--IVLMSFASDLLFIL 303  
TcasGr29 --DRTQSMSESKNKSES--AWKNLREDYNRLCRLCKRVDEEISY--IVLMSFASDLLFIL 303  
AaegGr64f --DRIRTFNGNQPEE---VWRTLRLDFLRLSELVTYLDTKLSR--IILLSCASDMFFIS 260  
AaegGr64a3 --DRIRTFNGNQPEE---VWRTLRLDFLRLSELVTYLDTKLSR--IILLSCASDMFFIS 260  
AgamGr14 --ERLERLDGQPQSQG---VWRALRLDYVRLSELVTFVDERFSK--LILFCCANDMFFIT 324  
AgamGr18 --RRLVAVQGIACPTN---FWHDVRMDYVAVSELVQVLD A Q F G H -- L I L L A C A N D M Y F I A 296  
AaegGr64d --QRLVSVEGTHYPTT---FWREIRTDYVAVSQLVAF L D E Q F G H -- L I L L S C A N D M Y F I A 328  
AgamGr17 --RHAAQYKGRHVMGP---VWQRLRLDYGRISSLVAYMEGIMAP--IIVCTTASDLYFIF 285

AaegGr64c --HRIEHLKGMPLPES---FWAEIRLDYTKISNLVIYMDGVLSLSP--MIMITSASNIFFIT 310  
 DmelGr64c --WRIRQHVRQMPNE---FWQIRIRCDLLDLSLLGIYDKELSG--LIVLSCAHNMYFVC 289  
 DmelGr64d --WRIRQNLGKPMKE---FWQEIIRSDFLDLSLLKLYDKELSG--LILVCCAHNMYFIC 298  
 AgamGr20 --KRID-SNLQNG---SEAFWGEIMRTHFVGLIELVERTNRIVGP--LLIASCANDMYFLC 316  
 AaegGr61a --IRIS-ERISQRKGTTEDFWEQIRIQYVSLCDLVVLLNRSINR--LVFVSYANDLYFIC 313  
 AgamGr21 --NYLKILSDG-VLIPGEDFWIRVRTNYVAVCELDLDDVDRAISW--TMLISCATNLYYIC 341  
 AaegGr64a --THLRTLGGGVLPINPEFWIRVRYTHYVSLCELLDEVDQAVAW--IVLISCATNLYFIC 224  
 DmelGr64a --TRIRKLEHEEVCE---VFIQIREHYVKMCELLEFVDSAMSS--LILLSVCNNLYFVC 335  
 DmelGr61a --ARVGALEGRHVPEA---LWYDIRRDHIRLCELASLVEASMSN--IVFVSCANNVYVIC 318  
 AgamGr15 --SFVQEQMLRQKMTEQ--FWGQQRQKYRNVCDLVTTVDDHISA--ITMLSISNNLFFIC 322  
 AaegGr1 --NHLMNHK-REKMTQ--FWGQQRQYRNICDLVRFVDDAISI--ITMLSISNNLFFIC 326  
 DmelGr5a --RSLEQQV-RQPMPEA--YWTWSRTLYRSIVELIREVDDAVSG--IMLISFGSNLYFIC 322  
 DmelGr64f --DDLRFNK-GMNMAPS--YWSERRIQYRNICILCDKMDDAISL--ITMVSFSNNLYFIC 347  
 DmelGr64e --DYMMEA-RLPTTVD--YWMQCRINFRNLCKLCEEVDDAIST--ITLLCFNNLYFIC 341  
 AmelGr1 --SRLYSIR-GKAMPEW--WWEARSDYNHLATLTRQLDISHISI--MVLFSFATDLYFIC 270  
 AmelGr2 --KKLAVTM-TKQAAF--NWRELREHYAILSCIVKKVDDHISP--IILLSFANNVYFIC 358  
 AgamGr16 --DAVIASSE-KLYHRGI--FWKDQYTHYRRLVGLIRHVNNHIGV--FIVISYASNLFYIC 295  
 AaegGr64e --EIIILNSK-AQYHSDT--FWHDQYRKHHRVCLNVHIVGQNVAY--LVVISFANNMFFIC 313  
 TCasGr6 LFKDVDNRNCSAYIIAHYRVLWLSLSDLLQKMGNAARTYSTYSL--FMMANITVAVYGFT 268  
 TCasGr26 LFKDVDNRNCSAYIIAHYRVLWLSLSDLLQKMGNAARTYSTYSL--FMMANITVAVYGFT 268  
 TCasGr33 LFKDVDNRNCSAYIIAHYRVLWLSLSDLLQKMGNAARTYSTYSL--FMMANITVAVYGFT 268  
 AgamGr23 --QDVAIECTAAMISRYRFLWLNLSSELLQALGNAYARTYSTYCL--FMFVNITVAIYGAL 352  
 AaegGr21a --KDVAIECTAAMISQYRFLWLNLSSELLQALGNAYARTYSTYCL--FMFANITVAIYGAL 344  
 TCasGr10 --KALESRNPAKILGAYRDLWVDSLHMMQQLGKAYSGLMYSMYCL--LILLTTIVASYGSV 300  
 TCasGr39 --KALESRNPAKILGAYRDLWVDSLHMMQQLGKAYSGLMYSMYCL--LILLTTIVASYGSV 300  
 AgamGr22 --DVLATERPAAKLETEYRHLWVDSLHMMQQLGKAYSGLMYGIYCL--VIFFTTIIATYGSL 325  
 AaegGr21b --NILATEQPADKLETEYRHLWVDSLHMMQQLGKAYSGLMYGIYCL--VIFFTTIIATYGAL 325  
 DmelGr21a --TTIRGEKPAQKLETEYRHLWVDSLHMMQQLGRAYSGLMYGMYCL--VIFFTTIIATYGSI 326  
 AgamGr24 --RALRHVGPAAKVSEYRSLWLRLSKLARDTGFSTCYTFTFICL--YLFIIITLSIYGLM 251  
 AaegGr63a --RALRHVGPAAKVSEYRSLWLRLSKLARDTGSSTCYTFTFICL--YLFIIITLSIYGLM 316  
 DmelGr63a --KALKHIGPAAMVADYRVLWLRSLKLRDTRTGNALCYTFVFMSL--YLFIIITLSIYGLM 345  
 TCasGr3 --MALKHVGPSSQVADYRSLWMLSLKLRDTRTGNALCYTFVFMSL--YLFIIITLSIYGLM 307  
 DmelOr83b --PNGLTKKQEMMVRSAIKYWVERHKKHVRLVVAIGDYGALL--LHMLTSTIKLTLLA 378  
 AgamOr7 --PNGLTRKQEMMVRSAIKYWVERHKKHVRLVVAIGDYGALL--LHMLTSTIKLTLLA 370  
 HvirOr2 --PNGLTPKQEMMVRSAIKYWVERHKKHVRLVVAIGDYGALL--FHMLVSTITLTLA 364  
 TCasOr16 --PNGLTKKQELMVRSAIKYWVERHKKHVRLVVAIGDAYGVAL--LHMLTSTIMLTLA 466  
 TCasOr22 --PNGLTKKQELMVRSAIKYWVERHKKHVRLVVAIGDAYGVAL--LHMLTSTIMLTLA 505  
 AmelOr2 --PNGLTKKQEMMVRSAIKYWVERHKKHVRLVVAIGDAYGVAL--LHMLTSTITLTLA 370  
 TCasGr31 -----TALWKQLRYEHYRQLSVLIDNNSY--IIIVSFATNLYFII 178  
 TCasGr35 -----VFIFDNVWFLWVWILSTIFLCL--DTILKKVDDILSQA 186  
 DmelGr59c -----GGVYSIQCCSLADQLDLIAERHYFLKDRLEMSDLFQI--QSLSMSLVYFFSTM 269  
 DmelGr92a -----TSGSKQKIRRVRNLEKICISLYREIYHT--SIMFHKLFVPLFL 263  
 DmelGr28a STPMKRYSVTSVIRLNPEYAIKQVSNHNLCDICQTIIEYFTY--PLLGIIAISFLFIL 306  
 DmelGr64b -----IAAVHRKVMVAVFWTEYVREHYLALKRLVHLLDAAIAP--LVLLAFGNMFFIC 282  
 TCasGr71 -----MEGLVCSIKELNMIFNEFFGW--PIIMIIYSSLMVL 228  
 AgamGr19 -----IQFYTTVQVVAREKFWSEIHSDYVMVCELLEHVMSICSP--LLVSCGTNLYLIC 277  
 AaegGr64b -----IEVACNGTVLPTESFVVEIREHYVISEFVLVHVKMYS--LVLSGCCNDVFLIC 226  
 DmelGr93d -----VQKSMALFKEISSVVTSLQDIFNV--HLFSLALLTLLQVL 262  
 TCasGr34 -----KIESLACELKNTVDDFNDIFGI--SFLIIISYSTLHFV 216  
 TCasGr43 -----HLFLVRRTEFLAQILNQTVNFYNSAFGW--PIAFLIFVATLDFL 234  
 TCasGr47 -----YETVAHGMTVQKTTLFFNRTFGV--PIFLVLFVQMOSV 210  
 AmelGr3 VLGSYRLSRKLDENKMYVNNISELIMVHSSLCDAVSLINSTFGV--VILAVTVTCLLHLV 325  
 AgamGr32b -----VLGESLKMESSRLDQLEQLRLLHVRTVQTAGSLSEKFGI--VIIIVIAAFASVN 296  
 AgamGr50 -----SKAPNEIVRLYLMHTEASLVVQSIVEVISI--PILLSVWYFFIIV 256  
 TCasGr20 -----PKVIQGSALSAYERLNEFMRLVEEIEDVIEAINGFYGV--HTLLILFSCLLHLV 283  
 TCasGr79 -----LKNCVIYFNRIFGWNILFGHIFTV--CRTLIYIDNVKGL 238  
 TCasGr15 DIFGWTILQTVFFTVPRVLMYDFIFITEHESKPNWFLFLANFLT--NLLFWFQIVNVA 266  
 TCasGr60 -----IKLSNDKLEITACRLFKIDNSLIL--DLLVFITINVVLL 229  
 AgamGr38 --DVADPPALTVYDPKQTLILRQIMQIFDKISDLADKGSYYYGI--QIMVSIAGSFVYLM 275  
 TCasGr51 YVLLNEKVEAIKTSPKMRHELQKLAQVYRILGETIETWNKLFY--QILLITFQSGLN 649  
 DmelGr39b -----CTLDGNANRLCSLEFLALQKSHMQLHLYLFTFNDLFGW--SILGTYVVLFS 249  
 AgamGr28 -----AVRLQEKIHLYLQDLHCVQLMTRSYEV--AIVTNVFLAINVTS 256  
 TCasGr61 LYKNKYRKLIVDGKSEEQIVDICRSHDKLCDVCDVNRIFGF--IIIIGLQFNTIV 550  
 TCasGr50 -----HFLALLDIVGHVHNELCNLCQVANSIYGF--QNFLVLTFSFICI 248  
 AgamGr12 -----VYTARQWCLIVDRYGAAVNLVNEINHIFSE--LLLVMVQVQVQLC 251  
 AgamGr36 -----QKQRWGRVDPVDVSELAEDFAALVDVDRVNRISY--QIIALITGVGMFSI 274  
 AgamGr48 --YWSRRVRVQQICCDASDTIDRLCTLHQLTEIVRAIVSIFQL--PVLLMNLQFIVIV 276  
 AgamGr49a -----AFLYRLINERVRTVIGSLLQLDDTRQVRDSATG--RERRFICNHIYQL 289  
 AgamGr49b -----RQISTYEALKSVQRNHLVSSNVKSF IHLQRSTDTVSNK--LIVISFRYNAPTQI 279  
 DmelGr2a -----VLEEQEDLEEAAMDRLIAVRLVYQRVWALVALLNRCYGL--SMLMQVGNDFLAIT 282

DmelGr32a ----VNPVNPALMEHFPEDSLFIYRMHNKLLRIYKGINDCCNL--ILVSFLGYSFYTVT 331  
DmelGr68a -----WRELSNLIIEVLCKFRYITENINCVAGV--SLLFYFGFSFYTVT 257  
AmelGr7 FENNRFLYRNEHVRNNTIRAVKQIHLEIKIVSFLNQTFGI--QILIQMVTSVVFTT 280  
AmelGr8 -----KNPILLMELRLIKKQYTELIEAVQLLNHSYSL--KNEMILLMLFVDIT 275  
AmelGr9 -----SLLLIKHLKHEEKHLEISDVVQLVNDTFII--HIVLVITTFSTIT 267  
TcasGr57 -----AKTPPNKLNICYDLRRVRKNYNSICELVDAFNNIYGL--AMLEIIIVVITYVL 256  
TcasGr41 -----DIVKEHQNLHNKICNLIDEFNECFGL--QILGILFVGVITYT 246  
AgamGr34 LHVIEVHGCGIDAANLKLHLQPKVLYRYNDLYDICKLLDRYFGL--LFLLTFTSIFIVTT 289  
AgamGr35 ----AVGEEELHSVGRREISDDLQVLAIVSRTIDLGQKIESYFGP--LFLTvyTALFSVTT 312  
AgamGr39 ----SGSNKQLYPLSENETIKTIAMIYMKLGTAVQVYNRCFFI--HIFYIIASAFGLNL 294  
AgamGr40 ----YKHSNSSVTEVGGIVRCIGDIHERLSETIVDFNYCFAL--QILLMMASAFGYTL 267  
AaegGr28d -----RIPRTSRQTCQVQRASLHDLSDTVELFNECYT--QVVHALTAAFNFTI 273  
AgamGr42 CFVEKHSGEQAASYRVLNMHIQGFTAIYSNLCDIAGIFCTIFAW--QPMMFCASLIVTVV 295  
AgamGr41 LRKSITSDRLEDDLGSVLQLIKTLMLRHLKLSDISTNCSQCFCFVSVGTSVWVKSCFAYYT 299  
AgamGr43 -----PFVQEHELISGERLTYMFVIHENVAKLAEFINGAYST--QIIAIVTVTFVNTL 290  
DmelGr33a --FDYDNATIAENTGNTSEANLPDLFKLHDKILALSUITNGEFGP--QCVPYMAACFVVS I 336  
AgamGr44 --GLVDRARGYARLQHAVYVRSKLNYLADARCRIVACCTETHNLYQQMLLSCSFCMFTY 276  
AgamGr13 -----SVQKILPYYSLSVALYLLILFQELMSKVHISGESWLQFLITYRFTNFF 278  
AgamGr45 --WLLQLLPHLGRGSEAAYESVRHLVRIHQGLLKAIGLLNCCFGVQNTILLLYQFVTLVEL 308  
AgamGr46 EEQAHYERFRDAPKPPDRGETVSTTLEMLWLGQWATPAELLPWFWEVLSTLSWAFISTF 306  
DmelGr93a ERYRMTKYRRMQLLCDFADELDECAAISYSELYHVNTSFRRIILQW--QILFYIYLNFINIC 290  
AmelGr6 -----RQKTIQDLHNDLMLSSETLGSLSYSW--LLFWLGNLSIHSV 307  
AmelGr10 -----SIRHSTLQQIWWLHCLANATEIINSVYAIQLLFWISSMSFNLMRS 250  
TcasGr28 -----SVMITLALGNPYCFNS--SVYKVPVEHLLFI 200  
TcasGr40 -----LTFSWYSKVFYSKIIISGSIFMTTTSFYRILNSGYNLTT 261  
AgamGr3 -----ERLEEYRALYGEWQINEGINELFGFS--QACNIASSFAQMA 261  
AgamGr4 -----AMYAQSVDRLSLKSVYQGLWELSDCINRNFGWS--QICNFTGNFVQLS 297  
AgamGr6 -----RAISPEAIHRRVLHLKAMQNLKDLTGEVSDRFGW--QLFAVITMLFICTT 291  
AgamGr7 ---PVSIGATSQVDRVPLRRMFVVKGYTLTLWHASKDLNGCCVY--SQLANLQNFIQCT 300  
AgamGr47 -----METILKTVNRLSVLHYLHCDAIRLVNRISLS--LMFHFAGAMFVFLV 277  
DmelGr8a -----SFPGFESFLRRRLVQKQRIYSHVYDMLKCFQGAFFNS--ILAVLLTINIRIA 263  
AgamGr5 -----SMRYMEFLAGLKNALKALYSDFQASVALNEAYGR--TYLIIYCKNYIHIL 309  
AgamGr8 -----GQICGYLRKLMEGFARVERLLELLNQAFGY--SLAIKLNINNIYIL 249  
DmelGr9a -----DYKTLRLDYAHLAKVTRSLSHLFGLSLLLLNVLCLGDWIIIV 222  
DmelGr59f -----RISEVQKIRMHANLIDFTKAVNRTFQY--SILLFVGCFLNFN 273  
DmelGr77a ELYKGGQKWLALLELWRLHVVHQLLKLHRSICSLCAVQAVCFGL--FVPLECTIHLFFTY 323  
DmelGr85a -----LWEIERLHTRFQCLIDLTSVCSIFRY--VTLAYMARNLWSGI 274  
TcasGr27 -----QCEIVSDTLRNLDKIVTNGFRN-----VAESRKIFIEC 231  
TcasGr48 -----LDLVLPIYSQLVFMCKKINKLYGH--QLLLTILTYLIWTI 248  
AgamGr1 -----QLRSMIQLYRHILQIIIESFCVYGW--VLILIFFEHFLILT 262  
DmelGr10a -----LRPGMLLHHCCELSDRLEELRRRCREIHDLQRESFRMHQFQLIGLMLSTLINN 282  
DmelGr59e -----AFAVLVDAGGGSALMIEMRYTCNLIEQVHSQFLLRFGL--YLVNLLNLSLVSIC 264  
DmelGr10b -----YSDLMKQLRRRERLLRIGRRVHRMFALVIAIALIYLVFFNTAT 250  
DmelGr89a -----LLQKEYSWLRLIQRVVKLFQLG--IFLLVLSGFVNIM 238  
DmelGr57a -----QLHVQELRIRQVSMIQELHYLIQEINRVYALSLWAAMAHDAMSTSE 271  
DmelGr47b -----DSSEVHERIAYLFEMSKRCSFLLAELNGVFGFAAAGIFYDFTIMTCF 269  
DmelGr58a ---HEERNSLTLSENKANRSLGKLAKLFLKFAENQRLVREVFRTFDLPIALLLKMFTVN 266  
DmelGr58b -----KARKKWKALRSVAAMHLKTLRLARRIFDMFDIANATVFINMFTA 265  
DmelGr98a -----LQKLAKLQAIHNSLWQAIRCLECYFQLS--LITLLMKFFIDTS 252  
AaegGr93a -----AYKLTNSELKLSHDRLRIQYDKLYDVVVAIEIYSP--SILFLLVDFGQVT 276  
TcasGr19 -----AFIIFTIHLFLYCVLIILLCIYFYAFILFTVHLLLLVC 257  
DmelGr47a -----RLKMQHCLRLYSKLLLLCDQFNSQLGH--VAIWVLACKSWCQI 242  
DmelGr58c -----IPREMGLMQILAAWRKLWRRRCRLDALLKQFVDIFQWQVLFNLLTTYIFSIIV 276

TcasGr38 LALFRTAAELQASQIKWTRIAYMALASVPFIFDSIHLCDVCYSTIGTVS----- 327  
TcasGr46 LALFRTAAELQASQIKWTRIAYMALASVPFIFDSIHLCDVCYSTIGTVSKAGELIHQIQT 320  
TcasGr1 QVIFVICVLVQSEKIVWLHLVYISFLGIIICADVFIYICHVCYATIQEVR----- 305  
TcasGr123 ITIFFFTANVQAGELYFMSLLNPILSNVTFVIDVVYVCDVCYSTIEEAN----- 313  
TcasGr62 ITIFFFTANVQAGELYFMSLLNPILSNVTFVIDVVYVCDVCYSTIEEAN----- 588  
TcasGr25 INLFLSLQLAHQKLEFSACGFFLINGTLLHTIVGAVTVYLIMFIQFDIATTTKG----- 207  
TcasGr59 INLFLSLQLAHQKLEFSACGFFLINGTLLHTIVGAVTVYLIMFIQFDIATTTKG----- 382  
AgamGr2 AEFYFLYCSLTQQDVPIL--FRTAEVFLGLLAYIVYTALKCIVPFIVCWRTKT----- 336  
AaegGr66a AQFYFLYCALSKQEVPII--FRSATVLQISIIQIFYIAVKCVICIYVCWKTKT----- 398  
DmelGr66a AQLYFLYCATQYQSIPSL--FRSAKNPFITVIVLSYTSKGCVYLIYLSWKTSQ----- 412  
TcasGr11 FQAYYLYYVATGKAS----FVTVPIMVCPVWMLMDEVVEIYLLVYACASTCEQA----- 317  
TcasGr55 FQAYYLYYVATGKAS----FVTVPIMVCPVWMLMDEVVEIYLLVYACASTCEQA----- 317  
TcasGr21 TALFLVAINFNKSSSEENEKTTQLDYFFTFWAFSNACEVMAIVWITSETCEEI----- 352  
TcasGr56 TALFLVAINFNKSSSEENEKTTQLDYFFTFWAFSNACEVMAIVWITSETCEEV----- 352  
AaegGr FDSYYILETIF'TNDSTDPF'TKVQFVTF'FFCQGF IHVVGVLNIVYVNSLTIHEN----- 355



|            |                                                                    |     |
|------------|--------------------------------------------------------------------|-----|
| AaegGr28a  | FDWYIILETIFTDHTDSRFSRLQFVAFFLYQGLMHVIVVIKIVIFASLAVQE-----          | 250 |
| AgamGr33   | FNSYYVLDALLGSTSLDSPFSKQGFAMFFLCQAMVYGFVFNIVYSSSLVQEN-----          | 352 |
| DmelGr28bB | FDAYYVLETLGKSKRESKFKTVEFVTFVFFSCQMILYLIAIISIVEGNSRAIKKS-----       | 349 |
| DmelGr28bC | FDAYYVLETLGKSKRESKFKTVEFVTFVFFSCQMILYLIAIISIVEGNSRAIKKS-----       | 376 |
| DmelGr28bD | FDAYYVLETLGKSKRESKFKTVEFVTFVFFSCQMILYLIAIISIVEGNSRAIKKS-----       | 346 |
| DmelGr28bA | FDAYYVLETLGKSKRESKFKTVEFVTFVFFSCQMILYLIAIISIVEGNSRAIKKS-----       | 358 |
| DmelGr28bE | FDAYYVLETLGKSKRESKFKTVEFVTFVFFSCQMILYLIAIISIVEGNSRAIKKS-----       | 353 |
| AgamGr25   | ATSYFLMVELVGDKD-----AVFAWIQALWLFIHIFRFLLTIEPCHITNVES-----          | 377 |
| AaegGr43a  | ATSYFLMVELVGERD-----AVFSWIQALWLFIHIFRFLLTVEPCHITNVEV-----          | 317 |
| DmelGr43a  | ATAYFLFLELLSKRD-----NGYLWVQMLWICFHFLRLLMVVEPCHLAARES-----          | 355 |
| AgamGr37b  | NCSS----SSAVINEVQCCEGANMMLPVCNVPCAWIILIL-----YLSR-----             | 314 |
| AgamGr37d  | NCSS----SSAVINEVQCCEGANMMLPVCNVPCAWIILIL-----YLSR-----             | 310 |
| AgamGr37a  | NCSS----SSAVINEVQCCEGANMMLPVCNVPCAWIILIL-----YLSR-----             | 324 |
| AgamGr37c  | NCSS----SSAVINEVQCCEGANMMLPVCNVPCAWIILIL-----YLSR-----             | 318 |
| AgamGr37e  | NCSS----SSAVINEVQCCEGANMMLPVCNVPCAWIILIL-----YLSR-----             | 318 |
| AgamGr37f  | NCSS----SSAVINEVQCCEGANMMLPVCNVPCAWIILIL-----YLSR-----             | 345 |
| AaegGr28c  | VCSFGLFRAF IYRNELFYMGVLFNFVVMYLYFFVLFVFFIAVG---SKITREGKRI-----     | 490 |
| AaegGr28b  | FSVVFV--YRAMISQDYSQKLNAINVYLSMNWYVMLLILVMIGVFDGKQKGRKT-----        | 339 |
| AaegGr28e  | FSVVFV--YRAMISQDYSQKLNAINVYLSMNWYVMLLILVMIGVFDGKQKGRKT-----        | 339 |
| TcasGr14   | DTMYLFIHRSRQEDTDTLVVIYTFNLFYLCFCFYWLLVMVAMF SRTQQSANKT-----        | 304 |
| TcasGr49   | DTMYLFIHRSRQEDTDTLVVIYTFNLFYLCFCFYWLLVMVAMF SRTQQSANKT-----        | 348 |
| AmelGr4    | YIIFYFLAIFLKNINVDLILVIN--GILWILLCPFGLLTSKITKIVNEIEKT-----          | 333 |
| AmelGr5    | YNFYFLFLHFVNDK-LNFLITN--AIIWIMLPLSLLALLTSKVTNINEIEKT-----          | 332 |
| TcasGr16   | GDSYIVMYVFFHLSADVRYVMVYLLKNNVLYGLLELFI LAK-IVTDLQCEANST-----       | 320 |
| TcasGr22   | GDLHTSIYIIFDFMFIYQHHKIVLDMGKNCVTVYFDLFYLSK-RASDLCNEANKT-----       | 223 |
| TcasGr17   | GDAYAVLNSVLFQNVYKPLPVLVLSIVKNCLSYCFNLYHLAS-KSNQLSREAKVT-----       | 307 |
| TcasGr150  | GDAYAVLNSVLFQNVYKPLPVLVLSIVKNCLSYCFNLYHLAS-KSNQLSREAKVT-----       | 307 |
| TcasGr32   | VYLH-----LAVMLGFQDIYIMVYIIVVIFWYTVNASTNIFLCEICNEGQTIILG-----       | 291 |
| TcasGr54   | VYLH-----LAVMLGFQDIYIMVYIIVVIFWYTVNASTNIFLCEICNEGQTIILG-----       | 291 |
| TcasGr37   | VYLQ-----HIFVKSRPSPATIISNVTVISWQAVCTFYNNILLCDSVAHTAGELLG-----      | 265 |
| TcasGr53   | VYLQ-----HIFVKSRPSPATIISNVTVISWQAVCTFYNNILLCDSVAHTAGELLG-----      | 265 |
| TcasGr5    | IYIQ-----VIVIGTKNTIETVAYSVIFILWHIVGTFSGIFLCDLIRREIANVQV-----       | 278 |
| TcasGr12   | DYVS-----CVVA-----LIILILQCGRVRSEVVKILN-----                        | 248 |
| TcasGr13   | DYVS-----CVVA-----LIILILQCGRVRSEVVKILN-----                        | 322 |
| TcasGr104  | TCLNFITNNLKSENEEFKEKLLAANLCLVIYTLVSVSLVMVTCDACTIASKQTIIS-----      | 310 |
| TcasGr45   | TCLNFITNNLKSENEEFKEKLLAANLCLVIYTLVSVSLVMVTCDACTIASKQTIIS-----      | 310 |
| TcasGr98   | VALNFFTSTLEIDNLYLKHKLEISSLVQTAITLVAMCGLVLI CDSAKSESQTVF-----       | 307 |
| TcasGr52   | SSLGFLLYASK-KQFTFEETF AIIHLSVFFVYTLVSVILIMGCDVVASNSRKTAE-----      | 244 |
| TcasGr105  | SSL-----YTCIAGYEFNANFTISYILFALFNTFGTILLIMTCSGVHSESQKLVG-----       | 290 |
| TcasGr4    | STFFYFFTTGN-----IIATYDKQFYIHNALIVRALFLFFQLWATVYTSS-----            | 284 |
| TcasGr44   | STFFYFFTTGN-----IIATYDKQFYIHNALIVRALFLFFQLWATVYTSS-----            | 288 |
| AgamGr9a   | ICILDTRNHIINIDG-----IMSIVANILWPLSDLKLSAVFLLGEGVNRMVEETA-----       | 308 |
| AgamGr9c   | VCILDVNSYLARKNRP-----SMMVILANILWPLSDVKKLAAIFLLGEGVNGMVEETA-----    | 307 |
| AgamGr9b   | ICILDYDLLLLNNS-----SGLLYLVYI I WPLSDIKKVMILFMLSEQVNRLEVEETA-----   | 358 |
| AgamGr9d   | ICLLAIVNSMTNPMGQ-----SKFYIIVVVVWPLTDVKKLFAVILLSEKTKQVVEETA-----    | 314 |
| AgamGr9e   | LKLYHVYDVFIRGVNEIVW--T-EHMLNVI ECMWLCFVKKL FIVMYISGMLQKQVEETA----- | 310 |
| AgamGr9f   | LKLFHAYDVKRSTYRTVW--T-EQLLSASEWLWLSFVKKL FVVLYVSEVLKQKVEETA-----   | 307 |
| AgamGr9g   | VKMIDVGGALNDGTG-----DLTILILGCLWLLFDIKKLVLLLISERLQKQVEETA-----      | 310 |
| AgamGr9i   | ISLVDLGLLGDYDSDG-----DMSLIAVAGALWLLFDFKFFIVPLLLSECLKQKVEETA-----   | 311 |
| AgamGr9h   | SIWFSLSASSMQFQIVN--EESNLMLVSYLLWFLSDSKNVLVVAISSLLQKQVEETA-----     | 316 |
| AgamGr9j   | VAAYDVFNLRGES--KMILWDF--YRLLYRQVWEITYIVLMVLLAINCNATLSQVEETA-----   | 347 |
| AgamGr9l   | VAAYDVYDNYNLLD--VMSVWDK--FGLLFRQIQMIYPIIICMIGITGNLTSIQVEETA-----   | 337 |
| AgamGr9k   | YLVFECFYTYDAGS--PDSEMYNGFTDWAFSQFQSMYCHFLVLTVSSCERTRKMVEETA-----   | 329 |
| AgamGr9m   | YFMYEWFVRISTGQ--VVNGNYVSVQWITSQFQWLMYGNVLLLLVPSCEQASNEVEETA-----   | 332 |
| AgamGr9n   | YLAEHLYSTIETGT--MMPVADN--FFYSLFGQVWQTMYGALGYCISACGTASEEVEETA-----  | 299 |
| AgamGr10   | YLAEHLYSTIETGT--MMPVADN--FFYSLFGQVWQTMYGALGYCISACGTASEEVEETA-----  | 299 |
| AgamGr11   | YLVFDIYAVLALDRPVFMENLEIDYVQWALRQLWQTIYGA VVLLTVTGCRTCGELQOTA-----  | 304 |
| DmelGr23aA | TNAYWMIMGIYDG-GNVRS-----LIFNGATGIDFGTPIATLFWHGDSGAENGRQIGC-----    | 296 |
| DmelGr23aB | SNSYWLFDIRTRPWRIYA-----ILLNLGFI FNVALQMAAACWHCQSSYNLGRQIGC-----    | 300 |
| DmelGr39aA | L--IFYISNLGEGFHSSND-----LVLF--CWLAPMLFYLLPLVVNDIHNQANKTAK-----     | 299 |
| DmelGr39aB | G--VIYLTMTVIQTKKSIV-----LKLITNVVWLSPTFMTCAASFMSNRVTIQANKTAK-----   | 308 |
| DmelGr39aC | SGPFYLVSTIFEGFRQNWQFS---LMSFTAILWLSLPWIVLLV LAMGRNDVQKEANKTAK----- | 308 |
| DmelGr39aD | SGPFYLVSTIFEGFRQNWQFS---LMSFTAILWLSLPWIVLLV LAMGRNDVQKEANKTAK----- | 298 |
| DmelGr98c  | HVVNWAIIIRSIDPNDCCQLN-----RLGSTIFLSFNLLLT CFFSECCVKTYNSISYILH----- | 328 |
| DmelGr98d  | QIVN WALIKSVNPNECCQYR-----RVGTCLLLSINIFLSCLYSEFCIQTYNSISRVLH-----  | 326 |
| DmelGr98b  | HMVNWAYINKFLYDSCCQYE-----RFLVCSTLLVNL LLLPCLLSQRCINAYNCFPRILH----- | 326 |
| AgamGr51   | YSVR----PPASPVGNGM-ADDFKAYINPLIFFLYQCVQLYLLV LIPSVYTDHAKMMRL-----  | 340 |
| AgamGr52   | VSVYYMYTSTMVEVRRGFGVEDVTKYFNVSVTFFLYLAVQLY YMMSIPSQYTERSKMLSI----- | 337 |
| DmelGr94a  | SLICHLLGITVGFYSLYYAIADTLIMGKPYDGLGSLINLVFLSISLAEITLLTHLCNHL-----   | 325 |
| DmelGr97a  | SMLMNLGITMGCYNQYLAIADHYINEEPFDLFLAIVLVVFLAVPFL ELVMVARISNQT-----   | 346 |

DmelGr93b SLAQSLLAMSMVSY--HAILR-RQYS--FNLWG-LVIKLLIDVLLTMSVHSAVNGSRL 329  
DmelGr93c ILLGKIFATILSY---EVIIRPELYARKIGMWG-LVVKSFADVILLTLAVHEAVSSSRM 325  
DmelGr22d IVCFYIMIVYRISLSKMSFFVMLIMFPLAIANNFMDFWLS-----MKVCDLLQKTGRQTSM 319  
DmelGr22e LGIYFFIIYSISLNSKSLDFKLLVVFQALVIN-MLDFWLN-----VEICELAERTGRQTS 321  
DmelGr22a IVGHVLCWLNITRFSLLVIFLLFPQALI INFWDLWQG-----IAFCDLAESTGKKTSM 321  
DmelGr22b VVIYFLIVYGLSMR--TYSIFLVAFPNSLLINIWDFWLC-----IAACDLTEKAGDETAI 318  
DmelGr22c LAIYSWIVLDISMN--INFIYLLIFPLFLLVNVWNLWLS-----IAASDLAENAGKSTQT 315  
DmelGr22f VQIFFLIVLVGSMN--KRYIYLVASP-QLI INFWDFWLN-----IVVCDLAGKCGDQTSK 310  
DmelGr36a ATTYITYSLAINGI--EELHLSVRAAALVFSWFLFYYSAILNLFVMLKLFDDHKEMERI 323  
DmelGr36c GTCYLAYSILKHGY--ENLSMTLSTVILAYSWCFFYYLDGMLNLSVMLHVQDDYWEMLQI 323  
DmelGr36b GTSYMSYSIYKGP--HNLKLSAKTSIIIVCILITLFLYLDALVNCNNMLRVLDHKKDFLGL 323  
DmelGr59d GTSYLLFSISKYGN--FGNLLVIITLCGIVYFVYVVDWCWNAFNVFYLLDAHDKMVKL 322  
DmelGr59a INACIGTIYSTTDQ--EPSLEKIFGSLIYWVRSFDFFLN-----DYICDLVSEYQMQPKF 304  
DmelGr59b IQAYWGAFTFDLS--TPFFWVYVGSVQYHVRCLDYYLI-----DNMCDVAVEYHDSAKH 305  
AgamGr26 LQFFEIYRAT---TVRPWTVTDTYLLVYTVLWIVLHAAKVMILYPAHLVQREDRDTGPI 350  
AgamGr27 LELFNVIYKATGRGSKRVWSASEGFRLLVHTLLWIGLHGAKILLILYPGHRARVECERTGPT 333  
AgamGr29 TELLQLYQGVKAGAFDFVIGS-----KVLNSAQKILMLFLFAYPNRMIQTQNIIRGLKL 345  
AgamGr31 TELLQLYQGVKAGAFDFVIGS-----KLTNSALKFAMMVAYAIANRTIQTQNIIRGLKL 346  
AgamGr30 VILAELYFDNYD--LPLVFGI-----CLTHAAVYFMFFLI IAHANHAIIMENERTLLL 337  
AgamGr32a MLLLELYHNI SHPVMPEYCLWV-----LFLHAIHVHFTFFVVIATSNHAIQQENERTMLL 351  
TcasGr2 IQLFN-SLRMRN-DLERLYFYSFALLITRIVCLCLFGAKVHDES IKPLLTINSVPTEI 359  
TcasGr9 FQVFE-SFYLHKATLETVYFISLGLLILRLVSVCFYGSWINEESKLSLDDLSSVYPREV 360  
TcasGr7 IQLFN-SLRQMKN-NLERIYFYSFGLIVRTVCLCLFGGKVNDDESTQPMLVLNSVSADV 361  
TcasGr30 IQLFN-SLRQMKN-NLERIYFYSFGLI-----KLTNSAQKILMLFLFAYPNRMIQTQNIIRGLKL 331  
TcasGr29 IQLFN-SLRQMKN-NLERIYFYSFGLIVRTVCLCLFGGKVNDDESTQPMLVLNSVSADV 361  
AaegGr64f VQLYN--IFDPKQTTVTTFYFYSLLFLICRCFVMLYVTSSIYEASLKPLELLRDFATSS 318  
AaegGr64a3 VQLYN--IFE-----KLTNSAQKILMLFLFAYPNRMIQTQNIIRGLKL 268  
AgamGr14 VQLFN--SFDLKPTTVTTFYFYSLLFLIGRCFLMLFVSSISRASEKPLETLRRFPSTN 382  
AgamGr18 TQLFN--GFQRRRVIANYVYFYSLLLLMFRTIVMLYVSGVYAASTSPQLLRNVPSQH 354  
AaegGr64d TQLFN--GFQRRPAMTMYFYSLLLLFRITLCLMLYIGSGVHVASMSPLNLRNVPSKY 386  
AgamGr17 YQMYN--AFQFSASLISELYFKSFLAFLIFRTLVMMLLIASNIHVASLRPLDILRSVPMSC 343  
AaegGr64c YQLYM--SVQLDASSMTTFYRFSLLFLILRLTVMMLLTSSRVYVASRKPLEILRAVPMSS 368  
DmelGr64c VQIYH--SFQSKGNYADELYFWFCLSYVIRVNLMMFAASSIPQEAKEISYTLYEIPTEF 347  
DmelGr64d VQVYH--SFQVKGAFMDELYFWFCLLYVIRLNMMLLAASSIPQEKDISNTLYEVRSSP 356  
AgamGr20 LQTLN--ALEDKPYDINDWYFRYSFTFLILRITSVKLWFAADVENSVRTHKLVQKIRSEH 374  
AaegGr61a LQIMH--ATLEQPFILNRVYFYSFSLLLRTRFLMFWYSSQVDASHQPCRLLLRVPNHE 371  
AgamGr21 LQILH--VSKKLANTVEDAYYFYSLFLIGRTLVIRTVIVFLSAAHIHDCAKKPLDIIMKIPNVG 399  
AaegGr64a LQILN--VSQKLRYPMDVYFYSLLFLMGRATLFLCAAHIHAAKRPLDIVAKIPNNG 282  
DmelGr64a YQLLN--VFNKLRWPINYIYFYSLLYLIGRTAFVFLTAADINEESKRGLGVLRRVSSRS 393  
DmelGr61a NQALA--IFTKLRHPINYVYFYSLIFLLARTSLVFMTASKIHIDASLLPLRSYLVPSDG 376  
AgamGr15 VQILN--SMNSRPTLVHTVYFWFNLIILIGRTLAVAMFAAEVNDSEKRP I EVLRTIPREG 380  
AaegGr1 ASILN--SLNTHPTLVHTVYFWFGLAFLIGRTLAVSMCTAAVNDSEQRPFVLRRAIPRDG 384  
DmelGr5a LQLLK--SINTMPSSAHAVYFYSLLFLLSRSTAVLLFVSAINDQAREPLLRLLRVPLKG 380  
DmelGr64f VQLLR--SINTMPSSAHAVYFYSLLFLLSRSTAVLLFVSAINDQAREPLLRLLRVPLKG 380  
DmelGr64e GKILK--SMQAKPSIWHALYFWSFLVYLLGRTLILSLYSSSINDESKRPLVIFRLVPREY 399  
AmelGr1 IQLL--FSFNPMRGIIIEKIYFGFSFGFLARTTVVSLCAATIHDESLLPAPILYSVSSSS 328  
AmelGr2 LQLLNGLSISDKNSVLSEAYFFGSFAFLICRTCAVTLTLTARLHDQSKQALPYLYNCSTSS 418  
AgamGr16 VQLVN--NSS----FIVTSYFWSLFLHIGRIVAVSLYGSAIHDEYCRTRTLFYNLDPDEY 349  
AaegGr64e IQLIG--VLKPYPGIIVAIYVWYSLAHLMTMVMVAVYAAAIHDESRRILPTFRTLPTQY 371  
TcasGr6 SEIVDHGIRFSFKEIGLLVDSYCYLFLFVFCDCSHQASLNIARRVQVTLQVNLVQVDP 328  
TcasGr26 SEIVDHGIRFSFKEIGLLVDSYCYLFLFVFCDCSHQASLNIARRVQVTLQVNLVQVDP 328  
TcasGr33 SEIVDHGIRFSFKEIGLLVDSYCYLFLFVFCDCSHQASLNIARRVQVTLQVNLVQVDP 328  
AgamGr23 SEIIDHGFGFSFKEIGLIVDTVYCSTLLFIFCDCSHNATLQVAQGVQDTHLLSINLLKVDQ 412  
AaegGr21a SEVIDHGFGFSFKEIGLIVDTVYCSTLLFIFCDCSHNATLQVAQGVQDTHLLSINLLKVDH 404  
TcasGr10 TEIMDQGI--SFKEAGLFMIAFYCMTLLYIICNEGHATRKMGPEFRERLLNVNLSAVDQ 358  
TcasGr39 TEIMDQGI--SFKEAGLFMIAFYCMTLLYIICNEGHATRKMGPEFRERLLNVNLSAVDQ 358  
AgamGr22 SEIEHGA--TYKEVGLFVIVFYCMSLLFIICNEAHHASK-----RERLLNVNLTAVDK 377  
AaegGr21b SEIEHGA--TYKEVGLFVIVFYCMLLFIICNEAHASRRVGLNFQERLLNVNLTAVDK 383  
DmelGr21a SEIIDHGA--TYKEVGLFVIVFYCMLLYIICNEAHYASRKVGLDFQTKLLNINLTAVDA 384  
AgamGr24 SQISDGF---VKDIGLAVTAFCSVGLLFYICDEAHYASFNVRTNFQKLLMVELSWMNT 308  
AaegGr63a SQISEGFG---IKDIGLAVTAFCSVGLLFFIICDEAHYASFNVRTNFQKLLMVELSWMNS 373  
DmelGr63a SQLSEGFG---IKDIGLAVTAFCSVGLLFFIICDEAHYASFNVRTNFQKLLMVELSWMNS 402  
TcasGr3 QQLQAGFS---TKDIGLTINAGLAFILYFICDEAHYASNCLRVQFQKLLMVELSWMND 364  
DmelOr83b YQATKINGVNVYAFTVVG--YLYGALAQVVFHFCIFGNRLIEESSVMEAAYSCHWYDGSEE 437  
AgamOr7 YQATKIDGVNVYGLTVIG--YLYGALAQVVFHFCIFGNRLIEESSVMEAAYSCHWYDGSEE 429  
HvirOr2 YQATKINGINVYAFSTIG--YLSYTLGQVVFHFCIFGNRLIEESSVMEAAYSCHWYDGSEE 423  
TcasOr16 YQATKITGVDKYAATVLG--YLLFALAQVVFHFCIFGNRLIEESSVMEAAYSCHWYDGSEE 525  
TcasOr22 YQATKITGVDKYAATVLG--YLLFALAQVVFHFCIFGNRLIEESSVMEAAYSCHWYDGSEE 564  
AmelOr2 YQATKIHAVDTYAASVVG--YLLYSLGQVFMCLIFGNRLIEESSVMEAAYSCHWYDGSEE 429  
TcasGr31 IQLFG--SMKIVKGTLKTAYYLISFALLIMRLISVCLCGASVHSESS----- 223

TcasGr35 YKLEASFDLTYET----- 201  
DmelGr59c GSIYFSVCSILYSSTGFGSTYWGLLLIVLSTASFYMDNWLSVNI GFHIRDQDELFRVLA 329  
DmelGr92a ALIYKVLIALIGFNVAVEFYLNSEFIWILLGKHVLDLFLVTVSVEGAVNQFLNIGMCFG 323  
DmelGr28a FDDFYILEALINPKRLDVEFADEFFAFFLMLQLIWYIVIVLVEGSSRTILHSSYTAIV 366  
DmelGr64b FQLFN-SFKNIGVDFLVMLAFWYSLGFVAVRLLTIFVASSINDYERKIVTALRDVPSR- 340  
TcasGr71 NYIDEVFNNGFYDKKQYIGVVANVGVAFMINVGTVTLLILSCDAVLEEVTLLLLAYKI 288  
AgamGr19 YQLFH-LVDRDFFIIVTVFTYFSLFFIILRTFLTMHYCSAVHEVARKPLKLFRRVPTS 336  
AaegGr64b YLLLH--SLKPHAYAISFVYFWYTLFCFLIGRTLTLWMAAELNREKRSALRVVQRISSDG 284  
DmelGr93d VVWYKMIIDLGFSDFRISWFSLNKLIQTLLPVLAIQEAANQFKQTRERALDIFLVGKSK- 321  
TcasGr34 NYIDDLFFFRFEKSKFEPFLISNISLVSLIFLNFCTLIIMCDCVRSEASKVVKN----- 270  
TcasGr43 DNVDTIMYEKTNVTFVHLAVLNILRVGKNFVCLLSLIIILCDVVKQAQKSLVLTVEMRWY 294  
TcasGr47 QDLSDFIYKYDQAQLVSLALLMQLTQLVPALFVIYLCGRVMEEQNKIRLITFEMNKSFER 270  
AmelGr3 ITPYFLILQAGERHEWIFLIVQGGWICIFHITRMLIIVQPSYSAIAEAKKTAVLVSQLLSC 385  
AgamGr32b IELLEFYQS I KLGTLTPTTIFMKFLYAASKFSFYILIAYPNRLIQENQKALFMYRIKR 356  
AgamGr50 FSVSRWRVRCALYGILTTVLYRSVQIFITYTSLVQDLEAGSTNALRNIINPLAFFISEV 316  
TcasGr20 VTPYYLLIEVCNAGYLPFILLQVAVIVLHLIRLMYQVTTNLVLLKLLTSPLLP----- 335  
TcasGr79 GKQYNIASSKTLKLSINIISLVQLWIFQLYLLILCDQILREFDQIVVILSKVKSILN--- 295  
TcasGr15 YRMETNVVFNRSRKNLDVMKSFVNFRLPSFTAARFIEDRINAESRKPRIILFVDSSEIY 326  
TcasGr60 GDLYVTLYIILTNNQAKYCTTLIGLIKNCVIVIFELYLHVQCNVSTEVIGNILRLMHR 289  
AgamGr38 FYTFAFTLIRSVPALAEIVFNAGPIISYSMFAYNVFIVAFYGNALKQQKIGTQLDKAI 335  
TcasGr51 SCINFPLGLDRGNFDIEIALCNGIFLLLTGLSLLQMVISMDSTVEEAKTFVDRCYKMQE 709  
DmelGr39b VNIYWTQQVLVEVYKYLYATFSVFPVSPFNILVFCRCGEFCQRQSVLIGSYLRNLSCH 309  
AgamGr28 LLLLEIYQYLQANELQANSIIVSNVMWLALYICLLLMVLYPCDMIKREQMRFGTILFEL 316  
TcasGr61 FAFICYYSISIRPISTLGIWFFWVSLRLRIYELARKAAFAHLNSNEARATLNWVSKLIIRSN 610  
TcasGr50 TQFYCYDSDGNSDNLTDVYFTLQWAFQLQILEILALAYLCKDKVQLKIGEIKYS----- 301  
AgamGr12 CQYFILFCSTVDGLVP IVTGLTVLHTQLWESLFLMLLVGYACDSCHNQIQDVNVAVRN 311  
AgamGr36 FVIYATSFSYVGRSRETRTLILLTACVVYIIMIGLIFFTGVVENTSNDIVGLLHEAI 334  
AgamGr48 SRIYFVYILSAQVKHRSYMSYHRFFNSILYICFEAVQCFLALGSSVIAQEARRPGTTM 336  
AgamGr49a TILRTHSALTCKIQNIVEFYNTPLALIMLYQFLIIESEAEKTGVLLNEFLPTDNP--- 346  
AgamGr49b FYAYTSIVQDIKNDVDVPLGYTMSILFAVFEAVQFYIIVSASEITEEVKRHAEKTVL 339  
DmelGr2a SNCYWMFLNFRQSAASPFDLQIVASGVWSAPHLGNVVLVLSLLCDRTAQCASRALCLHQ 342  
DmelGr32a TNCYNLFVQITGKGMVSPNLIQWCFAWLCLHVSLALLSRSCGLTTTEANATSQILARVY 391  
DmelGr68a NQSYLAFATLTAGLSKTEVADTIGLSCIWVLAETITMIVICSACDGLASEVNGTAQIL 317  
AmelGr7 NLLHLLYRVWLNFTLPELLQELISVIFWILLIYGSQILYVNHVCASTNSEAVNIGNIICE 340  
AmelGr8 FNLYIYLILYNTEVGKITKINSTLGFIFVYIVVISISMIEIRVQMKKIGSNIHKILV 335  
AmelGr9 FNLYFFLLKMYSPKTENIKWFIPNLAPALFFFIFKAMI IWICESTTNEAKKIKWTLYDA 327  
TcasGr57 NLTDLFLVYGMKSRNIEGVSFGTNLVILCALWITLTLFTLLAYGCAGATSEAEKIAK 316  
TcasGr41 YTIFFLLIFGSGSATPENNVSVVYVLLIYILESLLYMVTKLVVVTFKFKIKKIQIFGIMI 306  
AgamGr34 IQLYYSYTYLWFTGENGFITWSLMVCLNTISINLGVLLTIVLLCEKISNKTKHANDLLA 349  
AgamGr35 IQSYCYLHLTAKGDRGLS IETLVLSGGIILYNVIAIVALPYICEQVESESKLLMSYLSK 372  
AgamGr39 VSCFTTIHVVYLAASSYSIVDPIIMSQFLSFFILIMQVMFAGNLLHKKAKQTAILLHK 354  
AgamGr40 FSIFGLIHAFSQVEEDES HQVSMNMMVYGCYLSFIIQVVVAGSLVTKCKRVTIVFHKA 327  
AaegGr28d FSIFSVIHSNAGQTDDEVTRVTVWNAVMDGFFVYVYTLQLIVAASIVNETCKRSSVMIIKA 333  
AgamGr42 FSILTIHMLTNSAPIVLAALALISALTIYTLFLVVLVVKLGSGLKREGKQTAIVHKA 355  
AgamGr41 STLFQVFITMIHVLISQLITTFAFIRVMFYHYNETELNDSIYTIGTTSYCCLPITITWI 359  
AgamGr43 FGFFIVTKLLFWNYQMLDLILRACRYAFECIPACLLVYYMLIVCASTHSELFKSASLLHK 350  
DmelGr33a FGIFFLETKVNFIVGGKSRLLDYMTYLYVWISFTTMMVAYIVLRLCCNANNHKSQSAMIVH 396  
AgamGr44 VTQLLYLHYRTRSELSFAALGHETFTCLLCYFEVYCIAEACELVREQSLKTQKLLRLNL 336  
AgamGr13 YQFTHFYTSLGNPSPHILEAMGTMMILVYGMYTAQLIAECYAISEKSKQIKSTVHRLSL 338  
AgamGr45 GYNTCMMSVRYAEAKVQGDSTEDFLETVYVWVWFVEIFVLVYFSDHTEVEARRTVHLL 368  
AgamGr46 RILRICNVCSAKNEVIEEKHSTHKGSLVRCWCDVSYCFQFLHTCMCVCLLSLFC DTP 366  
Dmelr93a LMLYQYILHFLNDDEVVVFSIVMAFVKLANLVLLMMCADYTVRQSEVPKPLDIVCSDM 350  
AmelGr6 SNLYFIIDWVILTPWTNIAWPLIINMWCWLIGFITQLLALHIACDYTINEIFNRKIPNSR 367  
AmelGr10 IYSLKVFKLSDYGKIRESMVLTDCAWNLVLTITVCHMTAHQVDLSLNQTEISPSRRTYG 310  
TcasGr28 ANAFITSQSCENATLYSGDEMYFRVAFPSVFTLIDYSLWKACFVEVRR----- 248  
TcasGr40 FGSFIFNANSAIEGIIFFNLAKSWPQLIEKWSRVEMALDNWKNKSLKRKFYLTICTIMS 321  
AgamGr3 FDLYWVYAMWQKQQRGVELQIFCFVPTPVIIGFLMHAAKKHQLEMDAVQGTVLDMNF-- 319  
AgamGr4 CDLYWLYMSMKWFEATEYKVVIVITLLPSTSIIVLLLSAESCGLGVAASLQSALLDIPMG 357  
AgamGr6 IDGYWMYASLHYDGNLYKVESFLCGISPVLMMFVLFNTCQKCVDEGEITFYVLSVLRV 351  
AgamGr7 CDLYSLYALYLNQLDDIFAYILSIVATFTALGVVLAACENCKNQVGMGQLLYKRLHG- 359  
AgamGr47 FGLFTIYNFNSGTWAFRIMAIANGAWIAFYLAAILSVITATTAQTSGRMTGDIVHQII 337  
DmelGr8a VDCYFMYYSIYNNVINNDYLLIVPALLEIPAFIYASQSCMVVPRIAHQHLNIVTDSGCC 323  
AgamGr5 SNSYVVFWLLNNQRHHAAGIISRLICRIILLGATFYINSCAMKSAQNRHLRHLTMDLGI 369  
AgamGr8 TDTYWIHVHGMMSGKVFSDVLECECLSSKFCILMINLHSNERILSEFHRTRVLLHCHILRW 309  
DmelGr9a CNVYFMVAYLQVLPATLFLFGQVMFVVCPTLIKIWSICAASHRCVSKSKHLQQQLKDLPG 282  
DmelGr59f LVLFLVYQGIENPSMADFTKWCMLLWLAMHVGVKCSILHFNQSIQNEHSTCLTLLSRVS 333  
DmelGr77a FMKYSKFI LRKYGRSFP LNYPFAIAFLVGLFTNLLLVLPTYYSERRFNCTREIKGGGLA 383  
DmelGr85a VAGYLLVRFVIGNGLQDVELVYLVFSFITCIQPLMLSLLVNSMTSTTGLSLEVTRDILKI 334  
TcasGr27 IEQYNVILRYTKIVSDTYQGIILVVQFFCSLVALCLTMYKLSLTEDLYFAIYEMHWYDAS- 290  
TcasGr48 YEMYHLAILWSCTSTNCPFLIMLALS YTVIQEVMFLFTILWNCQNTRVASEDFKAIWYSI 308

|           |                                                                  |     |
|-----------|------------------------------------------------------------------|-----|
| AgamGr1   | DRSFFAIRMYRMPMGFSIQQVLSMMMTWVFLALNDMLLVGACTATEKALQQFEQQQLCEV     | 322 |
| DmelGr10a | LTNFYTLFHM LAKQSLEEVSYV VVGSVYATGFYIDTYIVALINEHIKLELEAVALTMR     | 342 |
| DmelGr59e | VELYLIFNFFETPLWEESVLLVYRLLW LAMHGGRIWFILSVNEQILEQKCNLCQLLNE      | 324 |
| DmelGr10b | IYLYGTFMIQKHDALGLRGRGLKMLLT VVSFLVILWDVVLLQVIC EKLLAEENKICDCPE   | 310 |
| DmelGr89a | VNIYAFMSYVSLHGVPLTISNNCLVLAI QLYAVILAAHLQVRS AKLRKKCLQLEYVPE     | 298 |
| DmelGr57a | LYILFGQSVGIGQQNEEENGSCYRMLG YLALVMIPPLYKLLIAPFYCDRTIYEARRCLRL    | 331 |
| DmelGr47b | VYVICQKLLEREPWDPEYVYMLLHVAI HTYKVVITSTYGYLLLR EKRNCMHLLSQYSRYF   | 329 |
| DmelGr58a | VNLVYHGVQFGNDTIETSSYTRIVGQW VVISHYWSAVLLMNVVDDVTRRSDLKMGDLLRE    | 326 |
| DmelGr58b | INILYHAVQYSNSSI KSNGWGILFGNGLI VFNFWGTMALMEMLDSVVTSCNNTGQQLRQL   | 325 |
| DmelGr98a | ALPYWLYLSRVEHTRVAVQHYVATVEC IKLEIVVPCYLCTRC DAMQRKFLSMFYTVTDD    | 312 |
| AaegGr93a | FELYMFYCDLSHASLDDDDLHMI AF SFSVAIFS FTEILFI INGTSKFSDKLMQALEQLQR | 336 |
| TcasGr19  | IYYFYMHLLFCFAFIIFTMHL LFLLCIYYFYCALIILLCIYYFCRAFIIFP-----        | 309 |
| DmelGr47a | TFGYEIFQMVAAPKSIDL TMSMRV FVIFTYIFDAMNLF LGTDISEL FSTFRADSQRILRE | 302 |
| DmelGr58c | LFRLWIYLEFDFKNFHLWKGIYAIIFL THHVEIVMQFSIFEINRCKWLG LLEDVGNLWDI   | 336 |

|            |                                                               |     |
|------------|---------------------------------------------------------------|-----|
| TcasGr38   | -----                                                         |     |
| TcasGr46   | EDHDIIDEIEMFSLQIANEQVEFNAAGFFP INYTLVFSVLKQYVMQQQVKNFRHSVRSVF | 380 |
| TcasGr1    | -----                                                         |     |
| TcasGr123  | -----                                                         |     |
| TcasGr62   | -----                                                         |     |
| TcasGr25   | -----                                                         |     |
| TcasGr59   | -----                                                         |     |
| AgamGr2    | -----                                                         |     |
| AaegGr66a  | -----                                                         |     |
| DmelGr66a  | -----                                                         |     |
| TcasGr11   | -----                                                         |     |
| TcasGr55   | -----                                                         |     |
| TcasGr21   | -----                                                         |     |
| TcasGr56   | -----                                                         |     |
| AaegGr     | -----                                                         |     |
| AaegGr28a  | -----                                                         |     |
| AgamGr33   | -----                                                         |     |
| DmelGr28bB | -----                                                         |     |
| DmelGr28bC | -----                                                         |     |
| DmelGr28bD | -----                                                         |     |
| DmelGr28bA | -----                                                         |     |
| DmelGr28bE | -----                                                         |     |
| AgamGr25   | -----                                                         |     |
| AaegGr43a  | -----                                                         |     |
| DmelGr43a  | -----                                                         |     |
| AgamGr37b  | -----                                                         |     |
| AgamGr37d  | -----                                                         |     |
| AgamGr37a  | -----                                                         |     |
| AgamGr37c  | -----                                                         |     |
| AgamGr37e  | -----                                                         |     |
| AgamGr37f  | -----                                                         |     |
| AaegGr28c  | -----                                                         |     |
| AaegGr28b  | -----                                                         |     |
| AaegGr28e  | -----                                                         |     |
| TcasGr14   | -----                                                         |     |
| TcasGr49   | -----                                                         |     |
| AmelGr4    | -----                                                         |     |
| AmelGr5    | -----                                                         |     |
| TcasGr16   | -----                                                         |     |
| TcasGr22   | -----                                                         |     |
| TcasGr17   | -----                                                         |     |
| TcasGr150  | -----                                                         |     |
| TcasGr32   | -----                                                         |     |
| TcasGr54   | -----                                                         |     |
| TcasGr37   | -----                                                         |     |
| TcasGr53   | -----                                                         |     |
| TcasGr5    | -----                                                         |     |
| TcasGr12   | -----                                                         |     |
| TcasGr13   | -----                                                         |     |
| TcasGr104  | -----                                                         |     |
| TcasGr45   | -----                                                         |     |
| TcasGr98   | -----                                                         |     |
| TcasGr52   | -----                                                         |     |
| TcasGr105  | -----                                                         |     |

|            |                 |     |
|------------|-----------------|-----|
| TcasGr4    | QVTR-----       | 288 |
| TcasGr44   | QVTR-----       | 292 |
| AgamGr9a   | LCTR-----       | 312 |
| AgamGr9c   | LCTR-----       | 311 |
| AgamGr9b   | LCTR-----       | 362 |
| AgamGr9d   | LCTR-----       | 318 |
| AgamGr9e   | LCTR-----       | 314 |
| AgamGr9f   | LCTR-----       | 311 |
| AgamGr9g   | LCTR-----       | 314 |
| AgamGr9i   | LCTR-----       | 315 |
| AgamGr9h   | LCTR-----       | 320 |
| AgamGr9j   | LCTR-----       | 351 |
| AgamGr9l   | LCTR-----       | 341 |
| AgamGr9k   | LCTR-----       | 333 |
| AgamGr9m   | LCTR-----       | 336 |
| AgamGr9n   | LCTR-----       | 303 |
| AgamGr10   | LCTR-----       | 303 |
| AgamGr11   | QLVR-----       | 308 |
| DmelGr23aA | LISK-----       | 300 |
| DmelGr23aB | LISK-----       | 304 |
| DmelGr39aA | MLTK-----       | 303 |
| DmelGr39aB | MLTK-----       | 312 |
| DmelGr39aC | MLTK-----       | 312 |
| DmelGr39aD | MLTK-----       | 302 |
| DmelGr98c  | QIGC-----       | 332 |
| DmelGr98d  | QMYC-----       | 330 |
| DmelGr98b  | KIRC-----       | 330 |
| AgamGr51   | LNYS-----       | 343 |
| AgamGr52   | LG-----         | 339 |
| DmelGr94a  | VATRRSAVIL----- | 335 |
| DmelGr97a  | VETRRTGELL----- | 356 |
| DmelGr93b  | IRR---LSF-----  | 335 |
| DmelGr93c  | MRR---LSL-----  | 331 |
| DmelGr22d  | ILKL-----       | 323 |
| DmelGr22e  | ILKL-----       | 325 |
| DmelGr22a  | ILKL-----       | 325 |
| DmelGr22b  | ILKI-----       | 322 |
| DmelGr22c  | VLKL-----       | 319 |
| DmelGr22f  | VLKL-----       | 314 |
| DmelGr36a  | LEER-----       | 327 |
| DmelGr36c  | LGKR-----       | 327 |
| DmelGr36b  | LEER-----       | 327 |
| DmelGr59d  | LNKR-----       | 326 |
| DmelGr59a  | FAP-----        | 307 |
| DmelGr59b  | SWS-----        | 308 |
| AgamGr26   | LCHFNP-----     | 356 |
| AgamGr27   | LYEIASR-----    | 340 |
| AgamGr29   | LYQLNQP-----    | 352 |
| AgamGr31   | LFQLHSS-----    | 353 |
| AgamGr30   | LLDINCI-----    | 344 |
| AgamGr32a  | LHEFKCS-----    | 358 |
| TcasGr2    | -----           |     |
| TcasGr9    | -----           |     |
| TcasGr7    | -----           |     |
| TcasGr30   | -----           |     |
| TcasGr29   | -----           |     |
| AaegGr64f  | -----           |     |
| AaegGr64a3 | -----           |     |
| AgamGr14   | -----           |     |
| AgamGr18   | -----           |     |
| AaegGr64d  | -----           |     |
| AgamGr17   | -----           |     |
| AaegGr64c  | -----           |     |
| DmelGr64c  | -----           |     |
| DmelGr64d  | -----           |     |
| AgamGr20   | -----           |     |
| AaegGr61a  | -----           |     |
| AgamGr21   | -----           |     |
| AaegGr64a  | -----           |     |
| DmelGr64a  | -----           |     |

|           |                      |     |
|-----------|----------------------|-----|
| DmelGr61a | -----                |     |
| AgamGr15  | -----                |     |
| AaegGr1   | -----                |     |
| DmelGr5a  | -----                |     |
| DmelGr64f | -----                |     |
| DmelGr64e | -----                |     |
| AmelGr1   | -----                |     |
| AmelGr2   | -----                |     |
| AgamGr16  | G-----               | 350 |
| AaegGr64e | -----                |     |
| TCasGr6   | A-----               | 329 |
| TcasGr26  | A-----               | 329 |
| TcasGr33  | A-----               | 329 |
| AgamGr23  | P-----               | 413 |
| AaegGr21a | P-----               | 405 |
| TcasGr10  | K-----               | 359 |
| TcasGr39  | K-----               | 359 |
| AgamGr22  | A-----               | 378 |
| AaegGr21b | A-----               | 384 |
| DmelGr21a | A-----               | 385 |
| AgamGr24  | D-----               | 309 |
| AaegGr63a | D-----               | 374 |
| DmelGr63a | D-----               | 403 |
| TcasGr3   | E-----               | 365 |
| DmelOr83b | -----                |     |
| AgamOr7   | -----                |     |
| HvirOr2   | -----                |     |
| TcasOr16  | -----                |     |
| TcasOr22  | -----                |     |
| AmelOr2   | -----                |     |
| TcasGr31  | -----                |     |
| TcasGr35  | -----                |     |
| DmelGr59c | DR-----              | 331 |
| DmelGr92a | N-----               | 324 |
| DmelGr28a | HKILN-----           | 371 |
| DmelGr64b | -----                |     |
| TcasGr71  | RQVFP-----           | 293 |
| AgamGr19  | -----                |     |
| AaegGr64b | -----                |     |
| DmelGr93d | -----                |     |
| TcasGr34  | -----                |     |
| TcasGr43  | CQTAT-----           | 299 |
| TcasGr47  | -----                |     |
| AmelGr3   | TFEAN-----           | 390 |
| AgamGr32b | ISCS-----            | 360 |
| AgamGr50  | GQVYFMVSSATFSR-----  | 331 |
| TcasGr20  | -----                |     |
| TcasGr79  | -----                |     |
| TcasGr15  | N-----               | 327 |
| TcasGr60  | -----                |     |
| AgamGr38  | NSTNN-----           | 340 |
| TcasGr51  | QFTLN-----           | 714 |
| DmelGr39b | PSIG-----            | 313 |
| AgamGr28  | SHSG-----            | 320 |
| TcasGr61  | P-----               | 611 |
| TcasGr50  | -----                |     |
| AgamGr12  | NVGS-----            | 315 |
| AgamGr36  | QR-----              | 336 |
| AgamGr48  | NVFPVN-----          | 341 |
| AgamGr49a | -----                |     |
| AgamGr49b | LN-----              | 341 |
| DmelGr2a  | VSVDLR-----          | 348 |
| DmelGr32a | AKSK-----            | 395 |
| DmelGr68a | ARIYG-----           | 322 |
| AmelGr7   | FYEP-----            | 344 |
| AmelGr8   | HTFD-----            | 339 |
| AmelGr9   | FSDS-----            | 331 |
| TcasGr57  | ICFYWLN-----         | 323 |
| TcasGr41  | TKACMSASNLIQTPN----- | 322 |
| AgamGr34  | DLQLR-----           | 354 |

|            |                                                                 |     |
|------------|-----------------------------------------------------------------|-----|
| AgamGr35   | LS-----                                                         | 374 |
| AgamGr39   | -----                                                           |     |
| AgamGr40   | VCYG-----                                                       | 331 |
| AaegGr28d  | AAYG-----                                                       | 337 |
| AgamGr42   | NQSS-----                                                       | 359 |
| AgamGr41   | AGHIKKR-----                                                    | 366 |
| AgamGr43   | LLQYKSN-----                                                    | 357 |
| DmelGr33a  | EIMQ-----                                                       | 400 |
| AgamGr44   | SP-----                                                         | 338 |
| AgamGr13   | IPGQ-----                                                       | 342 |
| AgamGr45   | RMPN-----                                                       | 372 |
| AgamGr46   | -----                                                           |     |
| Dmelr93a   | DER-----                                                        | 353 |
| AmelGr6    | LILWAP-----                                                     | 373 |
| AmelGr10   | DIT-----                                                        | 313 |
| TcasGr28   | -----                                                           |     |
| TcasGr40   | -----                                                           |     |
| AgamGr3    | -----                                                           |     |
| AgamGr4    | N-----                                                          | 358 |
| AgamGr6    | LP-----                                                         | 353 |
| AgamGr7    | -----                                                           |     |
| AgamGr47   | RKHQN-----                                                      | 342 |
| DmelGr8a   | SCP-----                                                        | 326 |
| AgamGr5    | QIKC-----                                                       | 373 |
| AgamGr8    | QLR-----                                                        | 312 |
| DmelGr9a   | -----                                                           |     |
| DmelGr59f  | YAR-----                                                        | 336 |
| DmelGr77a  | FPSR-----                                                       | 387 |
| DmelGr85a  | SHKKS-----                                                      | 339 |
| TcasGr27   | -----                                                           |     |
| TcasGr48   | LIKK-----                                                       | 312 |
| AgamGr1    | GKMAN-----                                                      | 327 |
| DmelGr10a  | FAEP-----                                                       | 346 |
| DmelGr59e  | VCSS-----                                                       | 328 |
| DmelGr10b  | DVAS-----                                                       | 314 |
| DmelGr89a  | G-----                                                          | 299 |
| DmelGr57a  | VEKLD-----                                                      | 336 |
| DmelGr47b  | SGQD-----                                                       | 333 |
| DmelGr58a  | FS-----                                                         | 328 |
| DmelGr58b  | SDLP-----                                                       | 329 |
| DmelGr98a  | RRSS-----                                                       | 316 |
| AaegGr93a  | IG-----                                                         | 338 |
| TcasGr19   | -----                                                           |     |
| DmelGr47a  | TS-----                                                         | 304 |
| DmelGr58c  | NYSGRQ-----                                                     | 342 |
| TcasGr38   | -----WCELNFDWSS-----                                            | 337 |
| TcasGr46   | FLSEIFGLVNLKYRETYFRLSKTKTFCTLVLTALVYCSLAI FVLCELLIEGTT SILINVPS | 440 |
| TcasGr1    | -----AKIYFFYLVK-----                                            | 315 |
| TcasGr123  | -----                                                           |     |
| TcasGr62   | -----                                                           |     |
| TcasGr25   | -----                                                           |     |
| TcasGr59   | -----                                                           |     |
| AgamGr2    | -----                                                           |     |
| AaegGr66a  | -----                                                           |     |
| DmelGr66a  | -----                                                           |     |
| TcasGr11   | -----                                                           |     |
| TcasGr55   | -----                                                           |     |
| TcasGr21   | -----                                                           |     |
| TcasGr56   | -----                                                           |     |
| AaegGr     | -----                                                           |     |
| AaegGr28a  | -----                                                           |     |
| AgamGr33   | -----                                                           |     |
| DmelGr28bB | -----                                                           |     |
| DmelGr28bC | -----                                                           |     |
| DmelGr28bD | -----                                                           |     |
| DmelGr28bA | -----                                                           |     |
| DmelGr28bE | -----                                                           |     |
| AgamGr25   | -----                                                           |     |

AaegGr43a -----  
DmelGr43a -----  
AgamGr37b -----  
AgamGr37d -----  
AgamGr37a -----  
AgamGr37c -----  
AgamGr37e -----  
AgamGr37f -----  
AaegGr28c -----  
AaegGr28b -----  
AaegGr28e -----  
TcasGr14 -----  
TcasGr49 -----  
AmelGr4 -----  
AmelGr5 -----  
TcasGr16 -----  
TcasGr22 -----  
TcasGr17 -----  
TcasGr150 -----  
TcasGr32 -----  
TcasGr54 -----  
TcasGr37 -----  
TcasGr53 -----  
TcasGr5 -----  
TcasGr12 -----  
TcasGr13 -----  
TcasGr104 -----  
TcasGr45 -----  
TcasGr98 -----  
TcasGr52 -----  
TcasGr105 -----  
TcasGr4 -----  
TcasGr44 -----  
AgamGr9a -----  
AgamGr9c -----  
AgamGr9b -----  
AgamGr9d -----  
AgamGr9e -----  
AgamGr9f -----  
AgamGr9g -----  
AgamGr9i -----  
AgamGr9h -----  
AgamGr9j -----  
AgamGr9l -----  
AgamGr9k -----  
AgamGr9m -----  
AgamGr9n -----  
AgamGr10 -----  
AgamGr11 -----  
DmelGr23aA -----  
DmelGr23aB -----  
DmelGr39aA -----  
DmelGr39aB -----  
DmelGr39aC -----  
DmelGr39aD -----  
DmelGr98c -----  
DmelGr98d -----  
DmelGr98b -----  
AgamGr51 -----  
AgamGr52 -----  
DmelGr94a -----  
DmelGr97a -----  
DmelGr93b -----  
DmelGr93c -----  
DmelGr22d -----  
DmelGr22e -----  
DmelGr22a -----  
DmelGr22b -----  
DmelGr22c -----  
DmelGr22f -----



DmelGr36a -----  
DmelGr36c -----  
DmelGr36b -----  
DmelGr59d -----  
DmelGr59a -----  
DmelGr59b -----  
AgamGr26 -----  
AgamGr27 -----  
AgamGr29 -----  
AgamGr31 -----  
AgamGr30 -----  
AgamGr32a -----  
TcasGr2 -----  
TcasGr9 -----  
TcasGr7 -----  
TcasGr30 -----  
TcasGr29 -----  
AaegGr64f -----  
AaegGr64a3 -----  
AgamGr14 -----  
AgamGr18 -----  
AaegGr64d -----  
AgamGr17 -----  
AaegGr64c -----  
DmelGr64c -----  
DmelGr64d -----  
AgamGr20 -----  
AaegGr61a -----  
AgamGr21 -----  
AaegGr64a -----  
DmelGr64a -----  
DmelGr61a -----  
AgamGr15 -----  
AaegGr1 -----  
DmelGr5a -----  
DmelGr64f -----  
DmelGr64e -----  
AmelGr1 -----  
AmelGr2 -----  
AgamGr16 -----  
AaegGr64e -----  
TCasGr6 -----  
TcasGr26 -----  
TcasGr33 -----  
AgamGr23 -----  
AaegGr21a -----  
TcasGr10 -----  
TcasGr39 -----  
AgamGr22 -----  
AaegGr21b -----  
DmelGr21a -----  
AgamGr24 -----  
AaegGr63a -----  
DmelGr63a -----  
TcasGr3 -----  
DmelOr83b -----  
AgamOr7 -----  
HvirOr2 -----  
TcasOr16 -----  
TcasOr22 -----  
AmelOr2 -----  
TcasGr31 -----  
TcasGr35 -----  
DmelGr59c -----  
DmelGr92a -----  
DmelGr28a -----  
DmelGr64b -----  
TcasGr71 -----  
AgamGr19 -----  
AaegGr64b -----

DmelGr93d -----  
TcasGr34 -----  
TcasGr43 -----  
TcasGr47 -----  
AmelGr3 -----  
AgamGr32b -----  
AgamGr50 -----  
TcasGr20 -----  
TcasGr79 -----  
TcasGr15 -----  
TcasGr60 -----  
AgamGr38 -----  
TcasGr51 -----  
DmelGr39b -----  
AgamGr28 -----  
TcasGr61 -----  
TcasGr50 -----  
AgamGr12 -----  
AgamGr36 -----  
AgamGr48 -----  
AgamGr49a -----  
AgamGr49b -----  
DmelGr2a -----  
DmelGr32a -----  
DmelGr68a -----  
AmelGr7 -----  
AmelGr8 -----  
AmelGr9 -----  
TcasGr57 -----  
TcasGr41 -----  
AgamGr34 -----  
AgamGr35 -----  
AgamGr39 -----  
AgamGr40 -----  
AaegGr28d -----  
AgamGr42 -----  
AgamGr41 -----  
AgamGr43 -----  
DmelGr33a -----  
AgamGr44 -----  
AgamGr13 -----  
AgamGr45 -----  
AgamGr46 -----  
Dmelr93a -----  
AmelGr6 -----  
AmelGr10 -----  
TcasGr28 -----  
TcasGr40 -----  
AgamGr3 -----  
AgamGr4 -----  
AgamGr6 -----  
AgamGr7 -----  
AgamGr47 -----  
DmelGr8a -----  
AgamGr5 -----  
AgamGr8 -----  
DmelGr9a -----  
DmelGr59f -----  
DmelGr77a -----  
DmelGr85a -----  
TcasGr27 -----  
TcasGr48 -----  
AgamGr1 -----  
DmelGr10a -----  
DmelGr59e -----  
DmelGr10b -----  
DmelGr89a -----  
DmelGr57a -----  
DmelGr47b -----  
DmelGr58a -----

|            |                                                                 |     |
|------------|-----------------------------------------------------------------|-----|
| DmelGr58b  | -----                                                           |     |
| DmelGr98a  | -----                                                           |     |
| AaegGr93a  | -----                                                           |     |
| TcasGr19   | -----                                                           |     |
| DmelGr47a  | -----                                                           |     |
| DmelGr58c  | -----                                                           |     |
|            |                                                                 |     |
| TcasGr38   | -----                                                           |     |
| TcasGr46   | LI IHVST SAYVATVWINSVINRWKFIEFIRKVL EFDVKCVSNYTKQQSKIHLIVRSVFVT | 500 |
| TcasGr1    | -----                                                           |     |
| TcasGr123  | -----                                                           |     |
| TcasGr62   | -----                                                           |     |
| TcasGr25   | -----                                                           |     |
| TcasGr59   | -----                                                           |     |
| AgamGr2    | -----                                                           |     |
| AaegGr66a  | -----                                                           |     |
| DmelGr66a  | -----                                                           |     |
| TcasGr11   | -----                                                           |     |
| TcasGr55   | -----                                                           |     |
| TcasGr21   | -----                                                           |     |
| TcasGr56   | -----                                                           |     |
| AaegGr     | -----                                                           |     |
| AaegGr28a  | -----                                                           |     |
| AgamGr33   | -----                                                           |     |
| DmelGr28bB | -----                                                           |     |
| DmelGr28bC | -----                                                           |     |
| DmelGr28bD | -----                                                           |     |
| DmelGr28bA | -----                                                           |     |
| DmelGr28bE | -----                                                           |     |
| AgamGr25   | -----                                                           |     |
| AaegGr43a  | -----                                                           |     |
| DmelGr43a  | -----                                                           |     |
| AgamGr37b  | -----                                                           |     |
| AgamGr37d  | -----                                                           |     |
| AgamGr37a  | -----                                                           |     |
| AgamGr37c  | -----                                                           |     |
| AgamGr37e  | -----                                                           |     |
| AgamGr37f  | -----                                                           |     |
| AaegGr28c  | -----                                                           |     |
| AaegGr28b  | -----                                                           |     |
| AaegGr28e  | -----                                                           |     |
| TcasGr14   | -----                                                           |     |
| TcasGr49   | -----                                                           |     |
| AmelGr4    | -----                                                           |     |
| AmelGr5    | -----                                                           |     |
| TcasGr16   | -----                                                           |     |
| TcasGr22   | -----                                                           |     |
| TcasGr17   | -----                                                           |     |
| TcasGr150  | -----                                                           |     |
| TcasGr32   | -----                                                           |     |
| TcasGr54   | -----                                                           |     |
| TcasGr37   | -----                                                           |     |
| TcasGr53   | -----                                                           |     |
| TcasGr5    | -----                                                           |     |
| TcasGr12   | -----                                                           |     |
| TcasGr13   | -----                                                           |     |
| TcasGr104  | -----                                                           |     |
| TcasGr45   | -----                                                           |     |
| TcasGr98   | -----                                                           |     |
| TcasGr52   | -----                                                           |     |
| TcasGr105  | -----                                                           |     |
| TcasGr4    | -----                                                           |     |
| TcasGr44   | -----                                                           |     |
| AgamGr9a   | -----                                                           |     |
| AgamGr9c   | -----                                                           |     |
| AgamGr9b   | -----                                                           |     |
| AgamGr9d   | -----                                                           |     |
| AgamGr9e   | -----                                                           |     |
| AgamGr9f   | -----                                                           |     |

AgamGr9g -----  
AgamGr9i -----  
AgamGr9h -----  
AgamGr9j -----  
AgamGr9l -----  
AgamGr9k -----  
AgamGr9m -----  
AgamGr9n -----  
AgamGr10 -----  
AgamGr11 -----  
DmelGr23aA -----  
DmelGr23aB -----  
DmelGr39aA -----  
DmelGr39aB -----  
DmelGr39aC -----  
DmelGr39aD -----  
DmelGr98c -----  
DmelGr98d -----  
DmelGr98b -----  
AgamGr51 -----  
AgamGr52 -----  
DmelGr94a -----  
DmelGr97a -----  
DmelGr93b -----  
DmelGr93c -----  
DmelGr22d -----  
DmelGr22e -----  
DmelGr22a -----  
DmelGr22b -----  
DmelGr22c -----  
DmelGr22f -----  
DmelGr36a -----  
DmelGr36c -----  
DmelGr36b -----  
DmelGr59d -----  
DmelGr59a -----  
DmelGr59b -----  
AgamGr26 -----  
AgamGr27 -----  
AgamGr29 -----  
AgamGr31 -----  
AgamGr30 -----  
AgamGr32a -----  
TcasGr2 -----  
TcasGr9 -----  
TcasGr7 -----  
TcasGr30 -----  
TcasGr29 -----  
AaegGr64f -----  
AaegGr64a3 -----  
AgamGr14 -----  
AgamGr18 -----  
AaegGr64d -----  
AgamGr17 -----  
AaegGr64c -----  
DmelGr64c -----  
DmelGr64d -----  
AgamGr20 -----  
AaegGr61a -----  
AgamGr21 -----  
AaegGr64a -----  
DmelGr64a -----  
DmelGr61a -----  
AgamGr15 -----  
AaegGr1 -----  
DmelGr5a -----  
DmelGr64f -----  
DmelGr64e -----  
AmelGr1 -----  
AmelGr2 -----

AgamGr16 -----  
AaegGr64e -----  
TCasGr6 -----  
TcasGr26 -----  
TcasGr33 -----  
AgamGr23 -----  
AaegGr21a -----  
TcasGr10 -----  
TcasGr39 -----  
AgamGr22 -----  
AaegGr21b -----  
DmelGr21a -----  
AgamGr24 -----  
AaegGr63a -----  
DmelGr63a -----  
TcasGr3 -----  
DmelOr83b -----  
AgamOr7 -----  
HvirOr2 -----  
TcasOr16 -----  
TcasOr22 -----  
AmelOr2 -----  
TcasGr31 -----  
TcasGr35 -----  
DmelGr59c -----  
DmelGr92a -----  
DmelGr28a -----  
DmelGr64b -----  
TcasGr71 -----  
AgamGr19 -----  
AaegGr64b -----  
DmelGr93d -----  
TcasGr34 -----  
TcasGr43 -----  
TcasGr47 -----  
AmelGr3 -----  
AgamGr32b -----  
AgamGr50 -----  
TcasGr20 -----  
TcasGr79 -----  
TcasGr15 -----  
TcasGr60 -----  
AgamGr38 -----  
TcasGr51 -----  
DmelGr39b -----  
AgamGr28 -----  
TcasGr61 -----  
TcasGr50 -----  
AgamGr12 -----  
AgamGr36 -----  
AgamGr48 -----  
AgamGr49a -----  
AgamGr49b -----  
DmelGr2a -----  
DmelGr32a -----  
DmelGr68a -----  
AmelGr7 -----  
AmelGr8 -----  
AmelGr9 -----  
TcasGr57 -----  
TcasGr41 -----  
AgamGr34 -----  
AgamGr35 -----  
AgamGr39 -----  
AgamGr40 -----  
AaegGr28d -----  
AgamGr42 -----  
AgamGr41 -----  
AgamGr43 -----  
DmelGr33a -----

AgamGr44 -----  
 AgamGr13 -----  
 AgamGr45 -----  
 AgamGr46 -----  
 Dmelr93a -----  
 AmelGr6 -----  
 AmelGr10 -----  
 TcasGr28 -----  
 TcasGr40 -----  
 AgamGr3 -----  
 AgamGr4 -----  
 AgamGr6 -----  
 AgamGr7 -----  
 AgamGr47 -----  
 DmelGr8a -----  
 AgamGr5 -----  
 AgamGr8 -----  
 DmelGr9a -----  
 DmelGr59f -----  
 DmelGr77a -----  
 DmelGr85a -----  
 TcasGr27 -----  
 TcasGr48 -----  
 AgamGr1 -----  
 DmelGr10a -----  
 DmelGr59e -----  
 DmelGr10b -----  
 DmelGr89a -----  
 DmelGr57a -----  
 DmelGr47b -----  
 DmelGr58a -----  
 DmelGr58b -----  
 DmelGr98a -----  
 AaegGr93a -----  
 TcasGr19 -----  
 DmelGr47a -----  
 DmelGr58c -----

TcasGr38 -----  
 TcasGr46 TYLMFDYCTVLRVQRFNNYQSLAHYLRVFFTFVFNVVHCYLASELVLMMLKNRFVTLNVQLT 560  
 TcasGr1 -----  
 TcasGr123 -----  
 TcasGr62 -----  
 TcasGr25 -----  
 TcasGr59 -----  
 AgamGr2 -----  
 AaegGr66a -----  
 DmelGr66a -----  
 TcasGr11 -----  
 TcasGr55 -----  
 TcasGr21 -----  
 TcasGr56 -----  
 AaegGr -----  
 AaegGr28a -----  
 AgamGr33 -----  
 DmelGr28bB -----  
 DmelGr28bC -----  
 DmelGr28bD -----  
 DmelGr28bA -----  
 DmelGr28bE -----  
 AgamGr25 -----  
 AaegGr43a -----  
 DmelGr43a -----  
 AgamGr37b -----  
 AgamGr37d -----  
 AgamGr37a -----  
 AgamGr37c -----  
 AgamGr37e -----  
 AgamGr37f -----

AaegGr28c -----  
AaegGr28b -----  
AaegGr28e -----  
TcasGr14 -----  
TcasGr49 -----  
AmelGr4 -----  
AmelGr5 -----  
TcasGr16 -----  
TcasGr22 -----  
TcasGr17 -----  
TcasGr150 -----  
TcasGr32 -----  
TcasGr54 -----  
TcasGr37 -----  
TcasGr53 -----  
TcasGr5 -----  
TcasGr12 -----  
TcasGr13 -----  
TcasGr104 -----  
TcasGr45 -----  
TcasGr98 -----  
TcasGr52 -----  
TcasGr105 -----  
TcasGr4 -----  
TcasGr44 -----  
AgamGr9a -----  
AgamGr9c -----  
AgamGr9b -----  
AgamGr9d -----  
AgamGr9e -----  
AgamGr9f -----  
AgamGr9g -----  
AgamGr9i -----  
AgamGr9h -----  
AgamGr9j -----  
AgamGr9l -----  
AgamGr9k -----  
AgamGr9m -----  
AgamGr9n -----  
AgamGr10 -----  
AgamGr11 -----  
DmelGr23aA -----  
DmelGr23aB -----  
DmelGr39aA -----  
DmelGr39aB -----  
DmelGr39aC -----  
DmelGr39aD -----  
DmelGr98c -----  
DmelGr98d -----  
DmelGr98b -----  
AgamGr51 -----  
AgamGr52 -----  
DmelGr94a -----  
DmelGr97a -----  
DmelGr93b -----  
DmelGr93c -----  
DmelGr22d -----  
DmelGr22e -----  
DmelGr22a -----  
DmelGr22b -----  
DmelGr22c -----  
DmelGr22f -----  
DmelGr36a -----  
DmelGr36c -----  
DmelGr36b -----  
DmelGr59d -----  
DmelGr59a -----  
DmelGr59b -----  
AgamGr26 -----  
AgamGr27 -----

AgamGr29 -----  
 AgamGr31 -----  
 AgamGr30 -----  
 AgamGr32a -----  
 TcasGr2 -----  
 TcasGr9 -----  
 TcasGr7 -----  
 TcasGr30 -----  
 TcasGr29 -----  
 AaegGr64f -----  
 AaegGr64a3 -----  
 AgamGr14 -----  
 AgamGr18 -----  
 AaegGr64d -----  
 AgamGr17 -----  
 AaegGr64c -----  
 DmelGr64c -----  
 DmelGr64d -----  
 AgamGr20 -----  
 AaegGr61a -----  
 AgamGr21 -----  
 AaegGr64a -----  
 DmelGr64a -----  
 DmelGr61a -----  
 AgamGr15 -----  
 AaegGr1 -----  
 DmelGr5a -----  
 DmelGr64f -----  
 DmelGr64e -----  
 AmelGr1 -----  
 AmelGr2 -----  
 AgamGr16 -----  
 AaegGr64e -----  
 TCasGr6 -----  
 TcasGr26 -----  
 TcasGr33 -----  
 AgamGr23 -----  
 AaegGr21a -----  
 TcasGr10 -----  
 TcasGr39 -----  
 AgamGr22 -----  
 AaegGr21b -----  
 DmelGr21a -----  
 AgamGr24 -----  
 AaegGr63a -----  
 DmelGr63a -----  
 TcasGr3 -----  
 DmelOr83b -----  
 AgamOr7 -----  
 HvirOr2 -----  
 TcasOr16 -----  
 TcasOr22 -----  
 AmelOr2 -----  
 TcasGr31 -----  
 TcasGr35 -----  
 DmelGr59c -----  
 DmelGr92a -----  
 DmelGr28a -----  
 DmelGr64b -----  
 TcasGr71 -----  
 AgamGr19 -----  
 AaegGr64b -----  
 DmelGr93d -----  
 TcasGr34 -----  
 TcasGr43 -----  
 TcasGr47 -----  
 AmelGr3 -----  
 AgamGr32b -----  
 AgamGr50 -----  
 TcasGr20 -----



TcasGr79 -----  
TcasGr15 -----  
TcasGr60 -----  
AgamGr38 -----  
TcasGr51 -----  
DmelGr39b -----  
AgamGr28 -----  
TcasGr61 -----  
TcasGr50 -----  
AgamGr12 -----  
AgamGr36 -----  
AgamGr48 -----  
AgamGr49a -----  
AgamGr49b -----  
DmelGr2a -----  
DmelGr32a -----  
DmelGr68a -----  
AmelGr7 -----  
AmelGr8 -----  
AmelGr9 -----  
TcasGr57 -----  
TcasGr41 -----  
AgamGr34 -----  
AgamGr35 -----  
AgamGr39 -----  
AgamGr40 -----  
AaegGr28d -----  
AgamGr42 -----  
AgamGr41 -----  
AgamGr43 -----  
DmelGr33a -----  
AgamGr44 -----  
AgamGr13 -----  
AgamGr45 -----  
AgamGr46 -----  
Dmelr93a -----  
AmelGr6 -----  
AmelGr10 -----  
TcasGr28 -----  
TcasGr40 -----  
AgamGr3 -----  
AgamGr4 -----  
AgamGr6 -----  
AgamGr7 -----  
AgamGr47 -----  
DmelGr8a -----  
AgamGr5 -----  
AgamGr8 -----  
DmelGr9a -----  
DmelGr59f -----  
DmelGr77a -----  
DmelGr85a -----  
TcasGr27 -----  
TcasGr48 -----  
AgamGr1 -----  
DmelGr10a -----  
DmelGr59e -----  
DmelGr10b -----  
DmelGr89a -----  
DmelGr57a -----  
DmelGr47b -----  
DmelGr58a -----  
DmelGr58b -----  
DmelGr98a -----  
AaegGr93a -----  
TcasGr19 -----  
DmelGr47a -----  
DmelGr58c -----

|            |                                                              |     |
|------------|--------------------------------------------------------------|-----|
| TcasGr38   | -----                                                        |     |
| TcasGr46   | KLTKNCATKAQSVVLGRICTLHHHLSKLVTRFNEIFGLGLLLMFGVSFLLITQTIFIICV | 620 |
| TcasGr1    | -----                                                        |     |
| TcasGr123  | -----                                                        |     |
| TcasGr62   | -----                                                        |     |
| TcasGr25   | -----                                                        |     |
| TcasGr59   | -----                                                        |     |
| AgamGr2    | -----                                                        |     |
| AaegGr66a  | -----                                                        |     |
| DmelGr66a  | -----                                                        |     |
| TcasGr11   | -----                                                        |     |
| TcasGr55   | -----                                                        |     |
| TcasGr21   | -----                                                        |     |
| TcasGr56   | -----                                                        |     |
| AaegGr     | -----                                                        |     |
| AaegGr28a  | -----                                                        |     |
| AgamGr33   | -----                                                        |     |
| DmelGr28bB | -----                                                        |     |
| DmelGr28bC | -----                                                        |     |
| DmelGr28bD | -----                                                        |     |
| DmelGr28bA | -----                                                        |     |
| DmelGr28bE | -----                                                        |     |
| AgamGr25   | -----                                                        |     |
| AaegGr43a  | -----                                                        |     |
| DmelGr43a  | -----                                                        |     |
| AgamGr37b  | -----                                                        |     |
| AgamGr37d  | -----                                                        |     |
| AgamGr37a  | -----                                                        |     |
| AgamGr37c  | -----                                                        |     |
| AgamGr37e  | -----                                                        |     |
| AgamGr37f  | -----                                                        |     |
| AaegGr28c  | -----                                                        |     |
| AaegGr28b  | -----                                                        |     |
| AaegGr28e  | -----                                                        |     |
| TcasGr14   | -----                                                        |     |
| TcasGr49   | -----                                                        |     |
| AmelGr4    | -----                                                        |     |
| AmelGr5    | -----                                                        |     |
| TcasGr16   | -----                                                        |     |
| TcasGr22   | -----                                                        |     |
| TcasGr17   | -----                                                        |     |
| TcasGr150  | -----                                                        |     |
| TcasGr32   | -----                                                        |     |
| TcasGr54   | -----                                                        |     |
| TcasGr37   | -----                                                        |     |
| TcasGr53   | -----                                                        |     |
| TcasGr5    | -----                                                        |     |
| TcasGr12   | -----                                                        |     |
| TcasGr13   | -----                                                        |     |
| TcasGr104  | -----                                                        |     |
| TcasGr45   | -----                                                        |     |
| TcasGr98   | -----                                                        |     |
| TcasGr52   | -----                                                        |     |
| TcasGr105  | -----                                                        |     |
| TcasGr4    | -----                                                        |     |
| TcasGr44   | -----                                                        |     |
| AgamGr9a   | -----                                                        |     |
| AgamGr9c   | -----                                                        |     |
| AgamGr9b   | -----                                                        |     |
| AgamGr9d   | -----                                                        |     |
| AgamGr9e   | -----                                                        |     |
| AgamGr9f   | -----                                                        |     |
| AgamGr9g   | -----                                                        |     |
| AgamGr9i   | -----                                                        |     |
| AgamGr9h   | -----                                                        |     |
| AgamGr9j   | -----                                                        |     |
| AgamGr9l   | -----                                                        |     |
| AgamGr9k   | -----                                                        |     |
| AgamGr9m   | -----                                                        |     |
| AgamGr9n   | -----                                                        |     |

AgamGr10 -----  
AgamGr11 -----  
DmelGr23aA -----  
DmelGr23aB -----  
DmelGr39aA -----  
DmelGr39aB -----  
DmelGr39aC -----  
DmelGr39aD -----  
DmelGr98c -----  
DmelGr98d -----  
DmelGr98b -----  
AgamGr51 -----  
AgamGr52 -----  
DmelGr94a -----  
DmelGr97a -----  
DmelGr93b -----  
DmelGr93c -----  
DmelGr22d -----  
DmelGr22e -----  
DmelGr22a -----  
DmelGr22b -----  
DmelGr22c -----  
DmelGr22f -----  
DmelGr36a -----  
DmelGr36c -----  
DmelGr36b -----  
DmelGr59d -----  
DmelGr59a -----  
DmelGr59b -----  
AgamGr26 -----  
AgamGr27 -----  
AgamGr29 -----  
AgamGr31 -----  
AgamGr30 -----  
AgamGr32a -----  
TcasGr2 -----  
TcasGr9 -----  
TcasGr7 -----  
TcasGr30 -----  
TcasGr29 -----  
AaegGr64f -----  
AaegGr64a3 -----  
AgamGr14 -----  
AgamGr18 -----  
AaegGr64d -----  
AgamGr17 -----  
AaegGr64c -----  
DmelGr64c -----  
DmelGr64d -----  
AgamGr20 -----  
AaegGr61a -----  
AgamGr21 -----  
AaegGr64a -----  
DmelGr64a -----  
DmelGr61a -----  
AgamGr15 -----  
AaegGr1 -----  
DmelGr5a -----  
DmelGr64f -----  
DmelGr64e -----  
AmelGr1 -----  
AmelGr2 -----  
AgamGr16 -----  
AaegGr64e -----  
TCasGr6 -----  
TcasGr26 -----  
TcasGr33 -----  
AgamGr23 -----  
AaegGr21a -----  
TcasGr10 -----

TcasGr39 -----  
AgamGr22 -----  
AaegGr21b -----  
DmelGr21a -----  
AgamGr24 -----  
AaegGr63a -----  
DmelGr63a -----  
TcasGr3 -----  
DmelOr83b -----  
AgamOr7 -----  
HvirOr2 -----  
TcasOr16 -----  
TcasOr22 -----  
AmelOr2 -----  
TcasGr31 -----  
TcasGr35 -----  
DmelGr59c -----  
DmelGr92a -----  
DmelGr28a -----  
DmelGr64b -----  
TcasGr71 -----  
AgamGr19 -----  
AaegGr64b -----  
DmelGr93d -----  
TcasGr34 -----  
TcasGr43 -----  
TcasGr47 -----  
AmelGr3 -----  
AgamGr32b -----  
AgamGr50 -----  
TcasGr20 -----  
TcasGr79 -----  
TcasGr15 -----  
TcasGr60 -----  
AgamGr38 -----  
TcasGr51 -----  
DmelGr39b -----  
AgamGr28 -----  
TcasGr61 -----  
TcasGr50 -----  
AgamGr12 -----  
AgamGr36 -----  
AgamGr48 -----  
AgamGr49a -----  
AgamGr49b -----  
DmelGr2a -----  
DmelGr32a -----  
DmelGr68a -----  
AmelGr7 -----  
AmelGr8 -----  
AmelGr9 -----  
TcasGr57 -----  
TcasGr41 -----  
AgamGr34 -----  
AgamGr35 -----  
AgamGr39 -----  
AgamGr40 -----  
AaegGr28d -----  
AgamGr42 -----  
AgamGr41 -----  
AgamGr43 -----  
DmelGr33a -----  
AgamGr44 -----  
AgamGr13 -----  
AgamGr45 -----  
AgamGr46 -----  
Dmelr93a -----  
AmelGr6 -----  
AmelGr10 -----  
TcasGr28 -----

|            |                                                               |     |
|------------|---------------------------------------------------------------|-----|
| TcasGr40   | -----                                                         |     |
| AgamGr3    | -----                                                         |     |
| AgamGr4    | -----                                                         |     |
| AgamGr6    | -----                                                         |     |
| AgamGr7    | -----                                                         |     |
| AgamGr47   | -----                                                         |     |
| DmelGr8a   | -----                                                         |     |
| AgamGr5    | -----                                                         |     |
| AgamGr8    | -----                                                         |     |
| DmelGr9a   | -----                                                         |     |
| DmelGr59f  | -----                                                         |     |
| DmelGr77a  | -----                                                         |     |
| DmelGr85a  | -----                                                         |     |
| TcasGr27   | -----                                                         |     |
| TcasGr48   | -----                                                         |     |
| AgamGr1    | -----                                                         |     |
| DmelGr10a  | -----                                                         |     |
| DmelGr59e  | -----                                                         |     |
| DmelGr10b  | -----                                                         |     |
| DmelGr89a  | -----                                                         |     |
| DmelGr57a  | -----                                                         |     |
| DmelGr47b  | -----                                                         |     |
| DmelGr58a  | -----                                                         |     |
| DmelGr58b  | -----                                                         |     |
| DmelGr98a  | -----                                                         |     |
| AaegGr93a  | -----                                                         |     |
| TcasGr19   | -----                                                         |     |
| DmelGr47a  | -----                                                         |     |
| DmelGr58c  | -----                                                         |     |
|            |                                                               |     |
| TcasGr38   | -----QVSKAGELIHQIQ--TEDHDII                                   | 357 |
| TcasGr46   | IVQSEQIAWLHLLYIFLVGIMYAADVIFYICHVCCSTIHEVSKAGELIHKIE--TNDHEII | 678 |
| TcasGr1    | -----FYKVKSGELIHKIE--TNEHEII                                  | 337 |
| TcasGr123  | -----KAGELIHKID--TEDHDIR                                      | 330 |
| TcasGr62   | -----KAGELIHKID--TEDHDIR                                      | 605 |
| TcasGr25   | -----AAPAVSKARQFLPALPGYVPVY                                   | 229 |
| TcasGr59   | -----AAPAVSKARQFLPALPGYVPVY                                   | 404 |
| AgamGr2    | -----DSQRTGIELHYLANAVDEVHVCY                                  | 358 |
| AaegGr66a  | -----ESQRTGVFMHHLANMVDETHFY                                   | 420 |
| DmelGr66a  | -----ASKRTGISLHKCGVVADDNLLY                                   | 434 |
| TcasGr11   | -----NDTPSILHELNRNNYF--HMDLE                                  | 337 |
| TcasGr55   | -----NDTPSILHELNRNNYF--HMDLE                                  | 337 |
| TcasGr21   | -----VAGVTYLVILIQFNNSDFVQR                                    | 374 |
| TcasGr56   | -----SKKCYK-----                                              | 358 |
| AaegGr     | -----KQIAVNVHKLINVNN-YDELTA                                   | 376 |
| AaegGr28a  | -----VMLRI-----                                               | 255 |
| AgamGr33   | -----DNIGSNVHKLNLNAAAGADSELA                                  | 374 |
| DmelGr28bB | -----EKTGGIVHSLLNKTK--SAEVK                                   | 369 |
| DmelGr28bC | -----EKTGGIVHSLLNKTK--SAEVK                                   | 396 |
| DmelGr28bD | -----EKTGGIVHSLLNKTK--SAEVK                                   | 366 |
| DmelGr28bA | -----EKTGGIVHSLLNKTK--SAEVK                                   | 378 |
| DmelGr28bE | -----EKTGGIVHSLLNKTK--SAEVK                                   | 373 |
| AgamGr25   | -----NRTITIINSLRRTCK--DVEMI                                   | 397 |
| AaegGr43a  | -----RLISLL-----                                              | 323 |
| DmelGr43a  | -----RKTIQIVCEIERKVH--EPILA                                   | 375 |
| AgamGr37b  | -----                                                         |     |
| AgamGr37d  | -----                                                         |     |
| AgamGr37a  | -----                                                         |     |
| AgamGr37c  | -----                                                         |     |
| AgamGr37e  | -----                                                         |     |
| AgamGr37f  | -----                                                         |     |
| AaegGr28c  | -----GVLVHKAINCASSA-----VI                                    | 507 |
| AaegGr28b  | -----AALVHKALRETSNDR-----IR                                   | 356 |
| AaegGr28e  | -----AALVHKALRETSNDR-----IR                                   | 356 |
| TcasGr14   | -----ATFVHEIWNKYALKNEVDKRV                                    | 325 |
| TcasGr49   | -----ATFVHEIWNKYALKNEVDKRV                                    | 369 |
| AmelGr4    | -----GCIHVHILLNCVIDQ---KVK                                    | 350 |
| AmelGr5    | -----GCIHVHLLNCTIDR---ETK                                     | 349 |
| TcasGr16   | -----KKLIVKIKIDIDKE---DER                                     | 337 |

|            |                         |       |     |
|------------|-------------------------|-------|-----|
| TcasGr22   | -----KILLVGLKIDIDQE---- | EER   | 240 |
| TcasGr17   | -----KTVLLGVKIDICNE---- | EER   | 324 |
| TcasGr150  | -----KTVLLGVKIDICNE---- | EER   | 324 |
| TcasGr32   | -----ISYSLE-KLKTG-DEI   |       | 305 |
| TcasGr54   | -----ISYSLE-KLKTG-DEI   |       | 305 |
| TcasGr37   | -----AVYSLDLELKHI-ENF   |       | 280 |
| TcasGr53   | -----AVYSLDLELKHI-ENF   |       | 280 |
| TcasGr5    | -----LAYKIEAKRRD--NEI   |       | 292 |
| TcasGr12   | -----VLKKIALRRQTNGDL    |       | 264 |
| TcasGr13   | -----VLKKIALRRQTNGDL    |       | 338 |
| TcasGr104  | -----WCYKLQEQFVTNSEVR   |       | 326 |
| TcasGr45   | -----WCYKLQEQFVTNSEVR   |       | 326 |
| TcasGr98   | -----LCYKLMKFPERSHEQ    |       | 323 |
| TcasGr52   | -----MCYKLQGFYPPEAPQR   |       | 260 |
| TcasGr105  | -----VCYEQDRFSDESKKR    |       | 306 |
| TcasGr4    | -----                   |       |     |
| TcasGr44   | -----                   |       |     |
| AgamGr9a   | -----HFDDYRLQNTRAA      |       | 325 |
| AgamGr9c   | -----HFDDYRLQNTRAA      |       | 324 |
| AgamGr9b   | -----HFDDYRLQNTRAA      |       | 375 |
| AgamGr9d   | -----HFDDYRLQNTRAA      |       | 331 |
| AgamGr9e   | -----HFDDYRLQNTRAA      |       | 327 |
| AgamGr9f   | -----HFDDYRLQNTRAA      |       | 324 |
| AgamGr9g   | -----HFDDYRLQNTRAA      |       | 327 |
| AgamGr9i   | -----HFDDYRLQNTRAA      |       | 328 |
| AgamGr9h   | -----HFDDYRLQNTRAA      |       | 333 |
| AgamGr9j   | -----HFDDYRLQNTRAA      |       | 364 |
| AgamGr9l   | -----HFDDYRLQNTRAA      |       | 354 |
| AgamGr9k   | -----HFDDYRLQNTRAA      |       | 346 |
| AgamGr9m   | -----HFDDYRLQNTRAA      |       | 349 |
| AgamGr9n   | -----HFDDYRLQNTRAA      |       | 316 |
| AgamGr10   | -----HFDDYRLQNTRAA      |       | 316 |
| AgamGr11   | -----RLDDDRNRNSRVA      |       | 321 |
| DmelGr23aA | -----LVKP--QGSKLYN      |       | 311 |
| DmelGr23aB | -----LVKP--QGSKLYN      |       | 315 |
| DmelGr39aA | -----VPRT--GTG--LD      |       | 312 |
| DmelGr39aB | -----VPRT--GTG--LD      |       | 321 |
| DmelGr39aC | -----VPRT--GTG--LD      |       | 321 |
| DmelGr39aD | -----VPRT--GTG--LD      |       | 311 |
| DmelGr98c  | -----LPTA--EEFQMLK      |       | 343 |
| DmelGr98d  | -----LSAA--EDYLILK      |       | 341 |
| DmelGr98b  | -----TSAD--PNFAMLT      |       | 341 |
| AgamGr51   | -----VSVNQHHHRPGQE      |       | 356 |
| AgamGr52   | -----AINHRSRGRRME       |       | 351 |
| DmelGr94a  | -----QEMNLQHADSRYR      |       | 348 |
| DmelGr97a  | -----QRFDLQHADARFK      |       | 369 |
| DmelGr93b  | -----ENFYVTDSSQS-YH     |       | 347 |
| DmelGr93c  | -----ENFPITDHKA-WH      |       | 343 |
| DmelGr22d  | -----FNDIENMDKDL        |       | 335 |
| DmelGr22e  | -----FNDIENIDEKLE       |       | 337 |
| DmelGr22a  | -----FNDMENMDQETE       |       | 337 |
| DmelGr22b  | -----FSDLEHRDDKLE       |       | 334 |
| DmelGr22c  | -----FADLEVKDIELE       |       | 331 |
| DmelGr22f  | -----FTDLEHDDEELE       |       | 326 |
| DmelGr36a  | -----TLFTSALDVRLE       |       | 339 |
| DmelGr36c  | -----TIFVG-LDVRLE       |       | 338 |
| DmelGr36b  | -----TVFASSLDIRLE       |       | 339 |
| DmelGr59d  | -----TLFQPGLDHRLE       |       | 338 |
| DmelGr59a  | -----                   | ESSMS | 312 |
| DmelGr59b  | -----                   | EVRWT | 313 |
| AgamGr26   | -----AALDSALNSAL        |       | 367 |
| AgamGr27   | -----YEAAGRSNSAL        |       | 351 |
| AgamGr29   | -----GNDSRSNEITN        |       | 363 |
| AgamGr31   | -----SSSSRCHEITN        |       | 364 |
| AgamGr30   | -----WNSELNGMVDY        |       | 355 |
| AgamGr32a  | -----WSSEQN-MT--        |       | 366 |
| TcasGr2    | -----                   | YN    | 361 |
| TcasGr9    | -----                   | YN    | 362 |
| TcasGr7    | -----                   | YN    | 363 |
| TcasGr30   | -----                   |       |     |

|            |       |                                  |     |
|------------|-------|----------------------------------|-----|
| TcasGr29   | ----- | YN                               | 363 |
| AaegGr64f  | ----- | WN                               | 320 |
| AaegGr64a3 | ----- |                                  |     |
| AgamGr14   | ----- | WN                               | 384 |
| AgamGr18   | ----- | WG                               | 356 |
| AaegGr64d  | ----- | WG                               | 388 |
| AgamGr17   | ----- | WT                               | 345 |
| AaegGr64c  | ----- | WT                               | 370 |
| DmelGr64c  | ----- | WC                               | 349 |
| DmelGr64d  | ----- | WC                               | 358 |
| AgamGr20   | ----- | YN                               | 376 |
| AaegGr61a  | ----- | YC                               | 373 |
| AgamGr21   | ----- | WC                               | 401 |
| AaegGr64a  | ----- | WS                               | 284 |
| DmelGr64a  | ----- | WC                               | 395 |
| DmelGr61a  | ----- | WT                               | 378 |
| AgamGr15   | ----- | WC                               | 382 |
| AaegGr1    | ----- | WC                               | 386 |
| DmelGr5a   | ----- | YH                               | 382 |
| DmelGr64f  | ----- | WC                               | 407 |
| DmelGr64e  | ----- | WC                               | 401 |
| AmelGr1    | ----- | FS                               | 330 |
| AmelGr2    | ----- | YS                               | 420 |
| AgamGr16   | ----- | YT                               | 352 |
| AaegGr64e  | ----- | YS                               | 373 |
| TCasGr6    | ----- | TR                               | 331 |
| TcasGr26   | ----- | TR                               | 331 |
| TcasGr33   | ----- | TR                               | 331 |
| AgamGr23   | ----- | TQ                               | 415 |
| AaegGr21a  | ----- | TQ                               | 407 |
| TcasGr10   | ----- | TR                               | 361 |
| TcasGr39   | ----- | TR                               | 361 |
| AgamGr22   | ----- | TQ                               | 380 |
| AaegGr21b  | ----- | TQ                               | 386 |
| DmelGr21a  | ----- | TQ                               | 387 |
| AgamGr24   | ----- | AQ                               | 311 |
| AaegGr63a  | ----- | AQ                               | 376 |
| DmelGr63a  | ----- | AQ                               | 405 |
| TcasGr3    | ----- | AQ                               | 367 |
| DmelOr83b  | ----- | A                                | 438 |
| AgamOr7    | ----- | A                                | 430 |
| HvirOr2    | ----- | A                                | 424 |
| TcasOr16   | ----- | A                                | 526 |
| TcasOr22   | ----- | A                                | 565 |
| AmelOr2    | ----- | A                                | 430 |
| TcasGr31   | ----- |                                  |     |
| TcasGr35   | ----- |                                  |     |
| DmelGr59c  | ----- | TLFYRELDNRLE                     | 343 |
| DmelGr92a  | ----- | VGDL SKFQ                        | 332 |
| DmelGr28a  | ----- | ITDDPELR                         | 379 |
| DmelGr64b  | ----- | AWS                              | 343 |
| TcasGr71   | ----- | NEK                              | 296 |
| AgamGr19   | ----- | WC                               | 338 |
| AaegGr64b  | ----- | WC                               | 286 |
| DmelGr93d  | ----- | HWM                              | 324 |
| TcasGr34   | ----- | AQK                              | 273 |
| TcasGr43   | ----- | MEEK                             | 303 |
| TcasGr47   | ----- | DK                               | 272 |
| AmelGr3    | ----- | IR                               | 392 |
| AgamGr32b  | ----- | VELN                             | 364 |
| AgamGr50   | ----- | QARQIIPCLSMYTGRITDVPD            | 353 |
| TcasGr20   | ----- | DIK                              | 338 |
| TcasGr79   | ----- | KK                               | 297 |
| TcasGr15   | ----- | VEYKNVEFWRNIR                    | 340 |
| TcasGr60   | ----- | R                                | 290 |
| AgamGr38   | ----- | AELIEMCAQLCFASDFVFLVFGLISTLCESVK | 373 |
| TcasGr51   | ----- | FRNS                             | 718 |
| DmelGr39b  | ----- | RETSYK                           | 319 |
| AgamGr28   | ----- | KAATVGEDQ                        | 329 |
| TcasGr61   | ----- | SLE                              | 614 |

|           |                                         |     |
|-----------|-----------------------------------------|-----|
| TcasGr50  | -----                                   |     |
| AgamGr12  | -----LNTQRVEARKW                        | 326 |
| AgamGr36  | -----VVDSSTK                            | 343 |
| AgamGr48  | -----AWLDTRTE                           | 349 |
| AgamGr49a | -----RVE                                | 349 |
| AgamGr49b | -----EFLPTDPNPRVE                       | 353 |
| DmelGr2a  | -----NESHN                              | 353 |
| DmelGr32a | -----EYQ                                | 398 |
| DmelGr68a | -----KSKQFQ                             | 328 |
| AmelGr7   | -----FATKEFQ                            | 351 |
| AmelGr8   | -----DQII                               | 343 |
| AmelGr9   | -----TDPMVR                             | 337 |
| TcasGr57  | -----EIPTMPVSIKDQTIK                    | 338 |
| TcasGr41  | -----ICYKLLSNLGFPKTTNEQLLR              | 344 |
| AgamGr34  | -----GSRYSSEE                           | 363 |
| AgamGr35  | -----MKHSQV                             | 380 |
| AgamGr39  | -----AAIY                               | 358 |
| AgamGr40  | -----YYDMP                              | 337 |
| AaegGr28d | -----RYDRRVV                            | 344 |
| AgamGr42  | -----KTPAL                              | 364 |
| AgamGr41  | -----NVITFKLVHRIINTNVVEI                | 386 |
| AgamGr43  | -----YFIDDQALFER                        | 368 |
| DmelGr33a | -----KKPAFMLSNDLFY                      | 413 |
| AgamGr44  | -----MDHKLLK                            | 344 |
| AgamGr13  | -----DRYFH                              | 347 |
| AgamGr45  | -----VYGPCQR                            | 379 |
| AgamGr46  | -----TPLS                               | 370 |
| Dmelr93a  | -----WD                                 | 355 |
| AmelGr6   | -----FSSNGMQGQYKNFH                     | 387 |
| AmelGr10  | -----LLFVQANRVGELIF                     | 327 |
| TcasGr28  | -----                                   |     |
| TcasGr40  | -----AAAV                               | 325 |
| AgamGr3   | -----LDAEMV                             | 325 |
| AgamGr4   | -----DSTFR                              | 363 |
| AgamGr6   | -----QTTI                               | 357 |
| AgamGr7   | -----DEADLLA                            | 366 |
| AgamGr47  | -----HFSVDVI                            | 349 |
| DmelGr8a  | -----DLS                                | 329 |
| AgamGr5   | -----QALF                               | 377 |
| AgamGr8   | -----CDQGW                              | 317 |
| DmelGr9a  | -----QTPVER                             | 288 |
| DmelGr59f | -----KDIQ                               | 340 |
| DmelGr77a | -----ITVKQLR                            | 394 |
| DmelGr85a | -----VNLE                               | 343 |
| TcasGr27  | -----K                                  | 291 |
| TcasGr48  | -----ADSFCK                             | 318 |
| AgamGr1   | -----TQNVECE                            | 334 |
| DmelGr10a | -----REMDERLT                           | 354 |
| DmelGr59e | -----RLQ                                | 331 |
| DmelGr10b | -----SRTTY                              | 319 |
| DmelGr89a | -----LTQE                               | 303 |
| DmelGr57a | -----DWFPPQK                            | 342 |
| DmelGr47b | -----VAR                                | 336 |
| DmelGr58a | -----HLELVKRDFH                         | 338 |
| DmelGr58b | -----KVGPKMQ                            | 336 |
| DmelGr98a | -----QLN                                | 319 |
| AaegGr93a | -----IVCLDSR                            | 345 |
| TcasGr19  | -----T                                  | 310 |
| DmelGr47a | -----RLD                                | 307 |
| DmelGr58c | -----CIKSSGTTLSRKLKLE                   | 356 |
|           |                                         |     |
| TcasGr38  | DEIEMFSLQIANEQ--VEFNAAGFFPINYTLVFS----- | 389 |
| TcasGr46  | DKIEMFSLQILNER--AGFSAAGFFPIDYSLVFS----- | 710 |
| TcasGr1   | DKIEMFSLQILNER--AEFNAAGFFPIDYTLVFS----- | 369 |
| TcasGr123 | DEIEMFSLQIANEQ--VEFNAAGFFAINYTLVFS----- | 362 |
| TcasGr62  | DEIEMFSLQIANEQ--VEFNAAGFFAINYTLVFS----- | 637 |
| TcasGr25  | IRPGDTPLEDINPD--LAEAFSSYARKNARLSFG----- | 261 |
| TcasGr59  | IRPGDTPLEDINPD--LAEAFSSYARKNARLSFG----- | 436 |
| AgamGr2   | EVVNHLSLKLNLHQ--LNFSAAGFFDLDMTTLYA----- | 390 |



|            |                                                              |     |
|------------|--------------------------------------------------------------|-----|
| AaegGr66a  | QIVNHLSLKLLNHQ---LNF SACGFFDLDMTTLYA-----                    | 452 |
| DmelGr66a  | EIVNHLSLKLLNHS---VDFSACGFFTLDMETLYG-----                     | 466 |
| TcasGr11   | NN-----                                                      | 339 |
| TcasGr55   | NNVQSYSLQLLHQK---VQF SVLGFFVVDYTLTLYS-----                   | 369 |
| TcasGr21   | NSTEFDNATESY-----                                            | 386 |
| TcasGr56   | -----                                                        |     |
| AaegGr     | KQLTNLSLQMTHRK---VAFTAYGFFKLDFTLLFT-----                     | 408 |
| AaegGr28a  | -----                                                        |     |
| AgamGr33   | GKLMHLSLQMLHRK---VRF SACGLFSLDFSLIFT-----                    | 406 |
| DmelGr28bB | EKLQQFSMQLMHLK---INF TAAGLFNIDRTLYFT-----                    | 401 |
| DmelGr28bC | EKLQQFSMQLMHLK---INF TAAGLFNIDRTLYFT-----                    | 428 |
| DmelGr28bD | EKLQQFSMQLMHLK---INF TAAGLFNIDRTLYFT-----                    | 398 |
| DmelGr28bA | EKLQQFSMQLMHLK---INF TAAGLFNIDRTLYFT-----                    | 410 |
| DmelGr28bE | EKLQQFSMQLMHLK---INF TAAGLFNIDRTLYFT-----                    | 405 |
| AgamGr25   | ESINMFWQQLIASN---FSFTACGLCTIDRRIITS-----                     | 429 |
| AaegGr43a  | -----                                                        |     |
| DmelGr43a  | EAVKKFWQQLLVVD---ADFSACGLCRVNRITLTS-----                     | 407 |
| AgamGr37b  | -QLNLF SQQLLHRS---PVIT-CGLFVYDWTWYT-----                     | 344 |
| AgamGr37d  | -QLNLF SQQLLHRS---PVIT-CGLFVYDWTWYT-----                     | 340 |
| AgamGr37a  | -QLNLF SQQLLHRS---PVIT-CGLFVYDWTWYT-----                     | 354 |
| AgamGr37c  | -QLNLF SQQLLHRS---PVIT-CGLFVYDWTWYT-----                     | 348 |
| AgamGr37e  | -QLNLF SQQLLHRS---PVIT-CGLFVYDWTWYT-----                     | 348 |
| AgamGr37f  | -QLNLF SQQLLHRS---PVIT-CGLFVYDWTWYT-----                     | 375 |
| AaegGr28c  | NELNIFSQQLLHRS---PVIT-CGLFVYDWTLLYT-----                     | 538 |
| AaegGr28b  | DELMLFSSFLAHKK---IVVN-CYIFVCDWTLGMS-----                     | 387 |
| AaegGr28e  | DELMLFSSFLAHKK---IVVN-CYIFVCDWTLGMS-----                     | 387 |
| TcasGr14   | RHLQLVAIRLLNTK---LQFTAKDFFNLDWTFCHM-----                     | 357 |
| TcasGr49   | RHLQLVAIRLLNTK---LQFTAKDFFNLDWTFCHM-----                     | 401 |
| AmelGr4    | KELKQFSFQLLHQK---IIFSTNGYFTLDNKFFQS-----                     | 382 |
| AmelGr5    | IELEQFSLQLLHQK---VQFTANGYFTLDNTLTFQS-----                    | 381 |
| TcasGr16   | NEVISSALKLSQNE---LEITACKFFSIDNALLFSANSTKKLIVKIRIDIDKEDERNEII | 394 |
| TcasGr22   | NVVVTSVLKLMQNK---LEITACRLFSIDNALLFS-----                     | 272 |
| TcasGr17   | NS-----HCLGGT---ITRTMW-----YFQ-----                          | 341 |
| TcasGr150  | NSVVASVLQLMENK---IETACRLFNIDNALLFA-----                      | 356 |
| TcasGr32   | QDLISTIKDN---F---PRFYAARFFVINRGTILG-----                     | 334 |
| TcasGr54   | QDLISTIKDN---F---PRFYAARFFVINRGTILG-----                     | 334 |
| TcasGr37   | NDFVTALKDN---V---PVFAAARFYAINRSTIFR-----                     | 309 |
| TcasGr53   | NDFVTALKDN---V---PVFAAARFYAINRSTIFR-----                     | 309 |
| TcasGr5    | KMFVKIVDAS---C---RNFTAARFFELNRRITLG-----                     | 321 |
| TcasGr12   | DELIVTSLSTHY--F---PVFSACDYFTIETKTVDL-----                    | 294 |
| TcasGr13   | DELIVTSLSAHY--F---PVFSACDYFTIETKTVDL-----                    | 368 |
| TcasGr104  | TELFKLAQHVSANI---VHITAGNYFEINKATLCG-----                     | 358 |
| TcasGr45   | TELFKLAQHVSANI---VHITAGNYFEINKATLCG-----                     | 358 |
| TcasGr98   | QELYMAAQVIEKSV---ANFTAARFFVDFVCRSTLFG-----                   | 355 |
| TcasGr52   | KELLRFASESRGSV---AKFTAADFFEIDRGTFFG-----                     | 292 |
| TcasGr105  | RELLRLAQQVNANI---AQITANFFDISRSTFLG-----                      | 338 |
| TcasGr4    | -----EVQSRS---NRMTPLKLQPQNF SI-----                          | 309 |
| TcasGr44   | -----EVQSRS---NRMTPLKLQPQNF SI-----                          | 313 |
| AgamGr9a   | KQIQNFLLKNLHQK---KKFSACGFFDIDNTVIYM-----                     | 357 |
| AgamGr9c   | KQIQNFLLKNLHQK---KKFSACGFFDIDNTVIYM-----                     | 356 |
| AgamGr9b   | KQIQNFLLKNLHQK---KKFSACGFFDIDNTVIYM-----                     | 407 |
| AgamGr9d   | KQIQNFLLKNLHQK---KKFSACGFFDIDNTVIYM-----                     | 363 |
| AgamGr9e   | KQIQNFLLKNLHQK---KKFSACGFFDIDNTVIYM-----                     | 359 |
| AgamGr9f   | KQIQNFLLKNLHQK---KKFSACGFFDIDNTVIYM-----                     | 356 |
| AgamGr9g   | KQIQNFLLKNLHQK---KKFSACGFFDIDNTVIYM-----                     | 359 |
| AgamGr9i   | KQIQNFLLKNLHQK---KKFSACGFFDIDNTVIYM-----                     | 360 |
| AgamGr9h   | KQIQNFLLKNLHQK---KKFSACGFFDIDNTVIYM-----                     | 365 |
| AgamGr9j   | KQIQNFLLKNLHQK---KKFSACGFFDIDNTVIYM-----                     | 396 |
| AgamGr9l   | KQIQNFLLKNLHQK---KKFSACGFFDIDNTVIYM-----                     | 386 |
| AgamGr9k   | KQIQNFLLKNLHQK---KKFSACGFFDIDNTVIYM-----                     | 378 |
| AgamGr9m   | KQIQNFLLKNLHQK---KKFSACGFFDIDNTVIYM-----                     | 381 |
| AgamGr9n   | KQIQNFLLKNLHQK---KKFSACGFFDIDNTVIYM-----                     | 348 |
| AgamGr10   | KQIQKFLKLNLRQK---KKFSACGFFDIDNTVIYM-----                     | 348 |
| AgamGr11   | TQIHRFLLQNLNRK---INF SVCGMFIDIDYAMIHM-----                   | 353 |
| DmelGr23aA | DLVSEFSLQTLHQR---FVVTAKDFFSLNLHLLSS-----                     | 343 |
| DmelGr23aB | DLVSEFSLQTLHQR---FVVTAKDFFSLNLHLLSS-----                     | 347 |
| DmelGr39aA | RMIEKFLKLNLRQK---PILTAYGFFALDKSTLFFK-----                    | 344 |
| DmelGr39aB | RMIEKFLKLNLRQK---PILTAYGFFALDKSTLFFK-----                    | 353 |
| DmelGr39aC | RMIEKFLKLNLRQK---PILTAYGFFALDKSTLFFK-----                    | 353 |
| DmelGr39aD | RMIEKFLKLNLRQK---PILTAYGFFALDKSTLFFK-----                    | 343 |

|            |                                                              |       |
|------------|--------------------------------------------------------------|-------|
| DmelGr98c  | MGLKEYIILQMQLK---LLFTCGGLFDINIKLFGG-----                     | 375   |
| DmelGr98d  | MGLREYSLOMEHLK---LIFTCGGLFDINLKFFGG-----                     | 373   |
| DmelGr98b  | RGLREYSLOMEHLK---LRFTCGGLFDINLKYFGG-----                     | 373   |
| AgamGr51   | RLIEVLMVDYMQRN---NAINNYGMYAMNRALLFG-----                     | 388   |
| AgamGr52   | RMLDFITLDMYQRD---YDVRNYGLYDINRALLFG-----                     | 383   |
| DmelGr94a  | QAVHGFTLLVTVTK---YQIKPLGLYELDMRLISN-----                     | 380   |
| DmelGr97a  | QVVNAFWLQVVTIN---YKLMPLGLLELNTSLVNK-----                     | 401   |
| DmelGr93b  | QKLELFLGRLQHQE---LRVFPGLGLFEVSNELTLF-----                    | 379   |
| DmelGr93c  | MKWEMFLSRLNFFE---FRVRPLGLFEVSNEVILL-----                     | 375   |
| DmelGr22d  | ISISDFALYCSHRR---FKFLHCGLFHVNRMGFK-----                      | 367   |
| DmelGr22e  | RSITDFALFCSHRR---LRFHHCGLFYVNYEMGFR-----                     | 369   |
| DmelGr22a  | RRVAEFTLFCSHRR---LKVCHLGLLDINYEMGFR-----                     | 369   |
| DmelGr22b  | MSVNEFAWLCSHRK---FRFQLCGLFSMNCRMGFK-----                     | 366   |
| DmelGr22c  | RSVNEFALLCGHCQ---FNFHVCGLFTINYKMGFQ-----                     | 363   |
| DmelGr22f  | RSLNEFAWLCSTRK---FRFQLCGLFSINHNMGFQ-----                     | 358   |
| DmelGr36a  | QSFESIQLQLIRNP---LKIEVLDIFTITRSSAA-----                      | 371   |
| DmelGr36c  | EAFENLNLQLIRNP---LKITVVKLYDVRNNTMA-----                      | 370   |
| DmelGr36b  | ESFESLQLQLARNP---LKITVVKLYDVRNNTMA-----                      | 371   |
| DmelGr59d  | MVFENFALNLVRNP---LKLHMYGLFEFGRGTSFA-----                     | 370   |
| DmelGr59a  | NELSSYLIYESSTR---LDLLVCGLYRVNKRKWLQ-----                     | 344   |
| DmelGr59b  | KEISSYVIYANSTK---LQLWSCGLFQANRSMWFA-----                     | 345   |
| AgamGr26   | AKFSSQLLHVQGPQ-----TACGVINLEMTLIST-----                      | 396   |
| AgamGr27   | MKFAGQLLLHLHGKR---HHCKACGLITLDTLISK-----                     | 383   |
| AgamGr29   | RFITQTTFLFLEKAH-----EAYGMISIDMTLILS-----                     | 392   |
| AgamGr31   | RFISQTTFLFLANGH-----EAYSMSIDMTLILS-----                      | 393   |
| AgamGr30   | YFMQVS--NLQDTH-----QACGMIKLDMQLVNP-----                      | 382   |
| AgamGr32a  | -----                                                        | ----- |
| TcasGr2    | LEIQRFIIQIGNSD---IAITGKNFFSITRGLILSFVDYFVFLCSILVNI AFIKLATEW | 418   |
| TcasGr9    | KEISRLVETL-----KFQSITS-----                                  | 379   |
| TcasGr7    | LEIQRFIHQIGTLE---VAFTGKNFFSITRGLILSIAG-----                  | 398   |
| TcasGr30   | ---QRFIHQIGTLE---VAFTGKNFFSITRGLILSIAG-----                  | 363   |
| TcasGr29   | LEIQRFIHQIGTLE---VAFTGKNFFSITRGLILSIAG-----                  | 398   |
| AaegGr64f  | LDIQRLLDHASLKS---IAFSGKRFFFITRPLILAMAG-----                  | 355   |
| AaegGr64a3 | -----                                                        | ----- |
| AgamGr14   | LDLRRLCDAVATSE---NALSCKRFFVRRPLILA-----                      | 416   |
| AgamGr18   | IDLQRLTDEVASGE---NVLGKQFFFLKRQILAMAG-----                    | 391   |
| AaegGr64d  | LDLQRLTDDVASGE---NTLSGKGFYFLKRQILAMAG-----                   | 423   |
| AgamGr17   | IDVQRFTQELLSGR---NCLSGHGFFFLNRSVILAMAG-----                  | 380   |
| AaegGr64c  | TSVQRFTNEILNIE---NALSCHKFFFLKRGILAMAG-----                   | 405   |
| DmelGr64c  | VELRRLNEIFLSDH---FALSGKGYFLLTRRLIFAMAA-----                  | 384   |
| DmelGr64d  | DELGRLESEMLRNET---FALSGMGYFYVTRRLIFAMAG-----                 | 393   |
| AgamGr20   | DELEILRICSSGG---VSI SGMGFFITRIFLT MAG-----                   | 410   |
| AaegGr61a  | DELQRVQMYRRG---VSLTGMGVFLVSRRIFLT IAG-----                   | 407   |
| AgamGr21   | VELERFSTQLKSEK---VALSGMGFFSLTRQLLFSMAG-----                  | 436   |
| AaegGr64a  | VELDRFSSQLKSET---VALSGMGFFHITRQLLFSMAG-----                  | 319   |
| DmelGr64a  | VEVERLIFQMTTQT---VALSGKKFYFLTRRLFLGMAG-----                  | 430   |
| DmelGr61a  | QEVQRFADQLTSEF---VGLSGYRLFCLTRKSLFGMLA-----                  | 413   |
| AgamGr15   | LEAKRFAEEVTTDT---VALTGLKFFSMTRQLVLNVTG-----                  | 417   |
| AaegGr1    | VEAKRFAEEVINDT---VALTGMKFFNMTRKLVKVTG-----                   | 421   |
| DmelGr5a   | PEVFRFAEELASDQ---VALTGLKFFNVTRKFLFLAMAG-----                 | 417   |
| DmelGr64f  | PEVKRFTEEVI SDE---VALTGMKFFHLTRKLVLSVAG-----                 | 442   |
| DmelGr64e  | DELKRFSEEVQMDN---VALTGMKFFRLTRGVVISVAG-----                  | 436   |
| AmelGr1    | TEVMRFLSQVT TDN---ICLTGMKFFSVTRSLVLT VAG-----                | 365   |
| AmelGr2    | VEVQRLQCQLATDD---IALTGLRFFFSITRNFLAVAG-----                  | 455   |
| AgamGr16   | DEVQRFHRQVEHDS---VALNGYGFYFLTRKILKIAA-----                   | 387   |
| AaegGr64e  | KEVQRFHQQMENET---VALSGFRFFHLTRKILKISG-----                   | 408   |
| TCasGr6    | KEIDIFLVAIQMNP---PKVSLKGYTVVNRELVTASVA-----                  | 366   |
| TcasGr26   | KEIDIFLVAIQMNP---PKVSLKGYTVVNRELVTASVA-----                  | 366   |
| TcasGr33   | KEIDIFLVAIQMNP---PKVSLKGYTVVNRELVTASVA-----                  | 366   |
| AgamGr23   | KEIDLFIQAIEMNP---AIVSLKGYAEVNRELLTSSIA-----                  | 450   |
| AaegGr21a  | KEIDLFIQAIEMNP---AIVSLKGYAEVNRELLTASIA-----                  | 442   |
| TcasGr10   | QEVHMFMAIEKNP---PIMNLNGYANVNRLKLISSVT-----                   | 396   |
| TcasGr39   | QEVHMFMAIEKNP---PIMNLNGYANVNRLKLISSVT-----                   | 396   |
| AgamGr22   | KEVEMFLVAIDKNP---PTMNLGDYANINRGLITSNIS-----                  | 415   |
| AaegGr21b  | KEVEMFLVAIDKNP---PTMNLGDYANINRGLITSNIS-----                  | 421   |
| DmelGr21a  | KEVEMLLVAINKNP---PIMNLGDYANINRELITTNIS-----                  | 422   |
| AgamGr24   | TEINMFLRATMNP---SSINLGGFFDVNRTLFKSLLA-----                   | 346   |
| AaegGr63a  | TEINMFLRATMNP---SSINLGGFFDVNRTLFKSLLA-----                   | 411   |
| DmelGr63a  | TEINMFLRATMNP---STINCGGFFDVNRTLFKGLLT-----                   | 440   |
| TcasGr3    | QEINMFLKATEMSP---TDISLVGFFDVNRNLFKSLLA-----                  | 402   |

|           |                                                     |     |
|-----------|-----------------------------------------------------|-----|
| DmelOr83b | KTFVQIVCQQCQKA---MSISGAKFFTVSLDLFASVLG-----         | 473 |
| AgamOr7   | KTFVQIVCQQCQKA---MTISGAKFFTVSLDLFASVLG-----         | 465 |
| HvirOr2   | KTFVQIVCQQCQKA---MSISGAKFFTVSLDLFASVLG-----         | 459 |
| TcasOr16  | KTFVQIVCQQCQKA---MSISGAKFFTVSLDLFASVLG-----         | 561 |
| TcasOr22  | KTFVQIVCQQCQKA---MSISGAKFFTVSLDLFASVLG-----         | 600 |
| AmelOr2   | KTFVQIVCQQCQKA---MSISGAKFFTVSLDLFASVLG-----         | 465 |
| TcasGr31  | -KVLPLLSVSSSS---YNCEVLFVSLIDQF-----                 | 250 |
| TcasGr35  | DEVQIFIDVVQHNR---PEFKAARFFSIDRSTLFS-----            | 233 |
| DmelGr59c | AAFENFQLQLASNR---HEFVYMGLFKMERGRLIA-----            | 375 |
| DmelGr92a | TTLDTLFLHLRLGH---FRVSILGLFDVDTQMQLYQ-----           | 364 |
| DmelGr28a | DRLFRSLQLSHRK---VLFSAAGLFRDLRDLIFT-----             | 411 |
| DmelGr64b | IEVQRFSEQLGNDT---TALSGSGFFYLTRSLVLAMG-----          | 377 |
| TcasGr71  | KNISEFINVVLNNY---PDFSAAGFFSINKTTLLQ-----            | 328 |
| AgamGr19  | SELERFYSFIRKSS---IAINAMGLFRLTKKTMLTMLG-----         | 373 |
| AaegGr64b | TELERYYLQLRAEV---GALSGSRFFYLTHQTFT-----             | 318 |
| DmelGr93d | KSVEIFVTHLNLSE---FRVNLLGLFNVSNELFLIIVS-----         | 359 |
| TcasGr34  | LRHKFDLKTLLVNF---PKFTAAGFFDHVKKSTIFS-----           | 305 |
| TcasGr43  | QELYEFSNFVSQLH---PKFSAANFFDIERSTILS-----            | 335 |
| TcasGr47  | NKLGDFVALIRDAQ---VKITAADFFILDKSTILK-----            | 304 |
| AmelGr3   | RELEIFSLQLLHRP---LEFSACGLFSLDRNLITS-----            | 424 |
| AgamGr32b | EAIEHFISQISNLH---DVHQACGMLNLDKMLISN-----            | 396 |
| AgamGr50  | RAIELLTIEYLNDR---YAIRIKGLFTIDNTMLFG-----            | 385 |
| TcasGr20  | EQVEILAVQVSNKK---IKFSSFGMLKISRSLLS-----             | 370 |
| TcasGr79  | CCEKCGLKKIEFCR---PTFSAARFYIDFSNTFLG-----            | 330 |
| TcasGr15  | EDYDRLARLTQFLD---KELSYLILFSIGFNCFWVMKLLYNVLRFG----- | 383 |
| TcasGr60  | FEITALRLFTIDNK---LLFGVLAYYSTTCDIATILDFWVR-----      | 328 |
| AgamGr38  | LTLRLMFLMQLGHR---SPMITCGLFPFDWTLIFS-----            | 405 |
| TcasGr51  | DELIKFISIAKHNV---RTFSAGGFFDIRKNLIFS-----            | 750 |
| DmelGr39b | DLLMEFILQVEQNV---LAINAEGFMSTDNSLLMS-----            | 351 |
| AgamGr28  | QMALLRLLTLGRKR---IVPTACGLLKLLESLSLSS-----           | 361 |
| TcasGr61  | EKLQIFALQLTHRA---PTFTALGLFKINGSFAFT-----            | 646 |
| TcasGr50  | --VNKLIFRSNDPK---VTLELCGMISTYLIIMIQ-----            | 331 |
| AgamGr12  | VDRFLLQKLSQTNQ---QRFMAGGLFVLDNKLIVCT-----           | 358 |
| AgamGr36  | RKLIWFSQQLFRR---PKLR-CIFYAYDWKTIYN-----             | 374 |
| AgamGr48  | RSIELFTLAVLTTD---ARIKIGGMYVLNMAFVFS-----            | 381 |
| AgamGr49a | RCIESFAIELLHED---FKINNCGMYDVDYTLMFS-----            | 381 |
| AgamGr49b | RCIESFAIELLHED---FKINNCGMYDVDYTLMFS-----            | 385 |
| DmelGr2a  | ALITQFSLQLLHQR---LHFSAAAGFFNVDCITLLYT-----          | 385 |
| DmelGr32a | NIIDKFLTKSIKQE---VQFTAYGFFAIDNSTLFLK-----           | 430 |
| DmelGr68a | NLIDKFLTKSIKQD---LQFTAYGFFSIDNSTLFLK-----           | 360 |
| AmelGr7   | AEIRDFTLQLIQNP---VVFAYGFFNLDHDSFIQG-----            | 383 |
| AmelGr8   | TELELFSLEVLQKD---NKFIMFG-LEMDLTLVTD-----            | 374 |
| AmelGr9   | REVHLFSLQIMHRN---NKFTAKTFDMSVLLGQ-----              | 368 |
| TcasGr57  | EELALLAQSTSRST---SKFSAAGFFVDFVTLG-----              | 370 |
| TcasGr41  | KELLLFAEQMGQRQ---VAFKVGGLFNIDYGTLYS-----            | 376 |
| AgamGr34  | VIKLTVPFQAPNKV---FKFSAMGFFQIDCNMLCG-----            | 395 |
| AgamGr35  | AQHSSIWFPNLISS---VRFSAAGFFFTINYNMLSG-----           | 412 |
| AgamGr39  | NDCGSQIIEQLSHG---IPKASCYFYDIDWTFLLS-----            | 390 |
| AgamGr40  | LLQIKFLSQQLRSV---APRVSCLLFDFEWPFLVS-----            | 369 |
| AaegGr28d | KELGTFYSYQLYHHT---PKVS-CRLFLDWTLLYT-----            | 375 |
| AgamGr42  | VERLVLFSHHLQHQR---RPVSCGLFCFDWTLALS-----            | 396 |
| AgamGr41  | EDLLQQFSEQMNR---SPSVDFRFFDWDWPLLVK-----             | 418 |
| AgamGr43  | SKAIALQLLHRKRF---SLFDGSGFLRDLFTFIFS-----            | 400 |
| DmelGr33a | NKMKSFLLQFLHWEG---FFQFNGVGLFALDYTFIFS-----          | 447 |
| AgamGr44  | QSIEVFALQTLHQP---IEFTACRMFTLDYTVLFS-----            | 376 |
| AgamGr13  | ATINTFLLSLNHSM---LKINIAGMFTMDFELLTG-----            | 379 |
| AgamGr45  | INFRTVTLALLFST---FIFYSHSNTLFDIFSRTTS-----           | 412 |
| AgamGr46  | DHVRLLSLQLHQR---IEFTASGLFTIDHGLMFN-----             | 402 |
| DmelGr93a | KSVETFLGQLQTR---LEIKVLGFFHLLNNEFILL-----            | 387 |
| AmelGr6   | TKQDSFRTSLYLLNR---RLRFSAAGGLFDIKLSLLCS-----         | 421 |
| AmelGr10  | SPYSSVSLKRVHLQ---ENIEAAAYFQLRKVHLFT-----            | 359 |
| TcasGr28  | -----                                               |     |
| TcasGr40  | EHILSIVNTCSQIPS---EVEDKYTTYFLNTYPHLFN-----          | 359 |
| AgamGr3   | KLRFYFLHQLLRNR---IKLTAKDIFDYDYTLIRT-----            | 357 |
| AgamGr4   | KIIYRFGQLIAQQR---IRLTAHGLFEINYSLLKMFG-----          | 397 |
| AgamGr6   | TLIENFSKQLDNEQ---INFSAANFFDIRLSSLT-----             | 389 |
| AgamGr7   | KMLNFSLLQHTP---MSFSLGGFFDMDFVLLKE-----              | 398 |
| AgamGr47  | EKLSTLSLQVTMRD---MSFSCGLFNFDWNLFSG-----             | 380 |
| DmelGr8a  | LQIQNFSLQLLHQP---IRIDCLGLTILDCLSLTR-----            | 361 |
| AgamGr5   | TRIESFLQQTQFES---IQLTAGDFFDLNFSPLT-----             | 409 |



|            |                                         |     |
|------------|-----------------------------------------|-----|
| TcasGr12   | -----VLGVTVTYLVIIQFDDKIVQV-----         | 316 |
| TcasGr13   | -----VLGVTVTYLVIIQFDDKIVQV-----         | 390 |
| TcasGr104  | -----IFGTTTTYFIVILQFNQSSAK-----         | 379 |
| TcasGr45   | -----IFGTTTTYFIVILQFNQSSAK-----         | 379 |
| TcasGr98   | -----ILATTTTTYLIVTIQFNQGLNK-----        | 376 |
| TcasGr52   | -----ILSTTTSYFIIMIQFNMSL-----           | 311 |
| TcasGr105  | -----ILATITTYFIVIIIEFGF-----            | 355 |
| TcasGr4    | -----                                   |     |
| TcasGr44   | -----                                   |     |
| AgamGr9a   | -----VFSSIVTYLVILIQFKQLETD-LTQAGDGYNV   | 388 |
| AgamGr9c   | -----VFSSIVTYLVILIQFKQLETD-LTQAGDGYNV   | 387 |
| AgamGr9b   | -----VFSSIVTYLVILIQFKQLETD-LTQAGDGYNV   | 438 |
| AgamGr9d   | -----VFSSIVTYLVILIQFKQLETD-LTQAGDGYNV   | 394 |
| AgamGr9e   | -----VFSSIVTYLVILIQFKQLETD-LTQAGDGYNV   | 390 |
| AgamGr9f   | -----VFSSIVTYLVILIQFKQLETD-LTQAGDGYNV   | 387 |
| AgamGr9g   | -----VFSSIVTYLVILIQFKQLETD-LTQAGDGYNV   | 390 |
| AgamGr9i   | -----VFSSIVTYLVILIQFKQLETD-LTQAGDGYNV   | 391 |
| AgamGr9h   | -----VFSSIVTYLVILIQFKQLETD-LTQAGDGYNV   | 396 |
| AgamGr9j   | -----VFSSIVTYLVILIQFKQLETD-LTQAGDGYNV   | 427 |
| AgamGr9l   | -----VFSSIVTYLVILIQFKQLETD-LTQAGDGYNV   | 417 |
| AgamGr9k   | -----VFSSIVTYLVILIQFKQLETD-LTQAGDGYNV   | 409 |
| AgamGr9m   | -----VFSSIVTYLVILIQFKQLETD-LTQAGDGYNV   | 412 |
| AgamGr9n   | -----VFSSIVTYLVILIQFKQLETD-LTQAGDGYNV   | 379 |
| AgamGr10   | -----VFSSIVTYLVILIQFKQLETD-LTQSGDGYNV   | 379 |
| AgamGr11   | -----VLSSIFTYLVILVQFDQLQPERLSYLNTLNT    | 385 |
| DmelGr23aA | -----MFAAVVTYLVILIQFMFAERS--STRGSG---   | 370 |
| DmelGr23aB | -----MFAAVVTYLVILIQFMFAERS--STRGSG---   | 374 |
| DmelGr39aA | -----LFTAIFTYMVILVQFKEMENS--TKSINKF--   | 372 |
| DmelGr39aB | -----LFTAIFTYMVILVQFKEMENS--TKSINKF--   | 381 |
| DmelGr39aC | -----LFTAIFTYMVILVQFKEMENS--TKSINKF--   | 381 |
| DmelGr39aD | -----LFTAIFTYMVILVQFKEMENS--TKSINKF--   | 371 |
| DmelGr98c  | -----MLVTLCGYVIIIVQFKIQDFA--LIGYRQNTS   | 405 |
| DmelGr98d  | -----MVVTLFGYIIILVQFKIQFFA--QSNFMQNIN   | 403 |
| DmelGr98b  | -----LLVTIFGYIIILIQFKVQAIA--ANRYKKVVN   | 403 |
| AgamGr51   | -----MIATMTSYLIILIQFHIQAYE-----         | 409 |
| AgamGr52   | -----TIATVTSYVILVQFHMQQYG-----          | 404 |
| DmelGr94a  | -----VFSAVASFLILVQADLSQRFKMQ-----       | 404 |
| DmelGr97a  | -----VFSASIGSLILIQSDLTRFSLK-----        | 425 |
| DmelGr93b  | -----FLSAMVTYLVFLVQYGMQSQQI-----        | 401 |
| DmelGr93c  | -----FLSSMITYFTYVVQYGIQTNRL-----        | 397 |
| DmelGr22d  | -----MFVASVLYLLVQFDYMNL-----            | 387 |
| DmelGr22e  | -----MAITSFLYLLFLIQFDYWNL-----          | 389 |
| DmelGr22a  | -----MIITNLYVVFLVQFDYMNLFKFTD-----      | 394 |
| DmelGr22b  | -----MIITFLYLVYLVQFDYMNL-----           | 386 |
| DmelGr22c  | -----MIITSFLYLYMIQFDFMNL-----           | 383 |
| DmelGr22f  | -----MIITSFLYLVYLLQFDFMNL-----          | 378 |
| DmelGr36a  | -----MIGSIITNSIFLIQYDMEYF-----          | 391 |
| DmelGr36c  | -----MFGNLITHSIFLIQYDIEHF-----          | 390 |
| DmelGr36b  | -----MCASVIVNSIFLIQFDMEFF-----          | 391 |
| DmelGr59d  | -----VFNSSLTHSLLLQYDVQNF-----           | 390 |
| DmelGr59a  | -----MVGSIIVHSSMLFQFHLVMRGGL-----       | 367 |
| DmelGr59b  | -----MISSVLYYILVLLQFHLVMRK-----         | 366 |
| AgamGr26   | -----MVGALTTYLVILIQFDTAITQGGTADSNPSS    | 428 |
| AgamGr27   | -----IVAGLTTYLMILIQFDSAFTQGSR-----      | 407 |
| AgamGr29   | -----NVGGLTNILVVLVQFADAKPSPN-----       | 415 |
| AgamGr31   | -----IVAGLTNILVVLVQFSDGKPCSN-----       | 416 |
| AgamGr30   | -----VIAVITSILFILMQFSDADRNDIKTVYRLDN    | 414 |
| AgamGr32a  | -----                                   |     |
| TcasGr2    | PQ-----LMKAWLKIELLVGNLGMRRNFRKKLDFIFTFI | 452 |
| TcasGr9    | -----AVVTYELIV-----IQFRKKME-----        | 396 |
| TcasGr7    | -----AIVSYELVL-----MQFNDSLL-----        | 415 |
| TcasGr30   | -----AIVSYELVL-----MQFNDSLL-----        | 380 |
| TcasGr29   | -----AIVSYELVL-----MQFNDSLL-----        | 415 |
| AaegGr64f  | -----TIITYELVL-----LDQVAKEQ-----        | 372 |
| AaegGr64a3 | -----                                   |     |
| AgamGr14   | -----                                   |     |
| AgamGr18   | -----TLVTYELVL-----LDQVKKIP-----        | 408 |
| AaegGr64d  | -----TLVTYELVL-----MDQVKQAP-----        | 440 |
| AgamGr17   | -----TLITYELVM-----LKEVNPSS-----        | 397 |
| AaegGr64c  | -----TMITYELVM-----LSEVR-HS-----        | 421 |

|           |                                          |     |
|-----------|------------------------------------------|-----|
| DmelGr64c | -----TLMVYELVL-----INQMAGSE-----         | 401 |
| DmelGr64d | -----ALMGYELVL-----FRQMGGAV-----         | 410 |
| AgamGr20  | -----SILTYELVL-----MRFHR-----            | 424 |
| AaegGr61a | -----TIITYELVL-----LSFRKRIM-----         | 424 |
| AgamGr21  | -----TIVTYELVM-----LKFDQ-----            | 450 |
| AaegGr64a | -----TIVTYELVM-----LKFDK-----            | 333 |
| DmelGr64a | -----TIVTYELVL-----LQFDE-----            | 444 |
| DmelGr61a | -----TLVTYELML-----LQIDA-----            | 427 |
| AgamGr15  | -----AIITYELVL-----IQFHKD-E-----         | 433 |
| AaegGr1   | -----SIITYELVL-----IQFHQD-E-----         | 437 |
| DmelGr5a  | -----TVATYELVL-----IQFHEDKK-----         | 434 |
| DmelGr64f | -----TIVTYELVL-----IQFHEDND-----         | 459 |
| DmelGr64e | -----TIVTYELIL-----LQFNGEK-----          | 453 |
| AmelGr1   | -----TIVTYELVL-----VQFNTTQQ-----         | 382 |
| AmelGr2   | -----AIITYEVVL-----LQFNKG-----           | 470 |
| AgamGr16  | -----TVVTYELVL-----TQVNEAEA-----         | 404 |
| AaegGr64e | -----TIVTYELVL-----LQVNDAAE-----         | 425 |
| TCasGr6   | -----TIAIYLIVL-----LQFKISLLNMR---        | 386 |
| TcasGr26  | -----TIAIYLIVL-----LQFKISLLNMR---        | 386 |
| TcasGr33  | -----TIAIYLIVL-----LQFKISLLNMR---        | 386 |
| AgamGr23  | -----TIAIYLIVL-----LQFKLSLISQQ---        | 470 |
| AaegGr21a | -----TIAIYLVVL-----LQFKLSLISQQ---        | 462 |
| TcasGr10  | -----SIATYLVML-----MQFRLTLMRN---         | 415 |
| TcasGr39  | -----SIATYLVML-----MQFRLTLMRN---         | 415 |
| AgamGr22  | -----FMATYLVVL-----MQFKLTLLRQS---        | 435 |
| AaegGr21b | -----FMATYLVVL-----MQFKLTLLRQS---        | 441 |
| DmelGr21a | -----FMATYLVVL-----LQFKITEQRR---         | 441 |
| AgamGr24  | -----TMVTYLVVL-----LQFQISIPDE---         | 365 |
| AaegGr63a | -----TMVTYLVVL-----LQFQISIPDD---         | 430 |
| DmelGr63a | -----TMVTYLVVL-----LQFQISIPTDKGDSD       | 463 |
| TcasGr3   | -----TMVTYLVVL-----LQFQISIPEE---         | 421 |
| DmelOr83b | -----AVVTYFMVL-----VQLK-----             | 486 |
| AgamOr7   | -----AVVTYFMVL-----VQLK-----             | 478 |
| HvirOr2   | -----AVVTYFMVL-----VQLK-----             | 472 |
| TcasOr16  | -----AVVTYFMVL-----VQLK-----             | 574 |
| TcasOr22  | -----AVVTYFMVL-----VQLK-----             | 613 |
| AmelOr2   | -----AMVTYFMVL-----VQLK-----             | 478 |
| TcasGr31  | -----                                    |     |
| TcasGr35  | -----VLNSLTFFLLVMIQFKEN-----             | 251 |
| DmelGr59c | -----MLSSVITHTMVLVQWEIQNDES-----         | 397 |
| DmelGr92a | -----FLSALLSGLAFIAQYRMQVGN-----          | 386 |
| DmelGr28a | -----ITGAATCYLIIILIQFRFTHMDDTSSNSTNNL    | 443 |
| DmelGr64b | -----TTIITYELMISDVINQGSIRQKTQYCREY-      | 406 |
| TcasGr71  | -----IIGNVTTFFIIIIQFNK-----              | 347 |
| AgamGr19  | -----AVITYELVMLHFAQTANQGIVRACSPEQ        | 402 |
| AaegGr64b | -----IVAVIFTYELVMIKYSRMTAADVGIPENC SAM   | 350 |
| DmelGr93d | -----AMFCYLVFVTQCVIVYRRRYVI-----         | 381 |
| TcasGr34  | -----ILNTVSTLLIVMVQFDKER-----            | 324 |
| TcasGr43  | -----VLGTACTFLIIIVQFRNS-----             | 353 |
| TcasGr47  | -----VLDTVVAFLMVVAQFQD-----              | 321 |
| AmelGr3   | -----IAGVVTTYLVILIQFNADDTKDDFDIIRNAT     | 456 |
| AgamGr32b | -----                                    |     |
| AgamGr50  | -----IVASTTSYMIILVQYYLQE-----            | 404 |
| TcasGr20  | -----FGGALTTFLVILFQYGGIHGNVY-----        | 393 |
| TcasGr79  | -----LVGAVVTFLIVLLQFQIN-----             | 348 |
| TcasGr15  | -----AESQTINFMSFGFILLRFLSVFESCRTLNNESRKP | 419 |
| TcasGr60  | -----CVLSLHCAAVGGSANIMSGCSTSTNINTKLFWLY- | 364 |
| AgamGr38  | -----ILSTAATYIIILLQFESAGSSSG-----        | 428 |
| TcasGr51  | -----LIANVAMYFVIVSQFNQNKQE-----          | 771 |
| DmelGr39b | -----ILAAKVTYLIVLMQFSSV-----             | 369 |
| AgamGr28  | -----IFVALLSFMIIILIQFDSAKLNKRDRVTAIDQ    | 393 |
| TcasGr61  | -----VVGAAATYITIIYQFQVNKPTCGP-----       | 670 |
| TcasGr50  | -----LDLARTVPKFENKNKETE-----             | 350 |
| AgamGr12  | -----ALTSMITYLIVILIQFRKYDFEDYVVTFRNDSN   | 390 |
| AgamGr36  | -----MFGFVVTYLIIILLQFDKFSDDASKKNFLTS--   | 404 |
| AgamGr48  | -----LATTVNMYLIVLVQFQLNID-----           | 401 |
| AgamGr49a | -----MIATITSYLIMLVQFQLAEI-----           | 401 |
| AgamGr49b | -----MIATITSYLIMLVQFQLAEI-----           | 405 |
| DmelGr2a  | -----IVGATTTYLIIILIQFHMSESTIGSDSNGQ---   | 414 |
| DmelGr32a | -----IFSAVTTYLVILIQFKQLEDKVEDPVPEQT-     | 461 |

|           |                                                             |     |
|-----------|-------------------------------------------------------------|-----|
| DmelGr68a | -----IFSAVTTYLVILIQFKQLEDKVEDISQA---                        | 389 |
| AmelGr7   | -----VIGTITTYLVVMIQVGDLSNSDKSILS----                        | 410 |
| AmelGr8   | -----MTCKITTFLLMLIQFLFVPPC-----                             | 395 |
| AmelGr9   | -----ITKGVLIYILILFQFLLNRYLCS-----                           | 391 |
| TcasGr57  | -----IFGSVTSYIIISIQFIE-----                                 | 387 |
| TcasGr41  | -----LFGSTAMNVIILLQFQKQKYN-----                             | 398 |
| AgamGr34  | -----MIGAITTYLVIIYIQFYILYADEVKKSSFVSRF                      | 427 |
| AgamGr35  | -----LVAGMVTYLIIFIQFNSMVPAGKDDTHHTRKQ                       | 444 |
| AgamGr39  | -----MISSFATYLNILVQFDIMQLRASGANNDTLL                        | 422 |
| AgamGr40  | -----VAATLVMHVVLVQFDLSIIANKV-----                           | 393 |
| AaegGr28d | -----MAGSFATYLVVLLQFDLANLNGI-----                           | 398 |
| AgamGr42  | -----IISALATYSVILIQFELGVPKFFISAILQQNG                       | 428 |
| AgamGr41  | -----ACSEAAATYLIIMIQQFETKI-----                             | 437 |
| AgamGr43  | -----VFSAAATSYLVLLQFDLSKDLEKSTITA----                       | 428 |
| DmelGr33a | -----TVSAAATSYLVLLQFDMTAILRNEGLMS----                       | 475 |
| AgamGr44  | -----IAAAVTNYLIIILIQFEMAIEQ-----                            | 397 |
| AgamGr13  | -----MLAAISNFVLLMQFHDYKSKKISYWHGNS                          | 411 |
| AgamGr45  | -----IIGATTTYLIILIQFDQSFNGD-----                            | 434 |
| AgamGr46  | -----IVGSLATYLLILIQFDIAQNGAKWKTELRAPL                       | 434 |
| DmelGr93a | -----ILSAIISYLFILIQFGITGGFEASEDIKNRFD                       | 419 |
| AmelGr6   | -----IAHVMSTYLIILLQFPSS-----                                | 439 |
| AmelGr10  | -----VAGLIRVDLPLLLSIFSALTTYLVILT----                        | 386 |
| TcasGr28  | -----                                                       |     |
| TcasGr40  | -----FFEFSVPLAIFAVV-----                                    | 373 |
| AgamGr3   | -----LVIVILTYVIFIEIAD-----                                  | 374 |
| AgamGr4   | -----TGITTYMIIFITFSKDIKLEDIDDE----                          | 422 |
| AgamGr6   | -----IFGSITSYLVIIYINFI PKTDTFNDYNKEHNLV                     | 421 |
| AgamGr7   | -----IAAAITTYMVIIFIQFMPKEDTPTDATTASNST                      | 430 |
| AgamGr47  | -----ILSALAMYLVFLIQFDVAPPVGLNSPNLTIPS                       | 412 |
| DmelGr8a  | -----MACSVGTYMIYSIQFI PKFSNTYM-----                         | 385 |
| AgamGr5   | -----IIFSVGAYISIFIQQAINQIDELKCNDEKQC                        | 441 |
| AgamGr8   | -----VLKIVTTYKILFDCYTKAKTSTKPPSAAQNPY                       | 382 |
| DmelGr9a  | -----MFFFFILEALVIFLQFVSLVRT-----                            | 341 |
| DmelGr59f | -----LLVASADFFIFLLQYDVTYEALSKSVQGNVTR                       | 404 |
| DmelGr77a | -----IVGAILEYLMILIQFDKVLNK-----                             | 449 |
| DmelGr85a | -----SASLILVHVLYMVQSDYISITN-----                            | 397 |
| TcasGr27  | -----IMQKAWSFFTALKNMHDIRNN-----                             | 346 |
| TcasGr48  | -----SLLNDILFPVAGFISDFDCDINSIQYFCLMARCL                     | 392 |
| AgamGr1   | -----CGVIATYLTVFLQFDNGDSL-----                              | 387 |
| DmelGr10a | -----IAVTAFSYFITLVQFDLYLRKKS-----                           | 408 |
| DmelGr59e | -----FIGVLMAIVIFLIQI GLGNKSLMGVALNRSNW                      | 396 |
| DmelGr10b | -----LISCSLSYGI III IQIGYIPG-----                           | 373 |
| DmelGr89a | -----LVSAMNFIVVILQTSFEHINHGEI-----                          | 362 |
| DmelGr57a | -----LFTSILVNYLLILIQFAMTQKMGEIEQQKIAL                       | 410 |
| DmelGr47b | -----GMANYV I I LVQLLFQQQIKDHQLTSGKD                        | 400 |
| DmelGr58a | -----YFFYVLVQVLVLVQFDLKNKVEKRN-----                         | 395 |
| DmelGr58b | -----YIGSILSNV I I LMQFDLRRQRQP INDRQYL I H                 | 400 |
| DmelGr98a | -----FFFGMISYIVICIQFSINFRAKKMSNEQMSQN                       | 383 |
| AaegGr93a | -----IIAASCSYLILLIQTA-----                                  | 395 |
| TcasGr19  | -----MIWNSTRRLFVVW-----                                     | 355 |
| DmelGr47a | -----LLAKSTLYTICCLQNDYNKLKA-----                            | 361 |
| DmelGr58c | -----MTRSIITNVLVLCQIAYKKYG-----                             | 412 |
| TcasGr38  | -----                                                       |     |
| TcasGr46  | RCKFSEFMTKLEFDVKLQSDRLMIDYKTQKTGSKIHLFVKCVFLMGYQIFDWVQKEQSL | 802 |
| TcasGr1   | -----                                                       |     |
| TcasGr123 | -----                                                       |     |
| TcasGr62  | -----                                                       |     |
| TcasGr25  | ALTS-----TEHSLSQSQHIQKIPKN-----                             | 314 |
| TcasGr59  | ALTS-----TEHSLSQSQHIQKIPKN-----                             | 489 |
| AgamGr2   | GSTT---AMAVVEGVVTTALT TYVSN-----                            | 445 |
| AaegGr66a | VTAA---TVAPLLNLSTTALSTYVANP-----                            | 507 |
| DmelGr66a | NDTAGLVGAATDMDNISSTLRDFVTTTTPAV-----                        | 530 |
| TcasGr11  | -----                                                       |     |
| TcasGr55  | C-----                                                      | 402 |
| TcasGr21  | -----                                                       |     |
| TcasGr56  | -----                                                       |     |
| AaegGr    | TPANTTSLP-----                                              | 449 |
| AaegGr28a | -----                                                       |     |

|            |                                                                 |     |
|------------|-----------------------------------------------------------------|-----|
| AgamGr33   | G--NETW-----                                                    | 443 |
| DmelGr28bB | TFNNMTNHTL-----                                                 | 443 |
| DmelGr28bC | TFNNMTNHTL-----                                                 | 470 |
| DmelGr28bD | TFNNMTNHTL-----                                                 | 440 |
| DmelGr28bA | TFNNMTNHTL-----                                                 | 452 |
| DmelGr28bE | TFNNMTNHTL-----                                                 | 447 |
| AgamGr25   | -----                                                           |     |
| AaegGr43a  | -----                                                           |     |
| DmelGr43a  | -----                                                           |     |
| AgamGr37b  | GST-----                                                        | 379 |
| AgamGr37d  | GST-----                                                        | 375 |
| AgamGr37a  | GST-----                                                        | 389 |
| AgamGr37c  | GST-----                                                        | 383 |
| AgamGr37e  | GST-----                                                        | 383 |
| AgamGr37f  | GST-----                                                        | 410 |
| AaegGr28c  | SGV-----                                                        | 573 |
| AaegGr28b  | TTTVKPKQ-----                                                   | 427 |
| AaegGr28e  | TTTAKPKQ-----                                                   | 427 |
| TcasGr14   | -----                                                           |     |
| TcasGr49   | -----                                                           |     |
| AmelGr4    | L-----                                                          | 415 |
| AmelGr5    | R-----                                                          | 414 |
| TcasGr16   | -----                                                           |     |
| TcasGr22   | -----                                                           |     |
| TcasGr17   | -----                                                           |     |
| TcasGr150  | -----                                                           |     |
| TcasGr32   | IPFYSTLRPINLLVQIILDVILLILNVHTILTITKRNQWCKLLENLKLDRENN-----      | 420 |
| TcasGr54   | -----                                                           |     |
| TcasGr37   | -----                                                           |     |
| TcasGr53   | -----                                                           |     |
| TcasGr5    | -----PVVLFIQVAADTVLFFILNISTIIITARKKQQWNSLIKILKTVSNRNDKGDIF----- | 395 |
| TcasGr12   | -----                                                           |     |
| TcasGr13   | -----                                                           |     |
| TcasGr104  | -----                                                           |     |
| TcasGr45   | -----                                                           |     |
| TcasGr98   | -----                                                           |     |
| TcasGr52   | -----                                                           |     |
| TcasGr105  | -----                                                           |     |
| TcasGr4    | -----                                                           |     |
| TcasGr44   | -----                                                           |     |
| AgamGr9a   | TSNVSTVQP-----                                                  | 397 |
| AgamGr9c   | TSNVSTVQP-----                                                  | 396 |
| AgamGr9b   | TSNVSTVQP-----                                                  | 447 |
| AgamGr9d   | TSNVSTVQP-----                                                  | 403 |
| AgamGr9e   | TSNVSTVQP-----                                                  | 399 |
| AgamGr9f   | TSNVSTVQP-----                                                  | 396 |
| AgamGr9g   | TSNVSTVQP-----                                                  | 399 |
| AgamGr9i   | TSNVSTVQP-----                                                  | 400 |
| AgamGr9h   | TSNVSTVQP-----                                                  | 405 |
| AgamGr9j   | TSNVSTVQP-----                                                  | 436 |
| AgamGr9l   | TSNVSTVQP-----                                                  | 426 |
| AgamGr9k   | TSNVSTVQP-----                                                  | 418 |
| AgamGr9m   | TSNVSTVQP-----                                                  | 421 |
| AgamGr9n   | TSNVSTVQP-----                                                  | 388 |
| AgamGr10   | TSNVSTVQP-----                                                  | 388 |
| AgamGr11   | TANGSDPNLKVH-----                                               | 397 |
| DmelGr23aA | -----                                                           |     |
| DmelGr23aB | -----                                                           |     |
| DmelGr39aA | -----                                                           |     |
| DmelGr39aB | -----                                                           |     |
| DmelGr39aC | -----                                                           |     |
| DmelGr39aD | -----                                                           |     |
| DmelGr98c  | DTS-----                                                        | 408 |
| DmelGr98d  | STELKAYTA-----                                                  | 412 |
| DmelGr98b  | -----                                                           |     |
| AgamGr51   | -----                                                           |     |
| AgamGr52   | -----                                                           |     |
| DmelGr94a  | -----                                                           |     |
| DmelGr97a  | -----                                                           |     |
| DmelGr93b  | -----                                                           |     |



|            |                                                             |     |
|------------|-------------------------------------------------------------|-----|
| DmelGr93c  | -----                                                       |     |
| DmelGr22d  | -----                                                       |     |
| DmelGr22e  | -----                                                       |     |
| DmelGr22a  | -----                                                       |     |
| DmelGr22b  | -----                                                       |     |
| DmelGr22c  | -----                                                       |     |
| DmelGr22f  | -----                                                       |     |
| DmelGr36a  | -----                                                       |     |
| DmelGr36c  | -----                                                       |     |
| DmelGr36b  | -----                                                       |     |
| DmelGr59d  | -----                                                       |     |
| DmelGr59a  | -----                                                       |     |
| DmelGr59b  | -----                                                       |     |
| AgamGr26   | SPSLPNDTNTPGNGTTI-----                                      | 445 |
| AgamGr27   | -----                                                       |     |
| AgamGr29   | -----                                                       |     |
| AgamGr31   | -----                                                       |     |
| AgamGr30   | IYNISVET-----                                               | 422 |
| AgamGr32a  | -----                                                       |     |
| TcasGr2    | TLITIGLYFQLCEFSRLNFSVEHLLMELSRAIDSVACSKTVSDGIRHYVNVTFPHLFNG | 512 |
| TcasGr9    | -----RDEKPYSRNSIC-----                                      | 408 |
| TcasGr7    | -----ETISEQIDSCPVYL-----                                    | 429 |
| TcasGr30   | -----ETISEQIDSCPVYL-----                                    | 394 |
| TcasGr29   | -----ETISEQIDSCPVYL-----                                    | 429 |
| AaegGr64f  | -----DTTRDCDF-----                                          | 380 |
| AaegGr64a3 | -----                                                       |     |
| AgamGr14   | -----                                                       |     |
| AgamGr18   | -----DTSTDCSYF-----                                         | 417 |
| AaegGr64d  | -----DPTTDCSFY-----                                         | 449 |
| AgamGr17   | -----EKSDFCDGVKRLY-----                                     | 410 |
| AaegGr64c  | -----DNTQFCDGGHRLY-----                                     | 434 |
| DmelGr64c  | -----VQKSFCEGGVSSKSIFS-----                                 | 419 |
| DmelGr64d  | -----VQKSICSRGPGSSMSIFFS-----                               | 429 |
| AgamGr20   | -----SSKGVGEDLPCGYID-----                                   | 439 |
| AaegGr61a  | -----DEPDDNNDVSCEPLHLD-----                                 | 441 |
| AgamGr21   | -----ESESKGNIPLCTKFRRFHVSV-----                             | 472 |
| AaegGr64a  | -----ESEKGYIRPCS-----                                       | 345 |
| DmelGr64a  | -----PNRRKGLQPLCA-----                                      | 456 |
| DmelGr61a  | -----KSHKG---LRCA-----                                      | 436 |
| AgamGr15   | -----ASDVLCKLKRMDTL-----                                    | 448 |
| AaegGr1    | -----TADYDLCTFRRT-----                                      | 449 |
| DmelGr5a   | -----TWDCSPFNLD-----                                        | 444 |
| DmelGr64f  | -----LWDCDQSYYS-----                                        | 469 |
| DmelGr64e  | -----VPGCFEN-----                                           | 460 |
| AmelGr1    | -----TDASNATIVCEVK-----                                     | 395 |
| AmelGr2    | -----                                                       |     |
| AgamGr16   | -----KNGDDNPCTWVAYKTVCQRVYGVSVFSGPDRT-----                  | 435 |
| AaegGr64e  | -----KNGDQNPCT-----                                         | 434 |
| TCasGr6    | -----G-----                                                 | 387 |
| TcasGr26   | -----G-----                                                 | 387 |
| TcasGr33   | -----G-----                                                 | 387 |
| AgamGr23   | -----IPVEI IENVKLLQKQ-----                                  | 485 |
| AaegGr21a  | -----MPIELME- IKHSHKG-----                                  | 476 |
| TcasGr10   | -----AQLAARRAIANVSVSSGNTTMS-----                            | 437 |
| TcasGr39   | -----AQLAARRAIAN-----                                       | 426 |
| AgamGr22   | -----AKNAFISALKANLSRIRSLDADKVNT-----                        | 461 |
| AaegGr21b  | -----ARKALIPALRANLTKLKEN-----                               | 460 |
| DmelGr21a  | -----IGQQQA-----                                            | 447 |
| AgamGr24   | -----PSAMLHMSNS-SHS-----                                    | 378 |
| AaegGr63a  | -----SSMLVMHNMGTGSYRE-----                                  | 445 |
| DmelGr63a  | EGANNITVDFV-----MDSLNDMSLMGASTLSTTTVGTTLPPPIMKLGKRGK-----   | 512 |
| TcasGr3    | -----ASPTNSTTITTTQTPN-----                                  | 436 |
| DmelOr83b  | -----                                                       |     |
| AgamOr7    | -----                                                       |     |
| HvirOr2    | -----                                                       |     |
| TcasOr16   | -----                                                       |     |
| TcasOr22   | -----                                                       |     |
| AmelOr2    | -----                                                       |     |
| TcasGr31   | -----                                                       |     |
| TcasGr35   | -----                                                       |     |

|           |                                           |     |
|-----------|-------------------------------------------|-----|
| DmelGr59c | -----                                     |     |
| DmelGr92a | -----                                     |     |
| DmelGr28a | HSIHLGD-----                              | 450 |
| DmelGr64b | -----                                     |     |
| TcasGr71  | -----                                     |     |
| AgamGr19  | FLFQPKMQITN-----                          | 414 |
| AaegGr64b | AFSQD-----                                | 355 |
| DmelGr93d | -----                                     |     |
| TcasGr34  | -----                                     |     |
| TcasGr43  | -----                                     |     |
| TcasGr47  | -----                                     |     |
| AmelGr3   | QILKNASPLQNFTGLKTIV-----                  | 475 |
| AgamGr32b | -----                                     |     |
| AgamGr50  | -----                                     |     |
| TcasGr20  | -----                                     |     |
| TcasGr79  | -----                                     |     |
| TcasGr15  | SFVIQFSHIPVDNIEFAGALVTYELTLFQYHAFYLT----- | 455 |
| TcasGr60  | -----                                     |     |
| AgamGr38  | -----                                     |     |
| TcasGr51  | -----                                     |     |
| DmelGr39b | -----                                     |     |
| AgamGr28  | LYTPTNS-----                              | 400 |
| TcasGr61  | -----                                     |     |
| TcasGr50  | -----                                     |     |
| AgamGr12  | ISF-----                                  | 393 |
| AgamGr36  | -----                                     |     |
| AgamGr48  | -----                                     |     |
| AgamGr49a | -----                                     |     |
| AgamGr49b | -----                                     |     |
| DmelGr2a  | -----                                     |     |
| DmelGr32a | -----                                     |     |
| DmelGr68a | -----                                     |     |
| AmelGr7   | -----                                     |     |
| AmelGr8   | -----                                     |     |
| AmelGr9   | -----                                     |     |
| TcasGr57  | -----                                     |     |
| TcasGr41  | -----                                     |     |
| AgamGr34  | QI-----                                   | 429 |
| AgamGr35  | HVTEERF-----                              | 451 |
| AgamGr39  | SFERS-----                                | 427 |
| AgamGr40  | -----                                     |     |
| AaegGr28d | -----                                     |     |
| AgamGr42  | DMTTTNSQP-----                            | 437 |
| AgamGr41  | -----                                     |     |
| AgamGr43  | -----                                     |     |
| DmelGr33a | -----                                     |     |
| AgamGr44  | -----                                     |     |
| AgamGr13  | SKPLTVRS-----                             | 419 |
| AgamGr45  | -----                                     |     |
| AgamGr46  | V-----                                    | 435 |
| Dmelr93a  | -----                                     |     |
| AmelGr6   | -----                                     |     |
| AmelGr10  | -----                                     |     |
| TcasGr28  | -----                                     |     |
| TcasGr40  | -----                                     |     |
| AgamGr3   | -----                                     |     |
| AgamGr4   | -----                                     |     |
| AgamGr6   | TT-----                                   | 423 |
| AgamGr7   | LANSTATATPE-----                          | 441 |
| AgamGr47  | IELIDFEV-----                             | 420 |
| DmelGr8a  | -----                                     |     |
| AgamGr5   | -----                                     |     |
| AgamGr8   | RRNHRVKRTLCEVEAEAKSFLTAKKII-----          | 409 |
| DmelGr9a  | -----                                     |     |
| DmelGr59f | YK-----                                   | 406 |
| DmelGr77a | -----                                     |     |
| DmelGr85a | -----                                     |     |
| TcasGr27  | -----                                     |     |
| TcasGr48  | NTLIFYHISTYEYSI-----                      | 408 |
| AgamGr1   | -----                                     |     |

|            |                                                               |     |
|------------|---------------------------------------------------------------|-----|
| DmelGr10a  | -----                                                         |     |
| DmelGr59e  | VYV-----                                                      | 399 |
| DmelGr10b  | -----                                                         |     |
| DmelGr89a  | -----                                                         |     |
| DmelGr57a  | QEWIGF-----                                                   | 416 |
| DmelGr47b  | VDIVGPMGPITHMD-----                                           | 414 |
| DmelGr58a  | -----                                                         |     |
| DmelGr58b  | LMKNKTKV-----                                                 | 408 |
| DmelGr98a  | ITSTSAPI-----                                                 | 391 |
| AaegGr93a  | -----                                                         |     |
| TcasGr19   | -----                                                         |     |
| DmelGr47a  | -----                                                         |     |
| DmelGr58c  | -----                                                         |     |
|            |                                                               |     |
| TcasGr38   | -----                                                         |     |
| TcasGr46   | AHSVGVFLTIFNAAHCYLATELVLMMLKNRYIILNGRLIKMETKAQSVALGKICTLHHHLS | 862 |
| TcasGr1    | -----                                                         |     |
| TcasGr123  | -----                                                         |     |
| TcasGr62   | -----                                                         |     |
| TcasGr25   | -----                                                         |     |
| TcasGr59   | -----                                                         |     |
| AgamGr2    | -----                                                         |     |
| AaegGr66a  | -----                                                         |     |
| DmelGr66a  | -----                                                         |     |
| TcasGr11   | -----                                                         |     |
| TcasGr55   | -----                                                         |     |
| TcasGr21   | -----                                                         |     |
| TcasGr56   | -----                                                         |     |
| AaegGr     | -----                                                         |     |
| AaegGr28a  | -----                                                         |     |
| AgamGr33   | -----                                                         |     |
| DmelGr28bB | -----                                                         |     |
| DmelGr28bC | -----                                                         |     |
| DmelGr28bD | -----                                                         |     |
| DmelGr28bA | -----                                                         |     |
| DmelGr28bE | -----                                                         |     |
| AgamGr25   | -----                                                         |     |
| AaegGr43a  | -----                                                         |     |
| DmelGr43a  | -----                                                         |     |
| AgamGr37b  | -----                                                         |     |
| AgamGr37d  | -----                                                         |     |
| AgamGr37a  | -----                                                         |     |
| AgamGr37c  | -----                                                         |     |
| AgamGr37e  | -----                                                         |     |
| AgamGr37f  | -----                                                         |     |
| AaegGr28c  | -----                                                         |     |
| AaegGr28b  | -----                                                         |     |
| AaegGr28e  | -----                                                         |     |
| TcasGr14   | -----                                                         |     |
| TcasGr49   | -----                                                         |     |
| AmelGr4    | -----                                                         |     |
| AmelGr5    | -----                                                         |     |
| TcasGr16   | -----                                                         |     |
| TcasGr22   | -----                                                         |     |
| TcasGr17   | -----                                                         |     |
| TcasGr150  | -----                                                         |     |
| TcasGr32   | --SSFVVANVLFQLIHVYYTVVFTLLLGVDVFVKEYAFEYIQLYSQFILYFLLFATLKILL | 478 |
| TcasGr54   | -----                                                         |     |
| TcasGr37   | -----                                                         |     |
| TcasGr53   | -----                                                         |     |
| TcasGr5    | WFSFPLVANLAFVTIVTYETFVWVWQIMGAEFFKLYAVEYFQMYAQFIVG-----       | 444 |
| TcasGr12   | -----                                                         |     |
| TcasGr13   | -----                                                         |     |
| TcasGr104  | -----                                                         |     |
| TcasGr45   | -----                                                         |     |
| TcasGr98   | -----                                                         |     |
| TcasGr52   | -----                                                         |     |
| TcasGr105  | -----                                                         |     |
| TcasGr4    | -----                                                         |     |

|            |                                                                 |
|------------|-----------------------------------------------------------------|
| TcasGr44   | -----                                                           |
| AgamGr9a   | -----                                                           |
| AgamGr9c   | -----                                                           |
| AgamGr9b   | -----                                                           |
| AgamGr9d   | -----                                                           |
| AgamGr9e   | -----                                                           |
| AgamGr9f   | -----                                                           |
| AgamGr9g   | -----                                                           |
| AgamGr9i   | -----                                                           |
| AgamGr9h   | -----                                                           |
| AgamGr9j   | -----                                                           |
| AgamGr9l   | -----                                                           |
| AgamGr9k   | -----                                                           |
| AgamGr9m   | -----                                                           |
| AgamGr9n   | -----                                                           |
| AgamGr10   | -----                                                           |
| AgamGr11   | -----                                                           |
| DmelGr23aA | -----                                                           |
| DmelGr23aB | -----                                                           |
| DmelGr39aA | -----                                                           |
| DmelGr39aB | -----                                                           |
| DmelGr39aC | -----                                                           |
| DmelGr39aD | -----                                                           |
| DmelGr98c  | -----                                                           |
| DmelGr98d  | -----                                                           |
| DmelGr98b  | -----                                                           |
| AgamGr51   | -----                                                           |
| AgamGr52   | -----                                                           |
| DmelGr94a  | -----                                                           |
| DmelGr97a  | -----                                                           |
| DmelGr93b  | -----                                                           |
| DmelGr93c  | -----                                                           |
| DmelGr22d  | -----                                                           |
| DmelGr22e  | -----                                                           |
| DmelGr22a  | -----                                                           |
| DmelGr22b  | -----                                                           |
| DmelGr22c  | -----                                                           |
| DmelGr22f  | -----                                                           |
| DmelGr36a  | -----                                                           |
| DmelGr36c  | -----                                                           |
| DmelGr36b  | -----                                                           |
| DmelGr59d  | -----                                                           |
| DmelGr59a  | -----                                                           |
| DmelGr59b  | -----                                                           |
| AgamGr26   | -----                                                           |
| AgamGr27   | -----                                                           |
| AgamGr29   | -----                                                           |
| AgamGr31   | -----                                                           |
| AgamGr30   | -----                                                           |
| AgamGr32a  | -----                                                           |
| TcasGr2    | LV DYSLWKALIFQISNLQTTFGGTFI ILLSMAFATRMKQSR TKIEALVKSHIAGAI 572 |
| TcasGr9    | -----                                                           |
| TcasGr7    | -----                                                           |
| TcasGr30   | -----                                                           |
| TcasGr29   | -----                                                           |
| AaegGr64f  | -----                                                           |
| AaegGr64a3 | -----                                                           |
| AgamGr14   | -----                                                           |
| AgamGr18   | -----                                                           |
| AaegGr64d  | -----                                                           |
| AgamGr17   | -----                                                           |
| AaegGr64c  | -----                                                           |
| DmelGr64c  | -----                                                           |
| DmelGr64d  | -----                                                           |
| AgamGr20   | -----                                                           |
| AaegGr61a  | -----                                                           |
| AgamGr21   | -----                                                           |
| AaegGr64a  | -----                                                           |
| DmelGr64a  | -----                                                           |
| DmelGr61a  | -----                                                           |

AgamGr15 -----  
AaegGr1 -----  
DmelGr5a -----  
DmelGr64f -----  
DmelGr64e -----  
AmelGr1 -----  
AmelGr2 -----  
AgamGr16 -----  
AaegGr64e -----  
TCasGr6 -----  
TcasGr26 -----  
TcasGr33 -----  
AgamGr23 -----  
AaegGr21a -----  
TcasGr10 -----  
TcasGr39 -----  
AgamGr22 -----  
AaegGr21b -----  
DmelGr21a -----  
AgamGr24 -----  
AaegGr63a -----  
DmelGr63a -----  
TcasGr3 -----  
DmelOr83b -----  
AgamOr7 -----  
HvirOr2 -----  
TcasOr16 -----  
TcasOr22 -----  
AmelOr2 -----  
TcasGr31 -----  
TcasGr35 -----  
DmelGr59c -----  
DmelGr92a -----  
DmelGr28a -----  
DmelGr64b -----  
TcasGr71 -----  
AgamGr19 -----  
AaegGr64b -----  
DmelGr93d -----  
TcasGr34 -----  
TcasGr43 -----  
TcasGr47 -----  
AmelGr3 -----  
AgamGr32b -----  
AgamGr50 -----  
TcasGr20 -----  
TcasGr79 -----  
TcasGr15 -----  
TcasGr60 -----  
AgamGr38 -----  
TcasGr51 -----  
DmelGr39b -----  
AgamGr28 -----  
TcasGr61 -----  
TcasGr50 -----  
AgamGr12 -----  
AgamGr36 -----  
AgamGr48 -----  
AgamGr49a -----  
AgamGr49b -----  
DmelGr2a -----  
DmelGr32a -----  
DmelGr68a -----  
AmelGr7 -----  
AmelGr8 -----  
AmelGr9 -----  
TcasGr57 -----  
TcasGr41 -----  
AgamGr34 -----  
AgamGr35 -----

AgamGr39 -----  
 AgamGr40 -----  
 AaegGr28d -----  
 AgamGr42 -----  
 AgamGr41 -----  
 AgamGr43 -----  
 DmelGr33a -----  
 AgamGr44 -----  
 AgamGr13 -----  
 AgamGr45 -----  
 AgamGr46 -----  
 Dmelr93a -----  
 AmelGr6 -----  
 AmelGr10 -----  
 TcasGr28 -----  
 TcasGr40 -----  
 AgamGr3 -----  
 AgamGr4 -----  
 AgamGr6 -----  
 AgamGr7 -----  
 AgamGr47 -----  
 DmelGr8a -----  
 AgamGr5 -----  
 AgamGr8 -----  
 DmelGr9a -----  
 DmelGr59f -----  
 DmelGr77a -----  
 DmelGr85a -----  
 TcasGr27 -----  
 TcasGr48 -----  
 AgamGr1 -----  
 DmelGr10a -----  
 DmelGr59e -----  
 DmelGr10b -----  
 DmelGr89a -----  
 DmelGr57a -----  
 DmelGr47b -----  
 DmelGr58a -----  
 DmelGr58b -----  
 DmelGr98a -----  
 AaegGr93a -----  
 TcasGr19 -----  
 DmelGr47a -----  
 DmelGr58c -----

TcasGr38 -----  
 TcasGr46 KLIRLFNEIFGHGLLLMFGISFLLVTQTIFALCVVLQLQENDWLQLGYLIFVSTLYTANV 922  
 TcasGr1 -----  
 TcasGr123 -----  
 TcasGr62 -----  
 TcasGr25 -----  
 TcasGr59 -----  
 AgamGr2 -----  
 AaegGr66a -----  
 DmelGr66a -----  
 TcasGr11 -----  
 TcasGr55 -----  
 TcasGr21 -----  
 TcasGr56 -----  
 AaegGr -----  
 AaegGr28a -----  
 AgamGr33 -----  
 DmelGr28bB -----  
 DmelGr28bC -----  
 DmelGr28bD -----  
 DmelGr28bA -----  
 DmelGr28bE -----  
 AgamGr25 -----  
 AaegGr43a -----

|            |                                                              |     |
|------------|--------------------------------------------------------------|-----|
| DmelGr43a  | -----                                                        |     |
| AgamGr37b  | -----                                                        |     |
| AgamGr37d  | -----                                                        |     |
| AgamGr37a  | -----                                                        |     |
| AgamGr37c  | -----                                                        |     |
| AgamGr37e  | -----                                                        |     |
| AgamGr37f  | -----                                                        |     |
| AaegGr28c  | -----                                                        |     |
| AaegGr28b  | -----                                                        |     |
| AaegGr28e  | -----                                                        |     |
| TcasGr14   | -----                                                        |     |
| TcasGr49   | -----                                                        |     |
| AmelGr4    | -----                                                        |     |
| AmelGr5    | -----                                                        |     |
| TcasGr16   | -----                                                        |     |
| TcasGr22   | -----                                                        |     |
| TcasGr17   | -----                                                        |     |
| TcasGr150  | -----                                                        |     |
| TcasGr32   | GKYTQLKACLMEEKRPMSLSQVIKAQIYSLRETVDVFNDIFGWPFLLLITFTSLQIMVYL | 538 |
| TcasGr54   | -----                                                        |     |
| TcasGr37   | -----                                                        |     |
| TcasGr53   | -----                                                        |     |
| TcasGr5    | -----                                                        |     |
| TcasGr12   | -----                                                        |     |
| TcasGr13   | -----                                                        |     |
| TcasGr104  | -----                                                        |     |
| TcasGr45   | -----                                                        |     |
| TcasGr98   | -----                                                        |     |
| TcasGr52   | -----                                                        |     |
| TcasGr105  | -----                                                        |     |
| TcasGr4    | -----                                                        |     |
| TcasGr44   | -----                                                        |     |
| AgamGr9a   | -----                                                        |     |
| AgamGr9c   | -----                                                        |     |
| AgamGr9b   | -----                                                        |     |
| AgamGr9d   | -----                                                        |     |
| AgamGr9e   | -----                                                        |     |
| AgamGr9f   | -----                                                        |     |
| AgamGr9g   | -----                                                        |     |
| AgamGr9i   | -----                                                        |     |
| AgamGr9h   | -----                                                        |     |
| AgamGr9j   | -----                                                        |     |
| AgamGr9l   | -----                                                        |     |
| AgamGr9k   | -----                                                        |     |
| AgamGr9m   | -----                                                        |     |
| AgamGr9n   | -----                                                        |     |
| AgamGr10   | -----                                                        |     |
| AgamGr11   | -----                                                        |     |
| DmelGr23aA | -----                                                        |     |
| DmelGr23aB | -----                                                        |     |
| DmelGr39aA | -----                                                        |     |
| DmelGr39aB | -----                                                        |     |
| DmelGr39aC | -----                                                        |     |
| DmelGr39aD | -----                                                        |     |
| DmelGr98c  | -----                                                        |     |
| DmelGr98d  | -----                                                        |     |
| DmelGr98b  | -----                                                        |     |
| AgamGr51   | -----                                                        |     |
| AgamGr52   | -----                                                        |     |
| DmelGr94a  | -----                                                        |     |
| DmelGr97a  | -----                                                        |     |
| DmelGr93b  | -----                                                        |     |
| DmelGr93c  | -----                                                        |     |
| DmelGr22d  | -----                                                        |     |
| DmelGr22e  | -----                                                        |     |
| DmelGr22a  | -----                                                        |     |
| DmelGr22b  | -----                                                        |     |
| DmelGr22c  | -----                                                        |     |
| DmelGr22f  | -----                                                        |     |
| DmelGr36a  | -----                                                        |     |

|            |                     |     |
|------------|---------------------|-----|
| DmelGr36c  | -----               |     |
| DmelGr36b  | -----               |     |
| DmelGr59d  | -----               |     |
| DmelGr59a  | -----               |     |
| DmelGr59b  | -----               |     |
| AgamGr26   | -----               |     |
| AgamGr27   | -----               |     |
| AgamGr29   | -----               |     |
| AgamGr31   | -----               |     |
| AgamGr30   | -----               |     |
| AgamGr32a  | -----               |     |
| TcasGr2    | VTYELVVIQFNLRL----- | 586 |
| TcasGr9    | -----               |     |
| TcasGr7    | -----               |     |
| TcasGr30   | -----               |     |
| TcasGr29   | -----               |     |
| AaegGr64f  | -----               |     |
| AaegGr64a3 | -----               |     |
| AgamGr14   | -----               |     |
| AgamGr18   | -----               |     |
| AaegGr64d  | -----               |     |
| AgamGr17   | -----               |     |
| AaegGr64c  | -----               |     |
| DmelGr64c  | -----               |     |
| DmelGr64d  | -----               |     |
| AgamGr20   | -----               |     |
| AaegGr61a  | -----               |     |
| AgamGr21   | -----               |     |
| AaegGr64a  | -----               |     |
| DmelGr64a  | -----               |     |
| DmelGr61a  | -----               |     |
| AgamGr15   | -----               |     |
| AaegGr1    | -----               |     |
| DmelGr5a   | -----               |     |
| DmelGr64f  | -----               |     |
| DmelGr64e  | -----               |     |
| AmelGr1    | -----               |     |
| AmelGr2    | -----               |     |
| AgamGr16   | -----               |     |
| AaegGr64e  | -----               |     |
| TCasGr6    | -----               |     |
| TcasGr26   | -----               |     |
| TcasGr33   | -----               |     |
| AgamGr23   | -----               |     |
| AaegGr21a  | -----               |     |
| TcasGr10   | -----               |     |
| TcasGr39   | -----               |     |
| AgamGr22   | -----               |     |
| AaegGr21b  | -----               |     |
| DmelGr21a  | -----               |     |
| AgamGr24   | -----               |     |
| AaegGr63a  | -----               |     |
| DmelGr63a  | -----               |     |
| TcasGr3    | -----               |     |
| DmelOr83b  | -----               |     |
| AgamOr7    | -----               |     |
| HvirOr2    | -----               |     |
| TcasOr16   | -----               |     |
| TcasOr22   | -----               |     |
| AmelOr2    | -----               |     |
| TcasGr31   | -----               |     |
| TcasGr35   | -----               |     |
| DmelGr59c  | -----               |     |
| DmelGr92a  | -----               |     |
| DmelGr28a  | -----               |     |
| DmelGr64b  | -----               |     |
| TcasGr71   | -----               |     |
| AgamGr19   | -----               |     |
| AaegGr64b  | -----               |     |
| DmelGr93d  | -----               |     |



TcasGr34 -----  
TcasGr43 -----  
TcasGr47 -----  
AmelGr3 -----  
AgamGr32b -----  
AgamGr50 -----  
TcasGr20 -----  
TcasGr79 -----  
TcasGr15 -----  
TcasGr60 -----  
AgamGr38 -----  
TcasGr51 -----  
DmelGr39b -----  
AgamGr28 -----  
TcasGr61 -----  
TcasGr50 -----  
AgamGr12 -----  
AgamGr36 -----  
AgamGr48 -----  
AgamGr49a -----  
AgamGr49b -----  
DmelGr2a -----  
DmelGr32a -----  
DmelGr68a -----  
AmelGr7 -----  
AmelGr8 -----  
AmelGr9 -----  
TcasGr57 -----  
TcasGr41 -----  
AgamGr34 -----  
AgamGr35 -----  
AgamGr39 -----  
AgamGr40 -----  
AaegGr28d -----  
AgamGr42 -----  
AgamGr41 -----  
AgamGr43 -----  
DmelGr33a -----  
AgamGr44 -----  
AgamGr13 -----  
AgamGr45 -----  
AgamGr46 -----  
Dmelr93a -----  
AmelGr6 -----  
AmelGr10 -----  
TcasGr28 -----  
TcasGr40 -----  
AgamGr3 -----  
AgamGr4 -----  
AgamGr6 -----  
AgamGr7 -----  
AgamGr47 -----  
DmelGr8a -----  
AgamGr5 -----  
AgamGr8 -----  
DmelGr9a -----  
DmelGr59f -----  
DmelGr77a -----  
DmelGr85a -----  
TcasGr27 -----  
TcasGr48 -----  
AgamGr1 -----  
DmelGr10a -----  
DmelGr59e -----  
DmelGr10b -----  
DmelGr89a -----  
DmelGr57a -----  
DmelGr47b -----  
DmelGr58a -----  
DmelGr58b -----

|            |                                                               |        |
|------------|---------------------------------------------------------------|--------|
| DmelGr98a  | -----                                                         |        |
| AaegGr93a  | -----                                                         |        |
| TcasGr19   | -----                                                         |        |
| DmelGr47a  | -----                                                         |        |
| DmelGr58c  | -----                                                         |        |
|            |                                                               |        |
| TcasGr38   | -----                                                         |        |
| TcasGr46   | VCICHVCYSTIQEVSKSGELIHKIATNDHEIIDKIDEMFSLQILNERAGFTAAGFFPIDYT | 982    |
| TcasGr1    | -----                                                         |        |
| TcasGr123  | -----                                                         |        |
| TcasGr62   | -----                                                         |        |
| TcasGr25   | -----                                                         |        |
| TcasGr59   | -----                                                         |        |
| AgamGr2    | -----                                                         |        |
| AaegGr66a  | -----                                                         |        |
| DmelGr66a  | -----                                                         |        |
| TcasGr11   | -----                                                         |        |
| TcasGr55   | -----                                                         |        |
| TcasGr21   | -----                                                         |        |
| TcasGr56   | -----                                                         |        |
| AaegGr     | -----                                                         |        |
| AaegGr28a  | -----                                                         |        |
| AgamGr33   | -----                                                         |        |
| DmelGr28bB | -----                                                         |        |
| DmelGr28bC | -----                                                         |        |
| DmelGr28bD | -----                                                         |        |
| DmelGr28bA | -----                                                         |        |
| DmelGr28bE | -----                                                         |        |
| AgamGr25   | -----                                                         |        |
| AaegGr43a  | -----                                                         |        |
| DmelGr43a  | -----                                                         |        |
| AgamGr37b  | -----                                                         |        |
| AgamGr37d  | -----                                                         |        |
| AgamGr37a  | -----                                                         |        |
| AgamGr37c  | -----                                                         |        |
| AgamGr37e  | -----                                                         |        |
| AgamGr37f  | -----                                                         |        |
| AaegGr28c  | -----                                                         |        |
| AaegGr28b  | -----                                                         |        |
| AaegGr28e  | -----                                                         |        |
| TcasGr14   | -----                                                         |        |
| TcasGr49   | -----                                                         |        |
| AmelGr4    | -----                                                         |        |
| AmelGr5    | -----                                                         |        |
| TcasGr16   | -----                                                         |        |
| TcasGr22   | -----                                                         |        |
| TcasGr17   | -----                                                         |        |
| TcasGr150  | -----                                                         |        |
| TcasGr32   | QHIFVKSRPSPATIIISNVTVISWQAVCTFYNILLCDSVAHTAGELLGAVYSLDLELKHIE | 598    |
| TcasGr54   | -----                                                         |        |
| TcasGr37   | -----                                                         |        |
| TcasGr53   | -----                                                         |        |
| TcasGr5    | -----TFNSVFICDLIEQKVKNIQMLVYQN-----                           | EA 471 |
| TcasGr12   | -----                                                         |        |
| TcasGr13   | -----                                                         |        |
| TcasGr104  | -----                                                         |        |
| TcasGr45   | -----                                                         |        |
| TcasGr98   | -----                                                         |        |
| TcasGr52   | -----                                                         |        |
| TcasGr105  | -----                                                         |        |
| TcasGr4    | -----                                                         |        |
| TcasGr44   | -----                                                         |        |
| AgamGr9a   | -----                                                         |        |
| AgamGr9c   | -----                                                         |        |
| AgamGr9b   | -----                                                         |        |
| AgamGr9d   | -----                                                         |        |
| AgamGr9e   | -----                                                         |        |
| AgamGr9f   | -----                                                         |        |
| AgamGr9g   | -----                                                         |        |

AgamGr9i -----  
AgamGr9h -----  
AgamGr9j -----  
AgamGr9l -----  
AgamGr9k -----  
AgamGr9m -----  
AgamGr9n -----  
AgamGr10 -----  
AgamGr11 -----  
DmelGr23aA -----  
DmelGr23aB -----  
DmelGr39aA -----  
DmelGr39aB -----  
DmelGr39aC -----  
DmelGr39aD -----  
DmelGr98c -----  
DmelGr98d -----  
DmelGr98b -----  
AgamGr51 -----  
AgamGr52 -----  
DmelGr94a -----  
DmelGr97a -----  
DmelGr93b -----  
DmelGr93c -----  
DmelGr22d -----  
DmelGr22e -----  
DmelGr22a -----  
DmelGr22b -----  
DmelGr22c -----  
DmelGr22f -----  
DmelGr36a -----  
DmelGr36c -----  
DmelGr36b -----  
DmelGr59d -----  
DmelGr59a -----  
DmelGr59b -----  
AgamGr26 -----  
AgamGr27 -----  
AgamGr29 -----  
AgamGr31 -----  
AgamGr30 -----  
AgamGr32a -----  
TcasGr2 -----  
TcasGr9 -----  
TcasGr7 -----  
TcasGr30 -----  
TcasGr29 -----  
AaegGr64f -----  
AaegGr64a3 -----  
AgamGr14 -----  
AgamGr18 -----  
AaegGr64d -----  
AgamGr17 -----  
AaegGr64c -----  
DmelGr64c -----  
DmelGr64d -----  
AgamGr20 -----  
AaegGr61a -----  
AgamGr21 -----  
AaegGr64a -----  
DmelGr64a -----  
DmelGr61a -----  
AgamGr15 -----  
AaegGr1 -----  
DmelGr5a -----  
DmelGr64f -----  
DmelGr64e -----  
AmelGr1 -----  
AmelGr2 -----  
AgamGr16 -----

AaegGr64e -----  
TCasGr6 -----  
TcasGr26 -----  
TcasGr33 -----  
AgamGr23 -----  
AaegGr21a -----  
TcasGr10 -----  
TcasGr39 -----  
AgamGr22 -----  
AaegGr21b -----  
DmelGr21a -----  
AgamGr24 -----  
AaegGr63a -----  
DmelGr63a -----  
TcasGr3 -----  
DmelOr83b -----  
AgamOr7 -----  
HvirOr2 -----  
TcasOr16 -----  
TcasOr22 -----  
AmelOr2 -----  
TcasGr31 -----  
TcasGr35 -----  
DmelGr59c -----  
DmelGr92a -----  
DmelGr28a -----  
DmelGr64b -----  
TcasGr71 -----  
AgamGr19 -----  
AaegGr64b -----  
DmelGr93d -----  
TcasGr34 -----  
TcasGr43 -----  
TcasGr47 -----  
AmelGr3 -----  
AgamGr32b -----  
AgamGr50 -----  
TcasGr20 -----  
TcasGr79 -----  
TcasGr15 -----  
TcasGr60 -----  
AgamGr38 -----  
TcasGr51 -----  
DmelGr39b -----  
AgamGr28 -----  
TcasGr61 -----  
TcasGr50 -----  
AgamGr12 -----  
AgamGr36 -----  
AgamGr48 -----  
AgamGr49a -----  
AgamGr49b -----  
DmelGr2a -----  
DmelGr32a -----  
DmelGr68a -----  
AmelGr7 -----  
AmelGr8 -----  
AmelGr9 -----  
TcasGr57 -----  
TcasGr41 -----  
AgamGr34 -----  
AgamGr35 -----  
AgamGr39 -----  
AgamGr40 -----  
AaegGr28d -----  
AgamGr42 -----  
AgamGr41 -----  
AgamGr43 -----  
DmelGr33a -----  
AgamGr44 -----

AgamGr13 -----  
 AgamGr45 -----  
 AgamGr46 -----  
 Dmelr93a -----  
 AmelGr6 -----  
 AmelGr10 -----  
 TcasGr28 -----  
 TcasGr40 -----  
 AgamGr3 -----  
 AgamGr4 -----  
 AgamGr6 -----  
 AgamGr7 -----  
 AgamGr47 -----  
 DmelGr8a -----  
 AgamGr5 -----  
 AgamGr8 -----  
 DmelGr9a -----  
 DmelGr59f -----  
 DmelGr77a -----  
 DmelGr85a -----  
 TcasGr27 -----  
 TcasGr48 -----  
 AgamGr1 -----  
 DmelGr10a -----  
 DmelGr59e -----  
 DmelGr10b -----  
 DmelGr89a -----  
 DmelGr57a -----  
 DmelGr47b -----  
 DmelGr58a -----  
 DmelGr58b -----  
 DmelGr98a -----  
 AaegGr93a -----  
 TcasGr19 -----  
 DmelGr47a -----  
 DmelGr58c -----

TcasGr38 -----  
 TcasGr46 SAFSSEKIVWLHLVYISFLGIICAADVFIYICHVYATIQEVRAKIYFFYLVKFYKVKSKG 1042  
 TcasGr1 -----  
 TcasGr123 -----  
 TcasGr62 -----  
 TcasGr25 -----  
 TcasGr59 -----  
 AgamGr2 -----  
 AaegGr66a -----  
 DmelGr66a -----  
 TcasGr11 -----  
 TcasGr55 -----  
 TcasGr21 -----  
 TcasGr56 -----  
 AaegGr -----  
 AaegGr28a -----  
 AgamGr33 -----  
 DmelGr28bB -----  
 DmelGr28bC -----  
 DmelGr28bD -----  
 DmelGr28bA -----  
 DmelGr28bE -----  
 AgamGr25 -----  
 AaegGr43a -----  
 DmelGr43a -----  
 AgamGr37b -----  
 AgamGr37d -----  
 AgamGr37a -----  
 AgamGr37c -----  
 AgamGr37e -----  
 AgamGr37f -----  
 AaegGr28c -----

|            |                                                            |     |
|------------|------------------------------------------------------------|-----|
| AaegGr28b  | -----                                                      |     |
| AaegGr28e  | -----                                                      |     |
| TcasGr14   | -----                                                      |     |
| TcasGr49   | -----                                                      |     |
| AmelGr4    | -----                                                      |     |
| AmelGr5    | -----                                                      |     |
| TcasGr16   | -----                                                      |     |
| TcasGr22   | -----                                                      |     |
| TcasGr17   | -----                                                      |     |
| TcasGr150  | -----                                                      |     |
| TcasGr32   | NFNDFVTALKDNVPVFAAARFYAINRSTIFRMFNAIVTFLIVMVQFETNYSQP----- | 651 |
| TcasGr54   | -----                                                      |     |
| TcasGr37   | -----                                                      |     |
| TcasGr53   | -----                                                      |     |
| TcasGr5    | EEVKILLDVINHFPHTAARFFDLNRKTILGVLNALFTFLIVVQFENLTS-----     | 522 |
| TcasGr12   | -----                                                      |     |
| TcasGr13   | -----                                                      |     |
| TcasGr104  | -----                                                      |     |
| TcasGr45   | -----                                                      |     |
| TcasGr98   | -----                                                      |     |
| TcasGr52   | -----                                                      |     |
| TcasGr105  | -----                                                      |     |
| TcasGr4    | -----                                                      |     |
| TcasGr44   | -----                                                      |     |
| AgamGr9a   | -----                                                      |     |
| AgamGr9c   | -----                                                      |     |
| AgamGr9b   | -----                                                      |     |
| AgamGr9d   | -----                                                      |     |
| AgamGr9e   | -----                                                      |     |
| AgamGr9f   | -----                                                      |     |
| AgamGr9g   | -----                                                      |     |
| AgamGr9i   | -----                                                      |     |
| AgamGr9h   | -----                                                      |     |
| AgamGr9j   | -----                                                      |     |
| AgamGr9l   | -----                                                      |     |
| AgamGr9k   | -----                                                      |     |
| AgamGr9m   | -----                                                      |     |
| AgamGr9n   | -----                                                      |     |
| AgamGr10   | -----                                                      |     |
| AgamGr11   | -----                                                      |     |
| DmelGr23aA | -----                                                      |     |
| DmelGr23aB | -----                                                      |     |
| DmelGr39aA | -----                                                      |     |
| DmelGr39aB | -----                                                      |     |
| DmelGr39aC | -----                                                      |     |
| DmelGr39aD | -----                                                      |     |
| DmelGr98c  | -----                                                      |     |
| DmelGr98d  | -----                                                      |     |
| DmelGr98b  | -----                                                      |     |
| AgamGr51   | -----                                                      |     |
| AgamGr52   | -----                                                      |     |
| DmelGr94a  | -----                                                      |     |
| DmelGr97a  | -----                                                      |     |
| DmelGr93b  | -----                                                      |     |
| DmelGr93c  | -----                                                      |     |
| DmelGr22d  | -----                                                      |     |
| DmelGr22e  | -----                                                      |     |
| DmelGr22a  | -----                                                      |     |
| DmelGr22b  | -----                                                      |     |
| DmelGr22c  | -----                                                      |     |
| DmelGr22f  | -----                                                      |     |
| DmelGr36a  | -----                                                      |     |
| DmelGr36c  | -----                                                      |     |
| DmelGr36b  | -----                                                      |     |
| DmelGr59d  | -----                                                      |     |
| DmelGr59a  | -----                                                      |     |
| DmelGr59b  | -----                                                      |     |
| AgamGr26   | -----                                                      |     |
| AgamGr27   | -----                                                      |     |
| AgamGr29   | -----                                                      |     |

AgamGr31 -----  
AgamGr30 -----  
AgamGr32a -----  
TcasGr2 -----  
TcasGr9 -----  
TcasGr7 -----  
TcasGr30 -----  
TcasGr29 -----  
AaegGr64f -----  
AaegGr64a3 -----  
AgamGr14 -----  
AgamGr18 -----  
AaegGr64d -----  
AgamGr17 -----  
AaegGr64c -----  
DmelGr64c -----  
DmelGr64d -----  
AgamGr20 -----  
AaegGr61a -----  
AgamGr21 -----  
AaegGr64a -----  
DmelGr64a -----  
DmelGr61a -----  
AgamGr15 -----  
AaegGr1 -----  
DmelGr5a -----  
DmelGr64f -----  
DmelGr64e -----  
AmelGr1 -----  
AmelGr2 -----  
AgamGr16 -----  
AaegGr64e -----  
TCasGr6 -----  
TcasGr26 -----  
TcasGr33 -----  
AgamGr23 -----  
AaegGr21a -----  
TcasGr10 -----  
TcasGr39 -----  
AgamGr22 -----  
AaegGr21b -----  
DmelGr21a -----  
AgamGr24 -----  
AaegGr63a -----  
DmelGr63a -----  
TcasGr3 -----  
DmelOr83b -----  
AgamOr7 -----  
HvirOr2 -----  
TcasOr16 -----  
TcasOr22 -----  
AmelOr2 -----  
TcasGr31 -----  
TcasGr35 -----  
DmelGr59c -----  
DmelGr92a -----  
DmelGr28a -----  
DmelGr64b -----  
TcasGr71 -----  
AgamGr19 -----  
AaegGr64b -----  
DmelGr93d -----  
TcasGr34 -----  
TcasGr43 -----  
TcasGr47 -----  
AmelGr3 -----  
AgamGr32b -----  
AgamGr50 -----  
TcasGr20 -----  
TcasGr79 -----

TcasGr15 -----  
TcasGr60 -----  
AgamGr38 -----  
TcasGr51 -----  
DmelGr39b -----  
AgamGr28 -----  
TcasGr61 -----  
TcasGr50 -----  
AgamGr12 -----  
AgamGr36 -----  
AgamGr48 -----  
AgamGr49a -----  
AgamGr49b -----  
DmelGr2a -----  
DmelGr32a -----  
DmelGr68a -----  
AmelGr7 -----  
AmelGr8 -----  
AmelGr9 -----  
TcasGr57 -----  
TcasGr41 -----  
AgamGr34 -----  
AgamGr35 -----  
AgamGr39 -----  
AgamGr40 -----  
AaegGr28d -----  
AgamGr42 -----  
AgamGr41 -----  
AgamGr43 -----  
DmelGr33a -----  
AgamGr44 -----  
AgamGr13 -----  
AgamGr45 -----  
AgamGr46 -----  
Dmelr93a -----  
AmelGr6 -----  
AmelGr10 -----  
TcasGr28 -----  
TcasGr40 -----  
AgamGr3 -----  
AgamGr4 -----  
AgamGr6 -----  
AgamGr7 -----  
AgamGr47 -----  
DmelGr8a -----  
AgamGr5 -----  
AgamGr8 -----  
DmelGr9a -----  
DmelGr59f -----  
DmelGr77a -----  
DmelGr85a -----  
TcasGr27 -----  
TcasGr48 -----  
AgamGr1 -----  
DmelGr10a -----  
DmelGr59e -----  
DmelGr10b -----  
DmelGr89a -----  
DmelGr57a -----  
DmelGr47b -----  
DmelGr58a -----  
DmelGr58b -----  
DmelGr98a -----  
AaegGr93a -----  
TcasGr19 -----  
DmelGr47a -----  
DmelGr58c -----  
  
TcasGr38 -----



|            |                                                              |      |
|------------|--------------------------------------------------------------|------|
| TcasGr46   | ELIHKIETNEHEIIDKIEMFSLQILNERAEFNAAGFFPIDYTLVFSKFTSSIRMLLIQQQ | 1102 |
| TcasGr1    | -----                                                        |      |
| TcasGr123  | -----                                                        |      |
| TcasGr62   | -----                                                        |      |
| TcasGr25   | -----                                                        |      |
| TcasGr59   | -----                                                        |      |
| AgamGr2    | -----                                                        |      |
| AaegGr66a  | -----                                                        |      |
| DmelGr66a  | -----                                                        |      |
| TcasGr11   | -----                                                        |      |
| TcasGr55   | -----                                                        |      |
| TcasGr21   | -----                                                        |      |
| TcasGr56   | -----                                                        |      |
| AaegGr     | -----                                                        |      |
| AaegGr28a  | -----                                                        |      |
| AgamGr33   | -----                                                        |      |
| DmelGr28bB | -----                                                        |      |
| DmelGr28bC | -----                                                        |      |
| DmelGr28bD | -----                                                        |      |
| DmelGr28bA | -----                                                        |      |
| DmelGr28bE | -----                                                        |      |
| AgamGr25   | -----                                                        |      |
| AaegGr43a  | -----                                                        |      |
| DmelGr43a  | -----                                                        |      |
| AgamGr37b  | -----                                                        |      |
| AgamGr37d  | -----                                                        |      |
| AgamGr37a  | -----                                                        |      |
| AgamGr37c  | -----                                                        |      |
| AgamGr37e  | -----                                                        |      |
| AgamGr37f  | -----                                                        |      |
| AaegGr28c  | -----                                                        |      |
| AaegGr28b  | -----                                                        |      |
| AaegGr28e  | -----                                                        |      |
| TcasGr14   | -----                                                        |      |
| TcasGr49   | -----                                                        |      |
| AmelGr4    | -----                                                        |      |
| AmelGr5    | -----                                                        |      |
| TcasGr16   | -----                                                        |      |
| TcasGr22   | -----                                                        |      |
| TcasGr17   | -----                                                        |      |
| TcasGr150  | -----                                                        |      |
| TcasGr32   | -----                                                        |      |
| TcasGr54   | -----                                                        |      |
| TcasGr37   | -----                                                        |      |
| TcasGr53   | -----                                                        |      |
| TcasGr5    | -----                                                        |      |
| TcasGr12   | -----                                                        |      |
| TcasGr13   | -----                                                        |      |
| TcasGr104  | -----                                                        |      |
| TcasGr45   | -----                                                        |      |
| TcasGr98   | -----                                                        |      |
| TcasGr52   | -----                                                        |      |
| TcasGr105  | -----                                                        |      |
| TcasGr4    | -----                                                        |      |
| TcasGr44   | -----                                                        |      |
| AgamGr9a   | -----                                                        |      |
| AgamGr9c   | -----                                                        |      |
| AgamGr9b   | -----                                                        |      |
| AgamGr9d   | -----                                                        |      |
| AgamGr9e   | -----                                                        |      |
| AgamGr9f   | -----                                                        |      |
| AgamGr9g   | -----                                                        |      |
| AgamGr9i   | -----                                                        |      |
| AgamGr9h   | -----                                                        |      |
| AgamGr9j   | -----                                                        |      |
| AgamGr9l   | -----                                                        |      |
| AgamGr9k   | -----                                                        |      |
| AgamGr9m   | -----                                                        |      |
| AgamGr9n   | -----                                                        |      |
| AgamGr10   | -----                                                        |      |

AgamGr11 -----  
DmelGr23aA -----  
DmelGr23aB -----  
DmelGr39aA -----  
DmelGr39aB -----  
DmelGr39aC -----  
DmelGr39aD -----  
DmelGr98c -----  
DmelGr98d -----  
DmelGr98b -----  
AgamGr51 -----  
AgamGr52 -----  
DmelGr94a -----  
DmelGr97a -----  
DmelGr93b -----  
DmelGr93c -----  
DmelGr22d -----  
DmelGr22e -----  
DmelGr22a -----  
DmelGr22b -----  
DmelGr22c -----  
DmelGr22f -----  
DmelGr36a -----  
DmelGr36c -----  
DmelGr36b -----  
DmelGr59d -----  
DmelGr59a -----  
DmelGr59b -----  
AgamGr26 -----  
AgamGr27 -----  
AgamGr29 -----  
AgamGr31 -----  
AgamGr30 -----  
AgamGr32a -----  
TcasGr2 -----  
TcasGr9 -----  
TcasGr7 -----  
TcasGr30 -----  
TcasGr29 -----  
AaegGr64f -----  
AaegGr64a3 -----  
AgamGr14 -----  
AgamGr18 -----  
AaegGr64d -----  
AgamGr17 -----  
AaegGr64c -----  
DmelGr64c -----  
DmelGr64d -----  
AgamGr20 -----  
AaegGr61a -----  
AgamGr21 -----  
AaegGr64a -----  
DmelGr64a -----  
DmelGr61a -----  
AgamGr15 -----  
AaegGr1 -----  
DmelGr5a -----  
DmelGr64f -----  
DmelGr64e -----  
AmelGr1 -----  
AmelGr2 -----  
AgamGr16 -----  
AaegGr64e -----  
TCasGr6 -----  
TcasGr26 -----  
TcasGr33 -----  
AgamGr23 -----  
AaegGr21a -----  
TcasGr10 -----  
TcasGr39 -----

AgamGr22 -----  
AaegGr21b -----  
DmelGr21a -----  
AgamGr24 -----  
AaegGr63a -----  
DmelGr63a -----  
TcasGr3 -----  
DmelOr83b -----  
AgamOr7 -----  
HvirOr2 -----  
TcasOr16 -----  
TcasOr22 -----  
AmelOr2 -----  
TcasGr31 -----  
TcasGr35 -----  
DmelGr59c -----  
DmelGr92a -----  
DmelGr28a -----  
DmelGr64b -----  
TcasGr71 -----  
AgamGr19 -----  
AaegGr64b -----  
DmelGr93d -----  
TcasGr34 -----  
TcasGr43 -----  
TcasGr47 -----  
AmelGr3 -----  
AgamGr32b -----  
AgamGr50 -----  
TcasGr20 -----  
TcasGr79 -----  
TcasGr15 -----  
TcasGr60 -----  
AgamGr38 -----  
TcasGr51 -----  
DmelGr39b -----  
AgamGr28 -----  
TcasGr61 -----  
TcasGr50 -----  
AgamGr12 -----  
AgamGr36 -----  
AgamGr48 -----  
AgamGr49a -----  
AgamGr49b -----  
DmelGr2a -----  
DmelGr32a -----  
DmelGr68a -----  
AmelGr7 -----  
AmelGr8 -----  
AmelGr9 -----  
TcasGr57 -----  
TcasGr41 -----  
AgamGr34 -----  
AgamGr35 -----  
AgamGr39 -----  
AgamGr40 -----  
AaegGr28d -----  
AgamGr42 -----  
AgamGr41 -----  
AgamGr43 -----  
DmelGr33a -----  
AgamGr44 -----  
AgamGr13 -----  
AgamGr45 -----  
AgamGr46 -----  
Dmelr93a -----  
AmelGr6 -----  
AmelGr10 -----  
TcasGr28 -----  
TcasGr40 -----

AgamGr3 -----  
 AgamGr4 -----  
 AgamGr6 -----  
 AgamGr7 -----  
 AgamGr47 -----  
 DmelGr8a -----  
 AgamGr5 -----  
 AgamGr8 -----  
 DmelGr9a -----  
 DmelGr59f -----  
 DmelGr77a -----  
 DmelGr85a -----  
 TcasGr27 -----  
 TcasGr48 -----  
 AgamGr1 -----  
 DmelGr10a -----  
 DmelGr59e -----  
 DmelGr10b -----  
 DmelGr89a -----  
 DmelGr57a -----  
 DmelGr47b -----  
 DmelGr58a -----  
 DmelGr58b -----  
 DmelGr98a -----  
 AaegGr93a -----  
 TcasGr19 -----  
 DmelGr47a -----  
 DmelGr58c -----

TcasGr38 -----  
 TcasGr46 IFGLITFGCSNRCFFPSKIRICWNVLLNCVYLFLCGFCVYEFASDERIKLVKAIIMIL 1162  
 TcasGr1 -----  
 TcasGr123 -----  
 TcasGr62 -----  
 TcasGr25 -----  
 TcasGr59 -----  
 AgamGr2 -----  
 AaegGr66a -----  
 DmelGr66a -----  
 TcasGr11 -----  
 TcasGr55 -----  
 TcasGr21 -----  
 TcasGr56 -----  
 AaegGr -----  
 AaegGr28a -----  
 AgamGr33 -----  
 DmelGr28bB -----  
 DmelGr28bC -----  
 DmelGr28bD -----  
 DmelGr28bA -----  
 DmelGr28bE -----  
 AgamGr25 -----  
 AaegGr43a -----  
 DmelGr43a -----  
 AgamGr37b -----  
 AgamGr37d -----  
 AgamGr37a -----  
 AgamGr37c -----  
 AgamGr37e -----  
 AgamGr37f -----  
 AaegGr28c -----  
 AaegGr28b -----  
 AaegGr28e -----  
 TcasGr14 -----  
 TcasGr49 -----  
 AmelGr4 -----  
 AmelGr5 -----  
 TcasGr16 -----  
 TcasGr22 -----

TcasGr17 -----  
TcasGr150 -----  
TcasGr32 -----  
TcasGr54 -----  
TcasGr37 -----  
TcasGr53 -----  
TcasGr5 -----  
TcasGr12 -----  
TcasGr13 -----  
TcasGr104 -----  
TcasGr45 -----  
TcasGr98 -----  
TcasGr52 -----  
TcasGr105 -----  
TcasGr4 -----  
TcasGr44 -----  
AgamGr9a -----  
AgamGr9c -----  
AgamGr9b -----  
AgamGr9d -----  
AgamGr9e -----  
AgamGr9f -----  
AgamGr9g -----  
AgamGr9i -----  
AgamGr9h -----  
AgamGr9j -----  
AgamGr9l -----  
AgamGr9k -----  
AgamGr9m -----  
AgamGr9n -----  
AgamGr10 -----  
AgamGr11 -----  
DmelGr23aA -----  
DmelGr23aB -----  
DmelGr39aA -----  
DmelGr39aB -----  
DmelGr39aC -----  
DmelGr39aD -----  
DmelGr98c -----  
DmelGr98d -----  
DmelGr98b -----  
AgamGr51 -----  
AgamGr52 -----  
DmelGr94a -----  
DmelGr97a -----  
DmelGr93b -----  
DmelGr93c -----  
DmelGr22d -----  
DmelGr22e -----  
DmelGr22a -----  
DmelGr22b -----  
DmelGr22c -----  
DmelGr22f -----  
DmelGr36a -----  
DmelGr36c -----  
DmelGr36b -----  
DmelGr59d -----  
DmelGr59a -----  
DmelGr59b -----  
AgamGr26 -----  
AgamGr27 -----  
AgamGr29 -----  
AgamGr31 -----  
AgamGr30 -----  
AgamGr32a -----  
TcasGr2 -----  
TcasGr9 -----  
TcasGr7 -----  
TcasGr30 -----  
TcasGr29 -----

AaegGr64f -----  
AaegGr64a3 -----  
AgamGr14 -----  
AgamGr18 -----  
AaegGr64d -----  
AgamGr17 -----  
AaegGr64c -----  
DmelGr64c -----  
DmelGr64d -----  
AgamGr20 -----  
AaegGr61a -----  
AgamGr21 -----  
AaegGr64a -----  
DmelGr64a -----  
DmelGr61a -----  
AgamGr15 -----  
AaegGr1 -----  
DmelGr5a -----  
DmelGr64f -----  
DmelGr64e -----  
AmelGr1 -----  
AmelGr2 -----  
AgamGr16 -----  
AaegGr64e -----  
TCasGr6 -----  
TcasGr26 -----  
TcasGr33 -----  
AgamGr23 -----  
AaegGr21a -----  
TcasGr10 -----  
TcasGr39 -----  
AgamGr22 -----  
AaegGr21b -----  
DmelGr21a -----  
AgamGr24 -----  
AaegGr63a -----  
DmelGr63a -----  
TcasGr3 -----  
DmelOr83b -----  
AgamOr7 -----  
HvirOr2 -----  
TcasOr16 -----  
TcasOr22 -----  
AmelOr2 -----  
TcasGr31 -----  
TcasGr35 -----  
DmelGr59c -----  
DmelGr92a -----  
DmelGr28a -----  
DmelGr64b -----  
TcasGr71 -----  
AgamGr19 -----  
AaegGr64b -----  
DmelGr93d -----  
TcasGr34 -----  
TcasGr43 -----  
TcasGr47 -----  
AmelGr3 -----  
AgamGr32b -----  
AgamGr50 -----  
TcasGr20 -----  
TcasGr79 -----  
TcasGr15 -----  
TcasGr60 -----  
AgamGr38 -----  
TcasGr51 -----  
DmelGr39b -----  
AgamGr28 -----  
TcasGr61 -----  
TcasGr50 -----

|           |                                                                   |
|-----------|-------------------------------------------------------------------|
| AgamGr12  | -----                                                             |
| AgamGr36  | -----                                                             |
| AgamGr48  | -----                                                             |
| AgamGr49a | -----                                                             |
| AgamGr49b | -----                                                             |
| DmelGr2a  | -----                                                             |
| DmelGr32a | -----                                                             |
| DmelGr68a | -----                                                             |
| AmelGr7   | -----                                                             |
| AmelGr8   | -----                                                             |
| AmelGr9   | -----                                                             |
| TcasGr57  | -----                                                             |
| TcasGr41  | -----                                                             |
| AgamGr34  | -----                                                             |
| AgamGr35  | -----                                                             |
| AgamGr39  | -----                                                             |
| AgamGr40  | -----                                                             |
| AaegGr28d | -----                                                             |
| AgamGr42  | -----                                                             |
| AgamGr41  | -----                                                             |
| AgamGr43  | -----                                                             |
| DmelGr33a | -----                                                             |
| AgamGr44  | -----                                                             |
| AgamGr13  | -----                                                             |
| AgamGr45  | -----                                                             |
| AgamGr46  | -----                                                             |
| Dmelr93a  | -----                                                             |
| AmelGr6   | -----                                                             |
| AmelGr10  | -----                                                             |
| TcasGr28  | -----                                                             |
| TcasGr40  | -----                                                             |
| AgamGr3   | -----                                                             |
| AgamGr4   | -----                                                             |
| AgamGr6   | -----                                                             |
| AgamGr7   | -----                                                             |
| AgamGr47  | -----                                                             |
| DmelGr8a  | -----                                                             |
| AgamGr5   | -----                                                             |
| AgamGr8   | -----                                                             |
| DmelGr9a  | -----                                                             |
| DmelGr59f | -----                                                             |
| DmelGr77a | -----                                                             |
| DmelGr85a | -----                                                             |
| TcasGr27  | -----                                                             |
| TcasGr48  | -----                                                             |
| AgamGr1   | -----                                                             |
| DmelGr10a | -----                                                             |
| DmelGr59e | -----                                                             |
| DmelGr10b | -----                                                             |
| DmelGr89a | -----                                                             |
| DmelGr57a | -----                                                             |
| DmelGr47b | -----                                                             |
| DmelGr58a | -----                                                             |
| DmelGr58b | -----                                                             |
| DmelGr98a | -----                                                             |
| AaegGr93a | -----                                                             |
| TcasGr19  | -----                                                             |
| DmelGr47a | -----                                                             |
| DmelGr58c | -----                                                             |
|           |                                                                   |
| TcasGr38  | -----                                                             |
| TcasGr46  | SGCIIIFTEGIWICSLIHRKKIVKFLDGIMAFDIQLKQVVNYKKKKFQRMVVARVYYATI 1222 |
| TcasGr1   | -----                                                             |
| TcasGr123 | -----                                                             |
| TcasGr62  | -----                                                             |
| TcasGr25  | -----                                                             |
| TcasGr59  | -----                                                             |
| AgamGr2   | -----                                                             |
| AaegGr66a | -----                                                             |

DmelGr66a -----  
TcasGr11 -----  
TcasGr55 -----  
TcasGr21 -----  
TcasGr56 -----  
AaegGr -----  
AaegGr28a -----  
AgamGr33 -----  
DmelGr28bB -----  
DmelGr28bC -----  
DmelGr28bD -----  
DmelGr28bA -----  
DmelGr28bE -----  
AgamGr25 -----  
AaegGr43a -----  
DmelGr43a -----  
AgamGr37b -----  
AgamGr37d -----  
AgamGr37a -----  
AgamGr37c -----  
AgamGr37e -----  
AgamGr37f -----  
AaegGr28c -----  
AaegGr28b -----  
AaegGr28e -----  
TcasGr14 -----  
TcasGr49 -----  
AmelGr4 -----  
AmelGr5 -----  
TcasGr16 -----  
TcasGr22 -----  
TcasGr17 -----  
TcasGr150 -----  
TcasGr32 -----  
TcasGr54 -----  
TcasGr37 -----  
TcasGr53 -----  
TcasGr5 -----  
TcasGr12 -----  
TcasGr13 -----  
TcasGr104 -----  
TcasGr45 -----  
TcasGr98 -----  
TcasGr52 -----  
TcasGr105 -----  
TcasGr4 -----  
TcasGr44 -----  
AgamGr9a -----  
AgamGr9c -----  
AgamGr9b -----  
AgamGr9d -----  
AgamGr9e -----  
AgamGr9f -----  
AgamGr9g -----  
AgamGr9i -----  
AgamGr9h -----  
AgamGr9j -----  
AgamGr9l -----  
AgamGr9k -----  
AgamGr9m -----  
AgamGr9n -----  
AgamGr10 -----  
AgamGr11 -----  
DmelGr23aA -----  
DmelGr23aB -----  
DmelGr39aA -----  
DmelGr39aB -----  
DmelGr39aC -----  
DmelGr39aD -----  
DmelGr98c -----



DmelGr98d -----  
DmelGr98b -----  
AgamGr51 -----  
AgamGr52 -----  
DmelGr94a -----  
DmelGr97a -----  
DmelGr93b -----  
DmelGr93c -----  
DmelGr22d -----  
DmelGr22e -----  
DmelGr22a -----  
DmelGr22b -----  
DmelGr22c -----  
DmelGr22f -----  
DmelGr36a -----  
DmelGr36c -----  
DmelGr36b -----  
DmelGr59d -----  
DmelGr59a -----  
DmelGr59b -----  
AgamGr26 -----  
AgamGr27 -----  
AgamGr29 -----  
AgamGr31 -----  
AgamGr30 -----  
AgamGr32a -----  
TcasGr2 -----  
TcasGr9 -----  
TcasGr7 -----  
TcasGr30 -----  
TcasGr29 -----  
AaegGr64f -----  
AaegGr64a3 -----  
AgamGr14 -----  
AgamGr18 -----  
AaegGr64d -----  
AgamGr17 -----  
AaegGr64c -----  
DmelGr64c -----  
DmelGr64d -----  
AgamGr20 -----  
AaegGr61a -----  
AgamGr21 -----  
AaegGr64a -----  
DmelGr64a -----  
DmelGr61a -----  
AgamGr15 -----  
AaegGr1 -----  
DmelGr5a -----  
DmelGr64f -----  
DmelGr64e -----  
AmelGr1 -----  
AmelGr2 -----  
AgamGr16 -----  
AaegGr64e -----  
TCasGr6 -----  
TcasGr26 -----  
TcasGr33 -----  
AgamGr23 -----  
AaegGr21a -----  
TcasGr10 -----  
TcasGr39 -----  
AgamGr22 -----  
AaegGr21b -----  
DmelGr21a -----  
AgamGr24 -----  
AaegGr63a -----  
DmelGr63a -----  
TcasGr3 -----  
DmelOr83b -----

AgamOr7 -----  
HvirOr2 -----  
TcasOr16 -----  
TcasOr22 -----  
AmelOr2 -----  
TcasGr31 -----  
TcasGr35 -----  
DmelGr59c -----  
DmelGr92a -----  
DmelGr28a -----  
DmelGr64b -----  
TcasGr71 -----  
AgamGr19 -----  
AaegGr64b -----  
DmelGr93d -----  
TcasGr34 -----  
TcasGr43 -----  
TcasGr47 -----  
AmelGr3 -----  
AgamGr32b -----  
AgamGr50 -----  
TcasGr20 -----  
TcasGr79 -----  
TcasGr15 -----  
TcasGr60 -----  
AgamGr38 -----  
TcasGr51 -----  
DmelGr39b -----  
AgamGr28 -----  
TcasGr61 -----  
TcasGr50 -----  
AgamGr12 -----  
AgamGr36 -----  
AgamGr48 -----  
AgamGr49a -----  
AgamGr49b -----  
DmelGr2a -----  
DmelGr32a -----  
DmelGr68a -----  
AmelGr7 -----  
AmelGr8 -----  
AmelGr9 -----  
TcasGr57 -----  
TcasGr41 -----  
AgamGr34 -----  
AgamGr35 -----  
AgamGr39 -----  
AgamGr40 -----  
AaegGr28d -----  
AgamGr42 -----  
AgamGr41 -----  
AgamGr43 -----  
DmelGr33a -----  
AgamGr44 -----  
AgamGr13 -----  
AgamGr45 -----  
AgamGr46 -----  
Dmelr93a -----  
AmelGr6 -----  
AmelGr10 -----  
TcasGr28 -----  
TcasGr40 -----  
AgamGr3 -----  
AgamGr4 -----  
AgamGr6 -----  
AgamGr7 -----  
AgamGr47 -----  
DmelGr8a -----  
AgamGr5 -----  
AgamGr8 -----

DmelGr9a -----  
 DmelGr59f -----  
 DmelGr77a -----  
 DmelGr85a -----  
 TcasGr27 -----  
 TcasGr48 -----  
 AgamGr1 -----  
 DmelGr10a -----  
 DmelGr59e -----  
 DmelGr10b -----  
 DmelGr89a -----  
 DmelGr57a -----  
 DmelGr47b -----  
 DmelGr58a -----  
 DmelGr58b -----  
 DmelGr98a -----  
 AaegGr93a -----  
 TcasGr19 -----  
 DmelGr47a -----  
 DmelGr58c -----

TcasGr38 -----  
 TcasGr46 FTIITATSSFVTIHNVIQFLGYFIGLITFVMSQHCVELVSMIKARFVVVNQQIGGIPTY 1282  
 TcasGr1 -----  
 TcasGr123 -----  
 TcasGr62 -----  
 TcasGr25 -----  
 TcasGr59 -----  
 AgamGr2 -----  
 AaegGr66a -----  
 DmelGr66a -----  
 TcasGr11 -----  
 TcasGr55 -----  
 TcasGr21 -----  
 TcasGr56 -----  
 AaegGr -----  
 AaegGr28a -----  
 AgamGr33 -----  
 DmelGr28bB -----  
 DmelGr28bC -----  
 DmelGr28bD -----  
 DmelGr28bA -----  
 DmelGr28bE -----  
 AgamGr25 -----  
 AaegGr43a -----  
 DmelGr43a -----  
 AgamGr37b -----  
 AgamGr37d -----  
 AgamGr37a -----  
 AgamGr37c -----  
 AgamGr37e -----  
 AgamGr37f -----  
 AaegGr28c -----  
 AaegGr28b -----  
 AaegGr28e -----  
 TcasGr14 -----  
 TcasGr49 -----  
 AmelGr4 -----  
 AmelGr5 -----  
 TcasGr16 -----  
 TcasGr22 -----  
 TcasGr17 -----  
 TcasGr150 -----  
 TcasGr32 -----  
 TcasGr54 -----  
 TcasGr37 -----  
 TcasGr53 -----  
 TcasGr5 -----  
 TcasGr12 -----

TcasGr13 -----  
TcasGr104 -----  
TcasGr45 -----  
TcasGr98 -----  
TcasGr52 -----  
TcasGr105 -----  
TcasGr4 -----  
TcasGr44 -----  
AgamGr9a -----  
AgamGr9c -----  
AgamGr9b -----  
AgamGr9d -----  
AgamGr9e -----  
AgamGr9f -----  
AgamGr9g -----  
AgamGr9i -----  
AgamGr9h -----  
AgamGr9j -----  
AgamGr9l -----  
AgamGr9k -----  
AgamGr9m -----  
AgamGr9n -----  
AgamGr10 -----  
AgamGr11 -----  
DmelGr23aA -----  
DmelGr23aB -----  
DmelGr39aA -----  
DmelGr39aB -----  
DmelGr39aC -----  
DmelGr39aD -----  
DmelGr98c -----  
DmelGr98d -----  
DmelGr98b -----  
AgamGr51 -----  
AgamGr52 -----  
DmelGr94a -----  
DmelGr97a -----  
DmelGr93b -----  
DmelGr93c -----  
DmelGr22d -----  
DmelGr22e -----  
DmelGr22a -----  
DmelGr22b -----  
DmelGr22c -----  
DmelGr22f -----  
DmelGr36a -----  
DmelGr36c -----  
DmelGr36b -----  
DmelGr59d -----  
DmelGr59a -----  
DmelGr59b -----  
AgamGr26 -----  
AgamGr27 -----  
AgamGr29 -----  
AgamGr31 -----  
AgamGr30 -----  
AgamGr32a -----  
TcasGr2 -----  
TcasGr9 -----  
TcasGr7 -----  
TcasGr30 -----  
TcasGr29 -----  
AaegGr64f -----  
AaegGr64a3 -----  
AgamGr14 -----  
AgamGr18 -----  
AaegGr64d -----  
AgamGr17 -----  
AaegGr64c -----  
DmelGr64c -----

DmelGr64d -----  
AgamGr20 -----  
AaegGr61a -----  
AgamGr21 -----  
AaegGr64a -----  
DmelGr64a -----  
DmelGr61a -----  
AgamGr15 -----  
AaegGr1 -----  
DmelGr5a -----  
DmelGr64f -----  
DmelGr64e -----  
AmelGr1 -----  
AmelGr2 -----  
AgamGr16 -----  
AaegGr64e -----  
TCasGr6 -----  
TcasGr26 -----  
TcasGr33 -----  
AgamGr23 -----  
AaegGr21a -----  
TcasGr10 -----  
TcasGr39 -----  
AgamGr22 -----  
AaegGr21b -----  
DmelGr21a -----  
AgamGr24 -----  
AaegGr63a -----  
DmelGr63a -----  
TcasGr3 -----  
DmelOr83b -----  
AgamOr7 -----  
HvirOr2 -----  
TcasOr16 -----  
TcasOr22 -----  
AmelOr2 -----  
TcasGr31 -----  
TcasGr35 -----  
DmelGr59c -----  
DmelGr92a -----  
DmelGr28a -----  
DmelGr64b -----  
TcasGr71 -----  
AgamGr19 -----  
AaegGr64b -----  
DmelGr93d -----  
TcasGr34 -----  
TcasGr43 -----  
TcasGr47 -----  
AmelGr3 -----  
AgamGr32b -----  
AgamGr50 -----  
TcasGr20 -----  
TcasGr79 -----  
TcasGr15 -----  
TcasGr60 -----  
AgamGr38 -----  
TcasGr51 -----  
DmelGr39b -----  
AgamGr28 -----  
TcasGr61 -----  
TcasGr50 -----  
AgamGr12 -----  
AgamGr36 -----  
AgamGr48 -----  
AgamGr49a -----  
AgamGr49b -----  
DmelGr2a -----  
DmelGr32a -----  
DmelGr68a -----

AmelGr7 -----  
 AmelGr8 -----  
 AmelGr9 -----  
 TcasGr57 -----  
 TcasGr41 -----  
 AgamGr34 -----  
 AgamGr35 -----  
 AgamGr39 -----  
 AgamGr40 -----  
 AaegGr28d -----  
 AgamGr42 -----  
 AgamGr41 -----  
 AgamGr43 -----  
 DmelGr33a -----  
 AgamGr44 -----  
 AgamGr13 -----  
 AgamGr45 -----  
 AgamGr46 -----  
 Dmelr93a -----  
 AmelGr6 -----  
 AmelGr10 -----  
 TcasGr28 -----  
 TcasGr40 -----  
 AgamGr3 -----  
 AgamGr4 -----  
 AgamGr6 -----  
 AgamGr7 -----  
 AgamGr47 -----  
 DmelGr8a -----  
 AgamGr5 -----  
 AgamGr8 -----  
 DmelGr9a -----  
 DmelGr59f -----  
 DmelGr77a -----  
 DmelGr85a -----  
 TcasGr27 -----  
 TcasGr48 -----  
 AgamGr1 -----  
 DmelGr10a -----  
 DmelGr59e -----  
 DmelGr10b -----  
 DmelGr89a -----  
 DmelGr57a -----  
 DmelGr47b -----  
 DmelGr58a -----  
 DmelGr58b -----  
 DmelGr98a -----  
 AaegGr93a -----  
 TcasGr19 -----  
 DmelGr47a -----  
 DmelGr58c -----

TcasGr38 -----  
 TcasGr46 FSTNLPKRETEVRKKS LDFGKLC SLHHHLSKLIK SFNEIYGVPLLLFFGLNFLIITQAMF 1342  
 TcasGr1 -----  
 TcasGr123 -----  
 TcasGr62 -----  
 TcasGr25 -----  
 TcasGr59 -----  
 AgamGr2 -----  
 AaegGr66a -----  
 DmelGr66a -----  
 TcasGr11 -----  
 TcasGr55 -----  
 TcasGr21 -----  
 TcasGr56 -----  
 AaegGr -----  
 AaegGr28a -----  
 AgamGr33 -----

DmelGr28bB -----  
DmelGr28bC -----  
DmelGr28bD -----  
DmelGr28bA -----  
DmelGr28bE -----  
AgamGr25 -----  
AaegGr43a -----  
DmelGr43a -----  
AgamGr37b -----  
AgamGr37d -----  
AgamGr37a -----  
AgamGr37c -----  
AgamGr37e -----  
AgamGr37f -----  
AaegGr28c -----  
AaegGr28b -----  
AaegGr28e -----  
TcasGr14 -----  
TcasGr49 -----  
AmelGr4 -----  
AmelGr5 -----  
TcasGr16 -----  
TcasGr22 -----  
TcasGr17 -----  
TcasGr150 -----  
TcasGr32 -----  
TcasGr54 -----  
TcasGr37 -----  
TcasGr53 -----  
TcasGr5 -----  
TcasGr12 -----  
TcasGr13 -----  
TcasGr104 -----  
TcasGr45 -----  
TcasGr98 -----  
TcasGr52 -----  
TcasGr105 -----  
TcasGr4 -----  
TcasGr44 -----  
AgamGr9a -----  
AgamGr9c -----  
AgamGr9b -----  
AgamGr9d -----  
AgamGr9e -----  
AgamGr9f -----  
AgamGr9g -----  
AgamGr9i -----  
AgamGr9h -----  
AgamGr9j -----  
AgamGr9l -----  
AgamGr9k -----  
AgamGr9m -----  
AgamGr9n -----  
AgamGr10 -----  
AgamGr11 -----  
DmelGr23aA -----  
DmelGr23aB -----  
DmelGr39aA -----  
DmelGr39aB -----  
DmelGr39aC -----  
DmelGr39aD -----  
DmelGr98c -----  
DmelGr98d -----  
DmelGr98b -----  
AgamGr51 -----  
AgamGr52 -----  
DmelGr94a -----  
DmelGr97a -----  
DmelGr93b -----  
DmelGr93c -----

DmelGr22d -----  
DmelGr22e -----  
DmelGr22a -----  
DmelGr22b -----  
DmelGr22c -----  
DmelGr22f -----  
DmelGr36a -----  
DmelGr36c -----  
DmelGr36b -----  
DmelGr59d -----  
DmelGr59a -----  
DmelGr59b -----  
AgamGr26 -----  
AgamGr27 -----  
AgamGr29 -----  
AgamGr31 -----  
AgamGr30 -----  
AgamGr32a -----  
TcasGr2 -----  
TcasGr9 -----  
TcasGr7 -----  
TcasGr30 -----  
TcasGr29 -----  
AaegGr64f -----  
AaegGr64a3 -----  
AgamGr14 -----  
AgamGr18 -----  
AaegGr64d -----  
AgamGr17 -----  
AaegGr64c -----  
DmelGr64c -----  
DmelGr64d -----  
AgamGr20 -----  
AaegGr61a -----  
AgamGr21 -----  
AaegGr64a -----  
DmelGr64a -----  
DmelGr61a -----  
AgamGr15 -----  
AaegGr1 -----  
DmelGr5a -----  
DmelGr64f -----  
DmelGr64e -----  
AmelGr1 -----  
AmelGr2 -----  
AgamGr16 -----  
AaegGr64e -----  
TCasGr6 -----  
TcasGr26 -----  
TcasGr33 -----  
AgamGr23 -----  
AaegGr21a -----  
TcasGr10 -----  
TcasGr39 -----  
AgamGr22 -----  
AaegGr21b -----  
DmelGr21a -----  
AgamGr24 -----  
AaegGr63a -----  
DmelGr63a -----  
TcasGr3 -----  
DmelOr83b -----  
AgamOr7 -----  
HvirOr2 -----  
TcasOr16 -----  
TcasOr22 -----  
AmelOr2 -----  
TcasGr31 -----  
TcasGr35 -----  
DmelGr59c -----



DmelGr92a -----  
DmelGr28a -----  
DmelGr64b -----  
TcasGr71 -----  
AgamGr19 -----  
AaegGr64b -----  
DmelGr93d -----  
TcasGr34 -----  
TcasGr43 -----  
TcasGr47 -----  
AmelGr3 -----  
AgamGr32b -----  
AgamGr50 -----  
TcasGr20 -----  
TcasGr79 -----  
TcasGr15 -----  
TcasGr60 -----  
AgamGr38 -----  
TcasGr51 -----  
DmelGr39b -----  
AgamGr28 -----  
TcasGr61 -----  
TcasGr50 -----  
AgamGr12 -----  
AgamGr36 -----  
AgamGr48 -----  
AgamGr49a -----  
AgamGr49b -----  
DmelGr2a -----  
DmelGr32a -----  
DmelGr68a -----  
AmelGr7 -----  
AmelGr8 -----  
AmelGr9 -----  
TcasGr57 -----  
TcasGr41 -----  
AgamGr34 -----  
AgamGr35 -----  
AgamGr39 -----  
AgamGr40 -----  
AaegGr28d -----  
AgamGr42 -----  
AgamGr41 -----  
AgamGr43 -----  
DmelGr33a -----  
AgamGr44 -----  
AgamGr13 -----  
AgamGr45 -----  
AgamGr46 -----  
Dmelr93a -----  
AmelGr6 -----  
AmelGr10 -----  
TcasGr28 -----  
TcasGr40 -----  
AgamGr3 -----  
AgamGr4 -----  
AgamGr6 -----  
AgamGr7 -----  
AgamGr47 -----  
DmelGr8a -----  
AgamGr5 -----  
AgamGr8 -----  
DmelGr9a -----  
DmelGr59f -----  
DmelGr77a -----  
DmelGr85a -----  
TcasGr27 -----  
TcasGr48 -----  
AgamGr1 -----  
DmelGr10a -----

DmelGr59e -----  
DmelGr10b -----  
DmelGr89a -----  
DmelGr57a -----  
DmelGr47b -----  
DmelGr58a -----  
DmelGr58b -----  
DmelGr98a -----  
AaegGr93a -----  
TcasGr19 -----  
DmelGr47a -----  
DmelGr58c -----

TcasGr38 -----  
TcasGr46 LVVVGQLQASQIHWQKIIIIIVMSSVTYGIDTVAVCDACYSTIEEKNLQVNESGKLIHKIDA 1402  
TcasGr1 -----  
TcasGr123 -----  
TcasGr62 -----  
TcasGr25 -----  
TcasGr59 -----  
AgamGr2 -----  
AaegGr66a -----  
DmelGr66a -----  
TcasGr11 -----  
TcasGr55 -----  
TcasGr21 -----  
TcasGr56 -----  
AaegGr -----  
AaegGr28a -----  
AgamGr33 -----  
DmelGr28bB -----  
DmelGr28bC -----  
DmelGr28bD -----  
DmelGr28bA -----  
DmelGr28bE -----  
AgamGr25 -----  
AaegGr43a -----  
DmelGr43a -----  
AgamGr37b -----  
AgamGr37d -----  
AgamGr37a -----  
AgamGr37c -----  
AgamGr37e -----  
AgamGr37f -----  
AaegGr28c -----  
AaegGr28b -----  
AaegGr28e -----  
TcasGr14 -----  
TcasGr49 -----  
AmelGr4 -----  
AmelGr5 -----  
TcasGr16 -----  
TcasGr22 -----  
TcasGr17 -----  
TcasGr150 -----  
TcasGr32 -----  
TcasGr54 -----  
TcasGr37 -----  
TcasGr53 -----  
TcasGr5 -----  
TcasGr12 -----  
TcasGr13 -----  
TcasGr104 -----  
TcasGr45 -----  
TcasGr98 -----  
TcasGr52 -----  
TcasGr105 -----  
TcasGr4 -----  
TcasGr44 -----

AgamGr9a -----  
AgamGr9c -----  
AgamGr9b -----  
AgamGr9d -----  
AgamGr9e -----  
AgamGr9f -----  
AgamGr9g -----  
AgamGr9i -----  
AgamGr9h -----  
AgamGr9j -----  
AgamGr9l -----  
AgamGr9k -----  
AgamGr9m -----  
AgamGr9n -----  
AgamGr10 -----  
AgamGr11 -----  
DmelGr23aA -----  
DmelGr23aB -----  
DmelGr39aA -----  
DmelGr39aB -----  
DmelGr39aC -----  
DmelGr39aD -----  
DmelGr98c -----  
DmelGr98d -----  
DmelGr98b -----  
AgamGr51 -----  
AgamGr52 -----  
DmelGr94a -----  
DmelGr97a -----  
DmelGr93b -----  
DmelGr93c -----  
DmelGr22d -----  
DmelGr22e -----  
DmelGr22a -----  
DmelGr22b -----  
DmelGr22c -----  
DmelGr22f -----  
DmelGr36a -----  
DmelGr36c -----  
DmelGr36b -----  
DmelGr59d -----  
DmelGr59a -----  
DmelGr59b -----  
AgamGr26 -----  
AgamGr27 -----  
AgamGr29 -----  
AgamGr31 -----  
AgamGr30 -----  
AgamGr32a -----  
TcasGr2 -----  
TcasGr9 -----  
TcasGr7 -----  
TcasGr30 -----  
TcasGr29 -----  
AaegGr64f -----  
AaegGr64a3 -----  
AgamGr14 -----  
AgamGr18 -----  
AaegGr64d -----  
AgamGr17 -----  
AaegGr64c -----  
DmelGr64c -----  
DmelGr64d -----  
AgamGr20 -----  
AaegGr61a -----  
AgamGr21 -----  
AaegGr64a -----  
DmelGr64a -----  
DmelGr61a -----  
AgamGr15 -----

|           |       |
|-----------|-------|
| AaegGr1   | ----- |
| DmelGr5a  | ----- |
| DmelGr64f | ----- |
| DmelGr64e | ----- |
| AmelGr1   | ----- |
| AmelGr2   | ----- |
| AgamGr16  | ----- |
| AaegGr64e | ----- |
| TCasGr6   | ----- |
| TcasGr26  | ----- |
| TcasGr33  | ----- |
| AgamGr23  | ----- |
| AaegGr21a | ----- |
| TcasGr10  | ----- |
| TcasGr39  | ----- |
| AgamGr22  | ----- |
| AaegGr21b | ----- |
| DmelGr21a | ----- |
| AgamGr24  | ----- |
| AaegGr63a | ----- |
| DmelGr63a | ----- |
| TcasGr3   | ----- |
| DmelOr83b | ----- |
| AgamOr7   | ----- |
| HvirOr2   | ----- |
| TcasOr16  | ----- |
| TcasOr22  | ----- |
| AmelOr2   | ----- |
| TcasGr31  | ----- |
| TcasGr35  | ----- |
| DmelGr59c | ----- |
| DmelGr92a | ----- |
| DmelGr28a | ----- |
| DmelGr64b | ----- |
| TcasGr71  | ----- |
| AgamGr19  | ----- |
| AaegGr64b | ----- |
| DmelGr93d | ----- |
| TcasGr34  | ----- |
| TcasGr43  | ----- |
| TcasGr47  | ----- |
| AmelGr3   | ----- |
| AgamGr32b | ----- |
| AgamGr50  | ----- |
| TcasGr20  | ----- |
| TcasGr79  | ----- |
| TcasGr15  | ----- |
| TcasGr60  | ----- |
| AgamGr38  | ----- |
| TcasGr51  | ----- |
| DmelGr39b | ----- |
| AgamGr28  | ----- |
| TcasGr61  | ----- |
| TcasGr50  | ----- |
| AgamGr12  | ----- |
| AgamGr36  | ----- |
| AgamGr48  | ----- |
| AgamGr49a | ----- |
| AgamGr49b | ----- |
| DmelGr2a  | ----- |
| DmelGr32a | ----- |
| DmelGr68a | ----- |
| AmelGr7   | ----- |
| AmelGr8   | ----- |
| AmelGr9   | ----- |
| TcasGr57  | ----- |
| TcasGr41  | ----- |
| AgamGr34  | ----- |
| AgamGr35  | ----- |
| AgamGr39  | ----- |

AgamGr40 -----  
 AaegGr28d -----  
 AgamGr42 -----  
 AgamGr41 -----  
 AgamGr43 -----  
 DmelGr33a -----  
 AgamGr44 -----  
 AgamGr13 -----  
 AgamGr45 -----  
 AgamGr46 -----  
 Dmelr93a -----  
 AmelGr6 -----  
 AmelGr10 -----  
 TcasGr28 -----  
 TcasGr40 -----  
 AgamGr3 -----  
 AgamGr4 -----  
 AgamGr6 -----  
 AgamGr7 -----  
 AgamGr47 -----  
 DmelGr8a -----  
 AgamGr5 -----  
 AgamGr8 -----  
 DmelGr9a -----  
 DmelGr59f -----  
 DmelGr77a -----  
 DmelGr85a -----  
 TcasGr27 -----  
 TcasGr48 -----  
 AgamGr1 -----  
 DmelGr10a -----  
 DmelGr59e -----  
 DmelGr10b -----  
 DmelGr89a -----  
 DmelGr57a -----  
 DmelGr47b -----  
 DmelGr58a -----  
 DmelGr58b -----  
 DmelGr98a -----  
 AaegGr93a -----  
 TcasGr19 -----  
 DmelGr47a -----  
 DmelGr58c -----

TcasGr38 -----  
 TcasGr46 QDCDFVDEIEMFSMFERFHVNKLHFLQLIIGGVTTYIIILIQLSASLKQ 1451  
 TcasGr1 -----  
 TcasGr123 -----  
 TcasGr62 -----  
 TcasGr25 -----  
 TcasGr59 -----  
 AgamGr2 -----  
 AaegGr66a -----  
 DmelGr66a -----  
 TcasGr11 -----  
 TcasGr55 -----  
 TcasGr21 -----  
 TcasGr56 -----  
 AaegGr -----  
 AaegGr28a -----  
 AgamGr33 -----  
 DmelGr28bB -----  
 DmelGr28bC -----  
 DmelGr28bD -----  
 DmelGr28bA -----  
 DmelGr28bE -----  
 AgamGr25 -----  
 AaegGr43a -----  
 DmelGr43a -----

AgamGr37b -----  
AgamGr37d -----  
AgamGr37a -----  
AgamGr37c -----  
AgamGr37e -----  
AgamGr37f -----  
AaegGr28c -----  
AaegGr28b -----  
AaegGr28e -----  
TcasGr14 -----  
TcasGr49 -----  
AmelGr4 -----  
AmelGr5 -----  
TcasGr16 -----  
TcasGr22 -----  
TcasGr17 -----  
TcasGr150 -----  
TcasGr32 -----  
TcasGr54 -----  
TcasGr37 -----  
TcasGr53 -----  
TcasGr5 -----  
TcasGr12 -----  
TcasGr13 -----  
TcasGr104 -----  
TcasGr45 -----  
TcasGr98 -----  
TcasGr52 -----  
TcasGr105 -----  
TcasGr4 -----  
TcasGr44 -----  
AgamGr9a -----  
AgamGr9c -----  
AgamGr9b -----  
AgamGr9d -----  
AgamGr9e -----  
AgamGr9f -----  
AgamGr9g -----  
AgamGr9i -----  
AgamGr9h -----  
AgamGr9j -----  
AgamGr9l -----  
AgamGr9k -----  
AgamGr9m -----  
AgamGr9n -----  
AgamGr10 -----  
AgamGr11 -----  
DmelGr23aA -----  
DmelGr23aB -----  
DmelGr39aA -----  
DmelGr39aB -----  
DmelGr39aC -----  
DmelGr39aD -----  
DmelGr98c -----  
DmelGr98d -----  
DmelGr98b -----  
AgamGr51 -----  
AgamGr52 -----  
DmelGr94a -----  
DmelGr97a -----  
DmelGr93b -----  
DmelGr93c -----  
DmelGr22d -----  
DmelGr22e -----  
DmelGr22a -----  
DmelGr22b -----  
DmelGr22c -----  
DmelGr22f -----  
DmelGr36a -----  
DmelGr36c -----

|            |       |
|------------|-------|
| DmelGr36b  | ----- |
| DmelGr59d  | ----- |
| DmelGr59a  | ----- |
| DmelGr59b  | ----- |
| AgamGr26   | ----- |
| AgamGr27   | ----- |
| AgamGr29   | ----- |
| AgamGr31   | ----- |
| AgamGr30   | ----- |
| AgamGr32a  | ----- |
| TcasGr2    | ----- |
| TcasGr9    | ----- |
| TcasGr7    | ----- |
| TcasGr30   | ----- |
| TcasGr29   | ----- |
| AaegGr64f  | ----- |
| AaegGr64a3 | ----- |
| AgamGr14   | ----- |
| AgamGr18   | ----- |
| AaegGr64d  | ----- |
| AgamGr17   | ----- |
| AaegGr64c  | ----- |
| DmelGr64c  | ----- |
| DmelGr64d  | ----- |
| AgamGr20   | ----- |
| AaegGr61a  | ----- |
| AgamGr21   | ----- |
| AaegGr64a  | ----- |
| DmelGr64a  | ----- |
| DmelGr61a  | ----- |
| AgamGr15   | ----- |
| AaegGr1    | ----- |
| DmelGr5a   | ----- |
| DmelGr64f  | ----- |
| DmelGr64e  | ----- |
| AmelGr1    | ----- |
| AmelGr2    | ----- |
| AgamGr16   | ----- |
| AaegGr64e  | ----- |
| TCasGr6    | ----- |
| TcasGr26   | ----- |
| TcasGr33   | ----- |
| AgamGr23   | ----- |
| AaegGr21a  | ----- |
| TcasGr10   | ----- |
| TcasGr39   | ----- |
| AgamGr22   | ----- |
| AaegGr21b  | ----- |
| DmelGr21a  | ----- |
| AgamGr24   | ----- |
| AaegGr63a  | ----- |
| DmelGr63a  | ----- |
| TcasGr3    | ----- |
| DmelOr83b  | ----- |
| AgamOr7    | ----- |
| HvirOr2    | ----- |
| TcasOr16   | ----- |
| TcasOr22   | ----- |
| AmelOr2    | ----- |
| TcasGr31   | ----- |
| TcasGr35   | ----- |
| DmelGr59c  | ----- |
| DmelGr92a  | ----- |
| DmelGr28a  | ----- |
| DmelGr64b  | ----- |
| TcasGr71   | ----- |
| AgamGr19   | ----- |
| AaegGr64b  | ----- |
| DmelGr93d  | ----- |
| TcasGr34   | ----- |

|           |       |
|-----------|-------|
| TcasGr43  | ----- |
| TcasGr47  | ----- |
| AmelGr3   | ----- |
| AgamGr32b | ----- |
| AgamGr50  | ----- |
| TcasGr20  | ----- |
| TcasGr79  | ----- |
| TcasGr15  | ----- |
| TcasGr60  | ----- |
| AgamGr38  | ----- |
| TcasGr51  | ----- |
| DmelGr39b | ----- |
| AgamGr28  | ----- |
| TcasGr61  | ----- |
| TcasGr50  | ----- |
| AgamGr12  | ----- |
| AgamGr36  | ----- |
| AgamGr48  | ----- |
| AgamGr49a | ----- |
| AgamGr49b | ----- |
| DmelGr2a  | ----- |
| DmelGr32a | ----- |
| DmelGr68a | ----- |
| AmelGr7   | ----- |
| AmelGr8   | ----- |
| AmelGr9   | ----- |
| TcasGr57  | ----- |
| TcasGr41  | ----- |
| AgamGr34  | ----- |
| AgamGr35  | ----- |
| AgamGr39  | ----- |
| AgamGr40  | ----- |
| AaegGr28d | ----- |
| AgamGr42  | ----- |
| AgamGr41  | ----- |
| AgamGr43  | ----- |
| DmelGr33a | ----- |
| AgamGr44  | ----- |
| AgamGr13  | ----- |
| AgamGr45  | ----- |
| AgamGr46  | ----- |
| Dmelr93a  | ----- |
| AmelGr6   | ----- |
| AmelGr10  | ----- |
| TcasGr28  | ----- |
| TcasGr40  | ----- |
| AgamGr3   | ----- |
| AgamGr4   | ----- |
| AgamGr6   | ----- |
| AgamGr7   | ----- |
| AgamGr47  | ----- |
| DmelGr8a  | ----- |
| AgamGr5   | ----- |
| AgamGr8   | ----- |
| DmelGr9a  | ----- |
| DmelGr59f | ----- |
| DmelGr77a | ----- |
| DmelGr85a | ----- |
| TcasGr27  | ----- |
| TcasGr48  | ----- |
| AgamGr1   | ----- |
| DmelGr10a | ----- |
| DmelGr59e | ----- |
| DmelGr10b | ----- |
| DmelGr89a | ----- |
| DmelGr57a | ----- |
| DmelGr47b | ----- |
| DmelGr58a | ----- |
| DmelGr58b | ----- |
| DmelGr98a | ----- |



AaegGr93a  
TcasGr19  
DmelGr47a  
DmelGr58c

-----  
-----  
-----  
-----

# D

|           |                                                        |    |
|-----------|--------------------------------------------------------|----|
| TcasOr16  | -----MMKFKVTGLVADLMPNIRLIQASG                          | 24 |
| AmelOr2   | -----MMKFKQQGLIADLMPNINLMKATG                          | 24 |
| AgamOr7   | -----MQVQPTKYVGLVADLMPNIRLMQASG                        | 26 |
| AaegOr7   | -----MPNIRLMQGGFG                                      | 11 |
| DmelOr83b | -----MTTSMQPSKYTGLVADLMPNIRAMKYSG                      | 28 |
| BmorOr2   | -----MMTKVKTQGLVTDLMPICIRLLQAAG                        | 25 |
| BmorOr2a  | -----MMTKVKTQGLVTDLMPICIRLLQAAG                        | 25 |
| HvirOr2   | -----MMTKVKAQGLVSDLMPNIKLMQMAG                         | 25 |
| AgamOr56  | -----MDIVSKQGEFPLVKLSTKLLRIIR                          | 24 |
| AgamOr57  | -----MDIVSKQGEFPLVKLSTKLLRIIR                          | 24 |
| AgamOr26  | -----MDSNSKKDTFPLIQISTKMLQIIR                          | 24 |
| AgamOr27  | -----MKPSCKEGVFPLINLSIKLLKIVG                          | 24 |
| HvirOr9   | -----MVDQFQKCLKSVNLYLKF IGL--                          | 21 |
| HvirOr7   | -----                                                  |    |
| DmelOr85b | -----MEKLMKYASFFYTAVG---                               | 16 |
| DmelOr85c | -----MKFMKYAVFFYTSVG---                                | 15 |
| DmelOr85d | -----MLTKKDTQSAKEQEKLKA IPLHSFLKYANVFYLSIG---          | 36 |
| DmelOr67a | -----MDNVAEMPEEKYVEVDDFLRLAVKFYNTLG---                 | 30 |
| DmelOr67c | -----METAKDNTARTFMELMRVPVQFYRTIG---                    | 27 |
| DmelOr92a | -----MLFRKRKPKSDDEVITFDELTRFPMTFYKTIG---               | 32 |
| DmelOr69a | -----MQLHDHMKYIDLGCKMACIPR                             | 21 |
| DmelOr69b | -----MQLEDFMRYPDLCVQAAQLPR                             | 21 |
| TcasOr6   | -----                                                  |    |
| TcasOr11  | -----MGK                                               | 3  |
| AgamOr41  | -----MSEHP IHTFD                                       | 10 |
| AgamOr42  | -----METHIGKQHSLERFQ                                   | 15 |
| AgamOr43  | -----MTFTLSHDLYV                                       | 11 |
| AgamOr44  | -----MTFTLSHDLYV                                       | 11 |
| AgamOr66  | -----MEASEKFS                                          | 8  |
| AgamOr67  | -----MEASEKFC                                          | 8  |
| AgamOr72  | -----MANVEGFR                                          | 8  |
| AgamOr73  | -----MANVEEFR                                          | 8  |
| AgamOr71  | -----MANVKDFR                                          | 8  |
| AgamOr74  | -----MANVEGFR                                          | 8  |
| AgamOr70  | -----MATIESFR                                          | 8  |
| AgamOr69  | -----MATVESFR                                          | 8  |
| TcasOr9   | -----                                                  |    |
| TcasOr18  | -----MAKLE                                             | 5  |
| DmelOr83a | -----MKSTFKEEKIKDDSKRRDLFVVRQTMCI AAMYPPFG             | 36 |
| DmelOr85e | -----MASLQFHGNVDADIRYDISLDPARES NLFRLLMGLQLANGTKPSP    | 45 |
| TcasOr24  | -----MTEEKQLR ICLSSC                                   | 14 |
| TcasOr25  | -----MTEEKELRLCLWSC                                    | 14 |
| TcasOr19  | -----MVLLPT                                            | 6  |
| TcasOr22  | -----MAKDSSPVLQESI                                     | 13 |
| TcasOr23  | -----MAKDTSPVLRESI                                     | 13 |
| AmelOr168 | -----MNFQNLNRLNALA                                     | 13 |
| AmelOr170 | -----MNFQNLNRLNAFA                                     | 13 |
| AmelOr169 | -----MKMNFQNLNRLNTFV                                   | 15 |
| DmelOr65b | -----MEASHSS IYYWREQM                                  | 15 |
| DmelOr65c | -----MESSYSAVYYWREQM                                   | 15 |
| DmelOr65a | -----MTELRSERKNGNWDRLF GPF FESWAVFKAPQAKSRHI IAYWTRDQL | 46 |
| TcasOr17  | -----MSNFSWKA AVETNITTL                                | 17 |
| TcasOr21  | -----MEKYDWMQA IKTNILIL                                | 17 |
| TcasOr56  | -----MTATKSLKE I PPIYLRVHLTVL                          | 22 |
| TcasOr15  | -----MSKNLKE I PPVYLKVHLTVL                            | 20 |
| AgamOr9   | -----MVRLF -FSKTRVT -KLFTRKDERPEMFLPSLRMILFIF          | 36 |
| AgamOr65  | -----MVKFFRCCKARVSP ELLSKKNEKPEAF LPSLRMILFIF          | 38 |
| BmorOr6   | -----MTMRTNAKSFLFVPSKVLTLC                             | 21 |
| BmorOr10  | -----MMGNSTDLFLDRTKRILNFF                              | 20 |
| AgamOr34  | -----MYDPGRFIFPMRFSMWAW                                | 18 |
| AgamOr37  | -----MEAEKQDTPTSDDPYRWGDYIRPVRITVWTW                   | 31 |
| DmelOr94a | -----MDKHKDRIESMR LILQVM                               | 18 |
| DmelOr94b | -----MES -TNRLSAIQ TLLVIQ                              | 17 |
| DmelOr71a | -----MDYDRIRPVRFLTGVL                                  | 16 |
| DmelOr46a | -----MSKGVEIF YKQKAF LNIL                              | 19 |
| DmelOr46b | -----MVT -EDFYKYQVWFQIL                                | 17 |
| HvirOr8   | -----MVFRQIDCFKINMKFL                                  | 16 |
| BmorOr8   | -----MMTLVYQTDIFKPNVFFW                                | 18 |

AmelOr68 -----MTLLQPIFNIL 11  
AmelOr69 -----MQLLRTIYHLL 11  
AmelOr70 -----MQALQWTRFLL 11  
AmelOr71 -----MRILRWTFLLF 11  
AmelOr72 -----MHLLRWTFKLF 11  
DmelOr19a -----MDIS--KVDSTRALVNH 16  
DmelOr19b -----MDIS--KVDSTRALVNH 16  
DmelOr33a -----MDSR-RKVRSENYKTYW 17  
DmelOr33b -----MDLKPRVIRSEDIYRTY 18  
DmelOr22a -----MLSKFFPHIKEKPLSERVKS RDAFIYLD 28  
DmelOr22b -----MLSQFFPHIKEKPLSERVKS RDAFVYLD 28  
DmelOr42b -----MVFELIRPAPLTEQKR SRDGCYLY 25  
DmelOr59b -----MAVFKLIKAPLTEKVQSRQGN IYLY 26  
DmelOr59c -----MTKFFFKRLQTAPLDQEV SSLDASDYYY 28  
DmelOr98a -----MLFNYL RKPNTNLLTSPDSFRYFE 25  
DmelOr42a -----MDLRRWFPTLYTQSKD SPVRSR DATLYLL 29  
DmelOr85a -----MIFKYIQEPVLGSLFRS RDSL IYLN 25  
DmelOr43b -----MFGHFKLVPAPISEPIQSR DS NAYMM 27  
AgamOr2 -----MLIEECP IIGVNV 13  
AgamOr10 -----MEVLNCP LLSVNV 13  
DmelOr30a -----MELKSMDPVEMPIFGSTL 18  
DmelOr49b -----MFEDIQLIYMN-- I 12  
DmelOr43a -----MTIEDIGLVGINV 13  
AgamOr32 -----MSQLNEFPAYQF 12  
AgamOr35 -----MSCVEDFLDAQM 12  
DmelOr47a -----MDSFLQVQKSTI 12  
DmelOr98b -----MLTDKFLRLQSALF 14  
DmelOr9a -----MSDKVKGKKQEEKDQSLRV QILVY 24  
AgamOr38 -----MIITVAPVTDAR-PQTPED CGMFKFQRKIL 29  
AgamOr39 -----MVSFGAAASNPRDAETTPHWD IFLQRKIL 30  
DmelOr24a -----MERHYFMVPKFAL 13  
DmelOr45b -----MYPRFLSRNYPLAKHLFFV TRYSF 24  
AmelOr74 -----MQGEGYTDVSLKVSQFLL 18  
AmelOr86 -----MHATPYS DVSIVVSQFLL 18  
AmelOr75 -----MRRRGSKD VSI IWT SFLM 18  
AmelOr84 -----MRSTRDIS I IWT SFLM 16  
AmelOr87 -----MGAKAVAKVVAH SKLVARHSNKDFALSMTAFLM 33  
AmelOr76 -----MKSKEVR-DLSITVTA FYM 18  
AmelOr85 -----MSSNKVGGDLSITVMTFY M 19  
AmelOr88 -----MNGRNVR-NLSITVTA FYM 18  
AmelOr91 -----MS--FLES DVS VSLTSIFM 17  
AmelOr92 -----MN--FLENDVA VSLTSIFM 17  
AmelOr95 -----MKNDDFSINLSSIFI 15  
AmelOr93 -----MN--FLES DVSX---IFM 13  
AmelOr77 -----MNGLLNGGDASMTMTAAFM 19  
AmelOr94 -----MTLK YRGDVSFSLATFFL 18  
AmelOr96 -----MNLKYRKDLAFTVASFY L 18  
AmelOr79 -----MQAEYRLDISINLSTFFL 18  
AmelOr83 -----MQTDNQLDISISLSTFFL 18  
AmelOr80 -----MQTESQLDISINLSTFFL 18  
AmelOr81 -----MQTESQVDISMNLSTFFL 18  
AmelOr82 -----MQTESQVDISMNLSTFFL 18  
AmelOr78 -----MQSENQLDVSITLSTFFL 18  
AmelOr89 -----MQREVELDVS VNLAAFFL 18  
AmelOr90 -----MEKELDISVNLSSFFL 16  
AmelOr142 -----MKNRLTPEKAILFTKLSV 18  
AmelOr146 -----MFRNATPEKAI AFTQFIV 18  
AmelOr148 -----MLKYVTPEKGIYIVWLSV 18  
AmelOr158 -----MLKQITPEKSIYI IWLSV 18  
AmelOr147 -----MLKQVSPEKGIYI IWLSV 18  
AmelOr150 -----MLKQLTPEKAIHITWISV 18  
AmelOr151 -----MLKQLTPEKVIYITWVSV 18  
AmelOr152 -----MLKQIISEKTIQI IWFSV 18  
AmelOr154 -----MLKKVTPENVIYI IRLSV 18  
AmelOr155 -----MLKKATPEKIIDIIRFSV 18  
AmelOr157 -----MRRARPEKSVYLWVLSV 17  
AmelOr156 -----MIEQVMLKRVYITWLSV 18  
AmelOr153 -----MVKEMIPEKTIHITWLSV 18  
AmelOr144 -----MGMLNMDIRQVLHILELTG 19  
AmelOr145 -----MGMLNMNIRQVFYILELTG 19

AmelOr143 -----MNIRQILYILELIG 14  
AmelOr1 -----MENTTNYRNIHYKSDAEYTVHVAKTLL 27  
AmelOr3 -----MSVKTARNIRDYHNIHYRSDAEYTVRVAKILL 32  
AmelOr6 -----METK--EKDLKQAFY-AQPFL 18  
AmelOr7 -----METK--EKDLKQAFY-AQPFL 18  
AmelOr4 -----METKHTEKDLKQAFY-VQTFLL 20  
AmelOr5 -----METKHTEKDLKQAFY-AQSFL 20  
AmelOr8 -----MVQIRNAREGINHTFWFAYPLS 22  
AmelOr9 -----MARIRNAREGINHTLWFAYPLS 22  
AmelOr11 -----MVQIRNAKEGLKHTFWFAYPFS 22  
AmelOr12 -----MARIRNAKDGIRHTFWFAYPFS 22  
AmelOr10 -----MVQIRNAKEGLRHTFWFAYPFS 22  
AmelOr14 -----MSRVGKAENGMRHTVWFAYPLL 22  
AmelOr15 -----MSRIGNAEDGMRHTIWFAYMLL 22  
AmelOr13 -----MGQPYSCLKLVYPLL 14  
AmelOr16 -----MENISGIAKAEEDLKYATRFVKPIL 25  
AmelOr17 -----MENISGIAKAEEDLKYATRFVKPIM 25  
AmelOr18 -----MNAEKLMI EGKPPNANYKNDLSFNVRNLNVWTL 32  
AmelOr19 -----MNMEHFIVEKKSYNASYKNDLFFNVQLNVWTL 32  
AmelOr22 -----MEKSKINS-ISCITQTNHDYKRVNLSIQWSRWIL 33  
AmelOr24 -----MSYTKTDHDYKRVNLSIQWSRWIL 25  
AmelOr20 -----MEKSKDKANQKFYLTDEYQKVNLSIQYNRWLL 34  
AmelOr25 -----MEK-----QQYVIAQDDGK-KANLSIQWNRWLL 27  
AmelOr29 -----MKN-----QQVVITQDDYKRKTNLSIQWNRWLL 28  
AmelOr30 -----MEK-----NRSIGHDDYERNVNSIRWNRFL 28  
AmelOr21 -----MSSVKIDQDYKSNVNSIKYSRRIS 25  
AmelOr23 -----MSSVKINQDIKNNINFSIKYSRLIL 25  
AmelOr35 -----MLVLKDSSSVSYSKDWIYSVQINRWLL 27  
AmelOr27 -----MMN-QTAITEEIKTNSDYSLQLNRWFL 26  
AmelOr28 -----MSNRSVAIKTDPDTNSDYCLQLNRWFL 27  
AmelOr33 -----MMTSKSVPIEQDNHSLSNYSVQLNRWFL 28  
AmelOr34 -----MMIDKFVPIEQDNHSLSNHSVQLNRWLL 28  
AmelOr32 -----MIDKFASIQQTNNLSNYSIQWNRWFL 27  
AmelOr31 -----MTSKSVISEESFDSLCDYSLQLNRWLL 27  
AmelOr36 -----MTDDISAIQKKFGSLNEYSIQVNRWLS 27  
AmelOr37 -----MMADDIATVQKEFENLNEYSIQFNKWF 28  
AmelOr38 -----MMADDIATVQKEFNLNNEYSIQFNKWF 28  
AmelOr39 -----MMADDIATVQKEFDNLNEYSIQFNKWF 28  
AmelOr47 -----MADDIVAIQKKFGSLNEYSIQWNRWLS 27  
AmelOr48 -----MADDIVAVQKKFGSLNEYSIQWNRWLS 27  
AmelOr40 -----MADDITAIQKKFGSLNEYSIQWNRWLS 27  
AmelOr43 -----MMADDIAAIQKKFGSLNEYSIQWNRWLS 28  
AmelOr45 -----MADDIAAIQKKFGSLNEYSIQWNRWLS 27  
AmelOr41 -----MADDIVAIQKKFGSLNEYSIQVNRWLS 27  
AmelOr42 -----MADDIVAIQKKFGSLNEYSIQVNRWLS 27  
AmelOr44 -----MADDIVAIQKKFGSLNEYSIQVNRWLS 27  
AmelOr46 -----MSDDLVEVEKKFGSLNEYSIQFNRWIL 27  
AmelOr49 -----MADDLAKIEKKFGDLSEYSIQFNRWIL 27  
AmelOr50 -----MTNDINVAKQRSDNLSEYSIKLSRWYL 27  
AmelOr26 -----MMNQLNEQSVLMPVSYARDYEYSIQVNRWLL 31  
AmelOr53 -----MHDRSHDNINGQLKNSHYKSDIHYTLQMCQWLL 33  
AmelOr54 -----MHDRSYHDIESQLKNSYKSDIHYTLQMCQWLL 33  
AmelOr52 -----MFDRSYN--NSQLKNIHYENDIHYTLQMCQWLL 31  
AmelOr51 -----MRSTNNIDNLPLNDRYESDIQYTFQFCHWIL 31  
AmelOr55 -----MHFSVRNLIN-KPRNPNEYKDITYVMKHNKWWL 32  
AmelOr57 -----MHVSVRDPIN-ELRNPNEYKDIAYVTKHNKWWL 32  
AmelOr56 -----MYLSIQNPIN-EPRNPNEYKDIAYVTKYNKWWL 32  
AmelOr58 -----MHLFVRDQTN-QPRNLNEYKDIVYVTKHNKWIL 32  
AmelOr59 -----MHPITLNE SDCKARNLKYKEDIAYVTKHNKWIL 33  
AmelOr60 -----MHLTILNESDYRARNLKYKEDIAYVTKHNSKWIL 33  
AmelOr61 -----MHLTTLNKNCKVRNLKYKEDIAYITKHNKWIL 33  
AmelOr63 -----MLKKMKTT'SNKDFAYAMT'PLKFLA 24  
AmelOr64 -----MKT'TSNKDFAYAMT'PLKFLS 20  
AmelOr66 -----MKT'TLNKEFAYAMT'PLKFLS 20  
AmelOr65 -----MKT'TSNKDFTYAMT'LLKFLS 20  
AmelOr67 -----MKT'TSNKDFTYAMI'PLKFLS 20  
AmelOr114 -----M 1  
AmelOr115 -----MDFAMGWNRFNL 12  
AmelOr118 -----MINRPLEYSL 10  
AmelOr164 -----MAIKSINRPEVIEISL 15

AmelOr163 -----MFKTIIITYPVEVCL 14  
AmelOr165 -----MLVLNNTLSPSVKFGFL 15  
AmelOr166 -----MTSINTISRVSVKYGL 15  
AmelOr167 -----MIPIRSISHPIVIGL 15  
DmelOr35a -----MVRYVPRFADGQKVKLAWPLAVFR- 24  
DmelOr74a -----MSFHRYRPRLPGGELAPMPWPVSLYRV 27  
AgamOr3 -----MPSERLRLITSFGTPQDKRTMVLPKLKDDETAVMPFLLQIQ 40  
AgamOr5 -----MVLPKLSEPYAVMPLLLRLQ 20  
AgamOr13 -----MNFLRQEQPAGMPHISIKLL 20  
AgamOr15 -----MNFLRQEQPAGMPHISIKLL 20  
AgamOr17 -----MNFLRQEHYPAGMPHISIKLL 20  
AgamOr16 -----MRFFLIEKPPGVPHIALKLL 20  
AgamOr55 -----MIRFFTIHKPPGVPHLALKLL 21  
AgamOr18 -----MTSFKPTDDTDVMPVLVRL 20  
AgamOr14 -----MLFQELPNDRAVLPLLLYIQ 20  
AgamOr51 -----MLFQALPNDRAVLPLLLYIQ 20  
AgamOr12 -----MEKLRPEDPKAVMPYAKRLL 20  
AgamOr19 -----MLRLSPEDPKAVMPVVKRLL 20  
AgamOr20 -----MLRLSPEDPKAVMPVVKRLL 20  
AgamOr21 -----MLRLSPEDPKAVMPFAKRLL 20  
AgamOr50 -----MLSLRPEDPKAVMPFAKRLL 20  
AgamOr29 -----MKLFQIDDPREVVPICRLL 20  
AgamOr53 -----MKLLELDNPRAIAIGCRLL 20  
AgamOr30 -----MKFFQIDDTREILPICRLL 20  
AgamOr46 -----MVVFEPLDDPLKVLPLPLKLL 21  
AgamOr47 -----MVVFDPLDDPLKVLPLPLKLL 21  
AgamOr48 -----MVN-----LFARTPADNFRVMPYNLRLF 23  
AgamOr49 -----MFRRLTHPTSPKQQHHRDRACDFTVMPHGLWLL 33  
AgamOr61 -----MWHHQVQL-WFRLLGRFTTFTDSSDYFGLYKTLA 34  
AgamOr62 -----MVRSQPFRLSLVRKYWDKYFTFTDVTVDYFNLLNTFG 36  
AgamOr63 -----MYLTQLFASMRTQFLHRIHTYTKHSDFIMQRYFE 35  
AgamOr60 -----MIDLVTRIRKLLALERKLANDLDQFVLLHHLT 33  
AgamOr75 -----MTVVHRIVSFGYNLLQRHFNVGHPTEQFFLLRCLD 35  
AgamOr76 -----MTVVHRIVSFGYNLLQRHFNVGHPTEQFFLLRCLD 35  
AgamOr78 -----MTVVHRIVSFGYNLLQRHFNVGHPTEQFFLLRCLD 35  
AgamOr77 -----MGTANQPTSICFLRWIGWMD 20  
AgamOr79 -----MGTANQPSSICFLRWIGWMD 20  
AmelOr99 -----MDIFQKIEKQHNEIYDIPY-YKMMEKYI 27  
AmelOr101 -----MDIFQKTKKQHNEIYDIPY-YKMMEKYI 27  
AmelOr102 -----MNIFQKTRRQCPDIFDIPY-YKMVEKYF 27  
AmelOr103 -----MDIFQKTERQYPEIFDIPY-YKMVEKYF 27  
AmelOr104 -----MDVFQKTRNKCINIFDIPY-YKLLLEKYM 27  
AmelOr98 -----MDMFQKTGKEYSNIFDIPY-YKVLKKYL 27  
AmelOr100 -----  
AmelOr97 -----  
AmelOr105 -----MSMLQKSNEQEYNAFDIAY-YKTLKLYL 27  
AmelOr109 -----MDERAIEDQY-LKINKFFG 18  
AmelOr110 -----MDKQTIENQY-LKINKFFG 18  
AmelOr111 -----MDKRVIDQY-LKINKFFG 18  
AmelOr108 -----MNKQAIEDQY-LRINKFFG 18  
AmelOr107 -----MDQQAMEELY-LKDNKFFG 18  
AmelOr112 -----MDARTVEKNF-LKVNKIFG 18  
AmelOr113 -----MDSDILEKRF-LKITKRFA 18  
AmelOr106 -----MDVR-LEERY-LKINKIYS 17  
AmelOr122 -----MNMDVFDKQ--YRIYRIIL 17  
AmelOr125 -----MNMDVFDKQ--YRIYRIIL 17  
AmelOr123 -----MNVFDNQ--YRTYRIIL 15  
AmelOr126 -----MNVFDNQ--YRTYRIIL 15  
AmelOr127 -----MNVFDNQ--YRTYRIIL 15  
AmelOr128 -----MNVFDNQ--YRTYRTVL 15  
AmelOr129 -----MNVFDNQ--YRTYRIIL 15  
AmelOr133 -----  
AmelOr134 -----MDIFDKH--YYSYRTVL 15  
AmelOr131 -----MDVFDKY--YHTYRIVL 15  
AmelOr132 -----MDVFDKY--YHSYRTVL 15  
AmelOr135 -----MDVFDKQ--YHSYRTVM 15  
AmelOr136 -----MNVFDKH--YHTYRTLM 15  
AmelOr138 -----  
AmelOr130 -----MNVFDNQ--YRIYRIIL 15  
AmelOr137 -----MDIFDKR--YCTYRTML 15

|           |                                                             |    |
|-----------|-------------------------------------------------------------|----|
| AmelOr139 | -----MDIFDKHQSYHSYRTIM                                      | 17 |
| BmorOr20  | -----MIFVDDAVIG-----IKDPREYRHLRVLRTSL                       | 27 |
| BmorOr3   | -----MIFVDDAVIG-----IKDPREYRHLRVLRTSL                       | 27 |
| BmorOr18  | -----MIFVDDAVIG-----IKDPREYRHLRVLRTSL                       | 27 |
| HvirOr6   | -----MNLRKFLFENEAVEG-----INSPADYLYTRILRFNL                  | 32 |
| BmorOr23  | -----MLLYYPNTQVK-----EKVNNVEEFTYIKFLKSFC                    | 30 |
| BmorOr16  | -----MLLYYPNTQVK-----EKVNNVEEFTYIKFLKSFC                    | 30 |
| BmorOr4   | -----MLLYYPNTQVK-----EKVNNVEEFTYMKFLKSFC                    | 30 |
| BmorOr5   | -----MLLYHPNTQVE-----EKVNNVEEFTYMKFLKSFC                    | 30 |
| BmorOr22  | -----MFKI IKNI I VENDALKQVEKPEFQYMKWVQYHL                   | 34 |
| BmorOr17  | -----MFKI IKNI I VENDALKQVEKPEFQYMKWVQYHL                   | 34 |
| BmorOr1   | -----MLLSFKDDRSR-----PDIQKPQNFQYMKILRFNL                    | 30 |
| BmorOr1a  | -----MLLSFKDDRSR-----PDIQKPQNFQYMKILRFNL                    | 30 |
| BmorOr1b  | -----MLLSFKDDRSR-----PDIQKPQNFQYMKILRFNL                    | 30 |
| BmorOr19  | -----MKEEYYLQHPRT-----QLFYKVLAVHSTIESTI                     | 29 |
| BmorOr15  | -----MKEEYYLQHPRT-----QLFYKVLAVHSTIESTI                     | 29 |
| TcasOr5   | -----MVWSPKDVYDLTLPILPAWKY                                  | 21 |
| TcasOr7   | -----MYRLVASFVNVMGAESAQQV                                   | 20 |
| HvirOr4   | -----MCVYSYILVTVL                                           | 12 |
| BmorOr13  | MTMSIKPRLQCMVPPSLALALRVSRLAGIAPLKFVAKQSNIMIRLSTSLCVSYLLVTAL | 60 |
| DmelOr10a | -----MSEWLRFLKRDQQLDVYFFAVPRLSL                             | 26 |
| DmelOr33c | -----MVIDSLSFYRPFV                                          | 14 |
| DmelOr7a  | -----MAVSTRVATKQEVPESTRRAFRLNFCNFY                          | 28 |
| DmelOr22c | -----MTDSGQPAIADHFYRIPRISG                                  | 21 |
| AgamOr1   | -----MKLNLNPRWDAYDRRDSFWLQLLCL                              | 26 |
| AgamOr4   | -----MKFELFQKYSSPDTVLSFVLRLL                                | 23 |
| DmelOr47b | -----MNDSGYQSNLSLLRVFLDEFRSVLRQESGLIPRLA                    | 36 |
| AmelOr73  | -----MHKLSLSFALL                                            | 11 |
| AgamOr68  | -----MYTAIEFYNASFNRLKLS                                     | 19 |
| DmelOr59a | -----MAEVRVDSLEFFKLSHW                                      | 16 |
| DmelOr23a | -----MKLSETLKIDYFRVQLNAW                                    | 19 |
| AgamOr31  | -----MLAAETVDFFRVQSICL                                      | 17 |
| DmelOr2a  | -----MEKQEDFKLNTHSAVYYHW                                    | 19 |
| AmelOr62  | -----MGKRKESIDERIRNFMVQKMVL                                 | 22 |
| AmelOr121 | -----MHTSESKKYSKDYEWAVRLNRFSL                               | 24 |
| AmelOr140 | -----LRGLYSVWGVNYDAVIECMP                                   | 20 |
| TcasOr12  | -----MAHNLDVDLTFVRFNI                                       | 17 |
| AgamOr8   | -----MDPPTDELVRFESFIRVPEIFF                                 | 22 |
| BmorOr9   | -----MDIPKFEELLKQIKMNF                                      | 17 |
| AgamOr40  | -----MLRPTSEDDQTLINFRLLERVL                                 | 23 |
| TcasOr63  | -----MGFMIQDYDLRNASLRLKLM                                   | 21 |
| TcasOr4   | -----MDEEFLIGTFETEKKFL                                      | 17 |
| TcasOr13  | -----MSAMSTVIVSGEMFDLFSFVLYLS                               | 24 |
| AgamOr24  | -----MDLTAGIESFN                                            | 11 |
| AgamOr54  | -----MYYLEQLRALVRRYLERRSPDPRIQHTFIVQSIN                     | 34 |
| AgamOr23  | -----MRWRKDETLHTPQCTV                                       | 17 |
| AgamOr64  | -----MFHPSRWMAKCRVWYAAATFKFSADADYFFLVQPLC                   | 35 |
| DmelOr82a | -----MGRLFQLQEYCL                                           | 12 |
| AmelOr116 | -----MTNHLEKQIKLKKINSNKHQLQNNLSII                           | 27 |
| AmelOr160 | -----MRRPISSYVELFYDKNVISWSKRL                               | 25 |
| TcasOr10  | -----MATFLLYKTEMLDLIK                                       | 16 |
| TcasOr26  | -----MMESTVTRL                                              | 9  |
| AmelOr117 | -----MKKPFNKSIDYYILPNKIFC                                   | 20 |
| AmelOr120 | -----MSNQNTMNIIRNYIFINQLVL                                  | 21 |
| BmorOr7   | -----MSLSGSSVFRHLFLL                                        | 15 |
| AgamOr6   | -----MVRLSFEETLRNTNML                                       | 17 |
| DmelOr45a | -----MDASYFAVQRRAL                                          | 13 |
| DmelOr67d | -----MLKMAKVEPVERYCKVIRMIR                                  | 21 |
| DmelOr83c | -----MSTSESPSSRFRELSKYIN                                    | 19 |
| AmelOr162 | -----MKRLMDIMQEDWKFHARLR                                    | 19 |
| HvirOr3   | -----                                                       |    |
| TcasOr20  | -----MMDETYLQFFVKSF                                         | 14 |
| AgamOr11  | -----MELKEEWILPDVVYANPLKRTLLGL                              | 26 |
| DmelOr56a | -----MFKVKDLLSPTTFEDPIFGTHLRYF                              | 26 |
| AgamOr28  | -----MARLVLHEVRYVLMAMLYISRGMATKIQNSPI                       | 32 |
| AgamOr58  | -----MSALVHLAKDHIQRIADGGQFVIVNGMD                           | 28 |
| AgamOr59  | -----MFSASAEMEWFRQQRHAI CHLREGSD                            | 26 |
| DmelOr1a  | -----MSKLEIVFLGNLWTQRFTF                                    | 19 |
| DmelOr13a | -----MFYSYPYKALSFPICQVWL                                    | 19 |
| AmelOr161 | -----MGEFRNEEYDQLIKPIMITG                                   | 20 |

AmelOr141 -----MIDEKTKREFDKTIDLNLFL 21  
 AgamOr52 -----SLTPTDAGVQLQTERL 16  
 AgamOr36 -----MQTGGVLSRMRRALGRFYVERDFFRPYEILL 31  
 AgamOr25 -----MEQEINQIISFLRRPL 16  
 AgamOr45 -----MPRATSNSAANLRLVI 17  
 TcasOr3 -----MSKSEKIHTLATYFDSNIAFL 21  
 DmelOr88a -----MKPTEIKKPYRMEEFRLPQMFQEVA 25  
 AgamOr22 -----MFSLGKSHQYLELSYNRI 18  
 DmelOr49a -----MEKLRSYEDFIFMANMMF 18  
 DmelOr85f -----MEPVQYSYEDFARLPPTTVF 19  
 AmelOr119 -----MHTQRDTSEITYSHDTATSRKLFYLL 26  
 DmelOr63a -----MYSPEEAAELKRRNYRSIREMIRLS 25  
 DmelOr67b -----MQDQLDHLELERIDKLPKLGLLW 22  
 BmorOr21 -----MSNYVFKPFHETRYRIITFTM 20  
 BmorOr11 -----MSVSNLKFEALFKPTTMSL 19  
 BmorOr12 -----MHEFVINVQNETTKLYDQLNII LYIL 26  
 AgamOr33 -----MCILAGLLTLAKKWHCVL 19  
 HvirOr1 -----MGPTSLKRNMFVWIPVKKN 19  
 HvirOr5 -----MSGHRSVTARLAGTIF 16  
 TcasOr1 -----MNNSRPANCTHRPKLS 16  
 TcasOr2 -----MFKTVTREKVFQKFTSSIRMLLIQ 25

TcasOr16 HFMLNYHADNSGALHTLRL--GYCCMHLVFLVQYGCNFVNLVL-----ERGDVNDLAA 76  
 AmelOr2 HFMFNYITDSS-TKHIHKI---YCIVHLVLILMQFGFCGINLMM-----ESEDVDDLTA 74  
 AgamOr7 HFLFRYVTGPI---LIRK--VYSWWTLAMVLIQFFAILGNLAT-----NADDVNELTA 74  
 AaegOr7 HFLFRYVNGPV---LIRK--LYSWWNLIMILLQYFAIMGNLVM-----NTGDVNELTA 59  
 DmelOr83b LFMHNFVTGSSA---FMKK--VYSSVHLVFLMQFTFILVNMA-----NAEEVNELSG 76  
 BmorOr2 HFLFNYHADTSGMNMLLRK--IYSSAHAVLIVVHYICMGINMAQ-----YKDEVNELTA 77  
 BmorOr2a HFLFNYHADTSGMNMLLRK--IYSSAHAVLIVVHYICMGINMAQ-----YKDEVNELTA 77  
 HvirOr2 HFLFNYHSEENAGMSNLLRK--IYASTHAILFIHYACMGINMAK-----YSDEVNELTA 77  
 AgamOr56 --FWNDSPGQR-----IPS--LGLLVTAIYPLIWLIPSWLFLVS-----SQDNITRFMK 69  
 AgamOr57 --FWNDSPGQR-----IPS--FGLLVTAIYPLIWLIPSWLFLVS-----SQDNITRFMK 69  
 AgamOr26 --LWNESSQR-----MST--FGVLLIAVFPIMWLIIPSWLFIVS-----SQDNIKRLMK 69  
 AgamOr27 --FWSKTTGQR-----ISV--IGLLAVILYLLAWLIPNWLFIVS-----SQDNITRLIK 69  
 HvirOr9 HLESKDTTKTFIERSRSRHR--LYFAHFFSLNLEVVQAQILWVLEA---VITRKSFVEITR 75  
 HvirOr7 -MNIKNKIVTPLDTIKYRW--LYTLNFLVVFSAIIGSVYYVILG---IKQGNFIEVTS 53  
 DmelOr85b IRPYTNGEESKMKNLIFHI--VFWSNVINLSFVGLFESIYVYSA---FMDN-KFLEAVT 69  
 DmelOr85c IEPYTIIDSRKASLWVSHL--LFWANVINLSVIVFGEILYLVA---YSDG-KFIDAVT 68  
 DmelOr85d MMAYDHKYSQKWEVLLHW--TFIAQMVNLTNVLISELIYVFLA---IGKGSNFLEATM 90  
 DmelOr67a IDPYETG--RKRTIWFQI--YFALNMFNMVFSFYAEVATLVDR---LRDNENFLESCI 81  
 DmelOr67c EDIYAHIRSTNPKSLLFKI--YLYAGFINFNLLVIGELVFFYNS---IQDFETIRLAI 81  
 DmelOr92a EDLYSDRDPNVIIRYLLRF--YLVGLFNLFNAYVVGIEIAYFIVH---IMSTTTLEATA 86  
 DmelOr69a YQWKGRPTERQFYASEQRI--VFLGTCIQIFQITGVLIYWYCNGLRATETGTFVAQLSE 79  
 DmelOr69b YTWNGRRSLEVKNLAKRI--IFWLGAVNLVYHNI GCVMYGYFGDGRTKDPIAYLAELAS 79  
 TcasOr6 -----MSPHD--SGTFARIRKIFSILVYTSTVVL SMAELFFNYKDLETVIR 44  
 TcasOr11 VKFTEPLEFLNVVGLNPEN--CSNFSLFRRVISLGFVFLVITLGLLELLHFEGLTCSR 61  
 AgamOr41 RLIKRQRLLLKLGIDSYD--PAFRIHSLTFMLVCLALTFVVISLYDLYFRDDLFNFVY 68  
 AgamOr42 AMVAWQNRVLAALFGCYMYL--GKERVSYRIVPICFMACSFVLLSLSYSAVQARGNMGOAVL 73  
 AgamOr43 YNLHLIRWFASFVGLDIMA--PNYKPNILTFLAFFGLSISLIGEVYTVWYFVWVPLDKLME 69  
 AgamOr44 YNLHLIRWFASFVGLDIMA--PNYKPNILTFLAFFGLSISLIGEVYTVWYFVWVPLDKLME 69  
 AgamOr66 QFERYIRTLNCNIGFDVMT--ETWKKSRYTYMSIFLCSQYLILMVYSLIIAS--DTFELFK 65  
 AgamOr67 QFERYLRTLCKIIGFDVMT--ETWKKSRYTYMSIFLCSQYLILMVYSLIIAS--DTFELFK 65  
 AgamOr72 KLMKSLIVYSKVAGVEIWT--APGKFPASYVVSFHITVYFVSTVWTLRKYIDDP IHMMK 66  
 AgamOr73 KLMKSLIVYSKVAGVEMWT--APGKLPASYVVSFHITVYFVSTVWTLRKYIDDP IHMMK 66  
 AgamOr71 KLMKSLIVYSKVAGVELWT--APGKFTPASVVSFHITVYFASTVWTLRKYIDDP IIRMMK 66  
 AgamOr74 KLMKSLIVYSKVAGVEIWT--APGKFTPASVVSFHITVYFASTVWTLRKYIDDP IHTMK 66  
 AgamOr70 KLLKYLIVYSKVPVEMWT--APGKFKPASVVSFHIIVYFVSTVWTLKKSDDP IHMMK 66  
 AgamOr69 QLLQPLIFYSKGVGVEIWT--APGKFPASYVLSLHVAIYFSSTVFTLIKYSDDTLHMMK 66  
 TcasOr9 -----  
 TcasOr18 YLTGATFTLCAVLYPIDS--NPKIKKILYAVWAI-----FFILTFVTGFIQCFVFCVI 58  
 DmelOr83a YVYNGS-GVLAVLVRFCDL--TYELFNYSVSVHIAG-----LYICTIYINYGGDLDFV 88  
 DmelOr85e RLPKWWPKRLEMIGKVLPK--AYCSMVIFTSLHLGV-----LFTKTTLDVLTGELQAIT 98  
 TcasOr24 FFLKWSFMWPTKSEEFRTS--KGLYFRLAFVVIISGLTFTAMIVMHLKKSVEAGDYDISE 72  
 TcasOr25 YYLKLSLMWPLKREEFKSS--KGLYLRLLVFVVIISGSTFTAMIFMHLKSLKVGSDYDISE 72  
 TcasOr19 DFGRFRHHPHRSAGFDAP-----LEAMEEG-MDISE 37  
 TcasOr22 EIMKYLQLWPQNEHTNLRR--RFCFVILLCSPLTLG-----LAAHLIVCIKDNLDVELSA 66  
 TcasOr23 EVMKYLQLWPQNEHTNLRR--RYFIVIFLCSPLHLG-----LATHLVVCLKDNLDVDLSA 66  
 AmelOr168 NVVSGNFLPMTNINEKSSV--ISKIYFVIVWIIQLM-----YLASCTLGLFNVSWERALK 66  
 AmelOr170 NMVSGNFLPMTNINEKLSL--ILKIYFVVAWIIELI-----YVAASFGLGFNVSGEKALK 66

AmelOr169 NAVSGNILPITDMKKRLSI--VLKIYSILVWTIELS-----YLAACILGLFNVSRRERALK 68  
 DmelOr65b KAMALFTTTE-----ER--LLPYRSKWHTLVYIQMVIFFASMSFGLTESMGDHWQMG 66  
 DmelOr65c KAMFLYTTTSK-----ER--QMPYRSKWHTLVYIQATVCFGLTMCYGVTEISLGDVQMG 66  
 DmelOr65a KALGFYMNSE-----QR--RLPRIVAWQYFVSIQLATALASLFGYISESGDKIVNLGR 97  
 TcasOr17 KILGLWPKG-----DETYK--LNFYTLAYVFGVIGLLCAHSFVQIFNIYFIVDDLEAFTS 70  
 TcasOr21 KIVGLWPD-----SEDYK--FDFYALHASVWLSTLLVASTFFQGINIIFILDDVKALTG 69  
 TcasOr56 QILGIDILP-----VESVP--QNLFYTYTALIIIS-TMCLFTIAEFLDMVLNYEDIYRLTF 74  
 TcasOr15 QILGIDILP-----NERIP--QTLFYTYSVLLIA-TMVVFTTAECLDLVLNYEDIYKLT 72  
 AgamOr9 RMFYAWPDEH-----LEKS--ALWYRAKGVLFVFFIYLSAATQLAYNFTVTSREELFA 89  
 AgamOr65 RMFYAWPDEQS----LAPN--ALWYRAKGVLFVFFIYLSAQAQLAYNFTVTSREELFA 92  
 BmorOr6 GVWPVEKTSLF----SVIY--RSIMLSSQFCFLVFNGIYIGLWVG-----DLKAVSD 67  
 BmorOr10 AMWRSFEKPIP----LKVY--MAFIMTTQYLF LIFEIIYIVNVWG-----DMAEVSE 66  
 AgamOr34 KVCGFFNAP-----VPK--SVAYRVYCYAFYSCIMAVYLFVLLLNVPVQPFEQRVFF 69  
 AgamOr37 KICGLYNG-----KPQ--TTRYRVYRAVFNIFLMVVYLFVLSLNVFVMQTFEQVLVLY 81  
 DmelOr94a QLFGLWPWSLKSEEWTF--GFVKRNYRFLHLPLITFTFIFGLMWLEAFISSNLEQAG-Q 75  
 DmelOr94b RWIGLLKWENEGED--GVL--TWLKRIYPPVHLPLTFTYIALMWYEAITSSDFEAG-Q 72  
 DmelOr71a KWRRLWPR----KESVSTP--DWTN-WQAYALHVPFTFLFVLLLWLEAIKSRDIQHTA-D 68  
 DmelOr46a SLWQPQIERR-----WRI--IHQVNYVHVIVFVWLLFDLLLV--HVMANLSYMSEVVK 68  
 DmelOr46b GVWQLPTWA-----ADH--QRRFQSMRFGF ILVILFIMLLLSFEMLNNSQVREILK 68  
 HvirOr8 KFLAIWPGK-----DF--TRRYKYTVAFLTAYFIIIFMILFTINLFFLPKQLDIFIE 66  
 BmorOr8 KMFGIWADR-----KS--SKTYKYYSFVFLFITLIMYNSLLAINLLYTPKIEILLIR 68  
 AmelOr68 TICGCRMPSS----CRTSY--KRMLYILYATFVLLLLYSFCISQFLNVIINVRTADELCN 65  
 AmelOr69 TSCACWRPP----FLSPY--KNFAYTYVYCYVILLIYGATFCQFVLLLIIVETEDEFCD 64  
 AmelOr70 SVCGCMPPTS----WKSSF--KKSLYNIYTCVIWLLILSLVSTQILDIIINVKNKNEFIE 65  
 AmelOr71 ALCGCFPPSS----WTRL--KRYLYKIYAVFSFVALNSFLLSQILDMVYNVKGTDDFSD 65  
 AmelOr72 VATGYFLSPK----IKSPR--KRFLYNVYTVVVTFLFLLSFLTLIMQIVFNVRTADELSE 65  
 DmelOr19a RIFRIMGIHPPGKRTFWGR--HYTAYSMVWNVTFHICIWVSFSVN---LLQSNLETFC 71  
 DmelOr19b RIFRIMGIHPPGKRTFWGR--HYTAYSMVWNVTFHICIWVSFSVN---LLQSNLETFC 71  
 DmelOr33a LYWRLLGVEG---DYPFR--RLVDFITITSFIT--ILFPVHLILG---MYKKPQI-QVFR 65  
 DmelOr33b LYWHLLGLES---NFFLN--RLDLVTITFVT--IWYPIHLILG---LFMERSLQDVCK 67  
 DmelOr22a RVMWSFGW-TEPENKRWIL--PYKLWLA FVNIVMLLILPISISIEYLHRFKTFSAGEFLS 85  
 DmelOr22b RVMWSFGW-TVPENKRWDL--HYKLWSTFVTLIFILLPISVSVEYIQRFKTFSAGEFLS 85  
 DmelOr42b RAMKFIGW-LPPKQGVLR--VYLTWTLMTFVWCTTYLPLGLFGLSYMTQIKSFSPEFLT 82  
 DmelOr59b RAMWLIW-LPPKEGVLRY--VYLFWTCVPAFAGVYFVLPVGFIIISYVQEFKNTFPGEFLT 83  
 DmelOr59c RIAFFLW-LTPPKGALLRW--IYSLWTLTMMWLGIVYLPGLSLTYVKHDFRFTPEFLT 85  
 DmelOr98a YGMFCMGW-HTP--ATHKI--IYYITSCLIFAWCAVYLPIGIISFKTDINTFTPNELLT 80  
 DmelOr42a RCVFLMGV-RKPP-AKFFV--AYVLWSFALNFCSTFYQPIGFLTGYISHLSEFSPEFLT 85  
 DmelOr85a RSIDQMGWRLLPRTKPYW--LYYIWTLVIVLVFIFIPYGLIMTGIKEFKNTTTDLFT 83  
 DmelOr43b ETLRNSGL---NLKNDFGI--GRKIWRVFSFTYNMVILPVSFPINVIHLAEFPPELLLQ 82  
 AgamOr2 RVWLFWSYLRRP-----RLSRFLVGCIPVAVLNVPFQLKLYSSWGDMSIELII 60  
 AgamOr10 RVWRFWSFVLVH-----NWRRYIS--IIPVTALNVFMFADLYRAWGNIEEVI 59  
 DmelOr30a KLMKFWSYLFVH-----NWRRYVA-MTPYIIINCTQYVDIYLSTESLDFIIR 64  
 DmelOr49b KILRFWALLYDK-----NLRRYVC--IGLASFHIFTQIVYMMSTNEGLTG IIR 58  
 DmelOr43a RMWRHLAVLYPTPG-----SSWRKFAFVLPVTAMNMQFVYLLRMWGDLPF IIL 62  
 AgamOr32 RLIRFCGVVEQPSLKNN-----VRCLFAFILLCSFGPL--HVWYLAKTPVLDLVVTC 63  
 AgamOr35 WYLRVYCVFREKSALGG-----IRLSVCLGVLVVFVVL--QSIYIFQH-VHHFAMICD 62  
 DmelOr47a ALLGFDLFSENREMWR-----PYRAMN-VFSIAAIFP--FILA AVLHNWKNVLLAD 62  
 DmelOr98b RLLGLELLHEQDVGHRY-----PWRISICILSVASFMP--LTIAFGLQNVQVQQLTD 65  
 DmelOr9a RCMGIDLWSP-TMANDR-----PWLTFVMTGPFVFLFMV--PMFLAAHEYITQVSLSD 74  
 AgamOr38 LIFGCVPPDRLTRRWYV-----KVLIAVNLITLAIICIVGEFRYCLYAIRNGSLIETIE 82  
 AgamOr39 LIFGVVPADRLVRPWYV-----KVLIAINLATLAIICMVGFLHGLYAYQEGDLSIESIE 83  
 DmelOr24a SLIGFYPEQ--KRTVLV-----KLWSFFNFFILTYGCYAEAYYGIHYIPIN-IATALD 63  
 DmelOr45b GLLGLRFGK--EQSWLH-----LLWLVFNFVNLAHCCQAEFVFGWSHLRTS-PVDAMD 74  
 AmelOr74 KSAGIWWIGNDAEERQ-----RKFAVFTLAALIYGIYVNAVDIYHNLNLAHCVF 69  
 AmelOr86 KLTGVWMTVNDGEKRR-----RRIAMAYTFVIQVYGLYLNIGDIYHSWDDLSHCIF 69  
 AmelOr75 KIVGLWLATDRNEQRQ-----RDFALIYTVGTLFISICIAFRDIYYSWGNFSNSVF 69  
 AmelOr84 KIVGLWLAADRDEQR-----RDFALIYTVGALFIVCIGFRDIYFTWGNFSDSVY 67  
 AmelOr87 KIVGLWLAKNEQEQRK-----RRLTLMYTVIAILFGVWVQFRDFYYSWPNFGNCA 84  
 AmelOr76 KIAGFWTSTNYVEERR-----RNVTMSYTLFAILFAATTEARDLYFSWGNFSDSIY 69  
 AmelOr85 KIVGFWIASNYVEERR-----RNLTISYTFFAIFFAMATEARDLYFSWGNFGDSIL 70  
 AmelOr88 KVAGFWVANNAEKRR-----RNVAMFVTIFFAFMGISIEGRDLYFAWGDFFEDSIF 69  
 AmelOr91 KLVGLWMAADQYEORL-----RNISVTYNLVAIFLALYLTQTTDIYYSWGNFSACL 68  
 AmelOr92 KFVGIWMX--QYQRM-----RNIMVAYNVIAIFFALWIQTMDMYHSWGNIRACL 66  
 AmelOr95 KLMGIWMANDQSEKYV-----RNVITILYSIIALLFGLWLQITDMYYSWGDFFSECF 66  
 AmelOr93 KLVGIWMAGNGZEX-----ITLFTAIFSGYNLZ-----MYFILGDFSACLF 55  
 AmelOr77 KLVGLWTAKNRREQRA-----RKFALIYTVAAAMLFWLIEFTDFYYSFGDFSTCLF 70  
 AmelOr94 RVVGFWLASSRLEEF-----GNATVMYSIITIFSMWVQMRGLYFSWGDFFVCTF 69  
 AmelOr96 RVVGFWLTTSRLEEF-----RIGVVGYTILAITFSAWVQIRGLYFNWGDFFSACTY 69  
 AmelOr79 KNVGVWMSHDPGEQR-----MRMLLVCTVWMLLLGIVINTRDLYFTMLYNGDILY 69  
 AmelOr83 KNVGVWMPDNDSEQR-----MKMLFLYTIWMLFCGTIISTRDLYFTMLYNGDILY 69



AmelOr80 KNVGIWMSDNPNEQRR-----IKMLFLYTIWNLLFGTVVNSRDLYFTLLYDGDILY 69  
 AmelOr81 KNVGVWISDNPSEQRW-----RNMLLGYTTWILLSGIINGRDLYFTLLYNGDILY 69  
 AmelOr82 KNVGVWMSDNPNEQRQ-----IKMLLINTWILLSGIVINGRDLYFTLLYHGDILY 69  
 AmelOr78 RNIGLWMSDDPGEQRR-----MRILLVYTVWILLLGMINGRDLYFTLLYNGDILY 69  
 AmelOr89 KNVGLWASNDPGHERR-----RKVILVYTMWCVTLSVVIIRDVYFTWFYNGDILY 69  
 AmelOr90 RSIGLWIGDGTNERR-----RKGMLAYTIWCTFFSTIISRDLFTWYNGDILY 67  
 AmelOr142 ALTCSWPPSPLATKAQ-----HLFFNALWCIAFLTSMVLFPLLLAAIYVYRKHPIVI 69  
 AmelOr146 SLSCCWPLPSTATKLQ-----TRCFKIIRSLFLNLSLLFFPLLYFVYVNRNDNTT 69  
 AmelOr148 ALSLCWPLPASSTRKQ-----IVCIKILQIGAIISAFMVLLPLIYAIHLNIHNLIN 69  
 AmelOr158 ALSFCWPLHINSTRKQ-----IMYIKILQISAVVNAFMVLLPLIYTIHLNMHNLIN 69  
 AmelOr147 ALSLCWPLPINSTRKQ-----IVCMKILQIGAIISAFMILLPLIYTIYLNLDNLNI 69  
 AmelOr150 AITFCWPLPANSTKIQ-----VFMFKTLQIISIINAFILLPLLYSVYLHFDDIVI 69  
 AmelOr151 ALTLCWPLPANNGKIQ-----VFMFKALQIISIINAFILLPLLYSVYLHFDDVII 69  
 AmelOr152 AITFCWPLISLNSSKTQ-----VFIFKILQIISIINVMFLLPLLYSVYLHFNDIII 69  
 AmelOr154 AICCCWPRPFNSTKNQ-----IFAFKVLQISTIISAFMVFLPLLYSIYHLNDNIIH 69  
 AmelOr155 AICFCWPPYPLNSSRNQ-----IFGFKVLQISTMVSACIMLLPLLYSIYHLNDDVII 69  
 AmelOr157 AMTFCWPLPPDTARKR-----IVGMKVLIIISIVNGCAVILPMLYIHLHLDDIIS 68  
 AmelOr156 ALFCFCWVPSANTSRNQ-----IIVFRFFQIFTIISCLGSLPMFHSIYHLDDIIV 69  
 AmelOr153 AL--CWPLSVNSGKTQ-----VFIFKMLQIISIVSACMLLLSSYSIYFX-HGQCR 66  
 AmelOr144 TFFTCTWPINPKDSKKY-----IIIRNILWFTTILNVIPLTISLMLAIFHFRSNIPK 70  
 AmelOr145 TFTCAWPINPNSDKTY-----IIIRNILWIFTILNVIPLAISMIFAIFHFRSDIPK 70  
 AmelOr143 TFFTCTWPINPNISKRR-----IIFRNIFWIFSILNVILLMTSLMLAVVYFRNDILM 65  
 AmelOr1 TLIGIWRPRNTFID-----NVKFYVQIGIVFFLMCFLLPHVIYTYFDCE-NLTKYMK 79  
 AmelOr3 TMVGIWRPRNTFSN-----NVKFYVQTTIVFFLMCFLLPHVIYTYFDCE-NLTKYMK 84  
 AmelOr6 KIIGAWPILIESSL-SS----KIQKWFIIISFISLQMCIVVPCILVMFLKEK-NGRRKIN 72  
 AmelOr7 KIIGAWPIVIESSL-SS----KIRKWFIIISFISLQMCIVVPCILVMFLKEK-NGRRKIN 72  
 AmelOr4 KIIGAWPIAIESSL-GS----KIQKWFIIISFYFLQICIVAPCILLDVFLKEK-NGSRRIN 74  
 AmelOr5 KIVGVWPIPIGSPL-SS----KIRNWFITFFSLFLQICIVGPCILVMFLKEK-NGKRKIN 74  
 AmelOr8 RMLGYWPLNVPSSA-FS----KILNSFTIFFSYLLPLIVLIPGLLYVFLKEK-NGRRKVK 76  
 AmelOr9 KMGVCWPLNIPSSA-FS----KIFNAFIIIFISYLLSLIVLVPGLLYFLKEK-NGRRKIK 76  
 AmelOr11 RTLGYWPL-VSPSA-FT----KFFNSFTIFTLYFLELIVLIPGLLYV-LQVK-NPRTKIK 74  
 AmelOr12 RMLGYWPLSVSSA-FA----KISNYFIIIFLSYLLTLIFMVPGLLYIFLKVK-NGRSRIK 76  
 AmelOr10 RMLGHWPLSVSSA-FS----KILNSFIIIFISYLLQMIIVVIPSLLYVILKEK-NPKKKIK 76  
 AmelOr14 RILGAWPNRVSSA-LS----KIFNWYLIFTCYTLQILIVLVPGLHVFLEKEK-NGRKKMK 76  
 AmelOr15 GKLGAWPNRATSSSFS----RTRNCILIFMCSYVQLIILIPGLLHFFLEKEK-DSRKKVK 77  
 AmelOr13 KILGAWP-KSSPSSVLS----TILKCLISICYLIQMLVLPGLIYIFLKEA-NLGGKIK 68  
 AmelOr16 ATIGAWPISSTSF-FL----KALQRLGHIFTYFLFFLIMIPTLAYVFLKEK-NSKVRLK 79  
 AmelOr17 GMIGAWPISSTSF-LL----KVLQRLRHIFTYFLFFLIMIPTLMYVFLKEK-NNKVRLK 79  
 AmelOr18 RTIGTWPRSPDHSWLE----TLEHVCLNLCYELLAFILIPCSIYIILEIK-DFYNQLK 86  
 AmelOr19 RTIGTWPKSLDRSWLE----TIEHVCLCFLNYVLLAFILIPGVMYFLEEMK-DFYDQMK 86  
 AmelOr22 KPIGLWPNSSSTISTTG----KYLYRLINVICYSLISFLSIPCSLYVILEVE-DIYNRIK 87  
 AmelOr24 KPIGLWPNSSSTISTTG----KYLYRLINVICYSLISFLSIPCSLYVILEVE-DIYNRIK 79  
 AmelOr20 KPMGLWPNSS---YTSK----DYPYWLINVICYCLISFLFIPCTLYLFLVEIK-DFYKGLK 85  
 AmelOr25 TPIGAWPNLRK-SRIG----KCYSLIISICYGLIGFMLVSCSIFLMVEIK-NIYNRIK 80  
 AmelOr29 TPIGAWPNLRK-SRIG----KCYSLIISICYGLIGFMLVSCSIFLMVEIN-NIYNKIK 81  
 AmelOr30 KSLGTWPNLRE-SRIG----KCYSVLIGIVCYGLISFMLTSSNMFLVVEVK-DTYNRIK 81  
 AmelOr21 KMIGLWPIFDKISTIH----KFLRMLYNTICYCLLMFMIVLGMWYIAFEVK-NIYDGLK 79  
 AmelOr23 KMIGLWPIFDKSSSTIH----KYLQWLYNVICYSLIMFIIISGWYISLEVE-NIYDRK 79  
 AmelOr35 KAIGIWPLSLCVTTTE----KIHVSILTILSIFLIGFLLVPCITLCTLLDKTGDLDTKIK 82  
 AmelOr27 KPIGAWPLFSTTKFE----KTVSILNIIICYAIVILCATPSLMQIILAE-SFYLKMK 80  
 AmelOr28 KPIGAWPSPSTTKHE----RIISFLLNVSCYSSLLFTLIPCLLHMLLEDE-SFYLKMK 81  
 AmelOr33 KSIGTWPLSPSTTKLE----KTISFLLIICCYCFICFTVIPCLLHIIIGDD-SFREKMK 82  
 AmelOr34 KSIGAWPSPSTTKLE----KIISFVLIICCYCFICFTVIPCLLHVILEDD-SFHEKMK 82  
 AmelOr32 KPIGAWPSPSTTKLE----KIISIVLIICCYSSICFTVIPCLLHVMLEDE-SFRDKMK 81  
 AmelOr31 KPIGAWPSSSSSKLE----RIVSFFLIVLCYGFILFTVIPSLFHIVLEDE-NLHMMLK 81  
 AmelOr36 KTIGVWPLPSSTSKFE----KITRILILFCWIIAVLDTTSGLLHFLVLEVE-DIISKMK 81  
 AmelOr37 KTIGVWPLPSSTSKFE----KIMTRILILFCWIIALFDAISGLLHFLVLEVE-DIISKMK 82  
 AmelOr38 KTIGVWPLPSSTSKFE----KIVTRILIIVCSIIITLTVIIPSLMHFILVKE-DIISKMK 82  
 AmelOr39 KTIGVWPLPSSTSKLE----KIMTRILILFCWIIITLTVIIPSLMHFILVKE-DIISKMK 82  
 AmelOr47 KTIGVWPLPSSSSKLE----KIITKILIFLYWIIIVLFIITSLHFLVLEVE-DIVSKMK 81  
 AmelOr48 KMIGVWPLPSSTSKFE----KIMTKILIFFYWIIILLFIILASSLHFLVLEVE-DIVSKMK 81  
 AmelOr40 KTIGVWPLPSSTTKFE----KIMTKILIFLCWIIALFVITSSLLHFTLVKE-DIISKMK 81  
 AmelOr43 KTIGVWPLPSSTSKLE----KIMTKILIFLCWIIALFVIISSLLYFALVKE-DIISKMK 82  
 AmelOr45 KTIGVWPLSSSSSKFE----KIMTKILIFLCCIIALFVIIIPSLHFTLVKE-DIISKMK 81  
 AmelOr41 KTIGVWPFSTSTSKFE----KIMTKILIIVCSIIALFVTIPSLMHFILVKE-DIITKMK 81  
 AmelOr42 KTIGVWPFSTSTSKFE----KIMTKILIIVCSIIALFVTIPSLMHFILVKE-DIITKMK 81  
 AmelOr44 KTIGLWPLTSTSTSKFE----KIMTKILILLCWIIALFVTTLSSLLHFLVLEVE-DIITKMK 81  
 AmelOr46 KPIGAWPISLCTTRNE----KIISKILIIVCWSLSLFTLIPGLLHFILEKE-DTYLKK 81  
 AmelOr49 KPIGAWPASFYKSRIE----KIVSKILIVICWISSLFTLIPGLVHFFLEKE-DIYVKMK 81  
 AmelOr50 KPLGAWPASSSTTKME----RIISQILIVICWIIILFTVIPGILYILFVKQ-DIYVKMK 81

AmelOr26 KPIGAWPNLTKATRTE-----KLLVKKLLNFICHSLIIFTVMPCIMYIFYEDE-SLKTRMK 85  
AmelOr53 KPIGVWPLIYNQTSRFE----QLISIIILMGTCFSSLLFIILPSGHHILFVEK-NLHMVKV 88  
AmelOr54 KPIGVWPLISNQTNKFE----QLVSIILMITCFSSLLFIILPSGHHYFFVEK-NLNMKVK 88  
AmelOr52 KPIGVWPFVYDRTSRFE----QLISIIILMATCFSSLLFIILPSGHHIIFVEK-DMHLKVK 86  
AmelOr51 KPLGIYFYFIYNQANKFE----KILSIILILICFFIIQFVIVPFQYIILFYEK-DMNTKIK 86  
AmelOr55 ISIGIWPTVLKNIG-----KFLPKIVIGINNLMCFFILIQSALHIILEQK-DTLLRLK 84  
AmelOr57 ASIGIWPTVLKNIG-----KILPKIVIGFNNLLCFFTLTQSALHIILEQK-DTLLRLK 84  
AmelOr56 TCIGIWPIILKNIN-----KILPKIVIGINNLLCSFILIQSALHIIEEEK-DVLLRLK 84  
AmelOr58 NSIGIWPTVLKGID-----EYLPKIAIALSNLVLVSFTVIQCVLHILLEQK-DPILRLK 84  
AmelOr59 KSIGIWPSIFKDVS-----KFLPKIMFGLCNFVLLFFAIIPCILYIVIEEN-DTMRFK 85  
AmelOr60 KSIGIWPIILKDVA-----KFLPKIVIGISNFVLLFAIIPCILYIIEEK-NNLKIK 85  
AmelOr61 KSIGIWPSVLKSVS-----RFLPKIMFGFNNFVLLFSVIPCILYIVYEEK-NIMIKFK 85  
AmelOr63 WPVGTWPLQVF-----NTFSIIRATFSTFLLLLMLTILQVELYLDSS-NPEYNLD 73  
AmelOr64 WPLGTWPLQVF-----NTFSIIRAMFSTFVLVLLMLAILQVELYLDSS-NAENNL 69  
AmelOr66 WPVGTWPFQVY-----DIFSLTRTIFSIISLLLLMIAIVQVELYLDRT-DAENNL 69  
AmelOr65 WPVGTWPFQVY-----DTFSLTRTIFSIISLLLLMIIIVQVELYLDRT-NAENNL 69  
AmelOr67 WPVGTWPFQVH-----EIFSIRTIIFSISLLLLMVVILQVELYLDRT-NAENNL 69  
AmelOr114 KFIGIWPEERKWNQAS-----NYLVLPFIFLMLCFICAPQTNLTIIISNDFNLVNIENLS 55  
AmelOr115 TLLGVYPEPRKMSRNSRLM--SSLIFWFTTTLVTFTFICAPQTANLILKSTSLDEVIENLS 70  
AmelOr118 RIFGIWPDSPYKPKKI-----ITWIIILPTFLVQYWCYCIHKLKGL-LIDLDDGLS 60  
AmelOr164 RLIGAWPNSSCQILKY-----IMWTIVMSIFLIFQYSYCIHKLKATLIDLDDGLS 66  
AmelOr163 RLIGWVWVYSSYRIMQR-----IFWTIIMGNSTVFLQWYCYISYFKTADLFDLLDGLS 65  
AmelOr165 HFAGIWPGTFFPYLHK-----LGLWAAIAALQSYQYRYIVMHYKSDNLSIIDNLS 66  
AmelOr166 YFAASWPGASFSILHK-----FFWTIFCTLHISQYSYLMHYKYDALTEIIDNIS 66  
AmelOr167 RLIGIWPKSSYEIIVR-----FMWVIIMMCAQIFQYQYIINHIGFDNLADLIDSVS 66  
DmelOr35a LNHFIFWPLDPSTGKWR-----YLDKVLAVAMSLVFMQHNDALRYLRFEASNRNLDAFLT 80  
DmelOr74a LNHVAVWPLEAESGRWTV---FLDRLMIFLGFVLFCEHNEVDHFYL--IANRQMDNMLT 81  
AgamOr3 TIAGLWGDERSQRY-----RFYLI-FSYFCAMVVLKPVLFQYDP--LEVAVR 83  
AgamOr5 RFVGLWGERRRYR-----KFRLA-FLSFCLLVIPKVAFGYDP--LETMVR 63  
AgamOr13 QLFGVTGSPERF-----RILPV-MLTYFFFIVVPKCFYGYDP--LEITII 63  
AgamOr15 RVFGVTNHSEERF-----RIVPV-MLAYFFFIVVPKCFYGYDP--LEIMII 63  
AgamOr17 RVFGVTGGPDVRF-----RILPV-MLTYVFCIVVPKCFYGYPN--QEIAMI 63  
AgamOr16 RLVGVSQTQSERY-----RYVPM-FVLFLLTIAIPKIAFGYPN--FETSII 63  
AgamOr55 HAVGIANGETFSSH-----RFTAV-YLLFIFIIAIPKLFQYTS--FEASV 64  
AgamOr18 RVIGVWDVPPQYRY-----RYAAV-FLSYCFGILIPKLCFQYPT--LEASIR 63  
AgamOr14 ERLGFWGDRTRV-----RYPVA-FVAFWITVAIPKLATDYS--VELFIC 63  
AgamOr51 ERLGLWG-ESYRA-----RFLFV-VVAFSITVCIKFTTTYTN--LETFC 62  
AgamOr12 QLSGFRQDTEQLG-----TRIYLNLFIFVAAILIPKVCFPYDP--TEAMVR 64  
AgamOr19 KLSGLTQETTRFG-----AINFLNLFYIAAVLVPKVCFPYPN--TEAMIR 64  
AgamOr20 KLSGLTQETTRFG-----AINFLNLFYIAAVLVPKVCFPYPN--TEAMIR 64  
AgamOr21 RLSGFRQETQLE-----KQIFNLFVYVAALLIPKVCSPYDP--SEAIR 64  
AgamOr50 RLSGFSPTQLE-----RCIYVNLISYITVILVPKVCFPYPN--TEAMIR 64  
AgamOr29 KLFGLGRDEKLL-----LYWVQ-CVFYLVFSIIPRVLVQIDD--TIMVLR 63  
AgamOr53 KLFGLGRDERFKL-----YWLQ-CVAYLAFSIVPRLLEIED--LEALMR 63  
AgamOr30 MLCGCPRSARVNR-----RFWLL-GVFFFVFGQIPRFLIKIDE--PIALVR 63  
AgamOr46 ALLGVNKNPSERF-----RLYAI-YIYLWVAMFIPKLCCLGYET--IPQCFR 64  
AgamOr47 ALLGVNKNPSERF-----RLYAI-YAYLCIALFIPKLCCLGYET--ILQCFR 64  
AgamOr48 AMLGLWGDRRKLY-----RLYAL-LLLAYVAIIFPKPVIRITDRHPFESIVR 68  
AgamOr49 EHSGLWGDPRRKR-----SFALM-LLGTVLLLIVPKIVLGTGSDSFDIAR 78  
AgamOr61 TISAIHYDAS---CWF-----RAIWIVYRSLPILVNIYSFYKAYRLILFEDNT 81  
AgamOr62 TLFALHYHTRQPRWTVK-----KLLWTVYRTRYLLSYLSYCYKVYWLFSHWQYST 86  
AgamOr63 KIYAIHYTPHG---WHD-----RILWYLYRALYGLIYLSYIHKTHWVLLHHPQDSF 82  
AgamOr60 FLFAIRNDAPRG---VGQ-----FMRWCFHLMAPVFLSSYCYKAYWYMSHSEYSF 81  
AgamOr75 VVSPAMLLQRP-----R-----SNLEVALKTLCLSMVAHTIALAYDFSQQT DVR 80  
AgamOr76 VVSPAMLLQRP-----R-----SNLEVALKTLCLSMVAHTIALAYDFSQQMDVR 80  
AgamOr78 VVSPAMLLQRP-----R-----SNLEVALKTLCLSMVAHSIALAYDFSQQT DVR 80  
AgamOr77 TINGIHLHDDSR---LA-----RAFEYTFYALQLVQLLNGYNFAVLCSNDTISLE 67  
AgamOr79 TINGIHLHDDSR---LA-----RAFEYTFYALQLVQLLNGYNFAVLCSNDTISLE 67  
AmelOr99 RFLGQDPRQKDEFNRNIIV-----FILISIASIVIPTTLELYISLRNKDVGIVIE 77  
AmelOr101 RFLGQDPRQKDEFNRNIIV-----FILVISIASILIPTTLELYISLRNKDMDGVIE 77  
AmelOr102 QLLGQDPRKNEFRNFIV-----TVVVISISGNIVPTSIELYTSLCDKNMDAVIE 77  
AmelOr103 QLLGQDPRKNEFRNFIV-----TVVVISISGNIVPTSIELYTSLCDKNMDAVIE 77  
AmelOr104 KFLGQDPRQRDGFNRNIIV-----IVMVASISGILIPTSLELYTSLRDNKMDAVIE 77  
AmelOr98 QFLGQDPYQECKYRNIIIT-----IIMLISMIAIFIPTTFEIVYSIHDKNTDVAVME 77  
AmelOr100 -----MFE 3  
AmelOr97 -----MICSLISFLIPGLSRVYISIVEKLNALME 30  
AmelOr105 TICGINPYQNNISISIIII-----IMISVCMFLCPTSIQLWEAISNKDFDNI IQ 77  
AmelOr109 QLVGVWVWYQKFFKTCIR-----FITFTIMIFSLATQISRVIIVFYSS--LDVLS 65  
AmelOr110 QLVGVWVWYQERFIKTCMR-----FIVSVIMLLDLATQISRVIIVFYSS--FDVFS 65  
AmelOr111 QLVGVWVWYQRFIKFCIR-----FITSVIVVLTLLAAQISRVIIVFYSS--IDVLS 65

AmelOr108 QLVGVWPYQERFTKFCIR-----LTIFAI I ILLTTLTQIYQVIVFCT---LDALS N 65  
AmelOr107 QLVGVWPDQGKFMKFLMR-----F I I L I V M I I A F I A Q I S R V A V F Y S ---V D V L S D 65  
AmelOr112 L I T G W V P Y Q N Y R S K M A E R -----F I S V T V M M S G F V T Q F A Y L V L N P T ---M D K I A T 65  
AmelOr113 K L S G I W P D Q N K Y L K Y I S W -----I I I Y V I S I P S I V V Q I A R I V H I S T ---A N V I E 65  
AmelOr106 I I V G M W P N Q K R --K T I P R -----I F V E L I A I L A H L T Q G G N M V L F F S ---L T L A M D 62  
AmelOr122 K I V G L W P Y D K S I Y V W I Q R -----I C L S M Y F L I G V I F Q I I L L V K S E I --T L R N Y I V 65  
AmelOr125 K I V G L W P Y D K S I Y V W I Q R -----I C L S M Y F L I G V I F Q I I V L V K S E I --T L R N Y I V 65  
AmelOr123 K I V G L W P Y D N S I Y V R I Q R -----I C V L I Y F L I G I L I Q I F S L V K S E I --S L R N C I V 63  
AmelOr126 K I V G L W P Y D N S I Y V R I Q R -----I C V L I Y F L I G V L V Q I F S F V K S E I --S L R N C I V 63  
AmelOr127 K I V G L W P Y D N S I Y V R I Q R -----I C V L I Y F L I G I L I Q I F S F V K S E I --S L R N C I V 63  
AmelOr128 K I V G L W P Y D N S I Y V R I Q R -----I C V L I Y F L I V V L V Q I F S L V K S E I --S L R N C I V 63  
AmelOr129 K I I G L W P Y D N S I Y V W I Y R -----L C L L I Y F L V V V L V Q I F S L A K S E I --S L R N C I V 63  
AmelOr133 ----- 63  
AmelOr134 K I I G L W P Y N N S I Y V W I Q R -----L W I S A L F L G N I I F Q I V L L L R S K I --T V R N C I L 63  
AmelOr131 K I I G L W P Y N N S V Y V W I Q R -----L C I S A L F L G N I I F Q I L S L I R S E I --T L R N C I L 63  
AmelOr132 K I I G L W P Y N N S I Y V W I Q R -----L L L L T F L G N I I F Q I M S L L R S E I --T L R N C I L 63  
AmelOr135 K I V G L W P Y N N S I Y I W I Q R -----L L L L T F F L G N V I F Q I V S L L K S E I --T L R N C I L 63  
AmelOr136 K I V G L W P Y N N S I Y V W I Q R -----L W F L M F F F G N I I F Q I M S L L T S A I --T L Q N C V L 63  
AmelOr138 ----- 63  
AmelOr130 K I I G L W P Y D N S I Y V W I Q R -----L C L L S Y F F A N I I F Q I V S L L R S E I --T L Q N S I L 63  
AmelOr137 K I V G L W P Y N N S I Y V W I Q R -----L W L L I F F L G N I I F Q V V S L S -S E I --T L R N C I L 62  
AmelOr139 K I I G L W P Y N N S I Y V Y I Q K -----L Z L L I F F L G Q I I F Q X ----- 50  
BmorOr20 R L L G A W P G H Y L G E E T G S ----K Y E C A P M F L L M F I K I A C L Y L T I V Y L R N N A D V L G F F F E L G 82  
BmorOr3 R L L G A W P G H Y L G E E T G S ----K Y E C A P M F L L M F I K I A C L Y L T I V Y L R N N A D V L G F F F E L G 82  
BmorOr18 R L L G A W P G H Y L G E E T G S ----K Y E C A P M F L L M F I K I A C L Y L T I V Y L R N N A D V L G F F F E L G 82  
HvirOr6 D F I R T W P R K E L G E P E N L ----A F T V F M Q Y F Y L I L N I V T V M G S T S Y I V V R G S E L S F I E A G 87  
BmorOr23 K I M D F W P --E R E E K N S K ----T R I F R L R Y I L V L Q F C F T L V A G V L Y L T N S V G K Q T F Y D L G 83  
BmorOr16 K I M D F W P --E R E E K N S K ----T R I F R L R Y I L V L Q F C F T L V A G V L Y L T N S V G K Q T F Y D L G 83  
BmorOr4 K I M D F W P --E R E E K N S K ----T R I F R L R Y I L V L Q F C F T L V A G V L Y L K N S V G K Q T F Y D L G 83  
BmorOr5 K I M D F W P --E R E E K N S K ----T R I F R L R Y I L V L Q F C F T L V A G V L Y L K N N V G K K T F Y D L G 83  
BmorOr22 K Y I D G W P N M D M N K K N V S ----K I R F H K R H L L V V E Q T I T F L S Q M F Y I V K N Y G K L S F F E I G 89  
BmorOr17 K Y I D G W P N M D M N K K N V S ----K I R F H K R H L L V V E Q T I T F L S Q M F Y I V K N Y G K L S F F E I G 89  
BmorOr1 K I I C A W P E K Q L N E I R S L ----G H S I H -R V I L P I Q S V V C L A C G I L Y I H F H F N E I P F F I L A 84  
BmorOr1a K I I C A W P E K Q L N E I R S L ----G H S I H -R V I L P I Q S V V C L A C G I L Y I H F H F N E I P F F I L A 84  
BmorOr1b K I I C A W P E K Q L N E I R S L ----G H S I H -R V I L P I Q S V V C L A C G I L Y I H F H F N E I P F F I L A 84  
BmorOr19 D L T --W W G Y T F P K Y V G W ----F Y H L Q C N V V R L F G K C V V S Q I L F I I L N Y Q T I D K S V F I I 82  
BmorOr15 D L T --W W G Y T F P K Y V G W ----F Y H L Q C N V V R L F G K C V V S Q I L F I I L N Y Q T I D K S V F I I 82  
TcasOr5 F G L P A Y K I I K T P N F K S L T H --N N S K L N Y I M V I I S T T A Y L Y Y F K V G D K N T N S F E K H M T M Y R 79  
TcasOr7 K E L G --K I H K D L N K L A M E V --N E T -F G E L M L L R F S G D F I Y I V G L S S N A V L N A E Y E T V L D 75  
HvirOr4 V I C T L F G L V A E I N V G V E L S --V R M S S R M S Q V V S T C D V L V V V A T A G A G V Y G A P R R M R N M L K 70  
BmorOr13 N V C T L I A V M I D F S V P V K L S --I R M Q T E T K R F V W I A D V V I M G I L S G V G V Y T A P I Q M R R L I A 118  
DmelOr10a D I M G Y W P G K T G D T W P W R -----S L I H F A I L A I G V A T E L H A G M C F L D R Q Q I T L A L E 76  
DmelOr33c I C M R L L V P T F F K D S S R P -----V Q L Y V V L L H I L V T L W F P L H L L L H L L L L P S T A E F F K 66  
DmelOr7a A L G M Q A P D G S R P T S S T W Q --R I Y A C F S V M Y V W Q L L L V P T F F V I S Y R Y M G M E I T Q V L T 86  
DmelOr22c L I V G L W P Q R I R G G G R P -----W H A H L L F V F A F A M V V V G A V G E V S Y G C V H L D N L V V A L E 75  
AgamOr1 K Y L G L W P P E D T D Q A T R N -----R Y I A Y G W A L R I M F L H L Y A L T Q A L Y F K D V K D I N D I A N 79  
AgamOr4 H I V G M N G A G F R S R I R V G G -----I F L F Y L I F L V I P P L T G G Y T D G H Q R V R T S V E F L F 74  
DmelOr47b F Y Y V R A F L S L L C Q Y P N K K L --A S L P L Y R W I N L F I M C N V M T I F W T M F V A L P E S K N V I E M G D 94  
AmelOr73 T Y G G Y W R P T K W P A S S Y K -----Y H L Y N I Y S A F M I F L L Y F I T F C T C V D S L I S K N L K T M S E 65  
AgamOr68 R L I G A G L W E K Q E G I L W G -----R V A S V M Q I V L F L T L H A W T G Y K Y R D A L Q M L E 67  
DmelOr59a T A W R Y L G V A H F R V E N W K N -----L Y V F Y S I V S N L L V T L C Y P V H L G I S L F R N R T I T E D I L 70  
DmelOr23a R I C G A L D L S E G R -----Y W S W S M L L C I L V Y L P T P M L L R G V Y S F E D P V E N N F 65  
AgamOr31 R A I G I A R T D S F R G -----R V L F A V S F F T V L V M M L G T V M F A F K H I D Q I M L L C D 64  
DmelOr2a R V W E L T G L M R P P G V S S -----L L Y V V Y S I T V N L V V T V L F P L S L L A R L L F T T N M A G L C E 72  
AmelOr62 K I I G I W P T N G E R S F F G -----R W I F A V T T Q I G I I Y I L S L E I Y R H C L D I D D T M D 70  
AmelOr121 N V I C L W P V E E Q N M R K Q S -----W T K L H I M T C F M L I T F V C T I P C L C A L K Q C N N L M E V T 77  
AmelOr140 P I I S I F Q S A S M Y F N G I F N -----T K K I K N I L L F I K N D H K Y Y I N R P E N I I L Q K Y D L Q 71  
TcasOr12 K C I Q F F G Y F S P D F R N N S Q R --K L L F R I Y A A L F V G F A F I L S L L S Q I A N M V D A F G D I E K M T E 75  
AgamOr8 A M I G V A R Y G E P K R T L R A Y ---L K H L L F W S S C I N T G F C L V I E H I Y F V K A A G N F T N F L Q L T A 79  
BmorOr9 W L M G I P F D N P K I Q I R -----Y Y V L L L P L S L M L I E E I A F F G S R M S S E N F L E L T Q 65  
AgamOr40 R L M A V W P T D F N P Y L P Q Y L R --G R F F L S E L F D F G Y Q L F W Y F I C V H I A A F H I M S V L T G D L S Y 81  
TcasOr63 L V V G F Y P K R D N K H E I L Y -----W L S A F F N L L I S Y G Q L T T M I I Q M V F D R S D L S K L T E 72  
TcasOr4 R Y G S F Y P C G K R I K -----F I F L G L F M F V Y S W T E F L S M I T V L F V E R D N L S K L T S E 65  
TcasOr13 R I F C L Q P L W I K T D Y S Y I S K S G P Y M A Y S I L T S L F L I T A S I Y G L T Q V Y S M E A V Y L I R L S S 84  
AgamOr24 K S M G V S F F K R K H S F V N -----F F F I F G I S N L V L Y V V S V L I S S Y K S R H D I I K L I Y 60  
AgamOr54 R V G G M L G I D I F T P G Y S S T N -----L L L R M V L L N T F T F F W I N L Y S L T T T Y G N L V D F M Y 86  
AgamOr23 D L P G D G S H S V R K P L L D R -----D R L G I A D G C C V L L C Y A G N R Y T G E L M K F Y F E H S I T 70  
AgamOr64 R S L Q L F G N P V R C L Q E F G T V R ---G L F V Q L C R F L F L L P Y A S F A L K S Y W Q L N H P L D T N N S I L 92  
DmelOr82a R A M G H K D M D S T D S T A L S -----L K H I S S L I F V I S A Q Y P L I S Y V A Y N R N D M E K V T A 63  
AmelOr116 Y Y I G L W P D R V K Y K Y L Y N -----L Y T I C S L I F L V G I I I V S E I I Y I I I N W G K I B I M M T 78

AmelOr160 GLSGLWPDNRND-----VRFFLYITYVVI FTWLEIVTLVQNIHDLKTLK 70  
TcasOr10 KSERFWKLD RFGDLQAKN-----LHSTYPIFQIFFYVYVILFLT CAMFALVNW 65  
TcasOr26 KRMYLWPTASVTSR-----KPAFFLITFSCFLLYGSMHLIVNDISMEEVH 55  
AmelOr117 SIAGMWPIDEKSSIFSK-----IFAYVRLIFGLIIVNSFFIPQIIIIIVMNWKNIKIAG 74  
AmelOr120 KFGVGFYPIN-----ILRYVICISCIMFIVIPQIIIMIIYNWDLNIVME 64  
BmorOr7 RCCGFCRLSRSTARRGLS----VAHEVYRALTLTLTVVYLLQECIYAYQERTMDKLSR 71  
AgamOr6 LMMGIPPCEEPYPPGVLP S-LKRNAGFIASFLLLAYTTIGELIYLKQMFERDVTFLVTF 76  
DmelOr45a EIVGFDPSTPQLSLKHP-----IWAGILILSLISHNWPMVVYALQDLSDLTRLTD 63  
DmelOr67d FCVGF CGNDVADPNFR-----MWLTYAVMAAIAFFFACTGYTIYVGVVINGDLTIILQ 75  
DmelOr83c SLTNLLGVDFLSPKLFKN-----YRTWTTIFAIANYTGFTVFTILNNGGDWRVGLK 70  
AmelOr162 NEYEILCEHYAIARKITTS-----FVAFLLGLTTPFGAMPLLLNIGDALGLCNI SDDR 72  
HvirOr3 -----MSGDKVTEERKKLMANYVM 19  
TcasOr20 TYLNMLPEKTTFTCTTIQOY-----YVSVIITITTFPILADLVSQFYEESISFTSVNE 66  
AgamOr11 RYYGILLGQSQSYKKVH-----CFRGMVFTLSMVLFNCTQYIDLWQVWGSVSDMTA 77  
DmelOr56a QWYGYVASKDQNRPLLS-----LIRCTILTASIWLSICALMLARVFRGYENLNDGAT 77  
AgamOr28 DLYVYWF LTFPIASLCVP--QIFRVMKMLKQTKQIIHFYLSLQFTYLVVDTKSLIDFIS 90  
AgamOr58 RFIGFFAWDVKLNATWLK-----MTLIVFAVGYEITAIAAMALASVKGFPTERSFT 79  
AgamOr59 YLRYLRPFQLIAGYPINRPALSKLATVVRLLAYLTYLGTLLHKLISYVLRPEIDINYSF 86  
DmelOr1a ARMGLDLQPDKKG NVLRSP-----LLY CIMCLTTSFELCTVCAF MVQNRNQIVLCSE 71  
DmelOr13a KLNGSWPLTESRPPWRSQS--LLATAYIVWAWVIVASVGITISYQTAFLNNSDIITTE 78  
AmelOr161 KIIISIWPLAENSSRITITFR-----RFHLFCMFFLVIVMSVAVTADVHNIDDLDEATE 74  
AmelOr141 KLCGIVPCGDGFARN-----ILAWLAFSCLTIYSISYVHEFITNTNTLTTALE 69  
AgamOr52 WLRALF-----LLYQLLLPTQAI IWLWRTWAVAYIEHNKPLAIS 55  
AgamOr36 ALPGFHLVVEEERTSSWKR-----ALFLLSRTVQLLQYALWADR FYLALVDPSSPPGKALH 86  
AgamOr25 KWLGF DVIDPNWKVTP-----LTMFTIVMFALQHYTTYLYLSTHLD MFD MFE 64  
AgamOr45 RISSHMAVLKLNIIDPAWR-----PTLRF GIVLFLTALVPVYIWQGIKVYRTRFETLLE 71  
TcasOr3 KLTAFWIYDDETRRKK-----YLQHAYNIFWIFYLFVAYQPAELLYVYYSFNDLSVFLR 76  
DmelOr88a QMVHFQWRRNPVDNSMVN-----ASMVPFCLSAFLNVLFFGCNGWDIIGHFWLGH PANQ 79  
AgamOr22 YEVFHWFLKISLLRIFDDDFLVAVPPTLTFQFHETELVSLGVI LLHAYCYRNDLDTIIL 78  
DmelOr49a KTLGIDL FHTPKPWWRYLL---VRGYFVLC TISNFYEASMTTRIIEWESLAGSPSKIMR 75  
DmelOr85f WIMGYDMLGVPKTRSRR-----ILYWIYRFLCLASHGVCVGVMMVFRMVEAKTIDNVSLIM 74  
AmelOr119 VVVGQMAHASGHEWMKSIRTLTSIKINYLKYSGLGEIDSSCSRILKYAYFVYKVMMLVS 86  
DmelOr63a YTVGFNLLDPSRCGQVLR IWTIVLSVSSLASLYGHWQMLARYI HDIPRIGETAGTALQFL 85  
DmelOr67b VEYSAYALGVNIAPKRSS---KYCRLTRILVLI VNL SIIYSLVAFIMENYIMSFETYVE 79  
BmorOr21 IAAMIYPNPATEKRRLIYIG-----LMLLSVIPLAFMIVTEMYEFFMASDLNNTIR 71  
BmorOr11 HMNRSHPSIKRNKIWLLQ-----FISLMTLTAFCATGLITSLLFHDLKFGK YMEASK 71  
BmorOr12 GLQGIWVDEIKLSRRFHV F-----FKVVTFILHIMCGMFAGLQFFAIFTQNSLNSQQKSD 81  
AgamOr33 YIDELWECVEQMOTYHEH-----YLLQGEWFVRRMRRLQERMLQDASKLLATLL 70  
HvirOr1 KVDVAKPKVKNITTFQDALRATLIIGQVFSLLPFVGVFTNVASNVKFIKTSWKCGY SLLS 79  
HvirOr5 YSISILS-----LVLVSKLYYNWRTNIAGVWGKVERSVGVKIP 54  
TcasOr1 YLFQMRNV PQS-----YCFVTILFDSVNKLG TQIVNPYSVKQYVMQQQVK 61  
TcasOr2 QIFGLITFGCSNRCFFPSK-----IRICWNVLLNCVYLF LFCGFCVYEFASDERIKLVIK 79

TcasOr16 NTITVLFFTHCVTKFVYFAVRSKLFYRTLGIWNQPN SHPLFVESNN-----RYHGI 127  
AmelOr2 NTITMLFFTHSVVVKLVYFAVRSKLFYRTLGIWNPN SHPLFAESNA-----RYHQI 125  
AgamOr7 NTITTLFFTHSVTKFIYFAVNSENFYRTLAIWNQTNTHPLFAESDA-----RYHSI 125  
AaegOr7 NTITTLFFTHSVTKFIYAVANSEHFYRTLGIWNQPN SHSLFAESDA-----RYHSI 110  
DmelOr83b NTITTLFFTHCITKFIYLAVNQNFYRTLNIWNQVNT HPLFAESDA-----RYHSI 127  
BmorOr2 NTITVLFFAHSI IKLAFFAFNSKSFYRTLAVWNQSN SHPLFTESDA-----RYHQI 128  
BmorOr2a NTITVLFFAHSI IKLAFFAFNSKSFYRTLAVWNQSN SHPLFTESDA-----RYHQI 128  
HvirOr2 NTITVLFFAHTI IKLAFFALNSKSFYRTLAVWNQSN SHPLFTESDA-----RYHQI 128  
AgamOr56 AANEQIVFSLICCKLCFYAIHFRRWEKLYYDLQRSFSTVLNNPN-----113  
AgamOr57 AANELIVFSLIFCKLCFYAIHFRRWEKLFYDLQRSFSSVLNNPS-----113  
AgamOr26 AINEQIVFCIVFLKFSFYAIHFRRWEQLFYDLQRSFSTVNNPS-----113  
AgamOr27 ATNEQILYFIAFFKLYFYVIHYRRWEKLFYDLQIAFSSVMTNPS-----113  
HvirOr9 LIPCLILTLISDFKTL SLLYARHNNEFIVTMKSLLLN QKQLEEKE-----TRF-- 124  
HvirOr7 VAPCLTFSILSMIKSLYHLMYEEHIEQELIELLELRENNREKCI-----E--- 100  
DmelOr85b ALSYIGFVTVGMSKMFFIRWKKTAITELINELKEIYPN-GLIREER-----YN--- 116  
DmelOr85c VLSYIGFVIVGMSKMFFIWWKKTDLSDLVKELEHIYPN-GKAE EEM-----YR--- 115  
DmelOr85d NLSFIGFVIVGDFKIWNISRQRKRLTQVVSRL EELHPQ-GLAQQEP-----YN--- 137  
DmelOr67a LLSYVSFVVMGLSKIGAVM KKKPKMTALVRQLETCPSPSAKVQEE-----YA--- 129  
DmelOr67c VAPCIGFSLVADFKAAMIRGKTLIMLLDDLENMHPK-TLAKQME-----YK--- 128  
DmelOr92a VAPCIGFSFMADFQFGLTVNRKRLVRLDDLKEIFPL-DLEAQRK-----YN--- 133  
DmelOr69a MCSSFCLTFVGF CNVYAI STNRNQIETLLEELHQIYPR---YRKNH-----YR--- 124  
DmelOr69b VASMLGFTIVGTLNLWKMLSLKTHFENLLNEFEELFQL---IKHRA-----YR--- 124  
TcasOr6 ATESFFTQYGLAWKIAV FVVYKTELAQIIR-LCDNLWPLDEFGTGH-----NFQF- 93  
TcasOr11 ASEAMIVQYQLFIKIAVLLKHRKNLVVLMQ-KTRKFWPLDKFGQDA-----KIER- 110  
AgamOr41 VLITIFFATIGIGHISVFL LCS-KLLAEELLEQSYR TYRLVVD-DQR-----EQRI- 116  
AgamOr42 SIVVLFYIGIVG VTRLA VAISNP-AGCYRSIQIAEEMYQRANGSNPA-----ECNV- 122

AgamOr43 SAAIFGVFIQGLAKFYTALRYRKFEEAMYNRLDLFHYEYRNHE--K-----NNAT- 117  
 AgamOr44 SAAVYGVFIQGLAKFYTALRYRKFEEAMYNRLDLFHYEYRNHE--K-----NNAT- 117  
 AgamOr66 SLSFLGFFFQCSLKMYYTIQQAPQYAVNFCLKEAIYERHSGKTLA-----KQTT- 115  
 AgamOr67 SLSFLGFFFQCSLKIYYTIQQAPQYAVNFCLKEAIYERHSGKTLA-----KQTT- 115  
 AgamOr72 VLITMGTAQVLYIKFFVGHKSQAQEIIMLVTALEQQVLKRYQNGSEQ-----EIAV- 116  
 AgamOr73 VLITMGTAQVLYIKFFVAHKSQAQEVKLFVLEQEVKRYQNGSEE-----ETAV- 116  
 AgamOr71 VLITLGTAVQVLYIKFFVWHSKQEVKLFVLEQEVKRYQNGSEE-----ETAV- 116  
 AgamOr74 VLITLGTAVQVLYIKFFVGHKSAREINLFTAKLEQEVKRYQNGSEE-----ETDV- 116  
 AgamOr70 VLITLGTAVQVLYIKFFVGHKSKEVIVFSNKIEQEVFEQKNRRTAG-----ETVL- 116  
 AgamOr69 ALITLGTAVQVLYIKFFVGHKSKEVIVFSNKIEQEVFEQKNRRTAG-----ETVL- 116  
 TcasOr9 -----  
 TcasOr18 NPFDLVQEAMIIMSLVIFYKN---WQNMVALVTNINKNFHRATDNVI-----EKIS- 105  
 DmelOr83a NCLIQTIIYLTWTIAMKLYFRFRPGLLNTILSNINDEYETR SAVGF-----SFVT- 138  
 DmelOr85e DALMTMTIIYFFTYGTIYWC--LRSRRLAYMEHMNREYRHHSLAGV-----TFVS- 147  
 TcasOr24 DIAILATNTGYILMMLLYII--RQKDLESLLVDLSSFKKYQKPPKF-----D---- 117  
 TcasOr25 DLAILASNIGYVLMMTMYV--RQKDLLELLDLSDFKTYGKPPNF-----D---- 117  
 TcasOr19 DLGIFAIIIGLVTTMMVLYV--SQDKVHLLAKLGTHEIFGTPDNF-----D---- 82  
 TcasOr22 NIAVLSAVTGLTYMLIVFVW--SQDKLVHLLAKLGTHEIFGTPDNF-----K---- 111  
 TcasOr23 NIAVLSAVTGLTYMLIVFVW--SQDKLVHLLAKLGTHEIFGTPDNF-----T---- 111  
 AmelOr168 DGTVMNMLLEVIILNVYLH--SRKKLLRELIGKLNQILINDEIF-----RNV-- 113  
 AmelOr170 DGTVNIAISFEVIVFNIYLH--SRKKLLHKLIGKLNHLLITDEIF-----RSV-- 113  
 AmelOr169 DSTVNIVISLEVFVLIYVYLH--NRENLLRELIGKLNCLLIVDDETL-----RDV-- 115  
 DmelOr65b DLAFILGAFFIIFKTYFVWYGDDELQVIVSDDLALHPWAQK-----GPNP 111  
 DmelOr65c DIAFIIGFFYIAFKIYFQWYGDDELQVIVSDDLALHPWAQK-----GPGA 111  
 DmelOr65a DLVFIITIIIFICFRLVFFAQYAGELDVIIDALEDIYHWSIK-----GPAT 142  
 TcasOr17 SIFVTLSCGLTVAKTYLLQNMQLKELFISIN-KDIFQPK---N-----NKQIL 116  
 TcasOr21 TAYVLLTEILAVIKTYFVVKNMKMLKHLMQSLNNKLFQPR---S-----HEQIK 116  
 TcasOr56 GLCYCVTHVLGTVKMFMLLYLRKKLWGNLTTLE-EGIFKPNPTRGG-----PEELQ 124  
 TcasOr15 GLCCCVTHVLGAAKMFMLLYLRKKLWGYFTTLE-NGIFKPNPCRGG-----AEFE 122  
 AgamOr9 GMFVLLTQLVMILKMEFFYKRVFKIQQ-LIRRLNGKLYQ-S---R-----NAEED 134  
 AgamOr65 GMFVLLTQLVLILKMEFFYKRVFKIQQ-LIRRLNGKRYQQS---G-----NAEED 138  
 BmorOr6 ALYMFFTQTTCCSKAIGFYFNFLKIKR-IVASMDVLFVTAM---S-----IEDQA 113  
 BmorOr10 ASILLFTQASVCYKMTAFISKTNFVI-LLGLIESEIFSAQ---T-----ELHEK 112  
 AgamOr34 IMYIFLTETAMILKTLTIYRHFNIVWS-LYETTLGVSFQPR---D-----EQERE 115  
 AgamOr37 IMYIVFTEIVMALKAIIVTYKFDQLCD-LYRQTLGSDFKPL---D-----AEEDQ 127  
 DmelOr94a VLYMSITEMALVVKILSIWYRTEAWRLMYELQHAPDYQLH---N-----QEEVD 122  
 DmelOr94b VLYMSITELALVTKLLNIWYRREHAASLIHELQHDPAFNLR---N-----SEEEK 119  
 DmelOr71a VLLICLTTTALGGKVINIWKYAHVAQGILSEWSTWDLFELR---S-----KQEVD 115  
 DmelOr46a AIFILATSAGHTTKLLSIKANNVQMEE-LFRRLDNEEFRPR---G-----ANEEL 114  
 DmelOr46b VFFMFATEISCMAKLLHLKLSRKLKLAG-LVDAMLSPEFGVK---S-----EQEMQ 114  
 HvirOr8 NMVFYFTDSATLSKVMITIGFMRKKILQ-LFEMLESDFIQPD---N-----AEGLA 112  
 BmorOr8 EVIFCFTEITVSTKVLMLFKRNKILD-AFDLLNKNEFRGN---S-----EESSA 114  
 AmelOr68 SFYMFIASSLSCCKIVALMNHKAIKI-FRRKLEEEPCPKPT---N-----TKEVT 111  
 AmelOr69 NFYLTLAIFISCHKMYSMLVNRENIIL-VNRMLESEPFQPE---T-----EEEMD 110  
 AmelOr70 NFYITLVVFTVSTCKMTIILRYRKNILS-LMDDLQHEPFSPM---T-----HEENE 111  
 AmelOr71 NFSVTVVFTVSTCKLITILTRRENILL-LCNTLKQEPSPISPI---N-----TEEFE 111  
 AmelOr72 NFGITITVFTTICKFINLLFRGIIIS-LLDLLQKEPFLPM---D-----IEEIK 111  
 DmelOr19a SLCVTPHPTLYMLKLINVRRMRGQMISSHWLLRLLDKRLGC-----DDERQ 117  
 DmelOr19b SLCVTPHPTLYMLKLINVRRMRGEMISSHWLLRLLDKRLGC-----ADERQ 117  
 DmelOr33a SLHVTSECLFCSYKFFCFRKLSEIKEIEILFKELDQRALS-----EEERN 111  
 DmelOr33b GLPITAACFFASFKFICFRFKLSEIKEIEILFKELDQRALS-----REECE 113  
 DmelOr22a SLEIGVNMYSFSSFKCAFTLIGFKKRQEAQVLLDQLDKRCLS-----DKERS 131  
 DmelOr22b SIQIGVNMYSFSSFKSYLTMGMGKQRQEAQVLLDQLDKRCLS-----DEERT 131  
 DmelOr42b SLQVCINAYGSSVKVAITYSMLWRLIKAKNILDQLDLRCTA-----MEERE 128  
 DmelOr59b SLQVCINAYGSSVKSTITYLFLWLRKTEIILLDSLDRKLAN-----DSDRE 129  
 DmelOr59c SLQVDINCIGNVIKSCVTYSQWFRFRMNELISSLDKRCVT-----TTQRR 131  
 DmelOr98a VMQLFFNSVGMPPFKVLFNLYISGFYKAKKLLSEMDKRCCT-----LKERV 126  
 DmelOr42a SLQVAFNAWSCSTKVLIVWALVKRFDEANNLLDEMRRITD-----PGERL 131  
 DmelOr85a YVQVPVNTNASIMKGIIVLFMRFRSRAQKMMDAMDIRECTK-----MEEKV 129  
 DmelOr43b SLQLCLNTWCFALKFFTLIVYTHRLELANKHFDLQKCYVK-----PAEKR 128  
 AgamOr2 NGYFTVLYFNLVLRTSFLVINRRKFETFFEGVAAEYALLEKND--D-----IRP 107  
 AgamOr10 NAYFAVLYFNAVLRRTLILVYNRDKYESFLAGAASVYEEIRAIN--D-----DVITK 108  
 DmelOr30a NVYLLVFTNTVVRGVLLQDRFYSERFINILKSFYIELLQSD--D-----PIINI 113  
 DmelOr49b NSYMLVLWINTVLRAYLLLADHRYLALIQKLEAYYDLLLLLN--D-----SYISE 107  
 DmelOr43a NMFFFSIAFNALMRTWLVIKRRQFEFLGQLATLFHSILDST--D-----EWGRG 111  
 AgamOr32 EIMLIQLCFVMLLKFNLFITRSGMYNLVEAFKRLKCIDKA-----EFA 108  
 AgamOr35 AIPTLVVCMVAISKFYIFVHPAALFALIDSFALQRRASRE-----DLL 107  
 DmelOr47a AMVALLITILGLFKFSMILYLRDFKRLIDKFRLLMSNEAEOG-----EEYAE 110  
 DmelOr98b SLCSVLVDLALCKIGLFLWLYKDFKFLIGQFYCVLQTEHT-----AVAEM 112  
 DmelOr9a TLGSTFASMLTLVKFLFLFCYHRKEFVGLIYHIRAILAKEIEVW-----PDARE 122

AgamOr38 SICPTVARFSGLLRMCWFLRNEHKIKSALNSVVHLIKNEHPR-----ETG 127  
 AgamOr39 SICPTVARISGFLRMVFLYLANEEDIHRVLLNNISKTLLQDEHPR-----EHT 128  
 Dme1Or24a ALCPVASSILSLVKMVAIWWYQDELRSLEIERVFLTEQQKSK-----RKLK 109  
 Dme1Or45b AFCPLACSFTTFLFKLGWMWRRQEVADLMDRIRLLIGEQQEKRE--D-----SRRKV 123  
 Ame1Or74 LTCNMMCILLGLFKCFVISFFRIEFSRIVSYAQKHFWR-LDY--D-----YDEKI 116  
 Ame1Or86 LTCNTLCIVLTMFKFSILFIRRTFEFKNLILFARKNFWH-LDY--D-----RHETI 116  
 Ame1Or75 ICCNILYVAIVLLKISVLYAHREFFNLIAFTQKNFWR--LYD--D-----PQELL 116  
 Ame1Or84 ISCNLYLMIIVVLKVGVLVYAHKMEFFDLVTFTRNNFWR--SYP--D-----PEEEL 114  
 Ame1Or87 TACNILCLIMVLLKLFVLFVHRKEFIDLLVYTHENFWH--TNY--T-----NNELL 131  
 Ame1Or76 VACNIITVSLVLIKLLTSFIYNEELLGIIRYAKTNFWH-SNYD--T-----C-EKS 116  
 Ame1Or85 IICNLVTVILVLFKISISLMYRNKLHKIIQYAKTNFWN-LKYD--L-----HDEQI 118  
 Ame1Or88 AGCNVITIVLVLKIFVLYINNEELLNVVNYAKTNFWRESNYE--P-----H-EKK 117  
 Ame1Or91 SVSNTLSLILPLLKIFILLSNKEDFFRLIVYMQRNFLQ-GNYD--D-----H-ERK 115  
 Ame1Or92 STSNTLSLILPLLKIFILLCHKQDFRLLVLYMKRNFLX--NYD--D-----H-ERK 112  
 Ame1Or95 SMCNMLSIAAPLLKLITLVVHREDFFYLLILYLRQKFLH-GDYN--D-----Y-ERN 113  
 Ame1Or93 FISIISSIMLLKIIILFSHREDFHLLILYMKRNFLX--NYD--D-----H-ERK 101  
 Ame1Or77 NTCNIITVITMPLLKIFVIVLNKDDFFHLIFYTEKHFKYK-DNYD--E-----H-EQR 117  
 Ame1Or94 IVCNSLGLVMDLLKILVVFVHKKKFLGLIAYMQKNFWH-LDYD--Q-----R-ENS 116  
 Ame1Or96 IACDGLGLVMDFFKIFSLFIYEKKFLGLMVYMQKNFWH-YNYD--E-----K-EDL 116  
 Ame1Or79 VVTNNITLIIISLVKICNIIIIYKGFNLIVDMQENFWN-VDY--D-----YHEKE 116  
 Ame1Or83 AMTNTITTIMALIKICIIILTYKGFNLIVYMQQNFWN-VDY--D-----CQEKE 116  
 Ame1Or80 VTTNNITMIMGVVKICIIILYKGFNLIVYMQQNFWN-VNY--D-----HREKQ 116  
 Ame1Or81 ATTNNTITMIMGVVKICIIILYKGFNLIVYMQQNFWN-LNY--D-----HCEKR 116  
 Ame1Or82 SITNNITMIMALIKISIIIIYKGFNLIVYMQQNFWN-VNY--D-----YREKE 116  
 Ame1Or78 ALTNNVTMVMGLIKIYIIILYKGFNLIVHMQQNFWN-VNY--D-----YHEKE 116  
 Ame1Or89 VVTNALSMMMITVKVCVIVVHKEEFINLIVYMQENFWN-DNYH--D-----LRERE 117  
 Ame1Or90 ALTNYMSVMMILLKICVIVVHKEEFINLILYMQRYFWN-VNY--D-----SREKE 114  
 Ame1Or142 LGKTVSLTAAVAQVTIKMIIICRLQQKRFQMLYSEMENFCKQAT--N-----EEKII 118  
 Ame1Or146 FCKAMSLSLAVVQVPLSSFCITQYDRFQRLIKEMKFCENAN--S-----YERQV 118  
 Ame1Or148 LFKCICLLICVFNIIQTIICFIKYDVALQRVVEEMMTCVKEEQ--L-----Y--KV 116  
 Ame1Or158 LFKCICLLICIFKHIIQTVICFIKYDVALQRVVEEMMTCVKEEQ--L-----Y--DI 116  
 Ame1Or147 FFKSICLLMGVQHVIVQTTICFIKYDSLQRVVEEMMTCVKEEQ--L-----N--EI 116  
 Ame1Or150 VFKSIALCVGLSQMIIQTAICFVYNTLQRVIEEMITYVKEAQ--Q-----YERKI 118  
 Ame1Or151 VSKCVAVSIQLTQVITQTIICFAKYDSLQHVIEEMIIICIKAAQ--Q-----YEEKI 118  
 Ame1Or152 VKSIALSVGLIQVIVQTTICFIKYDSLQHVIEEMIIYVKEAQ--Q-----YEKKI 118  
 Ame1Or154 VFKCICLSIGITQLIVQTLICFIKHNLSQRVVEEMVNCVKQAAQ--Q-----SEIEI 118  
 Ame1Or155 ISKICISIGVTQLIVQTLICFIKHNLSQRVVEEMMCKVKEAQ--Q-----NEIEI 118  
 Ame1Or157 LFKCICVALCLVQYVAQTIVCLVKYDTLQRVVEEMGLIEERR--M-----Y--EI 115  
 Ame1Or156 VAKSISIMVVLIIQLIVQTTICAIKHDTLQHIIEEMITYMKEAK--Q-----YEKKI 118  
 Ame1Or153 IFKNYHRFIDVAQNIQTVICFY-----IKEMKICIKETQ--E-----YEIEI 108  
 Ame1Or144 SMKTASEMAALLEVVLDLVLCKWNNSELQVLIIEVKSFLMAS--E-----YEIKI 119  
 Ame1Or145 SMKTASEMAALLEVALDLALFKWNNSELQVLIIEVKSFLMAS--E-----YEIKI 119  
 Ame1Or143 SLKTASEMAALLEVVLDLILCKWNNSELQVLIIEVKSFLMAS--E-----YEIKI 114  
 Ame1Or1 VIAAQIFSLLAIIKFWTIIINREIRFWLMEMEIQYRDVECE-----EDRL 125  
 Ame1Or3 VIAAQVFSLLAIIKIWTILINRNEIRFCLMEMEVQYRDVECE-----EDRL 130  
 Ame1Or6 LFMLLTNIINQVFKYVITLNRANELRIAIHEIKKDWTATPE-----DRF 117  
 Ame1Or7 LFMLLTNIINQVFKYVITLNRANELRIAIHEIKKDWTATPE-----DRF 117  
 Ame1Or4 LFMLLISTLNQVFKYVITLNRANELRIAIHEIKKDWTATPE-----DRF 119  
 Ame1Or5 LFKLLTNTLNQVFKYIITLNRANELAIAMNEIKNDWTATSE-----DRW 119  
 Ame1Or8 MLMPHINSIAQMTKYTIILRRTKELGKLLDEIKKDWSATQE-----NRR 121  
 Ame1Or9 MLMPLMSTIAQMTKYTIILRRMKEFKNLLDEIKKDWSATQE-----NRR 121  
 Ame1Or11 LLMPHLNSIAQMAKYTIILQRAKEFSKLLDEIKKDWSATQE-----NRR 119  
 Ame1Or12 LLMSHINGIVQMAKYTIILRRKTKELGKLLDEIKKDWSATQE-----NRR 121  
 Ame1Or10 LLMPHLNSIVQMIKYTIILRRQMKLIDKLLDEIKKDWSATQE-----NRR 121  
 Ame1Or14 MMIPQVNGYLQCKYSLVLRWTKLRLVLLNEMKEDWLNTEE-----DQL 121  
 Ame1Or15 ILIPLINGYLQCRYSLVLRWTKLRLVLLNEMKEDWLNTEE-----DRL 122  
 Ame1Or13 MFVPHMNGITQVSKYTIILRRQIKEFNIIILKEVQRDYSLATDK-----NMW 113  
 Ame1Or16 LMGPINCSMQFFKYTIILWRRKEIQEGLHAIRHDWIQATEE-----ERL 124  
 Ame1Or17 LMPPIINCSIQCFKYTIILWRRKEIQEGLYAIKHDWIKATEE-----ERL 124  
 Ame1Or18 LGSALSFFLMAVMKYCVFIIREDDIRKCVELIENDWKNVRYQ-----EDRK 132  
 Ame1Or19 LGSALSFFLMAVMKMCVFIIREDDIRKCVELIENDWKNVRYQ-----EDRK 132  
 Ame1Or22 LFGPLSFCVMAFLKYHLLILHKDNISECIKRIEWDWKNITYS-----KDIE 133  
 Ame1Or24 LFGPLSFCVMAFLKYHLLILHKDNISECIKRIEWDWKNITYS-----KDRE 125  
 Ame1Or20 QFGPLIFCMMAFVYKYYLIFHKTDIRECVERIKWDRNITYA-----KDRE 131  
 Ame1Or25 MIGPLSFFLMTFMKYLLLLHENDIREGIECIWDWKNMKHQ-----EDRN 126  
 Ame1Or29 MVGPLSFFVMTIMKYFLLFHENDIREGIERIEWDWKNVKHQ-----EDRN 127  
 Ame1Or30 MIGPLSFFAMTLIKYFLLFHEENIRKGIHEIWDWKNVKHE-----EDKR 127  
 Ame1Or21 FVSLMSFCMLSITKYHLINIHKDDVRECVKRIEWDWKNISYS-----EDRE 125  
 Ame1Or23 FVSLMSFCMLSITKYHLINIHKDDVRECVKRIEWDWKNISYS-----EDRE 125  
 Ame1Or35 MIGPFSFCIMAAIKYVLLSRGSHIGKCIEDIRVDWFRVSSHN--C-----LEDRK 131

AmelOr27 TLGPVSHWFVSTVNYTALLMKSKDIRYCFEHMEADWQTIKRM-----EDQQ 126  
 AmelOr28 VLGLSLAHWFVGTMYNTTLLLRGKEIRLCVEHIRTWQTVTRE-----EDQQ 127  
 AmelOr33 VLGLPLSHWFIGGINYTTLLLRKKEIRYCIKHVQRDWRIVTRM-----EDQQ 128  
 AmelOr34 VLGLPLSHWLVGGINYTTLLLRNKEIRYCIEHMQRDWEIVTKT-----EDQQ 128  
 AmelOr32 VLGLPLSHWFIGAINYTTLLLRKKEIRYCIEHMQRDWRIVTRT-----EDQQ 127  
 AmelOr31 VFGPLSHWFIGGINYTTLLLRQKKEIQYCVHEMQTDWKIVNRA-----KDQQ 127  
 AmelOr36 SLAPISYILGGGLNYAVLLLRKNDIRYCIDRIEADWKVITRM-----ADRQ 127  
 AmelOr37 SLAPISYIFGGGLNYAVLLLRKDDILYCIHEMETDWKITITRM-----TDRQ 128  
 AmelOr38 SLGPISYCFGGGLNYAVLLLRKNDIRYCIDHIETDWKVITRM-----TDRQ 128  
 AmelOr39 SLAPISYCFGGGLNYAVLLLRKSDILYCIHEMEVDWKAITKT-----ADRQ 128  
 AmelOr47 SLGPISYCFGGGLNYAVLLLRKNDIRYCIDHIETDWKVITRM-----GDRQ 127  
 AmelOr48 TLGPISYCFGGGFNYAVLLLRKNDIRYCIHEIETDWKIKRM-----EDQQ 127  
 AmelOr40 TLGPISYCFGGGLNYAVLLLRKDDIRYCIDHIETDWKAITRT-----GDRQ 127  
 AmelOr43 TLGPISYCFGGGLNYAVLLLRKNDIRYCIDHIETDWKAITRT-----GDRQ 128  
 AmelOr45 TLGPICYCFGGGLNYAIIILLRKNDIRYCIHEMKADWKAITRT-----DDQQ 127  
 AmelOr41 MTGPIIYICIGGGLNYAIIILFLRDDIRYCIHEIETDWKITITRT-----GDRQ 127  
 AmelOr42 MTGPIIYICIGGGLNYAIIILFLRDDIRYCIHEIETDWKITITRT-----GDRQ 127  
 AmelOr44 MIGPISYCFGGGLNYAVLLLRKNDIRYCIDHIETDWNAITRT-----QDRQ 127  
 AmelOr46 TIGPLSHWVIGGFNYAVLLLRKNDILHCIEHIRVDWNIITKK-----QDQQ 127  
 AmelOr49 ILGLPLTHWLVGGFNAYAVLLLRKDDIYYCIKQICADWNIITKK-----QDQQ 127  
 AmelOr50 IFGPLSHWCIDGFNYAIIILLRKNDILHCIEHLRADWKLITRT-----QDQQ 127  
 AmelOr26 AIGPTSHWLMGELNYCCLLMRAKEIVYCIHEIKYDWKTVRRA-----RDRE 131  
 AmelOr53 AFGPAGFCLSSSTIKYCYLGLKGSFIERCIEHMRKDWMMVQDP-----NHRT 134  
 AmelOr54 ALGPVSVFVSSSTIKYCYLGLKGSFIERCIEHMRKDWMMVQDP-----NHRT 134  
 AmelOr52 LLGPVGFCLSSSTIKYCYLGVKGVFFEQCIKHVKNDWKMVQDP-----SYRI 132  
 AmelOr51 FLGLPLTFCLSLFKYSYLGKSSSELGHCIEKHVEKDWKMLQNE-----DHRV 132  
 AmelOr55 FFGLIFFSFMMLKMYWALTRKPEIEHCIEQVQSDWKQVKME-----NDRE 130  
 AmelOr57 FLGLIFFSFMMLKMYWALTRKPEIEHCIEQVQSDWKQVEIE-----NDRE 130  
 AmelOr56 ILGLIFFSFIISLMKYWALTIHKPEIKYCIHQVQSDWKQVEME-----NDRE 130  
 AmelOr58 ILGLIFFSFIISLMKYWALTRKPKIKLCIEQIQHDWKQVEFE-----RDRK 130  
 AmelOr59 LFGLLSFCLVALIKYWTLLYRSTGLVFNFTSAVKNCVEQIWIWDEQVELY-----EDRE 131  
 AmelOr60 LFGLLMFCSIALMKHWALAYRKPPIKNCIEQIQNDWEQVKLY-----EDRE 131  
 AmelOr61 LVGLLSFSLIALIKYWTLLYRKPRIKDCIEQIQNDWEQVELH-----EDRK 131  
 AmelOr63 ALILINAGLAVTKVICFHVRSGLVSNFTSAVKDYKELNSE-----ENRV 119  
 AmelOr64 ALVILINGGILAVAKVMCFHIRPLGLISNFTSAVKDYNELNSE-----ENRV 115  
 AmelOr66 ALLLINCILAVAKVMCFRIRPVLVSNFSSAIKDYNELNSE-----ENRV 115  
 AmelOr65 ALLLINCILAVGKVMCFRIRPVLVSNFSTGLVFNFTSAVKDYNESNDE-----ENRM 115  
 AmelOr67 ALLLINCILAVAKVMCFRIRPVLVSNFSSAIKDYNELNSE-----ENRV 115  
 AmelOr114 MG--NITITLSLLKTIAFWINGKPLKSLNLCMANDWIKVTSKT--E-----QE 99  
 AmelOr115 I---NIPIVFALIKQIVLRYKALTELLGEMLADWSGPIGDQ--D-----RE 113  
 AmelOr118 L---TNSNTLVFIKLIVIFWFKRTFYEILMSMKEDLNNNKHSA--T-----ENKR 105  
 AmelOr164 I---TCSNTLLLLKFI I IWFHFRVLFESLII IAEDWDNCKFEW--N-----ME 109  
 AmelOr163 L---TNSNTVTFFKLIIILWFNYRTIHNLTIVFEDWNNRALTD--K-----K-KQ 109  
 AmelOr165 I---AMPFSLVFIKLVITWLNRYGVFNCDILSTMEKDCQKYAVID-----INN 109  
 AmelOr166 I---CLPHSLVCIKLFTAWTQNTLIRNILLSMEEECQKYAIMD-----TDN 109  
 AmelOr167 T---TLPYSLLCFKLISFWTKREIFENILIGMYHDWTNAFATD--F-----IVED 111  
 DmelOr35a GMPTYLILVEAQFRSLHILLHFELKQKFLIFYANIYIDPRK-----EPEM 126  
 DmelOr74a GLPTYLILVEMQIRCFQLAWHKDRFRALLQRFYAEIYVSEEM-----EPHL 127  
 AgamOr3 GTAELMFESNAFFGMLMFSFQRDNYERLVHQLQDLAALVL-QDLP-----E-LGE 132  
 AgamOr5 GTAELIFEWNVLFGLMLFSLKLDYDLYRYKDISKIAFRKDVPS-----Q-MGD 113  
 AgamOr13 GTAELIFQSNFSCGMFWLFLNRHKLAQFITQVTRFSLTVFRE-SPP-----A-VVQ 112  
 AgamOr15 GTAELIFQNSFSCGMFLLFLNRHKLAEFIQHARSFSQTVICA-SPP-----A-VVR 112  
 AgamOr17 GIAELFFLTNSFSCGMFLLFLNRHKLAEFIRHVTRFSLTVLQE-SPP-----A-VVQ 112  
 AgamOr16 GLAELFFQTNRFVGVLLLVLYSDSIFELVRQSEFFAKKVLSE-TSP-----VAE 111  
 AgamOr55 GLAELFFQLNFTGLLLVLVSSKQLQCLVRVGGQTIADDEVFQC-AQT-----D-MRQ 113  
 AgamOr18 GYTELILETNVVFAGMLQLYLCYNHFVPLVDELRAFAAIVFQDNQPM-----L-LRT 113  
 AgamOr14 SMAELAFVGNVFCGMALWSVYNSFRQFIEQVIRLTKYLYRDHHL-----QTVRE 114  
 AgamOr51 SMAELVFIGNVFVGAMLLWTEYDAFRQFIEQVNSLTKHFYREDP-----LKE 109  
 AgamOr12 GLSELIFFTNI FVGLFCFIAQHRPYRELLNAIESFVNIVYRTSSQOPE-----SLSER 117  
 AgamOr19 GLSELIFFTNVYVGGFFCFISQHRHYRDLLNAIDSFVDVYPTAAHPSD-----SPSEQ 117  
 AgamOr20 GLSELIFFTNVYVGGFFCFISQHRHYRDLLNAIDSFVDVYPTAAHPSD-----SPSEQ 117  
 AgamOr21 GLSELIFFTNVYVGGYCFVQHRHYRDLLDEIQSFVNIVYPTSSQP-E-----SPSER 116  
 AgamOr50 GLGELIYFTNVYVGGFFCFVQHRHYRDLLDEIQSFVNIVYPTSSQP-E-----SLSER 116  
 AgamOr29 LGSELAFVSYLYCQILGLYFRHSYLYRLVLDLQTCINKQYSESID-----Q 109  
 AgamOr53 LIAELVFVYVYLCQIMALYCRRLYRLVDMQLQCIDIPYSEQIE-----S 109  
 AgamOr30 VGAEIVYSTYMFLQIALYARRSDLYRLIDTLQKCVENPYDDVR-----A 109  
 AgamOr46 SIAEGMFSFNTTTFIMLPLKMDNFEGLLQNLQRFTQIVTVEEDY-----K 110  
 AgamOr47 SIAEGMFSFNTTTFIMLPLKMDNLEDLLKNLKRFTIEIVIFNEDY-----E 110  
 AgamOr48 SVSELIFAALCYLTI I I LAIKSEPFRAVIRKMEQALELFRDKQDQ-----CSQ 116  
 AgamOr49 STAEIFFCYNNYLMMAIFAIRRPQFPEQLIGTVQLLFDKERKFTTD-----SSR 127

AgamOr61 SAASVIASVWGFTTEGLTRICLIELRYGTLASIMSFLNERS-YRQQD-----S 127  
 AgamOr62 AAANLLGALGLCSGALLRLLLEIQNYPTVHRLQQFLNDRY-YLRED-----P 132  
 AgamOr63 STANILGVMWFFSVVILRVAILEWYPLMLRMQTFLLNNHTSYQRTD-----P 129  
 AgamOr60 ALFNVVGTIWMAGAFVRRLLFDR--GLLTRLLEQFLNDRS-FREDE-----P 125  
 AgamOr75 LAMDMLCMLSFLVSIILRGTCMRQYLAHINALDRLERRPT-FRIGT-----P 126  
 AgamOr76 LALDMLCMLSFLVSIILRSTCMRQYLSHIDALDRLERRPT-FRVGT-----P 126  
 AgamOr78 LAMDMLCMLSFLVSIILRGTCMRQYLAHIDALDRLERWPT-FRVGT-----P 126  
 AgamOr77 TFAEQFNQFGGILLTLRSVIAIVGSFPRKDTAEFINACK-FHHLN-----E 113  
 AgamOr79 TFAEQFNQFGGILLTLRSVIAIVGSFPRKDTAEFINAYK-FHHLN-----E 113  
 AmelOr99 CIPHFIASSISAVKLLNLHFNQRQYNILFHFVTKKQQLKSTYELNAL-----DETIM 130  
 AmelOr101 CIPHFIASSISAVKLLNLHFNQRQYNILFHFVTKKQQLKSTYELNAL-----DETIM 130  
 AmelOr102 GLPHFIAATISAVKILNVFYFRENFDKLFQFVTNEWNKLLNNELHIL-----DKTII 130  
 AmelOr103 GLPHFIAATISAVKILNIYFYFRENFDKLFQFVASEWDKLLNNELHIL-----DNTII 130  
 AmelOr104 CLPHLIAAATSVMKLLNIHFNRENFKKLFELTKWEKFEELNNQFHVLF-----EEITI 130  
 AmelOr98 CLPNLCASLSSVVKILNVHFNRENFNKLLFVVKWEDELKLN-ELHIL-----EEITI 129  
 AmelOr100 CLPSLGVCIAMFVKLQNIYNNSENFKLLFTFVAKQWYQLKLNNEIRIL-----EEIIM 56  
 AmelOr97 IPIVFIATISCAIKLLNHRINKNFDFLMSKEWEMKNDNRNQCIL-----DEFTK 83  
 AmelOr105 NIPQVITVIASMIKILNIYFNQFNKLFYSLAQDWKLLKESKEELIML-----DKFTQ 130  
 AmelOr109 QLPYINAGIVTLFKQYNYILNEDKLRRELLHDIVSDRLIERSKEELEIL-----EMYSR 118  
 AmelOr110 QIPYLNAAIICLFKEYNYVLNENKLRRELLNDIISDRLIRRSKKEELEIL-----ELYSR 118  
 AmelOr111 QLPYLDVGFVLLFKQYNYILNEDKLRRELLNEIISDRLIKRSKEELEIL-----EIYK 118  
 AmelOr108 QLPYLNALFILLFKQYNYILNEDKLRRELLNDIIFDRLMVRSSKKEELEIL-----NMYSR 118  
 AmelOr107 QIPYIDLGFALMLKQYNYILNEKLRRELLHNIISDRLVKSKEEEEIF-----EYFK 118  
 AmelOr112 NLPYSIASFGTFVKMGNYFLDETKLTTILNHLIFEDWATIKSKEEYEIF-----YKYSR 118  
 AmelOr113 QSGIATAIFLSLLKEANYILNATKVKSLFNDMYMDWRMDRPKKEFEIM-----STYAQ 118  
 AmelOr106 QIPFLIAAAILLMIKYNNFIINEQKFKELFVSIINDWQKKKTHEEEMIL-----EKYAD 115  
 AmelOr122 TLSAIFPLLLFFIRYIYYITMFPYVEILFDNIRTEENLLQDTTEIQIQ-----TKYLD 118  
 AmelOr125 TLSAIFPLLLFFIRYIYYITMFPYAKLLFDDIRTEEYLLLEDETEIQIQ-----TRYLD 118  
 AmelOr123 TFSMTFPVFLCLRYIYCLTLFSYAKVLFDDICIEHLLQDTTEIQIQ-----TKYLD 116  
 AmelOr126 TFSMTFPVFLCLRYIYCLTLFSYAKVLFDDICIEHLLQDTTEIQIQ-----TKYLD 116  
 AmelOr127 TFSMTFPVFLCLRYIYCLTLFSYAKVLFDDICIEHLLQDTTEIQIQ-----TKYLD 116  
 AmelOr128 TFSMTFPVFLCLRYIYCLTLFSYAEALLFDNVHTEHLLLEDTEIQIQ-----TKYLD 116  
 AmelOr129 TLSTTFPTLLYCLRYIYCLTLFSYTELLFDNIRTEEHILQDMTEIQIQ-----TKYLD 116  
 AmelOr133 -----MEENIIQDSIEAQIR-----TKYIS 20  
 AmelOr134 ILSTTCPLIIISLRYICFILFFPMIKYLFHHMRMEENIIQDSIEAQIR-----MKYIG 116  
 AmelOr131 ILSTTCPLIILLRYISFIIFFPMVKLLFHHICVEENAVQDLIEIQIR-----MKYIG 116  
 AmelOr132 ILSTTCPLIIISLRYICFILFFPMIKYLFHHMRMEENIVQDSIETRIR-----TKCIN 116  
 AmelOr135 ILSITCPFIIIVSLRYVCFIVFPPTIKLLFHHMRVEENIVQDLIEIQIR-----TKYIN 116  
 AmelOr136 IFSTTCPLIIVLFRYIGLILFFPTIKLLFHHMCMEEAMIQDSIEAQIR-----RKYID 116  
 AmelOr138 -----MRMERNMIQDSTEIKIR-----KKYIN 22  
 AmelOr130 ILSITCPLVLLRYIGSIACFPPTIKIVFKHIRTEENIVQDSIESQIR-----MKLID 116  
 AmelOr137 ILSLIFPLTIIIVRYVSCVIFFSMIKLLFHHMRMGNNIIQDSTEIKIR-----KKYIN 115  
 AmelOr139 -----  
 BmorOr20 HVYLTIFMFTVTLSRGFSLTWPNPNYHKVVKKFIEMHLLYFK---DNS-----EYAMK 132  
 BmorOr3 HVYLTIFMFTVTLSRGFSLTWPNPNYHKVVKKFIEMHLLYFK---DNS-----EYAMK 132  
 BmorOr18 HVYLTIFMFTVTLSRGFSLTWPNPNYHKVVKKFIEMHLLYFK---DNS-----EYAMK 132  
 HvirOr6 LMYLIFLIGIVDTLTVVCLTFSEKFRVLAKDFLTKTHLFYK---DRS-----KHAME 137  
 BmorOr23 HTIITVLMNVVSLRSLILR-CFKKYDVVGQQFINKIHLYHYR---NDS-----EYAMK 132  
 BmorOr16 HTIITVLMNVVSLRSLILR-CFKKYDVVGQQFINKIHLYHYR---NDS-----EYAMK 132  
 BmorOr4 HTIITVLMNVVS-SRLILR-CFKKYDVVGQQFINKIHLYHYR---NDS-----EYAMK 131  
 BmorOr5 HTIITVLMNVVSVSRLILR-CFKKYDVVGQQFINKIHLYHYR---NDS-----EYSMK 132  
 BmorOr22 HSYITALMTIVIFSRSVVT-ALGRYRKIARYFVSSLHLYHYK---DIS-----EYALQ 138  
 BmorOr17 HSYITALMTIVIFSRSVVT-ALGRYRKIARYFVSSLHLYHYK---DIS-----EYALQ 138  
 BmorOr1 STFITVMMNLVTCRSRTALVMLFERYLVLTGRFITVMHLFNFQ---KNS-----DYAYK 134  
 BmorOr1a STFITVMMNLVTCRSRTALVMLFERYLVLTGRFITVMHLFNFQ---KNS-----DYAYK 134  
 BmorOr1b STFITVMMNLATCSRTALVMLFERYLVLTGRFITVMHLFNFQ---KNS-----DYAYK 134  
 BmorOr19 AITITPLGALVGIIKAESAK--AECYVNLKMFMDKVHIHSIYRKNENN-----EFVKK 133  
 BmorOr15 AITITPLGALVGIIKAESAK--AECYVNLKMFMDKVHIHSIYRKNENN-----EFVKK 133  
 TcasOr5 LVASFVNYMG---AVIFCHKHKNKFLSNIEKCALLQQLRN-----K 117  
 TcasOr7 FVWTFVYVWVWIPMALGFIALTVWYFEDILHHDARINENLTLN-----IE 120  
 HvirOr4 FMENIASVDTSIGGQYSRVTERKLCGIIILAILIFS-VLIADDFTFYAL-----QAKKL 122  
 BmorOr13 YLHRIHKINSDLGTYSSSLTDKMLHRLTIGMLLITSVIIVTDFTFVY-----LADLN 171  
 DmelOr10a TLCPGTSAVTLKMLFLRFRQDLSIMWNLRLGLLFDPNWER-----PEQRD 124  
 DmelOr33c NLTMSLTVCACSLKHVAHLYHLPQIVEIESLIEQLDTFIASEQ-----EHRY 113  
 DmelOr7a SAQVAIDAVILPAKIVALAWNPLLRRAEHHLAALDARCREQ-----EEFQ 132  
 DmelOr22c AFCPGTTKAVCVLKLWVFFRSNRRWAELVQRLRAILWESRRQE-----AQR 121  
 AgamOr1 ALFVLMTQVTLIYKLEKFNYNIARIQACLRKLNCTLYHPKQR-----EEFS 125  
 AgamOr4 NCNIYGGSMFFAYDVATFQAFIQELKSLSVLCSHSYRLKYKLTRFN-----RRAD 124  
 DmelOr47b DLVWISGMALVFTKIFYMHLRCDEIDELISDFEYNNRELPHN-----IDE 140  
 AmelOr73 KFSLCISVFGVSLKVANLFLQRGKIINIMNSLTKENSIPRDE-----QEE 110



AgamOr68 TQSLICTGAALMIKYFTMIRNPAPVRELSGNIETQMYTKYQEMS-----PEYP 115  
 DmelOr59a NLTTTFATCTACSVKCLLYAYNIKDVLEMERLLRLLDERVGP-----EQRS 116  
 DmelOr23a SLSLTVTSTLSNLMKFCMYAQLTSMKMEVQSLIGQLDARVSGESQSE-----RHRN 115  
 AgamOr31 CLGPTFTAYLGLVRQYNLLHRKSELWSIVDEFAALKHSLQSS-----EIR 109  
 DmelOr2a NLTITITDIVANLKFANVVMVRKQLHEIRSLRLLMDARARLVGD-----PEEIS 121  
 AmelOr62 AFVMDLSAVISLAKLFI LRNSKHAWVLINSVVEDWSAVHDSRHEYIM-----TEYLK 123  
 AmelOr121 NLAYSIPLIITTIKFI VSSKKKVL SLIVNMVAKDWAKLKT DH-----EKD 123  
 AmelOr140 GKKITFYIYLYVYTTLFVYLLLP TIPLI IDFITSSNHSQKR N----- 113  
 TcasOr12 ASFLLFTNLVQCCKIYTFANHGKVKVNLVYSMNRSDFKPNNLA-----QYW 121  
 AgamOr8 LAPCMGFTALS FVKIMTIKLTETKLT DMLHRDLALFPSTVALQ-----QRY 125  
 BmorOr9 LAPCICIGVLSVLKILALTA KRQKIYELTQNL ECLHKIILNDTR-----KTE 112  
 AgamOr40 DELFLTLITTSIYSILVPLSLYLRLYESNIRQLYEF SQRHFRK-----RSAAG 129  
 TcasOr63 SLLYFFTHFTFLCKLLNFQYYSKDLIEIENFLTDPIFYGYSF-----EQLD 118  
 TcasOr4 TLLFCMTQAAF LFKLVNFLYHNKTM LRIESILKNPILNCLDQ-----FEKN 111  
 TcasOr13 NTDRFVTFSDVVVLPICIIIGVPIASHNIEKTIKYFSFLRQFD-----CCL 130  
 AgamOr24 CIATFGFCCQAIMKIYSFII TRQRVVDLYEINHRYYQHMMGQS-----IAVKR 108  
 AgamOr54 SFETLLYVGIACIKMYVFIKNRKLILQMHQY MIDFFDHFHGD R-----EQDE 133  
 AgamOr23 HHGPSAQGLAKIEAFTCEPELN DLHLYNVARFKAPPRFPEVDEA----- 113  
 AgamOr64 TYGSFVIYMLWAILI WVLNHYEHMCELRLFFKNPTYQE QSD-----WAHR 138  
 DmelOr82a CLSVVFTNMLTVIKISTFLANR KDFWEMIHFRKMEHQSSHIPRYR-----EGLD 113  
 AmelOr116 GLTILMNSTYA AKVIYIICRYERIKNLVDITNSEIFNRDNDK-----YKH 124  
 AmelOr160 NITLSFPTLIVLKA VMFRMMHLVLP LLLTVVKRDVNEGLYRS-----AEERR 118  
 TcasOr10 IFDTGKPI SLCYGESEGLETPWVEFYIVLQSV EVTIIFLGITG----- 108  
 TcasOr26 VIETTAGQFVLYLTLFTLTYRKGILEIYADLSNF TKFGKPYN-----FDK 101  
 AmelOr117 IGCVLTTITQVLFKMIYLIARREKTYSLYKIRNLWNSSNDSK-----ER 119  
 AmelOr120 TGSTLLTILLAALKSIVWIFNRK KLEFFIEFMLTDYWKI IETN-----VFE 110  
 BmorOr7 VMFLLLCHITSVAKQLV FYLDADRIDCL IATLDDPSYNEMSH-----QR 115  
 AgamOr6 QAPCIGYCTIGV LKMVILARGRNTIAELVGLFR AKWTS AIVTG-----AHWA 123  
 DmelOr45a NFVAVFMQGSQSTFKFLVMMAKR RRIGSLIHR LHLKNQAASATP-----NHLE 110  
 DmelOr67d ALAMVGSVAVQGLTKLLV TANNASHMRE VQNTYEDIYREYGSKG-----DEYAK 123  
 DmelOr83c ASLMTGGLFHGLGKFLTCL LKHQDMRRLVLYSQSIYDEYETR GD-----SYHRT 119  
 AmelOr162 PLAFRVEYFVDVDKYYYLLLVHSSIGTLGYTVIVLAIN SIIIVYVLHE-----CGLCE 125  
 HvirOr3 FITGMTAAVIGAFSLLALLEGTMSVEAWLP FDP----- 52  
 TcasOr20 NFVALSALFAVIYVSVCF INRKHKIRALIADLALFET FSSKA----- 108  
 AgamOr11 NAATTLFSTTIFRIIFFYFHRARFTSIIKAAHDGIERILKDG---W-----TDEQS 126  
 DmelOr56a SYATAVQYFAVSIAMFNAYQRDKVISLLRVAHSDIQNL MHEAD-----NREME 126  
 AgamOr28 VLVPI TEILLTNGKMI ICNVKRGKI INLINQVQVAWDEGAKSEHLEIQ-----TLITT 143  
 AgamOr58 MSFVTMTGAMCIVIWLSLAAFRDLTGTVKFLQHRQCTIHRQS----- 122  
 AgamOr59 VSGGITVLVAVLLMLIFTVHYDAFQQ LGTFLNDRAFARDHP-----LATG 132  
 DmelOr1a ALMHGLQMVSSLLKMAIFLAKSHDLVDLIQQIQSPFTEEDLVG-----T 115  
 DmelOr13a NCCTTFMGV LNFVRLIHLRLNQRKFRQLIENFSYEWIPNSS-----KN 122  
 AmelOr161 CALICTAFYLCVVRLLVYSFHQKDMLYV VNTMKEDWLS SSSDQD-----RL 119  
 AmelOr141 SVAMIISIVG GHARYTILLWFRDICTQMLNVCEIFWSNLKPH-----EKK 114  
 AgamOr52 LLCGQFALTSIVARYMLLLRSYAQLQPIQRHLNEQRFLRGHPR-----AHA 101  
 AgamOr36 YGNTFGVLTMM LARMLVVRWYLP HVRQLMEYLRQRGR IEPAP----- 129  
 AgamOr25 CFSTSAVALEIAIRMGLLVHQR ELRNETIEIIRQQQKV TARFH----- 107  
 AgamOr45 VLSVAGCGWQMF FRMYFYLFQQDR CRQIVQEV RDQRTVY GADR-----NPRME 119  
 TcasOr3 ALRDIGNHVS LAYKAFNYFIMRRDILKLMETLQHGNHYH YEDCGDFQPK-----LIVDE 129  
 DmelOr88a NPPVLSIT IYFSIRGLM LYLKRKEIVEFVNDLDRECP RDLVSQ LDMQM-----DETYR 132  
 AgamOr22 SVSFAVS AFELMLKINGMVYRRKQIAAMLRTVLSDRSSLNGP-----IEAV 124  
 DmelOr49a QGLHFFYMLSSQLKFI TFMINRKRLLQLSHRLKELYPHKEQNQ-----RKYEV 123  
 DmelOr85f RYATLVTYI INSDTKFATV LQSAIQSLNSKLAELYPKTT LDR-----IYHRV 122  
 AmelOr119 MCILAITVFAD IYTNMDNLSITTDG CIFAGIFVVI FKAMNLQ-----IQLES 134  
 DmelOr63a TSI AKMWFYFLFAHRQIYELLRKARCHELLQKCELFERMSDLPVIKEIR-----QQVES 138  
 DmelOr67b AVLLTFQLSVGVV KMFHFQNKVESC SQLVFSTETGEV LKSLGLFQLDLPRK KELLSSVSL 139  
 BmorOr21 HSTVIGPF IGGFVKVALMYKRRQAN ELVSEINRDHLAYNGLKG-----EDREI 120  
 BmorOr11 NGTIAMLSFTTTFKY SLLLYLQKSLNRLIAKIDMDYEIAKGLP-----PQEKA 119  
 BmorOr12 VIVIGISNPMAYIFCIN FIRNRNEIKDLFYHLAVVLKIYYND-----VE 125  
 AgamOr33 ASCLMVNVR IYGILVQEFTIFEDGLRLIFYSTQC SLGTLFQRR-----NA 115  
 HvirOr1 LIGQMFMVAVLCVNKLAKSNVSLNGTSPVIFVYTTCVTMMLFFQVARRWPALVQHISKAED 139  
 HvirOr5 VDRTLKCRMTFVAGLMTFFSIFEHAMSILSSVGLDCPPSLILKR----- 98  
 TcasOr1 NFRHSVRSVFFLSEIFGLVNLKYRETYFRLSKTKT FCTLVTA----- 103  
 TcasOr2 AIIIMILSGC IIFTEGIWICSLIHRKKIVKFLDGIMAFDIQLK-----QV 124  
  
 TcasOr16 ALKKMRLLYIIIIWTSFSAIAWGTITFVGDSVHN IKDPENENLTIT EP-----IPRLLV 182  
 AmelOr2 AVKKM RILLLAVIGTTVLSAISWTTITF IGDSVKKVIDPVTNETTYVE-----IPRLMV 179  
 AgamOr7 ALAKMRKLLVLMATTVLSVVAWVITFFGGSVKTVLDKATNETYTVD-----IPRLPI 179  
 AaegOr7 ALAKMRKLLVMVMTTVLSVVAWITITFFGDSVKNVFDKETNETYTVE-----IPRLPI 164  
 DmelOr83b ALAKMRKLLFVLVMLTTVASATAWTTITFFGDSVKMVDHETNSSIPVE-----IPRLPI 181

BmorOr2 SLSKMRLLYFICGMTVFSVISWVTLTFFGESVRMIASKETNETLTEP-----APRLPL 182  
BmorOr2a SLSKMRLLYFICGMTVFSVISWVTLTFFGESVRMIASKETNETLTEP-----APRLPL 182  
HvirOr2 ALTKMRLLYFICGMTVLSVISWVTLTFFGESVRMITNKETNETLTEV-----VPRLPL 182  
AgamOr56 --LEIQTILGHVTKSTHKLTKYYCSTVSNCAAYGLFP-----ML 151  
AgamOr57 --LEIQTILGHVTKSTHNLTKYYCSTVSNCAAYGLFP-----ML 151  
AgamOr26 --LEIQTILGHVTKSTHKLTKYYCSIVSNCAAYGLFP-----ML 151  
AgamOr27 --PEIQGILGHVTKSTHNLTKYYSVVNFNCAAYGVFR-----ML 151  
HvirOr9 ----REDLIDKHVLMMLTSSITKKISYILIGMGLLMFALAP-----AF 160  
HvirOr7 ----KEEIIASETGFLNKVINLVLYVLNCSMIVVDMTP-----MI 136  
DmelOr85b -----LPMYLGTCRSRISLIYSLLYSVLIWTFNLFC-----VM 148  
DmelOr85c -----LDRYLRSCRSRISITYALLYSVLIWTFNLFS-----IM 147  
DmelOr85d -----IGHHLSGYSRYSKFFYFGMHMVLWITYNLYW-----AV 169  
DmelOr67a -----VKSWLKRCHIYTKGFGGLFMIMYFAHALIP-----LF 161  
DmelOr67c -----LPDFEKTMRKVINIFTFLCLAYTTFFSFYP-----AI 160  
DmelOr92a -----VSFYRKHMMNRVMTLFTILCMYTTSSFSFYP-----AI 165  
DmelOr69a -----CQHYFDMAMTIMRIEFLFYMILYVYNSAP-----LW 156  
DmelOr69b -----IHYYQEKYTRHINTFIFHTSAVVYNSLP-----IL 156  
TcasOr6 -----LHKFLRRFFLLYTGNLALCTQFAVTAFFDD-----QFKSV 129  
TcasOr11 -----PHKLLKAFFFAKYLIMILMALQYILRKFSVK-----NGKPL 146  
AgamOr41 -----LQWYTRLFQRAVDGYTLVFIGTVAAGLL-----PL 147  
AgamOr42 -----LAKYTDLFCKSVQLYTVCVLSVVVLTLM-----PF 153  
AgamOr43 -----LLLLMNRICLLRKLITSQFSISILTLMT-----PV 148  
AgamOr44 -----LLLLMNRICLLRKFITLQIIGCILVLSLN-----PV 148  
AgamOr66 -----VARIIDLLVLVTKAISVLYTSSLFIFSLY-----PA 146  
AgamOr67 -----ITRIIDLLVMTKAISVLYTSSLFIFSLY-----PA 146  
AgamOr72 -----LRRTGRILWIVYRMSASYIFAAVAFGLY-----PA 147  
AgamOr73 -----LRRTGRILWIVHRLMSASYIFVAVAFGLY-----PA 147  
AgamOr71 -----LRHTGRILWIVYRIMSASYIFAAVAFGVY-----PA 147  
AgamOr74 -----LRHTGRILWLVYRMSASYIFLAVAFGMY-----PA 147  
AgamOr70 -----LKQTYILWFFFRFVTTLATIVLAFGLY-----PL 147  
AgamOr69 -----LQRTGRILWFIFRFMRTSVSSAAFGLY-----PV 147  
TcasOr9 -----MEKSSKLSDKFVYWFNCIASSLMPMIAS-----LLGG 34  
TcasOr18 -----MDQASELSDKLAYVWVSSLAVGSVVPVLA-----IATG 139  
DmelOr83a -----MAGSYRMSKLLWIKTYVYCCYIGTIFWLALP-----IAYR 172  
DmelOr85e -----SHAAFRMSRNFVWVWMSCLLGVISWGVSP-----LMLG 181  
TcasOr24 -----EVNRKLEWCTRMVFGYCVFSGSVFYNLVK-----ILAI 149  
TcasOr25 -----KVRKRMMDLYAHLIFFYSMFGSFVYNDK-----IILI 149  
TcasOr19 -----KVNKRLDFLVKVFVSYAIFGAVVYNLMR-----IIEI 114  
TcasOr22 -----KRSRRLDFYAKLYSYCYFGIVYISLLQ-----IIEI 143  
TcasOr23 -----KRSRRLNFYAKLYSYCYFGIVYISLVQ-----IIEI 143  
AmelOr168 -----TISTTKMLEKPSRIYIIVNVISIIWISSP-----LIKL 147  
AmelOr170 -----IIDTVKPLEMPLKIYVIASVASLMIWILSP-----LIKL 147  
AmelOr169 -----TIGTVKPLEKPLRVYIIASVGLMIWASLP-----LAKI 149  
DmelOr65b VEYQTGKRWFVMAFFLATSWSFFLICILLLLITSP-----MWHVHQQNLPHFA 159  
DmelOr65c VDYRTAKRWYFTLAFFLASSWLVLFCIFILLITSP-----LWVHQQILPLHA 159  
DmelOr65a KEVQETKRLHFLFMALIIWFSFLILFMLIKISTP-----FWIESQTLPHFV 190  
TcasOr17 LVEPSIKFWRQFYLIIFRVLCYCTFFWSSYPILDKW-----TKDHRLPFL 161  
TcasOr21 LIQPSLKFWKLLYNLHSLVGGATLFWILFPIVDK-----KEKRLPFL 159  
TcasOr56 IVNDAITMCNRQGYVFTLVFLIIGARLLYASLANWPKHNYFDGNVTVIIVNTKEMPYT 184  
TcasOr15 IVTSAINMCKRQGYVFTLVGVGTGGQLYAALANLPYDKHNYFDGNVTVVVNTKOMPYA 182  
AgamOr9 IPLASARKKSTIFWVLYFMFSDGLVTEWLVISLLL-----TTLIVP 175  
AgamOr65 MPLVSARKKSTIFWVLYFMFVGLATEWLVISLSL-----TTLIVP 179  
BmorOr6 TIFSHSR-TVKNLYKGVLTGFTLVQWTVLSLIG-----SERTLPFNE 156  
BmorOr10 ILILKAR-KIKRLCMFFLVNAVTTCSLWAVIPLLDI-----SSKMLPF-K 155  
AgamOr34 LQQRRLAVFNRWYAYIFVSH-MAAFGTGS---HLL-----SAEYRMPFF 156  
AgamOr37 LHRKGVASINRYLYPLVTN-LAVASSCL---YLL-----QDDYRLPYF 168  
DmelOr94a FWRREQRFKWFYIYILISLGVVYSGTG---VLF-----LEGYELPFA 164  
DmelOr94b FWQONQRNFKRIFYWYIWGSLFVAVMGYIS---VFF-----QEDYELPFG 161  
DmelOr71a MWRFEHRRFNRFVFMFYCLCSAGVIPPVIVIQ---PLF-----DIPNRLPFW 157  
DmelOr46a IFAAACERSRKLDFYGLSFAALSMILIP---QFA-----LDWVSHLPLK 156  
DmelOr46b MLELDRVAVRMRNSYGIMSLGAASLILIV---PCF-----DNFGELPLA 156  
HvirOr8 VIEKAKKFNKLYWNIILAVSFACASNLFPPPIAHF-----ILGTLELVP 157  
BmorOr8 IIQKNNAYKTYWKLAYILSNFAYSSQVLGPLIVKLV-----IWKTKLELP 159  
AmelOr68 IQKSFDKNIGSITIYYTVMVEFTVFCMIVSS-LVTD-----FRNQRLAYE 155  
AmelOr69 MRDKCDKQARLNAIYYAILVELSVMSLSFGG-LLK-----AESKLPYR 153  
AmelOr70 IRTKFNKMNERTSICYTILVLVSATWIFVRS-FFTD-----FKKRKLTFR 155  
AmelOr71 IFLKFEKLTWNTLGYFILLMSSSLCILMGS-LLAN-----FKIRKLAFR 155  
AmelOr72 IHTKYNKLEKVSIFYTTLQNVSLVALIGAT-LITD-----FKKKKLTFE 155  
DmelOr19a IIMAG-IERAEFIFRTIFRGLACTVVLGIIYISASS-----EPTLMYP 159  
DmelOr19b IIMAG-IERAEFIFRTIFRGLACTVVLGIIYISASS-----EPTLMYP 159

Dme1Or33a YFNQNP SRVARMLSKSYLVAAISAIITATVAGLFST-----GRNLMYL 154  
Dme1Or33b FFNQNTREANFIWKSFIVAYGLSNISAIASVLFGG-----GHKLLYP 156  
Dme1Or22a TVHRYVAMGNFFDILYHIYSTFVVMNFYPFLERR-----HAWRMYP 174  
Dme1Or22b IVHRHVALGNFCYIFYHIAYTSFLISNLSFIMKRI-----HAWRMYP 174  
Dme1Or42b KIHLVVARSNHAFLIFFTVYCYGAGSTYLSVLSGR-----PPWQLYN 171  
Dme1Or59b RIHNMVARCNYAFLIYSFIYCYGAGSTFLSYALSGR-----PPWSVYN 172  
Dme1Or59c IFHKMVARVNLIVILFLSTYLGFCLTLFTSVFAGK-----APWQLYN 174  
Dme1Or98a EVHQGVVRCNKAYLIYQFIYTAYTISTFLSAALSGK-----LPWRIYN 169  
Dme1Or42a QIHRAVLSNRIFFFFMAVVMYATNTFLSAIFIGR-----PPYQNY 174  
Dme1Or85a QVHRAAALCNRVVVIYHCIYFGYLSMALTGALVIGK-----TPFCLYN 172  
Dme1Or43b KVRDMVATITRLYLTFVVVYVLYATSTLLDGLLHHR-----VPYNTYY 171  
AgamOr2 VLERYTRRGRMLSISNLWLGAFISACFVTYPLFVPGR-----GLPYGVT 151  
AgamOr10 LVSTYTKRARFLSISNLALGAFISGCFVVYPLFTGQR-----GLPYGMF 152  
Dme1Or30a LVKETTRLSVLISRINLLMGCCCTCIGFVYTPIFGSR-----VLPYGM 157  
Dme1Or49b ILDQVNKVGKLMARGNLFGLMSTMGFLYPLSSSER-----VLPFGSK 151  
Dme1Or43a ILRRAEREARNLAILNLSASFLLDIVGALVSPLFREER-----AHPFGLA 155  
AgamOr32 RFVKCSELHAKLLRAYVIGTSIVLLLYELNAIVASIT-----LSLQON- 151  
AgamOr35 LFRRS GAFHAKLTKIYMTSALIVGWFIYLSAIVSGIS-----RSLAEG- 150  
Dme1Or47a ILNAANKQDQRMCTLFRTCFLLAWALNSVLPVLRMGL-----SYWLAG- 153  
Dme1Or98b IVTRESRRQFISAMYAYCFITAGLSACLMSPLSMLI-----SYHEQV- 155  
Dme1Or9a IIEVENQSDQMLSLTYTRCFGLAGIFAALKPFVGIIL-----SSIRGD- 165  
AgamOr38 YTNRITARDQITTKVLFHSSFITAILYGIIPYFMAY-----NWFQGGY 171  
AgamOr39 ITKQLTTLGQQFTFYLFLLMFFAACLYGVTPEFIMIY-----NRVQGGY 172  
Dme1Or24a YKKRFYTLATQLTFLLLCCGFCSTSTYSVRHLIDNIL-----RWTGK- 152  
Dme1Or45b AQRSYYLMVTRCGMLVFTLGSITTGAFVLRSLWEMWV-----RRHQ--- 164  
AmelOr74 LFGECQKFCRLWIIVSMISQS-SLAFYIITPIYENI-----GKNKSER 159  
AmelOr86 LFTKCRKFCFLWTLTVFSFTA-SLTFYIITPICANI-----GKNKSER 159  
AmelOr75 IITGCKKLCNFSIVLIIFCAQG-TCAGYMTPLIENI-----GKNESDR 159  
AmelOr84 ILAECKRICTIFVVVISFCAQG-TCTGYMITPIIANV-----GRNESDR 157  
AmelOr87 LLQNCKRISMLCITLINCAQG-TIVSYVLTPIVENI-----GRNHSDR 174  
AmelOr76 IMNKCQRTCNLYLVFVFTFFAQG-TVLGFILRPILVNR-----GKNESDR 159  
AmelOr85 IINTCKRYSTFFVCIFFTSQ- TVFSFVIRSLKENI-----GKNETER 161  
AmelOr88 IIDDYRRLCSFLVCSFTFFAQG-TVVCVFITPVFVNN-----GKNESDR 160  
AmelOr91 IVFGCKRKCTFFICFFTFFTA-TIVSYIAGPIIGNI-----GKNESDR 158  
AmelOr92 IVIGCNQKCTFFICFFTFLLIA-TTASYMVIPLVNI-----GKNESDR 155  
AmelOr95 IVLNCKRKCTFFCSSLTFTTLA-TVVSVINPLVANI-----GRNESDR 156  
AmelOr93 MIG-CNZKCTSSSVSRFSRWRPLLLTSSVRLLVKNI-----GKNESDR 144  
AmelOr77 IFTNCRQCIIFVCFLTFSTKG-TLVCYIVSPLVENI-----GKNQSER 160  
AmelOr94 I IADARQLCVYFVCFVFSFQS-TVFSYMFMPMISNI-----GKNESDR 159  
AmelOr96 IVKDKRITAYFVCILTFSSLS-SIFTYMFRLPLTNI-----GRNETDR 159  
AmelOr79 ILDDCKKICIFFISSVTTIGIC-AIISYLMTPFVAQS-----GSNESER 159  
AmelOr83 ILDDCRKTCIFFISSVTTIGMC-TVMSYLTTPVITQS-----GSNESER 159  
AmelOr80 ILDDCRKTCIFFVSCVTIMAIC-AMICYIMIPFIAQS-----GKNESER 159  
AmelOr81 ILDDCRKTCIFFVSSVTMAIC-AMICYLMIPFIVQS-----GKNESER 159  
AmelOr82 ILNDCRKTCTIFFVSLTMMVIC-AMISYLIIPFIAK-----GNNESER 158  
AmelOr78 ILDDCRKTCIFFVSSLTTIGIC-AMLSYLMTPFAIRS-----GNNESER 159  
AmelOr89 ILENCKRTCAFFVSLVTAIGIC-AILSYLATPLIVQT-----ASNNSER 160  
AmelOr90 ILNGCKKTCAFFVSTVTFIGIC-AILSYLTTPFTARI-----GNNESER 157  
AmelOr142 LQRYVDRYKYFHSFYILWSFLT-----TIFVIC-----GPLYTVQ 153  
AmelOr146 FQGYAKSYATFYGVSAIWFYWC-----ALIVVV-----GTLFISD 153  
AmelOr148 LCIYVKKCNIFYGGTIVLTYGA-----ATVFVL-----GPTFLPI 151  
AmelOr158 LCMYVKKCNIFYGGTIVLIYGT-----ATVFVL-----GPIFLPI 151  
AmelOr147 MCAYVAKCNIFYGGTIVLIYTT-----ATVFIL-----GPTFLPI 151  
AmelOr150 FHKYIKKCYTFYGCIIICMYLT-----GLAFII-----GPAFSPA 153  
AmelOr151 FHKYIEKCYTFYACSITCMYLT-----ATAFII-----GPAFSPA 153  
AmelOr152 FHKYIEKCHIFYGCSIACIYLT-----ATVFVI-----GPVFSSA 153  
AmelOr154 FYKYIEKCHIFYGSSIAFSYLA-----ATAFML-----GPAILPI 153  
AmelOr155 FSKYIEKCHIFYGSSIIFSYLT-----STAFML-----GPIILPI 153  
AmelOr157 LRAYASKCNTLYGASIASIYVC-----GTSFIF-----APLFLPN 150  
AmelOr156 IQKYVSKCYILYGSIIISYLT-----TIFIL-----GPIFLPI 153  
AmelOr153 FQKYIAKFKTVWGCNITCMYLT-----ALAFII-----GSVFIST 143  
AmelOr144 LQGYINRYKFFSTVSMGYILP-----ASSFIL-----MPLFSAQ 154  
AmelOr145 LQGYINRYKFFSTVSMGYILP-----ASSFIL-----TPLLSDK 154  
AmelOr143 LQGYVNRYKFFSTVSMGYIST-----AISFSL-----MPLFSAQ 149  
AmelOr1 VMMNTAKIGRFFITIVYLSLSYTGALPYHIILPLIS-----ERIVKED 167  
AmelOr3 VMMNTAKIGRIFTIVYLFYGGALPYHVILPLIS-----ERIVKAD 172  
AmelOr6 IFVTNSRIGQRIMLIIAIVITYSSGLGYRMVLP LLK-----GKIVLAN 159  
AmelOr7 IFVTNSRIGQRIMLIIAIVIMYSSGLGYRMVLP LLK-----GKIVLPN 159  
AmelOr4 IFVMNSRIGQRIMLIMAFIMYISGLGYRMVLP LLK-----GKIVLPN 161  
AmelOr5 IFTANSKMGQKVMLIVAVTVYSSGLGYRMVLP LLK-----GKIVLPN 161

AmelOr8 IFSERASIEHKLTMIVAITTYGGGFLYRAILPLSK-----GRIVLPN 163  
AmelOr9 IFSAKASIEHKLTTVIAITTYGGGIFYRMILPLSK-----GRIVLPN 163  
AmelOr11 IFSERASIEHKLTTVIVVTMYGGGFFYRTILPLSK-----GKILLPN 161  
AmelOr12 IFSTRASIEHKLTMVVVVTMYGGGFFYRAILPLSK-----GKIVLSN 163  
AmelOr10 IFSRTASVEHKLTSIIAITTYSGGFFYRMILPFSK-----NKIVS-N 162  
AmelOr14 IFRAKASFGHRVMSMIAIVTYSAGLGVRTILPLSK-----GRILLPN 163  
AmelOr15 IFRRKASIGHRLMSVVAIIMYSAGLGVRTIPLSK-----GRILLPD 164  
AmelOr13 IF'TTRAYIGHKMMIAIAIAMYSSGVGYRMILPFLK-----GRILLPD 155  
AmelOr16 IFRSKMKIGRRVVLIAAFTMYGGGLCYRTILPLLK-----GTVITAD 166  
AmelOr17 IFRSKAKIGRRVVLVVAFTMYGGGLCYRMILPLLK-----GTIVTAN 166  
AmelOr18 IMLENASFSRRLIVICGTFMYGGVIFYIYIALPLTRA-----KIVEEGG 175  
AmelOr19 IMLENASFSRRLIVICGAFMYGGVVIFYIYIALPFTRA-----KVVEEGG 175  
AmelOr22 IMITNANFGRRLVICTFFMYSGFAFYIYIAVPI SVG-----KILAEDD 176  
AmelOr24 IMITNANFGRRLVVICTFFMYSGFAFYIYIAVPI SVG-----KIPAEDD 168  
AmelOr20 IMIMYANFGRKLV MVCTFFMYSGFAFYIYIAVPI SVG-----RVKT--D 172  
AmelOr25 IMIEYANYGRKLVLICTFFMYSAFAFYIYLVLPFSVG-----KIED--G 167  
AmelOr29 IMITYANYGRKLAFICFFMFLCAFIFYFLIQPFGGG-----KIVD--G 168  
AmelOr30 IMIEYANYGRKLALISIFFVFLCAFVIFYVPI SVG-----KIRD--E 168  
AmelOr21 IMLMNAFGRRLIIVTTTTVYSGVFFFYIYIAIPMKIG-----KIPAPDA 168  
AmelOr23 IMLMNAFGRRLIIVTTTTVYSGVFFFYIYIAVPMKIG-----KIPAPDA 168  
AmelOr35 IMMENARIGRSLAIFCAGFMYSGGFFYTTVMPLCT-----KRTEIID 173  
AmelOr27 TMLKNAKFGRYVAASCAIFMQGGILCFCFVTILTTE-----TIQVONE 169  
AmelOr28 VMLKNAKFGRYVAASVSAAILQSGVNCXCMTISRTE-----LIQIGNE 170  
AmelOr33 VMIKHAKIGRYISMMCAAFMQGGVLSYCAVTAFASTQ-----TIEIGNE 171  
AmelOr34 VMIKHAKIGRYITMFCAAFMQGGVLSYCAVTAFASTQ-----TIEIGNE 171  
AmelOr32 IMMKHAKIGRYIAVFSAAF MQGGVLSNCAVTAFASTQ-----TIEIGNV 170  
AmelOr31 VMMKYAKIGRYIAALCAIFMQTGVLTICYVTAFASTR-----LIEIGNE 170  
AmelOr36 VMLKNAKIGRIISCCIVGFMQLGTFCTILGVFKR-----TIKIGND 170  
AmelOr37 IMLKNAKIGRIISCCILAFMQVSAVCFCTVLGVFKR-----TIKIGNE 171  
AmelOr38 VMLKNAKIGRIISCCIVGFLQIGTFCTILGVFKR-----TIKIGNN 171  
AmelOr39 IMFKNAKIGRIISCCIAAFVQISAVCFCTVLGVFKR-----TIKIGNE 171  
AmelOr47 VMLKNAKIGRIISCCIVCFMQIGTLCTILGVFKR-----TIKIGND 170  
AmelOr48 VMLKSAKIGRIISGCIAGFMHIGTFCTIVLGVFKR-----TIKIGND 170  
AmelOr40 VMFKNAKIGRIISGCIASFVQVSTICFGIVFGVFKQ-----KIKIGNE 170  
AmelOr43 VMFKNAKIGRIISGCVAGFLQLSTISFCTVFGVFKR-----RIKIGNE 171  
AmelOr45 IMLKNAKIGRIISCCFAAFMQFSTVIFCAVFGVFKR-----TIKISNE 170  
AmelOr41 VMFKNAKIGRIISGCIQSFLQFSTISYCTVFGVFKQ-----TIKIGNE 170  
AmelOr42 VMFKNAKIGRIISGCIQSFLQFSTISYCTVFGVFKQ-----TIKIGNE 170  
AmelOr44 VMLKNAKIGRIISGCIAGFMQLDSICFCTVLGVFKQ-----TIKVGNE 170  
AmelOr46 VMLKYAKIGRYIAAFCTAFLQGGVLTCTIALGAFKT-----TIKNGNE 170  
AmelOr49 VMLKNAKIGRYVAVFCTVFLQGGVFTCTLALGAFKK-----TIKVDNE 170  
AmelOr50 VMLRNAKMGRYIAAFCAIFMQVIIFFTCFILGIFKR-----SIHIDNK 170  
AmelOr26 LMIKNAKLRGFIACIAALCMHSGIMS YTVTITGFKKI-----TFQIGND 174  
AmelOr53 IMLKYATISRKLITMCAVFLYTGGM SYHTIMQFLS-----KGKNK-D 175  
AmelOr54 IMLKYATISRRLITICAVFLYSGGMSYHTVMQFLS-----KGKN--- 173  
AmelOr52 IMLKYATISRKLIIMCAVFLYTGGM SYHTVMQFLS-----KEKD--N 172  
AmelOr51 IMSRYVIMGRNLITLCAAFMYTGGLSYHTIMPLLS-----KRKV--E 172  
AmelOr55 LMLKYGIIGRNLTIYSILFMYISGIMYISFMQYAM-----RLQINND 172  
AmelOr57 LMLKYGIIGRNLTIYSILFMYLSGIIYVSI MQYAM-----GSQINEH 172  
AmelOr56 LMLKYGILGRNLTIYSILFMYMSITYSIMSIQYAM-----GLQFNEH 172  
AmelOr58 LMLKYGIIGRNLSMYSIVFMYSGGIIYHTVMHYKL-----GSYVDEY 172  
AmelOr59 MMLKYGQMGRNLMIIICAMFYTGGTIFHTILQYKV-----GTFIDEY 173  
AmelOr60 MMLKYGQVGRNLTIIICAVFMYTGGIYHTILQYEI-----GTFIDEY 173  
AmelOr61 VMLKYGQIGRNLTIIICAVFIYTGGSIFHTILQYKI-----GTFIDEH 173  
AmelOr63 IVRRHAYMGR AACISLIFCSYVGTFLMIVP IVAGDK-----EEVINVT 163  
AmelOr64 IVRRHAYMGRVACASLIFCSYVGTFLMIVPMLAGDE-----EEVINVT 159  
AmelOr66 IVRRHAYMGRVACASLIFCSYAGSTFLMIVPMLAGDE-----EEVINVT 159  
AmelOr65 IMRRHAYMGRVACTSLISCSYVCTFLFITV PMLAGDE-----IQVINAT 159  
AmelOr67 IMRRHAYMSRVACASLISCSFIASSTFLMIVPMLTGDK-----KDIINVT 159  
AmelOr114 TMARIASITRNTIIKSTVMCHTVVAFYVFLRYISMKY-----NENK--- 140  
AmelOr115 TMLRNARLSRAISIVCSTLTLYFMLLAFVSLQVWSNAE-----NASSETDL 157  
AmelOr118 IIMDKSMLSSRISNFLISYFAITFFLYS-----GVAL-----VIFDED- 143  
AmelOr164 IMMQKAILSRYIAKMLLIIFICSIFMYAVSTFFGPDI-----GASHSD- 152  
AmelOr163 LMVDNTRLSRISNFLFGIYSVTCILYS-----ASIAL-----ISDDIDN 149  
AmelOr165 LISKTGQISFYTTTIVMSSYLVSAAFYITGTLAF-----QRTNS 148  
AmelOr166 LISKTAYLSYRLTSTIICTCVASTVCIYAGIFSH-----QEVNV 148  
AmelOr167 MIKKT-ELAYCSNLILSIYIAVFLYVGVFLELSD-----HDQENRS 154  
DmelOr35a FRKVDGKMIINRLVSAMYGAVISLYLIAPVFSIINQS-----KDFLYSM 170  
DmelOr74a FASIQRQMLATRVNSTVYLLALLNFFLVPTNVIYHR-----REMLYKQ 171  
AgamOr3 YLISVNRVDRFSKIYCCCHFMSATFFWFMPVWTTYSA-----YFA-----VRNSTEP 180

AgamOr5 YLVRINHRIDRFSKIYCCSHLCLAIIFYWVAPSSSTYLA-----YLG-----ARNRSVP 161  
 AgamOr13 HLTTQHDFIHKITRIYCIIVVMFAAHFYVLTPLLSTFYA-----FYG-----TVRNDNVT 161  
 AgamOr15 HLTTQHDMIHKITRIFCIIVVMFAAHFYVLTPLLSTLYT-----FYG-----TVRNKNAT 161  
 AgamOr17 HLTTQHDFIHKITRMYCIIVVMFAAHFYVLTPLLSTLYA-----FYG-----TVRNENAT 161  
 AgamOr16 YLTKMDTQVTKITKLYLTALLVPAFYSYSPIVATLWK-----YYN-----TYEN-DTV 159  
 AgamOr55 LLTSHHKRMHTWTRYCYLVILYTVSIFATAPICATFWS-----YVR-----AAHR-NTT 161  
 AgamOr18 NLTDLNLRIHKYTLCYCLYMCCVCTVYCVAPLGSNIAG-----YTAAMADTASNSSTT 166  
 AgamOr14 QLLQFNHRIHRYTNRYCFSMMLIVFYLVAPVITSFGV-----YFQSVWQSHHDTNDT 167  
 AgamOr51 HVLQFNLYLHRYTNRYCFSMMLIMFYLAAPVITSFVV-----YFQSLWKSZYHLANGT 162  
 AgamOr12 TLIKLNVKINQISVVYCYVVAFAFTYWIAPCLITYLS-----IHKEQDIAGNGTMNA 170  
 AgamOr19 ILIKFNVKIQKLSVVFWCWYIAVTATFYWLAPCLMTYRS-----IYMASVSVENGSVQS 170  
 AgamOr20 ILIKFNVKIQKLSVVFWCWYIAVTATFYWLAPCLMTYRS-----IYMASVSVENGSVQS 170  
 AgamOr21 TLIKLNVKINKISVLYCWYLAAGLIYWSTPCLMTYHS-----VLKAKAEYGPN--HP 167  
 AgamOr50 TLIKLNVKINILSVLYCRYIVVAAFYIYWMVPCVVYYS-----IHKAEVSMGNESIQS 169  
 AgamOr29 FVIKSNTKINKLSVTCKYFTIAYVLYCAMPPIASTVV-----YVRNQR-NKTAPEEE 161  
 AgamOr53 FLIRSNVKINQSSAAYARFFMVCVYVLYCTMSPLASGFV-----YIRNQR-NATGVQED 161  
 AgamOr30 FILITRDTINKSSVMYSKCFVAVCIYSIIMPFMATSAV-----VVRNRR-NQTGEREE 161  
 AgamOr46 QILISLNTTIHKFTKFFYIFTNGVVSITGSTIAGMLY-----TYYTKD-SEYSAAFP 162  
 AgamOr47 QILIRLNTAIHKFTKFFYIFTNGIVFAMTSSTIAGMFY-----TYYAKD-SEYSAAFP 162  
 AgamOr48 LIIEVNANIHRFSLGYAKLNLLYVLLFNVIPIINYPR-----YFLQWRMPEDNRTVE 169  
 AgamOr49 YVVYVNRQIMRYSRLYIIVQVYFLIFNLLPAIVTYS-----YFASS---GDGEPVE 177  
 AgamOr61 LVRQQRATLFGENNRIQLILVATMLMEAIWFMTTQLFS-----RDAFMLQVNGHVVD 180  
 AgamOr62 WARTERSKLYRHNNRFLVLSAISVLESCLFLARLLLT-----RPEFMLQYGGAVLGG 185  
 AgamOr63 WAVGRRARFYRRTNRVILTMVGINLAETVCFATNVMK-----LDEFMLQFRGAIVGG 182  
 AgamOr60 LVRAARQHVQVQNNRYLFAVCLTLVLEASIFSGTNLML-----QPEFMMLYQGHAVGG 178  
 AgamOr75 YADESRRNVALQNSRYLGVALVFHSLTVTVYVIQNMVR-----ENSFVKIITSFPIDL 179  
 AgamOr76 YADESRRNVALQNSRYLGVALVMHSLTVTMVIQNMVR-----ENSFVKIITSFPIDL 179  
 AgamOr78 YADESRRNVALQNSRYLGVALVMHLLTVTVYVIQNMVR-----ENSFVKIITSFPIDL 179  
 AgamOr77 RAEEIRAGSIHNAGRFLSTLLAVQIVTLIFWFVLTTELQ-----AHRQDVLLPIFIYLP 166  
 AgamOr79 RAEEIRAGSIHNAGRFLSTLLAVQIVTLIFWFVLTTELQ-----AHRQDVLLPIFIYLP 166  
 Ame1Or99 QGKKMAQLYRNTLFSFLILFLLVPLVSPILDIVHPLN-----QTRSR 172  
 Ame1Or101 QGKRMAKLYRNTLFSFLILFLLVPLVSPILDIVHPLN-----QTRSR 172  
 Ame1Or102 RGNRTAHLYSALLIALVLFLLIPLISPMLDVFLPLN-----ETRPR 172  
 Ame1Or103 QGNKMAQLYRSALLTALILFLLIPLLSPIILDIVLPLN-----ETRPR 172  
 Ame1Or104 KGSKMAQLYRNTLLSFMVFLVPLVPLIFPFLDIVHPLN-----ETRPR 172  
 Ame1Or98 QGSKIAHLRNTLLSFLILFLLVPMYFPILDMIDALN-----QTRSR 171  
 Ame1Or100 QGNKMAQIYKNTLLLSMTIFFVPLIFPILDIVYPLN-----ETRPR 98  
 Ame1Or97 QGNKFAEIKNVLLSALLLFLLLPLFSPFLDIVFPLN-----ETRQQ 125  
 Ame1Or105 YGSKLALLYRRTLLTFLVIFLFLPLCNPILDVILPLN-----ETRSR 172  
 Ame1Or109 RTTALCALYKVMVYSCAFMFLVIPTIPPILNIVAPLN-----VSRSR 160  
 Ame1Or110 KATTLCILYKVMVYSCAFMFLVIPTIPPILNIVAPLN-----VSRSR 160  
 Ame1Or111 RARVLSTVYEVSIFFCGFMFLIPIPIPLNIISPLN-----ESRGR 160  
 Ame1Or108 RATTLCIFYEVIVIFSAIMFIMPTIPPILNIIMPLN-----ESRDR 160  
 Ame1Or107 RAMFFCSFYEVSIYSCGFMSPLIFMPLINVMIMPLN-----ESRSR 160  
 Ame1Or112 RGLFITISYFLHIGVTETFMLILPMVPPILDIVPLN-----VSRKR 160  
 Ame1Or113 RGSFLAMFYFINAYCCSLLFLQVPWTARLLYMIKSON-----TSPPM 160  
 Ame1Or106 KSLFFILIVVNAVYFCTVFLFLLPLTPILLDIFLPLN-----ESRPR 157  
 Ame1Or122 ISSHIIYIFCCMTFAFIVAIIIFLVNPVILDLRNLN-----ESRIF 160  
 Ame1Or125 ISSHIIYIFCCMTFAFIAAAIIFLVNLIILDLRNSLN-----EFR-F 159  
 Ame1Or123 ISSHIIYIFCWLSFICVASTWIFILNPVILDVIMPLN-----KFR-L 157  
 Ame1Or126 ISSHIIYIFCWLSFICAAASCILILNPVILDVIMPLN-----KFR-L 157  
 Ame1Or127 ISSHIIYIFCWLSFICAAASCIFIVNPVILDVIMPLN-----KFR-L 157  
 Ame1Or128 ISSHIIIDIFCWMSFICVASTCIFMLNPVILDVIMPLN-----KFR-L 157  
 Ame1Or129 ISSHIIIDIFCWLSFICVAATWIFILNPVTLDVIMPLN-----KSR-I 157  
 Ame1Or133 DSRHMIEILWMAATITLYSILGLCPPII--FIILLN-----ESPIR 60  
 Ame1Or134 DSRHMIEIFLWMAANITLYSILGLYLI--FIMPLN-----ESPIR 156  
 Ame1Or131 NSRHMIEILLRVTFILTFLSIFLLYFVTMDFIMPLN-----EFHRH 158  
 Ame1Or132 DSCHMIDIFLWMIYAIFAFCIILLCPILDFIMPLN-----ESRIY 158  
 Ame1Or135 DSCHIIIDIFFWVACTNITLSSISLLYFITLNFIMPLN-----EFR-- 156  
 Ame1Or136 DSCYMIDIFFWMTYVGIACSILLCPITLDFIMPLN-----ESRTR 158  
 Ame1Or138 DSCHMINIFFZIIYGIAVLSIIFILYPMTLDFIMPLN-----KTRIH 64  
 Ame1Or130 DSHHIIINIFFWMTYTTIVIFIIYVSYPIILDFIMPLN-----ESRTH 158  
 Ame1Or137 DSCHMMNIFFWIIYGIAALSIIIFILYPMTLDFIMPLN-----RTRIR 157  
 Ame1Or139 -----DAVIAFFSISLLYPIILDFINSLN-----ESRTR 79  
 BmorOr20 THRRVHKISHFYTVFLKQVMIAGLTLFNVIIPMYNNYRQG-----NYASDRPA 179  
 BmorOr3 THRRVHKISHFYTVFLKQVMIAGLTLFNVIIPMYNNYRQG-----NYASDRPA 179  
 BmorOr18 THRRVHKISHFYTVFLKQVMIAGLTLFNVIIPMYNNYRQG-----NYASDRPA 179  
 HvirOr6 IHKKIHLISHLFSLWILFQMLSGLSLNFNIIPMYSNLAAG-----KYRKGGLQ 184  
 BmorOr23 IHTVVHKISHNMTYIFSFICIIFGTVTFNLTPIFNINIGSD-----AYKNRPD 179  
 BmorOr16 IHTVVHKISHNMTYIFSFICIIFGTVTFNLTPIFNINIGSD-----AYKNRPD 179

BmorOr4 IHTVVHKISHNMTYIFSFCIIFGTVTFNLTPIFNINIGSG-----AYKNRPD 178  
 BmorOr5 TYKAVHKISNMTYIFSFSIFVCVVTFNLPVFNINIGSG-----AYKNRPD 179  
 BmorOr22 THLLVHRLSHYYTVYLISLVVTGMLLFNITPLYNNISSG-----VFNSPRPE 185  
 BmorOr17 THLLVHRLSHYYTVYLISLVVTGMLLFNITPLYNNISSG-----VFNSPRPE 185  
 BmorOr1 LCTFVNRMESHFYTLVLFVFSMFGLGFLNLLPLYNNYVSG-----AFSDPYGP 181  
 BmorOr1a LCTFVNRMESHFYTLVLFVFSMFGLGFLNLLPLYNNYVSG-----AFSDPYGP 181  
 BmorOr1b LCTFVNRMESHFYTLVLFVFSMFGLGFLNLLPLYNNYVSG-----AFSDPYGP 181  
 BmorOr19 KVIQIERVSRFTAYFLVILIAINCLSWMLKPTLHNIK-----HFEEIMNK 178  
 BmorOr15 KVIQIERVSRFTAYFLVILIAINCLSWMLKPTLHNIK-----HFEEIMNK 178  
 TcasOr5 LGKKEHSFNKMAKILLTIY-TTKLSSMIVTVNDIVK----- 153  
 TcasOr7 ATKQDYIFRYCFYTGTFVYFYGSDFTILVLI TPVEKLYG----- 158  
 HvirOr4 DREWVVVTNYLGFYLLWFVVLILELQFAFTALSVRAR-----FSAVND 165  
 BmorOr13 HRQLLIAIMYWCYYCSYFIAHLLMQFVLI AALALSS-----LKL VNN 214  
 DmelOr10a IRLKHSAMAARINFWPLSAGFFTCTTYNLPILIAMILY-----LQNR YEDF 171  
 DmelOr33c YRDHVHCHARRFTRCLYISFGMIYALFLFGVQVISG-----NW 153  
 DmelOr7a LILDVAVRFCNYLVWFYQICYAIYSSSTFVCAFLLGQP-----PYA 172  
 DmelOr22c MLVGLATTANRLSLLLSSTGATNAFTLQPLIMGLYR-----WIVQLPGQT 168  
 AgamOr1 PVLQSMGCVFWMIFLWFVAIFTIIMVWMSPAFDNER-----RL 164  
 AgamOr4 IIAKVQTTTCMGAVTLFYWIAPISICAHYYRSTNSTEP-----VRFVQH 168  
 DmelOr47b EVLQWQRLCYVIESGLYINCFCLVNFSAIIFLQPLL-----EGKLPFH 185  
 AmelOr73 IIQRRNDNYARKVTIYCEILNESAVFFATVGGYKRFIN-----TR 150  
 AgamOr68 VVLKYGRVLYIAGHIMIGGYFGSLFI IWINPLIMYFKE-----GRVMLLF 160  
 DmelOr59a IYGOVVRQLRNVLYVFIGIYMPCALFAELSFLEKEER-----GL 155  
 DmelOr23a MTEHLLRMSKLFQITYAVVFI IAAVFPVFETELSLPMP----- 153  
 AgamOr31 IVQKYNRIDRFLAWAYLITAMSTGVLFVGVVALVLFSL-----EKSDW 152  
 DmelOr2a ALRKEVNIAQGTFRTFASIFVFGTTLSCVRVVRPDR-----EL 160  
 AmelOr62 KGRIVSLMILYLGYSAGFSFVKALPFGDILPFQMFQNS-----RNSMNP 169  
 AmelOr121 IMIRRARIARIINIFGYILICILIWLLMILPRFGITIR-----YVTNETDA 169  
 AmelOr140 FLFELDYGMDKQYFYIHSYIGTAIVANLIASCD----- 150  
 TcasOr12 IIVNEIKTSKII SKLFLACTLTCVSWAISPLLDKGRS-----DELRL 164  
 AgamOr8 GVYQYNRESQVVMKSFSLYMLLIMFNLPLVSMVAG-----YVSDGTW 170  
 BmorOr9 LVRKNLVLIKFITKYFFVLNAVLIFVYNFSSPVI IAYN-----YIVSNEV 157  
 AgamOr40 VHYISISSYRFTNKYQFWWIASCLLGTMHWAVYPILS-----QER 170  
 TcasOr63 IIAKIRSCAFISNAFRICCTFTCSFYCLVPFIDESR-----KKIL 159  
 TcasOr4 IIEKYMIRVKYLARLFRILCILTVSFYGLFPFIDEDPD-----HML 152  
 TcasOr13 QKQPPKTWKSFFVPIITIVFTATILLFDVAMWLTLIAR-----NQSIF 173  
 AgamOr24 VLCDNASLIYIVIKVTVLAYLLLVITAMSIPGLSSIF-----LADR 149  
 AgamOr54 LLVRTLNNTTLLSSLFAVCS SAPGLLFVG----- 163  
 AgamOr23 -LFHTATMCMVFI RIFAVAFSIVAIAIYSYAILMPLIEH-----EL 153  
 AgamOr64 IRAGNYRRWNWMLMFYLFNVINVSIFTLTNAHNRQFH-----FQTRGE 182  
 DmelOr82a YVAEANKLASFLGRAYCVSCGLTGLYFMLGPIVKIGVCR-----WHGTTCDK 160  
 AmelOr116 IISYYNWQGI FHHIAYQGFASICIFSYSCIPLQSAFSG-----KSKQL 167  
 AmelOr160 TVVWYNVAATLFTSSALSILFVPTLFYAKPIIGCLLS-----KYNNTL 163  
 TcasOr10 ---YDMVFLYYAGSVCIQFQMLKMAFAERKMNE----- 138  
 TcasOr26 RNKQLNQWSRWFVSVVLYFFVISVFAWPGIFTQSCEDLN-----VALNK 144  
 AmelOr117 PYEEFAYWARIFSIIIFYSSCMNVFTFSIAAAIDYFKFEYN-----ANNTEN 166  
 AmelOr120 YLQEYAIYAKNITKGYFFSMCNALLFFFSLPIIETLTK-----NENLN 153  
 BmorOr7 LLVDASRWASRFVWAYSGCAVVTCTLWIVFPIIYHVQG-----QTV 156  
 AgamOr6 VCEDTMRPAIRVTSVTALANVVMGIAFTILPIAEMIYT-----HHYTGRWNR 170  
 DmelOr45a KIERENQLDRYVARFRNAAAYGVI CASAIAPMLLGLWG-----YVETGVF 155  
 DmelOr67d CLEKRIRITWTLIGFMLVYIILLGLVITFPIFYLLILH-----QKVLVM 168  
 DmelOr83c LNSNIDRLGIMKII RNNGYVFAFCLMELLPLAMLMDG-----TRVTAM 163  
 AmelOr162 ILRESNMICKIFLKDSLDIYTLDKIMNQFIIVQGETR-----KLCGN 168  
 HvirOr3 -----  
 TcasOr20 VITETDKSVKFYTKLFIYGVIGNLCYGLLPILGYKKCHE-----SKSVHMT 155  
 AgamOr11 IVGSNRYLKR LAVVFWSCALVTANMCMCVSLVQYLTYE-----EGPPDG 171  
 DmelOr56a LLVATQAYTRTITLLIWI PSVIAGLMAYSDCIYRSLFLP-----KSVFNVP 172  
 AgamOr28 TAKKSKIFVIIYTTSFLLICVEYSSMPLFKLIYHSAVYG-----KQSNY 187  
 AgamOr58 -AARKALMDRVNRYLWLFYLNIAQVFFWINLLRNCSP-----LAVF 163  
 AgamOr59 IRDRWYRWSNGLILGPQCCIVLILLQTWISRQHLKHT-----MLVVR 175  
 DmelOr1a EWRSONQRGQLMAAIYFMM CAGTSVFSLLMPVALTMLK-----YHSTGE 159  
 DmelOr13a NVAAECCRMMVTFSIMTSLACLII MCVLPLVEIFFG-----PAFDAQ 166  
 AmelOr161 IYAEKTMFAFRLAKYFITTVAITIVMFSVPLEIYVIG-----NSDK 162  
 AmelOr141 IVQSYTRKTTRLTRWYLASCVLTI AFYAFVLFVGLSDFDQ-----SKDFEHMRN 162  
 AgamOr52 LRQQAFRTNNVLM LALMVYGVLFVVEASGLHWQEIFR-----MPDY 144  
 AgamOr36 ---DTHRLSYRRIVNIAITFQLIGLADRLVAGFSQTYR-----QELY 168  
 AgamOr25 -----KLISVTLHALAACYMSTMMFELIPIVSPNPR-----KSNL 142  
 AgamOr45 KLFRAGTKRMLLAYRVIHLMYGTSYFFQLGPLIMPDP-----HKCNLPL 163  
 TcasOr3 EKKEALKWTKYFLNFCNAICLSMFANGVFTFIFLSDKQ-----YVERNQR 175  
 DmelOr88a NFWQRYRFIRIYSHLGGPMFCVVP LALFLLTHEGKDTP-----VAQHE 175

AgamOr22 ICGKYQLARKLLLVTTLSYLTGAMLLIYPVVS GG-----LADR 164  
 DmelOr49a NKYYLSCSTRNVLYVYVFMVVMMALEPLVQSCIMYLIG-----FGKA 165  
 DmelOr85f NDHYWTKSFVYLVIIYIGSSIMVIGPIITSI IAYFTHN-----VFY 165  
 AmelOr119 VKKIIDKYHTRNKVMFFGFCVIGACLG FALLCFTPMEN-----GLPIRA 178  
 DmelOr63a TMNRYWASTRRQILIIYLYSCICITTYNFINSFVINLYRYFTK-----PKGSYDI 187  
 DmelOr67b ILLNNWMIIDRQVMFFFKIVCMPVLYYCVRPYFYIFDCYIK-----DKDTC EM 188  
 BmorOr21 AASSIRNCQIYCELGWTLIVMSCGLSFPVIAILLNIHS-----FTFKFDST 166  
 BmorOr11 TVLNYAKKGVIVSKFWLFTAFAITFCFLKAFIIMGYR-----FFIKN 162  
 BmorOr12 IEKSMVNKIKSYLSTYVFASTITILVSNGIIAFFQTINS-----DEPFLGI 170  
 AgamOr33 YPACHLSLQHGHHAWLRVCRVLSGLSDRLRTVQH GADR-----153  
 HvirOr1 MDPNFDCSLTRKCNITCAVLLILALLEHILSLLSAFAG-----ASACYTG 184  
 HvirOr5 -----YVLVSHGFIFMGQDYSEWFAMPLVIIS-----125  
 TcasOr1 -----LVYCSLAIFVLCELLIEGTTTILINVPS-----131  
 TcasOr2 VNYKKKKFQRMVVARYVYYATIFTITITATSSFVTIHN-----161  
  
 TcasOr16 KAWYPWDAMSGMPYYITLVFQIYYVFFSLAHANLLDSLFC SWLIFACEQLQHLKEIMKPL 242  
 AmelOr2 RSWYPYDP SHGMAHILTLIFQFYWLIFCMADANLLDVLFC SWLLFACEQIQHLKNIMKPL 239  
 AgamOr7 KSWYPWNAMSGPAYIFSFYIYQIYFLLFSMVQSNLADVMFCSWLLLACEQLQHLKGIMRSL 239  
 AaegOr7 KAWYPWDAMSGVPY-FSFYIYQAYFLLFSMCQANLADVMFCSWLLFTCEQLQHLKGIMRPL 223  
 DmelOr83b KSFYPNWASHGMFYMISFAFQIYYVLFSMIHSNLC DVMFCSWLI FACEQLQHLKGIMKPL 241  
 BmorOr2 KAWYPFKTMSGGGYVFAFYIYQIYFLLFSMALANLLDVI FCSWLI FACEQLQHLKAIMKPL 242  
 BmorOr2a KAWYPFKTMSGGGYVFAFYIYQIYFLLFSMALANLLDVI FCSWLI FACEQLQHLKAIMKPL 242  
 HvirOr2 KAWYPFNAMSGTMYIVAFAFQYVWLLFSMAIANLMDVMFCSWLI FACEQLQHLKAIMKPL 242  
 AgamOr56 FIVVKYAVTGSYDVPLSTPIEAKYFIPGLRTN-----FWVWLPVDLTLNAILELHG FAL 205  
 AgamOr57 FIVVKYAVTGSYDVPLSTPIEANYFIPGLRTN-----FWVWLPVNITLSAMLELHG FAL 205  
 AgamOr26 FIVVKYAVTGSYDVPLSTPIEGKYSIPGFRTN-----FWVWLPFNLAQNVVLQCHSFAV 205  
 AgamOr27 FIVVKYAVTGSYDVPLSTPIEAKYFIPGLHTN-----FWVWLPVTLGLNVLLEWHSLAL 205  
 HvirOr9 I IIPHYFKT--NEVKLEMPFIAYYFNEFDS-RIYPWVYLHQVWTACVAMIMVYGPDCFF 217  
 HvirOr7 MIAVKYYKT--NEFEMLLPYLDVFSFIPYEL-KYWPFAYIHQIWSECVLLDMAAADYLF 193  
 DmelOr85b EYWVYDKWLNIRVVGKQLPYLYMYPKWKHQDN-WSYYP LLSQNFAGYTSAAQIISTDVLL 207  
 DmelOr85c QFLVYEKLLKIRVVGQTLPLYMYPWNWHEN-WTY YVLLFCQNFAGHTSASGQISTDLLL 206  
 DmelOr85d YYLVCDFWLGMRFERMLPYCWPVWDWSTG-YSY YFMYISQNI GGQACLSGQLAADMLM 228  
 DmelOr67a IYFIQRVLLHYPDAKQIMPFYQLEPWEFRDS-WLFYPSYFHQSSAGYTATCGS IAGDLMI 220  
 DmelOr67c KASVKFNFLGYDTFDRNFGFLIWFPPDATRNNLIYWIMYWDIAHGAYLAGIAFLCADLLL 220  
 DmelOr92a KSTIKYYLMGSEIFERNYGFHILFPYDAETDLTVYWF SYWGLAH CAYVAGVSVCVDLLL 225  
 DmelOr69a VLLWEHLHEE-YDLSFKTQTNFWFPKWHG SALGFGMAVLSITVGSFVGVGFSIVTQNL I 215  
 DmelOr69b LMIREHFSNS-QQLGYRIQSNWYWPVQVQGSIPGFFAAVACQIFSCQTNMCMVMFIQFLI 215  
 TcasOr6 MYYYGEKESRSQIYDNFVFTLQVIYLYVGC FVVAGFDCFFFYLLGHAVTELKMLTISFSC 189  
 TcasOr11 AIAFGESKGLSPKVDHLYFVLHSTSTFVVLHAVTGFDRLFFFLIGHVLTTELKLVKKS YRL 206  
 AgamOr41 AIYLLSGDRVLPYGVVLPFVDPDSLGVYELNYIYQVSCI IWTPPGLVASVCMFLGLVLNI 207  
 AgamOr42 ALYLLRGERYLPGLIVLPFTAETDDFGFWCTLVVQLAYMYTGPFGIIPSONIYFAFV FNI 213  
 AgamOr43 AQYILKGERFLVYTIILPFTDPEITSHYLLNLVQY YLLIVGLAGFSAENVLILFVTSV 208  
 AgamOr44 IQYIIKRERVLVYAILLPFTDPEITSHYLLNLVQY YLLIVGLAGFSAENVLILFVTSV 208  
 AgamOr66 YMYFVVHVKVPIFPLYIPGINIYSAYGYGITNSFHMLIAVYGLFGALTSDIVFIMFVVHF 206  
 AgamOr67 YMYFVVHVKVPIFPLYIPGINIYSAYGYGITNSLHMVIAVYGLL GALTSDIAFIMFVVHF 206  
 AgamOr72 FYYFATGVVPLFLYELPFFDLSSSLGYAVT MCFQINLLAIGVLGAILSDVFVFMYAMYA 207  
 AgamOr73 FYYFATGKVMPLFLYELPFFNVSSSLGYAVT MCFQINLLAIGVLGAILSDVFVFMYAMYA 207  
 AgamOr71 FYYFVTGVVMPFLVYELPFCDLSSSLGYAVT MCFQINLLVIGVLGAILSDVFVFMYAIYA 207  
 AgamOr74 FYCFATGKVMPLFLYELPFCDWSSSLGYAVTICFQINLLAIGVLGAILSDVFVFMYAMYA 207  
 AgamOr70 FAYNVNGVVMPLFLYELPYDWTSTTIGYVNM MFQVNLVIGTIGAMLDFLYFMYAMYT 207  
 AgamOr69 IAYYTTGELMPLFMIELPYGWTTTIGLAMNMFQANILVIGTMGAIMSDFLFFMYAMYA 207  
 TcasOr9 NKNLPMVVWYPYDPNKTPYFHLTYIWEIFCISNLGLIYAVLDLVFPCIAIVLGGQFKILA 94  
 TcasOr18 NLEMPMPAWFPYDYNKSPVEITYLWQVFLITLAI IYGASDMFFPCITIIIGQQFKILA 199  
 DmelOr83a DRSLPLACWYFPDYTPQGVYEVVFLQAMGQIQVAASFASSGLHMLCVLISGQYDVL F 232  
 DmelOr85e IRMLPLQCWYFPDALGPGTYTAVYATQLFGQIMVGMTFGFGGSLFVTLSSLLQLGQFDVLY 241  
 TcasOr24 PSCKKS----RRINEVCGVAIPYVWFDTENWSIKLPLILHTFLV IIVDKVTLVLSLQV 205  
 TcasOr25 DKCKEA----RRINEVCGSAIPFWTPEFETEDLFTLTLVITYVLINIFVVVKVAMTVSVQV 205  
 TcasOr19 PHCKRN----RKIREVCGVFLWTPFDADYPPVVLVVASVVFIVVILIDKVTLLVSLQV 170  
 TcasOr22 PECRKIN-EEKGLSEICGMIVPFWAPFDIDWFLKQIFWFDQLLGIYII IKGGAAVSITT 202  
 TcasOr23 PQCRKMN-EEKGLSEICGMIVPFWAPFDIDWFLKQIFWLNQLLGIYII IKGGAAVSITT 202  
 AmelOr168 FQKDEFYHEDFVMPAVFSNQ-PFSTGVFISGVFLQ LFGGEYLLFRKISLDLYTMHLNLLI 206  
 AmelOr170 FQKDEFYEDFIMPAVFSKQPFNDVFCIGLIFLQLLGGEDTIRKISLDLYTILCLLI 207  
 DmelOr169 FRKSEFYTYDQVPAVISNE-PFPIGVFIGGVALQIFGSAYTLLRKVSLDLYTMHLILLI 208  
 DmelOr65b AFPFQ-----WHEKSLHPISHAIYLFQ--SYFAVYCLTWLLCIEGLS 200  
 DmelOr65c AFPFQ-----WHEKSIHPISHAFIYLFQ--TWNVMYFLTWLVLCIEGLS 200  
 DmelOr65a SWPFQ-----LHDPKHP IAYIIIFVSQ--STTMLYFLIWLGVVENMG 231  
 TcasOr17 AWYP-----YDSTKSPFYELTYIHQ--VVS IYWLVSASLNIDMLI 199  
 TcasOr21 GWYI-----VDTKVSPPYEIVYGFQ--FCSCCYMSALINIDTLI 197  
 TcasOr56 TWMP-----FDYNDSPLYETIFAFQ--IFSTTVYGYIGAADAVI 222

TcasOr15 TWTP-----FDYNDSPLYEIMFAFQ--IFSTTLYGFYIGAADAVI 220  
AgamOr9 VWPR-----VDHTTPYVWVLMVILYQ--YMAIVLNASFNISWDSL 214  
AgamOr65 WVPV-----VDHTTPYVWVLMVIFHQ--YVAIALNASFNISWDSL 218  
BmorOr6 MWVP-----TDISK-TPNYEITFVVE--LWMMVISAALFMSVDTIT 194  
BmorOr10 IWMP-----VSTGE-SPHYELGYLYQ--MITIYISAXLFLSVDSVP 193  
AgamOr34 PWFFG-----VPYWEDAHVAYYTICAYQ--SFGMYFHMLLNTAGDTQL 197  
AgamOr37 PWILG-----IEYGPTKRLNYGLLFAYQ--VIGMYLHMLINVAIDVQL 209  
DmelOr94a YYVP-----FEWQNERERYWFAYGYD--MAGMTLTCISNITLDTLG 202  
DmelOr94b YYVP-----FEWRTRERYFYAWGYN--VVAMTLCCLSNILLDTLG 199  
DmelOr71a MWTP-----FDWQQPVLLWYAFIYQ--ATTIPIACACNVMTMDAVN 195  
DmelOr46a TYNPL-----GENTGS--PAYWLLYCYQ--CLALSVSCITNIGFDSL 195  
DmelOr46b ML-EV-----CSIEGW--ICYWSQYLFH--SICLLPTCVLNLITYDSVA 194  
HvirOr8 ICNYG-----FLSEDFRQMFVPLVLYQ--GSAMMFDMLYSVNIDTLF 198  
BmorOr8 ICNYY-----FLNEELRHDFSGWYIYQ--SFGMYGHMMYNVNIDTFI 200  
AmelOr68 AWLP-----FNCSAPNYYYYIAYVHQ--IALIGTSLLNVCADVTI 195  
AmelOr69 MWLP-----YNYTS--LSAHIFIYTOQ--VVSLIVSAMIHVACDSFI 191  
AmelOr70 AWLP-----YDYS--ELLPFALSIAHQ--ATTSMFCSCQNIACDITL 193  
AmelOr71 TWLP-----YDYS--TASAFLLAFAYQ--VVVATVCTFACVSDTLY 193  
AmelOr72 AWIP-----FNYTA-SWFLFSLTFIHQ--CGCAVVTSTFGISIFDTL 194  
DmelOr19a TWIP-----WNWRDSTSAYLATAMLH--TTALMANATLVLNLSSYP 198  
DmelOr19b TWIP-----WNWKDSTSAYLATAMLH--TTALMANATLVLNLSSYP 198  
DmelOr33a GWFP-----YDFQATAAIYWISFSYQ--AIGSLLILENLANDSYP 193  
DmelOr33b AWFP-----YDVQATELIFWLSVTYQ--IAGVSLAILQNLANDSYP 195  
DmelOr22a PYI-----DSDE--QFYISSIAE--CFLMTEAIYMDLCTDVCP 208  
DmelOr22b PYV-----DPEK--QFYISSIAE--VILRGWAVFMDLCTDVCP 208  
DmelOr42b PFI-----DWHDGTLKLWVASTLE--YVMMSGAVLQDQLSDSYP 208  
DmelOr59b PFI-----DWRDGMGSLWIQAIFE--YITMSFAVLQDQLSDTYP 209  
DmelOr59c PLV-----DWRKGHWQLWIASILE--YCVVSIQTMQELMSDTYA 211  
DmelOr98a PFV-----DFRESRSSFWKAALNE--TALMLFAVTQTLMSDIIY 206  
DmelOr42a PFL-----DWRSSLHLALQAGLE--YFAMAGACFQDVCSDCYP 211  
DmelOr85a PLV-----NPDD--HFYLATAIE--SVTMAGIILANLILDVYP 206  
DmelOr43b PFI-----NWRVDRTOQMIQSFLI--YFTVGYAIYVATATDSYP 208  
AgamOr2 IPGVVDL-----ATPTYQVVFVLQ--VYLTFPACCMYIPFTSFY 188  
AgamOr10 IPGVNNF-----DSPQYEIFYITQ--LVLTFPGCCMYIPYTSFF 189  
DmelOr30a LPTIDEYK-----YASPYEIFFVIQ--AIMAPMGCCMYIPYTNMV 196  
DmelOr49b IPGLNEY-----ESPYEMWYIFQ--MLITPMGCCMYIPYTSLI 188  
DmelOr43a LPGAISMT-----SSPVYEVYLAQ--LPTPLLLSMMYMPFVSLF 192  
AgamOr32 KVCVFTP-----FRFPFDYQHPVIFALTFLHN--FDAMLVTVCTSVTVDS 196  
AgamOr35 RVHVFAPMAYSVRTRGRSRFHFPHNYQHPLMFALTFLFN--CDSIHMSIFIIGSVDT 208  
DmelOr47a HAPELPPFC-----LFPWNIHIIIRNYVLSFIWS--AFASGTVLPAVSLDTIF 200  
DmelOr98b NCSRNFHFP-----VYPWDNMKLSNYIISYFWN--VCAALGVALPTVCVDTL 201  
DmelOr9a EIHLLEPHNG-----VYPYDLQVVMFYVPTYLWN--VMASYSAVTMALCVDL 212  
AgamOr38 PLVKLLPFKV-----LPPFDSQDPTLFLVTLTIFL--NYASVPTITAMTSTDAL 218  
AgamOr39 PLVKLLPFKL-----ALPFDSONLFPFVVTTLFL--NYASAPTITSSQSDAL 219  
DmelOr24a DWIYETPFKM-----MFPDLLLLRPLPLPITYILV--HWHGYITVVCVFGADG 199  
DmelOr45b EFKFDMPFRM-----LFHDFAHMRPWFVVFYLYS--TWSGQVTVYAFAGTDG 211  
AmelOr74 ILPFK-----MWVDLP-LSVTPYIEIMFVIQ--LLAVEQIGIAYVCSDF 202  
AmelOr86 ILPFK-----MWVDFP-LSETPYIEIMFVIQ--LLTVQQIGIAYTCNDNF 202  
AmelOr75 ALPFN-----LWIDFP-VGLSPYFELLFILQ--ILCVYHVATCYICFDN 202  
AmelOr84 ELPFN-----LWVDLP-VGLSPYFELLFTVQ--ILCVYHVGVCYICFDN 200  
AmelOr87 VLPFN-----MWVDLP-LFLSPYIEILFVLQ--VLSLYHVGVCYICFDN 218  
AmelOr76 ILPFN-----MWLELP-LSITPYFVEMFFVQ--VVVYHVVCVCYICFD 202  
AmelOr85 IHPFN-----LWLDES-WYMTPYFEMVFIIE--ILSLYHVGVCYLYFDNF 204  
AmelOr88 IHPFN-----MWFDRS-LSLSPYIEIYTIQ--VLSAYEIGICYICFDN 203  
AmelOr91 VLPFN-----MWVNL-LSMTPYFEITFTLQ--VLSLYQIGVSYFCFDNF 201  
AmelOr92 VLPFN-----MWVNL-LSMTPYFEISFVLZ--VLSLYQIAVSYFCFDNF 198  
AmelOr95 VLPFN-----IWIDL-LLTITPYIEITFVLE--VISLYHIGVSYFCFDNF 199  
AmelOr93 ILPFN-----MWVNL-LNITSYFEITYTLQXFSLSLYHIGVSYFCFDNF 189  
AmelOr77 ALPFN-----MWVNL-LSTSPYIEIIFTIQ--VLSLYHIGVGYFCFDN 203  
AmelOr94 ILIFN-----MWLDLP-LSMSPYFEIYVIQ--ALCLYQVGCYLCVDNMF 202  
AmelOr96 ILIFN-----MYLDLP-LSISPYEIAIYTIQ--IAALNQAGSCYFCFDN 202  
AmelOr79 MLPFN-----VWITFPVTR-TPYIEIIFFIQ--AICLYYIGISSFCFDN 202  
AmelOr83 MFPFN-----IWINLPITQRTPYQIIFVQ--GVSYYIGISYFCFDN 203  
AmelOr80 MLPFN-----MWINLPISR-TPYQITFLIQ--ATCVYYVIGISYFCFDN 202  
AmelOr81 MLPFN-----MWINLPVSR-TPYIEIIFFIQ--AMCVYYVIGISTFCFDN 202  
AmelOr82 MLPFN-----MWINLP-LSK-TPYIEIMFLIQ--AMCVYYIGVASFCFDN 201  
AmelOr78 MLPFN-----MWLDMP-LSK-TPYIEITFLIQ--AMCVYYIGISNFCFD 202  
AmelOr89 MLPFN-----MWLKLPLSE-SPYELMFVYQ--IMTFYFIGISYFCFDN 203  
AmelOr90 ILPFN-----MWVNLPLSQ-TPYELLFLIQ--IITLYYIGICYFCFDN 200  
AmelOr142 TFPTH-----AIYPFS-VRRHLYKGLIFFHQ--SLVGFQVSSGMAIDTQI- 195



AmelOr146 PFPTN-----AEYPPF-VHFEPVRSIVFVQQ--ALVGFQCSAHLVCVNIFC- 195  
 AmelOr148 SFPWE-----TEYPPFQ-INDTSRN-IIIYIHQ--FFFTYQCAAHICLSLFG- 192  
 AmelOr158 SFPWG-----TEYPPFQ-VNYTTINVI IYAHQ--FFLVYQCAAHTCLSLFG- 193  
 AmelOr147 TFPWE-----TEYPPFQ-VNYTSRNF I IYMHQ--FFFTYQCAAHICLSMFG- 193  
 AmelOr150 SFPAD-----AEYPPFQ-INYKSIKVI IY LQQ--TLVGFQCTAHICLSVFG- 195  
 AmelOr151 SFPID-----AEYPPFQ-INYTSVKI I IY LQQ--TLVGFQCAAHVCLSI FG- 195  
 AmelOr152 SFPAD-----AEYPPFQ-VNSTSMKI I IY LQQ--SLIAFQ CAGHACLSIFG- 195  
 AmelOr154 SFPLE-----AEYPPFH-VNESLIT I IYMHQ--SLVSYQCSANVCVSI FG- 195  
 AmelOr155 SFPFD-----AEYPPFH-VNHSLVTI I IYIHQ--SLVGYQCSANVCASVFG- 195  
 AmelOr157 PPFPE-----TEYPPFH-VNTTTRIF I IYASH--VLVIFQGTAHMCLCMFG- 192  
 AmelOr156 SLPFY-----TEFPLS-LNNTAVY I IYFHQ--CFFAYQCSATVCLSI FG- 195  
 AmelOr153 SLSCD-----AEYPPFQ-LNYTLVFAIRYQS---FLSYQC-AYACADHX-- 181  
 AmelOr144 ELPAE-----GWL PFS-IEPLGIYCVVYVNH--IYCILQT-SFCIFVDFTI 196  
 AmelOr145 ELPTE-----GWL PFS-IEPLGIYCAVYVNH--VYCILQ TLSFCIFVDFTI 197  
 AmelOr143 KLPAD-----GWL PFS-TEPFGIYCI IYFNH--VYCILQT-AFCIFVDFTI 191  
 AmelOr1 NTTQI----PLPYLS---DYVFFVIEDSPI-YEMTFVLQ--IFISSIILSTNCGTYSLI 216  
 AmelOr3 NSTQI----LLPCPS---DYVFFVIEDSPT-YEITFVVQ--MFTSFLIMSLNCGIYSLI 221  
 AmelOr6 NVTIR----LLPCPT---YFTFFNELVSPY-YEMIFMLQ--ILAGVFLVYTVLSGTIGIS 208  
 AmelOr7 NVTIR----LLPCPT---YFTFFNELVSPY-YE I IFMLQ--ILAGFFIYTVLSGTIGIS 208  
 AmelOr4 NVTIR----LLPCPT---YFTFFNELVSPY-YEMIFMLQ--LLARFFIYTVLNSTVGIS 210  
 AmelOr5 NVTIR----LLPCPT---YFTFFNELVSPY-YEMIFMLQ--LLAGFFSYTVLNSTVGIS 210  
 AmelOr8 NVTIR----LLPCPG---YFGSLDEQVTPN-YE I IFTLQ--VLGGFVTHTA VCGIKSAC 212  
 AmelOr9 NVTIR----LLPCPG---YFGSLNVQITPN-YE I IFTLQ--ILGGFVIY TALCGVKSSC 212  
 AmelOr11 NMTVR----LLPCPS---YFGSLNEQATPN-YE I IFTLQ--VLGGF I IYTVLCGTKSAC 210  
 AmelOr12 NVTIR----LLPCPG---YFGFLDEQVSPN-YE I IFTLQ--VLGGFVIY TAVCGTKSIC 212  
 AmelOr10 NMTIR----LLPCPG---YFGSLDEQVSPN-YE I IFILQ--VFGGFVIY TAVCSTKSIC 211  
 AmelOr14 NTTKR----LLPCPG---YVFFNEQVSP I-YE I IF I I Q--VLGGLLTYTIMCGTIGMC 212  
 AmelOr15 NTTIR----LLPCPG---YI FFNEQITPN-YE I VFTLQ--VIGGLLSYTIMCGT TSMC 213  
 AmelOr13 NTTVR----LLPCPG---YMFNLQVTPN-YE I IFTIQ--VLGGFLNIYTTLCGTTGIT 204  
 AmelOr16 NITIR----PLPCPS---YF I I NEQQSPI-YE I L FVLQ--VMAGMAYAVISGTCGIS 215  
 AmelOr17 NTMIR----ALPCPS---YF I I LNEQQSPI-YE I L FVLQ--I IAGIAYAVISGFCGIF 215  
 AmelOr18 NLT YR----RLVYPF---PKVLLDARHSPI-NEICYTIQ--LLSGFVAHNITVAACGLA 224  
 AmelOr19 NLT YR----RLVYPF---PKALLDARRTPA-NELLYTIQ--LLSGFVAHNITVAACGLA 224  
 AmelOr22 NITFI----PLVFPF---SRF I IDTRY SFI-NEIVFSIQ--LIAGALMHTITTAACSLA 225  
 AmelOr24 NITFI----PLVFPF---SRF I IDTRY SFT-NEIVFCIQ--LVAGVLLHTITTAACSLA 217  
 AmelOr20 NLTFV----PLVFPF---SRF IVDTRY SPT-NEIVFSIQ--LMAGALMHGITSAA CSLV 221  
 AmelOr25 NLTFI----QLPFPS---SSL IADIRHSPY-NEIVLSVQ--ILTGVMHAITSAA CSIA 216  
 AmelOr29 NLTFI----QLPFPI---SIL IADVRDSPY-NEIMLSIQ--ILTGIVMNAIRSAICSVA 217  
 AmelOr30 NLTFI----PLPFPS---SKLIADM RQSPA-NEILFSVQ--VLSGV I IHAITATAV SIA 217  
 AmelOr21 NISFI----PTMFPF---PKY IADVRSPI-NEIVFFFQ--FMCGFLVHGVTSSACSLA 217  
 AmelOr23 NISFI----PTMFPF---PKY IADVRSPI-NEIVFLAQ--FICGFL LHGVTSSVCSLA 217  
 AmelOr35 NEIVR----SQAFP I---YRGLLDPR TSPS-FEIVQLMQ--CLAGFVIY SVTVGSCSLA 222  
 AmelOr27 TRVLH----VLPCAV---YKLLVNVE NSI-NIFMLCFQ--FVAAA IANSS TVGIFSLA 218  
 AmelOr28 TRIVH----VLPCAV---YKLL I DVTHSPN-SEL I IASQ--FLSGFIVNSSAVGIFSLA 219  
 AmelOr33 TRIVH----MIPCIV---YKLL IATDTSPT-NEIVIASQ--FVSGFIVNSSAVGAVSIA 220  
 AmelOr34 TRIVH----MIPCIV---YKLL IASDTSPT-NEIVIASQ--FVSGFIVNSSAVGAVSIA 220  
 AmelOr32 TKT I H----MIPCTA---YKLL IAVDTSPT-NEIVIASQ--FLSGFIVNSSAVGAVSIA 219  
 AmelOr31 TRIVH----MLPCPV---YKEL I SIDTSPT-NEIVLISQ--FVSGFIVNS IAVGAI SIG 219  
 AmelOr36 SMEIY----VLPSPT---YK--IPVD TNPG-HDIVLGFQ--YVAA YITSATV IAFSFA 217  
 AmelOr37 SMEIY----VLPSPI---YK--IPVD TNPG-HDIVLGFQ--YLAAY I TSATV IAFSFA 218  
 AmelOr38 SMEIY----VLPSPA---YK--IPVD TNPG-HDIVLGFQ--YLAAY I TSATV IAFSFA 218  
 AmelOr39 SMEI H----VLPSPT---YK--IPVD TNPG-YG I I LGLQ--FLTGY I MSATV IAFSFA 218  
 AmelOr47 SMEIY----VLPFPT---YK--IPVD TNPG-HAI I LGLQ--YLT SF I MSATV IAFSFA 217  
 AmelOr48 S MEMY----VLPFPT---YK--IPVD TNPG-HG I I LSLQ--YLT SYTSSATV IAFSFA 217  
 AmelOr40 SMEI H----VLPFPT---YK--IPVD TNLE-HSIVLGFQ--FLTGC I MSATV IAFSFA 217  
 AmelOr43 SMEIY----VLPFPT---YK--IPVD TNPG-HNIVLGFQ--FLAAY I MSATV IAFSFA 218  
 AmelOr45 SMEIY----VLPFPT---YK--IPVD V NPG-HNIVLGFQ--FLAGY I TTGTV IAFSFA 217  
 AmelOr41 SMEI H----VLPFPT---YK--IPVD TNLE-HGIVLGFQ--YLTAC I MTAT I IAFSFA 217  
 AmelOr42 SMEI H----VLPFPT---YK--IPVD TNLE-HGIVLGFQ--YLTAC I MTAT I IAFSFA 217  
 AmelOr44 SIRVY----ILPYPT---YK--VPVD TNPG-HS I L L L L Q--FLTTC I MSTTV IAFSFA 217  
 AmelOr46 TIEIY----SLLCPA---YK--LPVQ TNPT-HDI I LGTQ--LLSAFITSSS AAGAFSFA 217  
 AmelOr49 TVNIY----NLPCPA---YN--MPVD TNPT-HDI I LGTQ--LLSAFICSSS TAGAFSFA 217  
 AmelOr50 TVELY----NLPCPA---YK--IPFD TDPT I HDIMLGTQ--FLSAFVSSSASAFSFLA 218  
 AmelOr26 SYSMY----RLPCPF---YTNL LDVRFSPM-NEIVFALQ--LLSGFISTSVTVGACGLA 223  
 AmelOr53 NYTIR----PLPYIG---YDPFFDTQSSPT-YE I VYCIH--CFTAMIMYSISTVAYS LT 224  
 AmelOr54 NYTIR----PLPYIG---YDPFFDTQSSPT-YE I VYCIH--CFTAMIMYSISTVAYS LA 222  
 AmelOr52 NNTFK----PLTYLG---YDPFFDTQSSPI-YE I VFCMH--CFAAMIMYSVTTVAYS LA 221  
 AmelOr51 NFTIR----PLTYPG---YEAF LNIQKSPT-YE I IYCMH--CIYVIVVGNITMAAYS LT 221  
 AmelOr55 NQTNK----VLIFPA---YS--NSIQKSPI-YE I TYGIQ--CICGYVLD SVTSGACGLA 219  
 AmelOr57 NQTIK----MLIYPA---YGG-YNIQKSPT-YE I IYGVQ--CICEYVFD T IASGACGLA 220

AmelOr56 NQTIR----VLIYPT----YG--YNIQKSPI-YEIIYGVQ--FMCYVVDTTITSGACGLA 219  
AmelOr58 NRTIK----LLIYPT----YSRLYDVQKSPV-YELVYILQ--CICGYMFDVAITVVGACGLA 221  
AmelOr59 NRTIK----PVIYPT----YNGLFNVQKSPI-YEFVYILH--CMCGYVMHVSVTAGACGLT 222  
AmelOr60 NHTIK----PVIYPT----YSLGFNVQKSPI-YELIYVLH--CTCGYVMYSITAGACGLA 222  
AmelOr61 NRTIK----PVVYPT----YNGLFVDVQKSPI-YELVYLLH--SICGYIMYSVTAGSCGLT 222  
AmelOr63 EESAM----KYPVPF----ENTLILINMPENMYFLIFIVE--YLMMLLTSTGNLGSDSL 213  
AmelOr64 EESAI----KYPMPS----ENTLTLINMPEKMYFVIFIVE--YLMMLLTSTGNLGSDSL 209  
AmelOr66 VESAM----KYPIPS----KNILAIINMPENMYFVVFIE--YIMMLLTSTGNLGSDSL 209  
AmelOr65 EENAI----KYPIPS----KNALEIINMPDNLYFVVFIVE--YMMLLFTSIGNLGSDSVF 209  
AmelOr67 EKSII----KYPIPS----KNALAIINMPENLSFMVFIVE--YMMLLFTSTGNLGSDSL 209  
AmelOr114 -----LLFR----AYFPYDTTSPN-YELTILGQ--FVAALYAATSITAVDTFV 182  
AmelOr115 GG-----LLHP----ATFPYETSKSPN-YEITWLGQ--LMGTVLTAICYSCFDTF 201  
AmelOr118 -----QKFLVR----MEFFFIATISPR-YEIIILITQ--FIFESFIVYGAATSIALI 188  
AmelOr164 -----QKKFLK----MEFPFEATVSPL-YEIIITIQ--LVMQFMFATMAGFMFTII 197  
AmelOr163 TNNELILNKKLLK----MKLPFDFTIFPL-YEFVIVAQ--FVFECFVALTAGMLMAFS 202  
AmelOr165 SI-----SRELLFK----MDLPFETNESPN-YEFVVTSSQ--LLIHVSAAFVGTFSALL 195  
AmelOr166 TS-----SRELLLK----MNLFFDTNKSPI-YEFVVIQ--YFYQVSAAFVGFVFAAF 195  
AmelOr167 NL-----SPELLIK----MDLPFTYDESPI-YEYVFIQ--FIQLFFIASSIYALDALI 201  
DmelOr35a IFPPD-----SDPLYIFVPLLLTN--VWVGIVIDTMMFGETNLL 207  
DmelOr74a VYPPD-----NTQLHFFIPLLVLN--FWVGFIIITSMFLGELNVM 208  
AgamOr3 VE-----HVLHLEELYFLNIRTSMAHYTFYVAIMWPTIYTLGFTGGTKLLTI 228  
AgamOr5 VE-----HVLHLEELYWFHTRVSLVDYSIFTAIMLPTIFMLAYFGGLKLLTI 209  
AgamOr13 VH-----YTLQMEENFYGLQTRTTTSHYLIFGMFMTPTIYLCAFTGTVKILSI 209  
AgamOr15 MH-----YTLQMEENFYGLQTRTSATHYLIFGIVMPTAYLCAFTGTVKLLTI 209  
AgamOr17 MH-----FALQIEENFYGLQTRTTTSHYLLFGMIMPTVYLCAFTGTVKTVTI 209  
AgamOr16 PE-----FTLHMEESFYRLNVREKLDHYLIFGAIMVPSFLCALVGTAKLVSI 207  
AgamOr55 AQ-----YVLHMEEDFYGLQIRSSLRSLMFAIPMVPTSIVCAYVGC AKIMIV 209  
AgamOr18 FA-----FTLYLEQGFYWLDNRTSLLGYCVCTVFMPLMYLCAYTATVKVVAV 214  
AgamOr14 IRIWEISQVAPHRQFSLHMEQDFYGLQHRNTNILHYTLYIAVIVPMMFVTACTVHMKVLT 227  
AgamOr51 VRTWDIS----HRQFSLHMEQSFYGLQHRNTNILHYTLYIAVIVPMMFVTACTVHMKVLT 218  
AgamOr12 IQY-----YPNLEESFYWLDNRTSVRGYAVLSVVAFITFIFAVYSQTTKLLTI 218  
AgamOr19 IQY-----YPNLEESFYWLDNRTSVRGYAVLSVVAFITFIFAVYSQTTKLLTI 218  
AgamOr20 IQY-----YPNLEESFYWLDNRSSVYGYATFSIVALLVFTVASYNNAKLLTI 218  
AgamOr21 IRF-----YPNLEESFYGLDNRTSVYGYAAFSIVALLVFAFASYNNAKLLTI 215  
AgamOr50 IQY-----YPNLEESFYWLDNRSSVSGYAAFAVALIVFAFASYNHVTKLLTI 217  
AgamOr29 FII-----SSEMKCV--LYYLNIRFNLLHFSFYTIVICLLTITSAGSLCKIDMD 209  
AgamOr53 -----LYDLDIRYNPLHYSIYAGLIFVLSAISLSLCTKDVID 199  
AgamOr30 YVM-----PTEMKSVTFYFLDIRFNLLHYSLYFGAVSGLSVIGSLALCTKDVID 210  
AgamOr46 LVM-----ENR-----FYVLDSHYNLGHC FVHQALMFFALYILLVMFTAKAGTL 206  
AgamOr47 LIM-----ENR-----LYLIDSHYNLGHC FVHQALMFFALYILLVMFTAKAGTL 206  
AgamOr48 FML-----PLMQD---LYGLDVHNNIVHYTISWVAITPFCVFCALILWFKGALF 215  
AgamOr49 FLL-----PVESR---FFFLDIRHSIVHYTVFSLACPAFLFTAYLTVVKGLVF 223  
AgamOr61 IA-----VQILYGLLSNVWGLIYVLSFAIFYIIMNTLHLEMSILLDGI 223  
AgamOr62 PS-----VQIAYGMVTACWGI IYVLSFIVFYTLTGTFRLEMLTARSF 228  
AgamOr63 WP-----VQIVYGVLTMGFGGMYCMGFMMCYLLLSIFKLEVDILIRSL 225  
AgamOr60 FL-----IQLLYGWATCLWGS LYVLIFAFIYVLLNVFRGEMSLLVESF 221  
AgamOr75 SER-----APVLERVADLCYSLVGYVWGWHGATQLTIIVLLRYAITEFRVFLHSL 230  
AgamOr76 SER-----APVLERVADLCYSLVGYVWGWHGATQLTIIVLLRYAITEFRVFLHSL 230  
AgamOr78 SER-----APVLERVANLCYSLVGYVWGWHGATQLTIIVLLRYAITEFRVFLHSL 230  
AgamOr77 FD-----ASHWPLVAKVAFRLYAY--LAYAQLMLTFFGSYIITSSYL 208  
AgamOr79 FD-----ASHWPLVAKVAFRLYAY--LAYAQLMLTFFGSYIITSSYL 206  
AmelOr99 QQLLR-----VNYIVFDIDDYFFVYVQLAWGSIIVVLTIIAADWYF 214  
AmelOr101 QQLLR-----VNYIIFDIDDYFFYIYLQLAWGSIIVVLTIIAADWYF 214  
AmelOr102 QQLLK-----VNYLVFNDDDYFFVYVQLAWGSIIVVVTSAVAVDSL 214  
AmelOr103 QQLLK-----VNYLFFNDDNYFFVYVQLAWGSIIMVVVTIVAVDSL 214  
AmelOr104 QQLFR-----VNYLIFNHNDYFFYIYLQLAWGSIIVVMIIVTVDSL 214  
AmelOr98 QQLLR-----VNYMVFNADDYFFVYVQLAWGAIIVMIVITVDSL 213  
AmelOr100 QQLYR-----VNYFIFNHEDYFFVYVQLVWSSFVCVIVIIIFDWLY 140  
AmelOr97 FQIFK-----MKYFVNE--DEYFYPIYFHSVWSSFVIMITVITDLSY 166  
AmelOr105 QNIFN-----VNYIILDNYEYFYIVMHLSCSAVIVIIISVDSL 214  
AmelOr109 EFIYP-----TYFVDEQK--YYYPILTHMIAVILVLSVYLACDTNL 201  
AmelOr110 EFIYP-----TYFVDEQK--YYYPILMHMIAAILVLSIYACDTNL 201  
AmelOr111 ELIYP-----SYFVDEEK--YYYPILMHMIAVALILTSVYVACDTYL 201  
AmelOr108 EFIYP-----TYFFIDEK--YYYPILTYMATVILIVSSVYLACDTNL 201  
AmelOr107 ELVYP-----SYFVDEQK--YYYLITGHMLAVCLGHVYVYIACDINL 201  
AmelOr112 VFLYP-----AYFWLDEK--YVLLLLGHMIIITLLMICFICACDTNY 201  
AmelOr113 LYVIP-----GYFVDDDRDYFFYIQLHMSLSIIMVANVYVAYDTCY 202  
AmelOr106 VQMPY-----AYYYIENEADYYPILIFSIIVSLLTAMCVYIATDTTL 199  
AmelOr122 YFDLL-----FLLDDQSAYIKIFLILNFMNLNIFGLLSITSTESFTN 202  
AmelOr125 YFDLL-----FFFDDQSAYIKIFLILNFMNLNIFGLLSITSTESLTN 201

AmelOr123 HYSVI-----FLSNDRRKIDIFLVLNSIIIFTFGLLSLICSELFTN 199  
 AmelOr126 HYSLI-----FLSNDRRKCIDIFLVLNSIIIFTFGLLSLICSELLTN 199  
 AmelOr127 HYSVI-----FLSNDRRKCIDIFLVLNSIIIFIFGLLSLICSELFTN 199  
 AmelOr128 HFSLI-----FLSNDRRTYIDIFMVLNLIILIFGLLSIVCSESLTN 199  
 AmelOr129 HFSLI-----FLSNDRRTYIDIFMVLNLIILIFGLLSLICSESLTN 199  
 AmelOr133 MLHYV-----TLLSVNGTIYFYILCLDFLFIIFGLLSMICTETIVG 102  
 AmelOr134 MLHYV-----TLFSVNGTIYFYILCLDFLVIIFGFLSIICTETIIG 198  
 AmelOr131 ILLYV-----TLFSVNRITYFYIILYNFLFVITFGLLSLICTESIVG 200  
 AmelOr132 IAHYI-----TIFSDKRIYVDILCLNYMFLMIFVVL SIMSTESILG 200  
 AmelOr135 I IHYI-----TLFSVNRITMYFNILCLDFIFVVFIFALLSVICTESIIG 198  
 AmelOr136 IVHYV-----TIFSDKSIYMDILCLNYMLLAILVILSATCSILG 200  
 AmelOr138 I IHYI-----TIFPNRITYLDILSLNFMFVGFIFGSLSLACTESIFG 106  
 AmelOr130 FIYYI-----TTFSHNQSIYLDILDFNFMFTGIFGLLSVACSESITG 200  
 AmelOr137 I IHYI-----TIFPNRITMYLDILSLNFMFVGFIFGSLSLACTESIFG 199  
 AmelOr139 I IHYF-----TIFFHSRIYIDILCLNYIFLAIISLLSIIICIESMIG 121  
 BmorOr20 NITYDLS-----IYYET-FDILNTPNGYIFICVFNWFASYICCSFFCSFDLIL 226  
 BmorOr3 NITYDLS-----IYYET-FDILNTPNGYIFICVFNWFASYICCSFFCSFDLIL 226  
 BmorOr18 NITYDLS-----IYYET-FDILNTPNGYIFICVFNWFASYICCSFFCSFDLIL 226  
 HvirOr6 NSTFEHS-----LYLYPFNTSTDITGYIIACILHWIISYLCSCWFCIINLFL 232  
 BmorOr23 NVTLQQC-----VYYALPFDYTGNFKWWYLLVAIFNVQKTFCTSLFILFELSL 227  
 BmorOr16 NVTLQQC-----VYYALPFDYTGNFKWWYLLVAIFNVQKTFCTSLFILFELSL 227  
 BmorOr4 NVTLQQC-----VYYALPFDYTGNFKWWYLLVAIFNVQKTFCTSLFILFELSL 226  
 BmorOr5 NVTLQQC-----VYYALPFDYTGDFKWWYMLVAIFNVQKTFCTSLFILFDLLL 227  
 BmorOr22 NMTFQHA-----VYLGPFDYTTDIKGYFVVFILNWHLSHIAASYFCTFDLFL 233  
 BmorOr17 NMTFQHA-----VYLGPFDYTTDIKGYFVVFILNWHLSHIAASYFCTFDLFL 233  
 BmorOr1 NVTFFHS-----VYFAPFDYSHNFRGYIIMALFNSYVSVTCSIGLVMFDLLM 229  
 BmorOr1a NVTFFHS-----VYFAPFDYSHNFRGYIIMALFNSYVSVTCSIGLVMFDLLM 229  
 BmorOr1b NVTFFHS-----VYFAPFDYSHNFRGYIIMALFNSYVSVTCSIGLVMFDLLM 229  
 BmorOr19 SMEFQYY-----IYFWTPLDYKYNLRDYIIHTLCIYLGATAVTVIIVTFDIFN 226  
 BmorOr15 SMEFQYY-----IYFWTPLDYKYNLRDYIIHTLCIYLGATAVTVIIVTFDIFN 226  
 TcasOr5 -----ISTSEHSTVKLGWYCNFITEMFLFYFLIVLRSLY 188  
 TcasOr7 -----HFLNLENHNLEESVRVFFMLQDLAQSTFNIIEEFML 195  
 HvirOr4 ALA-----LTARQVSIPEKPKTSSPLNIYAIRVAPVDSQRSANV 205  
 BmorOr13 GLR-----TLLHQSGIESLTEIPNSNEQHTANAILPQPPKSVNN 254  
 DmelOr10a VWFTP-----FNMTMPKVLNYPFFPLTYIFIAITGYVTIFMFGGCDGFY 216  
 DmelOr33c ELLYP-----AYFPFDLESNRFLGAVALGYQVFSMLVEGFQGLGNDTYT 197  
 DmelOr7a LYLPG-----LDWQRSQMQFCIQAWIEFLIMNWTCLHQASDDVYA 212  
 DmelOr22c ELPFN-----IILPSFAVQPGVFPPLTYVLLTASGACTVFAFSFVDGFF 211  
 AgamOr1 PVP-----AWFPVDYHHSIDIVYGVFLYQTIIGIVMSATYNFSTDTMF 206  
 AgamOr4 LEVK-----FYWLENRTSVEDYITFVLIMLPVVVMCGYVGNLKVMTI 210  
 DmelOr47b SVYP-----FQWHRDLHPYTFWFLYIWQSLTSQHNLMSILMVDVMVG 227  
 AmelOr73 TLPVS-----DWIPYDLSSTELYIISLLYQTVGLLICANASVGNETLI 193  
 AgamOr68 FCEIP-----YVDWTVMKGYWTTVILQLFFYITGTCLGILVDYLCAYFTING 207  
 DmelOr59a MYP-----AWFPFDWLSHSTRNYIANAYQIVGISFQLLQVSDCFP 197  
 DmelOr23a -----MWFPPFDWKNMVAIYIGALVFQEIYGVFQIMQCF AADSFP 192  
 AgamOr31 KLP-----LLMDFPFVVKHPVTFTIFFVWCSVAIFWVVLDCVACDSTF 195  
 DmelOr2a LYP-----AWFGVDWMHSTRNYVLINIYQLFGLIVQAIQNCASDSYP 202  
 AmelOr62 DIPLKLN-----YFLASYCVFGLSPLLLHHVCVLLLQGFIFVNAVHACGNDGLF 218  
 AmelOr121 KKLFP-----LPSYIFDVSETPYFEIMYALQSI SLLIAAFCYAGVDNFF 214  
 AmelOr140 -----TMYMLYAQHAYALFAIVSYELKTIHLLNNTNLI 183  
 TcasOr12 PLSG-----WYFPSTEKSPAFAFYTYQIFTTWVGGLGDISMDFM 205  
 AgamOr8 HKQLP-----YFMWYWDWHRPGYFAVTFHLQNWGGFVSAVYFVYLDLDMF 215  
 BmorOr9 QFVLP-----YAVLLPFKTD SWIPWLIVYVYSIFCGFTCVLYYATVDVLY 202  
 AgamOr40 TLPFP-----CWYPVDVHESPMYELAYIFQVLGQLQVSLVFLGASALF 213  
 TcasOr63 PLPG-----WFPYDNTNYSTFFVQS---LSLFI SAYCNTAIDILT 198  
 TcasOr4 PLPG-----WFPFDVKTHQIELVIAQT---CGIAIGAFLNSTLDILP 191  
 TcasOr13 ILSLP-----YVVCYCFMIEIMFWQFVNSIKIRLILLNERLEQIG 215  
 AgamOr24 ILPPG-----FVMPFIDANTLAGYYANYGIQLIMAIYYWIIITVGS DITT 193  
 AgamOr54 -----SLLWSIAVEYVLPFGFFIPTVGM DTLQ 190  
 AgamOr23 SLAFG-----FYLFPVDYRTPVGFAINWVYQFVQVLEGCIGLMACDSCL 197  
 AgamOr64 VVG-----PLYFQIIVEIFTGYLSLGYFVPSICITLMTLQLFRTEMHIL 225  
 DmelOr82a ELPMP-----MKFPFNDES PGEVCFLYTVLVTVVVVAYASAVDGLF 203  
 AmelOr116 PIAG-----WYPYNVTSTPIFEIACLHQVLVILINCINNIAIDTLI 208  
 AmelOr160 PFELP-----MKVNNVYEITKLQTYALFCVYLIPSTLLTIGATGADSL 208  
 TcasOr10 -----RQFLKAVKHHEFLQYVEQLGDIYSMWFLQYFSSLF 175  
 TcasOr26 TEVCG-----VVSPVWLPFRFDYKPMKQFVYFWQSFCLYSNGGAGTISFAM 191  
 AmelOr117 NRHLP-----FIVWYGTDISASPSFEIVFFYQIISSICASVISGLDTS 211  
 AmelOr120 NFTIKN-----FPFAASYPIITFYKPFYEIAYISQILATSICCLMLLAIDSLI 201  
 BmorOr7 EFP-----FWIQIDYTKSSMFVVVLLYSYVVTTLVGIANTTMDAFM 197  
 AgamOr6 QLAFN-----IWWPFDVLGGVKYWFVYPLYVYVIGFTGIIHMAFDCLF 214

|           |                                                               |     |
|-----------|---------------------------------------------------------------|-----|
| DmelOr45a | TPPTP-----MEFNFWLDERKPHFYWPIYVWVGLVAAAAWLAIATDTLF             | 200 |
| DmelOr67d | QFLIP-----FLDHTTDGGHLLILTAHVILITFGGFGNYGGDMYL                 | 208 |
| DmelOr83c | QYLIPG-----LPLENNYCYVVTYMIQVTMTLVQGVGFYSGLFV                  | 203 |
| AmelOr162 | G-----CNGYRITPPQZKGZMVSCKQGLCTLAQTHNRVSIKLT                   | 207 |
| HvirOr3   | -----MESLMNQILALEVLAFCVFPGLCRAFAMQGLV                         | 84  |
| TcasOr20  | RYGIPCG-----LVVRFLLPFKFDYSPLAELVALYEILVCILGTSVVIIVVTTLI       | 204 |
| AgamOr11  | TGTSAAANITRKGQPIPTPILRSWYPTADGKDKHFLEIYLIQLYIMYVQGLIVPSWHMFM  | 231 |
| DmelOr56a | AVRRGEE-----HPILLFQLFPFGELCDNFVVGYPWYALGLGITAIPLWHTFI         | 222 |
| AgamOr28  | TIALP-----YLSRFAYSTESTTSFAWYFFLIGVYLLALTLGSGFDSL              | 232 |
| AgamOr58  | ELS-----LLDSVNVLLYPLAMTMSLMFIHTIMIVSTLLSAL                    | 201 |
| AgamOr59  | GEPVG-----TEFDHFLYMSCLYFPTVGFVFMGCSIVNAMLVGFLGEM              | 217 |
| DmelOr1a  | FAPVS-----SFRVLLPYDVTQPHVYAMDCCLMVVLSFFCCSTTGVDTL             | 205 |
| DmelOr13a | NKPPF-----YKMIFPYDAQSSWIRYVMTYIFTSYAGICVVTTLFAEDTIL           | 212 |
| AmelOr161 | VLPFRG-----YFFINQTVSPIFEFLYLFNVITAGGFGGSMIAGATSN              | 205 |
| AmelOr141 | DSSLVPSEAGNILESMSKRHLPYAFFLDVQKTPWYEIVYAVQLIGMNFVGFCTCVGVDTVG | 222 |
| AgamOr52  | LLATN-----RPLTWTLHLIMRPMTFNGLGAFIATFVSIHTMLTVLHAE             | 189 |
| AgamOr36  | EV PAN-----LAELQWPMVAVHVLSDFDFASRWGAAYNVSLTGMNSIM             | 211 |
| AgamOr25  | PLP-----MYLPYMPHDVTPYWHLNFTFTVMNLMCILFLVIGIDGLL               | 184 |
| AgamOr45  | ALQLP-----FLPPDRNMVYVCINIAHLLLNITIGVFIILLPMDGVL               | 204 |
| TcasOr3   | VYHQEQP-----VNTVSPFGSGTKLRFFVTFIYTMIALTFYAWTIVALDSL           | 222 |
| DmelOr88a | QLLGG-----WLP CGVRKDPNFYLLVWSFDLMCTTCGVSFVTFDNLF              | 218 |
| AgamOr22  | TLPLG-----YSIPFADYRTHPWYLYNYLLQIVQVQWVALVFGLDGPF              | 208 |
| DmelOr49a | DFTYKR-----IFPRLTFDSEKPLGYVLAYVIDFTYSQFIVNVSLGTDLWM           | 212 |
| DmelOr85f | MHCYP-----YFLYDPEKDPVWIYISIYALEWLHSTQMVISNIGADIWL             | 209 |
| AmelOr119 | KYPLN-----TTVSPWHEISFFVETCAVSGLLGIIVMDSMTTFKCSLI              | 222 |
| DmelOr63a | MLPLP-----SLYP AWEHKGLEFPYYHIQMYLETCSLYICGMAVDFDGVF           | 233 |
| DmelOr67b | TLTYP-----AIVPYLQLGNYEFPSYVIRFLLQSGPLWCFFAVFGFNSLF            | 234 |
| BmorOr21  | KHMIHDIN-----NPF TDDPEDRFESPFIEIMFVYTFSSFIYIINYVGYDGGF        | 215 |
| BmorOr11  | EFRLEP-----MFDMTYPEPIESYKTSFPVYFILFVFFLFGCYASSLFAVDPLV        | 213 |
| BmorOr12  | ITAWP-----DKTDTSKTASYARIGFYLFWCIHFRISTVFAVICILISI             | 216 |
| AgamOr33  | -----LYRRASAQPDGATVLHAAQTVRADRGRSSAAPRGPPR                    | 191 |
| HvirOr1   | MDTYQG-----FVTHFYWPWFNYLPYSIVLGVITQFLHFQSTFIWNFSDLFV          | 231 |
| HvirOr5   | -----TIATLLWNFQDQVIVLISMGLTSRYRRLNEC                          | 156 |
| TcasOr1   | -----LI IHVST SAYVATVWINSVINRWKFI EFRKRVLEFD                  | 167 |
| TcasOr2   | -----VIGQFLGYFIGLITFVMSQHCVELVSMIKARF                         | 193 |
|           |                                                               |     |
| TcasOr16  | MELSATLDTYVPKSADLFRAPSATSQDQ-----LIENDYNEKNEDLKGVYSTRQELGG    | 295 |
| AmelOr2   | MEFSATLDTYVPNSGELFKAGSAEQPKEQEPVPTPPQGENMLDMDLRGIYSNRDFTT     | 299 |
| AgamOr7   | MELSASLDTYRPNSSQLFRAISAGSKSE----LIINEEKDPDKDFDLGSIYSSKADWGA   | 295 |
| AaegOr7   | MELSATLDTYRPN SAALFRVASAGSKSE----LILNEEKDPDKDFDLNGIYNSKADWGA  | 279 |
| DmelOr83b | MELSASLDTYRPN SAALFRSLSANSKSE----LIHNEEKDPGT-DMDMSGIYSSKADWGA | 296 |
| BmorOr2   | MELSAALD TYRPN TAELFRVSTDKT-----EKVPDAVDMDIRGIYSTQQDFGM       | 291 |
| BmorOr2a  | MELSAALD TYRPN TAELFRVSTDKT-----EKVPDAVDMDIRGIYSTQQDFGM       | 291 |
| HvirOr2   | MELSASLD TYRPN TAELFRASSTEK-----EKIPD TVDMDIRGIYSTQQDFGM      | 290 |
| AgamOr56  | VFVETFTWNLVYATSCMFRILQIQVN-----ELSHQSRNEKEWNG                 | 245 |
| AgamOr57  | FFVETFTWNLVYATSCFLRILQIQAN-----ELSHQCRNEKEWNG                 | 245 |
| AgamOr26  | ITIECFTWNLVYATSCMFRILQIQAT-----ELLSRDRKKEWNI                  | 245 |
| AgamOr27  | VFVETFIWNLVYATSCMFRILQILAN-----ELSDRKRNEGIWTV                 | 245 |
| HvirOr9   | FTCCTFIHIQFSLLNNDMERLVNEDTPR-----YD-----KT                    | 249 |
| HvirOr7   | FTCCTYIRVQFKLLQYDFERMIPDRGIS-----KGK FYEENELRN                | 233 |
| DmelOr85b | CAVATQLVMHFDFLSNSMERHELSG-----DWKKDSR                         | 239 |
| DmelOr85c | CAVATQVVMHFDYLARVVEKQVLDLDR-----DWSNSR                        | 238 |
| DmelOr85d | CALVTLVVMHFIRLSAHIESHVAGIG-----SFQHDLE                        | 261 |
| DmelOr67a | FAVVLQVIMHYERLAKVLREFKIQA HNA-----PN---GAKEDIR                | 257 |
| DmelOr67c | VVVITQICMHFNYSMRLEDHPCNSH-----EDKENIE                         | 253 |
| DmelOr92a | IATITQLTMHFNFIANDLEAYEGGDH-----TDEENIK                        | 258 |
| DmelOr69a | CLLT FQLKLHYDGISSQLVSLDCRRP-----GAHK                          | 245 |
| DmelOr69b | NFFGIQLEIHF DGLARQLETIDARNP-----HAKD                          | 245 |
| TcasOr6   | KEIGRNWGYEERFKCSVKHHIHVLELLDKI-----                           | 219 |
| TcasOr11  | TQNR-----EKFLETVQHHAFALEIPDDL-----                            | 231 |
| AgamOr41  | CIQYDILAVKLQDLDELIRSPHPRDAM-----                              | 235 |
| AgamOr42  | CLQYELLIERLQQLDERIRSSN-NLKL T-----                            | 240 |
| AgamOr43  | AGYADV LKNKINEMNTLLLD AQNSRDR-----                            | 235 |
| AgamOr44  | AGYADV LKNKIDEMNIILLDAQNSRDR-----                             | 235 |
| AgamOr66  | VTYGGFLFKIECEQFDQDLSGVFQHC EWRTA-----                         | 236 |
| AgamOr67  | VTYGGFLFKIECEQFDQDLSGVLQHC EWRTV-----                         | 236 |
| AgamOr72  | MARADISIVHLRELENILNNSPKNE-----                                | 232 |
| AgamOr73  | MARADISIVHLSELENILNDSTKNE-----                                | 232 |
| AgamOr71  | MARTEISILHLGELENMLIDPNKNE-----                                | 232 |

|           |                                                  |     |
|-----------|--------------------------------------------------|-----|
| AgamOr74  | MARADISIVHLGELKNMLNDPTKNE-----                   | 232 |
| AgamOr70  | MVKADIFIIHLGELEKMLNDPLTMK-----                   | 232 |
| AgamOr69  | MTCIDIFIVHLCELETLLKEIHIHEKE-CA-----              | 236 |
| TcasOr9   | SNFKNNVYRALVDSEVSEKIVQTFSKNLHN-----              | 124 |
| TcasOr18  | SNFKNNFYTSLIKLGAEEESIVQNFSDIKT-----              | 229 |
| DmelOr83a | CSLKNVLASSYVLMGANMTELNQLQAEQSAA-----             | 263 |
| DmelOr85e | CSLKNLDAHTKLLGGESVNGLSSLQEELLG-----              | 272 |
| TcasOr24  | LEIACNIKLRDLQNCMLVSCFDG-DVEAS-----               | 234 |
| TcasOr25  | LEISSHINLRIEQLKIFIAGCFDR-DFKAS-----              | 234 |
| TcasOr19  | LEISCHIRLRIEQLNAMILNCFNG-DLQSS-----              | 199 |
| TcasOr22  | FEVAQYICLKIKHLNSLLRQAFDDPHEEVI-----              | 232 |
| TcasOr23  | FEVAQYICLKIKHLNRLLEAFDDPCDVVV-----               | 232 |
| AmelOr168 | TSQYKYLRIKFATILKENGESAKDNDK-----                 | 233 |
| AmelOr170 | TAQYKYLRIKFAIILKEEREITKDHYKNI IW-----            | 238 |
| AmelOr169 | TAQYKYLRIKFAAILEQ--ETPKDFFYGGII-----             | 237 |
| DmelOr65b | ICIYAEITFGIEVLCLELRQIHRHNYG-----                 | 227 |
| DmelOr65c | VSIYVEITFAIEVLCLELRHLHQRCG-----                  | 227 |
| DmelOr65a | VSLFFELTSALRVLCIELRNQLQELCLGD-----               | 259 |
| TcasOr17  | AALNMFVGAQCDDLCDNLRNIGQ-----                     | 222 |
| TcasOr21  | AALNVYIGNQIDILCNNLRNLKA-----                     | 220 |
| TcasOr56  | CGFMMLIKAQFLIVKRELETLIERAQKAAIAENPDNEDNFGRE----- | 265 |
| TcasOr15  | CGFLMLIKAQFLIVKRELETLVERAQRAG--NPDRGD-FGGG-----  | 259 |
| AgamOr9   | AALLALTNAHLHRLQIQLLKVDANKRMITVSPIDDDAR-----      | 252 |
| AgamOr65  | AALFALTNNAHLHRLQIQLMK-DAKRRMIAVSSFDDNAR-----     | 255 |
| BmorOr6   | VATMMFSCAQLDIIMKKTQQ-----IQEIPLSPELS-----        | 225 |
| BmorOr10  | LSMIMFGCAQLEIIMDKIGK-----VKSWSLDQQPM-----        | 224 |
| AgamOr34  | CYMMHMIGIQLELLGKRFRDLN-----NCE-----              | 222 |
| AgamOr37  | SYLLGMISIQLDLIGKRFRSLH-----TSE-----              | 234 |
| DmelOr94a | CYFLFHISLLYRLLGLRRLRETKNMK---NDT-----            | 230 |
| DmelOr94b | CYFMFHIASLFRLLGMRLEALKNAA---EEL-----             | 227 |
| DmelOr71a | WYLMHLHSLCLRMLGQRSLKQ--H---DDK-----              | 221 |
| DmelOr46a | SSLFIFLKCQLDILAVRLDKIGRLITTSGG-----              | 225 |
| DmelOr46b | YSLLCFLKVQLQMLVLRLEKLGVPVIEPDNE-----             | 225 |
| HvirOr8   | AGLMVLAIQALDILGIKLRRTDKEVLEETDSE---T-----        | 232 |
| BmorOr8   | SGLLMAVQTQKIIQTLLSLK---LNPREK---M-----           | 230 |
| AmelOr68  | CGLFVHMYSQEIILKHLKESV-----                       | 217 |
| AmelOr69  | WALLMHICSQIEIFNCRLRKIK-----                      | 213 |
| AmelOr70  | AGFLVQIYCQFEILEERLKNVQ-----                      | 215 |
| AmelOr71  | SGLLIHISCQFEILEHRLKNIG-----                      | 215 |
| AmelOr72  | AGLLLQVCCQLDTLVYRLQNIK-----                      | 216 |
| DmelOr19a | GTYLILVSVHTKALALRVSKLGYGAPLPAVR-----             | 229 |
| DmelOr19b | GTYLILVSVHTKALALRVSKLGYGAPLPAVR-----             | 229 |
| DmelOr33a | PITFCVVGHVRLIMRLSRIGHDVKLSSE-----                | 224 |
| DmelOr33b | PMTFCVVGHVRLIMRLSRIGHDVKLSSE-----                | 226 |
| DmelOr22a | LISMLMARCHISLLKQRLRNLRSKPGRTEDE-----             | 239 |
| DmelOr22b | LISMVIARCHITLLKQRLRNLRSEPGRTEDE-----             | 239 |
| DmelOr42b | LIYTLILRAHLDMLRERIRRLRSDENLSEAE-----             | 239 |
| DmelOr59b | LMFTIMFRAHMEVLKDHVRSRLMDPERSEAD-----             | 240 |
| DmelOr59c | IVFISLFRCHLAILRDRIANLRQDPKLSME-----              | 242 |
| DmelOr98a | LLYGLILRVHLKLLRRLRVESLCTDSGKSDAE-----            | 237 |
| DmelOr42a | VNFVVLVRAHMSIFAERLRLRGTYPYESQEQ-----             | 242 |
| DmelOr85a | IIVVVVLR IHMELLSERIKTLRTDVEKGDDQ-----            | 237 |
| DmelOr43b | VIYVAALRTHILLKLDRIIYLGDPSPNEGSSDPSY-----         | 242 |
| AgamOr2   | ATCTLFALVQIAALKQRLGRLGRHSGMTAST-----             | 219 |
| AgamOr10  | ASSTLFGLVQIKTLQHQLKTFR--SSEMLN-----              | 217 |
| DmelOr30a | VTFTLFAILMCRVLQHKLRSLKLEK-----                   | 221 |
| DmelOr49b | VGLIMFGIVRCKALQHRLRQVALKHPYGDR-----              | 218 |
| DmelOr43a | AGLAIFGKAMLQILVHRLGQIGGEEQ-----                  | 218 |
| AgamOr32  | SEMASNLTIHFDIVRERFEKL-----                       | 217 |
| AgamOr35  | SELATSVTIHFQLIQRQFQAV-----                       | 229 |
| DmelOr47a | CSFTSNLCAFFKIAQYKVVR-----                        | 221 |
| DmelOr98b | CSLSHNLCALFQIARHKMMHF-----                       | 222 |
| DmelOr9a  | FFFTYNVCAIFKIAKHRMIHL-----                       | 233 |
| AgamOr38  | SGVCLYMDGQFQAIRLELEALAETVDKY-----TLK-----        | 249 |
| AgamOr39  | SGVCLYIYGQFQAIRLEVEALAETVDRN-----TLK-----        | 250 |
| DmelOr24a | LGFCLYFTVLLCLQDDVCDLLEVENI-----EKS-----          | 229 |
| DmelOr45b | FGFTLYMAFLLQALRYDIQDALKPI-----RD-----            | 238 |
| AmelOr74  | CILNLHALYQFRMMQQELSKIWSAIEQQ-----TT-----         | 232 |
| AmelOr86  | CVLNMHVVCQFRILQHRLTKLWSIIDER-----AD-----         | 232 |
| AmelOr75  | CIVNLHVAGQFRILQHRLKNLG-----NAIRDET-----          | 231 |

|           |                                             |     |
|-----------|---------------------------------------------|-----|
| AmelOr84  | CIVNLHVAGQFRILQHRLRNLN-----VAVTGDR-----     | 229 |
| AmelOr87  | CLMNLHAATQFRILQHRLSDLGSGWDTRRSFNKIDRET----- | 256 |
| AmelOr76  | CILNLHTASQFRILQHRFANTCNEKRG---K--RDED-----  | 234 |
| AmelOr85  | CIINLHIAGQFRILQHRFSNVNEMCE---KCCYQLSR-----  | 239 |
| AmelOr88  | FVINLYTAGQFRILRYRFENICGKNDD---KNYKYSK-----  | 238 |
| AmelOr91  | CIMNLHLAGQFKVLQYRISTIADRVIK---EKKKELI---    | 238 |
| AmelOr92  | CIMNFHVAGQFKVLQHRISTIADLTIKT---EKKKELI---   | 235 |
| AmelOr95  | CIMNLHVAGQFQVLQYRISNIIDSIDK---EKKEKLIM----- | 234 |
| AmelOr93  | CIMNLHVAGQFQVLQYRISNIYXRFN---EKKEKLIV-----  | 224 |
| AmelOr77  | CVLLNLQLAGQFQILQYKMANIVDLLKE---KNEKRII----- | 237 |
| AmelOr94  | CIMCLHLASQFRILQYRLANVSNVEDE---EGVE-----     | 233 |
| AmelOr96  | CILCLNVACQFRILQYRIANVPILKMK-----GNPD-----   | 233 |
| AmelOr79  | CIMAVHLAGQFRILRYRLTKLC---EQEI---YEKDS-----  | 233 |
| AmelOr83  | CIMAVHLAGQFRILRYRLMTLCDTEPET---REKDSRS----- | 238 |
| AmelOr80  | CIMAVHLAGQFRILRYRFTKLCDEMEYGI---KENSQS----- | 236 |
| AmelOr81  | CIMAVHLAGQFRILRYRFTKLCDEVEY---ENSQS-----    | 233 |
| AmelOr82  | CIMAVHLAGQFRILQYRLTKLYDVEICIE---MHKKDS----- | 235 |
| AmelOr78  | CIMAVHLAGQFRILQYRFTKLCDTDNQI---CKKNL-----   | 235 |
| AmelOr89  | CIMTVHLAGQFQILRHRFDRLCNAEDRI---AEKG-----    | 235 |
| AmelOr90  | CIMAIHLTGQFRILGYRFAKLCNIEHEM---REKDTV-----  | 234 |
| AmelOr142 | ALLLRYATARFEILGIQFNNAKS-----                | 218 |
| AmelOr146 | ALLLFAAARFEILMNELRAVEN-----                 | 218 |
| AmelOr148 | ALLLWFAAARFECLVEELQKITN-----                | 215 |
| AmelOr158 | ALLLWFATARFECLIKELQKITS-----                | 216 |
| AmelOr147 | ALLLWFTSARFECLVKELQKITT-----                | 216 |
| AmelOr150 | ALLLWFTAARFECLIVELKKITN-----                | 218 |
| AmelOr151 | ALLLWFTAARFECLAVELQKITN-----                | 218 |
| AmelOr152 | ALLLWFVSARFECLAVELQKITD-----                | 218 |
| AmelOr154 | ALLLWFTVARFECLIEEFQKCSN-----                | 218 |
| AmelOr155 | ALLLWFTVARFECLIVEFQKCTD-----                | 218 |
| AmelOr157 | ALLLWFTTARFECLIGELRGVTS-----                | 215 |
| AmelOr156 | ALLLWFVVIKFECLIMKIQNISN-----                | 218 |
| AmelOr153 | --LLWFTAPRFECLCVELQNVTN-----                | 202 |
| AmelOr144 | VILFSFPAAKLDVLRSKLRHVNN-----                | 219 |
| AmelOr145 | VILFSFPAAKLDVLGSKLQNVNN-----                | 220 |
| AmelOr143 | VILFSFPAAKLDVLRSKLRHVNN-----                | 214 |
| AmelOr1   | ASITMHCCGLFEVTNRKIKTLCKWN-----              | 241 |
| AmelOr3   | ASITMHCCGLFEVTNRRIETILK-----                | 244 |
| AmelOr6   | LMLSLHMCSLLKILRRKMIDLADGSIT-----            | 235 |
| AmelOr7   | LMLSLHMCSLLKILRRKMIDLADGSIT-----            | 235 |
| AmelOr4   | LMLSLHMCSLLKILTRKMADLTDGSI---               | 237 |
| AmelOr5   | LMLSLHMCSLLKILTRKMANLTDRSIT-----            | 237 |
| AmelOr8   | LMVCMHMCGLLRILTNKLTDLTNDND-----             | 238 |
| AmelOr9   | LMLCMHMCGLLRILTNKVELTSDKD-----              | 238 |
| AmelOr11  | LMLCLHMCGLLKILTNKVMDLTNDSD-----             | 236 |
| AmelOr12  | LMLCLHMCGLLKILTNKVMELTNDKD-----             | 238 |
| AmelOr10  | LMLCMHMCGLLRILTNKVMELTNDND-----             | 237 |
| AmelOr14  | VMFCLHSSLLRILLNKIYQLTKQLDV-----             | 239 |
| AmelOr15  | AMLCLHATSLLRILVKKINELTKQPDI-----            | 240 |
| AmelOr13  | TMLCLHMCSSLEILINKMNDLTCQSD-----             | 231 |
| AmelOr16  | ALLVLHACSMRLILVNKIKKLVKSDM-----             | 242 |
| AmelOr17  | ALLVLHAWSMRLILVNKIKKLVKSDM-----             | 242 |
| AmelOr18  | ALLAIHACGQLQILMSWLEKLVDRK-----              | 250 |
| AmelOr19  | ALLAMHACGQLQILMSWLEKLVDRG-----              | 250 |
| AmelOr22  | AIFAVHACGQMQVLSNWLKHLINGRS-----             | 251 |
| AmelOr24  | AIFAVHACGQMQVLSNWLKHLINGRS-----             | 243 |
| AmelOr20  | ATFAVHACGQMQVLMNWLQHLIDGRL-----             | 247 |
| AmelOr25  | AVFAVHACGQMQVLMNWLQHLIDGRL-----             | 242 |
| AmelOr29  | AVFAIHACGQMQVLMNWLNLHLVEGRS-----            | 243 |
| AmelOr30  | AVFAVHACGQMQLMNWLECLVDGRS-----              | 243 |
| AmelOr21  | AIFTVHACGQIQVMMIWLHLEHLEGR-----             | 243 |
| AmelOr23  | AILTIVHACGQIQVMMVWLKHLIDGRL-----            | 243 |
| AmelOr35  | AVFVMHACGQFQILVTKLRLIDGLKED-----            | 250 |
| AmelOr27  | AVLAAHAYGQLSVVMVWITEFVNQSR-----             | 244 |
| AmelOr28  | AILGAHACGQLSVVMTWITEFVNKSK-----             | 245 |
| AmelOr33  | AVFAAHACGQINLLMAWIRQLVNHSN-----             | 246 |
| AmelOr34  | AVFTAACGQVSLLMWIRQFVDHSN-----               | 246 |
| AmelOr32  | AVFAAHACGQLSLLMVWIREFVDHNS-----             | 245 |
| AmelOr31  | AVFTAACGQLTIKRWIREYINRSK-----               | 245 |
| AmelOr36  | TVFACHASGQLTIMIWIIEEFINRS-----              | 242 |

|           |                                         |     |
|-----------|-----------------------------------------|-----|
| AmelOr37  | TVFACHASGQLTIMIIWIKEFINRP-----          | 243 |
| AmelOr38  | IVFACHASGQLTIMIIWIEEFINRP-----          | 243 |
| AmelOr39  | TVFACHTIGQLTIMVTWIEEFINRP-----          | 243 |
| AmelOr47  | TVFACHAIGQLTIMISWIQEFVNQP-----          | 242 |
| AmelOr48  | TVFAYHAIGQLTIMISWIQEFVNQP-----          | 242 |
| AmelOr40  | TVFACHAAGQLTIMVTWIKEFVNRP-----          | 242 |
| AmelOr43  | TVFACHAIGQLTIMITWIEEFVNRP-----          | 243 |
| AmelOr45  | TVFACHAVGQLTIMITWIEEFVNRP-----          | 242 |
| AmelOr41  | TVFACHAVGQLTIMVTWIEEFVNRP-----          | 242 |
| AmelOr42  | TVFACHAVGQLTIMVTWIEEFVNRP-----          | 242 |
| AmelOr44  | TVFAYHAVGQLTIMVTWIEEFVNRP-----          | 242 |
| AmelOr46  | AVFASHALGQLNIMVAWINEFVNRP-----          | 242 |
| AmelOr49  | AICASHALGQLNLMVIWINEYVNRP-----          | 242 |
| AmelOr50  | TIFTCHVLGQLNIMMIWINEFVDRLQ-----         | 244 |
| AmelOr26  | AVLAMHACGQFNVMIRSDKLVKDNNE-----         | 250 |
| AmelOr53  | TIFVTHICGQIQVQIARLQDLVESK-----          | 249 |
| AmelOr54  | AIFVTHICGQIQIQIARLQDLVECK-----          | 247 |
| AmelOr52  | AIFVTHICGQIQIQATRLQNLVENK-----          | 246 |
| AmelOr51  | TIFITHACGQIKIQMLRLENLKNK-----           | 246 |
| AmelOr55  | ALFVTHACGQIDVVISRLDDLAVAGQF-----        | 245 |
| AmelOr57  | ALFVTHACGQIDVIMSRLDDLAVAGQ-----         | 245 |
| AmelOr56  | ALFVTHACGQIDIITSRLDDLAVAGQF-----        | 245 |
| AmelOr58  | ALFATHICGQIDIVMAKLEDLVDGKF-----         | 247 |
| AmelOr59  | ALFATHACGQIDIVIARLNDLIHGKY-----         | 248 |
| AmelOr60  | ALFVTHACGQIDIVIARLNDLVHAKY-----         | 248 |
| AmelOr61  | ALFATHACGQIDIVIARLNDLIHGKY-----         | 248 |
| AmelOr63  | FSIVFHLCGQVEILRLEYNKLSNENE-----         | 239 |
| AmelOr64  | FGIAFHLCGQVEILRLEYNKLSNENE-----         | 235 |
| AmelOr66  | FGIAFHLCGQVEILRLKYNKLSNENE-----         | 235 |
| AmelOr65  | FGIVFHLCGQVEVLKREYSKLFNKNE-----         | 235 |
| AmelOr67  | FGIVFHLCGQVEILKLYNKLSNTNE-----          | 235 |
| AmelOr114 | AMLILHVCGQLSGIKNELSRLP-----             | 204 |
| AmelOr115 | AVLVLHLCGQLTVLGTALDELVNATR-----         | 227 |
| AmelOr118 | AALILYVGSQIDLFCQNLT--FHSYK-----         | 212 |
| AmelOr164 | ATFVLHIASQLDIICDRLSEILDEHK-----         | 223 |
| AmelOr163 | AALVLHIGSQIDITCQELI---EIPR-----         | 225 |
| AmelOr165 | LMMVLHIGCQIDILCQNLLDIPHIST-----         | 221 |
| AmelOr166 | LMIVLVHVCQIDIMCQTLMKTTHRDQ-----         | 221 |
| AmelOr167 | ITLIFHIGGQIEILHKTLLKNISINDE-----        | 227 |
| DmelOr35a | CELIVHLNGSYMLLKRDLQLAEKILVA-----R-----  | 236 |
| DmelOr74a | GELMMHLNARYIQLGQDLRRSAQMLLKK-----S----- | 237 |
| AgamOr3   | FSNVKYCSAMLKLVALRIHCLAR-----            | 251 |
| AgamOr5   | FSNVKYCSAMRLVAMRIQFMDR-----             | 232 |
| AgamOr13  | CNITMYCTLYFQLVQLKLRAT-----              | 231 |
| AgamOr15  | CNITTYCTLYFQLVQLKLRAT-----              | 231 |
| AgamOr17  | CDTTIHICILYFQLAQLKLRIVT-----            | 231 |
| AgamOr16  | LSLIKYCTIYFQLVKVLEEVEG-----             | 229 |
| AgamOr55  | FNFTSYCTVYFRLVALQLQYQT-----             | 231 |
| AgamOr18  | FNMIKYCQTVLRIVVLKLRLLKTL-----           | 238 |
| AgamOr14  | ASSVRYAEMLLHVMLKVDNLHRI-----            | 251 |
| AgamOr51  | ASSVRYAEMLLHIVMLKVD---SL-----           | 239 |
| AgamOr12  | LSTIKYCSTLLQLVNIAIEGLSS-----            | 241 |
| AgamOr19  | LSTIKYCSTLLQLVNIAIEGLSS-----            | 241 |
| AgamOr20  | LTTIKYCNLTLQLVIEVDNLNH-----             | 241 |
| AgamOr21  | LSTIKYCSTLLQLVGVEVDNLNH-----            | 238 |
| AgamOr50  | LSTIKYCSTLFLVLSIGIDELNL-----            | 240 |
| AgamOr29  | VAVIKTTCLLFQTTAMQIRELKDN-----           | 233 |
| AgamOr53  | IAAIKTVTLVFGIVTMQIRDLHEQ-----           | 223 |
| AgamOr30  | FSLIRTASMLFQATAQQIRNLPPG-----           | 234 |
| AgamOr46  | FGLIRFCSTVLGIIVLKIERLSQIGPV-----        | 233 |
| AgamOr47  | FGLIRFCSTVLGIIVLKIERLSQIGPV-----        | 233 |
| AgamOr48  | M-LIRYNTLLYQLVNRLQLQYDRESAG-----        | 241 |
| AgamOr49  | IGIIVYNTLYQLVSRGVRELK---SLD-----        | 248 |
| AgamOr61  | TSVQFTVMRRLKQRMETLAASGHSSTQ-----        | 250 |
| AgamOr62  | QOLEETLVP-----TGVMDDQNEW-----           | 248 |
| AgamOr63  | EEVER-----SDRLESDFGDSAD-----            | 243 |
| AgamOr60  | ERIDECFHKYR---PELNTASAGEREE-----        | 245 |
| AgamOr75  | DSLDDQLQQ-----RREQSQGAPDEE-----         | 251 |
| AgamOr76  | DSLDDQLRQ-----RREQAQGAPDEE-----         | 251 |
| AgamOr78  | DSLDDQLRQ-----RREQSQGAPDEE-----         | 251 |

|           |                                                  |     |
|-----------|--------------------------------------------------|-----|
| AgamOr77  | LTLTIELRILN----DSYAAAPTDPQQ-----                 | 231 |
| AgamOr79  | LTLTIELRILN----DSYAAAPTDPQQ-----                 | 229 |
| AmelOr99  | ILIIHFNSGLFAVCGVQVLEATMNSNL-----                 | 241 |
| AmelOr101 | ILIIHFNSGLFAVCGVQVLEATMNSNL-----                 | 241 |
| AmelOr102 | ILIIHHCSGLFTVCGYQVQKVISNAKS-----                 | 241 |
| AmelOr103 | ILIIHHCSGLFTVCGYQVQVQVTGNAKS-----                | 241 |
| AmelOr104 | MIIIIHSSGMFAMCGYKVQEATKYQNL-----                 | 241 |
| AmelOr98  | IIIIHHVCGLFAVCSYEIQKTVKDLTV-----                 | 240 |
| AmelOr100 | ILIIHNSGMFAVCGYQIQKIFAEK-----                    | 165 |
| AmelOr97  | MLIIHHASGLFAMCGYQIAKATECN-----                   | 191 |
| AmelOr105 | ISIIYHACGLFAACGYQIQKLTQVHTI-----                 | 241 |
| AmelOr109 | VQIVVHGCALLAISGYHFKHAVDDVKFC-----                | 229 |
| AmelOr110 | VQVVHGCALLAISGYHFKHAVDDVKIC-----                 | 229 |
| AmelOr111 | VYIVVHGCALLAISGYRFBKHAVDDIKLC-----               | 229 |
| AmelOr108 | VQIVVHGCALLAISGYHFKHAVDDMKFS-----                | 229 |
| AmelOr107 | IHVVHGCALLTISGYHFKHAMDNVDLC-----                 | 229 |
| AmelOr112 | VYAVQHACGLLAIKRYRFBKHVCKNLK-----                 | 227 |
| AmelOr113 | MVVFVQHVCGLLAVAGYRFBKHVCKNLK-----                | 228 |
| AmelOr106 | VYVVQHACGLLTLAGYRFRNSLNDLYS-----                 | 226 |
| AmelOr122 | IFSYYIC-RQFNIVNYRIRKIIDLS-----                   | 227 |
| AmelOr125 | IFSYYVC-RQFNIVNYRIRKIIDLS-----                   | 226 |
| AmelOr123 | IVSYYIC-RQFHIVCYRIRKIIDLS-----                   | 224 |
| AmelOr126 | IFSYYIC-RQFHIVCYRIRKIIDLS-----                   | 224 |
| AmelOr127 | IVSYYIC-RQFHIVSYRIRKIIDLS-----                   | 224 |
| AmelOr128 | IFSYYIY-RQFDIVSYRIQKIIDLS-----                   | 224 |
| AmelOr129 | IFSYYVC-RQFDIVSYRMRKIIDLS-----                   | 224 |
| AmelOr133 | IYIYHTS-ILFKIISHRIQKIITYL-----                   | 127 |
| AmelOr134 | IYIYHTG-VLFKIIISHRIQKIITYL-----                  | 223 |
| AmelOr131 | LYSYHTG-MLFKIISYRIRKIIDLS-----                   | 225 |
| AmelOr132 | LYSYHTS-MLFKIISYRIQKIIDLS-----                   | 225 |
| AmelOr135 | LYSYHIS-VLFKIIINHRIQKIITYL-----                  | 223 |
| AmelOr136 | LYSYHTS-IMFKIIGHRIQKIVKYL-----                   | 225 |
| AmelOr138 | LYCFHAN-ILFKIISYRIQKIVTYL-----                   | 131 |
| AmelOr130 | IYSYYIC-ILLKIVSYRIQKIIMYLA-----                  | 225 |
| AmelOr137 | LYCFHAS-ILFKIISYRIQKIVTYL-----                   | 224 |
| AmelOr139 | LYTIVTTSLFFKIIIGYRIQKIITXL-----                  | 147 |
| BmorOr20  | SLMISTVSGHFRILIHNLTPFLPEAITASKKFVDKHR-----       | 264 |
| BmorOr3   | SLMISTVSGHFRILIHNLTPFLPEAITASKKFVDKHR-----       | 264 |
| BmorOr18  | SLMISTVSGHFRILIHNLTPFLPEAITASKKFVDKHR-----       | 264 |
| HvirOr6   | SLLVFNLWGHFKILISTLNEFRP-----SSKSVDTQ-----        | 264 |
| BmorOr23  | SLMIICLWGLRIFIHNLNHPAP-----                      | 251 |
| BmorOr16  | SLMIICLWGLRIFIHNLNHPAP-----                      | 251 |
| BmorOr4   | SLMIICLWGLRIFIHNLNHPAP-----                      | 250 |
| BmorOr5   | SMMIHLWGLRIFIHNLNHPAP-----                       | 251 |
| BmorOr22  | SLLILHLWGLRILNLLKTFPKPY-----                     | 258 |
| BmorOr17  | SLLILHLWGLRILNLLKTFPKPY-----                     | 258 |
| BmorOr1   | CLMVMHVWGHKLILSHNLINFRPKA-----                   | 255 |
| BmorOr1a  | CLMVMHVWGHKLILSHNLINFRPKA-----                   | 255 |
| BmorOr1b  | CLMVMHVWGHKLILSHNLINFRPKA-----                   | 255 |
| BmorOr19  | FIAVFHVVAHIQILKNNVKS-----                        | 246 |
| BmorOr15  | FIAVFHVVAHIQILKNNVKS-----                        | 246 |
| TcasOr5   | SLLNCTKFESAQVVKELG-----                          | 208 |
| TcasOr7   | AKILIDFFYASTDVFYGTAS-----                        | 215 |
| HvirOr4   | SLLVDTMTGREHVVIKRTASGEPRLIV-----                 | 233 |
| BmorOr13  | SIDTLAFVVTKRVRFPPTAGWMDQR-----                   | 279 |
| DmelOr10a | FEFCAHLSALFEVLQAEIESMFRPYTDHLELS-----            | 248 |
| DmelOr33c | PLTLCLLAGHVHLWSIRMGQLGYFDDDET-----               | 225 |
| DmelOr7a  | VIIYLVVRIQVQLLARRVEKLGTDSDSQVEIYP-----           | 245 |
| DmelOr22c | ICSCLYICGAFRLVQQDIRRIFADLHG-----                 | 238 |
| AgamOr1   | SGLMLHINGQIVRLGSMVKKLGHVPPERQLVATDAEWKEMRKR----- | 250 |
| AgamOr4   | CCSIGHCTLYTRMTIEMVEQLESMA-----                   | 236 |
| DmelOr47b | ISTFLQTALNLKLLCIEIRKLGDMESV-----                 | 254 |
| AmelOr73  | AGLMIQAGVQFEIFCHRAQNLP-----                      | 216 |
| AgamOr68  | SLYVDILRFHLDSETSELLASPGYQTRNS-----               | 235 |
| DmelOr59a | AVVLCLISSHIKMLYNRFEEVGLDPA-----                  | 224 |
| DmelOr23a | PLVLYLISEQCQLLILRISEIGYGYKT-----                 | 219 |
| AgamOr31  | GTFSSCLVAHFVIIQERFEGLRFDDG-----                  | 221 |
| DmelOr2a  | PAFLCCLLTGHMRALELRVRRIGCRTEKSNKG-----            | 233 |
| AmelOr62  | FSLTMHLGQFEILKTRIAKIEFVDR-----                   | 244 |
| AmelOr121 | GILILHICGQLTNLRFQLANIKESSEAS-----                | 241 |



|           |                                                             |     |
|-----------|-------------------------------------------------------------|-----|
| AmelOr140 | NVTDHLLLEKYKNITLLSKDEKK-----                                | 206 |
| TcasOr12  | SGTIMVISTQLSLLKDGLENVARNIKHD-----                           | 233 |
| AgamOr8   | CAIVLLLLCLQFDIVAYRLSHALPDDH-----                            | 241 |
| BmorOr9   | CVMTSLVCNNSLISFKLQVMNRN-----                                | 226 |
| AgamOr40  | MVFFVVCQFDMCLCCSLSNVRQSAMILNGGYGPELRDYQDNYELDTRDYVLQEVFREDL | 273 |
| TcasOr63  | WKLITLASAQFEILKENLTKIDYEGG-----                             | 224 |
| TcasOr4   | TILITLGSAQFDILKIRLENITSVDTS-----                            | 218 |
| TcasOr13  | GEDFTIVRIDRKKINSIVDTLKVKKKQ-----                            | 243 |
| AgamOr24  | IYNLLTAYGQLDVLMTITEELNEQLERN-----                           | 221 |
| AgamOr54  | GYTLNYGFQMLETTLMVIGIISSES-----                              | 215 |
| AgamOr23  | LVLIMNATGQMDVIVYLKQLTLLIDNNHTG-----                         | 228 |
| AgamOr64  | TTTLKQAANEEQQQQHQHVAVDIRCAJR-----                           | 253 |
| DmelOr82a | ISFAINLRAHFQTLQRQIENWEFSPSE-----                            | 230 |
| AmelOr116 | TGFIIITCCQLTILKKCIARNNNINIEK-----                           | 236 |
| AmelOr160 | VTLTFHLCSQLSIVAYRMRNVNIEPK-----                             | 234 |
| TcasOr10  | GICFGLFLISKEGLPTEPERLSKYFP-----                             | 201 |
| TcasOr26  | SETIEHLILRVEDLKILFPKIVAERSP-----                            | 218 |
| AmelOr117 | MTIILHVSQGFKLINIWINNIGIEINC-----                            | 239 |
| AmelOr120 | ATALLHTCGHFTVLKENLKNLDTYIYDLTKTNLKTN-----                   | 237 |
| BmorOr7   | ATILGQCKTQFTILRIKFETLPTRAKQALRCD-----                       | 229 |
| AgamOr6   | CILAAHLCMQFRILAHNFVGHVVEVANG-----                           | 241 |
| DmelOr45a | SWLTHNVVIQFQLELVLEEKDLNGG-----                              | 226 |
| DmelOr67d | FLFVTHVPLIKDIFCVKLTFFNELVMKR-----                           | 236 |
| DmelOr83c | FLGLTQILTFADMLQVKVKELNDALEQKAERY-----                       | 235 |
| AmelOr162 | KFQLILTYLFFFLIFQISRFLS-----                                 | 230 |
| HvirOr3   | CSMIMYLCDQLTHLQTELRDLTYVKES-----                            | 111 |
| TcasOr20  | CGVLIIHITVQLQCLRKIILDLQVND-----                             | 230 |
| AgamOr11  | VTLMIYGRTECSVLNHRLCFLERYHTAGKDD-----                        | 262 |
| DmelOr56a | TCLMKYVNLKQLILNKRVEEMDITRLNSKLVIG-----                      | 255 |
| AgamOr28  | STLVMHIKMMFKVLKFEIEQLGLDLASG-----                           | 260 |
| AgamOr58  | SLEFYWLGQEFQVFAQCNTFAATARKR-----                            | 229 |
| AgamOr59  | ELLATCLGELFETVERQVKEEGPTGRPD-----                           | 245 |
| DmelOr1a  | GWALGVSLQYRRLGQQLKRIPSCFNP-----                             | 232 |
| DmelOr13a | GFFITYTCGQFHLLHQRIAGLFAQSN-----                             | 238 |
| AmelOr161 | LVVIIHSGKFAVLRRRMEALNGADPN-----                             | 232 |
| AmelOr141 | ALFILIICGYFDTIQSRIENLHSFDTSLSSLLNLSR-----                   | 260 |
| AgamOr52  | LLVEFAFDGLLERVERHVQAGAQESP-----                             | 216 |
| AgamOr36  | MGLYDELTSIAQEYGRLLTKEKNGQAD-----                            | 238 |
| AgamOr25  | VLSILAAVHQIKLLKITIQLDGAEQ-----                              | 211 |
| AgamOr45  | IVALLNICTRIAALQLLLEELDAKLG-----                             | 230 |
| TcasOr3   | ITIMSCISSHLKILQGAFKTVRARCIMR-----                           | 250 |
| DmelOr88a | NVMQGHVLMHLGHLARQFSAIDPRQSLTD-----                          | 247 |
| AgamOr22  | YLFVCYSASQLEILIVYLRQIGERPDN-----                            | 235 |
| DmelOr49a | MCVSSQISMHLGYLANMLASIRPSPETE-----                           | 240 |
| DmelOr85f | LYFQVQINLHFRGIIRSLADHKPSVKHD-----                           | 237 |
| AmelOr119 | TMLLDALSVNFENCNGETKRTICNRHGKEER-----                        | 253 |
| DmelOr63a | IVLCLHSVGLMRSLNQMVQATSELVPP-----                            | 261 |
| DmelOr67b | VVLTRYESGLIKVLRFLVQNSTSDILVP-----                           | 262 |
| BmorOr21  | GLCINHAACKMKLYCRALEDAMRSESR-----                            | 242 |
| BmorOr11  | PIFVLHACGQLDLLSLRITKLFSDTKNP-----                           | 241 |
| BmorOr12  | KYQYKILCSYFESLNKIFDDETSSHEVK-----                           | 244 |
| AgamOr33  | RPVDTGPGVQCDSTPAVAVVSIKTR-----                              | 218 |
| HvirOr1   | ICMSYYLTSRLEQVNRKLLAAQGYLP-----                             | 258 |
| HvirOr5   | LAKVCELEKQHKDSKKIEAVKVY-----                                | 180 |
| TcasOr1   | VKCVSNYTKQQSKIHLIVRSVFTTY-----                              | 193 |
| TcasOr2   | VVVNQIGGIVTYFSTNLPKRETEVRK-----                             | 220 |
|           |                                                             |     |
| TcasOr16  | HFRG--GALQNFSGSGVGN-----GLTKKQELMVRSAIKYWVERHKHVRLVTAI      | 344 |
| AmelOr2   | TFRP--TAGMFTN--GGVGN-----GLTKKQEMLVRSIAIKYWVERHKHVRLVTAI    | 347 |
| AgamOr7   | QFRAP--STLQTFDENGNGN-----PNGLTRKQEMMVRSAIKYWVERHKHVRLVSAI   | 347 |
| AaegOr7   | QFRAP--STLQTFDNGINGN-----PNGLTKKQELMVRSAIKYWVERHKHVRLVSAI   | 331 |
| DmelOr83b | QFRAP--STLQSFGGNGGGLVNGANPNGLTKKQEMMVRSAIKYWVERHKHVRLVAAI   | 355 |
| BmorOr2   | TLRGAGGKLQNFNAEN--NPN-----GLTAKQEMLARSIAIKYWVERHKHVRLVASI   | 341 |
| BmorOr2a  | TLRGAGGKLQNFNAEN--NPN-----GLTAKQEMLARSIAIKYWVERHKHVRLVASI   | 341 |
| HvirOr2   | TLRGAGGRLQNFQGNPNPN-----GLTPKQEMLARSIAIKYWVERHKHVRLVASI     | 341 |
| AgamOr56  | KLKT-----FIALHDSVLRSAETL                                    | 264 |
| AgamOr57  | KLKT-----FIALHDSVLRSAETL                                    | 264 |
| AgamOr26  | KFKT-----FIALHDSVLRSAETL                                    | 264 |
| AgamOr27  | EFEK-----FSTLHDSVLRSAETL                                    | 264 |

|           |                                                              |                       |
|-----------|--------------------------------------------------------------|-----------------------|
| HvirOr9   | KFKE-----LAVRHIELMRCVNL                                      | 268                   |
| HvirOr7   | KFTE-----LLKWHQDI IYSSTIL                                    | 252                   |
| DmelOr85b | FLVD-----IVRYHERILRLSDAV                                     | 258                   |
| DmelOr85c | FLAK-----TVQYHQRLRLMDVL                                      | 257                   |
| DmelOr85d | FLQA-----TVAYHQSLLHLCQDI                                     | 280                   |
| DmelOr67a | KLQS-----LVANHIDILRLTDL                                      | 276                   |
| DmelOr67c | FLIG-----IIRYHDKCLKCEHV                                      | 272                   |
| DmelOr92a | YLHN-----LVVYHARALDLSEE                                      | 277                   |
| DmelOr69a | ELSI-----LIAHHSRILQLGDQV                                     | 264                   |
| DmelOr69b | QLKY-----LIVYHTKLLNLADR                                      | 264                   |
| TcasOr6   | -----NKVYSVMLLNQHLCSLFVQLTQVMDKV                             | 246                   |
| TcasOr11  | -----GHVT-----KYVPYVI                                        | 242                   |
| AgamOr41  | -----IGCKLRSILRNQQRLIRFIANI                                  | 257                   |
| AgamOr42  | -----VRDQLVKIIQLQQUESTKYITHI                                 | 262                   |
| AgamOr43  | -----TSVKLKLREIVLLHQRVLEYEDDL                                | 259                   |
| AgamOr44  | -----TPVKLKLREIVLLHQRVLEYEDDL                                | 259                   |
| AgamOr66  | -----VYKTFCRQRMRAIYQYHQSVIFYLES                              | 263                   |
| AgamOr67  | -----VYKTFCRQRMRAIYQYHQSVIFYLES                              | 263                   |
| AgamOr72  | -----EHSALRHKWVQCMHDHQSTSFSTI                                | 259                   |
| AgamOr73  | -----EHSANVRHKWIQCMHDHQSTSFSTV                               | 259                   |
| AgamOr71  | -----EHTEDIRRKWVQCMHDHQSTSFSTI                               | 259                   |
| AgamOr74  | -----ERTAEIRRKWIQCMHDHQSTSFFTMI                              | 259                   |
| AgamOr70  | -----KNQSSVREKWVQCMFEHQQTTFNLNSI                             | 259                   |
| AgamOr69  | -----KQTSIMRQKWIQCMQDHDQATSFNLNT                             | 263                   |
| TcasOr9   | -----DSFN-----EEIFEIMNSAKFKNNARY---                          | LRKNVKHHQQLLYCADV 165 |
| TcasOr18  | -----HEFRSFYIKYGNIFKILNNAKFQTLNRAF---                        | LKRNIKHHKLLRRCEDL 276 |
| DmelOr83a | ----DVEP--GQYAYSVEEETPLQELLVKVGSSMDFSSAFRLSFVRCIQHHRIVAALKKI | 317                   |
| DmelOr85e | ----DSKRELNQYVLLQEHPDLDLRLSAGRKCPOGNAFHNALVEICIRLHRFILHCSQEL | 328                   |
| TcasOr24  | -----RRRLNECIKYHKEIISYSEIF                                   | 255                   |
| TcasOr25  | -----RERLDFCIRYHNVIDFSERF                                    | 255                   |
| TcasOr19  | -----RKRLNDCVQYHIDIISYSERF                                   | 220                   |
| TcasOr22  | -----EKRLHLCIRYQQHIIRTNELF                                   | 253                   |
| TcasOr23  | -----EQKLLHLCIRYQQHIIRTNELF                                  | 253                   |
| AmelOr168 | -----TIRQEMKLLIRHFETVIEMTGIL                                 | 256                   |
| AmelOr170 | ----RN-----DNVRQEMKLVTRHFETVIETTTIL                          | 264                   |
| AmelOr169 | ----WQNV-----PCEYDKMVKQEMKLLTRHFEIVVEMTML                    | 270                   |
| DmelOr65b | -----LQELRMETNRLVKLHQKIVEILDRT                               | 252                   |
| DmelOr65c | -----YEQLRLETNRLVQFHQKIVHILDHT                               | 252                   |
| DmelOr65a | -----EDMLYRELCRMTKFHQQIILLTDRC                               | 284                   |
| TcasOr17  | -----NSKEIGKNLVKICIEHHREILR-----                             | 243                   |
| TcasOr21  | -----GCS-IERDLITCIKHHQEILK-----                              | 240                   |
| TcasOr56  | -----IERIELLDKRTQDYVAKYANECVYHHQELIALCDHA                    | 301                   |
| TcasOr15  | -----INRIEMLDGTVFVEKCANECVYHHQELIALCEHA                      | 295                   |
| AgamOr9   | -----SVPKSDADVYNELLQCIIFHQEVTGFLREV                          | 284                   |
| AgamOr65  | -----SVPKSDADEVYNELLQCIIFHQEVTGFLREV                         | 287                   |
| BmorOr6   | -----SRNRSELHEKNNGILIDCIKHHQAIVRFSELC                        | 257                   |
| BmorOr10  | -----QKQ--EVLNSNYELLVCEVRRYQSVVRFIELT                        | 254                   |
| AgamOr34  | -----EFDRSFVPLVQHYNKIHRMLCRV                                 | 245                   |
| AgamOr37  | -----QFRESFVGLMNHGKVRMTAEI                                   | 257                   |
| DmelOr94a | -----IFGQQLRAIFIMHQIRSLTLTC                                  | 253                   |
| DmelOr94b | -----AR-PELRRIFQLHTKVRRLTREC                                 | 249                   |
| DmelOr71a | -----DLREKFLLEIHLHQRLKQQALSI                                 | 244                   |
| DmelOr46a | -----TVEQQLKENIRYHMTIVELSKTV                                 | 248                   |
| DmelOr46b | -----KIAMELRECAAYNRIVRFKDLV                                  | 248                   |
| HvirOr8   | -----SRQHRDNHKEAIKKINHCI IHYEKIHKYCSLV                       | 264                   |
| BmorOr8   | -----DRGLMN--ITEVLKLNELKHYELVLKYCSTV                         | 260                   |
| AmelOr68  | -----NVENRLNIGKIVYFHNLYGYAFMV                                | 242                   |
| AmelOr69  | -----HEKNEVTK-LCIHYHNLIYRLATTI                               | 237                   |
| AmelOr70  | -----QDESNYSAKQCVKHYHQIYKFSRTL                               | 240                   |
| AmelOr71  | -----SDK-NYTMKQCVRHHNHLYKYGEMV                               | 239                   |
| AmelOr72  | -----EDA-IQSLKYCARQHELIYRFTELM                               | 240                   |
| DmelOr19a | -----MQAILVGYIHDHQIILRLFKSL                                  | 251                   |
| DmelOr19b | -----MQAILVGYIHDHQIILRLFKSL                                  | 251                   |
| DmelOr33a | -----NTRKLIIEGIQDHRKLMKIIRLL                                 | 246                   |
| DmelOr33b | -----TGKQLIESIEDHRKLMKIVELL                                  | 248                   |
| DmelOr22a | -----YLEELTECIRDHRLLLDYVDAL                                  | 261                   |
| DmelOr22b | -----YLKELADCVRDHRLLLDYVDAL                                  | 261                   |
| DmelOr42b | -----SYEELVKCVMDHKLILRYCAII                                  | 261                   |
| DmelOr59b | -----NYQDLVNCVLDHKTILKCCDMI                                  | 262                   |
| DmelOr59c | -----HYEQMVACIQDHRTI IQCSQII                                 | 264                   |

|           |                                        |     |
|-----------|----------------------------------------|-----|
| Dme1Or98a | -----NEQDLIKCIKDHNLIIIDYAAA            | 259 |
| Dme1Or42a | -----KYERLVQCIQDHKVIILRFVDC            | 264 |
| Dme1Or85a | -----HYAELVECVKDKHLIVEYGNL             | 259 |
| Dme1Or43b | -----MFKSLVDCIKAHRTMLNFCDAI            | 264 |
| AgamOr2   | -----GHSAGTLFAELKECLKYHKQIIQYVHDL      | 247 |
| AgamOr10  | -----ESTVVLNRKLQKLIEDHKRIIRYVQDL       | 244 |
| Dme1Or30a | -----NEQVRGEI IWCIKYQLKLSGFVDSM        | 246 |
| Dme1Or49b | -----DPRELREEI IACIRYQQSII EYMDHI      | 244 |
| Dme1Or43a | -----SEERFQRLASCIAYHTQVMRYVWQL         | 244 |
| AgamOr32  | -----DLSAAQPYAEHQLRNVITYHREVL SLAQKM   | 247 |
| AgamOr35  | -----DFAART--AEDELEV VVAYHKDVLQCLAM    | 257 |
| Dme1Or47a | -----KGGSLKE-SQATLNKVFALYQTSLDMCNDL    | 250 |
| Dme1Or98b | -----EGRNTKE-THENLKHVFQLYALCLNLGHFL    | 251 |
| Dme1Or9a  | -----PAVGGKE-ELEGLVQVLLHQLGLQIADHI     | 262 |
| AgamOr38  | -----SSAAETLRINLELRRINKRHQTIIDV VSEV   | 279 |
| AgamOr39  | -----SSAAETHRINLELRRISKRHQAIIDL VSEV   | 280 |
| Dme1Or24a | -----PSEAEEARIVREMEKLVDRHNEVAELTERL    | 259 |
| Dme1Or45b | -----PSLRESKICCCQLADIVDRHNEI EKIVKEF   | 268 |
| AmelOr74  | -----SVAAYTRGCHVALKKCIRRHQSLIEFCNKL    | 262 |
| AmelOr86  | -----KFN-YASKCYEALKECIRQHQS LIEFCDKL   | 261 |
| AmelOr75  | -----GLPRYEKCCYERLKDCCV VQHQT LIEYCKRL | 261 |
| AmelOr84  | -----ESYR-ANVCHAKLRSCVIRHQ TLT KYCKQL  | 258 |
| AmelOr87  | -----SWSSCMENCYATFKLCVKQH QDRIT YCHRL  | 286 |
| AmelOr76  | -----EESALSFYEYSK LKAYIRQH QALIEYCKKL  | 264 |
| AmelOr85  | -----KSPYLSICKYAKLKIYIRQH QTLIEYCKRL   | 269 |
| AmelOr88  | -----SSKYCINEYKSFKTCVQQHQALIEYCKKL     | 267 |
| AmelOr91  | -----DSL YFSNKCYTTFKKYIRQH QAL IAYCRKL | 268 |
| AmelOr92  | -----DSLHFSNKCYTTFKKYIRQH QTL IAYCRKI  | 265 |
| AmelOr95  | -----DSCYFASKYYAIFKKCIRQH QAL IAYCRKL  | 264 |
| AmelOr93  | -----DSX--ATKCYAIFKXQH QAL IYLIYCRKL   | 252 |
| AmelOr77  | -----NTSYFAKKCYEAFKKCIREHQAL IAYCEKL   | 267 |
| AmelOr94  | -----ENMNSSNRCYAILKNCIRYHQAL IQFSITL   | 263 |
| AmelOr96  | -----ANKNSSDECYKAFKNYVQQHQAL LDFCETL   | 263 |
| AmelOr79  | -----TLTKQMHKFYEQFKECVRHHQAL IDYHQNL   | 263 |
| AmelOr83  | -----TFAKQVYKFYEQFKKCVRYHQAL IDYQNL    | 268 |
| AmelOr80  | -----ILSKQMHKFYEKFRKCVQHHQAL IDFYQNL   | 266 |
| AmelOr81  | -----ILSKQMFKFYEKFKKCVQHHQAL IDFYQNL   | 263 |
| AmelOr82  | -----ILANRVPKFYEKFRKCVQHHQAL IDFYQNL   | 265 |
| AmelOr78  | -----ILEEQMQKFHEKFKKYVRRHQAL IDYHQKL   | 265 |
| AmelOr89  | -----AHAREFYDRFKARVPYHQAL IDYCEKI      | 262 |
| AmelOr90  | -----LSKHVHTCYEKFKYVRYHQAL INFYTKL     | 263 |
| AmelOr142 | -----DGEFDACIKKHDEL LRY SREI           | 239 |
| AmelOr146 | -----IESLIKIEKYAIRRYAE E V             | 239 |
| AmelOr148 | -----IDMLIVCFKLL L L RRYAE E V         | 236 |
| AmelOr158 | -----IDMLIVCLKLL L L RRYAE E V         | 237 |
| AmelOr147 | -----IEMLIVCLKQL L L RRYAE D V         | 237 |
| AmelOr150 | -----ISMLIVCIKKQL HIRRYAKKV            | 239 |
| AmelOr151 | -----IGMLIACVKKQL RIRRYAKKV            | 239 |
| AmelOr152 | -----IGMLIVCVKKQL HIRRYARRV            | 239 |
| AmelOr154 | -----IDMMIACIKKQL Q L KRYAE E I        | 239 |
| AmelOr155 | -----IDMVIACVKKQVQL RSYAKEV            | 239 |
| AmelOr157 | -----VDTLVVCLKHSRLKRYAE E V            | 236 |
| AmelOr156 | -----KDMMVICIKKQL QIRRYAKEI            | 239 |
| AmelOr153 | -----INMLIVCX-----YAKKM                | 215 |
| AmelOr144 | -----YDMLVSCIKEHQKILGFVEDT             | 240 |
| AmelOr145 | -----YDMLVSCIKEHQKILGFVENS             | 241 |
| AmelOr143 | -----YDTLVVSCIKEHQKILGFVEDT            | 235 |
| AmelOr1   | -----NRDLHDRVIDIVQSHLKAIEYSARV         | 266 |
| AmelOr3   | -----NRDLRGRADI IQSHLKAIEYSALV         | 269 |
| AmelOr6   | -----SENTMQKRIVDIVEYQTKIKRFLGNT        | 261 |
| AmelOr7   | -----SENTMQKRIVDIVEYQTKIKRFLGNT        | 261 |
| AmelOr4   | -----SEKIMQQRIVDIEYQTRIKRFLSNT         | 263 |
| AmelOr5   | -----SENI IQEKIVEIVEYQTKIKRFLGNA       | 263 |
| AmelOr8   | -----ERVVQEKIVHIVEYQTRIKEFLNHV         | 263 |
| AmelOr9   | -----EKVVQEKIVYIVQYQTRIKEFYNYV         | 263 |
| AmelOr11  | -----EQVVQEKIVHIVEYQTRIKEFLNQL         | 261 |
| AmelOr12  | -----EKVVQEKIAHIVDYQTRIEFLNDL          | 263 |
| AmelOr10  | -----ERVVQEKIVHIVEYQMKIKEFLKQI         | 262 |
| AmelOr14  | -----NEVVVHEKIVDIVKYQTKVKGFLKNV        | 265 |
| AmelOr15  | -----NESAVHMKITDIVRYQTKIKQFLNDV        | 266 |

AmelOr13 -----CEIIVRKKLADIVEYQMKIIDFLNHV 257  
AmelOr16 -----SEVTLQRKIMDIVEYQMKIKRFLKNI 268  
AmelOr17 -----SEVVLQRKIMDIVEYQMKIKRFLKNI 268  
AmelOr18 -----NDNENL-DQRLANIVKQHVRIINFIALT 277  
AmelOr19 -----NDDENL-DQRLVNIVEQHVRIINFITLT 277  
AmelOr22 -----DMYNNV-DSRIASIVSQHVRIILKFLALT 278  
AmelOr24 -----DMYNNV-DSRIASIVNQHVRIILKFLALT 270  
AmelOr20 -----DMDERL-DGRIADVIRQHVRIILKFLALT 274  
AmelOr25 -----DMSKAI-DDRIANIVIQHDIRILKFLALT 269  
AmelOr29 -----DMSKKI-DDRIANIVIQHDIRILKFLALT 270  
AmelOr30 -----DMNKIV-DKRIAKIVVQHDIRILKFLALT 270  
AmelOr21 -----DMCYSV-DQRIAKIVSQHVRIILKFLSLI 270  
AmelOr23 -----DMCNSI-DQRIATIVNQHVRIILKFLSLI 270  
AmelOr35 -----KDMENIVHEQRLGNIVEHHLHILGFISQI 279  
AmelOr27 -----NQKKTDDFKEIGIIVERHHLRVLNFITYL 272  
AmelOr28 -----KREK-MIFREIGLIVEHHLRITLNFISCI 272  
AmelOr33 -----VNNKNVGLDKISNIVRHHLRILSFITGI 274  
AmelOr34 -----IQDKNIVLNDIGEIRHHLKILSFITGI 274  
AmelOr32 -----KIHDKNIGLNKIGKIVRHHLRITLSFVTGI 274  
AmelOr31 -----DNNKNVVINEIGEIVEYHLRILNFIEGI 273  
AmelOr36 -----QKENKN-RIDEISVIEHHMRILSFLERA 270  
AmelOr37 -----QKENKN-RIDEISVIEHHMRILSFLERA 271  
AmelOr38 -----QEENKNVHIDKISVIEHHMRILSFLERA 272  
AmelOr39 -----QEENKNVHIDKISVIEHHMRILSFLERA 272  
AmelOr47 -----QKQKNIRIDEISVIEHHLRILSFLERT 271  
AmelOr48 -----QKQKNIRIDEISVIEHHLRILSFLERT 271  
AmelOr40 -----QEENKNMRVNEISVIEHHLRILSFLGRT 271  
AmelOr43 -----QEENKNMRVNEISVIEHHLRILSFLGRT 272  
AmelOr45 -----QEENKNVRVEEISVIEHHLRILSFLERT 271  
AmelOr41 -----QEEKKNMRINEISVIEHHLRILSFLERT 271  
AmelOr42 -----QEEKKNMRINEISVIEHHLRILSFLERT 271  
AmelOr44 -----QEEKKNMRIDEISVIEHHLRILSFLGRI 271  
AmelOr46 -----IDLNN-VYVNKISIVEHHLRILSFITHI 270  
AmelOr49 -----KKLNNNAYINKIGIVEHHLRILSFIARV 271  
AmelOr50 -----RKENKDNHINKIGIVEHHLRILSLIARI 273  
AmelOr26 -----KKQDEQTLHKKLGFIVEHHLRITLSLVWYM 279  
AmelOr53 -----EKRYKDCDFALIVHDHVEILRFSNNI 277  
AmelOr54 -----ERKKYESC�LFALIVHDHVEILRFSNNI 275  
AmelOr52 -----DKK--NNCDPFALIVHDHVEILRFSKNV 272  
AmelOr51 -----KVLETGIESHLAVVVKNHVEILRFAKNV 274  
AmelOr55 -----YKKN SNPNIQVIKIKHHIKILKFSAVV 273  
AmelOr57 -----YKKN SNPNIQVIKIKHHIKILKFSAVV 273  
AmelOr56 -----YSKNLNPDIRLMGIEHHIRILKFSAVV 273  
AmelOr58 -----SKENSNPNIRLIEIEHHIKILRFSAMV 275  
AmelOr59 -----SKEKINLNARFTKIEHHLRILRFSATV 276  
AmelOr60 -----GKGKFNLNARLIKIVEHHLQILRFSATV 276  
AmelOr61 -----TKNTFNLNTRLVKIVKHHLRILRFSESI 276  
AmelOr63 -----RTTKHITLLIKRHIYLLKLGDM 262  
AmelOr64 -----RATKDIILLTKRHIYLLKLSDM 258  
AmelOr66 -----RTMKHISLLTRRHIYLLKLSDM 258  
AmelOr65 -----KITEHFILLIKRHIYLLNLSKML 258  
AmelOr67 -----RTMEHILLTKRHIYLLNLSKML 258  
AmelOr114 -----TYDKKDLKRLKEIVQKHEYVNRFAETI 232  
AmelOr115 -----RNDYKTFEQRLSSIVNRHNLRSRFAVIV 255  
AmelOr118 -----KRESQ--D-TIKDIVRHQKIIQLSKNI 237  
AmelOr164 -----EQELR--IRIKKLIAKHQRTLNLSENI 249  
AmelOr163 -----HKGKT--SYILKNIIVKHQIRLRLSENV 251  
AmelOr165 -----SH-----LKFFIIRYQEIIITFAERV 241  
AmelOr166 -----KK-----LKFFIKRHQEIILLAEKI 241  
AmelOr167 -----KPES--RIIKSLIDRHYRIIGSEYI 253  
DmelOr35a -----DRPHMAKQLKVLITKTLRKNVALNQFGQQL 266  
DmelOr74a -----SSLNVAIAYRLNLTHILRRNAALRDFGQVR 267  
AgamOr3 -----VAQDRAEKELNEIISMHQVRLNCVFL 278  
AgamOr5 -----LDERAEKELIEIIVMHQKALKCVELL 259  
AgamOr13 -----EDNTFNRQEVKSIVVMHQDALNCASLV 258  
AgamOr15 -----QDNTF-RQELKSVIKMHQDALNCASLV 257  
AgamOr17 -----QDNTF-RQELKTVIKMHQDALNCASLL 257  
AgamOr16 -----RSQNY-ASDIRSAIQMHQSALSADVL 255  
AgamOr55 -----RTVPSDRDSIRTIVAMHQALCCADLL 258  
AgamOr18 -----PDVRQRSDBGMEVWVLHQRALRCAELL 265

|           |                                                     |     |
|-----------|-----------------------------------------------------|-----|
| AgamOr14  | -----PNQKSIREELHDI IHVHQRTLNCITLL                   | 278 |
| AgamOr51  | -----PKQKSIREELHDI IKVHQRTLDCIALL                   | 266 |
| AgamOr12  | -----ISPENIDLELKKLIQMHQLAIRCVALL                    | 268 |
| AgamOr19  | -----ISPENIDLELKKLIQMHQLAIRCVALL                    | 268 |
| AgamOr20  | -----ATSNAIDRELKQVIQLHQRAVRCVALL                    | 268 |
| AgamOr21  | -----TSSEAIGRELKKVIQLHQLALRCVALL                    | 265 |
| AgamOr50  | -----VSPAIDRELKKKLIQMHQLAIRCVDLL                    | 267 |
| AgamOr29  | -----ISQAQLSVVIKSHRDTLLCAQYL                        | 256 |
| AgamOr53  | -----ITQERLNRVIKSHSNALSQCATQL                       | 246 |
| AgamOr30  | -----ASQAKLEAI IHSHRSTLKCQAQL                       | 257 |
| AgamOr46  | -----D---QYTAELSEI IELHQLVIKCSRQL                   | 257 |
| AgamOr47  | -----D---KYTAELNEI IELHQLAIKCSRQL                   | 257 |
| AgamOr48  | -----GLLAQKHRRLLQIVQLHYRAIECTKLL                    | 268 |
| AgamOr49  | -----PTTTQFRHRLTEI IDQHGAATRCKLL                    | 275 |
| AgamOr61  | -----VFWSILQPELNSHISRHVLLDNLKEF                     | 277 |
| AgamOr62  | -----EYWDNLQQLRTHRIKRHLELLENLRIF                    | 275 |
| AgamOr63  | -----IFWNNIVDQLRPHMQRLDELFIQLQHL                    | 270 |
| AgamOr60  | -----EFWRELQALIKLNVQRHVLELLENLVD                    | 272 |
| AgamOr75  | -----RILRELLYE HARHHSQLIVVVTHL                      | 275 |
| AgamOr76  | -----RILRELLYE HARHHSQLIVVVTHL                      | 275 |
| AgamOr78  | -----RILRELLYE HARHHSQLIVVVTHL                      | 275 |
| AgamOr77  | -----LVAF LKERVVYKAALLQHIRT I                       | 253 |
| AgamOr79  | -----LVAF LKERVVYKAALLQHIRT I                       | 251 |
| AmelOr99  | -----ISKDAFSENSSYEKFRTCVIMHNEVIEFYNIL               | 273 |
| AmelOr101 | -----VSKDAFSENSSYEKFRTCVIMHNEVIEFYNIL               | 273 |
| AmelOr102 | -----FN-GTVLNNTYEQIKNCVIMHDEAIQFYNIL                | 272 |
| AmelOr103 | -----LN-KIVSNNTYEQIRNCVITHDEAIQFYNIL                | 272 |
| AmelOr104 | -----FNDRI ISENNTYEQIKNCVITHDEAIQFYNIL              | 273 |
| AmelOr98  | -----FT---DIEKCSYKELKNCVIKHKKAIKFFYNIL              | 269 |
| AmelOr100 | -----VFSNIHIYEQFKNCLIVHSEAIQFFSIL                   | 193 |
| AmelOr97  | -----DRHNENELFRQCVMTHNKAYKFFEIM                     | 217 |
| AmelOr105 | -----EKNGPNISNIDYEEFKQCVIMHYKCLQLYDVL               | 273 |
| AmelOr109 | -----DGYIDASMDETYVKIRQSIKAHKTAVQYVDKI               | 262 |
| AmelOr110 | -----DENYITL-MDETYTRVRHSIKAHRTAVEYVDKI              | 261 |
| AmelOr111 | -----GGDCIDPLTDETYTKVRQSIKAHKMAVEYVDKI              | 262 |
| AmelOr108 | -----NGNYIDLLMDETYKKVKQSIKAHKTAVEYVDKI              | 262 |
| AmelOr107 | -----NEKYSDELMEKTYAKVSQSIDAHKKA VEYVNKI             | 262 |
| AmelOr112 | -----EDHAIPLEEI KYKSICESIKAHQHALKYLKLI              | 259 |
| AmelOr113 | -----SKNSEEKIKETCKKIRSSIQHGEGAIRYLKKI               | 260 |
| AmelOr106 | -----MRKDSKMDEKI YRMCYAIKTHKRALAYLTKI               | 258 |
| AmelOr122 | -----TRNLS--K                                       | 233 |
| AmelOr125 | -----TPNLS--K                                       | 232 |
| AmelOr123 | -----MPNLP--K                                       | 230 |
| AmelOr126 | -----TPNLP--K                                       | 230 |
| AmelOr127 | -----MSNLP--Q                                       | 230 |
| AmelOr128 | -----MPNLP--K                                       | 230 |
| AmelOr129 | -----MPNLP--K                                       | 230 |
| AmelOr133 | -----MFNLLSNQ                                       | 135 |
| AmelOr134 | -----IDLSSKQ                                        | 231 |
| AmelOr131 | -----MFNVSSKQ                                       | 233 |
| AmelOr132 | -----IVNLSSKQ                                       | 233 |
| AmelOr135 | -----IVNLSSKQ                                       | 231 |
| AmelOr136 | -----MFNLSKQ                                        | 233 |
| AmelOr138 | -----MFNLSKQ                                        | 139 |
| AmelOr130 | -----MFKLSPKQ                                       | 233 |
| AmelOr137 | -----MFNLSKQ                                        | 232 |
| AmelOr139 | -----IFNLSKQ                                        | 155 |
| BmorOr20  | -----CNGNRSEFVLEEAKLYSPAEMWQVTDRLRQCIDYHRKLV EFTGDI | 309 |
| BmorOr3   | -----CNGNRSEFVLEEAKLYSPAEMWQVTDRLRQCIDYHRKLV EFTGDI | 309 |
| BmorOr18  | -----CNGNRSEFVLEEAKLYSPAEMWQVTDRLRQCIDYHRKLV EFTGDI | 309 |
| HvirOr6   | -----ESPKYTEEELIEVAEKLKDCINHYHREIKIFTNRM            | 299 |
| BmorOr23  | -----RNSFEYTKERQEVDLTLKCKIQHHTLIIGFVRIM             | 286 |
| BmorOr16  | -----RNSFEYTKERQEVDLTLKCKIQHHTLIIGFVRIM             | 286 |
| BmorOr4   | -----RNSFEYTKERQEVDLTLKCKIQHHTLIIGFVRIM             | 285 |
| BmorOr5   | -----RNSLEYTREERQEVDLTLKCKIQHHTLIIGFVRIM            | 286 |
| BmorOr22  | -----TNNSMYTEENQVVLKQLQECIRYHNFII SFTVMM            | 293 |
| BmorOr17  | -----TNNSMYTEENQVVLKQLQECIRYHNFII SFTVMM            | 293 |
| BmorOr1   | -----SHVITTPNGPTNVETYTEESKEVFARLRECIKHYGTVD FANDM   | 300 |
| BmorOr1a  | -----SHVITTPNGPTNVETYTEESKEVFARLRECIKHYGTVD FANDM   | 300 |
| BmorOr1b  | -----SHVITTPNGPTNVETYTEESKEVFARLRECIKHYGTVD FANDM   | 300 |

|           |                                                         |     |
|-----------|---------------------------------------------------------|-----|
| BmorOr19  | -----NWSDDFNESEKK---GYLVSILEYHAYIIRIFGEV                | 278 |
| BmorOr15  | -----NWSDDFNESEKK---GYLVSILEYHAYIIRIFGEV                | 278 |
| TcasOr5   | -----KIHKDLNKLAMEV                                      | 221 |
| TcasOr7   | -----ALEVQTSLLLATVL                                     | 228 |
| HvirOr4   | -----SPCDAVRRLAALHGTLCDVVNSI                            | 256 |
| BmorOr13  | -----TIRRLALSYGSICEVVRQI                                | 298 |
| DmelOr10a | -----PVQLYILEQKMRSVIIRHNAIDLTRFF                        | 276 |
| DmelOr33c | -----VVNHQRLLDYIEQHKLLVRFHNLV                           | 249 |
| DmelOr7a  | -----DERRQEEHCAELQRCIVDHQTMLQLLDCI                      | 274 |
| DmelOr22c | -----DSVDVFTEEMNAEVRHRLAQVVERHNAIDFCTDL                 | 273 |
| AgamOr1   | -----IDHHSKVYGTMYAKVTECVLFHKDILRFGEV                    | 282 |
| AgamOr4   | -----AERTASAIRNVGQMHSGLLKCIRLL                          | 261 |
| DmelOr47b | -----DKRFHEEFRCVVRFHQHIKLVGKA                           | 279 |
| AmelOr73  | -----LVLTVTRNSNVFAETV                                   | 232 |
| AgamOr68  | -----PEIMAKVSRKWRMCLVEHQRIVEYYDNF                       | 263 |
| DmelOr59a | -----DAEKDLEACITDHKHILELFRRI                            | 247 |
| DmelOr23a | -----LEENEQDLVNCIRDQNALYRLLDVT                          | 244 |
| AgamOr31  | -----NRELKKLIEHKKYILRISDRV                              | 242 |
| DmelOr2a  | -----QTYEAWREEVYQELIECIRDRLARVHRLREII                   | 264 |
| AmelOr62  | -----RKIGPLVKRHCQLAVLVNDL                               | 264 |
| AmelOr121 | -----NFLIATAIVKDHIRLIRVIELL                             | 262 |
| AmelOr140 | -----VYRKLFCIKNHQNAIKYSNLL                              | 228 |
| TcasOr12  | -----KSSVNKNLIQCACHYRSIQFAAEV                           | 258 |
| AgamOr8   | -----QELVGCVRIHQAVIELCNEL                               | 261 |
| BmorOr9   | -----TAHLLKEVVKEQQYVLKLAEDL                             | 248 |
| AgamOr40  | DTVQG-----TKTASRLDQLSPAQSYLMELAPELTCVMEDCIQHHLILLRFCQLL | 323 |
| TcasOr63  | -----FNETKGALVRCITHHAKLVNYTERV                          | 249 |
| TcasOr4   | -----KSWLVKKAIKKCVIYHTILLKKIFYG                         | 244 |
| TcasOr13  | -----AKCGVTNEQVRDLIIAYQKLTDAANLV                        | 270 |
| AgamOr24  | -----ESLDTIQDKIVEIIRQYQHHRTYLKLQV                       | 248 |
| AgamOr54  | -----AFFMFQQNAQLQVDMRLYKSKSM                            | 237 |
| AgamOr23  | -----QHDEEIADIIKEIVLKHLEHTKYMTDM                        | 255 |
| AgamOr64  | -----SFCKQFYANIRRHTELLQSIATF                            | 276 |
| DmelOr82a | -----PDTQIRLKSIVEYHVLLLSLSRKL                           | 254 |
| AmelOr116 | -----SPSKIYNKFYENLKHCVKHSIIFDFTKQI                      | 266 |
| AmelOr160 | -----IYFPKMKALVERHTELLRLANIL                            | 257 |
| TcasOr10  | -----YIFSFMTQSFTFCMTGTMLS DWS                           | 224 |
| TcasOr26  | -----EVRRKMLAKWVDYHLLWLLSIGKLM                          | 242 |
| AmelOr117 | -----PNYMRKLVDLIKCIRHHQQLIHVVNNV                        | 267 |
| AmelOr120 | -----SKYINKNLYEIKTQIIYI IKHHQLVLWFCDNM                  | 269 |
| BmorOr7   | -----SEQNYDEVLMRLFDCLKHYYQKIVDTTSSL                     | 259 |
| AgamOr6   | -----AREGDSGSTSRLRDAIRIHQELIGYEGTP                      | 270 |
| DmelOr45a | -----DSRLTGFVSRHRIALDLAKEL                              | 247 |
| DmelOr67d | -----NDFPKVRAMLCDLLVWHQLYTRMLQTT                        | 263 |
| DmelOr83c | -----ALVRVGASIDGAENRQRLLLDVIRWHQLF                      | 264 |
| AmelOr162 | -----LRFAKIL                                            | 237 |
| HvirOr3   | -----EMAMRLKFKNAIRKHIRLMGYSGRM                          | 136 |
| TcasOr20  | -----LEILEHKMKFCVKYHTAILDYGIRT                          | 255 |
| AgamOr11  | -----PTAPVNNNAERRSLMIDCIKRQASLVSFTREL                   | 293 |
| DmelOr56a | -----RLTASELTFWQMQLFKEFVKEQLRIRKFLVQEL                  | 287 |
| AgamOr28  | -----KSHVELQAKLKQIILKHKTNLSLIEQL                        | 287 |
| AgamOr58  | -----YWDGLKRRIDTCVIEHQRLGQISTL                          | 255 |
| AgamOr59  | -----SRALYWSTLHGELRRCARHCAIFTMLPKL                      | 275 |
| DmelOr1a  | -----SRSDFGLSGIFVEHARLLKIVQHF                           | 256 |
| DmelOr13a | -----AELAESIQLERLKRIVEKHNNIISFAKRL                      | 267 |
| AmelOr161 | -----SAAIMGDNVIRHQQAIFADTL                              | 254 |
| AmelOr141 | -----KITTAKMSDIKTEASNSVQMRNLRMCVHHQLLNRFCEDI            | 301 |
| AgamOr52  | -----LLWQQFNRELGRVREHCVVVKQVREV                         | 243 |
| AgamOr36  | -----IWTSFERNARAVRRHETFLWQLGQL                          | 264 |
| AgamOr25  | -----AELHRELVRRIQIHRQIQQFIHQV                           | 235 |
| AgamOr45  | -----TVQWQQT AHLDAELNRIIEELHIDTKRFARVI                  | 261 |
| TcasOr3   | -----TRAERLLKEETLHDPFPLENCVNKEMIRKL                     | 280 |
| DmelOr88a | -----EKRFVLDLRLLVQRQQLNLGLCRKY                          | 272 |
| AgamOr22  | -----VQEQRRLMRKVFEIHTGLSQFIARC                          | 260 |
| DmelOr49a | -----QQDCDFLASIIKRHQLMIRLQKDV                           | 264 |
| DmelOr85f | -----QEDRKFI AKIVDKQVHLVSLQNDL                          | 261 |
| AmelOr119 | -----NDNNNRFLDRYKCKVQFHQRLVVISRDY                       | 281 |
| DmelOr63a | -----DRRVEYLRCIIYQYQRVANFATEV                           | 285 |
| DmelOr67b | -----KDQRVKYLQCCVRLFARISSHHNQI                          | 287 |
| BmorOr21  | -----RHEKIVAVIEEQRRTYEYIALI                             | 264 |

|           |                                                              |     |
|-----------|--------------------------------------------------------------|-----|
| BmorOr11  | -----RIIAKELKVIISKLQELYGFVNF I                               | 265 |
| BmorOr12  | -----EAEFENAFNCNGIKIHTQI IWCVRRC                             | 269 |
| AgamOr33  | -----MSLALFSTPERPLLTGSGFCNRRL                                | 241 |
| HvirOr1   | -----EIFWRATREDYCRVTQIVRKV                                   | 279 |
| HvirOr5   | -----TWRKIREAYVKQAMLVRKI                                     | 199 |
| TcasOr1   | -----LMFDYCTVLRVQRFNNYQSLAHYL                                | 217 |
| TcasOr2   | -----KSLDFGKLCSLHHHLSKLIKSF                                  | 242 |
|           |                                                              |     |
| TcasOr16  | GDAYGVALLLHMLTSTIMLTLLAYQATKITGVDKYAATVLG--YLLFA-----        | 390 |
| AmelOr2   | GDAYGVALLLHMLTTTTITLTLAYQATKIHAVDTYAASVVG--YLLYS-----        | 393 |
| AgamOr7   | GDTYGPALLLHMLTSTIKLTLAYQATKIDGVNVYGLTVIG--YLCYA-----         | 393 |
| AaegOr7   | GETYGAALLLHMLTSTIKLTLAYQATKIDALNVYGLTVIG--YLVYA-----         | 377 |
| DmelOr83b | GDTYGAALLLHMLTSTIKLTLAYQATKINGVNVYAFTVVG--YLGYA-----         | 401 |
| BmorOr2   | GDTYGTALLFHMLVSTITLTLAYQATKINGINVYAFSTIG--YLVYT-----         | 387 |
| BmorOr2a  | GDTYGTALLFHMLVSTITLTLAYQATKINGINVYAFSTIG--YLVYT-----         | 387 |
| HvirOr2   | GDTYGTALLFHMLVSTITLTLAYQATKINGINVYAFSTIG--YLSYT-----         | 387 |
| AgamOr56  | EEILSLQMLLLYISTILALCLGMVVLAVNEVYVLLTTMA--VFGYC-----          | 310 |
| AgamOr57  | EEILSLQMLLLYLSTILALCLGMVVLAVNEVYVLLTTMA--VFGYC-----          | 310 |
| AgamOr26  | EAILSGQILLLYVSTILAVCLGMVVLTLAIEDVYLLLTTFV--AFGYC-----        | 310 |
| AgamOr27  | EEILSGHMLLLYVSTIFSLCLSMVVLSPIDDFILLLTTFV--AFGYC-----         | 310 |
| HvirOr9   | EKIFSKSILFNALTSSVVICVTFGNVLVDNIVMMASFTA---FLLFG-----         | 313 |
| HvirOr7   | EIIYSKSTLNFNLSLSSLVICLTFGNVTIVDDIVIIITFLT---FLSMA-----       | 297 |
| DmelOr85b | NDIFGIPLLLNFMVSSFVICFVGFQMTVGVPPDIVVKLFL---FLVSS-----        | 303 |
| DmelOr85c | NDIFGIPLLLNFMVSTFVICFVGFQMTVGVPPDIMIKLFL---FLFSS-----        | 302 |
| DmelOr85d | NEIFGVSLLSNFVSSSFIICFVGFQMTIGSKIDNLVMLVL---FLFCA-----        | 325 |
| DmelOr67a | NEVFGIPLLLNF IASALLVCLVGVQLTIALSPEYFCKQML---FLISV-----       | 321 |
| DmelOr67c | NDLYSFSLLLNFLMASMQICF IAFQVTEST-VEVIIICYI---FLMTS-----       | 316 |
| DmelOr92a | NNIFSLFLLWNF IASLVCIFAGFQITASN-VEDIGVYFI---FFSAS-----        | 321 |
| DmelOr69a | NDIMNFVFGSSLVGATIAICMSSVSIIMLLD-LASAFKYAS---GLVAF-----       | 308 |
| DmelOr69b | NRSFNFTFLISLSVSMISNCF IAFSMTMFD-FGTSLKHLL---GLLLF-----       | 308 |
| TcasOr6   | EFSDPLFFLNVI GMHPFKADKFSKFR IAFSIAVYFA-----VIFSG-----        | 287 |
| TcasOr11  | SFITQFTTFCF IGS-----LLITWSLQVPDA-----IFYN-----               | 272 |
| AgamOr41  | EAAKNVHSAVEVLSLGLQIVITLFLVQLFSLWIPGLV-----LIPVF-----         | 298 |
| AgamOr42  | ERFYQLQSFVEFLCNSLQVALTLNELHRNFWLPGLF-----ILPIA-----          | 303 |
| AgamOr43  | DKRYLLNNWVQVASSIFNLTGALFGCYVSNSTMYA-----LAITI-----           | 300 |
| AgamOr44  | EKRYLLNNWVQVASSIFNLTGALFGCYVSNSTMYA-----LAI AV-----          | 300 |
| AgamOr66  | QECYRNICVVQVASC SLSTVFNLFALTTD WYATYG-----FIVIS-----         | 304 |
| AgamOr67  | QECYRNICVVQVASC SLSTVFNLFALTTD WYATYG-----FIVIS-----         | 304 |
| AgamOr72  | ENIFGLMCLAQVATATLSICDAMLLVLLTDWYPTYS-----YLYVM-----          | 300 |
| AgamOr73  | ENIFGLMCLAQVSTATLSICDAMLLVLLTDWYPTYS-----YLYVV-----          | 300 |
| AgamOr71  | ENIFGLMCLAQVATEFLSICDAMLLVLLTDWYPTYS-----YLYVM-----          | 300 |
| AgamOr74  | EHIFGLICLTQVATATFSICDAMLLVILTDWYPTYS-----YLYVM-----          | 300 |
| AgamOr70  | EDIFGLMCLAQVSMGVFTICDAMLLVLLTDWYPTYS-----FLLVM-----          | 300 |
| AgamOr69  | EDIFGITCLAQVLMGIFTVCDGMLLVALTFWFPTYC-----FLLVM-----          | 304 |
| TcasOr9   | SDILSIFLMGKVSAAIFNLTLMFAFSLITTGNR---AMIFGLGSYMVST-----       | 210 |
| TcasOr18  | NKILNTFLLIRVSAIVFNLI F IGFNII I ISTD R---TLMLGF CNYFCFG----- | 321 |
| DmelOr83a | ESFYSP IWFVK IGEVTFMLCLVAFVSTKSTAANSFMRMVSLGQYLLLV-----      | 365 |
| DmelOr85e | ENLFSYCYLVKSLQITFQLCLLVFVG--VSGTREVLRIVNQLQYLGLT-----        | 374 |
| TcasOr24  | SKCFSIEM---FTHLTTTGI ICGLENQVQ EHRPE---ALHIGGW-----          | 296 |
| TcasOr25  | SRCFSYVM---FIHLAITGII ICGLENQIVQEHQPE---AMLHMGGW-----        | 296 |
| TcasOr19  | NNCFTNGM---FIHLATTGII ICGLENQVVEGATPG---GVLHLFGW-----        | 261 |
| TcasOr22  | NVCYKHCN---GCYVVMVGII IASLLNQI IKVTAPGLKK-ASELLSIL-----      | 297 |
| TcasOr23  | NVCFKHCN---GCYVVMVGII IASLLNQI LKEKSVG---ALVHFAGW-----       | 294 |
| AmelOr168 | KKLLSPNIGILYLNYVFRFCFLSFMFATTSLSEKLT TYTI-IVSYTTGA-----      | 303 |
| AmelOr170 | KKLISPNI GFLYLSYVFRFCFLSFMFAMT-TAKYFEKCL-LASYTIGA-----       | 310 |
| AmelOr169 | KKLLSPNIGILYIN YVFRFCFLSFM LATS-SGMHFEKCL-LVSYTIGA-----      | 316 |
| DmelOr65b | NDVFHGT LIMQMGVNFSLVSLSVLEAVEARKDP---KVVAQFAVLM LL-----      | 297 |
| DmelOr65c | NKVVFHGT LIMQMGVNFSLVSLSVLEAMEARKDP---KVVAQFAVLM LL-----     | 297 |
| DmelOr65a | NHIFNGAFIMQMLINFLVSLSLFEVLA AKKNP---QVAVEYMI IMLM-----       | 329 |
| TcasOr17  | -----                                                        |     |
| TcasOr21  | -----                                                        |     |
| TcasOr56  | EEDFCYLMLLQF ISSLLIVCFQLFQVSTLSPDS---VEFFSMVCYLLL-----       | 346 |
| TcasOr15  | EEDFCYLMLLQF ISSLLIVCFQLFQLS-----                            | 322 |
| AgamOr9   | LTLFSGPMLSQLYCSVFILCITEFRLLTDVNTM---ADTMQAVMYLVC-----        | 329 |
| AgamOr65  | LDLFSGPLLAQLYCSVFILCITEFRLLTDVNTM---ADTVQAVIYLLC-----        | 332 |
| BmorOr6   | EGTFQVHSHFLGGIVFMICVIGFRMAGESPVS---AQFWAALS YLVI-----        | 302 |
| BmorOr10  | EKTYHANIFFQLSGSVFIICNIGFR IAI VDSNS---LQFYSM LTYLVT-----     | 299 |
| AgamOr34  | QNLFSPAYFVQFSVSGLVICASAYQVASM LNLN-DFSKLMN-VFYMMS-----       | 291 |
| AgamOr37  | EQLFSAAYFAQFGSSGLVICASAFKTS S MFNLY-ELTAIQN-LLYMLS-----      | 303 |

|           |                                                         |     |
|-----------|---------------------------------------------------------|-----|
| Dme1Or94a | QRIVSPYILSQIILSALIIICFSGYRLQHVGIIRD-NPGQFISMLQFVSV----- | 300 |
| Dme1Or94b | EVLVSPYVLSQVVFSAFIICFSAYRLVHMGFQK-RPGLFVTTVQFVAV-----   | 296 |
| Dme1Or71a | EIFISKSTFTQILVSSLIICFTIYSMQMSPVLQ-DLPGFAAMQYLVA-----    | 291 |
| Dme1Or46a | ERLLCKPISVQIFCSVLVLTANFYAIAVLSDER---LELFKYVVTYQAC-----  | 293 |
| Dme1Or46b | ELFIKPGPSVQLMCSVLVLSNLYDMSTMSIANGDAIFMLKTCIYQLV-----    | 296 |
| HvirOr8   | EDVFSITLQVQFMASCIICICLMRFTMP-APLVYYLFLAT---YMFV-----    | 308 |
| BmorOr8   | QSILDVAMFVQFVASAIIICVAMCGLIMVRSSTETLLFMVT---YLFA-----   | 305 |
| AmelOr68  | QEKFKKIIGIQLLSSSTLVVCFILYKLANSTLIST---KFLEFVLYLAC-----  | 287 |
| AmelOr69  | NEQFKMVIQVFTVSTLTICVNLVILMGTQITFE---RIMQLAIYSSC-----    | 282 |
| AmelOr70  | NEKFKVILFLQFCAIAFIACFNLYRMTTITMIP----KLEASLYLIR-----    | 284 |
| AmelOr71  | NDAFQSIMFFQFCTSLSMICFNFYRIMQIEMDS---RYVGTILYMVC-----    | 283 |
| AmelOr72  | NKLFSSILCLQFLISAVAICFSVYRVIIYTKTDS---QFAGAIIFVFS-----   | 284 |
| Dme1Or19a | ERSLSMTCFLOFFSTACAQCTICYFLLFGNVG---IMRFMNMFLLLVI-----   | 296 |
| Dme1Or19b | ERSLSMTCFLOFFSTACAQCTICYFLLFGNVG---IMRFMNMFLLLVI-----   | 296 |
| Dme1Or33a | RSTLHLSQLGQFLSSGINISITLINILFFAEN---NFAMLYYAVFFAA-----   | 291 |
| Dme1Or33b | RSTMNISQLGQFISSGVNISITLVNILFFADN---NFAITYYGVYFLS-----   | 293 |
| Dme1Or22a | RPVFSGTIFVQFLLIGIVLGLSMINLMFFST---FWTGVATCLFMFD-----    | 305 |
| Dme1Or22b | RSVFSGTIFVQFLLIGIVLGLSMINLMFFST---LSTGVAVVLFMFC-----    | 305 |
| Dme1Or42b | KPVIQGTIFVQFLLIGIVLGLFTLINVFFFSD---IWTGIASFVIVIT-----   | 305 |
| Dme1Or59b | RPMISRTIFVQFALIGSVLGLTLVNVFFFSD---FWKGVASLLFVIT-----    | 306 |
| Dme1Or59c | RPILSITIFAQFMLVGLDLGAAISILFFPNT---IWTIMANVSFIVA-----    | 309 |
| Dme1Or98a | RPAVTRTIFVQFLLIGICLGLSMINLFFAD---IWTGLATVAYING-----     | 303 |
| Dme1Or42a | RPVISGTIFVQFLLVGLVGLFTLINIVLFAN---LGSAAIALSFMAA-----    | 308 |
| Dme1Or85a | RPMISATMFIQLLSVGLLLGLAAVSMQFYNT---VMERVVSGVYITIA-----   | 303 |
| Dme1Or43b | QPIISGTIFAQFIICGSILGIIMINMVLFD---QSTRFGIVIVYMA-----     | 308 |
| AgamOr2   | NSLVTHLCLLEFLSFGMMLCALLFLLSISNQLAQMIMIGSYIFMILSQ-----   | 295 |
| AgamOr10  | NDLVTYICLIEFLSFGMLCALLFLLNIIISVMAQIVIVGAYIFMILTQ-----   | 292 |
| Dme1Or30a | NALNTHLHLVEFLCFGAMLCVLLFSLIIAQTIQTVIVIAVMVIFAN-----     | 294 |
| Dme1Or49b | NELTMMFLFELMAFSALLCALLFLLIIVSGTSQLIIVCMYINMILAQ-----    | 292 |
| Dme1Or43a | NKLVANIVAVEAIIFGSIIICSLFLCLNIIITSPQVISIVIMYILTMLYV----- | 292 |
| AgamOr32  | VQLYQSAFYLLLVSTILCCLLGYEFVMVSNYKRMQVAAILASIMIGQ-----    | 295 |
| AgamOr35  | TNLFQYTVFYLLLLDSVLLCVIGYQFVIFMNTPRVLMMLASMAFVMLQ-----   | 305 |
| Dme1Or47a | NQCYQPIICAQFFISSLQCLMLGYLFSITFAQTEGVYASFIATIIIQ-----    | 298 |
| Dme1Or98b | NEYFRPLIC-QFVAASLHLCLVLCYQLSANILQPALLFYAAFTAAVVGQ-----  | 298 |
| Dme1Or9a  | ADKYRPLIFLQFFLSALQICFIFGQVADLFPNPQSLYFIAFVGSLLIA-----   | 310 |
| AgamOr38  | RHAFTPTILIVHICAAFMIICVISMAMFLAEG-INKLTYMPYTFVLMML-----  | 326 |
| AgamOr39  | RSAAFTPNVLLVYTATAIIMCIVCIAMLVVEG-IYKLTYPYFAELTL-----    | 327 |
| Dme1Or24a | SGVMVEITLAHFVTSLLIIGTSVVDILLFSG-LGIIYVYVYTCVAVGVE-----  | 306 |
| Dme1Or45b | SGIMAAPTFFVHFVSASLVIATSVIDILLYSG-YNIIRYVYVYTFVSSA-----  | 315 |
| AmelOr74  | EQVFTFPILSHVVVFSLLMCFDYEILLADIPTLKRLIFLCHMVASFI-----    | 310 |
| AmelOr86  | EHVYTLPIFGHVVVVFSLLMCFDYEIFLANVPVSMRLIFFFHMVGSFI-----   | 309 |
| AmelOr75  | EDIFTVMVLGQVMFLAVVICLVGFQFLADTSASKKASLVNLGGTFF-----     | 309 |
| AmelOr84  | ENIFTIIVLGQVLFALALVICLVGFQFLMDTPASRKVSLTLNFACTL-----    | 306 |
| AmelOr87  | NDIFTIIVLGHILVFSLLMCLVGFQVLMANSPPTRRILFVPHITGSLC-----   | 334 |
| AmelOr76  | EQVFNSIVFGQVLLFSLMCLDGYLILMEETPFGRRTVTFPHITGCMC-----    | 312 |
| AmelOr85  | EMVSNFIIIFGQVLLFSLMCLDGYLILMEDTSNMSRLIFTFHLISCMC-----   | 317 |
| AmelOr88  | EDVFSIIVLQVLLFSLMCLDGYLILMEDTSRAKRVIFTFHLMGCMC-----     | 315 |
| AmelOr91  | EVVFNWIVLEQVLMFSLMCLDGYQILMANGDIKRLTFSFHILACL-----      | 316 |
| AmelOr92  | EVVFNWIVLEQVLMFSLMCLDGYQILMADEDIKTRISFISFHILSCL-----    | 313 |
| AmelOr95  | EEVFNLIVLEQVLMFSLMCLDGYQLMADTSTTRRLIFLGHITVCLC-----     | 312 |
| AmelOr93  | EEVFNLIVLEQVLMFSLMCLDGYQILMADGDVKTRLIFSFHILGFLC-----    | 300 |
| AmelOr77  | EKVFSLIILCQVLTFSLIICLDGYQIIL-----                       | 295 |
| AmelOr94  | EEIFTIITLGQVLIFFSTLICFVGYQVLLVNMTLSWRISFLCFLITNMC-----  | 311 |
| AmelOr96  | EEIFTIIVIGQILMFSILFCFLGYQVILADLTPSYRISFISYLFAGMC-----   | 311 |
| AmelOr79  | ENVYTIITLGQVLFVSVLILCLFGYQVVFVATASFARRSIFVFMNLGSMF----- | 311 |
| AmelOr83  | ENVYTIITLGQVLFVSVLILCLFGYQVVFVAAASTARRFIFVFLLSGSMF----- | 316 |
| AmelOr80  | ENVYTMITFGQVLFVSVLILCLFGYQVVLVATISFARRFIFVFMNLGSMF----- | 314 |
| AmelOr81  | ENVYTTITLEQVLFVSVLILCLFGYQVVLVATASFARRFIFVFLNLGSI-----  | 311 |
| AmelOr82  | ENVYTRIAFGEMLVYSILICLFGYQVVLVATASFARRSIFVFLNLGSTF-----  | 313 |
| AmelOr78  | ENVYTTIMLSQVLLFVSVLILCLFGYQVLLATASLARRSIFIFLLMGAMF----- | 313 |
| AmelOr89  | ENVSPTIILEPVMVFSVILCLFGYRILWANAPSTRRSIFIFLLIGAMS-----   | 310 |
| AmelOr90  | ENVYTMIIILGQVIVFSALICLFCYQVLLANAPSARRSIFIFLLIGAMS-----  | 311 |
| AmelOr142 | RQSIKFLILATNGTTVIAVIFGSLNLIANQ-PLILKALYAIIVVFSASV-----  | 286 |
| AmelOr146 | VNSARYTTLITLTCICGVESVFGGIIFIGRQ-PFTVKLQFLTLSATLL-----   | 286 |
| AmelOr148 | VSCIRFLVFYAIAVGTFLMFLSGIIMIINS-PILVKIQFIIICMSSLM-----   | 283 |
| AmelOr158 | VSSIRFLVFYAITISTFTLTLSGIIMIINC-PLFVKMEFITISISLLV-----   | 284 |
| AmelOr147 | VNCIRFIIFYTMAVSTIVLTLSGIILITTS-SLLVKIQFLTICISILL-----   | 284 |
| AmelOr150 | VIGFRFIILCAIGISTFALTLLGGVIMIKKA-PFIVKVQFITLILTLT-----   | 286 |
| AmelOr151 | VISFRFIILYAIIVSTFVLILDGIIMIMKV-SLIVKVQFITLSLTLT-----    | 286 |
| AmelOr152 | VISFRFIILCAMGVSIFSLTLGGIIMITKS-PFIVKVQFITLILTLT-----    | 286 |



|           |                                                          |     |
|-----------|----------------------------------------------------------|-----|
| AmelOr154 | INCFRYIVLYGIAVTTTFALILLCGIILLMNI-PLIVKIQFVIIICITIMT----- | 286 |
| AmelOr155 | IKCFRYIVLYYITITTFALIISCIILLMNV-PLIVKMQFIIICVTIMT-----    | 286 |
| AmelOr157 | VSCIRFLVFHAILLGTFLVTLFCGIVLIINS-PLIVKAQFIIICVCILL-----   | 283 |
| AmelOr156 | ANCFRHIIIFYTIIATSFNMILAGIILLMNP-LLVIKIQFMITCFITALI-----  | 286 |
| AmelOr153 | INWFRFIIFNAIGLSILVFTLASIILIMIS-ICMYIVVCSMNFINK-----      | 262 |
| AmelOr144 | NATVETLLFKTNVTMGSTVICGAFPLLNQ-SLDVVTQFLPLVLSGML-----     | 287 |
| AmelOr145 | NATVETLIFKTNITMGSIVICGAFPLLNQ-SLDVVTQFLPLILTGML-----     | 288 |
| AmelOr143 | KATVETLLFKTNVTMGSTVMCGAFPLLNQ-SLAAISQFLPLVLSGIL-----     | 282 |
| AmelOr1   | GESLSIVFLSEMLGCTIIICFLFEGVIMELEDHKTLSVTYFVLMTSI-----     | 314 |
| AmelOr3   | GKLSLSIVFLSEMLGCTIIICFLFEGVIVEWEDHKTFSMVTYFVLVTSM-----   | 317 |
| AmelOr6   | ELITQYFCFYEISCNTCLICFIGYCIILEWENSNNVAIVVHFMLLGTC-----    | 309 |
| AmelOr7   | ELITQYFCFYEISCNTCLICFIGYCIILEWENRNVAIVVHFMLLGTC-----     | 309 |
| AmelOr4   | ELITQYFCFYDIGCSTCLICFIGYSIIVEWENHNIASSTVIYFSGLVTC-----   | 311 |
| AmelOr5   | ELITEYFCFYDIGCNMCLMCFIGYSAILWENHNIAAIVVHFMLLGTC-----     | 311 |
| AmelOr8   | DQFVPPYVYLIEIFVGVLTICILGYCIIVEWEDSDAMAIAYVALQTTTC-----   | 311 |
| AmelOr9   | DQFVPPYVYFIEMIVGVLTICVLYGYCIIVEWEDSDAMAIAYVVLQVTC-----   | 311 |
| AmelOr11  | DQFVPAIYLVIEVVIQVLIICIIGYCIIMEWEDSNAMAMVIYVVFQVTC-----   | 309 |
| AmelOr12  | NQFVPSVYFFEIILEVLIICIIGYCLITWEDNNTMATVIFVIFQITC-----     | 311 |
| AmelOr10  | DQFVPTIYLFVFIQVLIIMCIIGYCIIMEWKESNGMGLITYVIVQMTTC-----   | 310 |
| AmelOr14  | EQLTTYLFLEIMVETSIGCVIYGNVVTWEDSNAAAMI IHLMMQVST-----     | 313 |
| AmelOr15  | EHITTYLFLEIIDETGIGCVIYGYCAITWEDSDATAAIYLLLEASV-----      | 314 |
| AmelOr13  | EQLTSYLYFCEILEYVCGACVIGYCLITWENSNAALIVYFILEFLC-----      | 305 |
| AmelOr16  | ETVTEYICLIEMIGGTCLMCLVGYCILMELENTNTMAVVVYITLQISI-----    | 316 |
| AmelOr17  | ETITEYICLIEMIGSTCMICLVGYCILEWENNTNTMAIVIYITIQISI-----    | 316 |
| AmelOr18  | EDLLHEISLIEVVGCTLNICFLGYYSMMEWDSKQPVSGVTYIILLISV-----    | 325 |
| AmelOr19  | EDLLREISLVEVVGCTINICFLGYYSMMEWDEHLIRGMTYIILLTSV-----     | 325 |
| AmelOr22  | EKALQQVSFVEFLGCMLNICLLGYVIVITEWSSSHLTSAITFFILLISL-----   | 326 |
| AmelOr24  | EKALQQVSFVEFLGCMLDICLLGYVIVIMEWSSSHLTSAITFFILLISL-----   | 318 |
| AmelOr20  | EKTLQQISFTEFLGCTLDICLVGYVIVIMESKSNVTSVITYIILLISL-----    | 322 |
| AmelOr25  | EKALQQISFVEFLGCTANMCLLGYYLIVWNPKEIILSVTYVALIISI-----     | 317 |
| AmelOr29  | ERALQQISFVEFLGCTANMCLLGYYLIVWNPKEIILSVTYIAI IASI-----    | 318 |
| AmelOr30  | ERALQQISFVEFLGCTMNMCLLGYYLIVWNPKEIILSVTYISLLISF-----     | 318 |
| AmelOr21  | EKILQQVSYMEFLECTVNVCLLGYCAIIEWESNHLTEVVTYVILITIT-----    | 318 |
| AmelOr23  | EKILQQVSYMEFLECTMNVCLLGYCAIIEWESNHLTEVITYLILLITIT-----   | 318 |
| AmelOr35  | EELLNEICFVEFIGTCLNICFLGYFLLKEWEQSETIGILTYCILLISF-----    | 327 |
| AmelOr27  | ENIMNRIYFLELFRCTMIICIVGYILTEWAEKNVQNLTTYFMMLLSI-----     | 320 |
| AmelOr28  | EETINRIIFLEVFRCLHICCLGYILMEWSDYDKRSMIYFMLFVSV-----       | 320 |
| AmelOr33  | ENVMSGICFMELFKCTMNICMLGYVVLTAWIDNMRNLIVCSVILFSM-----     | 322 |
| AmelOr34  | ENVMSGICFMELFKCTVNICMLGYVILTAWTGHDIQSLIVFSVILFSM-----    | 322 |
| AmelOr32  | ENVMSGICFMELFKCTVNICMLGYVILTAWSVHDIQNMVFLVILLSM-----     | 322 |
| AmelOr31  | EDVLRNRCFMELFKSTLDISMLGYVILTEWADHDIRNLTTYFMILTSM-----    | 321 |
| AmelOr36  | EHLSPICFMEMFKNILSICLFSYCILAWESEHNIRILSTYILAVINI-----     | 318 |
| AmelOr37  | EHLSPICFMEMFKNILSICLFSYCILAWESEHNIRILGTYIFAVINI-----     | 319 |
| AmelOr38  | EHLSPICFMEMFKNILSICLFSYCILAWESEHNIRILGTYIITVINI-----     | 320 |
| AmelOr39  | EHLSPICFMEMFKNILSICMFSYCILAWESEHDIRILTTYTFVMMNL-----     | 320 |
| AmelOr47  | EHLSPICFMEMFKNILSICMFSYCILAWESEHDVRLGIYAFAVICI-----      | 319 |
| AmelOr48  | EHLSPICFMEMFKNILSICMFSYCILAWESESRDIRVLGIYTFVMMNV-----    | 319 |
| AmelOr40  | EHLSPICFMEMFKNVLSICMLSYCVLVEWVSGRDIRALSAYTFVSMNI-----    | 319 |
| AmelOr43  | EHLSPICFMEMFKNILSICMLSYCVLVEWVSGRDIRALSAYTFVSMNI-----    | 320 |
| AmelOr45  | EHLSPICFMEMFKNILTICMLSYCVLVEWVSGHDIRALSAYASAVMNI-----    | 319 |
| AmelOr41  | EHLNPIYFMEMFKNILTTCMLSYCVLVEWVSGHDIKVLSAYSFTITNI-----    | 319 |
| AmelOr42  | EHLNPIYFMEMFKNILTTCMLSYCVLVEWVSGHDIKVLSAYSFTITNI-----    | 319 |
| AmelOr44  | EHLSPICFMEMFKNILSICMISYCVLVEWVSGRDIRALSAYTFVSMNI-----    | 319 |
| AmelOr46  | EHLNPIYFMEMFKNVLSICMFSYCVLVEWVSGHDIRALSAYASAVMNI-----    | 318 |
| AmelOr49  | EHVMSPICFMEMIKCMVVICMPIYIILMEWSEHNIQNLTVYVMI IISM-----   | 319 |
| AmelOr50  | ERITCPIYFMELFKCMMGMCPSYFLAWESEHNIQNLTIYVMVALSM-----      | 321 |
| AmelOr26  | EKVMNICLVELVGCTMNMCLKYYFLTEKSK---TILGIYAIYVYASM-----     | 324 |
| AmelOr53  | EEALREICFTEIEICTIDMCMLEYCYIMEWVSGDTITLLTFFTLTLLISF-----  | 325 |
| AmelOr54  | EEALKEICFTEIEICTLNMCMLEYCYIIEWESAGDTITFLTFFTLTLLTSF----- | 323 |
| AmelOr52  | EEALREICLAEIIECTIIMCCLLEYCYIMEWVSGHDIRALSAYASAVMNI-----  | 320 |
| AmelOr51  | ETTLRELFLVEVIVSTLLMCLLEYCYIMEWVSGHDIRALSAYASAVMNI-----   | 322 |
| AmelOr55  | EKVLQEVVFFLEFISSTFVICLLEYCYITDWEQNNIISLTSYALLLISL-----   | 321 |
| AmelOr57  | ETVLQEVVFFLEFVSSTFVICLLEYCYITDWEQNNIISLTSYALLLISL-----   | 321 |
| AmelOr56  | ETILQEVVFFLEFVIGSTFVICLLEYCYIADWEQNNIISLTSYVLLLISL-----  | 321 |
| AmelOr58  | ETVLQEVVFFLEFVIGSTFVICLLEYCYITDWEQNNIISLTSYVLLLISL-----  | 323 |
| AmelOr59  | QEVQLQELCFLEICIGSTFLICLLEYCYITDWEQNNIISLTSYVLLLISL-----  | 324 |
| AmelOr60  | QVILQEVVFFLEFVIGSTFVICLLEYCYITDWEQNNIISLTSYVLLLISL-----  | 324 |
| AmelOr61  | EMALQELCFLEICIGSTFLICLLEYCYITDWEQNNIISLTSYVLLLISL-----   | 324 |
| AmelOr63  | NKTISSILIVQLSSSCMLICTTGFEFILALSIGNIVMIVKTFVAVICVL-----   | 310 |
| AmelOr64  | NETISSILIVQLFSSCVLICCTTGFEFILALNIGNIVMTIKTFIVMVCVL-----  | 306 |

|           |                                                          |     |
|-----------|----------------------------------------------------------|-----|
| AmelOr66  | NETISSILVIQLFSSCVLICCTGFEFILALSIGNIVMMIRICIAMCVL-----    | 306 |
| AmelOr65  | NETISSILIIQLFSSCVLICCTGQFQILALSIGNIVLTIKILIMCVL-----     | 306 |
| AmelOr67  | NETVSSILVIQLFSSCVLICCTGCFQALITLTFGNVLTIKILAEISIL-----    | 306 |
| AmelOr114 | ENCFNVMLLIQILGCTVQLCTGCFQAIMSFGGGEAQEYLFQMLFLLVYVF-----  | 283 |
| AmelOr115 | EDCFNITLLVQTLICTAMFCLTGYRMITSVREDEADVPVIGLIFFFIHVI-----  | 306 |
| AmelOr118 | ETIFTYISLQCQFVSNMLVICFISFVLTVSLHTEQTIIVLIMKCLPYIA-----   | 285 |
| AmelOr164 | ENIFTFISLSQFFFNILVICFVNFILVTSIGTEQAPTVISKCFPYIA-----     | 297 |
| AmelOr163 | KYLFLYTSLIQFLSNILVICFLGFLVNALGTEQESTIFIKCFPYIA-----      | 299 |
| AmelOr165 | EKLFTYIALSQLVSNLITCCVGLFIVIAIHEDNGLPLLLKSVLFYMV-----     | 289 |
| AmelOr166 | EKFFTYIALSQLISNLTITCCLGYLIVITLHLGNNI-ILIKYIMFYVA-----    | 288 |
| AmelOr167 | ESLFSYIALMQLICNTLIICCIIGFLIVVALN--SNLKLIRISFFYIA-----    | 299 |
| DmelOr35a | EAQYTVRVFIMFAFAAGLLCALSFKAYTNP MANYIYAIWFGAKTVELL-----   | 314 |
| DmelOr74a | EKEFTLRIFVMFAFSAGLLCALFFKAFTNPWGNVAYIVWFLAKFMELL-----    | 315 |
| AgamOr3   | ETTFRWVFFVQFIQCTMIWCSLILYIAVVG---FSSTVANVCVQIIL-----     | 322 |
| AgamOr5   | EIIFRWVFLGQFIQCVMIWCSLVLYVAVTG---LSTKANVGVLFIL-----      | 303 |
| AgamOr13  | ESITSLVLLQQLVLCVMIWSSMLLYFTVSG---FDLNFINLLVLFVAF-----    | 302 |
| AgamOr15  | ESITSLALLQQLLLCVLIWSSMLLYFTVSG---FNVNFMNLFVLFVF-----     | 301 |
| AgamOr17  | ESITSLVLLQLILCVLIWSSMLLYFTVSG---FDLNFISLILFVVF-----      | 301 |
| AgamOr16  | HDITAPIMLLQVLVLCIMVWSSMLLYFTVAG---FNTQFISLILVMF-----     | 299 |
| AgamOr55  | ETIVSPIMLMQIVLCVLMSSSMVLYFTFPT---MSGHMINVLLFLV-----      | 302 |
| AgamOr18  | ELVLQPLLLMQFVLCILIWCMMLLYFTVSG---LNVKFINMFLFLF-----      | 309 |
| AgamOr14  | VQALRPILMVQLVFCVFIWCLMMLFFTTIADK---FSVAFFNLAILFVV-----   | 323 |
| AgamOr51  | VKALRPVLLQLVFCVLIWCLMMLYFTITDG---LSVKFFNIGIMFLV-----     | 311 |
| AgamOr12  | NQTL SYVFALQLVLCMLTWCFTLLYVLVVR---LDVTSMMSSLIMIN-----    | 312 |
| AgamOr19  | NQTL SYVFALQLVLCMLTWCFTLLYVLVVR---LDVTSMMSSLIMIN-----    | 312 |
| AgamOr20  | NQTL SFVMTVQLALCILTWCFTLLYILTVG---LDVTGMNGLLIMFN-----    | 312 |
| AgamOr21  | NQTL SFVMALQLALCILTWCFTLLYILIVG---FNAIATNGLLIMIN-----    | 309 |
| AgamOr50  | NQTL SYVMALQALGTLTWCFTLLYILIIIG---LDVTAMMGLLIMN-----     | 311 |
| AgamOr29  | QEALNLSLLFQLTFCSLIWCLMMFYILLMG---FDSRILNVLILLLI-----     | 300 |
| AgamOr53  | EQALNLSVLFQFASCSAIWCLMLFYILLMG---LDSRVLVSVLLLVI-----     | 290 |
| AgamOr30  | QNALNPALLIQTIFCTAIWCLMLFYILLG---FTSKVMNVCLLLLV-----      | 301 |
| AgamOr46  | QNILMEILLAQFTGCVFIWCFMLYYVMISG---ITAEGIAVGAMLIA-----     | 301 |
| AgamOr47  | QNILMEILLAQFTGCVFIWCFMLYYVMISG---ITAEGIAVVAMLIA-----     | 301 |
| AgamOr48  | DSILSLILLIQCVGCLLMLCLMLFYITRN---HSLNVINIAVLLMS-----      | 311 |
| AgamOr49  | DSVLNLMMLLVQFTNTVLMCCFLFYISKN---FNSGAVNVLLFLA-----       | 318 |
| AgamOr61  | SSIVGPFVSVQYYGTALADIADCGF-ILSIEG---LSANGMIYLLFVTV-----   | 321 |
| AgamOr62  | RSIVAPFAFLQYYSTFGLIADSFV-VVSFEG---FTGYSMAYVLFASF-----    | 319 |
| AgamOr63  | KAVIGPIAFVQYYSTYLIADCCCL-ILVSHG---LSSFSIVYFISMLV-----    | 314 |
| AgamOr60  | GSILKPPFSFIQYYGSFTLIGYYCF-ILMYKG---VTPLTVVYIAFIVF-----   | 316 |
| AgamOr75  | RTL LRNYSLVHFSFYMIIVATFMTRVLIIPG---RSSFGLAIPLLVTT-----   | 320 |
| AgamOr76  | RTL LRNYSLVHFFFYMIIVATFMTRVLIIPG---RSSFGLAIPLLTTT-----   | 320 |
| AgamOr78  | RTL LRNYSLVHFFFYMIIVATFMTRVLIIPG---RSSFGLAHPVDDDD-----   | 321 |
| AgamOr77  | KRHMNGSVLLELLFIVCLLALNGLRLCTTTT---TSDLSELALSSSMIL-----   | 299 |
| AgamOr79  | KRHMNGSVLLELLFIVCLLALNGLRLCTTTT---TSDLSELALSSSMIL-----   | 297 |
| AmelOr99  | NENCQYSYLIQVGLNMLGMSTTAVQTVINLD-RPDVAIRSAVFFGADQ-----    | 320 |
| AmelOr101 | NENCQYSYLIQVGLNMLGMSTTAVQTVINLD-RPDVAIRSAVFFGANQ-----    | 320 |
| AmelOr102 | NESNRNSYLIQVGLNMLAISATAVQAVVNLDRPEEAIRSAVFCGANQ-----     | 319 |
| AmelOr103 | NESNRNSYLIQVGLNMLAISATAVQAVVNLDRPEEAIRSAVFCGANQ-----     | 319 |
| AmelOr104 | NESNRNSYLIQVGLNMMGISVTAVQTVINLD-RPEEAIRTAVFLGAEQ-----    | 320 |
| AmelOr98  | NNSSQLSYLQIGINIMGISTTAFQVLVNLDRPQEAIRNAVFCGANQ-----      | 317 |
| AmelOr100 | DESSRNTYLFVGTNIMATSISAVQVVLNLD-KLEVAIKSAVFLIAAQ-----     | 240 |
| AmelOr97  | NKSSRNSYFLQISLTIIGISIIAVQIVMYLH-KPEEAFRISLFLIAAQ-----    | 264 |
| AmelOr105 | EKCCRNLYLIQMGLNIMIISVTCVEVVVFLDRPKEAIRAIIYVIAQQ-----     | 320 |
| AmelOr109 | DACHIHYFLLVIGMIVLAFTGTFLKLSMTEV--GIRFFTFCAYTIAQL-----    | 308 |
| AmelOr110 | DACHIHYFLLTIGMIVLFTGTFTVVKLSTMEM--GIRFFTFCAYTIAAQL-----  | 307 |
| AmelOr111 | DACHIHYFLLIIGMIVLAFTGTFTVVKLSSMEV--NVRFFTFCAFVTVGQL----- | 308 |
| AmelOr108 | DACHIHYFLLIIGMIVLAFTGTFLKLSMTEI--EIRFFTFCGYTVAGL-----    | 308 |
| AmelOr107 | DACHIHYFFILLGMIIVTFTGTFTIKLTSMEI--GGRFFTFCTFTIGQL-----   | 308 |
| AmelOr112 | ENSYHTYLFVSMGLLIMAISVSLELVANGKN--GSRELVQATFLFAQL-----    | 305 |
| AmelOr113 | EDTHVNLLFISLGLIIMCFSTLLKVVVTMDY--CLDFYKYSSFLIVQL-----    | 306 |
| AmelOr106 | EDFYSMNIFAQVGASILCLTVTLMKIATIKW--SMETNQYGFVIAQV-----     | 304 |
| AmelOr122 | IDLKIKDIHRVVDIHCHAIELLYKALITMDN--RIEIFGSTLIVIYHL-----    | 279 |
| AmelOr125 | IDLKIKDIHRVVDIHCHAIELLYKALITMDN--RMEILGSTLIVIYHL-----    | 278 |
| AmelOr123 | TDLKLRDIHRVVDIHCHAIELLYKALVTTDN--RMEILGSTLIVIYHV-----    | 276 |
| AmelOr126 | TDLKLRDIHRVVDIHCHAIELLYKALITMDN--RMEILGSILIVIYHL-----    | 276 |
| AmelOr127 | IDLKLRDIHRVVDIHCHAIELLYNALITMDN--RVEIFCSTIVVYIYHL-----   | 276 |
| AmelOr128 | TDLKFRDIHRVVDIHCHAIELLYKALITMDN--RMEIFGCILVVAYHL-----    | 276 |
| AmelOr129 | TDLKLRDIHRVVDIHCRTELLYNALIIIMNN--RMEIFGSALMVMYHL-----    | 276 |
| AmelOr133 | IESKLAELYCVVDIHNQAIQLLVNAITIKKD--QLEILISLIIFVNHL-----    | 181 |
| AmelOr134 | IDSKLAELYRVVDIHNQAIQLLVNAITIKKD--QLEILISLIIFTNQL-----    | 277 |

|           |                                                          |     |
|-----------|----------------------------------------------------------|-----|
| AmelOr131 | IDSKLAELHRVVDIHNQAIGLVNVNAITIKKD--QLEILITLIIFANHL-----   | 279 |
| AmelOr132 | IDSKLAELYHVVDIHNQAIQLLENAIIVTKD--HLEILICLMLFVKQL-----    | 279 |
| AmelOr135 | IETKLAELYRVVDMHNQAIPELLVNAIIKKD--QLEISISFIFVFNQL-----    | 277 |
| AmelOr136 | IDSKLAELYRVDIHNQAIPELLNAIVIKKD--ELEILISFIFFTTQL-----     | 279 |
| AmelOr138 | IDMKLTELYRAVDIHNQAIGLLVNAIIVKKD--QLEMLISFMILMAQL-----    | 185 |
| AmelOr130 | IDSKLIELYRVVDIHNQTIPELLVNATLIKKN--QLEMLFCFTLVVAIHL-----  | 279 |
| AmelOr137 | IDTKLTELYRAVDIHNQTIIGL-----                              | 253 |
| AmelOr139 | INSKLVELYHVVDIHNQVIELLVNMILIRKD--QLEIFMFFIFLVSQM-----    | 201 |
| BmorOr20  | SEAFGPMLFVYYLFHQVSGCLLLECSQLNNTAALVRYGVLTVVLYQQL-----    | 357 |
| BmorOr3   | SEAFGPMLFVYYLFHQVSGCLLLECSQLNNTAALVRYGVLTVVLYQQL-----    | 357 |
| BmorOr18  | SEAFGPMLFVYYLFHQVSGCLLLECSQLNNTAALVRYGVLTVVLYQQL-----    | 357 |
| HvirOr6   | SDVFGPMLFIYYAFHQASGCLLLECSQMTARALMRYLPLTIIMLQQL-----     | 347 |
| BmorOr23  | SETYGLAVLIYYAFQOVVGCCLLQLCSQMEKLTVTRFGFLTIVLNQQL-----    | 334 |
| BmorOr16  | SETYGLAVLIYYAFQOVVGCCLLQLCSQMEKLTVTRFGFLTIVLNQQL-----    | 334 |
| BmorOr4   | SETYGLAVLIYYAFQOVVGCCLLQLCSQMEKLTVTRFGFLTIVLNQQL-----    | 333 |
| BmorOr5   | SETYGLAVLIYYAFQOVVGCCLLQLCSRLDLKTI TRFGFLTIVLNQQL-----   | 334 |
| BmorOr22  | SNVYDVVIIVYYLFHQVSGCLLLECSQLNNTDWESELSRYGPLTLIIFQQL----- | 341 |
| BmorOr17  | SNVYDVVIIVYYLFHQVSGCLLLECSQLNNTDWESELSRYGPLTLIIFQQL----- | 341 |
| BmorOr1   | SETFGVILLVYYGFHQVSLCMLLECSDLSTKAMLRYGPLTLIMIQQQL-----    | 348 |
| BmorOr1a  | SETFGVILLVYYGFHQVSLCMLLECSDLSTKAMLRYGPLTLIMIQQQL-----    | 348 |
| BmorOr1b  | SETFGVILLVYYGFHQVSLCMLLECSDLSTKAMLRYGPLTLIMIQQQL-----    | 348 |
| BmorOr19  | QSAFGLNVASNYLQNLIEDGLFLYQIMNGEKENVLMYGLMIILYLGGL-----    | 326 |
| BmorOr15  | QSAFGLNVASNYLQNLIEDGLFLYQIMNGEKENVLMYGLMIILYLGGL-----    | 326 |
| TcasOr5   | NETFGELMLLRFSG----DFIYLVIVGLSS-----                      | 246 |
| TcasOr7   | SSFIVVLWLLFVHVSIVTISFVFGKVKEQHQ-----                     | 259 |
| HvirOr4   | DDSYGLPLVILISTLLHLIVTPYFLIMEIIVST----NRIHFLVLQFLW-----   | 302 |
| BmorOr13  | DNNNGIIVLLLLASFLHLVTPPYLIISFVTESPHTGFVKVLPILQTVW-----    | 349 |
| DmelOr10a | RDRYTIITLAHFVSAAMVIGFSMVNLLTLGNNGLGAMLYVAYTVAALS-----    | 324 |
| DmelOr33c | SRTISEVQLVQLGGCGATLCIIVSYMLFVFGDTISLVYYLVFFGVVVCV-----   | 297 |
| DmelOr7a  | SPVISRTIFVQFLITAAIMGTMINIFIFANTNTKIASIIYLLAVTLQ-----     | 322 |
| DmelOr22c | TRQFTVIVLMHFLSAAFVLCSTILDIMLNTSSLGLTYICYIIAALTQ-----     | 321 |
| AgamOr1   | QDIFQGSIFAQVCASVIIICMTLLQATGDDVTMADLLGCGFYLLVMTS-----    | 330 |
| AgamOr4   | NTSIRSMLMLQWLTVCVLNWSISLIYLTNVGISLSQSVTVVVMFFLATAE-----  | 309 |
| DmelOr47b | NRAFNGAFNAQLMASFSLISISTFETMAAAAVDPKMAAKFVLLMLVAF-----    | 327 |
| AmelOr73  | NTVFPQYMIFFLQFTISSVVLCLSIYKFSTVDPPLSMNFVWSGFYLCCLM-----  | 280 |
| AgamOr68  | SDLWSMINLAQVGC SVFGICINMLIIFLTDWYAAAYAILFALFIDLSVH-----  | 311 |
| DmelOr59a | EAFISLPLMIQFTVTALNVCIGLAALVFFVSEPMARMYFIFYSLAMPL-----    | 295 |
| DmelOr23a | KSLVSYPMVQFMVIGINIAITLFLVIFIVETLYDRIYYLCLFLGIV-----      | 292 |
| AgamOr31  | INAYKNVILNQLLISSVLLCMLGFQLVIVSGTINIMVVYVAYGMAITIQ-----   | 290 |
| DmelOr2a  | QRVLSVPCMAQFVCSAAVQCTVAMHFLYVADDHHTAMIISIVFFSAVT-----    | 313 |
| AmelOr62  | EQTFNMIIFVQQLMSALLICVGEFVFLVCLSTKDNIGALKSMVLMVTL-----    | 312 |
| AmelOr121 | KMFVEQIINLIITIFKYFFKCLKMYIEEEQFSLFRIIYLICNFTNTFL-----    | 310 |
| AmelOr140 | ESLFTKSILVQLFFNVLCLSITGVETVIKLGNLSEMMRFGSFTFAQAV-----    | 276 |
| TcasOr12  | TNLFTTCTITAQFVVGVIIVCMFMFQMSVLSVLSFQFAAMLLYQICVLM-----   | 306 |
| AgamOr8   | EHMFSPLLNVNLFSSSVIICLVGFQATAGITPADLKFVFLVLSPLVQ-----     | 309 |
| BmorOr9   | ENIFTAPNLFNVLIGSVEICALGFNLMIIGDLTQIPGCILFLSSVLLQI-----   | 296 |
| AgamOr40  | ENCYHPYVLLKLLQILLLCLFSLFMATVESLSTMKLINVLEYFMLSIT-----    | 371 |
| TcasOr63  | EAFISKGIFFLQFGSVIVICTTGFQILVVPISVQFAVLGTYLTCGTT-----     | 297 |
| TcasOr4   | FELWQIKPKIDSCKFIKFRILCILVFLVYTLVPLVDDKEDLSLPLG-----      | 293 |
| TcasOr13  | NDSFGLLILVLSGCLVHLLATPYALYAIIFTGNTMFIITQSIWMTG-----      | 318 |
| AgamOr24  | VDFLNPYHFVTLISTVPTMVISVGLVLLDWPYGAIVFLG-----             | 289 |
| AgamOr54  | CSLFELHFFIVFGCIEFFQLVSNVVIVSVP----DWYPGYFLFIMLT-----     | 280 |
| AgamOr23  | DKLLKKQFFINFGCMIFELVASLAIIVRVPWPYPGMAICLICITNQLFIN-----  | 303 |
| AgamOr64  | CKVFSPI SVVLYYGALITITCTCFYVMKHDVSTTTVCYAGFAVYMLFN-----   | 324 |
| DmelOr82a | RSIYTPVMGQFVITSLQVGVIIYQLVTNMDSVMDLLLYASFFGSIML-----     | 302 |
| AmelOr116 | QDIFGIIFFQQLFVNCIIVCLAANLSQIKNYITPEFFGSLLYICMIY-----     | 315 |
| AmelOr160 | ANTFSSLMFVQTLGLIFSLCIVVYQLLMTSESGEDMNTIHFIIYSCAV-----    | 305 |
| TcasOr10  | SEISDEIFHSDWSDQVYKNKTARLIVMNRARPAKISIGKFLDLNLR-----      | 272 |
| TcasOr26  | NDTYRYSFVSVIVLCAGTLFGCIGYTVMKFHS-----                    | 273 |
| AmelOr117 | NNLFTPIIFIQLLTSGIEICLSGYAVLDNNSANADLLKFI SYFISMG I-----  | 315 |
| AmelOr120 | EKNFHLILFLQAITSSLIICFVGFQISIALTERSKFLESFSLHIVSLF-----    | 317 |
| BmorOr7   | QSIFSSAILIQFGIGAWILCMAAYKIVNLSVLSIEFASMILFISCILT-----    | 307 |
| AgamOr6   | LDAGVNVWRNGYMLVKVFLFMLCFLIELLMLCAYGEDIVESVRHQAVMS-----   | 319 |
| DmelOr45a | SSIFGEIVFVKYMLSYLQCLMAFRFRSRSWSAQVPPFRATFLVAIIIQ-----    | 295 |
| DmelOr67d | KKIYSIVLQVQLSTTCVGLLCTISCFMKAWP----AAPLYLLYAAIT-----     | 307 |
| DmelOr83c | TDYCRAINALYYELIATQVLSMALAMMLSFICINLSSFHMPSAIFFVVS-----   | 312 |
| AmelOr162 | EDTNTTSYLLQLGFNMICISFTQFQAIINIEDTPKVLRYVSTIALLC-----     | 285 |
| HvirOr3   | ESIFKEYFLVQNLAVTVELCLNAVMTVVGVHQITLLVSVFVAYLLLALVN-----  | 186 |
| TcasOr20  | DLAFNQMMLLHITWTGFIISVLGFEISTDDYVEAFRFFMHLLGWLGM-----     | 303 |
| AgamOr11  | EQLTRAAVFLDFVVFVSVLLCALLFEASMTPSGVQVVIDVCYITMTMTI-----   | 341 |

|           |                                                              |     |
|-----------|--------------------------------------------------------------|-----|
| DmelOr56a | QYLICVPMADFIIFSVLICFLFFALTVGVP SKMDYFFMFIYLFVMAG-----        | 335 |
| AgamOr28  | EDGFSFFLMAQFLTSSILV CVVLYELTMVFGWNEDTFKTVTYLPGAIL-----       | 335 |
| AgamOr58  | RNNLKLYLLNLVADFSLITFAGCQMVISSEGDQHLYSILAALTAACLN-----        | 303 |
| AgamOr59  | QRMASFVFLQHIFSLGLVAGSVYTLRGPALRENIVLSEYPI SVVLEY-----        | 324 |
| DmelOr1a  | NYSFMEIAFVEVVIICGLYCSVICQYIMPHTNQNF AFLGFFSLVVTQ-----        | 304 |
| DmelOr13a | EDFFNPILLANLMISSVLICMVG FQIVTGKNMFIGDYVKFIIYISSALS-----      | 316 |
| AmelOr161 | ERIINLLALGQFVISTGLICFAGFQITSMMEDKGRMLKYSTFLNSAIL-----        | 302 |
| AmelOr141 | EHLTSGMFFIQVIAS TYNISLVGFKLLEDTPDKFKYITQLIILIIQLF-----       | 349 |
| AgamOr52  | NRVHSFSITVQYYTALLSLAIDAFFISY YGLNFVSVCVSIFSVLLVFE-----       | 291 |
| AgamOr36  | KPFLQTTFLVMFYSAALFLAIGTFMISANGTTTYGVILSGFLFALLE-----         | 312 |
| AgamOr25  | EQTYYIDLVDLDFGLVCLILCMGLNVI ADEVINAIWFFLI AVVFQLSLL-----     | 283 |
| AgamOr45  | YETYQMHHFMSFVLCFVICMCMNVVARDPR-----STLIPFGLASTG-----         | 304 |
| TcasOr3   | ESIYSTQTFVQTFISLGEMCFSLYLLSETADQNI GNEITYLIATGFEL-----       | 328 |
| DmelOr88a | NDIFKVAFLVSNFVGAGSLCFYLFMLSETSDVLI IAQYILPTLVLVGF-----       | 320 |
| AgamOr22  | SSIYREVYLMQVLC SIVHICVSLFHIQIKFK-----NGSYGMLLTNVN-----       | 303 |
| DmelOr49a | NYVFGLLLASNLF TTSCLLCCMAYYTVVEGFNWEGISYMMLFASVAAQ-----       | 312 |
| DmelOr85f | NGIFYKSLLLSLLTTAAVICTVAVYTLIQPTLEGFTYVIFIGTSVMQ-----         | 309 |
| AmelOr119 | NKIYLSMLVQMISSSTSIICLTGFQAVVVGQSSNIMKYGIYLSAAMS-----         | 329 |
| DmelOr63a | NNCFRHITFTQFLLSLFNWGLALFQMSVGLGNSSITMIRMTMYLVAAG-----        | 334 |
| DmelOr67b | ENLFKYIILVQCSVSSILICMLLYKISTVLEVGWVWGMIMVYFVTIA-----         | 335 |
| BmorOr21  | QDTFNIWLGLIYVATMIQMCCTCMYHIVQSFNIDVRYIIFVISIHIYLP-----       | 313 |
| BmorOr11  | KVNFSILYEYNMKITTISMPLSAFQVVESLRREFNIEFTYFFFGCIL-----         | 313 |
| BmorOr12  | QIMCRTVFSANIMLDTFVLVILMLAMVNS ENDFYGLCSQMSSVLVTVV-----       | 317 |
| AgamOr33  | KRLYEPNIMAQFVCSMLIICLTA FELMFAKGDPMQMVRFGAYMLAGFY-----       | 289 |
| HvirOr1   | DEVISGVVVISFANNLFFICLQLFNTLEDGLKGTGECTQLNSQSKLKKIVVSKSGPLGGH | 339 |
| HvirOr5   | DVALGGIVILSCSCNFYFICLQMLFGITQGLSSDLLSLIYYVISLAWLCT-----      | 249 |
| TcasOr1   | RVFFT VFNVVHCYLA SELVLMKNRFVTLNVQLTKLTKNCATKAQSVVLG-----     | 267 |
| TcasOr2   | NEIYGVPLLLFFGLNFLIITQAMFLVVGQLQASQIHWQKIIIVMSSV-----         | 290 |
|           |                                                              |     |
| TcasOr16  | -----LAQVFHFCIFGNRLIEESSVM EAAYS---CHWYDGSEEA-----           | 427 |
| AmelOr2   | -----LGQVFMLCIFGNRLIEESSVM EAAYS---CHWYDGSEEA-----           | 430 |
| AgamOr7   | -----LAQVFLFCIFGNRLIEESSVM KAAYS---CHWYDGSEEA-----           | 430 |
| AaegOr7   | -----LAQVFLFCIFGNRLIEESSVM EAAYS---CHWYDGSEEA-----           | 414 |
| DmelOr83b | -----LAQVFHFCIFGNRLIEESSVM EAAYS---CHWYDGSEEA-----           | 438 |
| BmorOr2   | -----LGQVFHFCIFGNRLIEESSVM EAAYS---CQWYDGSEEA-----           | 424 |
| BmorOr2a  | -----LGQVFHFCIFGNRLIEESSVM EAAYS---CQWYDGSEEA-----           | 424 |
| HvirOr2   | -----LGQVFHFCIFGNRLIEESSVM EAAYS---CQWYDGSEEA-----           | 424 |
| AgamOr56  | -----IFQTFSF SYLGT ELIEQSEAVADAI FH---SKWYTQKLN R-----       | 347 |
| AgamOr57  | -----IFQTFSF SYLGT ELIEQSEAVADAI FH---SKWYTQKLN R-----       | 347 |
| AgamOr26  | -----MFQMF SF SYLGT ELIEQSEAVADGIFN---SKWY EEDVKV-----       | 347 |
| AgamOr27  | -----IFQTFSF SYLGT ELIEQSEAVADAI FH---SKWYTQKLN R-----       | 347 |
| HvirOr9   | -----LMQIFLYCYGDTIMRSMQVSTSIYN---SPWYNIRAAD-----             | 350 |
| HvirOr7   | -----LMQVFLCF FADLMTASLEISNAVYN---CRWYSANIKV-----            | 334 |
| DmelOr85b | -----MSQVYLICHY GQLVADASYGFSVATYN---QKWKADVRY-----           | 340 |
| DmelOr85c | -----LSQVYLICHY GQLIADASSLSISAYK---QNWQNADIRY-----           | 339 |
| DmelOr85d | -----MVQVFMIATHAQR LVDASEQIGQAVYN---HDWFRADLRY-----          | 362 |
| DmelOr67a | -----LLEVYLLCSFSQRLIDASENVGHAA YD---MDWLGS DKRF-----         | 358 |
| DmelOr67c | -----MVQVFMVCY YGDTLIAASLKVGDAAYN---QKWFQCSKSY-----          | 353 |
| DmelOr92a | -----LVQVFVVCY YGDEMISSSSRIGHSAFN---QNWLP CSTKY-----         | 358 |
| DmelOr69a | -----VLYNFVICYMGTEVTLASGKVLPAAFY---NNWYEGDLVY-----           | 345 |
| DmelOr69b | -----ITYNFMSCRSGTHLILTS GKVLPAAFY---NNWYEGDLVY-----          | 345 |
| TcasOr6   | -----VLELIVNSQGLETYARASDTLIPQCQL---VCKIFVLAKY-----           | 324 |
| TcasOr11  | -----DWGKNQAYKYKTD-----                                      | 285 |
| AgamOr41  | -----TMQLFLFC LLGTIIEDKGVKFSAGVYS---LTWNELSKQD-----          | 335 |
| AgamOr42  | -----VMQMLILCSLGT LIELKSDQFKDQLYD---IAWPEMDLPE-----          | 340 |
| AgamOr43  | -----VIQLFELCLLGTILSIKNEEIEHAFYD---SLWYLM DHSE-----          | 337 |
| AgamOr44  | -----VVQLFELCLLGTILSIKNEEIEHAFYD---SLWYLM DHSE-----          | 337 |
| AgamOr66  | -----VFQLFVYCLMGTVMQIMNERMIDYISN---LPWYMLPTEE-----           | 341 |
| AgamOr67  | -----VFQLFVYCLMGTVMQIMNERMIDYISN---LPWYMLPTEE-----           | 341 |
| AgamOr72  | -----FVQLSGFFVIGHLVELKIDAMYNKIIS---MPWYKLPKE-----            | 337 |
| AgamOr73  | -----FVQLSGFFVIGHLVELKIDALYNKIIS---MPWYR LPVKE-----          | 337 |
| AgamOr71  | -----FVQLSGYFVIGHLVEIKIDALYNKIIS---LPWYKLPVKE-----           | 337 |
| AgamOr74  | -----FVQLSGFFLIGHLVELKNDALYNKVIS---MPRYKLPVKE-----           | 337 |
| AgamOr70  | -----FIELSLYFLIGHLIEQKIDAMYNKIIS---MPWFKLPVKE-----           | 337 |
| AgamOr69  | -----FVELSIYFVIGHFVELKIDEMYSIIS---MPWYKLPVEE-----            | 341 |
| TcasOr9   | -----SIELLIYTYSGQVLTQNADIVG-TLYE---SPWYMC DVHF-----          | 246 |
| TcasOr18  | -----STELFIHTYSGQILTENADFLW-TLYE---CPWYLC DVTY-----          | 357 |
| DmelOr83a | -----LYELFIIICYFADIVFQNSQRCEALWR---SPWQRHLKDV-----           | 402 |
| DmelOr85e | -----IFELLMFTYCGELLSRHSIRSGDAFWR---GAWWKHAHFI-----           | 411 |

|           |                                        |                   |     |
|-----------|----------------------------------------|-------------------|-----|
| TcasOr24  | -----ITAI FVSSFGGQILIDSSLSVAEAAYS---   | SAWYEADIMK-----   | 333 |
| TcasOr25  | -----STATFIACYGGQLLMDASTSIADDEFYN---   | CPWYEADV KM-----  | 333 |
| TcasOr19  | -----IISLFTSCLAGQILLDSSTSVADALYN---    | SQWYTADV KL-----  | 298 |
| TcasOr22  | -----QAGFAAFSSAVTRVISESLTIPDAALD---    | SKWYEAPIKS-----   | 334 |
| TcasOr23  | -----ICSFFICCHAGQAVISESLTIPEAALD---    | SHWYEAPVKY-----   | 331 |
| AmelOr168 | -----LIQFYILCYCIQDLFEASTSIADVVY---     | EKWYSYDVRF-----   | 340 |
| AmelOr170 | -----LIQFYILCYCIQRLFEASSIADVVY---      | EKWYYYDVRF-----   | 347 |
| AmelOr169 | -----LIQFYILCYCIQQLLEASTTVADVVH---     | EKWY LHDVKF-----  | 353 |
| DmelOr65b | -----ALGHLSMWSYCGDQLSQSLQISEAAAYE---   | AYDPTKGSKD-----   | 335 |
| DmelOr65c | -----ALGHLSMWSYFGDLLSQSLTISEAAAYE---   | AYDPIKGSKD-----   | 335 |
| DmelOr65a | -----TLGHLSFWSKFPGDMFSKESEQVALAVYE---  | AYDPNVGSKS-----   | 367 |
| TcasOr17  | -----                                  | -----             |     |
| TcasOr21  | -----                                  | -----             |     |
| TcasOr56  | -----MLFQLLCYCWHGNEVQIVSGELSRYA FG---  | INWIIM-RES-----   | 383 |
| TcasOr15  | -----                                  | -----             |     |
| AgamOr9   | -----LVIQVVQYCYFGNEINYMAQKVHQATAF---   | VNYPDM-NIK-----   | 366 |
| AgamOr65  | -----LVIQVAQYCYFGNEINYMAQKVHRATAF---   | VNYPDM-NIK-----   | 369 |
| BmorOr6   | -----ILGQLYLYCWCANELTTKSEQLRDTLYL---   | TPWYDQ-DMK-----   | 339 |
| BmorOr10  | -----MLSQLFQYCWCGHELTIRGEELRETLYQ---   | SPWHEQ-DIR-----   | 336 |
| AgamOr34  | -----MTMQIGLPCYYGNEVTLKSYALTNAIYS---   | SRWYDM-PQS-----   | 328 |
| AgamOr37  | -----MIFQMFLPCRFGNEVTRKSHLLRTSIYS---   | SRWYEM-GLQ-----   | 340 |
| DmelOr94a | -----MILQIYLP CYYGNEITVYANQLTNEVYH---  | TNWLEC-RPP-----   | 337 |
| DmelOr94b | -----MIVQIFLPCYYGNELTFHANALTNSVFG---   | TNWLEY-SVG-----   | 333 |
| DmelOr71a | -----MIMQVMLPTIYGNVIDSANMLTDSMYN---    | SDWPD M-NCR-----  | 328 |
| DmelOr46a | -----MLIQIFILCY YAGEVTQRSLDLPHELYK---  | TSWVDW-DYR-----   | 330 |
| DmelOr46b | -----MLWQIFIIICYASNEVTVQSSRLCHSIYS---  | SQWTGW-NRA-----   | 333 |
| HvirOr8   | -----MILQILVPCWFGQRIIDKSNLLAFSAYD---   | CEWTSE-TRQ-----   | 345 |
| BmorOr8   | -----MTLQIFVPAWMTQLHFQSQELVFAAYN---    | SEWIPR-CQS-----   | 342 |
| AmelOr68  | -----MMTQIFVYCYWGNQLKLSVEVVD TIFE---   | LDWISL-DNR-----   | 324 |
| AmelOr69  | -----MLTQIYIFCYWYGNVTKLSLDISNMIFE---   | LDWPD L-DNT-----  | 319 |
| AmelOr70  | -----VLVQILYCYWFSNEVKLSLEVPGMIFK---    | SDWTSW-DDK-----   | 321 |
| AmelOr71  | -----SLMQIFYYCWFSNEVKLSLELSDMIFR---    | SNWTS L-NNN-----  | 320 |
| AmelOr72  | -----ALIQIFYFCWHGDI AKYKSL EIPDMIFN--- | SNWPNL-SNE-----   | 321 |
| DmelOr19a | -----LTTETLLL CYTAELPCKEGESLLTAVYS---  | CNWSLQ-SVN-----   | 333 |
| DmelOr19b | -----LTTETLLL CYTAELPCKEGESLLTAVYS---  | CNWSLQ-SVN-----   | 333 |
| DmelOr33a | -----MLIELFPSCYYGILMTMEFDKLPY AIFS---  | SNWLKM-DKR-----   | 328 |
| DmelOr33b | -----MVLELFPCCYYGTLISVEMNQLTYAIYS---   | SNWMSM-NRS-----   | 330 |
| DmelOr22a | -----VSMETFPFCYLCNMIIDDCQEMS NCLFQ---  | SDWTS A-DRR-----  | 342 |
| DmelOr22b | -----VSMQTFPFCYLCNMIMDDCQEMADSLFQ---   | SDWTS A-DRR-----  | 342 |
| DmelOr42b | -----ILLQTFPFCYTCNLIMEDCESLTHAIFQ---   | SNWVDA-SRR-----   | 342 |
| DmelOr59b | -----ILLQTFPFCYTCNMLIDDAQDLSNEIFQ---   | SNWVDA-EPR-----   | 343 |
| DmelOr59c | -----ICTESFPCCMLCEHLIEDSVHVSNALFH---   | SNWITA-DRS-----   | 346 |
| DmelOr98a | -----LMVQTFPFCYVCDLLKDKCELLVSAIFH---   | SNWINS-SRS-----   | 340 |
| DmelOr42a | -----VLLETFPFCILCNYLDCYKLADALFQ---     | SNWIDE-EKR-----   | 345 |
| DmelOr85a | -----ILSQTFFPCYVCEQLSSDCESLTNTLFH---   | SKWIGA-ERR-----   | 340 |
| DmelOr43b | -----VLLQTFPLCFYCNAIVDDCKELAHALFH---   | SAWVVQ-DKR-----   | 345 |
| AgamOr2   | -----MFAFYWHANEVLEQSLGIGDAIYN---       | GAWPDFE EP-----   | 328 |
| AgamOr10  | -----IFAFYWHSNEVREESMAIAQASYS---       | GPWLNVD D T-----  | 325 |
| DmelOr30a | -----SVVLYYVANELYFQSFDAIAAAYE---       | SNWMDFDV D-----   | 327 |
| DmelOr49b | -----ILALYWYANELREQNLA VATAAYE---      | TEWFTFDV P-----   | 325 |
| DmelOr43a | -----LFTYYNRANEICLENNRVAEAVYN---       | VPWYEAGTR-----    | 325 |
| AgamOr32  | -----AAIYTYHGS AISAKSVSVADAIYG---      | TNWDAPLAV-----    | 329 |
| AgamOr35  | -----AVIYCYHGSMYDES LKVADAIYQ---       | SNWYEAPP AE-----  | 339 |
| DmelOr47a | -----AYIYCYCGENLKTESASF EWA IYD---     | SPWHESLGAGG-----  | 333 |
| DmelOr98b | -----VSIYFCGSSIHSECQLFGQAIYE---        | SSWPHLLQEN-----   | 332 |
| DmelOr9a  | -----LFIYSKCGENIKSASLDFGNGLYE---       | TNWTDFSPPT-----   | 344 |
| AgamOr38  | -----LFMYSYGGTVVRESSEAIQT VAYG---      | FPWYQFDRNT-----   | 360 |
| AgamOr39  | -----LFLYSYSGTIIRDSSEAVQTVAYD---       | FPWYRYDRNT-----   | 361 |
| DmelOr24a | -----IFLYCLGGSHIMEACSNLARSTFS---       | SHWYGH SVRV-----  | 340 |
| DmelOr45b | -----IFLYCYGGTEMSTESLSLG EAAYS---      | SAWYTWDR ET-----  | 349 |
| AmelOr74  | -----HIIFFTYICHGLMEESGNVGLATYS---      | GWWTTLPMNE-----   | 345 |
| AmelOr86  | -----HIIFFTYICGGLIEESSNIGLATYS---      | GWWTVLPME-----    | 344 |
| AmelOr75  | -----QLLIFFTYSCDNLIRQSVNVGNVAVFS---    | GPWVNLPM SK-----  | 344 |
| AmelOr84  | -----QLLMFTYSCDDLIRESVNVGNVAVFS---     | GPWAE LPM DK----- | 341 |
| AmelOr87  | -----QLLLFTYSCDSL IQESTNVGS AVYS---    | GPWICLPMNR-----   | 369 |
| AmelOr76  | -----QLLMFTYSCDCLIRDSMDIADAAYN---      | CSWSFLPM DK-----  | 347 |
| AmelOr85  | -----QLLMFTYSCDCLIRDS T NIANATYN---    | SLWSFMPM DK-----  | 352 |
| AmelOr88  | -----QLLMFTYSCDCLMHDSMSVANAAAYN---     | SLWPCLPM DK-----  | 350 |
| AmelOr91  | -----QLLMFSYSCDCI IRESVSVATAAYG---     | GPWTLLPMTI-----   | 351 |
| AmelOr92  | -----QLLMFSYSCDCILRESVSVATAAYE---      | GPWTLLPMTI-----   | 348 |

|           |                                                      |     |
|-----------|------------------------------------------------------|-----|
| AmelOr95  | -----QLLMFTYSCDCI IRESLSVATAANR-----GPWPMPMTT-----   | 347 |
| AmelOr93  | -----QLLMFSYSCDCIIRWTLX-----PLLSMTS-----             | 325 |
| AmelOr77  | -----                                                |     |
| AmelOr94  | -----QLWMFTYSCDCMTRESVNVASAVYC-----IPWTRIPMDK-----   | 346 |
| AmelOr96  | -----QLWMFTYSCDCITQESAKIASAAYA-----SPWINLPMDK-----   | 346 |
| AmelOr79  | -----LLFMVITYSCNGVTEHSDNVAIGAYS-----ALWTIVPMDK-----  | 346 |
| AmelOr83  | -----LLFMFTYSCNDVMEHSDNVAIGAYS-----ALWTILPMDK-----   | 351 |
| AmelOr80  | -----LLFMVITYSCNGVIEHSDNVAVGAYS-----ALWTIMPMDK-----  | 349 |
| AmelOr81  | -----LLFMVITYSCNGVIEHSDNVAIGAYS-----ALWTIMPMDK-----  | 346 |
| AmelOr82  | -----LLFMVITYSCNGVIEHSDNVAIGAYS-----ALWTIVPMDK-----  | 348 |
| AmelOr78  | -----LLFMFTYSCNGVMEQSDNVAVGTY-----ALWTVMPMEK-----    | 348 |
| AmelOr89  | -----LLFMFTYSCNCVTEHSENIAGAYS-----ALWTAMPMDK-----    | 345 |
| AmelOr90  | -----LLFMFTYSCDGVIEQSDNVAVGAYS-----ALWTIMPMDK-----   | 346 |
| AmelOr142 | -----ELFMYAWPADSLMHMTMKMATKVYN-----MDWYGKDIR-----    | 320 |
| AmelOr146 | -----AVFMCAPADYLMVDSENTMRAVYE-----SEWYKRSLK-----     | 320 |
| AmelOr148 | -----EIYMYAWPADHMQDASINILRSAYN-----SIWYEQSLD-----    | 317 |
| AmelOr158 | -----QIYIYAWPADHYMDMSINVLRSAYN-----SIWYEQTL-----     | 318 |
| AmelOr147 | -----EIYMYAWPADHYMDMSITVLQSVYD-----SMWYGQTLN-----    | 318 |
| AmelOr150 | -----EIYIYTWPANHMKDMSINVSQSIYN-----ITWYKQTLR-----    | 320 |
| AmelOr151 | -----EIYIYAWPADYMKDMSINVSQSVYN-----ITWYKQTLR-----    | 320 |
| AmelOr152 | -----EIYMYAWPADHMKDMSINVSQSVYN-----TIWYEQTLR-----    | 320 |
| AmelOr154 | -----EVYMYAWPADYVKNMSINISRSVYE-----LSWYEQTIE-----    | 320 |
| AmelOr155 | -----EIYIYAWPADYVKNMSINISQSVYE-----LSWYEQTLE-----    | 320 |
| AmelOr157 | -----EIYLYALPADYMYDMSMNI SRSVYD-----SIWYEQRLD-----   | 317 |
| AmelOr156 | -----EVYLYAWPAQYMDDMSKNVSI SAYN-----LKWYEQTSE-----   | 320 |
| AmelOr153 | -----NYYMYIWPADYMTDKSINVS RKIYD-----SMXYKQMLK-----   | 296 |
| AmelOr144 | -----HLFVIWSPADDLRESSIQFAESIND-----IQWLGQSKK-----    | 321 |
| AmelOr145 | -----HLFVIWSPADDLRESSIQFAESIND-----IQWLGQLKK-----    | 322 |
| AmelOr143 | -----HLYVIWSPADDLRESSVQFSNSISD-----IQWLGQSNK-----    | 316 |
| AmelOr1   | -----FVNVFIIISFIDRLKQESERIRETSYF-----IPWYDFPTE-----  | 350 |
| AmelOr3   | -----FVNVFIIISFIDRLKQESERIGQTSYF-----LPWYEFPTE-----  | 353 |
| AmelOr6   | -----ILVTYIVCYIGQLLIDESNNLARTCIT-----LNWYHFPTR-----  | 345 |
| AmelOr7   | -----IFVTYIVCYIGQLLIDESNNLARTCIT-----LNWYHFPTR-----  | 345 |
| AmelOr4   | -----TLMIIYICYIGQLLIDESNNLAQTCIT-----LNWYRFPKK-----  | 347 |
| AmelOr5   | -----IFIYIYICYIGQLLIDESNNLAQQCIT-----LSWYHFPTR-----  | 347 |
| AmelOr8   | -----VFGTFSICYVQQLLVDESESVRQACKT-----LKWYRLPTK-----  | 347 |
| AmelOr9   | -----VFGTFSICYVQQLLVDESESVRQACNT-----LKWYRLPTK-----  | 347 |
| AmelOr11  | -----VIGTFSVCYVQQLLIDESENIRQAYNT-----LNWYRLPVK-----  | 345 |
| AmelOr12  | -----FIGTFAVCYAGQLLVDESESVRQACST-----LNWYRLPVK-----  | 347 |
| AmelOr10  | -----LIGSFSVCYVQQLLIDESENIRQAFIA-----LKWYQLPVK-----  | 346 |
| AmelOr14  | -----ISCTFIMCYVQQLLIDESGNNVRRMSIT-----LDWYRFPVK----- | 349 |
| AmelOr15  | -----FGVTFTMCYVQQLLIDESGNNVRRMSIT-----IDWYRFPVK----- | 350 |
| AmelOr13  | -----IFCTLLICYIGQLLIDESDKVRQISVT-----LDWYRLPVN-----  | 341 |
| AmelOr16  | -----IFCVFIIICYIGQLLVDESVRQASST-----INWYRLSIK-----   | 352 |
| AmelOr17  | -----IFCFIICYIGQLLVDESVRQASST-----INWYRLSIK-----     | 352 |
| AmelOr18  | -----TFNIFIFCYIGQLLAEQTVKVGESY-----IDWHRMPWK-----    | 361 |
| AmelOr19  | -----TFNIFIFCYIGELLAEQTVKVGKFY-----IDWYRMPWK-----    | 361 |
| AmelOr22  | -----TFNIFIFCYIGELVAEQCKKIGEISY-----VDWYRLEGN-----   | 362 |
| AmelOr24  | -----TFNIFIFCYIGELVAEQCKKIGEISY-----VDWYRLEGN-----   | 354 |
| AmelOr20  | -----TFNIFIFCYIGELVAEQCKKIGEISY-----IEWYRLMGN-----   | 358 |
| AmelOr25  | -----TFNIFIFCYIGDGVAEQCKKIGEMAY-----IEWYRLTGK-----   | 353 |
| AmelOr29  | -----TFNIFIFCYIGELVAEQTEKVEVAY-----IEWYRIRGK-----    | 354 |
| AmelOr30  | -----TFNIFIFCYIGDLVAEQCKKIGEMTY-----IEWYRLTGK-----   | 354 |
| AmelOr21  | -----IFNIFVFCYIGELLDQSRKIGEVTY-----IEWYRLSGK-----    | 354 |
| AmelOr23  | -----IFNIFIFCYIGELLDQSRKIGEVTY-----IEWYQLFGK-----    | 354 |
| AmelOr35  | -----IFNIFILCYIGELSECKSIGLSAY-----IDWYRLPGK-----     | 363 |
| AmelOr27  | -----CFNIFIICYIGELTEQCKMIGEVVY-----TDWYLLPDK-----    | 356 |
| AmelOr28  | -----CFNIFIICYIGELTEQCKMIGEVVY-----TDWYLLPDK-----    | 356 |
| AmelOr33  | -----IFNIFIICYIGDILTEQCKMIGEA-----TNWYLLPDK-----     | 358 |
| AmelOr34  | -----IFNIFIICYIGDVLTEQCKMIGEA-----TNWYLLPDK-----     | 358 |
| AmelOr32  | -----IFNIFIICYIGDILTEQCKMIGEA-----TNWYLLPDK-----     | 358 |
| AmelOr31  | -----SFNIFIICYIGDILMEQCKMIGEVLY-----TNWYLLPDK-----   | 357 |
| AmelOr36  | -----TLNTFLICYIGELVTERCKEIGNMVY-----TNWYRLPKK-----   | 354 |
| AmelOr37  | -----TLNTFLICYIGELVTERCKEIGNMVY-----TNWYRLPKK-----   | 355 |
| AmelOr38  | -----TLNTFLICYIGELVTERCKEIGNMVY-----TNWYRLPKK-----   | 356 |
| AmelOr39  | -----IFSTFLICYIGELVTERCKEIGNMVY-----TNWYQLHDK-----   | 356 |
| AmelOr47  | -----TLNTFLICYIGELVTERCKEIGNMVY-----TNWYRLPKK-----   | 355 |
| AmelOr48  | -----ILSTFLICYIGELVTERCKEIGNMVY-----TNWYHLPDK-----   | 355 |
| AmelOr40  | -----ALSTFLICYIGELVTEKCKEIGNMVY-----TNWYRLSDK-----   | 355 |
| AmelOr43  | -----TLNTFLICYIGELVSEKCKKISNMIY-----TNWYRLSEK-----   | 356 |

|           |                                                         |     |
|-----------|---------------------------------------------------------|-----|
| AmelOr45  | -----SLGTFLICYVGEILTEKCKEIGNMVYM---TNWYRLPKK-----       | 355 |
| AmelOr41  | -----ILSLFLICYISEVLNEKCKEIGNIVYM---TNWYRLSDK-----       | 355 |
| AmelOr42  | -----ILSLFLICYISEVLNEKCKEIGNIVYM---TNWYRLSDK-----       | 355 |
| AmelOr44  | -----ILNTFLICYIGEILSEKCKKISDMIYM---TNWYQLSDK-----       | 355 |
| AmelOr46  | -----TCNIFLICYIGEILTEQCKKIGEIIM---TNWYELSNK-----        | 354 |
| AmelOr49  | -----TYNIFLVCYIGEIIITECKKIGDIVYM---TNWYELSDK-----       | 355 |
| AmelOr50  | -----SFNILLVCCIGEILREQCKKVGDMVYM---TNWYQLPDK-----       | 357 |
| AmelOr26  | -----VFNIFIFCYIAEIVTEQCKKVGKIFYM---TEWYQLPHK-----       | 360 |
| AmelOr53  | -----TFNIFIFCYIGEILTEQCSQIGTVSYE---IDWYKLSPK-----       | 361 |
| AmelOr54  | -----TFNIFIFCYIGEILTEQCSQIGTVSYE---IDWYKLSPK-----       | 359 |
| AmelOr52  | -----TFNIFIFCYIGEILSEQCSQIGTISYE---INWYKLPK-----        | 356 |
| AmelOr51  | -----TFNILIFCYVGEILLGQSEIATALYE---IEWYNLPGR-----        | 358 |
| AmelOr55  | -----TFNMFLCYIGDLLIHKSGNIGVAVFM---IDWYHLPK-----         | 357 |
| AmelOr57  | -----TFNMFLCYIGDLLIEKSGNVGAVFM---IDWYHLPK-----          | 357 |
| AmelOr56  | -----TFNMFLCYIGDLLIQKSSNIGVAVFM---IDWFHLPK-----         | 357 |
| AmelOr58  | -----VFNIFLICYIGNLLIEKSSNIGIVCCM---IDWYQLPIK-----       | 359 |
| AmelOr59  | -----IFNIFILCYIGELLMEKSSNIGLSCFM---IDWYKLSPK-----       | 360 |
| AmelOr60  | -----TFNIFILCYIGELLMEKSSNIGLSCFM---IDWYHLPK-----        | 360 |
| AmelOr61  | -----TFNIFILCYIGERLMEKSSNIGLSCFM---IDWFQLPK-----        | 360 |
| AmelOr63  | -----LIQLFAYSVVEYLKQTQTEGLGNSIYF---CTWYDMPKN-----       | 346 |
| AmelOr64  | -----LIQLFAYSVVEYLKQTQTEGLGNSIYF---CTWYDMPKN-----       | 342 |
| AmelOr66  | -----LIQLFAYSVVEYLKQTQTESLGNSVYF---CTWYEMPKN-----       | 342 |
| AmelOr65  | -----LIQLFAYSVVEYLKQTQTESVGNVYF---CTWYDMPKN-----        | 342 |
| AmelOr67  | -----LIQLFAYSVVEYLKQTQTEGIGNSVYF---CTWYDMPKN-----       | 342 |
| AmelOr114 | -----YVMLQLYLYCYVGERLSVESMEIVNAAYN---TEWYTLPTN-----     | 321 |
| AmelOr115 | -----YTMLHLFIYCYVGETLLGQSTGIGLSTYH---CNWYDLPSR-----     | 344 |
| AmelOr118 | -----VNCEAFILCYTGEYITSKSENINKAVYN---FLWYNLKP-----       | 322 |
| AmelOr164 | -----LNFEALILCYTGEYLSSKSENISWIAYN---SNWYELSIY-----      | 334 |
| AmelOr163 | -----ANCEAFILCYTGEYLMFKNESIVHAAAYD---TLWYNLNP-----      | 336 |
| AmelOr165 | -----ICLEAFIYCFAGEYLRK-----                             | 307 |
| AmelOr166 | -----VCSEAFIYCFAGEYLSIKSKLIADTAYE---FLWYMNPN-----       | 325 |
| AmelOr167 | -----ITLEAFIFSIAAGEYLSNKSLSVSIAYE---SPWYLLSPK-----      | 336 |
| DmelOr35a | -----SLGQIGSDLAFTTDSLSTMYL---THWEQILQYSTN-PS--          | 350 |
| DmelOr74a | -----ALGMLGSILLKTTDELGMMYYT---ADWEQVIHQSDN-VG--         | 351 |
| AgamOr3   | -----VTVETYGYGYFGTDLTTESYVALAIYD---SEWYKFSIS-----       | 359 |
| AgamOr5   | -----LTVETYGFCYFGSDLTSELSVARAAYG---SLWYRRSVS-----       | 340 |
| AgamOr13  | -----DTTETIAYCYFGEQLSNE SARVAHTVYE---SGWETQTPD-----     | 339 |
| AgamOr15  | -----DTTETFAICYLGEKLSYESARVAHTIYE---SGWETQTTD-----      | 338 |
| AgamOr17  | -----DTTETFAICYLGEKLSYESARIAHIVYK---NGWERQHAY-----      | 338 |
| AgamOr16  | -----DTTETFGYCYLGNQLSDESARVASVYD---CRWEGMPPA-----       | 336 |
| AgamOr55  | -----VSTETFGYCYLGTQLSMESARIAVAVYN---GKWEQQPRE-----      | 339 |
| AgamOr18  | -----VSIETFGYCYLGTQLSQESINVGQALYA---SGWYEDVQ-----       | 346 |
| AgamOr14  | -----ITIETFSACYFGEQLSQAVALSKSVYG---CGWPAMDRD-----       | 360 |
| AgamOr51  | -----ITIETFSACYFGEQLSQAVALSKSVYG---CGWPAMDRD-----       | 348 |
| AgamOr12  | -----LTPEMFGYCFFCSDLTTTGTISRQMYE---FQWERHRPA-----       | 349 |
| AgamOr19  | -----LTPEMFGYCFFCSDLTTTGTISRQMYE---FQWERHRPA-----       | 349 |
| AgamOr20  | -----MTLEMFGYCFFCTELATTGLIACQSYE---FRWEEHDPK-----       | 349 |
| AgamOr21  | -----MTLEMFGYCFFCTELDTTGTKIVSRQMYE---FRWEQHRPT-----     | 346 |
| AgamOr50  | -----MTSEMFGYCLFCTELTNTATTISQIYV---FQWEKHSVA-----       | 348 |
| AgamOr29  | -----VTVETYTYCTLGTQLTDKGEVLMALQQ---LAWYDQPSIP-----      | 337 |
| AgamOr53  | -----VSIETYAYCMLGSLTTQGEDLLMALQQ---LSWYDQSPV-----       | 327 |
| AgamOr30  | -----LTCETYSYQLGTQFTSNAEEVLDELQQ---LARYDQPSIP-----      | 338 |
| AgamOr46  | -----LSTETFI FCLLGNELTLKGLEISTAMYS---TNWYDQPVK-----     | 338 |
| AgamOr47  | -----LSTETFI FCLLGNELTLKGLEISTAMYF---TNWYDQPVK-----     | 338 |
| AgamOr48  | -----IFIEMMCFSYLGNQLTEENANISHSAFN---CRWYDEPIV-----      | 348 |
| AgamOr49  | -----LTVENLCFSYFGNRLSTENTSVIAIVYS---TDWYNPPC-----       | 355 |
| AgamOr61  | -----LVFQSFILCRGIEKLNLDLNEAIGQALYSG---FDWPDMLQY-DQ-RFRR | 365 |
| AgamOr62  | -----LILESLLLRCGVEDLNDLNRQIGTILYN---FDWPRLLRF-SI-HYRR   | 362 |
| AgamOr63  | -----FLTESFLLCHGVENLRDLKPRIASTVYD---FDWMLQMRCPNP-RHRA   | 358 |
| AgamOr60  | -----LVAESFLFCRILSQINDLHARIGTMCE---LEWYDKLRF-ST-RFAS    | 359 |
| AgamOr75  | -----IYFLETFGMCMLEMLVQLNRKVSTSLYG---FSWPQYLR-----       | 358 |
| AgamOr76  | -----IYFFETFGMCMLEMLVQLNRKVSTSLYG---FSWPQYLR-----       | 358 |
| AgamOr78  | -----LFLSKTFGMCMLEMLVQLNRKVSTSLYG---FSWPQYLR-----       | 359 |
| AgamOr77  | -----IYLLELFQYCWQVDEMELLLHEGQAFVYS---TPWTGAIMQ-----     | 337 |
| AgamOr79  | -----IYLLELFQYCWQVDEMELLLHEGQAFVYS---TPWTGAIMQ-----     | 335 |
| AmelOr99  | -----FHLFLLSLPGQILLDHCADFANAIYD---STWYGTSL-----         | 355 |
| AmelOr101 | -----FHLFLLSLPGQILLDHCADFANAIYD---TTWYGTSL-----         | 355 |
| AmelOr102 | -----FHLFVLSLPGQVLLDHCSEFSNNIYS---CIWYRAPVR-----        | 354 |
| AmelOr103 | -----FHLFVLSLPGQVLLDHCSEFSNNIYN---CIWYRVPVR-----        | 354 |
| AmelOr104 | -----FHLFVLSLPGQVLLDHCSEFSNNIYS---STWYRIPVK-----        | 355 |

|           |                                                        |     |
|-----------|--------------------------------------------------------|-----|
| AmelOr98  | -----FHLFVLSLPGQILLDHCAELSNTIYC---SMWYKLPVK-----       | 352 |
| AmelOr100 | -----FHLFILSIPGQILLNHYSNLKNNIFM---SSWYNMPIE-----       | 275 |
| AmelOr97  | -----FHLFIITLTGQVIADQSSKLSNNMYC---TTWYRMPNN-----       | 299 |
| AmelOr105 | -----FHLFYAISLPGETLLNQSSKLADKIYD---SEWYKIPMK-----      | 355 |
| AmelOr109 | -----IHLFFLTIMGQFLINANEETFKTIYE---ADWYNGSSK-----       | 343 |
| AmelOr110 | -----THLFFLTIMGQFLINANEEIFRTIYE---ARWYNGSSK-----       | 342 |
| AmelOr111 | -----THLFFLTIMGQFLINANEEIFKTIYE---ARWYNGSSR-----       | 343 |
| AmelOr108 | -----THLFFLTIMGQFLINANDEIFNTIYE---AHWYNGSSR-----       | 343 |
| AmelOr107 | -----THLLFLVMVGQFLIDSNEEVFKTIYD---ARWYYGSSK-----       | 343 |
| AmelOr112 | -----FHTFILTVOGQFVINELQDVYESIYE---SPWYTFSPR-----       | 340 |
| AmelOr113 | -----MHLCYVMIQGQFVIDSCNEIYYSIYE---ASWYNINPK-----       | 341 |
| AmelOr106 | -----VHIFFLTAQGQFVIDSHDNVYRDMYE---PYWYNVQYK-----       | 339 |
| AmelOr122 | -----MIAFYNNHCGQLIIDSNLGIFNELFA---STWYRIPLK-----       | 314 |
| AmelOr125 | -----MIAFYNNHCGQLIIDSNLGIFNELFA---STWYRIPLK-----       | 313 |
| AmelOr123 | -----MMALYNNHYGQLIINSNHGIFNELCA---STWYRIPLK-----       | 311 |
| AmelOr126 | -----MMALYNNHYGQLIINSNHGIFNELCA---STWYRIPLK-----       | 311 |
| AmelOr127 | -----MTALYNNHYGQLIINSNHGIFNELCA---STWYRIPLK-----       | 311 |
| AmelOr128 | -----MIAFYNNHCGQLIIDSNLGIFNELYA---STWYRIPLK-----       | 311 |
| AmelOr129 | -----MIAFYNNHCGQLIIDSNFGIFKELYA---STWYRIPLK-----       | 311 |
| AmelOr133 | -----VIMFLCNHTAQILINNNEEFFHELYI---SVWYSVPLK-----       | 216 |
| AmelOr134 | -----VFIFLCNHTAQILINNSEEFFYELYI---SVWYFVPLK-----       | 312 |
| AmelOr131 | -----MIMFLCNYNGQILINSNEEFFHELYI---PVWYFVPLK-----       | 314 |
| AmelOr132 | -----MIMFLCNYNGQILIDNSEELFDELYF---SIWYFVPLK-----       | 314 |
| AmelOr135 | -----IIMFLCNHSGQLIDNSQKLFNELYI---SIWYFVPLK-----        | 312 |
| AmelOr136 | -----VITFLNNCNQILIDNSQELFIELYI---SMWYFVPLK-----        | 314 |
| AmelOr138 | -----IITFLCNYNQILIDNSQELLDELYI---SAWYFVPLK-----        | 220 |
| AmelOr130 | -----VIIFLNNYNGQIVMNSSQELFDELYN---SMWYFMPLK-----       | 314 |
| AmelOr137 | -----                                                  |     |
| AmelOr139 | -----MIMFICNYSSQILIDNSQELLYDLYI---SMWYFVPLK-----       | 236 |
| BmorOr20  | -----IQLSVIVESVGTVTGRLKDAVYE---VPWEYMDTSN-----         | 390 |
| BmorOr3   | -----IQLSVIVESVGTVTGRLKDAVYE---VPWEYMDTSN-----         | 390 |
| BmorOr18  | -----IQLSVIVESVGTVTGRLKDAVYE---VPWEYMDTSN-----         | 390 |
| HvirOr6   | -----IQLSVIFELVGTESEKLRKDAVYG---VPWDCMDTKN-----        | 380 |
| BmorOr23  | -----IQISVIFELLGYMSDKLQDAVYC---VPWEYMDTSH-----         | 367 |
| BmorOr16  | -----IQISVIFELLGYMSDKLQDAVYC---VPWEYMDTSH-----         | 367 |
| BmorOr4   | -----IQISVIFELLGYMSDKLQDAVYC---VPWEYMDTCH-----         | 366 |
| BmorOr5   | -----IQISVIFELLGYMNDKLQEAIVYC---VPWEYMDTSH-----        | 367 |
| BmorOr22  | -----IQVSMIFEILGFLSDKLPNAVYS---IPWEAMNVTN-----         | 374 |
| BmorOr17  | -----IQVSMIFEILGFLSDKLPNAVYS---IPWEAMNVTN-----         | 374 |
| BmorOr1   | -----IQISIFELLGVSADRIPDAVYQ---LPWECMDVKN-----          | 381 |
| BmorOr1a  | -----IQISIFELLGVSADRIPDAVYQ---LPWECMDVKN-----          | 381 |
| BmorOr1b  | -----IQISIFELLGVSADRIPDAVYQ---LPWECMDVKN-----          | 381 |
| BmorOr19  | -----IFLSIVLEEIRRQNYDLCEYVYA---LPWEGMSLEN-----         | 359 |
| BmorOr15  | -----IFLSIVLEEIRRQNYDLCEYVYA---LPWEGMSLEN-----         | 359 |
| TcasOr5   | -----NAVLNAEYETVLDVFWWT-----                           | 263 |
| TcasOr7   | -----VMNEIICERFRSKAANKYR-----                          | 278 |
| HvirOr4   | -----CVTHMLRMIIVVVEPGHYTIAEGKRTEGLVC---RLMTSAPSTG----- | 342 |
| BmorOr13  | -----CLYHTFGLVMIIEPCHRTHEEMETTRELVS---RVMCSADPRD-----  | 389 |
| DmelOr10a | -----QLLVYCYGGTLVAESSTGLCRAMFS---CPWQLFKPKQ-----       | 359 |
| DmelOr33c | -----QLFPSCYFASEVAEELERLPAIFIS---SRWYDQSRDHR-----      | 333 |
| DmelOr7a  | -----TAPCCYQATSLMLDNERLALAIQ---CQWLGQSAR-----          | 355 |
| DmelOr22c | -----LFLYCFGGNHVSESSAAVADVLYD---MEWYKCDART-----        | 355 |
| AgamOr1   | -----QVFIFCYVGNIEISYTTDKFTEFVGF---SNYFKFDKRT-----      | 365 |
| AgamOr4   | -----TFLYCLLGTRLATQQQLLEHALYA---TRWYNYPIAF-----        | 343 |
| DmelOr47b | -----IQLSLWCVSGTLVYTSVEVAQAAFDI---NDWHTKSPG-----       | 363 |
| AmelOr73  | -----QVYLXWFGNEVTLKSNKVSDAIYE---MDWTILPSN-----         | 314 |
| AgamOr68  | -----FVLGAIIERKVDDLHISLMH---FPWYLMDDRR-----            | 341 |
| DmelOr59a | -----QIFPSCFFGTDNEYWFGRHLHYAASF---CNWHTQNRS-----       | 329 |
| DmelOr23a | -----QTYPLCYGTMVQESFAELHYAVFC---SNWVDQSASY-----        | 327 |
| AgamOr31  | -----VTYYCYYSQLYYESTQVHDVAVFK---SKWYDASVAT-----        | 324 |
| DmelOr2a  | -----LEVFCVYFGDRMRTQSEALCDFAYD---CNWIEQLPKF-----       | 349 |
| AmelOr62  | -----LIQLYLYAYAGDALESRTTEIAQAAPH---SFWYQSRGR-----      | 349 |
| AmelOr121 | -----QTFLYFMAGQMLVTQSEVHNAAYE---CEWVSLKYTK-----        | 345 |
| AmelOr140 | -----HIFFLCLPGQRLLNHSEELHVSACE---VTWYIFPKKY-----       | 311 |
| TcasOr12  | -----EIYLWCFYGNVMLKSDQLTQAAYM---SEWLDGTEEF-----        | 341 |
| AgamOr8   | -----VFLLCYGNKLVIVASSQIPYSAFE---GNWIGASVSY-----        | 343 |
| BmorOr9   | -----LIMSVFGENLISESRIAEEAFL---CKWYEMDQKS-----          | 329 |
| AgamOr40  | -----ELYLYCFLGQTLKNQGLKVGDALWK---SPWHLCGASY-----       | 406 |
| TcasOr63  | -----QVATYCYGHEVMTTSDAIGMSLYL---SNWYASHVK-----         | 331 |
| TcasOr4   | -----WLPYNTKKYYPTVIFQVMSVSVSAYNN---SSIDVLTCLMLIT-----  | 333 |



|           |                                                               |     |
|-----------|---------------------------------------------------------------|-----|
| TcasOr13  | -----HVLRLLLIVEPCHGCILVAKTTTQLVCK---LLCLDLKKEVK-----          | 357 |
| AgamOr24  | -----SVQIFYICFLGTSLELKGVTNALTGKIGAIHWDKLSGRD-----             | 329 |
| AgamOr54  | -----VQLFFSFCALGETFNKISDELTVAIYN---VPWYNMEVRD-----            | 316 |
| AgamOr23  | -----CALGTFLLSSKNEKLVVEEIIYN---VNWYGLTTKH-----                | 333 |
| AgamOr64  | -----TLLFCCKSIDSVNDLHTEVGYIMYS---EYWPATLQYADQGLSTE            | 365 |
| DmelOr82a | -----QLFIYCYGGEI IKAESLQVDTAVRL---SNWHLASPKT-----             | 337 |
| AmelOr116 | -----QIFIYCWHGNELYLHSMKICLSAYK---NNWNNNNKN-----               | 349 |
| AmelOr160 | -----ILLAFCYCFLGECLINESEVQMACYF---TNWYDLPEQY-----             | 342 |
| TcasOr10  | -----SFILSLDISNVIFYVDWLDDEVYKS-----                           | 297 |
| TcasOr26  | -----VGTTVYN---SEWCDDVDVDF-----                               | 290 |
| AmelOr117 | -----QLLLWCWPGEILIQESQEIGHVYILN---IPWYNLPPIIY-----            | 351 |
| AmelOr120 | -----QLLLFCFPDILIRQSFNISIAAYS---MQWYQLPTFI-----               | 352 |
| BmorOr7   | -----ELFLYCYGNEVSTESDRLVTSIYS---MEWVGARLG-----                | 341 |
| AgamOr6   | -----ESRVEAFAFKTHQSLGVIDAAYG---CEWYREGSVA-----                | 353 |
| DmelOr45a | -----LSSYCYGGEYIKQQSLAIAQAVYG---QINWPEMTPKK-----              | 330 |
| DmelOr67d | -----LYTFCGLGTLVENSNEFLSVIYTN---CLWYELPVKE-----               | 342 |
| DmelOr83c | -----AYSMSIYICLGTILEFAYDQVYESICN---VTWYELSGEQ-----            | 349 |
| AmelOr162 | -----DLLFVSWTGQQLSNSTERIFEYTTN---GKWYQSSISC-----              | 320 |
| HvirOr3   | -----AYVYCYLGNELIIQSQGIALAAYES---TWTSWPVDL-----               | 220 |
| TcasOr20  | -----LFVVCYYGQKILDESLAIAADAVYT---FLWYKKSIVIV-----             | 337 |
| AgamOr11  | -----LFLYWHANEIHACADRLSMSAYK---SDWYRYDRGT-----                | 375 |
| DmelOr56a | -----ILWIYHWHATLIVECHDELDELAYFS---CGWYNFEMP-----              | 369 |
| AgamOr28  | -----QLFLFCWYAQQITEEARLVSDHIYN---IPWYLADPKL-----              | 370 |
| AgamOr58  | -----MLNFYGLCDLLKIQVHAIKFRLYS---SQWTDYLRPVSQ-PLYP             | 343 |
| AgamOr59  | -----FIFCQLVEKQLDMNRSIGDRLYG---TEWMLKLQYSRDFQR--              | 362 |
| DmelOr1a  | -----LCIYLFGAEQVRLAERFSRLLYEV---IPWQNLPPKH-----               | 339 |
| DmelOr13a | -----QLYVLCENGDALIKQSTLTAQILYECQWEGSDRIEIQSFTP----            | 357 |
| AmelOr161 | -----ELFMFSFSGNGLIDESEGIGESAYN---SGWIGSRFCR-----              | 337 |
| AmelOr141 | -----LCNWPADLLLSKSIDISRATYS---MPWYGYSYN-----                  | 380 |
| AgamOr52  | -----WYVCKLVEDLQATNKRIGWTLYNDKWSDWLQYGREQP-----A              | 330 |
| AgamOr36  | -----CYWCCQLVDRLEVNVTQIGILLYS---LDWPVELQYTKATASR-             | 352 |
| AgamOr25  | -----CFSGNLLLIESDSLSSCVYS---IDWHTMPVPE-----                   | 313 |
| AgamOr45  | -----QLFVICMLGNVLYIIVSDRLKDSVYG---IRWYRCTVSQ-----             | 339 |
| TcasOr3   | -----LMYCWFGNRITEASLKISYALYES---DWFPTSLS-----                 | 360 |
| DmelOr88a | -----TFEICLRGTQLEKASEGLESSLRS---QEWYLGSRRY-----               | 354 |
| AgamOr22  | -----KIWLFYCYGELVSVKAGEVNTGVYAN---QWYRLWNRR-----              | 338 |
| DmelOr49a | -----FYVVSHTGQMLIDLSTNLAKAAFES---KWYEGSLRY-----               | 346 |
| DmelOr85f | -----VYLVCYYGQQLDLSGGEVAHAVYN---HDFHDASIAY-----               | 343 |
| AmelOr119 | -----QLFYICWLGNELGYASSTLDKNQWFS---GWCNERLTG-----              | 364 |
| DmelOr63a | -----YQIVVYCYNGQRFATASEEIANAFYQ---VRWYGESRE-----              | 369 |
| DmelOr67b | -----LEITLYNVSQAQKVESQSELLFHDWYN---CSWYNESRE-----             | 370 |
| BmorOr21  | -----CRYAANLKCMAAETPTLIYC---CGWESVSDLR-----                   | 343 |
| BmorOr11  | -----HFVMPCYYSNLLMERSENFRFAIYS---CGWENHHDKN-----              | 348 |
| BmorOr12  | -----LMAFFMWTAGDINQASQLPDAIYG---SGWYNCRGKSS-----              | 353 |
| AgamOr33  | -----QVFVWSFFGNRVTNMSTGISDATIS---CNWIVLADG-----               | 323 |
| HvirOr1   | EAAAYFLFSLVYLLSRSAVSLIASQVNSASSVPAPVLYDVPSPVYCVQVFLDQVNGD     | 399 |
| HvirOr5   | -----RVISVLAASSVNTHSKLALNHLYN---YETHCYN-----                  | 281 |
| TcasOr1   | -----RICTLHHHLSKLVTRFNEIFGLGLLLMMFGVSFLITQT-----              | 305 |
| TcasOr2   | -----TYGIDTVAVCDACYS-----                                     | 305 |
|           |                                                               |     |
| TcasOr16  | ----KTFVQIVCQQCQKAMISGAK----FFTISLDFASVLGAVVTYFMVLVQLK---     | 475 |
| AmelOr2   | ----KTFVQIVCQQCQKAMISGAK----FFTISLDFASVLGAMVTYFMVLVQLK---     | 478 |
| AgamOr7   | ----KTFVQIVCQQCQKAMTISGAK----FFTISLDFASVLGAVVTYFMVLVQLK---    | 478 |
| AaegOr7   | ----KTFVQIVCQQCQKAMTISGAK----FFTISLDFASVLGAVVTYFMVLVQLK---    | 462 |
| DmelOr83b | ----KTFVQIVCQQCQKAMISGAK----FFTISLDFASVLGAVVTYFMVLVQLK---     | 486 |
| BmorOr2   | ----KTFVQIVCQQCQKAMTISGAK----FFNVSLDLFASVLGAVVTYFMVLIQLK---   | 472 |
| BmorOr2a  | ----KTFVQIVCQQCQKAMTISGAK----FFNVSLDLFASVLGAVVTYFMVLIQLK---   | 472 |
| HvirOr2   | ----KTFVQIVCQQCQKAMISGAK----FFTISLDFASVLGAVVTYFMVLVQLK---     | 472 |
| AgamOr56  | ----QKDMCFLMMRANKPVKLTAAK----LFVVTRDSFTQVIKQAYTIFFTLMSQFLDNP  | 398 |
| AgamOr57  | ----QKDMCFLMMRANKPVKLTAAK----LFVVTRDSFTQVIKQAYTIFALMSQVLDDT   | 398 |
| AgamOr26  | ----QKDLFSVLMRAKPVRLTAAK----LFVVTRDSFTQVMKQAYTIFALMSQFLDDI    | 398 |
| AgamOr27  | ----QKDMCFLMMRANKPVKLTAAK----LFVVTRDSFTQVIKQAYTIFFTLMSQFLDNP  | 398 |
| HvirOr9   | ----RKGFIVIIIRAQKPCELTANG----FFKINLSAFTSILSTSWSYFALLKTMHYHPE  | 401 |
| HvirOr7   | ----GKQILFVQTRAQEPCKLTAAK----FADVNLNFMVRLSSAWSYFALLQTVYGGK    | 385 |
| DmelOr85b | ----KRALVII IARSQKVTFLKATI----FLDITRSTMTDLLQISYKFFALLRMTMYTQ- | 390 |
| DmelOr85c | ----RRALVFFIARPQRTTYLKATI----FMNITRATMTDLLQVSYKFFALLRMTMYIK-  | 389 |
| DmelOr85d | ----RKMLLIIKRAQQPSRLKATM----FLNISLVTVDLLQVSYKFFALLRMTMYVN-    | 412 |
| DmelOr67a | ----KKILIFISMRSQKPVCLKATV----VLDLSMPTMSIFLGMSYKFFCAVRMTMYQ--  | 407 |
| DmelOr67c | ----CTMLKLLIMRSQKPAISIRPPT----FPPISLVTYMKVISMSYQFFALLRMTYSNN  | 404 |

Dme1Or92a -----KRILQFIIARSQKPASIRPPT----FPPISFNTFMKVISMSYQFFALLRRTTYG- 408  
Dme1Or69a -----RRMLLILMMRATKPYMWKTYK----LAPVSIITTYMATLKFYSYQMFCTVRSK--- 393  
Dme1Or69b -----RRMLLILMMRATKPYMWKTYK----LAPVSIITTYMATLKFYSYQMFCTVRSK--- 393  
TcasOr11 -----KKQIARLLNGSQ--RFWDLGQ----FGARYGNSFGKTHKYLKSFLLYKVMLTFT 373  
TcasOr11 -----KI IAMIRGQRA--AKLTLGG----FGDLDESFNLVVKNAFSFFTFVNAMNQK- 332  
AgamOr41 -----KQIFRLLLLSSQQPQTLTLCAG----MTCISLNLFVNMSQKFYSIFMMLRNM---- 382  
AgamOr42 -----QGMFKYVLKSAQPKQLTCGR----FAVINMNLFLAIHKKIYSFFMMLQNM---- 387  
AgamOr43 -----KKDFLIMFHKCQHAKEMTVAS----MAPLNIVLFIAIMQKIYALAMMMRFSE-- 386  
AgamOr44 -----KKDFLIMFHKSQHAMEMVAS----MAPLNIVLFIAIMQKIYAYAMMLMNFFE-- 386  
AgamOr66 -----QKQFKFMLARSQLSAEIMIRS----VGPMMNETFTDIMQKMYSAFAMMYSFLVDL 392  
AgamOr67 -----QKQFKFMLARSQLSAEIMIRS----VGPMMNETFTDIMQKMYSAFAMMYSFLVDL 392  
AgamOr72 -----QKEFRFLMSRQQCPMILTAYG----FHPMNFAYMSVLKLVLYQFFVMIMQYIDRN 388  
AgamOr73 -----QKEFRFLMSRQQCPMILTAYG----FHPMNFAYMSVLKLVLYQFFVMILQYIGRN 388  
AgamOr71 -----QKEFRFLMSRQQYPMMLTAYG----FHPMNFAYMSVLKRLYQFFVMLMQYVG-- 386  
AgamOr74 -----QKDFRFLMSRQQNPMLTAYG----FHPMNFAYMSVLKRLYQFFVMIMQYVG-- 386  
AgamOr70 -----QKEFRFLMSRQQCPMMLTAYG----FHPMNFAYMSVLKRLYQFFVMVMQYVG-- 386  
AgamOr69 -----QKEFAFLMCRQRPMLTAYG----FLTMNFESYMSVLKGLYQFFVMIMQYVE-- 390  
TcasOr9 -----QRTFHVQMRASKIVNVKAGN----YFTMSASSYITFMKSLGIVYSALEGVN-- 294  
TcasOr18 -----QKMLILVQMRVKRMVSTKAGN----FFTMIAPSFIAFQRAVFSYITLLKEVTDLG 408  
Dme1Or83a -----RSDYMFMLNSRRQFQLTAGK----ISNLNVDRFRGTITTAFSFLTLLQKMDARE 453  
Dme1Or85e -----RQDILIFLVNSRRRAHVHTAGK----FYVMDVNRRLRSVITQAFSFLTLLQKLAACK 462  
TcasOr24 -----MSYSILTLIQ----- 343  
TcasOr25 -----RKDLILILRAQKALFVSTGP----FNVLSFALFVSLKTSFIWPPKNEEMTPSRW 384  
TcasOr19 -----RNKLILMIQRSQKPLFLATGA----FNIMSFALFVTV----- 331  
TcasOr22 -----QKMLLLLLLVRSQKAFNLHATP----VGIMSFALFVALLKTSYSYFTLLHQST-- 382  
TcasOr23 -----KKVLLLLLVRSQKAFNLQATP----IGIMSFDL----- 360  
AmelOr168 -----QRVILMISLANELKCKISNFQ----NIDLTLPSFMSILNQAYSICLLFLKTKQD- 390  
AmelOr170 -----QRVILMISLANELKCKISNFQ----NIDLTLPTFMSILNQAYSICLLFLKTKQD- 397  
AmelOr169 -----QHIIILMITLANKLCKLSSFR----NIDLTLPSFMSILNQAYSICLLFLKTKQD- 403  
Dme1Or65b -----VYRDLCVIIRRGDPLIMRASP----FPSFNILINYSAILNQCYGILTFLLKTLTD-- 385  
Dme1Or65c -----VYRDLCLVIRRGQEPILIMRASP----FPSFNINYSAILNQCYGILTFLLKTLTD-- 385  
Dme1Or65a -----IHRQFCFFIQRAQKPLIMKASP----FPPFNLENYMFILKQCYSLTILANTLE-- 417  
TcasOr17 ----- 343  
TcasOr21 ----- 343  
TcasOr56 -----PKKTLLLLMMRAQRPCYFTAGK----FSLLSLQTFMTIVRGAGSYFMFLRQMNI-- 433  
TcasOr15 ----- 340  
AgamOr9 -----TRKLLIAFQQITARGIKCSAKYI-F-TIELSMQTFVTI IKTSYSYLAVLRSMTD-- 418  
AgamOr65 -----CRKLLIAFQQITAVGIKCSAKYV-F-TIQLSMETFVTILKTSYSYLAVLRSMTD-- 421  
BmorOr6 -----FKRNLCIAMECMAKSLTFRAG--S-YIPLSRAMFVSILRSSYSYFAFLNQANEQY 391  
BmorOr10 -----FRKVLITMERMKRPIFKAG--H-YIPLSRPTFVAILRCSYSYFAVLRNRVNE- 387  
AgamOr34 -----NRKSVQMFLVTRTNKPFVAAFG----YFNFNLPFAFTTILNMAYSVYCVLQRKAKNV 380  
AgamOr37 -----ERKTLRMLLQRMNKPILTKAFY----FFNYNLQAFSTTILNMAYSYALLQRNALKK 392  
Dme1Or94a -----IRKLLNAYMEHLKPKVTRAGN----FFAVGLPIFVKTIINAYSFLALLLNVSNN-- 387  
Dme1Or94b -----TRKLLNCYMEFLKRPVKVRAGV----FFEIGLPIFVKTIINAYSFLALLLNISK-- 383  
Dme1Or71a -----MRRLVLMFMVYLNRPVTLKAGG----FFHIGLPLFTKTMNQAYSLLALLLNMQ-- 378  
Dme1Or46a -----SRRIALLFMQRLHSTLRIRTLN---PSLGFDLMLFSSIVNCSYSYFALLKRVNS-- 381  
Dme1Or46b -----NRRIVLLMMQRFNSPMLLSTFN---PTFAFSLEAFGSIVNCSYSYFALLKRVNS-- 384  
HvirOr8 -----FKSSMRFIFIERAHKPLSITGGK----MFCLSLVTFSTSIMNTAYSFFTLQNVKSRK 397  
BmorOr8 -----FKRSIIFVERAKIPITITGLK----MFPLSLATFTSIMKTAYSFFTLIRNQALQ 394  
AmelOr68 -----SKKDLINIMRRAMNPIELTCAY----FTIDLRTFVTILKMSYSTYFNLQRTKVN- 375  
AmelOr69 -----TKRDLIMIMMRASYPIEMTSVH----VITMNLDSFVILKTSYSAYNLLQSNRE-- 369  
AmelOr70 -----TKKIFLIIMTRATQPFEFTSGY----LVTNLNEFFVALIKASYSVFNLQRTK-- 370  
AmelOr71 -----VQRAILLVMRRSMKPIEFTSIY----IVSVNLDSFMTLLKSSYSYFALLKRVNS-- 371  
AmelOr72 -----AKKILLIIMARSLTPVEVSAH----IIPNLLESFKRLIKATYSAYNMLQQTG-- 370  
Dme1Or19a -----FRLLLLMLARCQIPMILVSGV----IVPISMKTFTVMIKGAYTMLTLLNEIRKTS 385  
Dme1Or19b -----FRLLLLMLARCQIPMILVSGV----IVPISMKTFTVMIKGAYTMLTLLNEIRKTS 385  
Dme1Or33a -----YNRSLIILMQLTLVPVNIKAGG----IVGIDMSAFFATVRMAYSFYTLALSFRV-- 378  
Dme1Or33b -----YSRILLIFMQLTLAEVQIKAGG----MIGIGMNAFFATVRLAYSFFTLAMSLR-- 379  
Dme1Or22a -----YKSTLVYFLHNLQQPITLTAGG----VFPISMQTNLAMVKLAFSVVTVIKQFNLAE 394  
Dme1Or22b -----YKSTLVYFLHNLQQPILLTAGG----VFPISMQTNLMVKLAFVTVIVIKQFNLAE 394  
Dme1Or42b -----YKTLLYFLQNVQQPIVFIAGG----IFQISMSSNISVAKFAFSVITITKQMNIA 394  
Dme1Or59b -----YKATLVLFMHVHQQPIIFIAGG----IFPISMNSNITVAKFAFSIITIVRQMNLA 395  
Dme1Or59c -----YKSAVLYFLHRAQQPIQFTAGS----IFPISVQSNIAVAKFAFTIITIVNQMNLGE 398  
Dme1Or98a -----YKSSLRVYFLKNAQKSIQFTAGS----IFPISVQSNIAVAKFAFSVITIVRQMNIA 392  
Dme1Or42a -----YQKTLMYFLQKQQPITFMAMN----VFPISVGTNISVTKFSFSVFTLVKQMNISE 397  
Dme1Or85a -----YRTTMLYFIHNVQQSILFTAGG----IFPICLNTNIKMAKFAFSVTVIVNEMDLAE 392  
Dme1Or43b -----YQRTVIQFLQKQQPMTFTAMN----IFNINLATNINVAKFAFTVYAIASGMNLDQ 397  
AgamOr2 -----IRKRLILIIARAQRPMVIVKGN---VYP-MTLEMFQKLLNVSSYSYFTLLRRVYN-- 378  
AgamOr10 -----IKKLLMMTIRAQRPLEITVGN---VYP-MTLEMFQKLLNASYSYFTLLRRVYN-- 375  
Dme1Or30a -----TQKTLKFLIMRSQKPLAILVGG---TYP-MNLKMLQSLNNAIYSFFTLLRRVYG-- 377

Dme1Or49b ----LRKNILFMMRAQRPAAILLGN---IRP-ITLELFQNLNLTYYTFFTVLKRVIY-- 375  
Dme1Or43a ----FRKTLILIFLMQTHPMEIRVGN---VYP-MTLAMFQSLNNASYSYFTMLRGVTK- 376  
AgamOr32 ----KLVYICLMRAQKPVIMKSGF---IEA--SLPTLKKILSSSASYITMLMSLEAD 379  
AgamOr35 ----QKRLRLCIMRAQKPIVTKGGF---IKA--TLPTLKKILNSTGSIYITMLLSLEAQ 389  
Dme1Or47a ASTSICRSLILISMRAHRGFRITGYF---FEA--NMEAFSSIVRTAMSYYITMLRSFS--- 385  
Dme1Or98b --LQLVSSLKIAMMRSSLCGCPIDGYF---FEA--NRETITIVRTAISYVTLRLSLA--- 382  
Dme1Or9a ----KRALLIAAMRAQRPCQMKGYF---FEA--SMATFSTIVRSVASYIMMLRSFNA-- 392  
AgamOr38 ----RHLVQMMVRAKYGCNVDVPF---FRT--SMATFSVIVRSAMSYYITMLKSFL--- 407  
AgamOr39 ----RHLIQMMMIRAQYGSNVDVPF---FET--SMASFSAIVRTASSYITMLKSFL--- 408  
Dme1Or24a ----QKMTLLMVARAQRVLTIKIPF---FSP--SLETLSILRFTGSLIALAKSVI--- 387  
Dme1Or45b ----RRRVFLIILRAQRPIVTRVPF---FAP--SLPVFTSVIKFTGSIVALAKTIL--- 396  
AmelOr74 TGRMLRKDIRIIMMKSMPRCYLSRSG---FFP-MSLETSTA----- 382  
AmelOr86 AGRMLREDVKVMIMKSMRPCHLSAGG---FFP-VSLETSTALMSSTLSYFTMLRESSKDK 400  
AmelOr75 AGILVRKNLIIIVIMRSQKICCLTAGK---FFP-VSLETSTAVLSTAISYFTLLKQSSLEN 400  
AmelOr84 VGRVVRKNLIIIVVARSHRVCCLTAGK---FFP-VSLETSTAVLSTAMSYYFTLLR----- 391  
AmelOr87 IGRTLRRDLRMVIIIRSRKPCCLTASR---FFP-VSLETCTTVLSTAMSYYFTMLRQSFAN- 424  
AmelOr76 YGKMIRKDLIVIMRSKSPCYLTALG---FFA-VSLETYTKVLSTAISYFTLLKRYEKEF 403  
AmelOr85 YGKMIRKDLIVIMRSKSPCYLTALG---FFP-VSLETYISILSTAISYFTLLRNRAEQT 408  
AmelOr88 YGKSLRKDLTFVIMRSRSPCCLTAGC---FFP-VSLETYTGILSVAVSWFTSLKKYEKKL 406  
AmelOr91 SGRMMRKDLIIIVIMRASIPCCLSGKG---YFI-VSLETYTSVLSTAASYFTLLRNNIESD 407  
AmelOr92 SGRMMRKDLIVVIMRASIPCCLSGKG---YFI-VSLETYTSVLSTAASYFTLLRNNIESE 404  
AmelOr95 SGRMMKDLIVIMRSGTPCCLTGRG---FFV-VSLETYTNVLSTAASYFTLLKQHSEAH 403  
AmelOr93 SRRMIRKDLIVIMRSNVPCLTGRG---FFI-VSLEMYX-VLSTAAX-FTLLKQRTEAT 379  
AmelOr77 -----  
AmelOr94 FGKMIKDLQFIVVRSRRACCLTGCG---FFD-ISLETYTKIMSTAMSYYFTILKQRIVEV 402  
AmelOr96 FGKMLRQDLQIVVMSRRACCLTAGC---FFP-ISLETYTKIMSTTMSYFTLLKQRTVDT 402  
AmelOr79 FGRMLRKDLIMVIKRSRRVCCLTANG---FFP-VSLETYTKILSTAVSYFTLLNRIENA 402  
AmelOr83 FGRMLRNDLIMVIKRSRRVCCLTANG---FFP-VSLETYTKILSTAVSYFTLLNRRVENA 407  
AmelOr80 FGKILRKDLIIIVIRRSRRVCCLTANG---FFP-VSLETYTKILSTALSYYFTLLSNRIENS 405  
AmelOr81 FGKIFRKDLMIIVIRRSRRVCCLTANG---FFP-VSLETYTKILSTALSYYFTLLSNRIENA 402  
AmelOr82 FGRMLRKDLIMVITRSRRVCCLTANG---FFP-VSLESYTKILSTALSYYFTLLSNRVETA 404  
AmelOr78 FGRMLRKDLIMVIMRSRRVCCLTANR---FFP-ISLETYTKILSTAVSYFTLLSKHVDNS 404  
AmelOr89 FGKMLRNDLIMVIKRSRRVCCLTANG---FFP-VSLETYTTILSTAVSYFTLLRNNEKA 401  
AmelOr90 FGRMLRNDLIMVIERSRRVCCLTANG---FFP-VSLETYTTILSTAVSYFTLLRNNMEND 402  
AmelOr142 ----TQRKILFIIILRSQKYESFGING---IVPALSLSYGYLYTSLSYFNALRIMVEDT 373  
AmelOr146 ----LQKFVLFATIP-QTPVILKVR---IIPAFSLNYYCSFITNVLSMFTALRVLMYKD 372  
AmelOr148 ----MQKDLLIILMY-QRPVILSINV---LPELTLRYCYSVVANAFSVFTALRAVVEDK 369  
AmelOr158 ----MQKTLIMMAY-QKPVTFSINV---LPELTLRYCCSYVSNALSIFTALRAVVEVT 370  
AmelOr147 ----MQKLVLTITLIY-QKPVITISINV---VLPTTYF-----ALLLF----- 351  
AmelOr150 ----MQKDVLTVLMY-QQPIILSINC---ILPELTLHYCYC----- 353  
AmelOr151 ----MQKDVLNIVLY-QQPIIFSVNC---ILPELSLRYCYCYLSNAFSIFTAIRVMIEDD 372  
AmelOr152 ----MQKNLLNIVLY-QQPIILSINC---ILPELSLRYCYCYLSNAFSIFTAIRVVIENN 372  
AmelOr154 ----MQKNFLNIVLY-QKPVIFISISC---IVPELSLRYCYCYLSNVFSIFTTLRVLLEDT 372  
AmelOr155 ----MRKYLLNIVLY-QKPVIFISISC---IVPELTLRYCYC----- 353  
AmelOr157 ----LQKALLTVLAF-QKPIAVSINV---LPELTIIRYCYSVSNALSIFAALRTVVE-- 367  
AmelOr156 ----MQQNILIMLIF-QKPIISLSINF---LMPKLSLRSYCAVLSNAFSIFTALRVILKDN 372  
AmelOr153 ----MQKNLLKXLI-F-QRPVIXIYRLZ---LLSKLILRYCYCLYLSNVFSIFTALHVLLEDNI 348  
AmelOr144 ----MKSCVIFMMIRSQKFLFIRMSS---LLPPLSLEYCSNFVTTVSSYFAMRMTMIES- 373  
AmelOr145 ----MKSCVIFMMIRSQKFLFIRMSS---LLPPLSLEYCSNFVTTISSYFAMRMTMIES- 374  
AmelOr143 ----MKSCVIFMMIRSQKFLFIRMSS---LLPPLSLEYCSNFITTVSSYFAMRMTMIES- 368  
AmelOr1 ----VAKNIKTIIILRASRPSLSGAK---ILE-LSLQAFCDVCKTSAAYFNFLRAMTV-- 400  
AmelOr3 ----IAKNIRIIILRASRPSLSGAK---MLD-LSLRVFCDFVKTSAAYLNFLRTMTV-- 403  
AmelOr6 ----KARCLILIIIMSNIYPVKLTAAK---VVD-VSLTTFDVMKAAMGYLNMLREVI--- 394  
AmelOr7 ----KARCLILIIIMSNIYPVKLTAAK---VVD-VSLTTFDVMKAAMGYLNMLREVT--- 394  
AmelOr4 ----KARYLILMIIMSNIYPVKLTAAK---VVD-VSLTTFDVMKAAMGYLNMLREVI--- 396  
AmelOr5 ----KARCLILMIIMSNIYPVKLTAAK---VVD-VSLTTFDVMKAAMGYLNMLREVI--- 396  
AmelOr8 ----KARSLILLIIMSNIYPVKLTAGR---LVD-VSLVTFTSIKSAVGYMNIQQVTT--- 396  
AmelOr9 ----KARSLILLIIMSNIYPVKLTAGR---IVD-VSLVTFTSIKSAVGYMNIQQVTT--- 396  
AmelOr11 ----KARSLILLIILSHYPIKVTAGR---IMD-LSLVTFTSIKSAVGYMNIQQVTT--- 394  
AmelOr12 ----KARSLILLIILSNYPIKVTAGR---IVD-VSLVTFTSIKNSVGYMNIQQVTT--- 396  
AmelOr10 ----KSRSLILLIISNIYPVKVTAGK---IID-LSLVTFITIIKTAVSYMNIQQVTT--- 395  
AmelOr14 ----EARNLILVIMSSYPVKLTAGK---VVD-ISLATFTDIKTTVGYLNMLQKVT--- 398  
AmelOr15 ----EARNLILVIMSSYPVKLTAGK---VVD-ISLSTYTDIKATVGYLNMLRKVTT--- 399  
AmelOr13 ----EARGLILVIMSSYPVKLTAGK---IVD-ISLITFTDIVKTSVGYLNMLRTVA--- 390  
AmelOr16 ----NMRCLILIIAMSNIYPVKLKA---MME-MSLTTFDVMKMSMGYLNMLREVI--- 401  
AmelOr17 ----NMRCLILIIAMSNIYPVKLKA---MME-MSLTTFDVMKMSMGYLNMLREVI--- 401  
AmelOr18 ----KSLAIPLMISMSHSTTKITAGN---IIE-LSISSFGDVIKTSVAYLNMLRTFTT--- 411  
AmelOr19 ----KSLAISLIIISIRSTTKITAGN---IIE-LSISSFGAIIKTSFAYLNMLRTFTT--- 411  
AmelOr22 ----KKLCFVLIIAMSNSSIKLTAGN---MVE-LCLTTFSDIVKTAVAFNLVLRTLTI--- 412  
AmelOr24 ----KKLCFVLIIAMSNSSIKLTAGN---MVE-LCLTTFSDIVKTAVAFNLVLRTLTI--- 403

AmelOr20 ----KKLFCILIIAMSNSSIKLTAGN---IVN-LSISTFTDVKTAVTYLNVLQKTT--- 407  
AmelOr25 ----KKLCCILIIAMSNSSVKFTAGN---MVE-LSIYTFSDVVKTSVAFNLNMFRAALT--- 402  
AmelOr29 ----KKLCCVLI IAMSNSSIKFTAGN---MVE-LSIYTFSDVVKTSVAFNLNMLRALT--- 403  
AmelOr30 ----KKLCCVLI IAMSNSSIKFTAGN---MVE-LSIYTFSDVVKTSVAFNLNMLRALT--- 403  
AmelOr21 ----KKLCCVLI IAMSNSSMKLTAGN---LIE-LSMSTFSDVVKTSVAFNLNLRTLT--- 403  
AmelOr23 ----KKLCCVLI IAMSNSSKLTAGN---LIE-LSMSTFSDVIKTSVAFNLNLRTLT--- 403  
AmelOr35 ----KALSLLIISAANSSTKLTAGK---LVE-LSLSSFCVSVLKSSLAYLSLLRSLT--- 413  
AmelOr27 ----TILNLIILRSTVVVQITAGK---LFN-MSIYTFGDVLTAFAYLNLLRQMT--- 405  
AmelOr28 ----TILDLTIIARSSVVVQITAGK---LIH-MSIQTFDVIKTFAYLNLLRQVT--- 405  
AmelOr33 ----DILDLIQIILRSSMVIKITAGK---LVH-MSIYTFGNVMKTAFTYLNLLRQLT--- 407  
AmelOr34 ----DILNLIQIILRSSMVIKITAGK---LVH-MSIYTFGNVMKTAFTYLNLLRQMT--- 407  
AmelOr32 ----DILNLVQIILRSSMVIKITAGK---LVH-MSIYTFGNVMKTAFTYLNLLRQMT--- 407  
AmelOr31 ----DILDLIISRSNAVIKITAGK---LTN-MSIYTFGNVMKTTFTYFNLLRHVT--- 406  
AmelOr36 ----DILNLIIMITRSSVEYKMTAGK---IID-MSVITFGNIKTVFGYLNILRQVTML- 405  
AmelOr37 ----DILNLIIMITRSSVEYKMTAGK---IID-MSVITFGNIKTVFGYLNILRQVTML- 406  
AmelOr38 ----DILNLIIMITRSSVEYKMTAGK---IID-MSVITFGNIKTVFGYLNILRQVTML- 407  
AmelOr39 ----DILNLIIMIVRSSVEYKMTAGK---IMD-MSVITFGNIKTVFGYLNILRQVTML- 407  
AmelOr47 ----DILNLIIMITRSSVEYKMTAGK---IID-ISVITFGNIKTVFAYLNILRQVTIL- 406  
AmelOr48 ----DIFNLIMIVRSSVEYKMTAGK---IID-ISVITFGNIVKTVFVYLNILRQVTIL- 406  
AmelOr40 ----DILNLIIMITRSSVEYKMTAGK---IID-MSVITFGNIKTVFAYLNILRQVTIL- 406  
AmelOr43 ----DILNLIIMIRSGMEYKMTAGK---IIN-MSVVTFGNIKTVFAYLNILRQVTIL- 407  
AmelOr45 ----DILNLIIMITRCSMEYKMSAGK---MID-MSVITFGNIVKTVFAYLNILRQVTIL- 406  
AmelOr41 ----DILNLIIMIRSSVEYKMTAGK---IID-MSVITFSNIKTVFAYLNILRQVTIL- 406  
AmelOr42 ----DILNLIIMIRSSVEYKMTAGK---IID-MSVITFSNIKTVFAYLNILRQVTIL- 406  
AmelOr44 ----DILNLIIMIRSGVEYKMTAGK---IVN-MSVITFGNIKTVFAYLNILRQVTIL- 406  
AmelOr46 ----DIFNLMMIISRSSISVNMSAGK---LID-MSVLTFGNTVKSIVFVYLNMLRQVTMI- 405  
AmelOr49 ----NILNLMIMITRSSMNIINMTAGK---MTN-MSVLTFGNIVKSIFAYLNILRQVTMI- 406  
AmelOr50 ----DILNLIIMIRSSVEYKMTAGK---IIT-MSIYTFGNIVKTVFAYLNMLRQVTMM- 408  
AmelOr26 ----TALGLVLIISRSSMVIKITAGK---LIQ-LSIATFAAVFKASFAYLNLMIRTIAM-- 410  
AmelOr53 ----EAYDLILLISISQHPKLTAGK---IEE-LSLNTFSTVAKTSVVYLNLLRVTVDW- 412  
AmelOr54 ----EAYDLILLISISQYPPKLTAGK---IEE-LSFNTFSSVAKTSVVYLNLLRVTVDW- 410  
AmelOr52 ----KAHDLILLISISQYPPKLTAGK---IID-LSFNTFSSVVKTSVIYLNLLRVTVD-- 406  
AmelOr51 ----KARDIILLLVISKYPPKLTAGK---IFI-LSMNTFSSVVLKSSVVYLNMLRVTITEL- 409  
AmelOr55 ----TIQNLIILIMAMSNPAKLSVGR---IVD-LSLSTFGNVLKTTFVYLNFLQTAVMQ- 408  
AmelOr57 ----TIQNLIILIMAMSNTPAKLSVGR---ILD-LSLSTFGNVLKTTFVYLNFLQTAVM- 407  
AmelOr56 ----TIQNLIILIMAMSNTPAKLTVGR---IVD-LSLSTFGNVLKTTFVYLNFLQTAVMQ- 408  
AmelOr58 ----TIQGLILMIAMSNPAKLSAAG---IAD-LSLSTFGSVLKTSAFAYLNLRVTIM-- 409  
AmelOr59 ----TIRGLILMIAISSNPTKISAGG---IVD-LSLSTFGNVLKTSAFAYLNFRFTIM-- 410  
AmelOr60 ----TIQGLILIIAISNSPTKISAGG---IVD-LSLFTFANILKTSFVYLNFIIRAAIM-- 410  
AmelOr61 ----TIHDLILIIAMSNNPKISAGS---IVD-LSLYTFGGVLKTSLVYLSFLRFTIM-- 410  
AmelOr63 ----VSHNTFIIIMRAQHPVLLTAGK---FFV-INMETYMSILRISMSYLSVLRVMVNS- 397  
AmelOr64 ----VTQNIIFIIIMRAQHPVLLTAGK---FFV-VNMETYMSILKTSMSYLSVLRVMVNS- 393  
AmelOr66 ----VSNITFIIIMRAQHPVLLTAGK---FFV-VNMETYMSILKTSMSYLSVLRVMVNS- 392  
AmelOr65 ----VSKDIIFIIIMKAQRPVLLTAGK---IFV-VNMETYISILKTSMSYLSVLRVMVNS- 393  
AmelOr67 ----VSKDIIFIIIMKQRPVLLTAGK---FFV-INMETYMSILKTSMSYLSVLRVMVNS- 393  
AmelOr114 ----ITKMLIIVMCRAKSPLTVTAGR---FCS-FTLQLFSEVLKTSMRYSVLVYAVKDKI 373  
AmelOr115 ----RAVLLMIVIRANVSFQITAGK---FSP-FSLEFFNAVLKTSAGYLSVLLAMKDRL 396  
AmelOr118 ----DVRIMLMIILRSQKQLTLTAGK---FIC-LSLEAFANMLKASASYVSVLYARY--- 371  
AmelOr164 ----EIRVLLLLIMRSQKPLTLTIGK---YMK-LSLETANMLKISASYASVLYALE--- 383  
AmelOr163 ----DSRIVLLILIIQAQRKLILSAGN---FVT-LSVQTFASMQKVSASYISILMTIY--- 385  
AmelOr165 -----  
AmelOr166 ----ESRLLIPIILRAQRGFTTFGK---FAT-LSMESFTA----- 358  
AmelOr167 ----NRGVMILLMVRSQRLTITAGK---FMD-LSMQGFAN----- 369  
DmelOr35a ENLRLKLLINLAIEMNSKPFYVTLGK---YFR-VSLQAGLKILQASFSYFTFLTSMQRRQ 406  
DmelOr74a ENVKLMKLVTLAIQLNSRPFITGLN---YFR-VSLTAVLKI IQGAFSYFTFLNSMR--- 404  
AgamOr3 ----MRRKLRLLLQRSQKPLGVTAGK---FRFVNVAQFGKMLKMSYSFVVLKQF--- 408  
AgamOr5 ----IQRKLRMVLQRAQKPVGISAGK---FCFVDIEQFGNMAKTSYSFYIVLKDQF--- 389  
AgamOr13 ----IQKDLQLIIARAQRPVGITAGK---FCYMNMEQLGIIVKTTYSIYIILRDQF--- 388  
AgamOr15 ----IQKDLQLILVRAQSPVGITAGK---FYYMNMEQFGIIVKTTYSFFVILRDQI--- 387  
AgamOr17 ----VQKDLQVLIARAQKTVGITAGK---FCYMNMAQLGIIVKTTYSFFVILRDQI--- 387  
AgamOr16 ----LRKDLQLIIMLRAQRSVGITAGK---FCFMNMEQFGEVVKTTYSFFVILRDQF--- 385  
AgamOr55 ----IAKHLQLILLRAQKPIGITAGK---FCFINMEQFVAKLLKTTYSVFVILRDLL--- 388  
AgamOr18 ----MRKHI SFMIMRSQRVGLTAAK---FCFVDMEQFGAMLNMSYSFFVILKDAF--- 395  
AgamOr14 ----IQQGLRMVLRHTQSPVGIQAGK---FCFVDVELFQNMVNKSYSCFIVLKDAL--- 409  
AgamOr51 ----IQQRLRMVLRHTQSPVGIQAGK---FCFVDMELFQKMNKSYSCFIVLKDAL--- 397  
AgamOr12 ----IQKTVAMVIARGQARLRITAWG---IIPIDLELFAKVVKASYTVLLVVKDFI--- 398  
AgamOr19 ----IQKTVAMVIARGQARLRITAWG---IIPIDLELFAKVVKASYTVLLVVKDFI--- 398  
AgamOr20 ----IQKMISTIVARSQPLRITACG---FITVNVLELFAKVVKTTYSGFIVLKDFI--- 398  
AgamOr21 ----VQKMVAMIIARSQPLQITACG---FIPINLELFTKVVKHSYTVLAVLKDLI--- 395  
AgamOr50 ----VQKMVAMIIARGQAPLQIKACG---FIPINLELFAKVVKTSYSVLIIVLRDFV--- 397

AgamOr29 ----IQKQLLFMIRRSQKPIILSAGK----IFYANVLQFSEMVOQSYSFYLVLVKNVF--- 386  
AgamOr53 ----IQRQILLMIRRSQTPLILRAGK----LFSANVVQFGDIVQKSYSFFLVLVKNVF--- 376  
AgamOr30 ----IQKQIYFMIHRSQTRIELTAGK----LFPVNI AQFSEIVKKSYSYLLVKDIF--- 387  
AgamOr46 ----LQKMVVP I IQSSQQRIGITAAK----FYYIDYNRYGQSLKTAYSFYLLKLDIF--- 387  
AgamOr47 ----LQKMVVP I IQSSQQRIGITAAK----FYYIDYNRYGQSLKTAYSFYLLKLDIF--- 387  
AgamOr48 ----IRKYFLRIILQAHRKATITAGK----FYNVNI VTF AQLIKTSYTYMIMKEMF--- 397  
AgamOr49 ----LQKQFQQMIRHAYIPRGITVVGK----FHFVDMASFGQLLKAIFSYYLILKELF--- 404  
AgamOr61 QYVTVRHTLMLVIGRSQKGFQCSYGG----LGSISMERFAQLMQKSYSLLTILLQFAK-- 419  
AgamOr62 QYFSVRRTILLVILQSQSLRFSYGA----HGEISMHSFAELMQKSYSMLTFMLQFQN-- 416  
AgamOr63 QYRHVRRLLLLTAQSDQTIQFSFAG----IGEISMNSFAQLLEKSYSMLTFLLQFAK-- 412  
AgamOr60 AYRQMRASFLIIIRSQKPLSFSISA----AGTISMARFADLLNSSYSMLTMVFMQLKERI 415  
AgamOr75 -GRTIKRPMMLMIMQANMTKDFSAGG----LTTVSAELFAKTCRMIYTMMMFMANMAT-- 411  
AgamOr76 -GRTIKRPMMLMIMQANMTKDFSAGG----LTTVSAELFAKTCRMIYTMMMFMANMAT-- 411  
AgamOr78 -GRTIKRPMMLMIMQANMTKDFSAGG----LTTVSAELFAKTCRMIYTMMMFMANMAT-- 412  
AgamOr77 ----SKPFLITIRMAQVPLRFMCGR----MYQLSTELFTSVVQFIYSLIMMLLQFK--- 386  
AgamOr79 ----SRPFLITIRMAQVPLRFMCGG----MYQLSTELFASVVQFIYSLIMMLLQFK--- 384  
AmelOr99 ----IQKMLYMMQIRSKKLCALTAGG----LYDMNIENFGITFKTCMSYFTMIMSFK--- 404  
AmelOr101 ----IQKMLYMMQIRSKKLCALTAGG----LYDMNIENFGITFKTCMSYFTMIMSFK--- 404  
AmelOr102 ----IQKVLVIMQIRSKKCLTSLAGG----LYEMNIENFGITFKTCMSYFTMIMSFK--- 403  
AmelOr103 ----IQKVLVIMQIRSKKCLTSLAGG----LYEMNIENFGITFKTCMSYFTMIMSFK--- 403  
AmelOr104 ----IQKVLHMMQIRSKKPCSLTAGG----LYEMNMENFGITFKTCMSYFTMMLMSLKK-- 405  
AmelOr98 ----IQKMFNIMLMRSKSKCALTVYG----LYELNMENFGITFKACISYFTMMLSLK--- 401  
AmelOr100 ----VQKMFVVMQIRCKKPCSLTAGG----LYEMNMENFGTALKTCMSYITMILSLK--- 324  
AmelOr97 ----VQKIFHIIQIKSSKPKCLTAGG----LLELNLENFGIALKTCMSYFTIFLSLQD-- 349  
AmelOr105 ----VQKVLHIMQIRSNKPCILTAAG----LYEMKIESFGITIKTCMSYFMMFSLRE-- 405  
AmelOr109 ----MQSLYVVLVRKCLSPKLTGGG----FVALNLDSFVQILKASFSYTVFRS----- 390  
AmelOr110 ----TQSLYVVLVRKCLTFFPKLTGGG----LILNLNLSFVQILKASFSYTVFRS----- 389  
AmelOr111 ----TQSLYVVLVRKCLSPKLTGGG----LVALNLDSFVQILKASFSYTVFRS----- 390  
AmelOr108 ----TQSLYVVLVRKCLNPPKLTGGG----LIVNLNLSFVQILKLSFSYTVFRS----- 390  
AmelOr107 ----TQSLYVVLVRKCLNPPKLTGGG----LIALNLDSFVQILKLSFSYTVFRS----- 391  
AmelOr112 ----IRSLYVLSLRSCNPPKLTAGG----LIVNLNLSFVQILKASFSYTVFRS----- 388  
AmelOr113 ----IQALYILALRRSLTPPRLTAGG----LIELNMQSFSEVIKLSISYTVLRST--- 389  
AmelOr106 ----IQAMFVILRRNLNPPKLTAGG----LMQLNLNTFAQVVKTSVSYFTVLKSV--- 387  
AmelOr122 ----AQKLLLFMILRSMGCEICLSG----LFTPSYAGLTSMMSSSFYSYCAVIYSIQ--- 363  
AmelOr125 ----AQKLLLFMILRSMGCEICLSG----LFTPSYAGLTSMMSSSFYSYCAVIYSIQ--- 362  
AmelOr123 ----AQKLLLFMILRSMGCEICLSG----LFTPSYAGLTSMMSSSFYSYCAVIYSIQ--- 360  
AmelOr126 ----AQKLLLFMILRSMGCEICLSG----LFTPSYAGLTSMMSSSFYSYCAVIYSIQ--- 360  
AmelOr127 ----AQKLLLFMILRSMGCEICLSG----LFTPSYAGLTSMMSSSFYSYCAVIYSIQ--- 360  
AmelOr128 ----AQKLLLMMLRSTVGCCELHLSG----LFTPSYAGFTSMSSSFYSYCAVIYSIQ--- 360  
AmelOr129 ----AQKLLLFMMFKSSVGCCELRLCG----LFTASYAGFTSMSSSFYSYCAVIYSIQ--- 360  
AmelOr133 ----VQKILLLIMIRSSMACIFHICG----VFVPCFAGFTTMLSTSFYFTLMYSIQ--- 265  
AmelOr134 ----IQKILLLIMIRSSMACIFHIFG----VFVPCFAGFTTMLSTSFYFTLMYSIQ--- 361  
AmelOr131 ----VQKILLLIMIRSSMACIFHIFG----VFIPCYVGF TMLSTSFYFTLTIYSIQ--- 363  
AmelOr132 ----VQKILLLIMIRSSMACIFHIFG----VFVPCYTGFTTMLSTSFYFTLTIYSIQ--- 363  
AmelOr135 ----VQKILLLIMIRSSTRCMFHILD----IFTPCYAGFSKMLSTSFYFTLIYSMQ--- 361  
AmelOr136 ----VQKILLLIMIRSSSTACMINILG----VFTPCYIGFSKMLSTSFYFTLMHSIQ--- 363  
AmelOr138 ----VQKILLLIMIRSSSTCTPHILG----VFIPCYTGFSKMLSTSFYFTLTIYSIQ--- 269  
AmelOr130 ----AQKILLLIMLQSTTKHAFNILG----LFTPCYAGFSTMLSSSFYSYFTLMYSIQ--- 363  
AmelOr137 -----  
AmelOr139 ----VZKILLLIMI QSSITYMISILG----VFILCHIGFSTMLNTSFYFTLIXSTQ--- 285  
BmorOr20 ----RKTVAIFLMNVQEPHLVNALG----LAKVGVQSM AAILKTSFYSYFTFLRTVSE-- 439  
BmorOr3 ----RKTVAIFLMNVQEPHLVNALG----LAKVGVQSM AAILKTSFYSYFTFLRTVSE-- 439  
BmorOr18 ----RKTVAIFLMNVQEPHLVNALG----LAKVGVQSM AAILKTSFYSYFTFLRTVSE-- 439  
HvirOr6 ----RKVVMFFLMNVQEPVHVKAMG----LANVGVTTMASILKTSLSYFTFLLSQTKEE 431  
BmorOr23 ----RKMVYMMFRQSQIPLQLKAMN----MLSIGVKTMVSI LKTSVTTYLLILKTVTTD- 417  
BmorOr16 ----RKMVYMMFRQSQIPLQLKAMN----MLSIGVKTMVSI LKTSVTTYLLILKTVTTD- 417  
BmorOr4 ----RKMVYMMFRQSQIPLQLKAMN----MLSIGVKTMVSI LKTSVTTYLLILKTVTTDE 417  
BmorOr5 ----RKMVYMMFRQSQIPLQLKAMN----MLSIGVKTMASILKTSVTTYLLMLKTITANE 418  
BmorOr22 ----RKLQVLLQKSQKPIQFKAMN----MMSVGVQTMAS I IKTSISYFIMLRTIARD- 424  
BmorOr17 ----RKLQVLLQKSQKPIQFKAMN----MMSVGVQTMAS I IKTSISYFIMLRTIARD- 424  
BmorOr1 ----RRVYGFLLRRTQNPVRFKAMG----MLDVGVQTMAS I LKTSISYFVMLRTVAT-- 430  
BmorOr1a ----RRVYGFLLRRTQNPVRFKAMG----MLDVGVQTMAS I LKTSISYFVMLRTVAT-- 430  
BmorOr1b ----RRVYGFLLRRTQNPVRFKAMG----MLDVGVQTMAS I LKTSISYFVMLRTVAT-- 430  
BmorOr19 ----QKIFVVFLQRTQPDLEFETVC----GMKAGVKPAFS I V KSMFSYVMMINSRF--- 407  
BmorOr15 ----QKIFVVFLQRTQPDLEFETVC----GMKAGVKPAFS I V KSMFSYVMMINSRF--- 407  
TcasOr5 ----FTVYVWLWIPMALGFIALTVWY-----FEDILHHVGLQLVIL----- 299  
TcasOr7 ----CEAKLLLR-GKVNPLKFTICG-----FLPLDYCLAYTVS----- 311  
HvirOr4 ----VLPSRLEIFSRQLMLQSVSYAP-MGMCTLHRPLIASVIGAVTTYLVILIQFQRYD 396  
BmorOr13 ----PISIELEMFFRQLVNLKASYAP-LKVCTLTRSLVATILGSI TTYLIVIVQLEIKN 443  
DmelOr10a ----RRLVQLLILRSQRPVSMVPPF----FSPSLATFAAILQTSGSI IALVKSFQ--- 406

|           |                                                              |                                  |     |
|-----------|--------------------------------------------------------------|----------------------------------|-----|
| DmelOr33c | ----FDLLIFTQLTLGNRWIKAGG----                                 | LIELNLNAFFATLKMAYSFLFAVVRAKGI-   | 384 |
| DmelOr7a  | ----FRKMLLYYLHRAQQPITLTAMK----                               | LFPINLATYFSAKFSFSLYTLIKGMNLGE    | 407 |
| DmelOr22c | ----RKVILMILRRSQRAKTIVAFP----                                | FTPSPALRSILSTAGSYITLKLKTF---     | 402 |
| AgamOr1   | ----SQAMLFFLQMTLKDVIHKVGS----                                | VLKVTNLNHTFLLQIMKLSYSYLAVLQSMSE  | 417 |
| AgamOr4   | ----RSSIRMMLRQSQRHAIITVVGK----                               | FFRVNLEEFSTRIVNLSYSAYVVLKDVIKMD  | 394 |
| DmelOr47b | ----IQRDISFVILRAQKPLMYVAEP----                               | FLPFTLGTMYMLVLKNCYRLLALMQESM---  | 412 |
| AmelOr73  | ----VMKDLLLVIAARSKKPKVITSGQ----                              | IFILSTESFMKIMKISYSSFNILKNSTMK-   | 365 |
| AgamOr68  | ----QKEYKLLLLRAQQPSGMSIAG----                                | LTPVNYETYTQIMKMLYQLFALAMNFLK--   | 390 |
| DmelOr59a | ----FKRKMMLFVEQSLKSTAVAGG----                                | MMRIHLDTFSTLKGAYSFLTIIIRMRK--    | 379 |
| DmelOr23a | ----RGHMLILAERTKRMQLLLAGN----                                | LVP IHLSTYVACWKGAYSFFTLMDRDLGLG  | 378 |
| AgamOr31  | ----QKMLINCMMRAKKPVNAKSGFTQASLPTLNAVWVQYILNSAGSYVALLMSLME--  |                                  | 377 |
| DmelOr2a  | ----KRELLFTLARTQRPSLIYAGN----                                | YIALSLETFEQVMRFTYSVFTHLLLRK---   | 397 |
| AmelOr62  | ----ARDLILICRGNSSYHVHTAGK----                                | FVFMNIFTFKEILKSSASYSVLKVMMDT-    | 399 |
| AmelOr121 | ----AKSLIIMARSKKPLYLTAGK----                                 | LPVMTLTFCNILKISLSYISFLLTIL---    | 393 |
| AmelOr140 | ----ONLYKFLARSLIFSKLTAFK----                                 | VTTLSMQTFLLAIQTAMSFTVLLSTT---    | 359 |
| TcasOr12  | ----KQNLFLMTRTQFPKLYASG-----                                 | GKVTQSYLLNLE-----                | 374 |
| AgamOr8   | ----QRSLFVMLRSTTVQKLTALK----                                 | FSIVSLASYSKILSTSFYSFTLLKAMYEPN   | 394 |
| BmorOr9   | ----KKTILTIMIRSHKPKLTAYK----                                 | FSVISYGSFSKIISTSWSYFTLLKMTYTPP   | 380 |
| AgamOr40  | ----RRRLVILMNAQRPVRLTGLK----                                 | LYELNLETYYTVLKAAFSYYTIIKKFR---   | 454 |
| TcasOr63  | ----IRKIVMIFLEKTKKPTIVKAGN----                               | FITLSLATLTQILRSAYSFAVLQRLYKDS    | 383 |
| TcasOr4   | ----VASAEFNLLKGALKTIDFHPKG-----                              | HNTKQLIEAKFENCVNHHKEIVK-----     | 378 |
| TcasOr13  | ----KSLEFFMTYLAECQIRFTAYG----                                | FTKLHRGLLTTITGAVTTYLVILFQFN---   | 405 |
| AgamOr24  | ----MKFMKVMLMMSQKPKMLMAAT----                                | LPLNITAFLLQIHKFIYSLIMMLNTKVG--   | 377 |
| AgamOr54  | ----QKAMRLLLMASQNPGRLSYGF-----                               | TVMRAFFEIFRKTYSIAMMMSYNEEEE      | 366 |
| AgamOr23  | ----QKTLQQILLTSQHPVVLSDGFS-----                              | PIDLFNFVEIYKKIYSYLMVLQKVS---     | 380 |
| AgamOr64  | TLRPLRRSILIVLQOTLRPLRFGYGVS----                              | GSLSMQRFGEFMQQIYSLIMFLAQLN---    | 418 |
| DmelOr82a | ----RTSLSLILQSQKEVLIRAGF-----                                | FVASLANFVGI CRTALS LITLKSIE---   | 384 |
| AmelOr116 | ----FNYALLIIMIRTQIPLIIIVGK----                               | VMELSLQNFLLILRTSYSIFTLLKTFTT--   | 399 |
| AmelOr160 | ----TRSLIFCIARAQKPLYLTAGK----                                | FYVFSLETFAVIVKASMAYSVLKSI---     | 390 |
| TcasOr10  | ----KTARLVIMNKAQSPVKLTIGK----                                | FTGMDLRTFLLV-----                | 330 |
| TcasOr26  | ----QKGVILITIRAQKPVRIYAGP----                                | FSYVSHLLILTVFQTSYSYINLLNASS---   | 338 |
| AmelOr117 | ----QKYLYFMIVRSQQYCRITALT----                                | FQTLSECTLSNVFNSTSVSYFTLLRQMQQ--  | 400 |
| AmelOr120 | ----KDEICMIILRSQRPSFITAGK----                                | LYIMHLENFTAILSTAFSYFMMLQSFNTEA   | 403 |
| BmorOr7   | ----FQRGLLVLLERARRPVRPAAGL----                               | VIPLSLQTFLLKIIKSSYTFYAVLRQTK---  | 390 |
| AgamOr6   | ----FHRSVLQI IHRSQQSVILTAWK----                              | IWPIQMSTFSQILQASWSYFTLLKTVYGN-   | 404 |
| DmelOr45a | ----RRLWQVMIMRAQRPAKIFGFM----                                | FVVDLPLLLWVIRTAGSFLAMLRTFER--    | 378 |
| DmelOr67d | ----EKLIIMMLAKAQKPVVLTAAAD----                               | MAPLSMNTALQLTKGIYSFMMMLNLYG--    | 391 |
| DmelOr83c | ----RKLFGFLLRESQYPHNIQILG----                                | VMSLSVRTALQIVKLIYSVSMMMNRA---    | 397 |
| AmelOr162 | ----RKLLAIMLSKSIAPLRLTACK----                                | LYTLNLESFTTIAKTSVSYTMVLCSLQ---   | 368 |
| HvirOr3   | ----QKDLLIVILAAQRPLKLSAGG----                                | MALLCIQTFSQLYNGYSIFAVLNDAVN--    | 269 |
| TcasOr20  | ----QRYVLLILLRSQKPLTLRACG----                                | VKVMSLATFLGLVLSAYSFTLLKLKLP--    | 386 |
| AgamOr11  | ----NRMLQIFILYSNRPLKMHAF-----                                | ISMSLDTFLLAILRASYSYFTILKQLPTNF   | 425 |
| DmelOr56a | ----LQKMLVFMMMHAQRPMKMRALL----                               | VDLNLRTFIDIGRGAYSFNNLRSSHLY-     | 419 |
| AgamOr28  | ----QKDILTFMVKAQKPVVLTAAAD----                               | FYMVTLQTFQRISSTSYFTLLQTNINQY-    | 420 |
| AgamOr58  | RCRRIRSSILIVMTRAEHELRI SCGS----                              | VYDMSLTTCWAVLQFSYSVFTLLLSFFENE   | 399 |
| AgamOr59  | EYRSAALTIRLLIMRSQHRVRFCTCGS----                              | INPVSMKEKTEFLNLSYSIVMFLLSIN---   | 415 |
| DmelOr1a  | ----RKLFLEPIERAQRETVLGAYF-----                               | FELGRPLLWVIFRTAGSFTTLMNALYAKY    | 389 |
| DmelOr13a | TTKRIRNQIWFMLCSQQPVRITAFK----                                | FSTLSLQSF TAILSTSI SYFTLLRSVYFDD | 413 |
| AmelOr161 | ----SVQIMMRSKIPSKITAAK----                                   | FYSMSLESFSAVLSTSFYSFTVLTATKNE-   | 385 |
| AmelOr141 | ----LQKITNILLMIRSQAQVRLTAGK----                              | FIGLSLETFAASMI STAASFYFTMVRSMN-- | 429 |
| AgamOr52  | ALREFRTTLLSILLATQRSLSLRGSD----                               | IVEVSWQTFASMLKTSYSVMMFLIELRRLN   | 386 |
| AgamOr36  | -YRQARSSLLIMMSKTQKSLGIRCGG----                               | MFEMSSEAFASLVKLTYTMLMFLRDTQKPN   | 407 |
| AgamOr25  | ----QKLLMVMIAHAQKPVLRGIF-----                                | MPLIMSSFLSVIKASYSYFTLLH-----     | 357 |
| AgamOr45  | ----QKRLMFLLANAQPEIVMGAVF-----                               | IPVTMTSFVTIIRAAYSFTTILY-----     | 383 |
| TcasOr3   | ----FKKQIIFTMTRMQKPINVTIGK----                               | ITPLAFSTFLTIARGAYSFFTFKQRHGIN    | 412 |
| DmelOr88a | ----RKFYLLWTOYQCRTQQLGAF-----                                | LIQVNMVHFTEIMQLAYRFLTFKLSH---    | 401 |
| AgamOr22  | ----DLHDILFMLRNAQRNYGFSIG-----                               | FGFLSFATFTAVMKTAYSNAFLHRVMN--    | 388 |
| DmelOr49a | ----KKEILILMAQAQRPLEISARG----                                | VIIISLDTFKILMTITRFFFAVIRQTVKE-   | 396 |
| DmelOr85f | ----KRYLLIIIRAQQPVELNAMG----                                 | YLSISLDTFKQLMSVSYRVITMLMQMIQ--   | 392 |
| AmelOr119 | ----IGQVFTLSTVFTRKSIILRASV----                               | FYVLSLETFAI IKRSYSFTLLNMDLTD     | 416 |
| DmelOr63a | ----FRHLIRMMMLRTNRGFRDLVSW----                               | FMQMSLPTLMAMVRTSGQYFLLQLQNVNQ-   | 420 |
| DmelOr67b | ----FKFMKMMMLFSRRTFVLSVGG----                                | FTSLSHKFLVQVFRLSANFFLLLRNMNKK-   | 421 |
| BmorOr21  | ----IKRMMPFMVARSQVIVETAFF-----                               | MFAFDMELFVWIMKTSYSMFTLMRS----    | 390 |
| BmorOr11  | ----IRQMMLFMLTRATEPLGIATVF-----                              | TNNSLDTFEAMCRQSYTIFNLMNAAWA--    | 397 |
| BmorOr12  | --ARIRSLVTISMNKAQQPILMWALG----                               | FVELSHKNFVAI IKSAYSVFSVY-----    | 401 |
| AgamOr33  | ----LKKDLRF TTMRSQKPFVIDVYW----                              | LFPLTYETFAIILRSYSIFTLLRMTIE--    | 373 |
| HvirOr1   | KVALSGLQFFSVTRGLLLTVAGTIVTYELVMFQFNSSTPSLNITSPTSATHIITTLAT-- |                                  | 457 |
| HvirOr5   | ----VEVERLQDQLTKDYIALSGMG----                                | FFYLNKTILLQAGAI VTYELVLIQFDDQG   | 332 |
| TcasOr1   | -----IFIICVIVQSEQIAWLHLLY----                                | IFLVGIMYAADVFIYICHVCCSTIHEVRE--  | 353 |
| TcasOr2   | -----                                                        | TIEEVISGI-----                   | 314 |

|           |                                                              |     |
|-----------|--------------------------------------------------------------|-----|
| TcasOr16  | -----                                                        |     |
| AmelOr2   | -----                                                        |     |
| AgamOr7   | -----                                                        |     |
| AaegOr7   | -----                                                        |     |
| DmelOr83b | -----                                                        |     |
| BmorOr2   | -----                                                        |     |
| BmorOr2a  | -----                                                        |     |
| HvirOr2   | -----                                                        |     |
| AgamOr56  | VN-----                                                      | 400 |
| AgamOr57  | MG-----                                                      | 400 |
| AgamOr26  | AN-----                                                      | 400 |
| AgamOr27  | VN-----                                                      | 400 |
| HvirOr9   | -----                                                        |     |
| HvirOr7   | -----                                                        |     |
| DmelOr85b | -----                                                        |     |
| DmelOr85c | -----                                                        |     |
| DmelOr85d | -----                                                        |     |
| DmelOr67a | -----                                                        |     |
| DmelOr67c | -----                                                        |     |
| DmelOr92a | -----                                                        |     |
| DmelOr69a | -----                                                        |     |
| DmelOr69b | -----                                                        |     |
| TcasOr6   | CLQFLAVKIIFKIPKPIAISFGETKGLEPLYDHLVVLHAMITLVTINLVNGFDGLFFYF  | 433 |
| TcasOr11  | -----                                                        |     |
| AgamOr41  | -----                                                        |     |
| AgamOr42  | -----                                                        |     |
| AgamOr43  | -----                                                        |     |
| AgamOr44  | -----                                                        |     |
| AgamOr66  | G-----                                                       | 393 |
| AgamOr67  | G-----                                                       | 393 |
| AgamOr72  | -----                                                        |     |
| AgamOr73  | -----                                                        |     |
| AgamOr71  | -----                                                        |     |
| AgamOr74  | -----                                                        |     |
| AgamOr70  | -----                                                        |     |
| AgamOr69  | -----                                                        |     |
| TcasOr9   | -----                                                        |     |
| TcasOr18  | KD-----                                                      | 410 |
| DmelOr83a | -----                                                        |     |
| DmelOr85e | TESEL-----                                                   | 467 |
| TcasOr24  | -----                                                        |     |
| TcasOr25  | FYIKLAVLLTVSVIILYVPVCIHIHKLFERDLDAEDFALMFSSYYGFLSTMIFYSKNHKK | 444 |
| TcasOr19  | -----                                                        |     |
| TcasOr22  | -----                                                        |     |
| TcasOr23  | -----                                                        |     |
| AmelOr168 | -----                                                        |     |
| AmelOr170 | -----                                                        |     |
| AmelOr169 | -----                                                        |     |
| DmelOr65b | -----                                                        |     |
| DmelOr65c | -----                                                        |     |
| DmelOr65a | -----                                                        |     |
| TcasOr17  | -----                                                        |     |
| TcasOr21  | -----                                                        |     |
| TcasOr56  | -----                                                        |     |
| TcasOr15  | -----                                                        |     |
| AgamOr9   | -----                                                        |     |
| AgamOr65  | -----                                                        |     |
| BmorOr6   | HVLDQQKSAENKDSK-----                                         | 406 |
| BmorOr10  | -----                                                        |     |
| AgamOr34  | -----                                                        |     |
| AgamOr37  | V-----                                                       | 393 |
| DmelOr94a | -----                                                        |     |
| DmelOr94b | -----                                                        |     |
| DmelOr71a | -----                                                        |     |
| DmelOr46a | -----                                                        |     |
| DmelOr46b | -----                                                        |     |
| HvirOr8   | -----                                                        |     |
| BmorOr8   | EE-----                                                      | 396 |

|           |                                |     |
|-----------|--------------------------------|-----|
| AmelOr68  | -----                          |     |
| AmelOr69  | -----                          |     |
| AmelOr70  | -----                          |     |
| AmelOr71  | -----                          |     |
| AmelOr72  | -----                          |     |
| DmelOr19a | LE-----                        | 387 |
| DmelOr19b | LE-----                        | 387 |
| DmelOr33a | -----                          |     |
| DmelOr33b | -----                          |     |
| DmelOr22a | RFQ-----                       | 397 |
| DmelOr22b | KFQ-----                       | 397 |
| DmelOr42b | KFKTD-----                     | 399 |
| DmelOr59b | QFQ-----                       | 398 |
| DmelOr59c | KFFSDRSNGDINP-----             | 411 |
| DmelOr98a | RLTKN-----                     | 397 |
| DmelOr42a | KLAKSEMEE-----                 | 406 |
| DmelOr85a | KLRRE-----                     | 397 |
| DmelOr43b | KLSIKE-----                    | 403 |
| AgamOr2   | -----                          |     |
| AgamOr10  | -----                          |     |
| DmelOr30a | -----                          |     |
| DmelOr49b | -----                          |     |
| DmelOr43a | -----                          |     |
| AgamOr32  | NEKKT-----                     | 384 |
| AgamOr35  | -----                          |     |
| DmelOr47a | -----                          |     |
| DmelOr98b | -----                          |     |
| DmelOr9a  | -----                          |     |
| AgamOr38  | -----                          |     |
| AgamOr39  | -----                          |     |
| DmelOr24a | -----                          |     |
| DmelOr45b | -----                          |     |
| AmelOr74  | -----                          |     |
| AmelOr86  | -----                          |     |
| AmelOr75  | M-----                         | 401 |
| AmelOr84  | -----                          |     |
| AmelOr87  | -----                          |     |
| AmelOr76  | KSDSS-----                     | 408 |
| AmelOr85  | IMDA-----                      | 412 |
| AmelOr88  | LQYACIANQSLKKEESKIIFYHQNI----- | 432 |
| AmelOr91  | N-----                         | 408 |
| AmelOr92  | IMKHD-----                     | 409 |
| AmelOr95  | S-----                         | 404 |
| AmelOr93  | S-----                         | 380 |
| AmelOr77  | -----                          |     |
| AmelOr94  | ENT-----                       | 405 |
| AmelOr96  | -----                          |     |
| AmelOr79  | NGL-----                       | 405 |
| AmelOr83  | -----                          |     |
| AmelOr80  | S-----                         | 406 |
| AmelOr81  | -----                          |     |
| AmelOr82  | NDT-----                       | 407 |
| AmelOr78  | -----                          |     |
| AmelOr89  | NEA-----                       | 404 |
| AmelOr90  | KDD-----                       | 405 |
| AmelOr142 | VN-----                        | 375 |
| AmelOr146 | EN-----                        | 374 |
| AmelOr148 | -----                          |     |
| AmelOr158 | -----                          |     |
| AmelOr147 | -----                          |     |
| AmelOr150 | -----                          |     |
| AmelOr151 | P-----                         | 373 |
| AmelOr152 | PS-----                        | 374 |
| AmelOr154 | SA-----                        | 374 |
| AmelOr155 | -----                          |     |
| AmelOr157 | -----                          |     |
| AmelOr156 | SI-----                        | 374 |
| AmelOr153 | -----                          |     |
| AmelOr144 | -----                          |     |
| AmelOr145 | -----                          |     |



|           |           |     |
|-----------|-----------|-----|
| AmelOr143 | -----     |     |
| AmelOr1   | -----     |     |
| AmelOr3   | -----     |     |
| AmelOr6   | -----     |     |
| AmelOr7   | -----     |     |
| AmelOr4   | -----     |     |
| AmelOr5   | -----     |     |
| AmelOr8   | -----     |     |
| AmelOr9   | -----     |     |
| AmelOr11  | -----     |     |
| AmelOr12  | -----     |     |
| AmelOr10  | -----     |     |
| AmelOr14  | -----     |     |
| AmelOr15  | -----     |     |
| AmelOr13  | -----     |     |
| AmelOr16  | -----     |     |
| AmelOr17  | -----     |     |
| AmelOr18  | -----     |     |
| AmelOr19  | -----     |     |
| AmelOr22  | -----     |     |
| AmelOr24  | -----     |     |
| AmelOr20  | -----     |     |
| AmelOr25  | -----     |     |
| AmelOr29  | -----     |     |
| AmelOr30  | -----     |     |
| AmelOr21  | -----     |     |
| AmelOr23  | -----     |     |
| AmelOr35  | -----     |     |
| AmelOr27  | -----     |     |
| AmelOr28  | -----     |     |
| AmelOr33  | -----     |     |
| AmelOr34  | -----     |     |
| AmelOr32  | -----     |     |
| AmelOr31  | -----     |     |
| AmelOr36  | -----     |     |
| AmelOr37  | -----     |     |
| AmelOr38  | -----     |     |
| AmelOr39  | -----     |     |
| AmelOr47  | -----     |     |
| AmelOr48  | -----     |     |
| AmelOr40  | -----     |     |
| AmelOr43  | -----     |     |
| AmelOr45  | -----     |     |
| AmelOr41  | -----     |     |
| AmelOr42  | -----     |     |
| AmelOr44  | -----     |     |
| AmelOr46  | -----     |     |
| AmelOr49  | -----     |     |
| AmelOr50  | -----     |     |
| AmelOr26  | -----     |     |
| AmelOr53  | -----     |     |
| AmelOr54  | -----     |     |
| AmelOr52  | -----     |     |
| AmelOr51  | -----     |     |
| AmelOr55  | -----     |     |
| AmelOr57  | -----     |     |
| AmelOr56  | -----     |     |
| AmelOr58  | -----     |     |
| AmelOr59  | -----     |     |
| AmelOr60  | -----     |     |
| AmelOr61  | -----     |     |
| AmelOr63  | -----     |     |
| AmelOr64  | -----     |     |
| AmelOr66  | -----     |     |
| AmelOr65  | -----     |     |
| AmelOr67  | -----     |     |
| AmelOr114 | KR-----   | 375 |
| AmelOr115 | VEGK----- | 400 |
| AmelOr118 | -----     |     |
| AmelOr164 | -----     |     |

|           |                 |     |
|-----------|-----------------|-----|
| AmelOr163 | -----           |     |
| AmelOr165 | -----           |     |
| AmelOr166 | -----           |     |
| AmelOr167 | -----           |     |
| DmelOr35a | MSN-----        | 409 |
| DmelOr74a | -----           |     |
| AgamOr3   | -----           |     |
| AgamOr5   | -----           |     |
| AgamOr13  | -----           |     |
| AgamOr15  | -----           |     |
| AgamOr17  | -----           |     |
| AgamOr16  | -----           |     |
| AgamOr55  | -----           |     |
| AgamOr18  | -----           |     |
| AgamOr14  | -----           |     |
| AgamOr51  | -----           |     |
| AgamOr12  | -----           |     |
| AgamOr19  | -----           |     |
| AgamOr20  | -----           |     |
| AgamOr21  | -----           |     |
| AgamOr50  | -----           |     |
| AgamOr29  | -----           |     |
| AgamOr53  | -----           |     |
| AgamOr30  | -----           |     |
| AgamOr46  | -----           |     |
| AgamOr47  | -----           |     |
| AgamOr48  | -----           |     |
| AgamOr49  | -----           |     |
| AgamOr61  | -----           |     |
| AgamOr62  | -----           |     |
| AgamOr63  | -----           |     |
| AgamOr60  | IAKLTSDGNN----- | 425 |
| AgamOr75  | -----           |     |
| AgamOr76  | -----           |     |
| AgamOr78  | -----           |     |
| AgamOr77  | -----           |     |
| AgamOr79  | -----           |     |
| AmelOr99  | -----           |     |
| AmelOr101 | -----           |     |
| AmelOr102 | -----           |     |
| AmelOr103 | -----           |     |
| AmelOr104 | -----           |     |
| AmelOr98  | -----           |     |
| AmelOr100 | -----           |     |
| AmelOr97  | -----           |     |
| AmelOr105 | -----           |     |
| AmelOr109 | -----           |     |
| AmelOr110 | -----           |     |
| AmelOr111 | -----           |     |
| AmelOr108 | -----           |     |
| AmelOr107 | -----           |     |
| AmelOr112 | -----           |     |
| AmelOr113 | -----           |     |
| AmelOr106 | -----           |     |
| AmelOr122 | -----           |     |
| AmelOr125 | -----           |     |
| AmelOr123 | -----           |     |
| AmelOr126 | -----           |     |
| AmelOr127 | -----           |     |
| AmelOr128 | -----           |     |
| AmelOr129 | -----           |     |
| AmelOr133 | -----           |     |
| AmelOr134 | -----           |     |
| AmelOr131 | -----           |     |
| AmelOr132 | -----           |     |
| AmelOr135 | -----           |     |
| AmelOr136 | -----           |     |
| AmelOr138 | -----           |     |
| AmelOr130 | -----           |     |
| AmelOr137 | -----           |     |

|           |               |     |
|-----------|---------------|-----|
| AmelOr139 | -----         |     |
| BmorOr20  | -----         |     |
| BmorOr3   | -----         |     |
| BmorOr18  | -----         |     |
| HvirOr6   | -----         |     |
| BmorOr23  | -----         |     |
| BmorOr16  | -----         |     |
| BmorOr4   | A-----        | 418 |
| BmorOr5   | A-----        | 419 |
| BmorOr22  | -----         |     |
| BmorOr17  | -----         |     |
| BmorOr1   | -----         |     |
| BmorOr1a  | -----         |     |
| BmorOr1b  | -----         |     |
| BmorOr19  | -----         |     |
| BmorOr15  | -----         |     |
| TcasOr5   | -----         |     |
| TcasOr7   | -----         |     |
| HvirOr4   | N-----        | 397 |
| BmorOr13  | MQ-----       | 445 |
| DmelOr10a | -----         |     |
| DmelOr33c | -----         |     |
| DmelOr7a  | RFNRTN-----   | 413 |
| DmelOr22c | -----         |     |
| AgamOr1   | -----         |     |
| AgamOr4   | VQ-----       | 396 |
| DmelOr47b | -----         |     |
| AmelOr73  | -----         |     |
| AgamOr68  | -----         |     |
| DmelOr59a | -----         |     |
| DmelOr23a | S-----        | 379 |
| AgamOr31  | -----         |     |
| DmelOr2a  | -----         |     |
| AmelOr62  | -----         |     |
| AmelOr121 | -----         |     |
| AmelOr140 | -----         |     |
| TcasOr12  | -----         |     |
| AgamOr8   | EKKMK-----    | 399 |
| BmorOr9   | GTKFQDDL----- | 388 |
| AgamOr40  | -----         |     |
| TcasOr63  | -----         |     |
| TcasOr4   | -----         |     |
| TcasOr13  | -----         |     |
| AgamOr24  | -----         |     |
| AgamOr54  | -----         |     |
| AgamOr23  | -----         |     |
| AgamOr64  | -----         |     |
| DmelOr82a | -----         |     |
| AmelOr116 | -----         |     |
| AmelOr160 | -----         |     |
| TcasOr10  | -----         |     |
| TcasOr26  | -----         |     |
| AmelOr117 | -----         |     |
| AmelOr120 | -----         |     |
| BmorOr7   | -----         |     |
| AgamOr6   | -----         |     |
| DmelOr45a | -----         |     |
| DmelOr67d | -----         |     |
| DmelOr83c | -----         |     |
| AmelOr162 | -----         |     |
| HvirOr3   | -----         |     |
| TcasOr20  | -----         |     |
| AgamOr11  | -----         |     |
| DmelOr56a | -----         |     |
| AgamOr28  | -----         |     |
| AgamOr58  | PRDQ-----     | 403 |
| AgamOr59  | -----         |     |
| DmelOr1a  | ETH-----      | 392 |
| DmelOr13a | EKKLD-----    | 418 |
| AmelOr161 | -----         |     |

|           |                                                               |     |
|-----------|---------------------------------------------------------------|-----|
| AmelOr141 | -----                                                         |     |
| AgamOr52  | R-----                                                        | 387 |
| AgamOr36  | -----                                                         |     |
| AgamOr25  | -----                                                         |     |
| AgamOr45  | -----                                                         |     |
| TcasOr3   | H-----                                                        | 413 |
| DmelOr88a | -----                                                         |     |
| AgamOr22  | -----                                                         |     |
| DmelOr49a | -----                                                         |     |
| DmelOr85f | -----                                                         |     |
| AmelOr119 | H-----                                                        | 417 |
| DmelOr63a | -----                                                         |     |
| DmelOr67b | -----                                                         |     |
| BmorOr21  | -----                                                         |     |
| BmorOr11  | -----                                                         |     |
| BmorOr12  | -----                                                         |     |
| AgamOr33  | -----                                                         |     |
| HvirOr1   | -----                                                         |     |
| HvirOr5   | NDALNATKI-----                                                | 341 |
| TcasOr1   | -----                                                         |     |
| TcasOr2   | -----                                                         |     |
|           |                                                               |     |
| TcasOr16  | -----                                                         |     |
| AmelOr2   | -----                                                         |     |
| AgamOr7   | -----                                                         |     |
| AaegOr7   | -----                                                         |     |
| DmelOr83b | -----                                                         |     |
| BmorOr2   | -----                                                         |     |
| BmorOr2a  | -----                                                         |     |
| HvirOr2   | -----                                                         |     |
| AgamOr56  | -----                                                         |     |
| AgamOr57  | -----                                                         |     |
| AgamOr26  | -----                                                         |     |
| AgamOr27  | -----                                                         |     |
| HvirOr9   | -----                                                         |     |
| HvirOr7   | -----                                                         |     |
| DmelOr85b | -----                                                         |     |
| DmelOr85c | -----                                                         |     |
| DmelOr85d | -----                                                         |     |
| DmelOr67a | -----                                                         |     |
| DmelOr67c | -----                                                         |     |
| DmelOr92a | -----                                                         |     |
| DmelOr69a | -----                                                         |     |
| DmelOr69b | -----                                                         |     |
| TcasOr6   | IGHVLTELKMKVAFGDSPIETNWSEEKRFKFAVRHHRFVLE-----                | 475 |
| TcasOr11  | -----                                                         |     |
| AgamOr41  | -----                                                         |     |
| AgamOr42  | -----                                                         |     |
| AgamOr43  | -----                                                         |     |
| AgamOr44  | -----                                                         |     |
| AgamOr66  | -----                                                         |     |
| AgamOr67  | -----                                                         |     |
| AgamOr72  | -----                                                         |     |
| AgamOr73  | -----                                                         |     |
| AgamOr71  | -----                                                         |     |
| AgamOr74  | -----                                                         |     |
| AgamOr70  | -----                                                         |     |
| AgamOr69  | -----                                                         |     |
| TcasOr9   | -----                                                         |     |
| TcasOr18  | -----                                                         |     |
| DmelOr83a | -----                                                         |     |
| DmelOr85e | -----                                                         |     |
| TcasOr24  | -----                                                         |     |
| TcasOr25  | ICGLIYNLCSFEEFGKPPQFDELNQRLLDFYSKLASGYTIIGMAVYIGMKIYKIPDCKAER | 504 |
| TcasOr19  | -----                                                         |     |
| TcasOr22  | -----                                                         |     |
| TcasOr23  | -----                                                         |     |
| AmelOr168 | -----                                                         |     |
| AmelOr170 | -----                                                         |     |

AmelOr169 -----  
DmelOr65b -----  
DmelOr65c -----  
DmelOr65a -----  
TcasOr17 -----  
TcasOr21 -----  
TcasOr56 -----  
TcasOr15 -----  
AgamOr9 -----  
AgamOr65 -----  
BmorOr6 -----  
BmorOr10 -----  
AgamOr34 -----  
AgamOr37 -----  
DmelOr94a -----  
DmelOr94b -----  
DmelOr71a -----  
DmelOr46a -----  
DmelOr46b -----  
HvirOr8 -----  
BmorOr8 -----  
AmelOr68 -----  
AmelOr69 -----  
AmelOr70 -----  
AmelOr71 -----  
AmelOr72 -----  
DmelOr19a -----  
DmelOr19b -----  
DmelOr33a -----  
DmelOr33b -----  
DmelOr22a -----  
DmelOr22b -----  
DmelOr42b -----  
DmelOr59b -----  
DmelOr59c -----  
DmelOr98a -----  
DmelOr42a -----  
DmelOr85a -----  
DmelOr43b -----  
AgamOr2 -----  
AgamOr10 -----  
DmelOr30a -----  
DmelOr49b -----  
DmelOr43a -----  
AgamOr32 -----  
AgamOr35 -----  
DmelOr47a -----  
DmelOr98b -----  
DmelOr9a -----  
AgamOr38 -----  
AgamOr39 -----  
DmelOr24a -----  
DmelOr45b -----  
AmelOr74 -----  
AmelOr86 -----  
AmelOr75 -----  
AmelOr84 -----  
AmelOr87 -----  
AmelOr76 -----  
AmelOr85 -----  
AmelOr88 -----  
AmelOr91 -----  
AmelOr92 -----  
AmelOr95 -----  
AmelOr93 -----  
AmelOr77 -----  
AmelOr94 -----  
AmelOr96 -----  
AmelOr79 -----  
AmelOr83 -----

AmelOr80 -----  
AmelOr81 -----  
AmelOr82 -----  
AmelOr78 -----  
AmelOr89 -----  
AmelOr90 -----  
AmelOr142 -----  
AmelOr146 -----  
AmelOr148 -----  
AmelOr158 -----  
AmelOr147 -----  
AmelOr150 -----  
AmelOr151 -----  
AmelOr152 -----  
AmelOr154 -----  
AmelOr155 -----  
AmelOr157 -----  
AmelOr156 -----  
AmelOr153 -----  
AmelOr144 -----  
AmelOr145 -----  
AmelOr143 -----  
AmelOr1 -----  
AmelOr3 -----  
AmelOr6 -----  
AmelOr7 -----  
AmelOr4 -----  
AmelOr5 -----  
AmelOr8 -----  
AmelOr9 -----  
AmelOr11 -----  
AmelOr12 -----  
AmelOr10 -----  
AmelOr14 -----  
AmelOr15 -----  
AmelOr13 -----  
AmelOr16 -----  
AmelOr17 -----  
AmelOr18 -----  
AmelOr19 -----  
AmelOr22 -----  
AmelOr24 -----  
AmelOr20 -----  
AmelOr25 -----  
AmelOr29 -----  
AmelOr30 -----  
AmelOr21 -----  
AmelOr23 -----  
AmelOr35 -----  
AmelOr27 -----  
AmelOr28 -----  
AmelOr33 -----  
AmelOr34 -----  
AmelOr32 -----  
AmelOr31 -----  
AmelOr36 -----  
AmelOr37 -----  
AmelOr38 -----  
AmelOr39 -----  
AmelOr47 -----  
AmelOr48 -----  
AmelOr40 -----  
AmelOr43 -----  
AmelOr45 -----  
AmelOr41 -----  
AmelOr42 -----  
AmelOr44 -----  
AmelOr46 -----  
AmelOr49 -----  
AmelOr50 -----

AmelOr26 -----  
AmelOr53 -----  
AmelOr54 -----  
AmelOr52 -----  
AmelOr51 -----  
AmelOr55 -----  
AmelOr57 -----  
AmelOr56 -----  
AmelOr58 -----  
AmelOr59 -----  
AmelOr60 -----  
AmelOr61 -----  
AmelOr63 -----  
AmelOr64 -----  
AmelOr66 -----  
AmelOr65 -----  
AmelOr67 -----  
AmelOr114 -----  
AmelOr115 -----  
AmelOr118 -----  
AmelOr164 -----  
AmelOr163 -----  
AmelOr165 -----  
AmelOr166 -----  
AmelOr167 -----  
DmelOr35a -----  
DmelOr74a -----  
AgamOr3 -----  
AgamOr5 -----  
AgamOr13 -----  
AgamOr15 -----  
AgamOr17 -----  
AgamOr16 -----  
AgamOr55 -----  
AgamOr18 -----  
AgamOr14 -----  
AgamOr51 -----  
AgamOr12 -----  
AgamOr19 -----  
AgamOr20 -----  
AgamOr21 -----  
AgamOr50 -----  
AgamOr29 -----  
AgamOr53 -----  
AgamOr30 -----  
AgamOr46 -----  
AgamOr47 -----  
AgamOr48 -----  
AgamOr49 -----  
AgamOr61 -----  
AgamOr62 -----  
AgamOr63 -----  
AgamOr60 -----  
AgamOr75 -----  
AgamOr76 -----  
AgamOr78 -----  
AgamOr77 -----  
AgamOr79 -----  
AmelOr99 -----  
AmelOr101 -----  
AmelOr102 -----  
AmelOr103 -----  
AmelOr104 -----  
AmelOr98 -----  
AmelOr100 -----  
AmelOr97 -----  
AmelOr105 -----  
AmelOr109 -----  
AmelOr110 -----  
AmelOr111 -----

AmelOr108 -----  
AmelOr107 -----  
AmelOr112 -----  
AmelOr113 -----  
AmelOr106 -----  
AmelOr122 -----  
AmelOr125 -----  
AmelOr123 -----  
AmelOr126 -----  
AmelOr127 -----  
AmelOr128 -----  
AmelOr129 -----  
AmelOr133 -----  
AmelOr134 -----  
AmelOr131 -----  
AmelOr132 -----  
AmelOr135 -----  
AmelOr136 -----  
AmelOr138 -----  
AmelOr130 -----  
AmelOr137 -----  
AmelOr139 -----  
BmorOr20 -----  
BmorOr3 -----  
BmorOr18 -----  
HvirOr6 -----  
BmorOr23 -----  
BmorOr16 -----  
BmorOr4 -----  
BmorOr5 -----  
BmorOr22 -----  
BmorOr17 -----  
BmorOr1 -----  
BmorOr1a -----  
BmorOr1b -----  
BmorOr19 -----  
BmorOr15 -----  
TcasOr5 -----  
TcasOr7 -----  
HvirOr4 -----  
BmorOr13 -----  
DmelOr10a -----  
DmelOr33c -----  
DmelOr7a -----  
DmelOr22c -----  
AgamOr1 -----  
AgamOr4 -----  
DmelOr47b -----  
AmelOr73 -----  
AgamOr68 -----  
DmelOr59a -----  
DmelOr23a -----  
AgamOr31 -----  
DmelOr2a -----  
AmelOr62 -----  
AmelOr121 -----  
AmelOr140 -----  
TcasOr12 -----  
AgamOr8 -----  
BmorOr9 -----  
AgamOr40 -----  
TcasOr63 -----  
TcasOr4 -----  
TcasOr13 -----  
AgamOr24 -----  
AgamOr54 -----  
AgamOr23 -----  
AgamOr64 -----  
DmelOr82a -----  
AmelOr116 -----



AmelOr160 -----  
TcasOr10 -----  
TcasOr26 -----  
AmelOr117 -----  
AmelOr120 -----  
BmorOr7 -----  
AgamOr6 -----  
DmelOr45a -----  
DmelOr67d -----  
DmelOr83c -----  
AmelOr162 -----  
HvirOr3 -----  
TcasOr20 -----  
AgamOr11 -----  
DmelOr56a -----  
AgamOr28 -----  
AgamOr58 -----  
AgamOr59 -----  
DmelOr1a -----  
DmelOr13a -----  
AmelOr161 -----  
AmelOr141 -----  
AgamOr52 -----  
AgamOr36 -----  
AgamOr25 -----  
AgamOr45 -----  
TcasOr3 -----  
DmelOr88a -----  
AgamOr22 -----  
DmelOr49a -----  
DmelOr85f -----  
AmelOr119 -----  
DmelOr63a -----  
DmelOr67b -----  
BmorOr21 -----  
BmorOr11 -----  
BmorOr12 -----  
AgamOr33 -----  
HvirOr1 -----  
HvirOr5 -----  
TcasOr1 -----  
TcasOr2 -----

TcasOr16 -----  
AmelOr2 -----  
AgamOr7 -----  
AaegOr7 -----  
DmelOr83b -----  
BmorOr2 -----  
BmorOr2a -----  
HvirOr2 -----  
AgamOr56 -----  
AgamOr57 -----  
AgamOr26 -----  
AgamOr27 -----  
HvirOr9 -----  
HvirOr7 -----  
DmelOr85b -----  
DmelOr85c -----  
DmelOr85d -----  
DmelOr67a -----  
DmelOr67c -----  
DmelOr92a -----  
DmelOr69a -----  
DmelOr69b -----  
TcasOr6 -----  
TcasOr11 -----  
AgamOr41 -----  
AgamOr42 -----

|           |                                                              |     |
|-----------|--------------------------------------------------------------|-----|
| AgamOr43  | -----                                                        |     |
| AgamOr44  | -----                                                        |     |
| AgamOr66  | -----                                                        |     |
| AgamOr67  | -----                                                        |     |
| AgamOr72  | -----                                                        |     |
| AgamOr73  | -----                                                        |     |
| AgamOr71  | -----                                                        |     |
| AgamOr74  | -----                                                        |     |
| AgamOr70  | -----                                                        |     |
| AgamOr69  | -----                                                        |     |
| TcasOr9   | -----                                                        |     |
| TcasOr18  | -----                                                        |     |
| DmelOr83a | -----                                                        |     |
| DmelOr85e | -----                                                        |     |
| TcasOr24  | -----                                                        |     |
| TcasOr25  | GAIQVCGLTVPLLCEQFNEAYYWTAFSHIVCSVLACACVAHQAVNQDVLAVLHYIGWIMS | 564 |
| TcasOr19  | -----                                                        |     |
| TcasOr22  | -----                                                        |     |
| TcasOr23  | -----                                                        |     |
| AmelOr168 | -----                                                        |     |
| AmelOr170 | -----                                                        |     |
| AmelOr169 | -----                                                        |     |
| DmelOr65b | -----                                                        |     |
| DmelOr65c | -----                                                        |     |
| DmelOr65a | -----                                                        |     |
| TcasOr17  | -----                                                        |     |
| TcasOr21  | -----                                                        |     |
| TcasOr56  | -----                                                        |     |
| TcasOr15  | -----                                                        |     |
| AgamOr9   | -----                                                        |     |
| AgamOr65  | -----                                                        |     |
| BmorOr6   | -----                                                        |     |
| BmorOr10  | -----                                                        |     |
| AgamOr34  | -----                                                        |     |
| AgamOr37  | -----                                                        |     |
| DmelOr94a | -----                                                        |     |
| DmelOr94b | -----                                                        |     |
| DmelOr71a | -----                                                        |     |
| DmelOr46a | -----                                                        |     |
| DmelOr46b | -----                                                        |     |
| HvirOr8   | -----                                                        |     |
| BmorOr8   | -----                                                        |     |
| AmelOr68  | -----                                                        |     |
| AmelOr69  | -----                                                        |     |
| AmelOr70  | -----                                                        |     |
| AmelOr71  | -----                                                        |     |
| AmelOr72  | -----                                                        |     |
| DmelOr19a | -----                                                        |     |
| DmelOr19b | -----                                                        |     |
| DmelOr33a | -----                                                        |     |
| DmelOr33b | -----                                                        |     |
| DmelOr22a | -----                                                        |     |
| DmelOr22b | -----                                                        |     |
| DmelOr42b | -----                                                        |     |
| DmelOr59b | -----                                                        |     |
| DmelOr59c | -----                                                        |     |
| DmelOr98a | -----                                                        |     |
| DmelOr42a | -----                                                        |     |
| DmelOr85a | -----                                                        |     |
| DmelOr43b | -----                                                        |     |
| AgamOr2   | -----                                                        |     |
| AgamOr10  | -----                                                        |     |
| DmelOr30a | -----                                                        |     |
| DmelOr49b | -----                                                        |     |
| DmelOr43a | -----                                                        |     |
| AgamOr32  | -----                                                        |     |
| AgamOr35  | -----                                                        |     |
| DmelOr47a | -----                                                        |     |
| DmelOr98b | -----                                                        |     |
| DmelOr9a  | -----                                                        |     |

AgamOr38 -----  
AgamOr39 -----  
DmelOr24a -----  
DmelOr45b -----  
AmelOr74 -----  
AmelOr86 -----  
AmelOr75 -----  
AmelOr84 -----  
AmelOr87 -----  
AmelOr76 -----  
AmelOr85 -----  
AmelOr88 -----  
AmelOr91 -----  
AmelOr92 -----  
AmelOr95 -----  
AmelOr93 -----  
AmelOr77 -----  
AmelOr94 -----  
AmelOr96 -----  
AmelOr79 -----  
AmelOr83 -----  
AmelOr80 -----  
AmelOr81 -----  
AmelOr82 -----  
AmelOr78 -----  
AmelOr89 -----  
AmelOr90 -----  
AmelOr142 -----  
AmelOr146 -----  
AmelOr148 -----  
AmelOr158 -----  
AmelOr147 -----  
AmelOr150 -----  
AmelOr151 -----  
AmelOr152 -----  
AmelOr154 -----  
AmelOr155 -----  
AmelOr157 -----  
AmelOr156 -----  
AmelOr153 -----  
AmelOr144 -----  
AmelOr145 -----  
AmelOr143 -----  
AmelOr1 -----  
AmelOr3 -----  
AmelOr6 -----  
AmelOr7 -----  
AmelOr4 -----  
AmelOr5 -----  
AmelOr8 -----  
AmelOr9 -----  
AmelOr11 -----  
AmelOr12 -----  
AmelOr10 -----  
AmelOr14 -----  
AmelOr15 -----  
AmelOr13 -----  
AmelOr16 -----  
AmelOr17 -----  
AmelOr18 -----  
AmelOr19 -----  
AmelOr22 -----  
AmelOr24 -----  
AmelOr20 -----  
AmelOr25 -----  
AmelOr29 -----  
AmelOr30 -----  
AmelOr21 -----  
AmelOr23 -----  
AmelOr35 -----

AmelOr27 -----  
AmelOr28 -----  
AmelOr33 -----  
AmelOr34 -----  
AmelOr32 -----  
AmelOr31 -----  
AmelOr36 -----  
AmelOr37 -----  
AmelOr38 -----  
AmelOr39 -----  
AmelOr47 -----  
AmelOr48 -----  
AmelOr40 -----  
AmelOr43 -----  
AmelOr45 -----  
AmelOr41 -----  
AmelOr42 -----  
AmelOr44 -----  
AmelOr46 -----  
AmelOr49 -----  
AmelOr50 -----  
AmelOr26 -----  
AmelOr53 -----  
AmelOr54 -----  
AmelOr52 -----  
AmelOr51 -----  
AmelOr55 -----  
AmelOr57 -----  
AmelOr56 -----  
AmelOr58 -----  
AmelOr59 -----  
AmelOr60 -----  
AmelOr61 -----  
AmelOr63 -----  
AmelOr64 -----  
AmelOr66 -----  
AmelOr65 -----  
AmelOr67 -----  
AmelOr114 -----  
AmelOr115 -----  
AmelOr118 -----  
AmelOr164 -----  
AmelOr163 -----  
AmelOr165 -----  
AmelOr166 -----  
AmelOr167 -----  
DmelOr35a -----  
DmelOr74a -----  
AgamOr3 -----  
AgamOr5 -----  
AgamOr13 -----  
AgamOr15 -----  
AgamOr17 -----  
AgamOr16 -----  
AgamOr55 -----  
AgamOr18 -----  
AgamOr14 -----  
AgamOr51 -----  
AgamOr12 -----  
AgamOr19 -----  
AgamOr20 -----  
AgamOr21 -----  
AgamOr50 -----  
AgamOr29 -----  
AgamOr53 -----  
AgamOr30 -----  
AgamOr46 -----  
AgamOr47 -----  
AgamOr48 -----  
AgamOr49 -----

AgamOr61 -----  
AgamOr62 -----  
AgamOr63 -----  
AgamOr60 -----  
AgamOr75 -----  
AgamOr76 -----  
AgamOr78 -----  
AgamOr77 -----  
AgamOr79 -----  
AmelOr99 -----  
AmelOr101 -----  
AmelOr102 -----  
AmelOr103 -----  
AmelOr104 -----  
AmelOr98 -----  
AmelOr100 -----  
AmelOr97 -----  
AmelOr105 -----  
AmelOr109 -----  
AmelOr110 -----  
AmelOr111 -----  
AmelOr108 -----  
AmelOr107 -----  
AmelOr112 -----  
AmelOr113 -----  
AmelOr106 -----  
AmelOr122 -----  
AmelOr125 -----  
AmelOr123 -----  
AmelOr126 -----  
AmelOr127 -----  
AmelOr128 -----  
AmelOr129 -----  
AmelOr133 -----  
AmelOr134 -----  
AmelOr131 -----  
AmelOr132 -----  
AmelOr135 -----  
AmelOr136 -----  
AmelOr138 -----  
AmelOr130 -----  
AmelOr137 -----  
AmelOr139 -----  
BmorOr20 -----  
BmorOr3 -----  
BmorOr18 -----  
HvirOr6 -----  
BmorOr23 -----  
BmorOr16 -----  
BmorOr4 -----  
BmorOr5 -----  
BmorOr22 -----  
BmorOr17 -----  
BmorOr1 -----  
BmorOr1a -----  
BmorOr1b -----  
BmorOr19 -----  
BmorOr15 -----  
TcasOr5 -----  
TcasOr7 -----  
HvirOr4 -----  
BmorOr13 -----  
DmelOr10a -----  
DmelOr33c -----  
DmelOr7a -----  
DmelOr22c -----  
AgamOr1 -----  
AgamOr4 -----  
DmelOr47b -----  
AmelOr73 -----

|           |       |
|-----------|-------|
| AgamOr68  | ----- |
| DmelOr59a | ----- |
| DmelOr23a | ----- |
| AgamOr31  | ----- |
| DmelOr2a  | ----- |
| AmelOr62  | ----- |
| AmelOr121 | ----- |
| AmelOr140 | ----- |
| TcasOr12  | ----- |
| AgamOr8   | ----- |
| BmorOr9   | ----- |
| AgamOr40  | ----- |
| TcasOr63  | ----- |
| TcasOr4   | ----- |
| TcasOr13  | ----- |
| AgamOr24  | ----- |
| AgamOr54  | ----- |
| AgamOr23  | ----- |
| AgamOr64  | ----- |
| DmelOr82a | ----- |
| AmelOr116 | ----- |
| AmelOr160 | ----- |
| TcasOr10  | ----- |
| TcasOr26  | ----- |
| AmelOr117 | ----- |
| AmelOr120 | ----- |
| BmorOr7   | ----- |
| AgamOr6   | ----- |
| DmelOr45a | ----- |
| DmelOr67d | ----- |
| DmelOr83c | ----- |
| AmelOr162 | ----- |
| HvirOr3   | ----- |
| TcasOr20  | ----- |
| AgamOr11  | ----- |
| DmelOr56a | ----- |
| AgamOr28  | ----- |
| AgamOr58  | ----- |
| AgamOr59  | ----- |
| DmelOr1a  | ----- |
| DmelOr13a | ----- |
| AmelOr161 | ----- |
| AmelOr141 | ----- |
| AgamOr52  | ----- |
| AgamOr36  | ----- |
| AgamOr25  | ----- |
| AgamOr45  | ----- |
| TcasOr3   | ----- |
| DmelOr88a | ----- |
| AgamOr22  | ----- |
| DmelOr49a | ----- |
| DmelOr85f | ----- |
| AmelOr119 | ----- |
| DmelOr63a | ----- |
| DmelOr67b | ----- |
| BmorOr21  | ----- |
| BmorOr11  | ----- |
| BmorOr12  | ----- |
| AgamOr33  | ----- |
| HvirOr1   | ----- |
| HvirOr5   | ----- |
| TcasOr1   | ----- |
| TcasOr2   | ----- |
|           |       |
| TcasOr16  | ----- |
| AmelOr2   | ----- |
| AgamOr7   | ----- |
| AaegOr7   | ----- |
| DmelOr83b | ----- |

|           |                                                                  |
|-----------|------------------------------------------------------------------|
| BmorOr2   | -----                                                            |
| BmorOr2a  | -----                                                            |
| HvirOr2   | -----                                                            |
| AgamOr56  | -----                                                            |
| AgamOr57  | -----                                                            |
| AgamOr26  | -----                                                            |
| AgamOr27  | -----                                                            |
| HvirOr9   | -----                                                            |
| HvirOr7   | -----                                                            |
| DmelOr85b | -----                                                            |
| DmelOr85c | -----                                                            |
| DmelOr85d | -----                                                            |
| DmelOr67a | -----                                                            |
| DmelOr67c | -----                                                            |
| DmelOr92a | -----                                                            |
| DmelOr69a | -----                                                            |
| DmelOr69b | -----                                                            |
| TcasOr6   | -----                                                            |
| TcasOr11  | -----                                                            |
| AgamOr41  | -----                                                            |
| AgamOr42  | -----                                                            |
| AgamOr43  | -----                                                            |
| AgamOr44  | -----                                                            |
| AgamOr66  | -----                                                            |
| AgamOr67  | -----                                                            |
| AgamOr72  | -----                                                            |
| AgamOr73  | -----                                                            |
| AgamOr71  | -----                                                            |
| AgamOr74  | -----                                                            |
| AgamOr70  | -----                                                            |
| AgamOr69  | -----                                                            |
| TcasOr9   | -----                                                            |
| TcasOr18  | -----                                                            |
| DmelOr83a | -----                                                            |
| DmelOr85e | -----                                                            |
| TcasOr24  | -----                                                            |
| TcasOr25  | IFVVCWAGQILTDSSVTVADACFGSNWLRACPRLRRDLSFMMRRSQKCVELRAGPFNVLC 624 |
| TcasOr19  | -----                                                            |
| TcasOr22  | -----                                                            |
| TcasOr23  | -----                                                            |
| AmelOr168 | -----                                                            |
| AmelOr170 | -----                                                            |
| AmelOr169 | -----                                                            |
| DmelOr65b | -----                                                            |
| DmelOr65c | -----                                                            |
| DmelOr65a | -----                                                            |
| TcasOr17  | -----                                                            |
| TcasOr21  | -----                                                            |
| TcasOr56  | -----                                                            |
| TcasOr15  | -----                                                            |
| AgamOr9   | -----                                                            |
| AgamOr65  | -----                                                            |
| BmorOr6   | -----                                                            |
| BmorOr10  | -----                                                            |
| AgamOr34  | -----                                                            |
| AgamOr37  | -----                                                            |
| DmelOr94a | -----                                                            |
| DmelOr94b | -----                                                            |
| DmelOr71a | -----                                                            |
| DmelOr46a | -----                                                            |
| DmelOr46b | -----                                                            |
| HvirOr8   | -----                                                            |
| BmorOr8   | -----                                                            |
| AmelOr68  | -----                                                            |
| AmelOr69  | -----                                                            |
| AmelOr70  | -----                                                            |
| AmelOr71  | -----                                                            |
| AmelOr72  | -----                                                            |
| DmelOr19a | -----                                                            |
| DmelOr19b | -----                                                            |

Dme1Or33a -----  
Dme1Or33b -----  
Dme1Or22a -----  
Dme1Or22b -----  
Dme1Or42b -----  
Dme1Or59b -----  
Dme1Or59c -----  
Dme1Or98a -----  
Dme1Or42a -----  
Dme1Or85a -----  
Dme1Or43b -----  
AgamOr2 -----  
AgamOr10 -----  
Dme1Or30a -----  
Dme1Or49b -----  
Dme1Or43a -----  
AgamOr32 -----  
AgamOr35 -----  
Dme1Or47a -----  
Dme1Or98b -----  
Dme1Or9a -----  
AgamOr38 -----  
AgamOr39 -----  
Dme1Or24a -----  
Dme1Or45b -----  
Ame1Or74 -----  
Ame1Or86 -----  
Ame1Or75 -----  
Ame1Or84 -----  
Ame1Or87 -----  
Ame1Or76 -----  
Ame1Or85 -----  
Ame1Or88 -----  
Ame1Or91 -----  
Ame1Or92 -----  
Ame1Or95 -----  
Ame1Or93 -----  
Ame1Or77 -----  
Ame1Or94 -----  
Ame1Or96 -----  
Ame1Or79 -----  
Ame1Or83 -----  
Ame1Or80 -----  
Ame1Or81 -----  
Ame1Or82 -----  
Ame1Or78 -----  
Ame1Or89 -----  
Ame1Or90 -----  
Ame1Or142 -----  
Ame1Or146 -----  
Ame1Or148 -----  
Ame1Or158 -----  
Ame1Or147 -----  
Ame1Or150 -----  
Ame1Or151 -----  
Ame1Or152 -----  
Ame1Or154 -----  
Ame1Or155 -----  
Ame1Or157 -----  
Ame1Or156 -----  
Ame1Or153 -----  
Ame1Or144 -----  
Ame1Or145 -----  
Ame1Or143 -----  
Ame1Or1 -----  
Ame1Or3 -----  
Ame1Or6 -----  
Ame1Or7 -----  
Ame1Or4 -----  
Ame1Or5 -----



AmelOr8 -----  
AmelOr9 -----  
AmelOr11 -----  
AmelOr12 -----  
AmelOr10 -----  
AmelOr14 -----  
AmelOr15 -----  
AmelOr13 -----  
AmelOr16 -----  
AmelOr17 -----  
AmelOr18 -----  
AmelOr19 -----  
AmelOr22 -----  
AmelOr24 -----  
AmelOr20 -----  
AmelOr25 -----  
AmelOr29 -----  
AmelOr30 -----  
AmelOr21 -----  
AmelOr23 -----  
AmelOr35 -----  
AmelOr27 -----  
AmelOr28 -----  
AmelOr33 -----  
AmelOr34 -----  
AmelOr32 -----  
AmelOr31 -----  
AmelOr36 -----  
AmelOr37 -----  
AmelOr38 -----  
AmelOr39 -----  
AmelOr47 -----  
AmelOr48 -----  
AmelOr40 -----  
AmelOr43 -----  
AmelOr45 -----  
AmelOr41 -----  
AmelOr42 -----  
AmelOr44 -----  
AmelOr46 -----  
AmelOr49 -----  
AmelOr50 -----  
AmelOr26 -----  
AmelOr53 -----  
AmelOr54 -----  
AmelOr52 -----  
AmelOr51 -----  
AmelOr55 -----  
AmelOr57 -----  
AmelOr56 -----  
AmelOr58 -----  
AmelOr59 -----  
AmelOr60 -----  
AmelOr61 -----  
AmelOr63 -----  
AmelOr64 -----  
AmelOr66 -----  
AmelOr65 -----  
AmelOr67 -----  
AmelOr114 -----  
AmelOr115 -----  
AmelOr118 -----  
AmelOr164 -----  
AmelOr163 -----  
AmelOr165 -----  
AmelOr166 -----  
AmelOr167 -----  
DmelOr35a -----  
DmelOr74a -----  
AgamOr3 -----

AgamOr5 -----  
AgamOr13 -----  
AgamOr15 -----  
AgamOr17 -----  
AgamOr16 -----  
AgamOr55 -----  
AgamOr18 -----  
AgamOr14 -----  
AgamOr51 -----  
AgamOr12 -----  
AgamOr19 -----  
AgamOr20 -----  
AgamOr21 -----  
AgamOr50 -----  
AgamOr29 -----  
AgamOr53 -----  
AgamOr30 -----  
AgamOr46 -----  
AgamOr47 -----  
AgamOr48 -----  
AgamOr49 -----  
AgamOr61 -----  
AgamOr62 -----  
AgamOr63 -----  
AgamOr60 -----  
AgamOr75 -----  
AgamOr76 -----  
AgamOr78 -----  
AgamOr77 -----  
AgamOr79 -----  
AmelOr99 -----  
AmelOr101 -----  
AmelOr102 -----  
AmelOr103 -----  
AmelOr104 -----  
AmelOr98 -----  
AmelOr100 -----  
AmelOr97 -----  
AmelOr105 -----  
AmelOr109 -----  
AmelOr110 -----  
AmelOr111 -----  
AmelOr108 -----  
AmelOr107 -----  
AmelOr112 -----  
AmelOr113 -----  
AmelOr106 -----  
AmelOr122 -----  
AmelOr125 -----  
AmelOr123 -----  
AmelOr126 -----  
AmelOr127 -----  
AmelOr128 -----  
AmelOr129 -----  
AmelOr133 -----  
AmelOr134 -----  
AmelOr131 -----  
AmelOr132 -----  
AmelOr135 -----  
AmelOr136 -----  
AmelOr138 -----  
AmelOr130 -----  
AmelOr137 -----  
AmelOr139 -----  
BmorOr20 -----  
BmorOr3 -----  
BmorOr18 -----  
HvirOr6 -----  
BmorOr23 -----  
BmorOr16 -----

BmorOr4 -----  
BmorOr5 -----  
BmorOr22 -----  
BmorOr17 -----  
BmorOr1 -----  
BmorOr1a -----  
BmorOr1b -----  
BmorOr19 -----  
BmorOr15 -----  
TcasOr5 -----  
TcasOr7 -----  
HvirOr4 -----  
BmorOr13 -----  
DmelOr10a -----  
DmelOr33c -----  
DmelOr7a -----  
DmelOr22c -----  
AgamOr1 -----  
AgamOr4 -----  
DmelOr47b -----  
AmelOr73 -----  
AgamOr68 -----  
DmelOr59a -----  
DmelOr23a -----  
AgamOr31 -----  
DmelOr2a -----  
AmelOr62 -----  
AmelOr121 -----  
AmelOr140 -----  
TcasOr12 -----  
AgamOr8 -----  
BmorOr9 -----  
AgamOr40 -----  
TcasOr63 -----  
TcasOr4 -----  
TcasOr13 -----  
AgamOr24 -----  
AgamOr54 -----  
AgamOr23 -----  
AgamOr64 -----  
DmelOr82a -----  
AmelOr116 -----  
AmelOr160 -----  
TcasOr10 -----  
TcasOr26 -----  
AmelOr117 -----  
AmelOr120 -----  
BmorOr7 -----  
AgamOr6 -----  
DmelOr45a -----  
DmelOr67d -----  
DmelOr83c -----  
AmelOr162 -----  
HvirOr3 -----  
TcasOr20 -----  
AgamOr11 -----  
DmelOr56a -----  
AgamOr28 -----  
AgamOr58 -----  
AgamOr59 -----  
DmelOr1a -----  
DmelOr13a -----  
AmelOr161 -----  
AmelOr141 -----  
AgamOr52 -----  
AgamOr36 -----  
AgamOr25 -----  
AgamOr45 -----  
TcasOr3 -----  
DmelOr88a -----

AgamOr22 -----  
DmelOr49a -----  
DmelOr85f -----  
AmelOr119 -----  
DmelOr63a -----  
DmelOr67b -----  
BmorOr21 -----  
BmorOr11 -----  
BmorOr12 -----  
AgamOr33 -----  
HvirOr1 -----  
HvirOr5 -----  
TcasOr1 -----  
TcasOr2 -----

TcasOr16 -----  
AmelOr2 -----  
AgamOr7 -----  
AaegOr7 -----  
DmelOr83b -----  
BmorOr2 -----  
BmorOr2a -----  
HvirOr2 -----  
AgamOr56 -----  
AgamOr57 -----  
AgamOr26 -----  
AgamOr27 -----  
HvirOr9 -----  
HvirOr7 -----  
DmelOr85b -----  
DmelOr85c -----  
DmelOr85d -----  
DmelOr67a -----  
DmelOr67c -----  
DmelOr92a -----  
DmelOr69a -----  
DmelOr69b -----  
TcasOr6 -----  
TcasOr11 -----  
AgamOr41 -----  
AgamOr42 -----  
AgamOr43 -----  
AgamOr44 -----  
AgamOr66 -----  
AgamOr67 -----  
AgamOr72 -----  
AgamOr73 -----  
AgamOr71 -----  
AgamOr74 -----  
AgamOr70 -----  
AgamOr69 -----  
TcasOr9 -----  
TcasOr18 -----  
DmelOr83a -----  
DmelOr85e -----  
TcasOr24 -----  
TcasOr25 FSLFVSP IITKHICERQNAARHFDDICGLVTNSWMPFDIKKFPNKQLFYLWQTYSVYWTY 684  
TcasOr19 -----  
TcasOr22 -----  
TcasOr23 -----  
AmelOr168 -----  
AmelOr170 -----  
AmelOr169 -----  
DmelOr65b -----  
DmelOr65c -----  
DmelOr65a -----  
TcasOr17 -----  
TcasOr21 -----  
TcasOr56 -----

TcasOr15 -----  
AgamOr9 -----  
AgamOr65 -----  
BmorOr6 -----  
BmorOr10 -----  
AgamOr34 -----  
AgamOr37 -----  
DmelOr94a -----  
DmelOr94b -----  
DmelOr71a -----  
DmelOr46a -----  
DmelOr46b -----  
HvirOr8 -----  
BmorOr8 -----  
AmelOr68 -----  
AmelOr69 -----  
AmelOr70 -----  
AmelOr71 -----  
AmelOr72 -----  
DmelOr19a -----  
DmelOr19b -----  
DmelOr33a -----  
DmelOr33b -----  
DmelOr22a -----  
DmelOr22b -----  
DmelOr42b -----  
DmelOr59b -----  
DmelOr59c -----  
DmelOr98a -----  
DmelOr42a -----  
DmelOr85a -----  
DmelOr43b -----  
AgamOr2 -----  
AgamOr10 -----  
DmelOr30a -----  
DmelOr49b -----  
DmelOr43a -----  
AgamOr32 -----  
AgamOr35 -----  
DmelOr47a -----  
DmelOr98b -----  
DmelOr9a -----  
AgamOr38 -----  
AgamOr39 -----  
DmelOr24a -----  
DmelOr45b -----  
AmelOr74 -----  
AmelOr86 -----  
AmelOr75 -----  
AmelOr84 -----  
AmelOr87 -----  
AmelOr76 -----  
AmelOr85 -----  
AmelOr88 -----  
AmelOr91 -----  
AmelOr92 -----  
AmelOr95 -----  
AmelOr93 -----  
AmelOr77 -----  
AmelOr94 -----  
AmelOr96 -----  
AmelOr79 -----  
AmelOr83 -----  
AmelOr80 -----  
AmelOr81 -----  
AmelOr82 -----  
AmelOr78 -----  
AmelOr89 -----  
AmelOr90 -----  
AmelOr142 -----

AmelOr146 -----  
AmelOr148 -----  
AmelOr158 -----  
AmelOr147 -----  
AmelOr150 -----  
AmelOr151 -----  
AmelOr152 -----  
AmelOr154 -----  
AmelOr155 -----  
AmelOr157 -----  
AmelOr156 -----  
AmelOr153 -----  
AmelOr144 -----  
AmelOr145 -----  
AmelOr143 -----  
AmelOr1 -----  
AmelOr3 -----  
AmelOr6 -----  
AmelOr7 -----  
AmelOr4 -----  
AmelOr5 -----  
AmelOr8 -----  
AmelOr9 -----  
AmelOr11 -----  
AmelOr12 -----  
AmelOr10 -----  
AmelOr14 -----  
AmelOr15 -----  
AmelOr13 -----  
AmelOr16 -----  
AmelOr17 -----  
AmelOr18 -----  
AmelOr19 -----  
AmelOr22 -----  
AmelOr24 -----  
AmelOr20 -----  
AmelOr25 -----  
AmelOr29 -----  
AmelOr30 -----  
AmelOr21 -----  
AmelOr23 -----  
AmelOr35 -----  
AmelOr27 -----  
AmelOr28 -----  
AmelOr33 -----  
AmelOr34 -----  
AmelOr32 -----  
AmelOr31 -----  
AmelOr36 -----  
AmelOr37 -----  
AmelOr38 -----  
AmelOr39 -----  
AmelOr47 -----  
AmelOr48 -----  
AmelOr40 -----  
AmelOr43 -----  
AmelOr45 -----  
AmelOr41 -----  
AmelOr42 -----  
AmelOr44 -----  
AmelOr46 -----  
AmelOr49 -----  
AmelOr50 -----  
AmelOr26 -----  
AmelOr53 -----  
AmelOr54 -----  
AmelOr52 -----  
AmelOr51 -----  
AmelOr55 -----  
AmelOr57 -----

AmelOr56 -----  
AmelOr58 -----  
AmelOr59 -----  
AmelOr60 -----  
AmelOr61 -----  
AmelOr63 -----  
AmelOr64 -----  
AmelOr66 -----  
AmelOr65 -----  
AmelOr67 -----  
AmelOr114 -----  
AmelOr115 -----  
AmelOr118 -----  
AmelOr164 -----  
AmelOr163 -----  
AmelOr165 -----  
AmelOr166 -----  
AmelOr167 -----  
DmelOr35a -----  
DmelOr74a -----  
AgamOr3 -----  
AgamOr5 -----  
AgamOr13 -----  
AgamOr15 -----  
AgamOr17 -----  
AgamOr16 -----  
AgamOr55 -----  
AgamOr18 -----  
AgamOr14 -----  
AgamOr51 -----  
AgamOr12 -----  
AgamOr19 -----  
AgamOr20 -----  
AgamOr21 -----  
AgamOr50 -----  
AgamOr29 -----  
AgamOr53 -----  
AgamOr30 -----  
AgamOr46 -----  
AgamOr47 -----  
AgamOr48 -----  
AgamOr49 -----  
AgamOr61 -----  
AgamOr62 -----  
AgamOr63 -----  
AgamOr60 -----  
AgamOr75 -----  
AgamOr76 -----  
AgamOr78 -----  
AgamOr77 -----  
AgamOr79 -----  
AmelOr99 -----  
AmelOr101 -----  
AmelOr102 -----  
AmelOr103 -----  
AmelOr104 -----  
AmelOr98 -----  
AmelOr100 -----  
AmelOr97 -----  
AmelOr105 -----  
AmelOr109 -----  
AmelOr110 -----  
AmelOr111 -----  
AmelOr108 -----  
AmelOr107 -----  
AmelOr112 -----  
AmelOr113 -----  
AmelOr106 -----  
AmelOr122 -----  
AmelOr125 -----

AmelOr123 -----  
AmelOr126 -----  
AmelOr127 -----  
AmelOr128 -----  
AmelOr129 -----  
AmelOr133 -----  
AmelOr134 -----  
AmelOr131 -----  
AmelOr132 -----  
AmelOr135 -----  
AmelOr136 -----  
AmelOr138 -----  
AmelOr130 -----  
AmelOr137 -----  
AmelOr139 -----  
BmorOr20 -----  
BmorOr3 -----  
BmorOr18 -----  
HvirOr6 -----  
BmorOr23 -----  
BmorOr16 -----  
BmorOr4 -----  
BmorOr5 -----  
BmorOr22 -----  
BmorOr17 -----  
BmorOr1 -----  
BmorOr1a -----  
BmorOr1b -----  
BmorOr19 -----  
BmorOr15 -----  
TcasOr5 -----  
TcasOr7 -----  
HvirOr4 -----  
BmorOr13 -----  
DmelOr10a -----  
DmelOr33c -----  
DmelOr7a -----  
DmelOr22c -----  
AgamOr1 -----  
AgamOr4 -----  
DmelOr47b -----  
AmelOr73 -----  
AgamOr68 -----  
DmelOr59a -----  
DmelOr23a -----  
AgamOr31 -----  
DmelOr2a -----  
AmelOr62 -----  
AmelOr121 -----  
AmelOr140 -----  
TcasOr12 -----  
AgamOr8 -----  
BmorOr9 -----  
AgamOr40 -----  
TcasOr63 -----  
TcasOr4 -----  
TcasOr13 -----  
AgamOr24 -----  
AgamOr54 -----  
AgamOr23 -----  
AgamOr64 -----  
DmelOr82a -----  
AmelOr116 -----  
AmelOr160 -----  
TcasOr10 -----  
TcasOr26 -----  
AmelOr117 -----  
AmelOr120 -----  
BmorOr7 -----  
AgamOr6 -----



DmelOr45a -----  
DmelOr67d -----  
DmelOr83c -----  
AmelOr162 -----  
HvirOr3 -----  
TcasOr20 -----  
AgamOr11 -----  
DmelOr56a -----  
AgamOr28 -----  
AgamOr58 -----  
AgamOr59 -----  
DmelOr1a -----  
DmelOr13a -----  
AmelOr161 -----  
AmelOr141 -----  
AgamOr52 -----  
AgamOr36 -----  
AgamOr25 -----  
AgamOr45 -----  
TcasOr3 -----  
DmelOr88a -----  
AgamOr22 -----  
DmelOr49a -----  
DmelOr85f -----  
AmelOr119 -----  
DmelOr63a -----  
DmelOr67b -----  
BmorOr21 -----  
BmorOr11 -----  
BmorOr12 -----  
AgamOr33 -----  
HvirOr1 -----  
HvirOr5 -----  
TcasOr1 -----  
TcasOr2 -----

TcasOr16 -----  
AmelOr2 -----  
AgamOr7 -----  
AaegOr7 -----  
DmelOr83b -----  
BmorOr2 -----  
BmorOr2a -----  
HvirOr2 -----  
AgamOr56 -----  
AgamOr57 -----  
AgamOr26 -----  
AgamOr27 -----  
HvirOr9 -----  
HvirOr7 -----  
DmelOr85b -----  
DmelOr85c -----  
DmelOr85d -----  
DmelOr67a -----  
DmelOr67c -----  
DmelOr92a -----  
DmelOr69a -----  
DmelOr69b -----  
TcasOr6 -----  
TcasOr11 -----  
AgamOr41 -----  
AgamOr42 -----  
AgamOr43 -----  
AgamOr44 -----  
AgamOr66 -----  
AgamOr67 -----  
AgamOr72 -----  
AgamOr73 -----  
AgamOr71 -----

|           |                                                                 |
|-----------|-----------------------------------------------------------------|
| AgamOr74  | -----                                                           |
| AgamOr70  | -----                                                           |
| AgamOr69  | -----                                                           |
| TcasOr9   | -----                                                           |
| TcasOr18  | -----                                                           |
| DmelOr83a | -----                                                           |
| DmelOr85e | -----                                                           |
| TcasOr24  | -----                                                           |
| TcasOr25  | EGSAAISYLIVATMEHVLMRIWHLQGMIQEAINTEDAQVRKSRLDKCLEYHNHVFLAAD 744 |
| TcasOr19  | -----                                                           |
| TcasOr22  | -----                                                           |
| TcasOr23  | -----                                                           |
| AmelOr168 | -----                                                           |
| AmelOr170 | -----                                                           |
| AmelOr169 | -----                                                           |
| DmelOr65b | -----                                                           |
| DmelOr65c | -----                                                           |
| DmelOr65a | -----                                                           |
| TcasOr17  | -----                                                           |
| TcasOr21  | -----                                                           |
| TcasOr56  | -----                                                           |
| TcasOr15  | -----                                                           |
| AgamOr9   | -----                                                           |
| AgamOr65  | -----                                                           |
| BmorOr6   | -----                                                           |
| BmorOr10  | -----                                                           |
| AgamOr34  | -----                                                           |
| AgamOr37  | -----                                                           |
| DmelOr94a | -----                                                           |
| DmelOr94b | -----                                                           |
| DmelOr71a | -----                                                           |
| DmelOr46a | -----                                                           |
| DmelOr46b | -----                                                           |
| HvirOr8   | -----                                                           |
| BmorOr8   | -----                                                           |
| AmelOr68  | -----                                                           |
| AmelOr69  | -----                                                           |
| AmelOr70  | -----                                                           |
| AmelOr71  | -----                                                           |
| AmelOr72  | -----                                                           |
| DmelOr19a | -----                                                           |
| DmelOr19b | -----                                                           |
| DmelOr33a | -----                                                           |
| DmelOr33b | -----                                                           |
| DmelOr22a | -----                                                           |
| DmelOr22b | -----                                                           |
| DmelOr42b | -----                                                           |
| DmelOr59b | -----                                                           |
| DmelOr59c | -----                                                           |
| DmelOr98a | -----                                                           |
| DmelOr42a | -----                                                           |
| DmelOr85a | -----                                                           |
| DmelOr43b | -----                                                           |
| AgamOr2   | -----                                                           |
| AgamOr10  | -----                                                           |
| DmelOr30a | -----                                                           |
| DmelOr49b | -----                                                           |
| DmelOr43a | -----                                                           |
| AgamOr32  | -----                                                           |
| AgamOr35  | -----                                                           |
| DmelOr47a | -----                                                           |
| DmelOr98b | -----                                                           |
| DmelOr9a  | -----                                                           |
| AgamOr38  | -----                                                           |
| AgamOr39  | -----                                                           |
| DmelOr24a | -----                                                           |
| DmelOr45b | -----                                                           |
| AmelOr74  | -----                                                           |
| AmelOr86  | -----                                                           |
| AmelOr75  | -----                                                           |

AmelOr84 -----  
AmelOr87 -----  
AmelOr76 -----  
AmelOr85 -----  
AmelOr88 -----  
AmelOr91 -----  
AmelOr92 -----  
AmelOr95 -----  
AmelOr93 -----  
AmelOr77 -----  
AmelOr94 -----  
AmelOr96 -----  
AmelOr79 -----  
AmelOr83 -----  
AmelOr80 -----  
AmelOr81 -----  
AmelOr82 -----  
AmelOr78 -----  
AmelOr89 -----  
AmelOr90 -----  
AmelOr142 -----  
AmelOr146 -----  
AmelOr148 -----  
AmelOr158 -----  
AmelOr147 -----  
AmelOr150 -----  
AmelOr151 -----  
AmelOr152 -----  
AmelOr154 -----  
AmelOr155 -----  
AmelOr157 -----  
AmelOr156 -----  
AmelOr153 -----  
AmelOr144 -----  
AmelOr145 -----  
AmelOr143 -----  
AmelOr1 -----  
AmelOr3 -----  
AmelOr6 -----  
AmelOr7 -----  
AmelOr4 -----  
AmelOr5 -----  
AmelOr8 -----  
AmelOr9 -----  
AmelOr11 -----  
AmelOr12 -----  
AmelOr10 -----  
AmelOr14 -----  
AmelOr15 -----  
AmelOr13 -----  
AmelOr16 -----  
AmelOr17 -----  
AmelOr18 -----  
AmelOr19 -----  
AmelOr22 -----  
AmelOr24 -----  
AmelOr20 -----  
AmelOr25 -----  
AmelOr29 -----  
AmelOr30 -----  
AmelOr21 -----  
AmelOr23 -----  
AmelOr35 -----  
AmelOr27 -----  
AmelOr28 -----  
AmelOr33 -----  
AmelOr34 -----  
AmelOr32 -----  
AmelOr31 -----  
AmelOr36 -----

AmelOr37 -----  
AmelOr38 -----  
AmelOr39 -----  
AmelOr47 -----  
AmelOr48 -----  
AmelOr40 -----  
AmelOr43 -----  
AmelOr45 -----  
AmelOr41 -----  
AmelOr42 -----  
AmelOr44 -----  
AmelOr46 -----  
AmelOr49 -----  
AmelOr50 -----  
AmelOr26 -----  
AmelOr53 -----  
AmelOr54 -----  
AmelOr52 -----  
AmelOr51 -----  
AmelOr55 -----  
AmelOr57 -----  
AmelOr56 -----  
AmelOr58 -----  
AmelOr59 -----  
AmelOr60 -----  
AmelOr61 -----  
AmelOr63 -----  
AmelOr64 -----  
AmelOr66 -----  
AmelOr65 -----  
AmelOr67 -----  
AmelOr114 -----  
AmelOr115 -----  
AmelOr118 -----  
AmelOr164 -----  
AmelOr163 -----  
AmelOr165 -----  
AmelOr166 -----  
AmelOr167 -----  
DmelOr35a -----  
DmelOr74a -----  
AgamOr3 -----  
AgamOr5 -----  
AgamOr13 -----  
AgamOr15 -----  
AgamOr17 -----  
AgamOr16 -----  
AgamOr55 -----  
AgamOr18 -----  
AgamOr14 -----  
AgamOr51 -----  
AgamOr12 -----  
AgamOr19 -----  
AgamOr20 -----  
AgamOr21 -----  
AgamOr50 -----  
AgamOr29 -----  
AgamOr53 -----  
AgamOr30 -----  
AgamOr46 -----  
AgamOr47 -----  
AgamOr48 -----  
AgamOr49 -----  
AgamOr61 -----  
AgamOr62 -----  
AgamOr63 -----  
AgamOr60 -----  
AgamOr75 -----  
AgamOr76 -----  
AgamOr78 -----

AgamOr77 -----  
AgamOr79 -----  
AmelOr99 -----  
AmelOr101 -----  
AmelOr102 -----  
AmelOr103 -----  
AmelOr104 -----  
AmelOr98 -----  
AmelOr100 -----  
AmelOr97 -----  
AmelOr105 -----  
AmelOr109 -----  
AmelOr110 -----  
AmelOr111 -----  
AmelOr108 -----  
AmelOr107 -----  
AmelOr112 -----  
AmelOr113 -----  
AmelOr106 -----  
AmelOr122 -----  
AmelOr125 -----  
AmelOr123 -----  
AmelOr126 -----  
AmelOr127 -----  
AmelOr128 -----  
AmelOr129 -----  
AmelOr133 -----  
AmelOr134 -----  
AmelOr131 -----  
AmelOr132 -----  
AmelOr135 -----  
AmelOr136 -----  
AmelOr138 -----  
AmelOr130 -----  
AmelOr137 -----  
AmelOr139 -----  
BmorOr20 -----  
BmorOr3 -----  
BmorOr18 -----  
HvirOr6 -----  
BmorOr23 -----  
BmorOr16 -----  
BmorOr4 -----  
BmorOr5 -----  
BmorOr22 -----  
BmorOr17 -----  
BmorOr1 -----  
BmorOr1a -----  
BmorOr1b -----  
BmorOr19 -----  
BmorOr15 -----  
TcasOr5 -----  
TcasOr7 -----  
HvirOr4 -----  
BmorOr13 -----  
DmelOr10a -----  
DmelOr33c -----  
DmelOr7a -----  
DmelOr22c -----  
AgamOr1 -----  
AgamOr4 -----  
DmelOr47b -----  
AmelOr73 -----  
AgamOr68 -----  
DmelOr59a -----  
DmelOr23a -----  
AgamOr31 -----  
DmelOr2a -----  
AmelOr62 -----  
AmelOr121 -----

AmelOr140 -----  
TcasOr12 -----  
AgamOr8 -----  
BmorOr9 -----  
AgamOr40 -----  
TcasOr63 -----  
TcasOr4 -----  
TcasOr13 -----  
AgamOr24 -----  
AgamOr54 -----  
AgamOr23 -----  
AgamOr64 -----  
DmelOr82a -----  
AmelOr116 -----  
AmelOr160 -----  
TcasOr10 -----  
TcasOr26 -----  
AmelOr117 -----  
AmelOr120 -----  
BmorOr7 -----  
AgamOr6 -----  
DmelOr45a -----  
DmelOr67d -----  
DmelOr83c -----  
AmelOr162 -----  
HvirOr3 -----  
TcasOr20 -----  
AgamOr11 -----  
DmelOr56a -----  
AgamOr28 -----  
AgamOr58 -----  
AgamOr59 -----  
DmelOr1a -----  
DmelOr13a -----  
AmelOr161 -----  
AmelOr141 -----  
AgamOr52 -----  
AgamOr36 -----  
AgamOr25 -----  
AgamOr45 -----  
TcasOr3 -----  
DmelOr88a -----  
AgamOr22 -----  
DmelOr49a -----  
DmelOr85f -----  
AmelOr119 -----  
DmelOr63a -----  
DmelOr67b -----  
BmorOr21 -----  
BmorOr11 -----  
BmorOr12 -----  
AgamOr33 -----  
HvirOr1 -----  
HvirOr5 -----  
TcasOr1 -----  
TcasOr2 -----

TcasOr16 -----  
AmelOr2 -----  
AgamOr7 -----  
AaegOr7 -----  
DmelOr83b -----  
BmorOr2 -----  
BmorOr2a -----  
HvirOr2 -----  
AgamOr56 -----  
AgamOr57 -----  
AgamOr26 -----  
AgamOr27 -----

|           |                                                  |     |
|-----------|--------------------------------------------------|-----|
| HvirOr9   | -----                                            |     |
| HvirOr7   | -----                                            |     |
| DmelOr85b | -----                                            |     |
| DmelOr85c | -----                                            |     |
| DmelOr85d | -----                                            |     |
| DmelOr67a | -----                                            |     |
| DmelOr67c | -----                                            |     |
| DmelOr92a | -----                                            |     |
| DmelOr69a | -----                                            |     |
| DmelOr69b | -----                                            |     |
| TcasOr6   | -----                                            |     |
| TcasOr11  | -----                                            |     |
| AgamOr41  | -----                                            |     |
| AgamOr42  | -----                                            |     |
| AgamOr43  | -----                                            |     |
| AgamOr44  | -----                                            |     |
| AgamOr66  | -----                                            |     |
| AgamOr67  | -----                                            |     |
| AgamOr72  | -----                                            |     |
| AgamOr73  | -----                                            |     |
| AgamOr71  | -----                                            |     |
| AgamOr74  | -----                                            |     |
| AgamOr70  | -----                                            |     |
| AgamOr69  | -----                                            |     |
| TcasOr9   | -----                                            |     |
| TcasOr18  | -----                                            |     |
| DmelOr83a | -----                                            |     |
| DmelOr85e | -----                                            |     |
| TcasOr24  | -----                                            |     |
| TcasOr25  | VDRIYQRSLSFVHVLFSGLVFGIMGFSILTVGISVKTLTCRRKGFMMG | 791 |
| TcasOr19  | -----                                            |     |
| TcasOr22  | -----                                            |     |
| TcasOr23  | -----                                            |     |
| AmelOr168 | -----                                            |     |
| AmelOr170 | -----                                            |     |
| AmelOr169 | -----                                            |     |
| DmelOr65b | -----                                            |     |
| DmelOr65c | -----                                            |     |
| DmelOr65a | -----                                            |     |
| TcasOr17  | -----                                            |     |
| TcasOr21  | -----                                            |     |
| TcasOr56  | -----                                            |     |
| TcasOr15  | -----                                            |     |
| AgamOr9   | -----                                            |     |
| AgamOr65  | -----                                            |     |
| BmorOr6   | -----                                            |     |
| BmorOr10  | -----                                            |     |
| AgamOr34  | -----                                            |     |
| AgamOr37  | -----                                            |     |
| DmelOr94a | -----                                            |     |
| DmelOr94b | -----                                            |     |
| DmelOr71a | -----                                            |     |
| DmelOr46a | -----                                            |     |
| DmelOr46b | -----                                            |     |
| HvirOr8   | -----                                            |     |
| BmorOr8   | -----                                            |     |
| AmelOr68  | -----                                            |     |
| AmelOr69  | -----                                            |     |
| AmelOr70  | -----                                            |     |
| AmelOr71  | -----                                            |     |
| AmelOr72  | -----                                            |     |
| DmelOr19a | -----                                            |     |
| DmelOr19b | -----                                            |     |
| DmelOr33a | -----                                            |     |
| DmelOr33b | -----                                            |     |
| DmelOr22a | -----                                            |     |
| DmelOr22b | -----                                            |     |
| DmelOr42b | -----                                            |     |
| DmelOr59b | -----                                            |     |
| DmelOr59c | -----                                            |     |

Dme1Or98a -----  
Dme1Or42a -----  
Dme1Or85a -----  
Dme1Or43b -----  
AgamOr2 -----  
AgamOr10 -----  
Dme1Or30a -----  
Dme1Or49b -----  
Dme1Or43a -----  
AgamOr32 -----  
AgamOr35 -----  
Dme1Or47a -----  
Dme1Or98b -----  
Dme1Or9a -----  
AgamOr38 -----  
AgamOr39 -----  
Dme1Or24a -----  
Dme1Or45b -----  
Ame1Or74 -----  
Ame1Or86 -----  
Ame1Or75 -----  
Ame1Or84 -----  
Ame1Or87 -----  
Ame1Or76 -----  
Ame1Or85 -----  
Ame1Or88 -----  
Ame1Or91 -----  
Ame1Or92 -----  
Ame1Or95 -----  
Ame1Or93 -----  
Ame1Or77 -----  
Ame1Or94 -----  
Ame1Or96 -----  
Ame1Or79 -----  
Ame1Or83 -----  
Ame1Or80 -----  
Ame1Or81 -----  
Ame1Or82 -----  
Ame1Or78 -----  
Ame1Or89 -----  
Ame1Or90 -----  
Ame1Or142 -----  
Ame1Or146 -----  
Ame1Or148 -----  
Ame1Or158 -----  
Ame1Or147 -----  
Ame1Or150 -----  
Ame1Or151 -----  
Ame1Or152 -----  
Ame1Or154 -----  
Ame1Or155 -----  
Ame1Or157 -----  
Ame1Or156 -----  
Ame1Or153 -----  
Ame1Or144 -----  
Ame1Or145 -----  
Ame1Or143 -----  
Ame1Or1 -----  
Ame1Or3 -----  
Ame1Or6 -----  
Ame1Or7 -----  
Ame1Or4 -----  
Ame1Or5 -----  
Ame1Or8 -----  
Ame1Or9 -----  
Ame1Or11 -----  
Ame1Or12 -----  
Ame1Or10 -----  
Ame1Or14 -----  
Ame1Or15 -----



AmelOr13 -----  
AmelOr16 -----  
AmelOr17 -----  
AmelOr18 -----  
AmelOr19 -----  
AmelOr22 -----  
AmelOr24 -----  
AmelOr20 -----  
AmelOr25 -----  
AmelOr29 -----  
AmelOr30 -----  
AmelOr21 -----  
AmelOr23 -----  
AmelOr35 -----  
AmelOr27 -----  
AmelOr28 -----  
AmelOr33 -----  
AmelOr34 -----  
AmelOr32 -----  
AmelOr31 -----  
AmelOr36 -----  
AmelOr37 -----  
AmelOr38 -----  
AmelOr39 -----  
AmelOr47 -----  
AmelOr48 -----  
AmelOr40 -----  
AmelOr43 -----  
AmelOr45 -----  
AmelOr41 -----  
AmelOr42 -----  
AmelOr44 -----  
AmelOr46 -----  
AmelOr49 -----  
AmelOr50 -----  
AmelOr26 -----  
AmelOr53 -----  
AmelOr54 -----  
AmelOr52 -----  
AmelOr51 -----  
AmelOr55 -----  
AmelOr57 -----  
AmelOr56 -----  
AmelOr58 -----  
AmelOr59 -----  
AmelOr60 -----  
AmelOr61 -----  
AmelOr63 -----  
AmelOr64 -----  
AmelOr66 -----  
AmelOr65 -----  
AmelOr67 -----  
AmelOr114 -----  
AmelOr115 -----  
AmelOr118 -----  
AmelOr164 -----  
AmelOr163 -----  
AmelOr165 -----  
AmelOr166 -----  
AmelOr167 -----  
DmelOr35a -----  
DmelOr74a -----  
AgamOr3 -----  
AgamOr5 -----  
AgamOr13 -----  
AgamOr15 -----  
AgamOr17 -----  
AgamOr16 -----  
AgamOr55 -----  
AgamOr18 -----

AgamOr14 -----  
AgamOr51 -----  
AgamOr12 -----  
AgamOr19 -----  
AgamOr20 -----  
AgamOr21 -----  
AgamOr50 -----  
AgamOr29 -----  
AgamOr53 -----  
AgamOr30 -----  
AgamOr46 -----  
AgamOr47 -----  
AgamOr48 -----  
AgamOr49 -----  
AgamOr61 -----  
AgamOr62 -----  
AgamOr63 -----  
AgamOr60 -----  
AgamOr75 -----  
AgamOr76 -----  
AgamOr78 -----  
AgamOr77 -----  
AgamOr79 -----  
AmelOr99 -----  
AmelOr101 -----  
AmelOr102 -----  
AmelOr103 -----  
AmelOr104 -----  
AmelOr98 -----  
AmelOr100 -----  
AmelOr97 -----  
AmelOr105 -----  
AmelOr109 -----  
AmelOr110 -----  
AmelOr111 -----  
AmelOr108 -----  
AmelOr107 -----  
AmelOr112 -----  
AmelOr113 -----  
AmelOr106 -----  
AmelOr122 -----  
AmelOr125 -----  
AmelOr123 -----  
AmelOr126 -----  
AmelOr127 -----  
AmelOr128 -----  
AmelOr129 -----  
AmelOr133 -----  
AmelOr134 -----  
AmelOr131 -----  
AmelOr132 -----  
AmelOr135 -----  
AmelOr136 -----  
AmelOr138 -----  
AmelOr130 -----  
AmelOr137 -----  
AmelOr139 -----  
BmorOr20 -----  
BmorOr3 -----  
BmorOr18 -----  
HvirOr6 -----  
BmorOr23 -----  
BmorOr16 -----  
BmorOr4 -----  
BmorOr5 -----  
BmorOr22 -----  
BmorOr17 -----  
BmorOr1 -----  
BmorOr1a -----  
BmorOr1b -----

BmorOr19 -----  
BmorOr15 -----  
TcasOr5 -----  
TcasOr7 -----  
HvirOr4 -----  
BmorOr13 -----  
DmelOr10a -----  
DmelOr33c -----  
DmelOr7a -----  
DmelOr22c -----  
AgamOr1 -----  
AgamOr4 -----  
DmelOr47b -----  
AmelOr73 -----  
AgamOr68 -----  
DmelOr59a -----  
DmelOr23a -----  
AgamOr31 -----  
DmelOr2a -----  
AmelOr62 -----  
AmelOr121 -----  
AmelOr140 -----  
TcasOr12 -----  
AgamOr8 -----  
BmorOr9 -----  
AgamOr40 -----  
TcasOr63 -----  
TcasOr4 -----  
TcasOr13 -----  
AgamOr24 -----  
AgamOr54 -----  
AgamOr23 -----  
AgamOr64 -----  
DmelOr82a -----  
AmelOr116 -----  
AmelOr160 -----  
TcasOr10 -----  
TcasOr26 -----  
AmelOr117 -----  
AmelOr120 -----  
BmorOr7 -----  
AgamOr6 -----  
DmelOr45a -----  
DmelOr67d -----  
DmelOr83c -----  
AmelOr162 -----  
HvirOr3 -----  
TcasOr20 -----  
AgamOr11 -----  
DmelOr56a -----  
AgamOr28 -----  
AgamOr58 -----  
AgamOr59 -----  
DmelOr1a -----  
DmelOr13a -----  
AmelOr161 -----  
AmelOr141 -----  
AgamOr52 -----  
AgamOr36 -----  
AgamOr25 -----  
AgamOr45 -----  
TcasOr3 -----  
DmelOr88a -----  
AgamOr22 -----  
DmelOr49a -----  
DmelOr85f -----  
AmelOr119 -----  
DmelOr63a -----  
DmelOr67b -----  
BmorOr21 -----

|          |       |
|----------|-------|
| BmorOr11 | ----- |
| BmorOr12 | ----- |
| AgamOr33 | ----- |
| HvirOr1  | ----- |
| HvirOr5  | ----- |
| TcasOr1  | ----- |
| TcasOr2  | ----- |

**Figure S1.**
