# Supplementary material for: A Family of Chemoreceptors in Tribolium castaneum (Tenebrionidae: Coleoptera)
Source: PubMed Central journal article supplement (PMC2121604; doi:10.1371/journal.pone.0001319), 2007-12-19
Supplement: pone.0001319.s004.pdf [file pone.0001319.s004.pdf]

TcasGr10 HEIIDFSLQILNERAEFNAAAGFFPIIDYTLVFSV 33  
TcasGr2 LFNGKALIFQISNLQTTGGTFFGDTFFILLISM 33  
TcasGr38 HDIIDFSLQIANEQVEFNAAAGFFPINYTLVFSV 33  
TcasGr5 HFTAA-RFFDLNRKTIILGVLNALTFFLVYV 32  
TcasGr6 PKVSLKGYTYVNRRELVTASVATAIYFLVLIQ 33  
TcasGr7 VAFTEKNGFSTRGLILSLAGASYEFLVLMQ 33  
TcasGr104 YHHTA-NYFEINKATLCGLFGTTTTYFLVLIQ 33  
TcasGr1 PIMNNGYANVNRKLISSVTTSATYLVMLMQ 33  
TcasGr12 FPFVSCDYFTIETKTVLDVVGVTTYLVLIQ 33  
TcasGr13 FPFVSCDYFTIETKTVLDVVGVTTYLVLIQ 33  
TcasGr14 LQFTAKDFFNLDWTFCHMMIAALTTYLVLIQ 33  
TcasGr15 RKPSFVIOFESHIPVDNIEFAGALVTEYELT 33  
TcasGr16 LEITACKFFSIDNALLSLICGASSSYLFLMIQ 33  
TcasGr150 LEITACKRFLNIDNALLFAICGASSSYLFLMIQ 33  
TcasGr19 THFYCSFLYPLKSTFYLNVVRPERPSMGITPM 33  
TcasGr20 IKFSSFGMLKISRSLTSLTSGGALTTFLVLI 33  
TcasGr21 ACEVM-ALVWITSETCEEIVAGVTTYLVLIQ 32  
TcasGr22 LEITACKRFLNIDNALLSLICGASSSYLFLMIQ 33  
TcasGr79 PTFSA--FYGIDRSTFLGLVGVATFLVLIQ 31  
TcasGr123 VEFNAAAGFAINYLTVFSLGGVTTYLVLIQ 33  
TcasGr25 ARKNAGRAEPVFDGKVPNSGLNQISSDIDVNF 33  
TcasGr26 PKVSLKGYTYVNRRELVTASVATAIYFLVLIQ 33  
TcasGr27 PIVFYVAIFSLDITFKKMQKAWSTALKNM 33  
TcasGr28 TLYSG-DEMYFR-VAFPSVFTIDYSLWKAC 33  
TcasGr29 VAFTEKNGFSTRGLILSLAGASYEFLVLMQ 33  
TcasGr30 VAFTEKNGFSTRGLILSLAGASYEFLVLMQ 33  
TcasGr32 VAHTAARFFAINRSTILFRMFNAITFLVLIQ 33  
TcasGr47 VKITTAADFFILDKSTILKVLDTVAFLVMVQ 33  
TcasGr34 PKFTAGGFFHVKKSTLFSILNTVSTLFLVMVQ 33  
TcasGr35 PEFKA--FFSIDRSTLFSVLNSLTTFLVMIQ 31  
TcasGr105 AQITAAANFFDISRSTFLGLATITTYFLVMI 33  
TcasGr37 PVFAAARFFAINRSTILFRMFNAITFLVMIQ 33  
TcasGr3 TDILSLVGGFFDVNRNFKSLLATMTTYLVLIQ 33  
TcasGr39 PIMNNGYANVNRKLISSVTTSATYLVMLMQ 33  
TcasGr40 TCSQI--PSEVEDK-YTTYFLNTXPHLENF 30  
TcasGr41 VAFKV-GFLNIDYGTLYSLFGSTAMNVLLQ 32  
TcasGr71 PDFSAAGFFSINRSTLLQLIGNVTFFLVLIQ 33  
TcasGr43 PKFSAANFFDIERSTILSLVGTACTFLVLIQ 33  
TcasGr45 YHHTA-NYFEINKATLCGLFGTTTTYFLVLIQ 33  
TcasGr46 HEIIDAGFFPIIDYTLVFSKFTSSRLMLIQ 32  
TcasGr33 PKVSLKGYTYVNRRELVTASVATAIYFLVLIQ 33  
TcasGr48 VVFTAHEHFFSVKCSILFPVAGHSDFCDINS 33  
TcasGr49 LQFTAKDFFNLDWTFCHMVSCHKVNYINQFEAN 33  
TcasGr50 YSVNKLIFRSDPKNVTLELCGMSTYLVMIQ 33  
TcasGr51 RTFSA-GFFDIRKKNLIFSLIANAMVYVSVQ 32  
TcasGr54 PRFFAARFFVINRGTILGLDVAITFLVMIQ 33  
TcasGr62 VEFNAAAGFAINYLTVFSLGGVTTYLVLIQ 33  
TcasGr52 AKFTAADFFEDRGTFFFGILSTTTSYFLMIQ 33  
TcasGr125 VQFSVLGGFFVVVDYTLVSLVGVATFLVLIQ 33  
TcasGr57 TSRTSAGFFPVDRSTLGLLATITTYLVLIQ 33  
TcasGr98 ANFTAAAGFFDVKSTLFGILATITTYLVLIQ 33  
TcasGr59 ARKNAGRAEPVFDGKVPNSGLNQISSDIDVNF 33  
TcasGr60 TTCDIATILDFWRCVLSHCAAAGGSANIMSG 33  
TcasGr61 PTFTALGLFPINRSTIFRMFNAITFLVLIQ 33  
TcasGr53 PVFAAARFFAINRSTILFRMFNAITFLVLIQ 28  
AgamGr1 PKFRIL-KSLNLSFNLIYASCGLVATYLVLIQ 33  
AgamGr2 LNSACGFDDDMTTLIYATGATSLLVLIQ 32  
AgamGr3 IKLTAKDFFDYDYLRTLVIVLFI 33  
AgamGr4 IRLTAHGLFEINYSLLKMGTTMIFIT 33  
AgamGr5 IQLTA-DFFDLNFSPLITLIFSVGAYLSFIQ 32  
AgamGr6 INFSAAANFFDIRLSSLTTIFGSSITSYLVLIQ 33  
AgamGr7 MSFSL-GFFDMDFVLLKELAAAITYLVLIQ 32  
AgamGr8 PFTMTLSMYRLDYGTLMQVVKITTYVLIQ 33  
AgamGr9a KKFSAACGFFDIDNTVIYMFSSITTYLVLIQ 33  
AgamGr9b KKFSAACGFFDIDNTVIYMFSSITTYLVLIQ 33  
AgamGr9c KKFSAACGFFDIDNTVIYMFSSITTYLVLIQ 33  
AgamGr9d KKFSAACGFFDIDNTVIYMFSSITTYLVLIQ 33  
AgamGr9e KKFSAACGFFDIDNTVIYMFSSITTYLVLIQ 33  
AgamGr9f KKFSAACGFFDIDNTVIYMFSSITTYLVLIQ 33  
AgamGr9g KKFSAACGFFDIDNTVIYMFSSITTYLVLIQ 33  
AgamGr9h KKFSAACGFFDIDNTVIYMFSSITTYLVLIQ 33  
AgamGr9i KKFSAACGFFDIDNTVIYMFSSITTYLVLIQ 33  
AgamGr9j KKFSAACGFFDIDNTVIYMFSSITTYLVLIQ 33  
AgamGr9k KKFSAACGFFDIDNTVIYMFSSITTYLVLIQ 33  
AgamGr9l KKFSAACGFFDIDNTVIYMFSSITTYLVLIQ 33  
AgamGr9m KKFSAACGFFDIDNTVIYMFSSITTYLVLIQ 33  
AgamGr9n KKFSAACGFFDIDNTVIYMFSSITTYLVLIQ 33  
AgamGr10 KKFSAACGFFDIDNTVIYMFSSITTYLVLIQ 33  
AgamGr11 INFSACGMFDIDYAMHMLSSITTYLVLIQ 33  
AgamGr12 NQQRFF-GFLVDNFKLVCTALTSMTTYLVLIQ 32  
AgamGr13 LKINI-GMFTMDFELLTGMAAITNFVLLMQ 32  
AgamGr15 VALTGKFFSMTRQLVLNVGTAITTYELVLIQ 33  
AgamGr16 VALNGYGFYLRKLRKILKLAATVTYELVLIQ 33  
AgamGr17 NCLSGHGFFLNRSVILAMAGTLTYELVLMKE 33  
AgamGr18 NVLSGKQFFFLKRLILAMAGTLTYELVLLD 33  
AgamGr19 IAINAMGLFRLTKKTMMLGAVTYELVLMHF 33  
AgamGr20 VSLSGMGFFITRRRFLTMAGSLTYELVLMRF 33  
AgamGr21 VALSGMGFFSLTRQLLFSMAGTLTYELVLMKE 33  
AgamGr22 PTMNLDGYANINRGLITSNISMATYLVLMQ 33  
AgamGr23 AIVSLKGYAEVNRRELVTSIATAIYLVLIQ 33  
AgamGr24 SSINLGGFFDVNRTEFKSLATMTYLVLIQ 33  
AgamGr25 ESFTAAGLCTDRRLITSLXCGALTYLVLIQ 33  
AgamGr26 GPQTAAGLVNLEMTLITSTMVGAITTYLVLIQ 33  
AgamGr27 GKRHHCGLLTDLTLISLIVAGLTTYLVMIQ 33  
AgamGr28 KRIVPCGGLKLESSLSSIFVALSFMVLIQ 33  
AgamGr29 TLFLEYGMISIDMTLILSNVGGELTYLVLIQ 33  
AgamGr30 DTHQAAGMLKLDMLVLPNVIAGITSYLVLIQ 33  
AgamGr31 TLFLEYSMISIDMTLILSNVAGLTYLVLIQ 33  
AgamGr32b NQKAL-MLYRILKRCVSELENAEHFISQISNL 32  
AgamGr33 LHRKVACGLFSLDFSLIFTLVGAATTYLVLIQ 33  
AgamGr34 KVFKFAAGFFQIYCNMLCGMIGAITTYLVLIQ 33  
AgamGr35 VRFSAAGFFITINYNMLSGLVAGMTTYLVLIQ 33  
AgamGr36 PKLRCIFFYADWKTLYNMGEVYTYLVLIQ 33  
AgamGr37a PVIKGLFVYDWTWYTMGATATYLVLIQ 33  
AgamGr37b PVIKGLFVYDWTWYTMGATATYLVLIQ 33  
AgamGr37c PVIKGLFVYDWTWYTMGATATYLVLIQ 33  
AgamGr37d PVIKGLFVYDWTWYTMGATATYLVLIQ 33  
AgamGr37e PVIKGLFVYDWTWYTMGATATYLVLIQ 33  
AgamGr37f PVIKGLFVYDWTWYTMGATATYLVLIQ 33  
AgamGr38 PMITCGLFFFDWTLIFSLSTAAITYLVLIQ 33  
AgamGr39 PKASC-FYDLDWTFLLSMSSPATYLVLIQ 32  
AgamGr40 PRVSCGLFDFEWPVLSVAAITLVLMHVLIQ 33

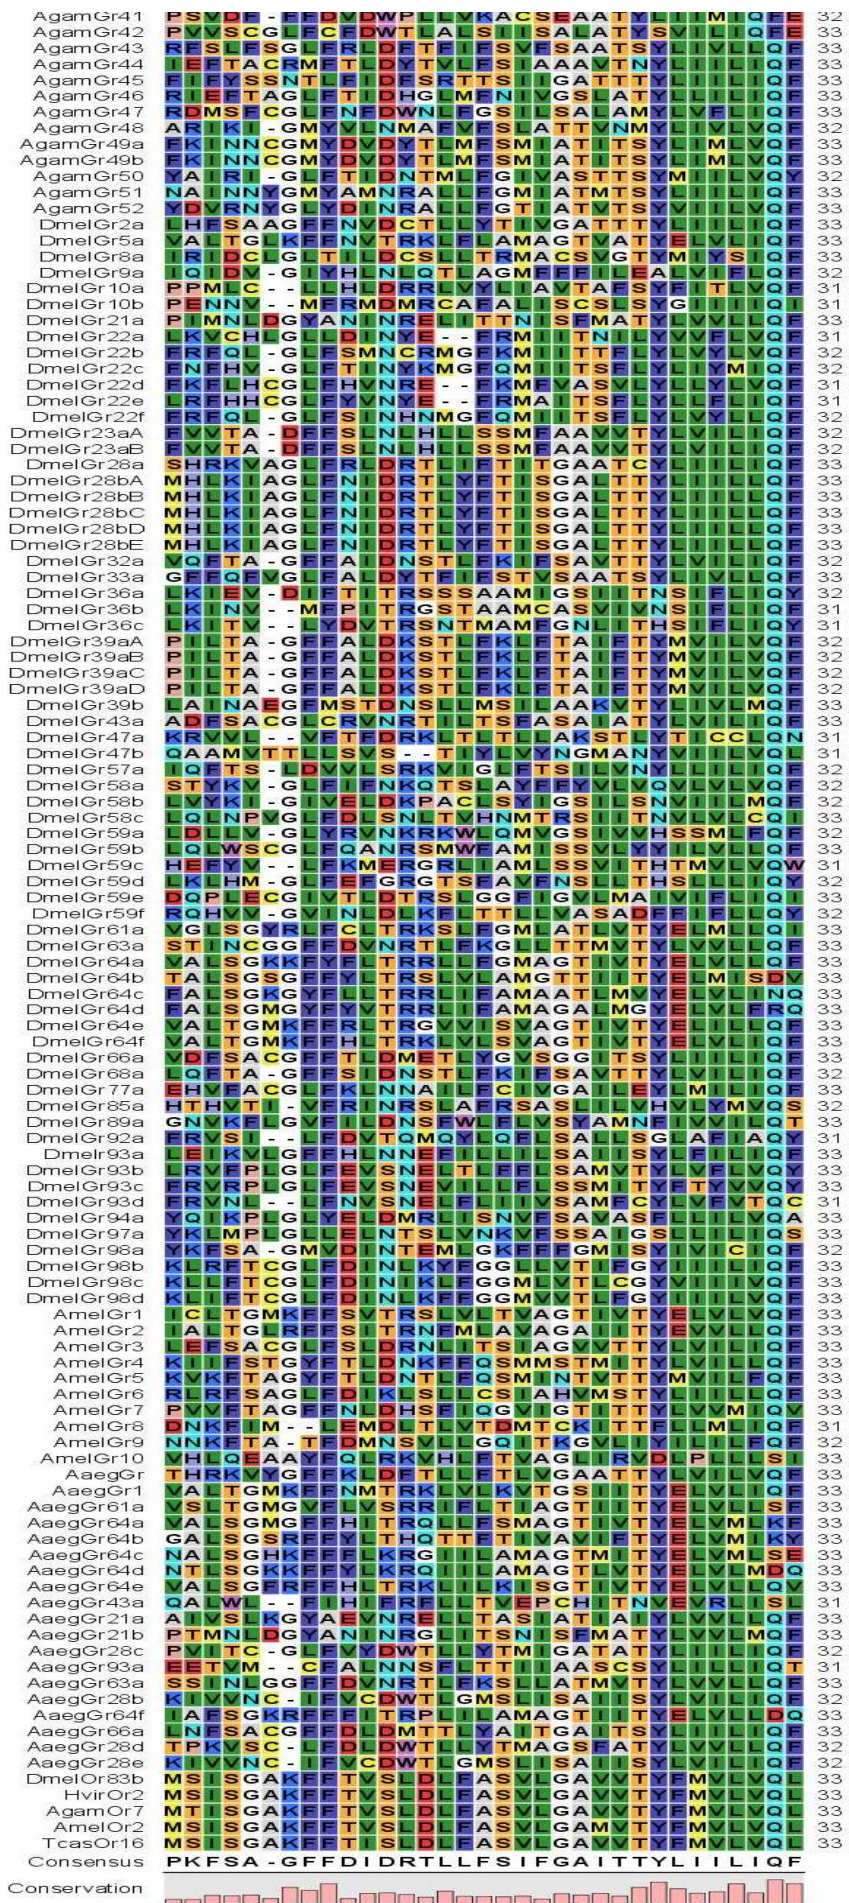

Figure S2.
