# Supplementary material for: A Family of Chemoreceptors in Tribolium castaneum (Tenebrionidae: Coleoptera)
Source: PubMed Central journal article supplement (PMC2121604; doi:10.1371/journal.pone.0001319), 2007-12-19
Supplement: pone.0001319.s006.pdf [file pone.0001319.s006.pdf]

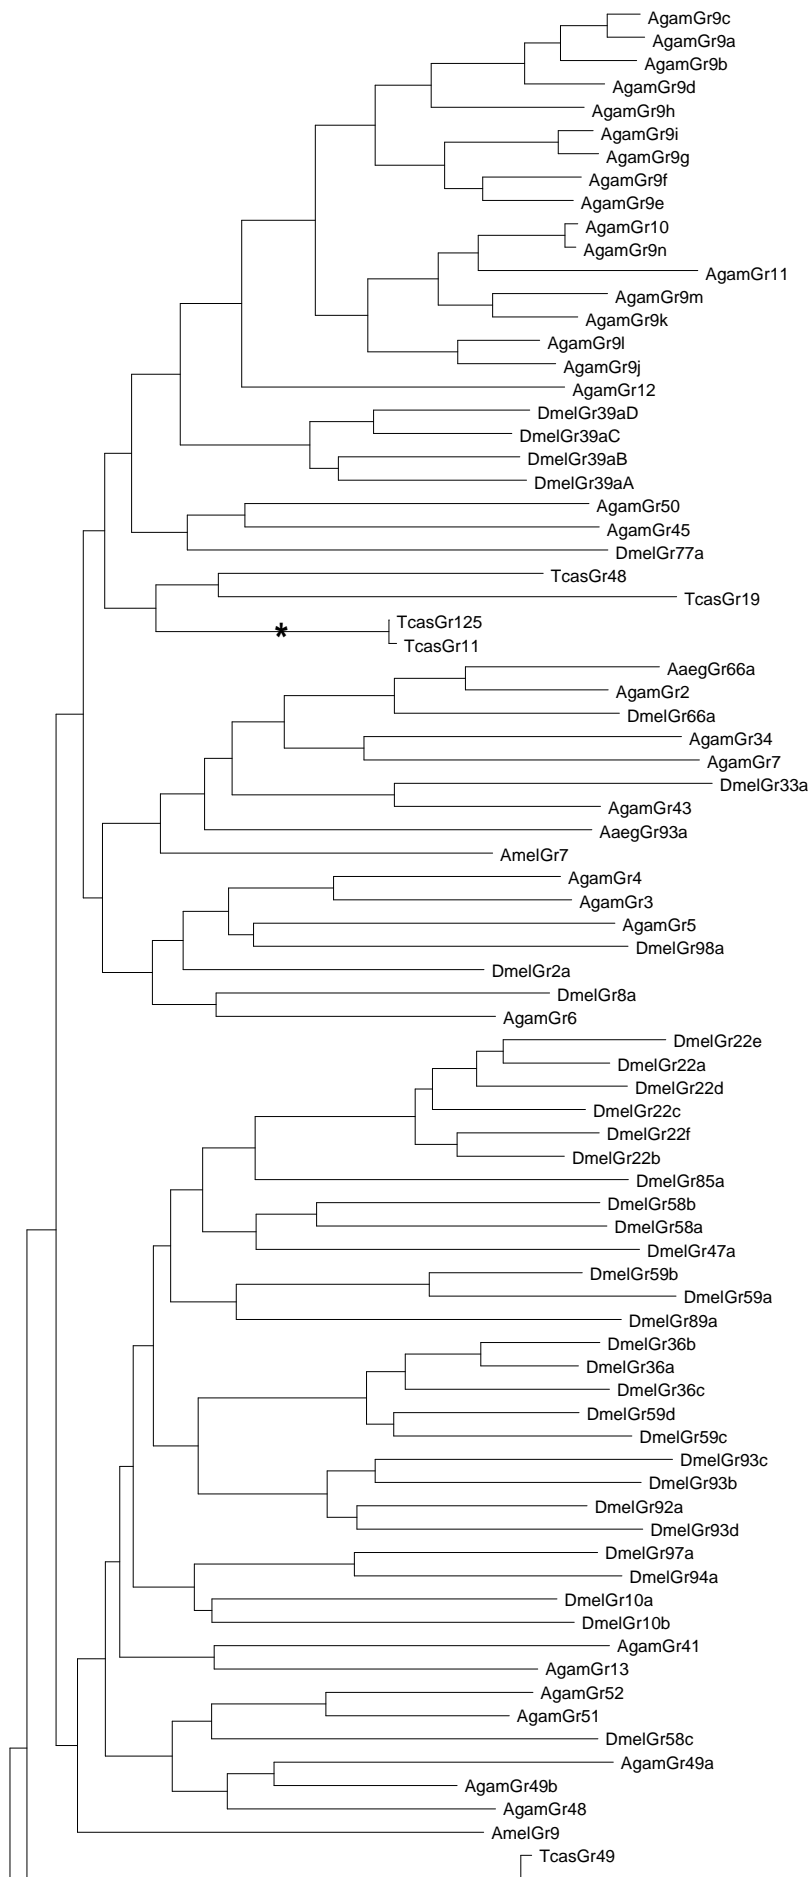

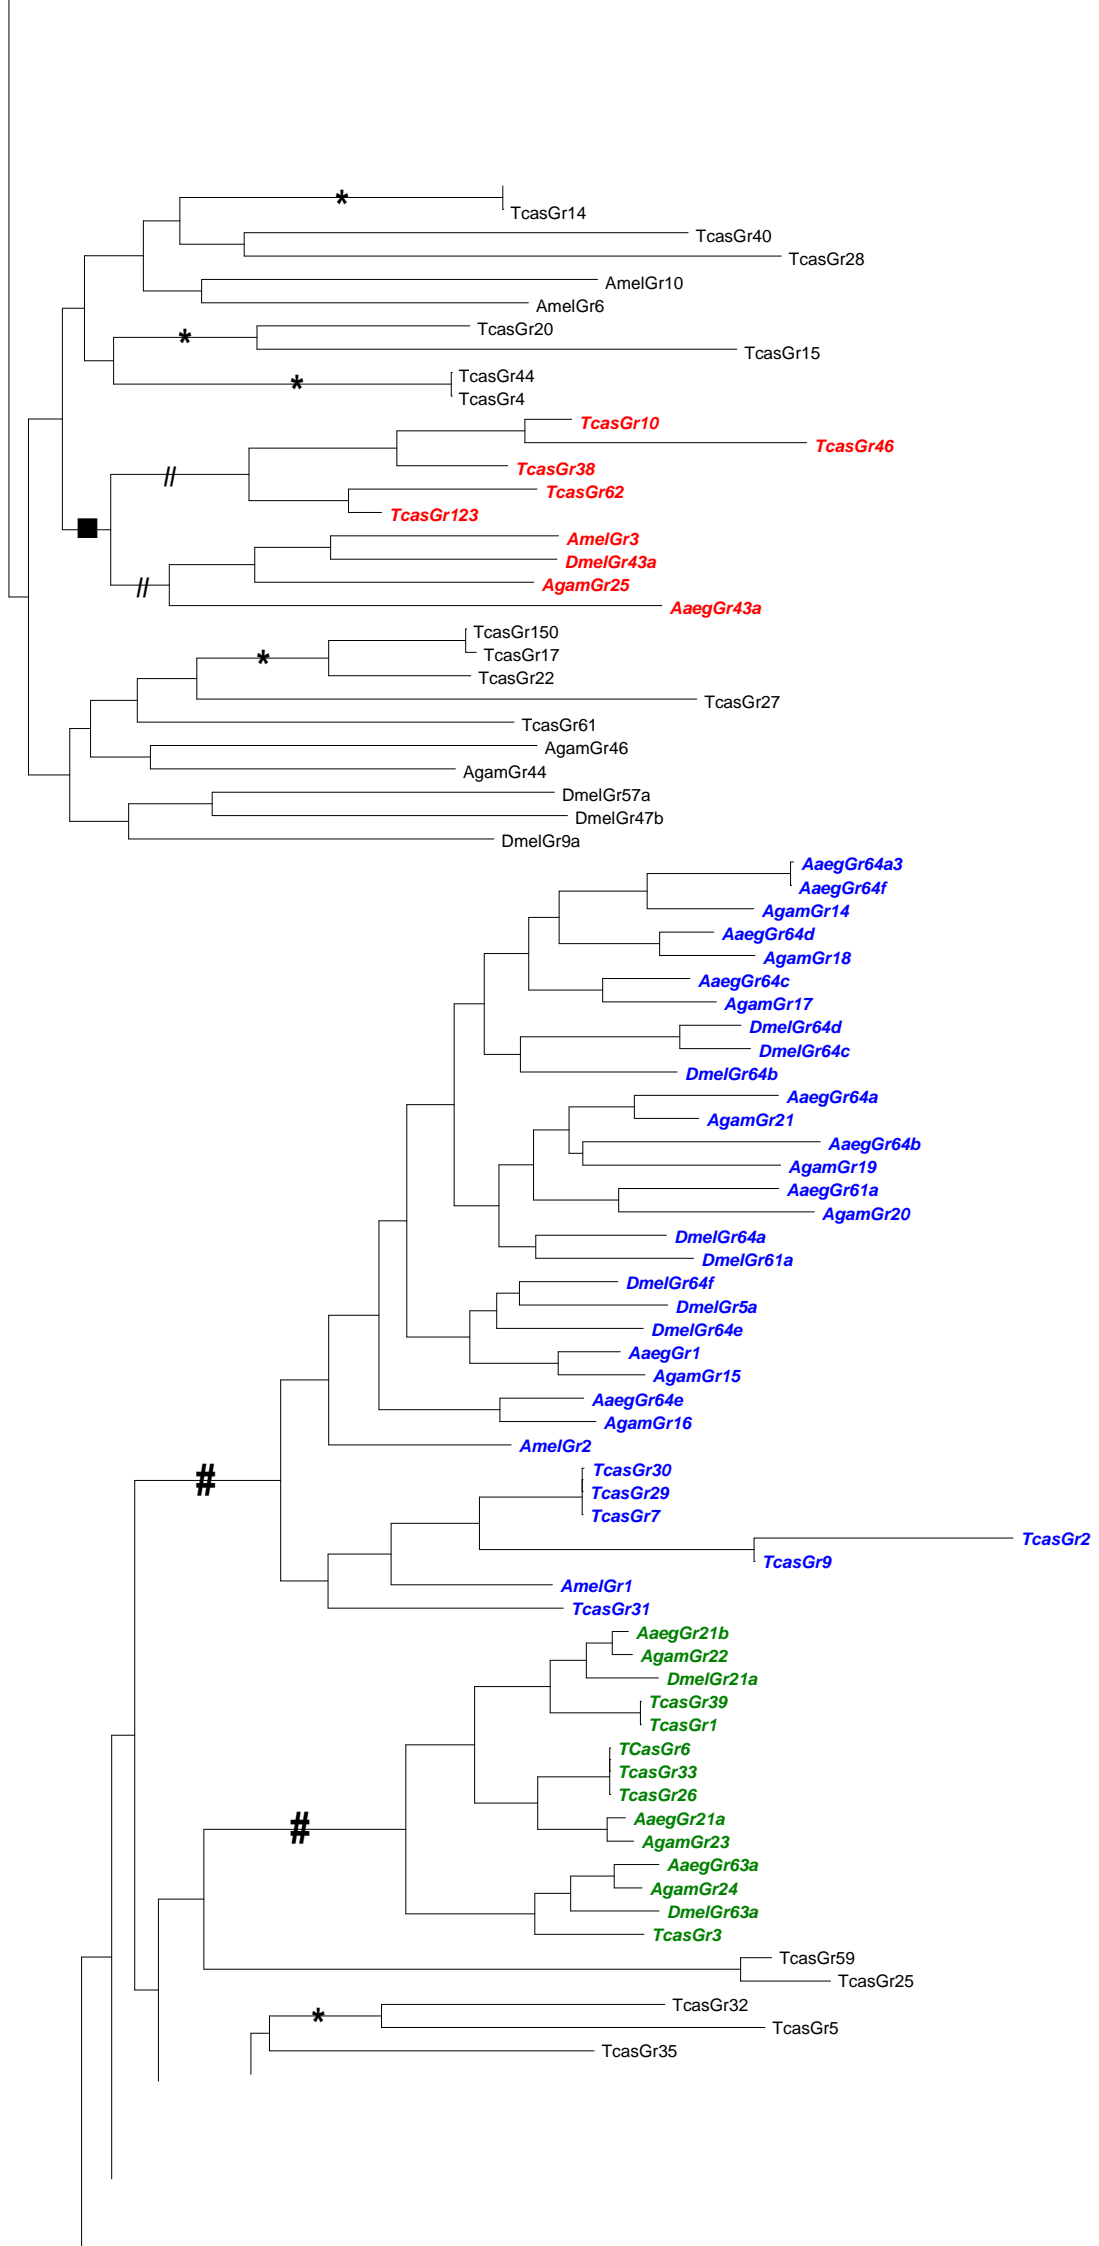

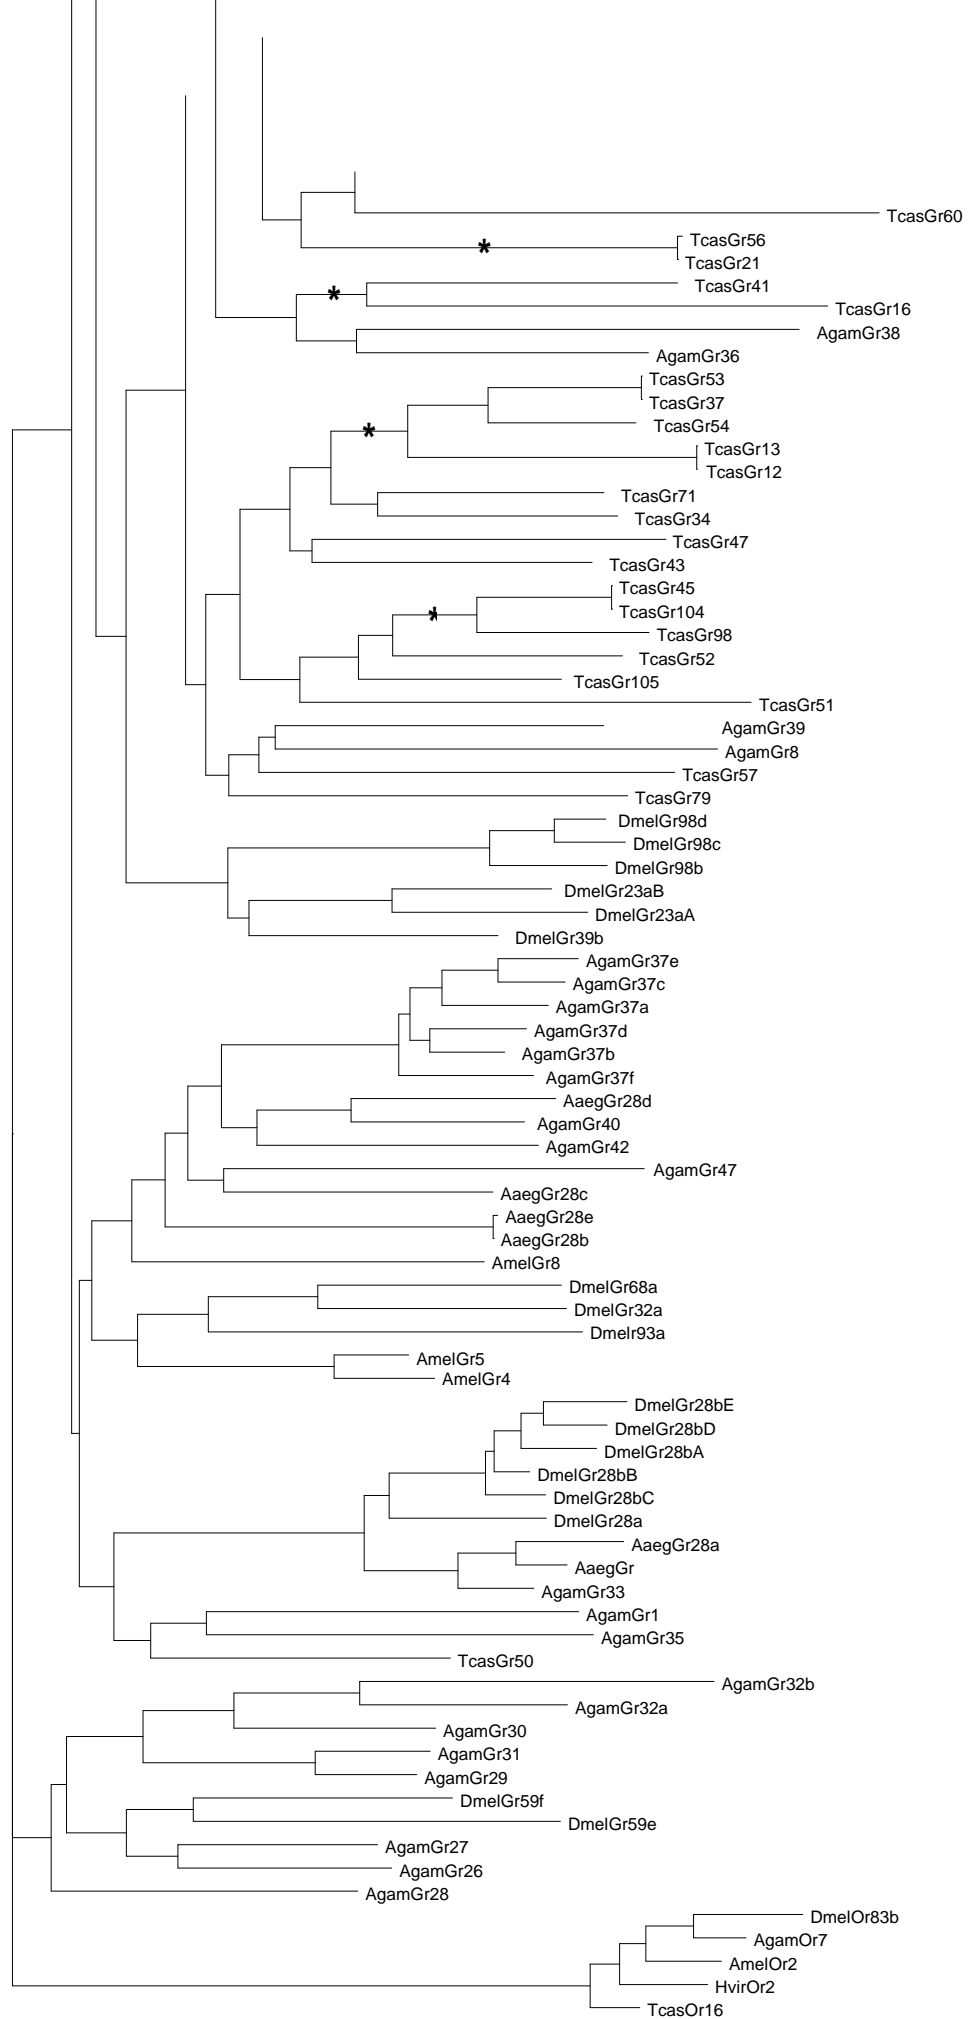

Figure S4.
