# Supplementary material for: A Family of Chemoreceptors in Tribolium castaneum (Tenebrionidae: Coleoptera)
Source: PubMed Central journal article supplement (PMC2121604; doi:10.1371/journal.pone.0001319), 2007-12-19
Supplement: pone.0001319.s008.pdf [file pone.0001319.s008.pdf]

***TcasGr11***

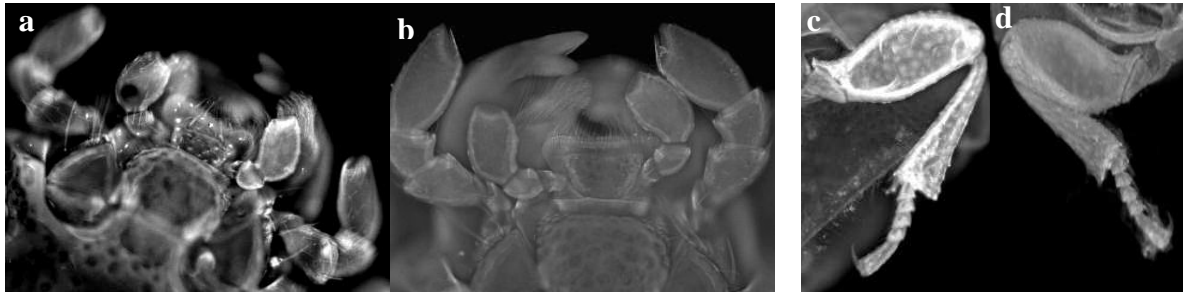

***TcasGr12***

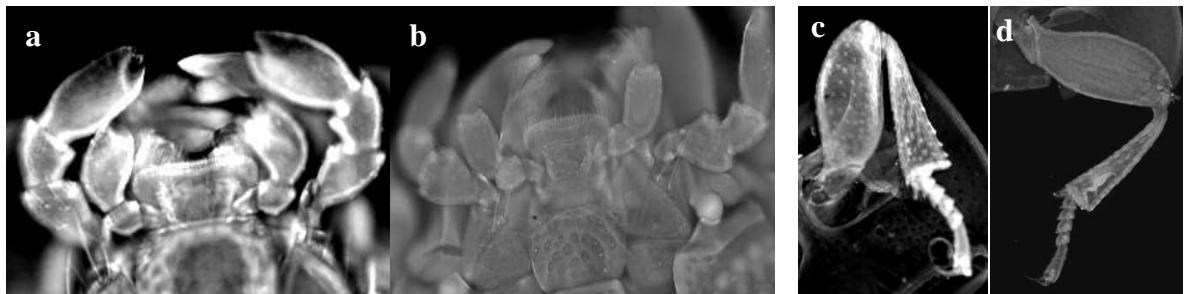

***TcasGr13***

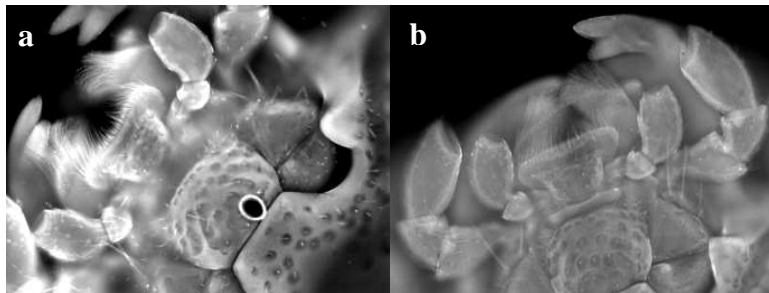

***TcasGr14***

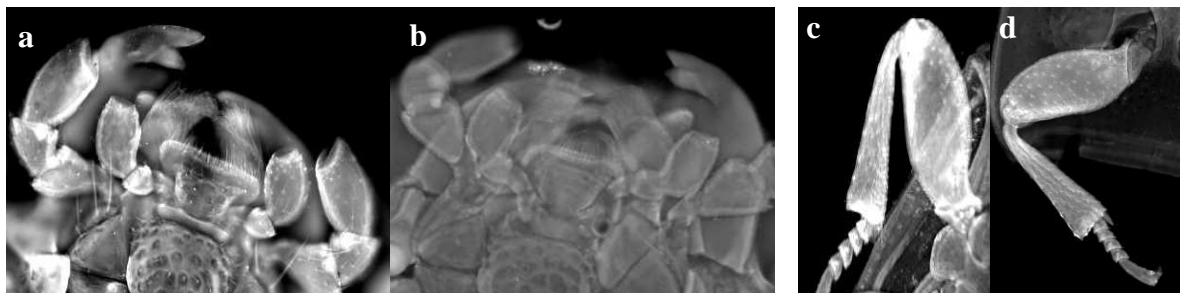

***TcasGr15***

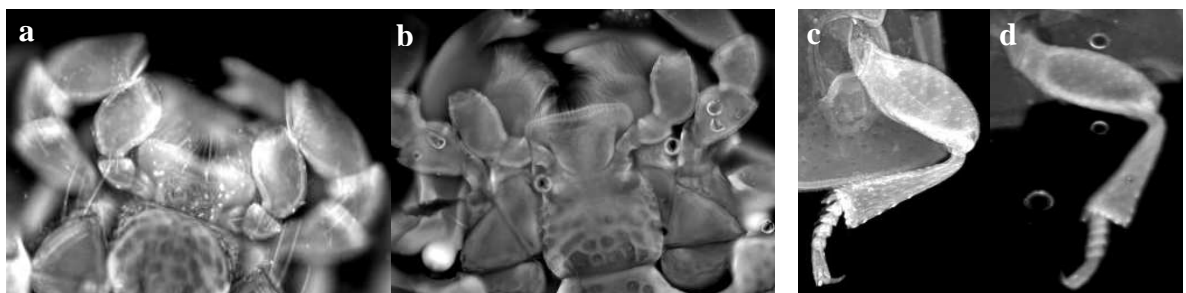

***TcasGr16***

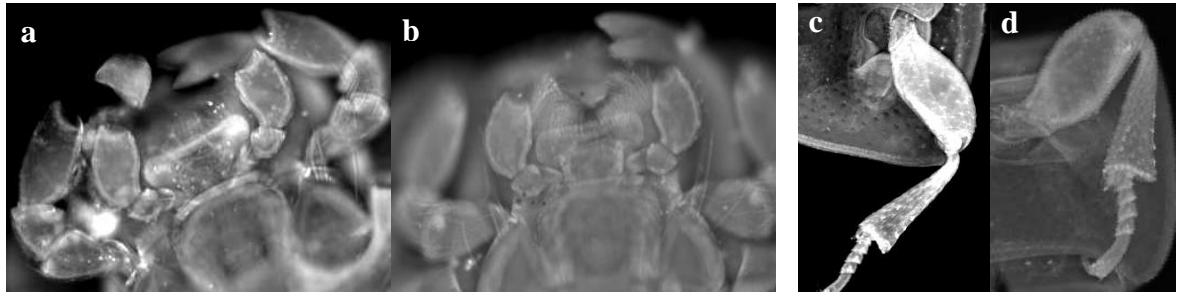

***TcasGr17***

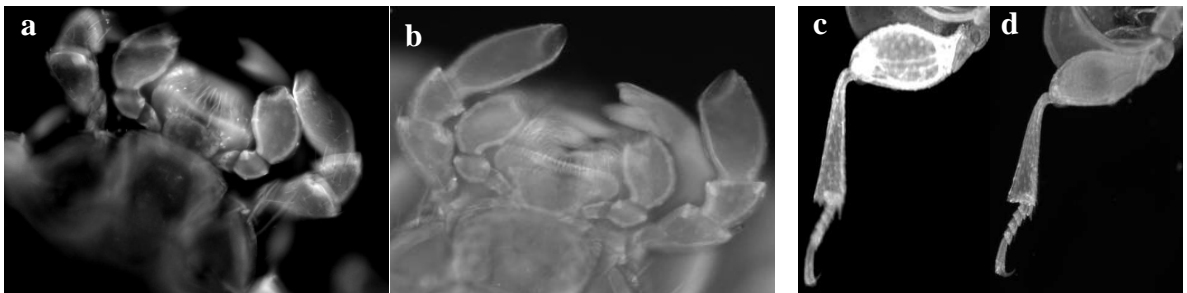

***TcasGr150***

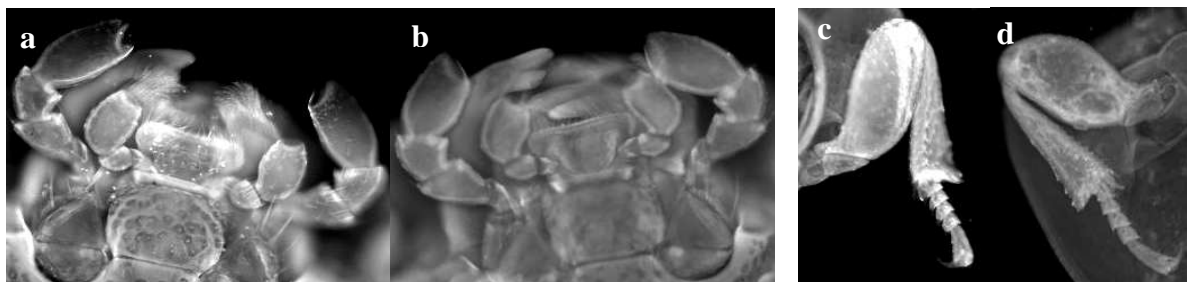

***TcasGr19***

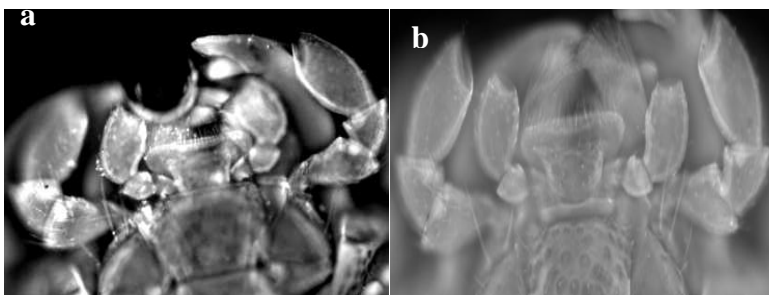

***TcasGr20***

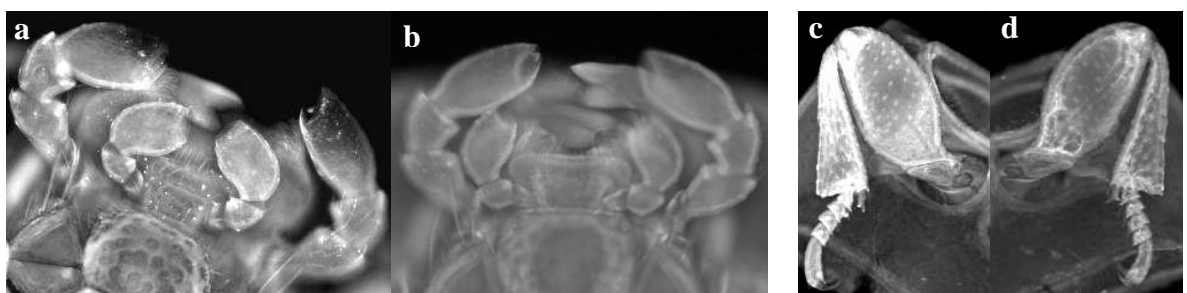

*TcasGr21*

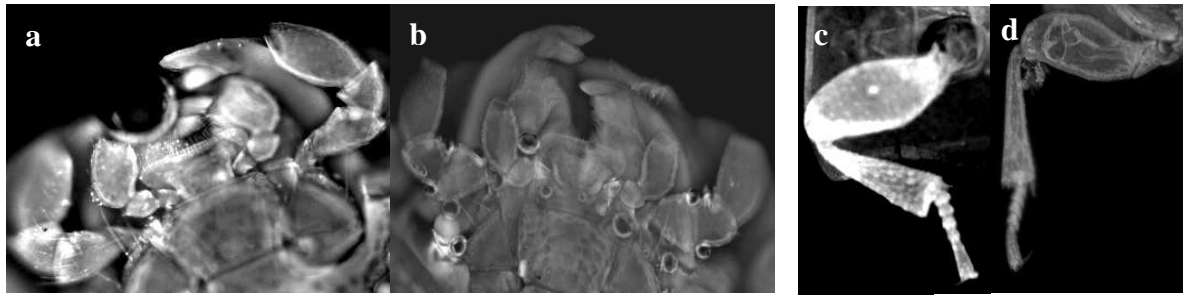

*TcasGr22*

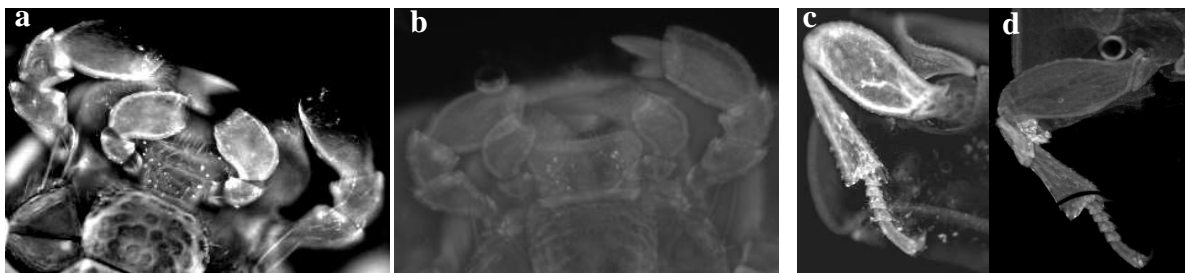

*TcasGr79*

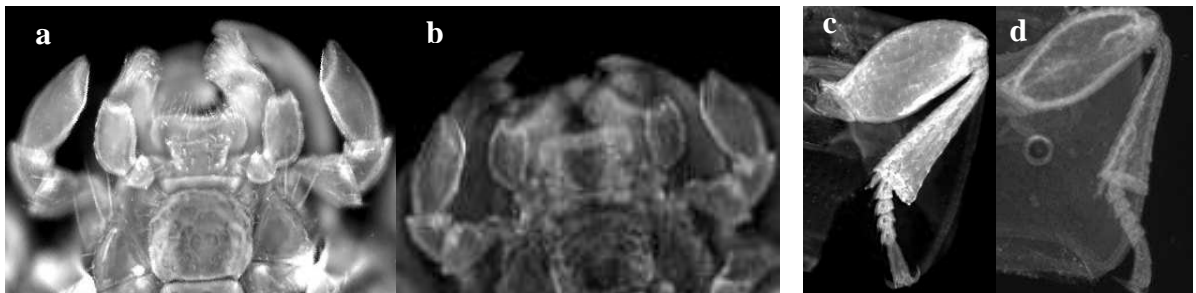

*TcasGr123*

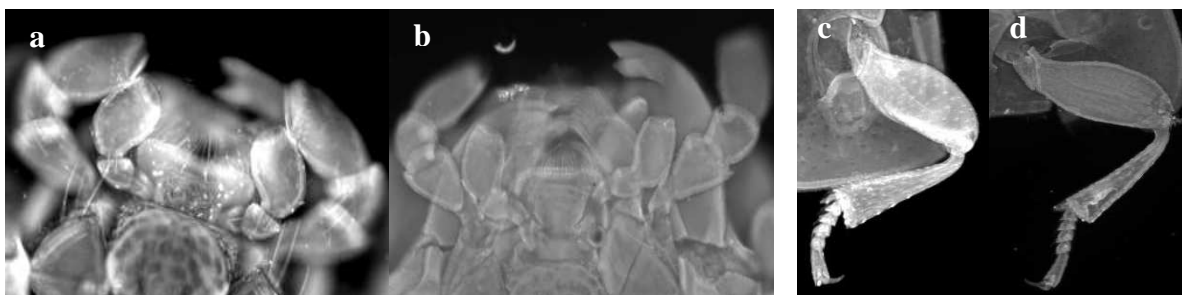

*TcasGr25*

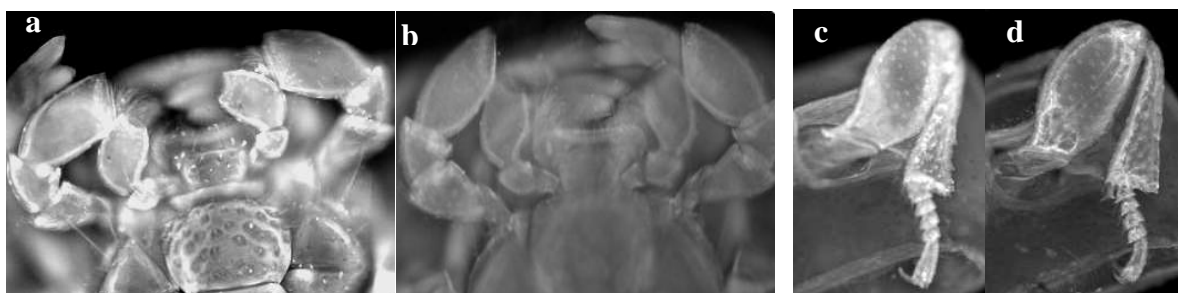

*TcasGr26*

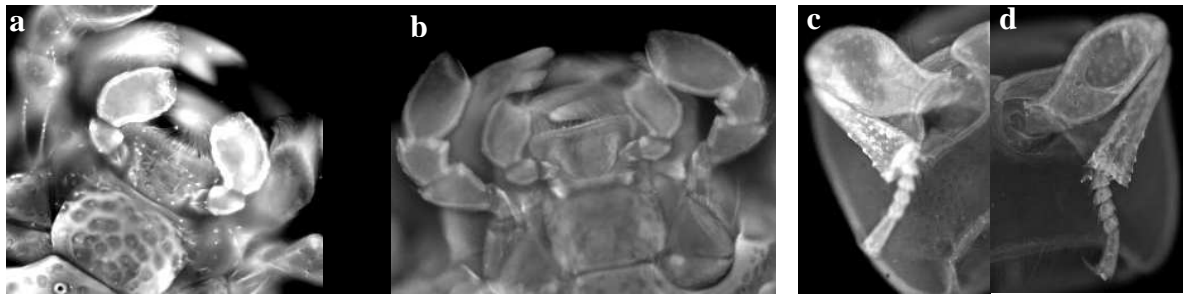

*TcasGr27*

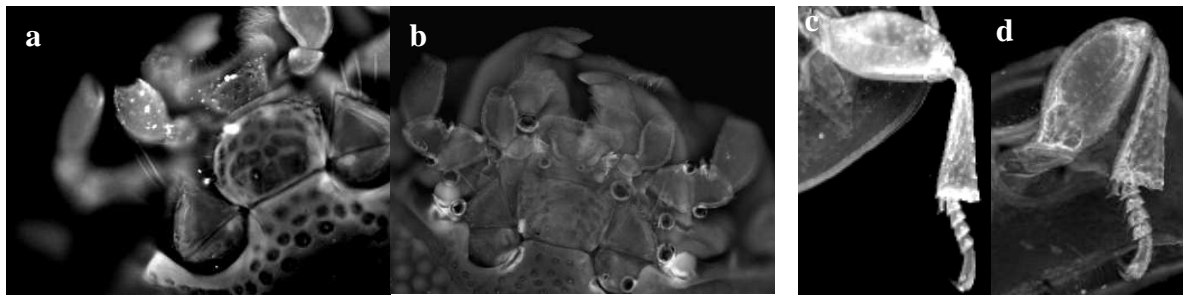

*TcasGr28*

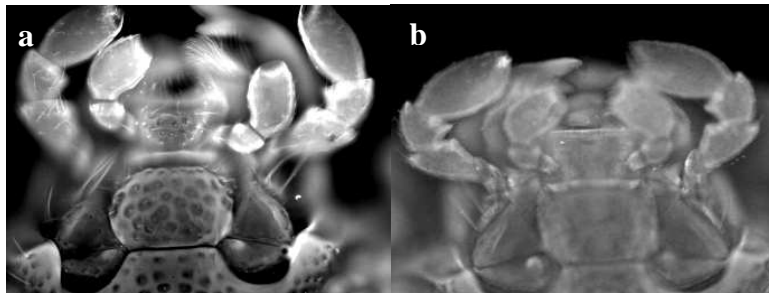

*TcasGr29*

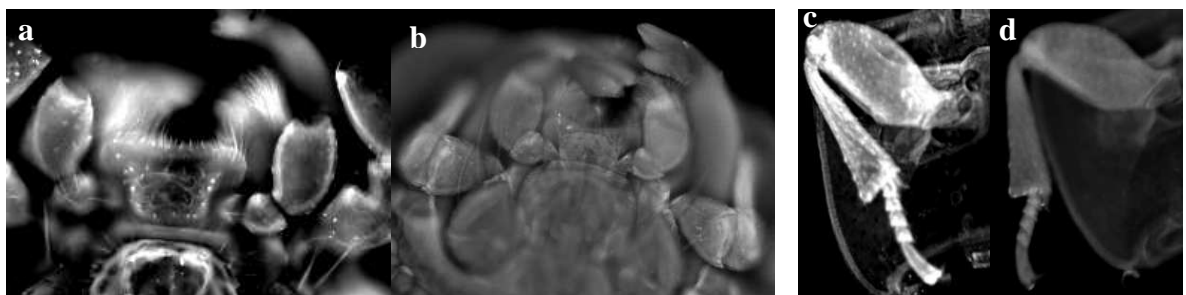

*TcasGr30*

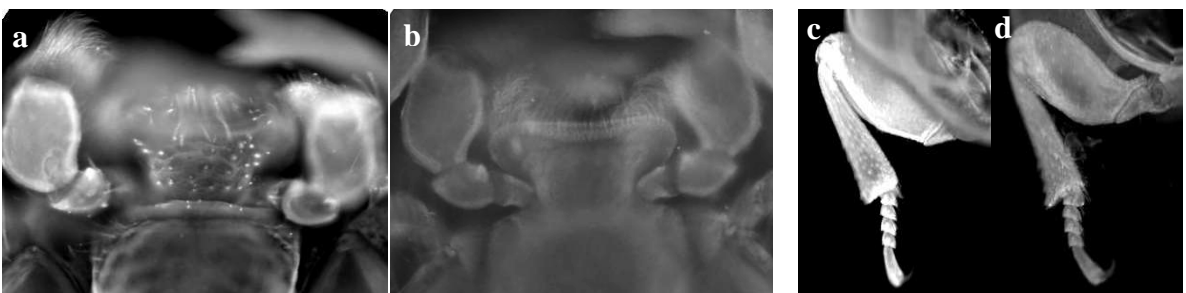

*TcasGr31*

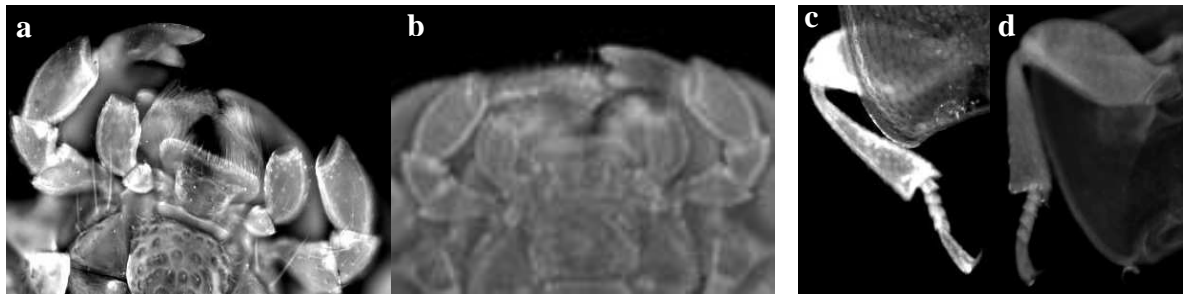

*TcasGr32*

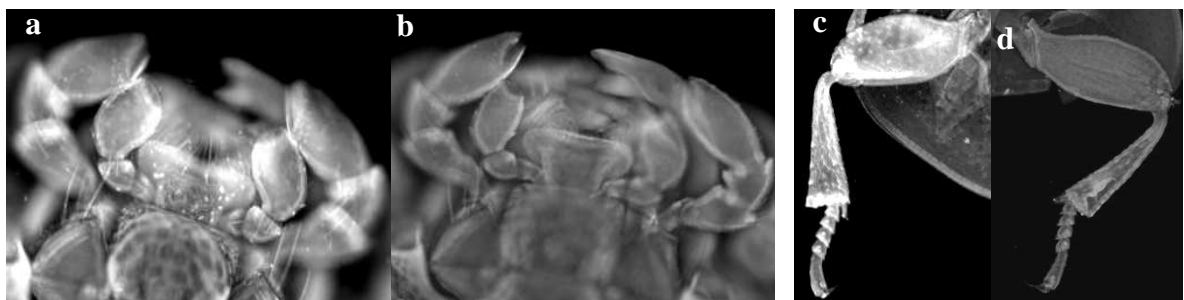

*TcasGr47*

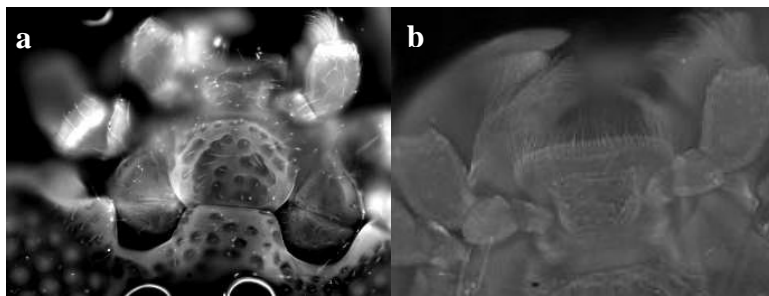

*TcasGr34*

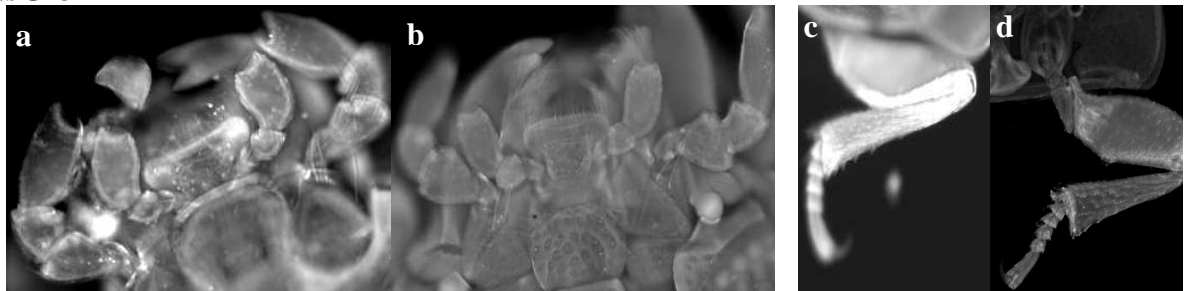

*TcasGr35*

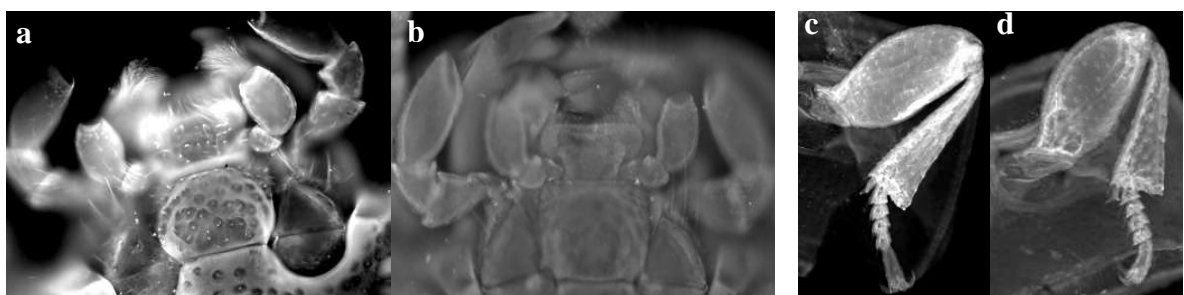

*TcasGr105*

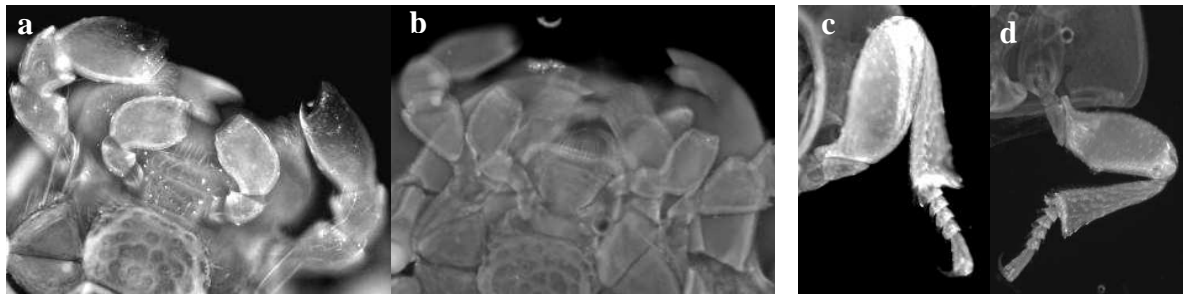

*TcasGr37*

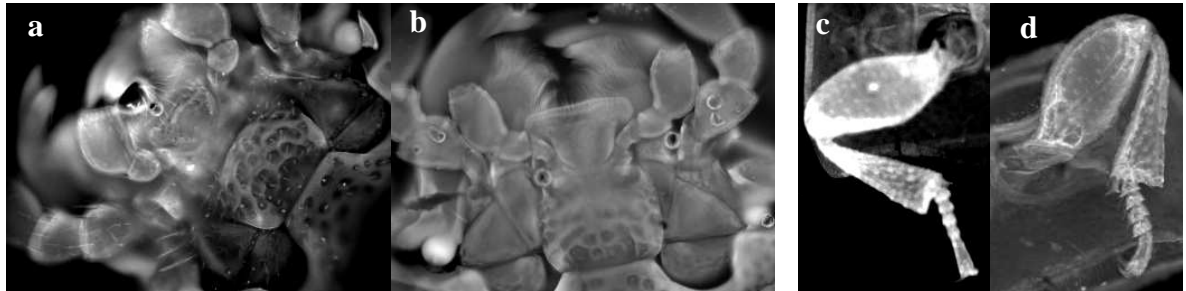

*TcasGr38*

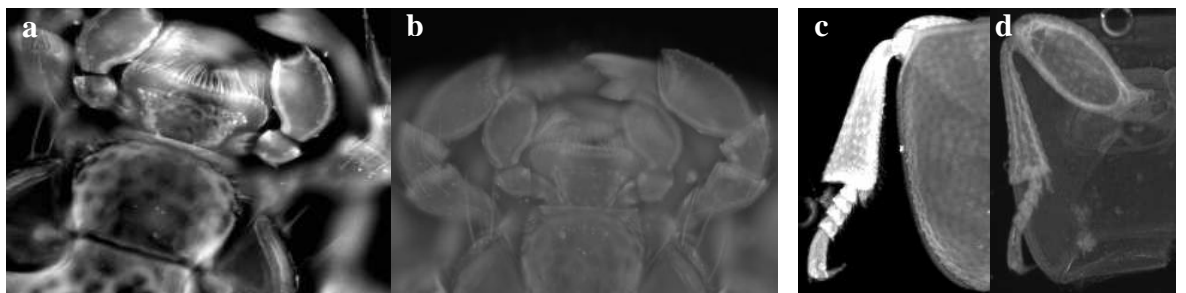

*TcasGr39*

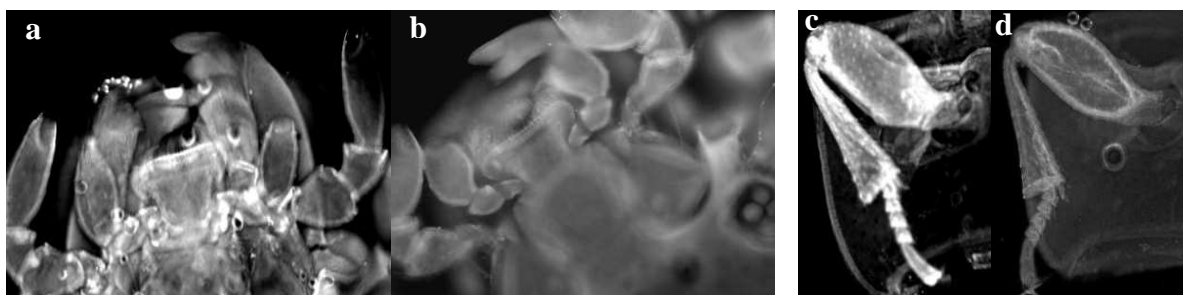

*TcasGr40*

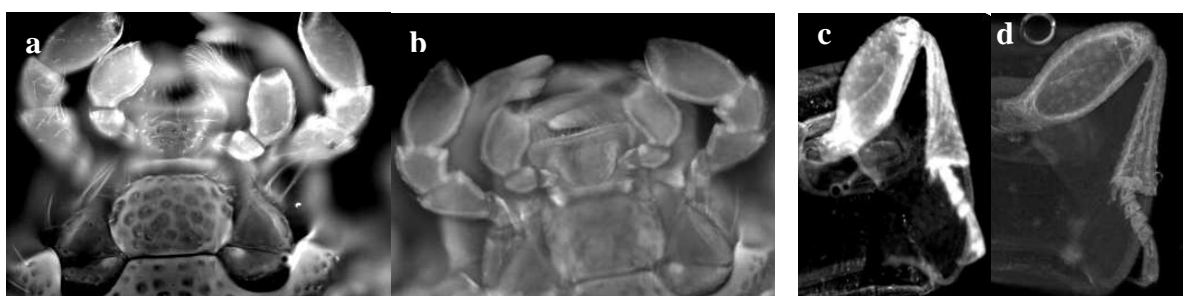

*TcasGr41*

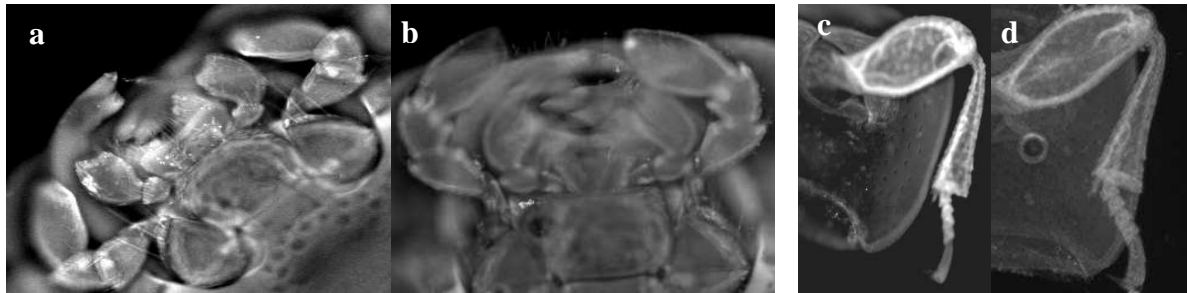

*TcasGr71*

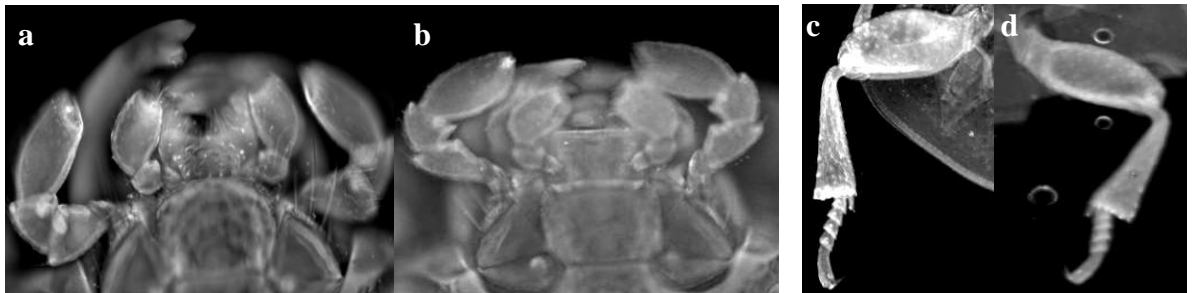

*TcasGr43*

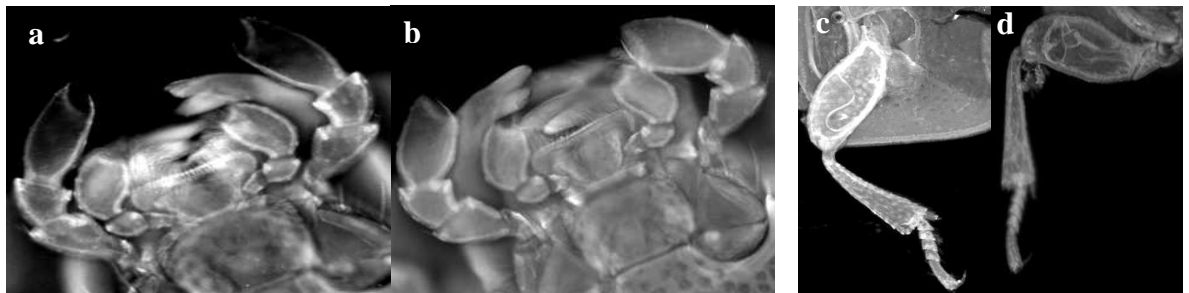

*TcasGr44*

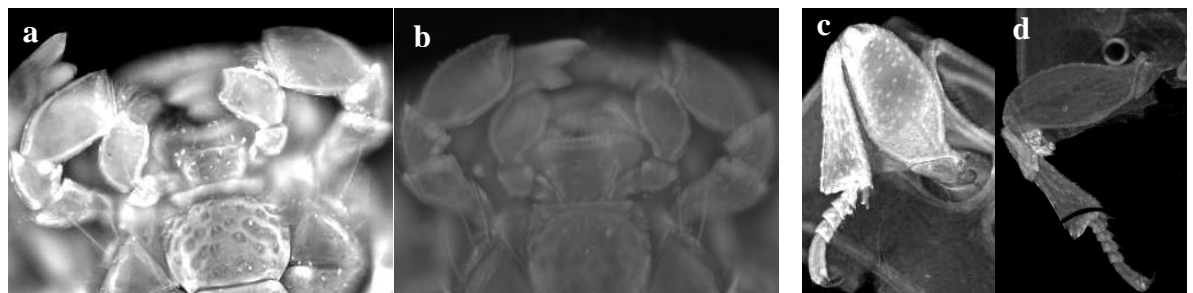

*TcasGr45*

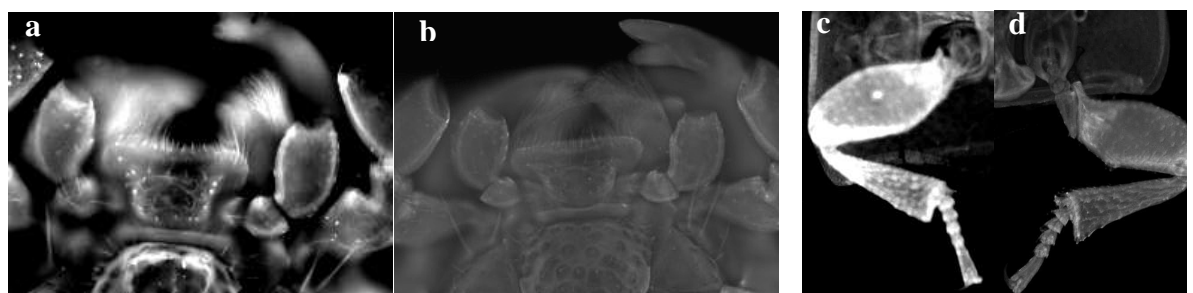

*TcasGr46*

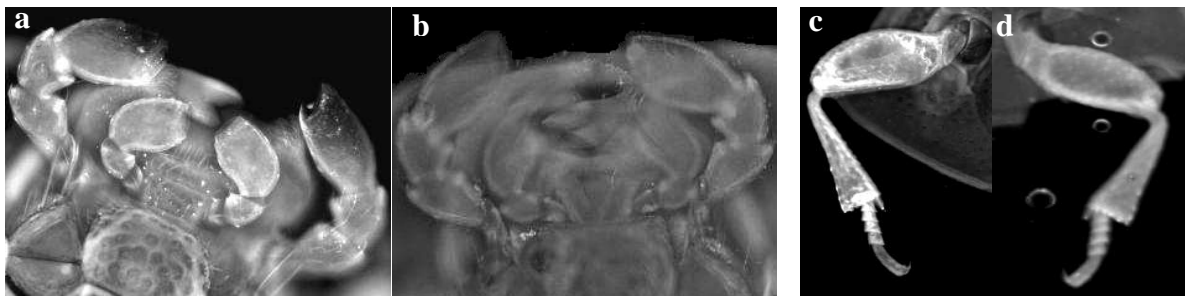

*TcasGr33*

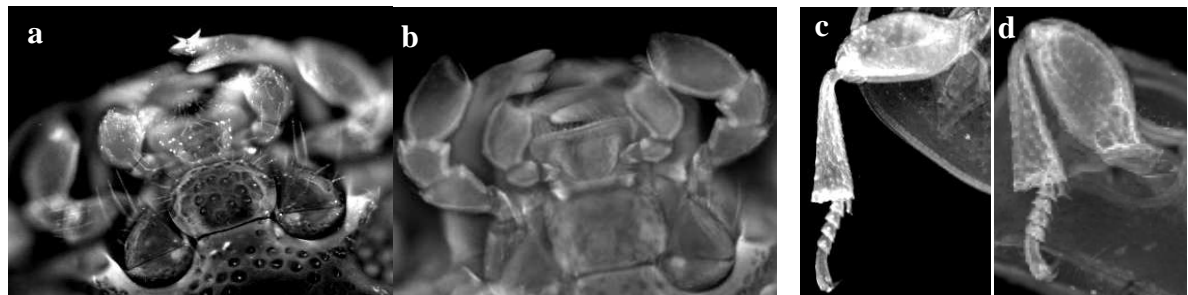

*TcasGr48*

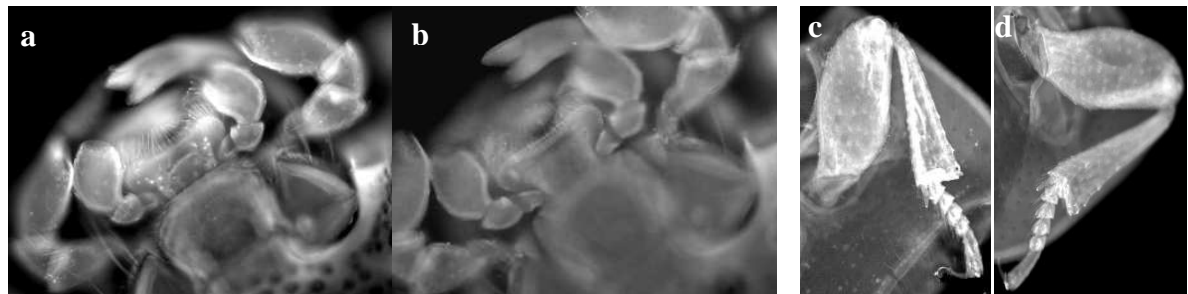

*TcasGr49*

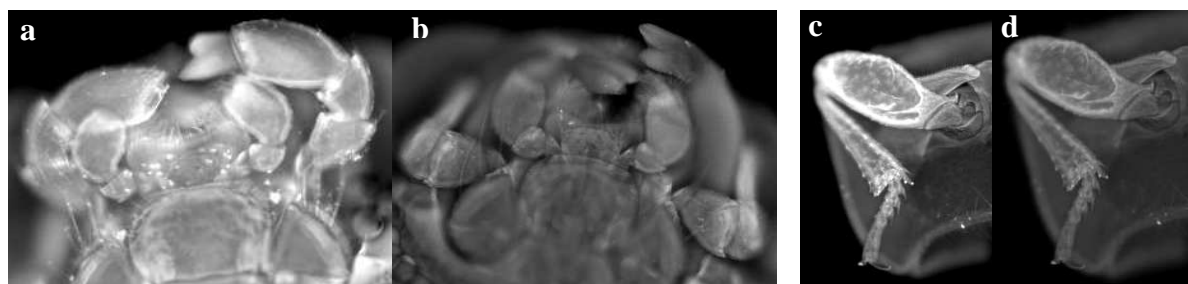

*TcasGr50*

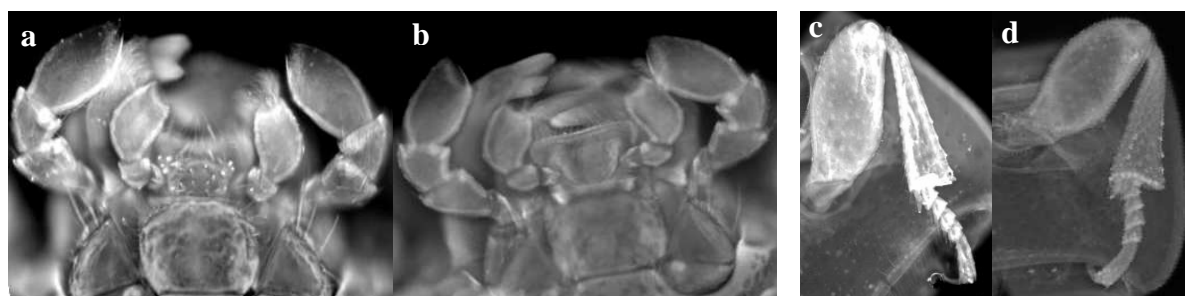



*TcasGr51*

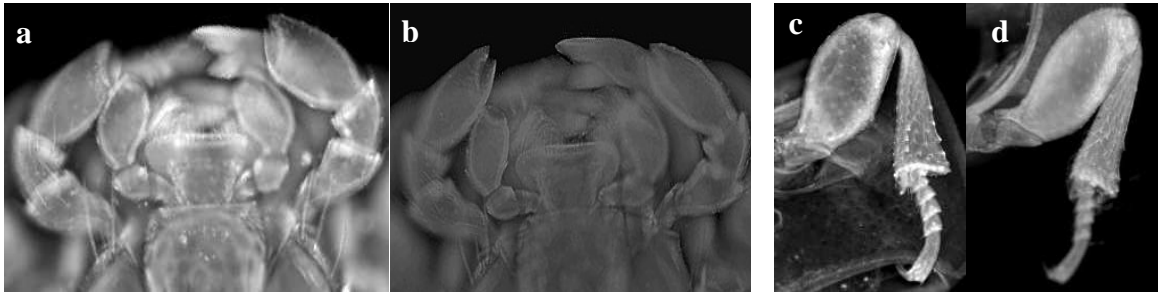

*TcasGr52*

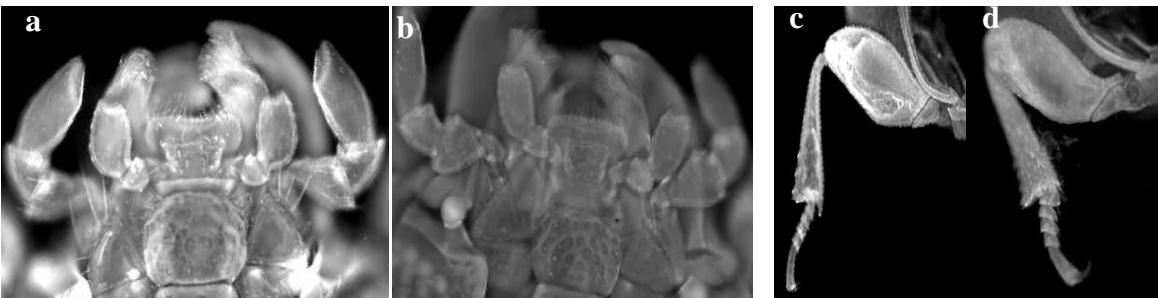

*TcasGr53*

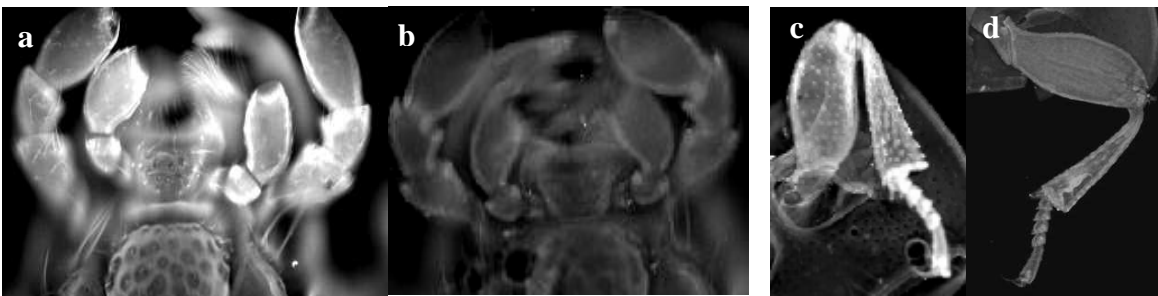

*TcasGr54*

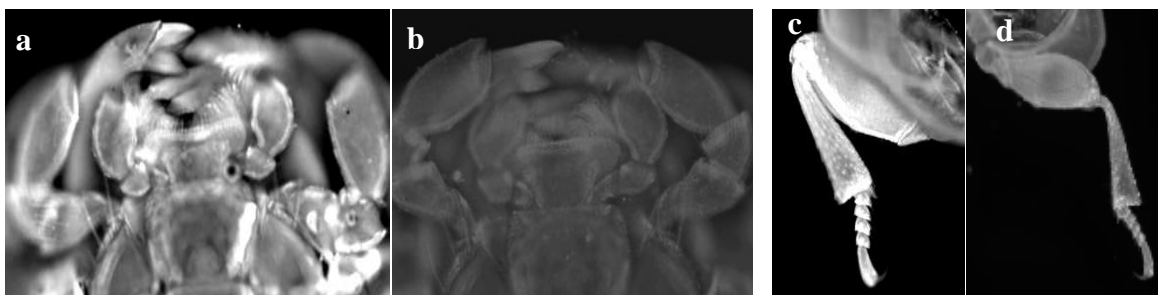

*TcasGr125*

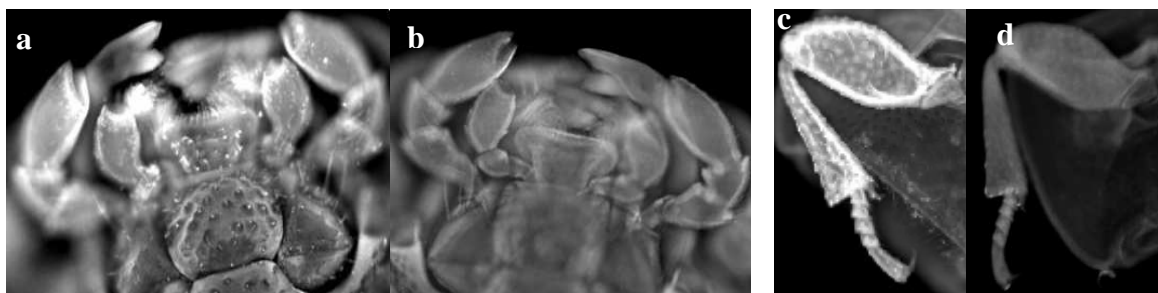

*TcasGr56*

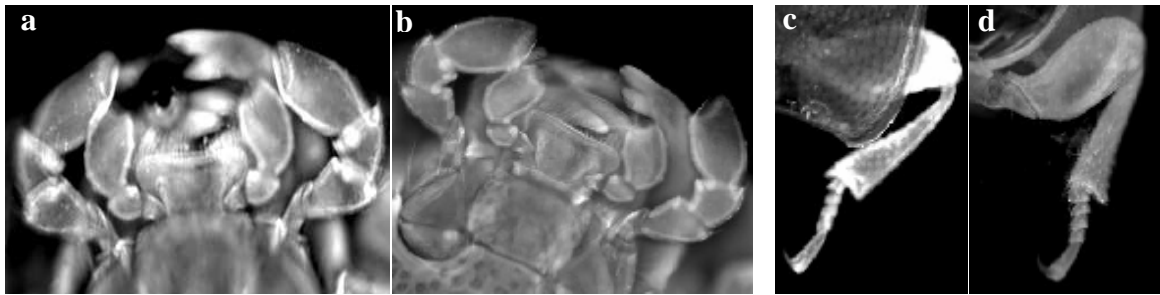

*TcasGr57*

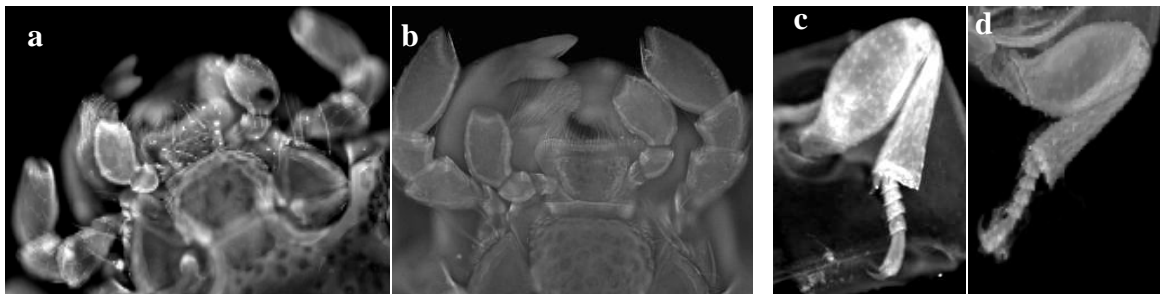

*TcasGr98*

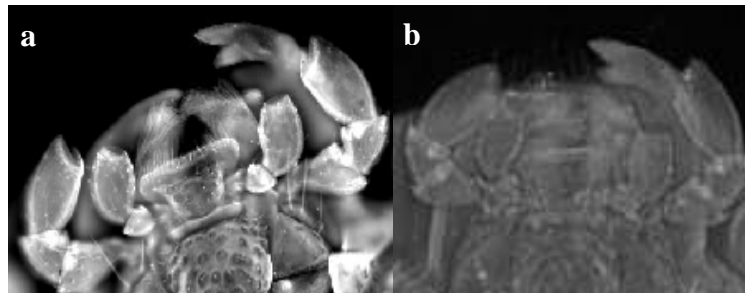

*TcasGr59*

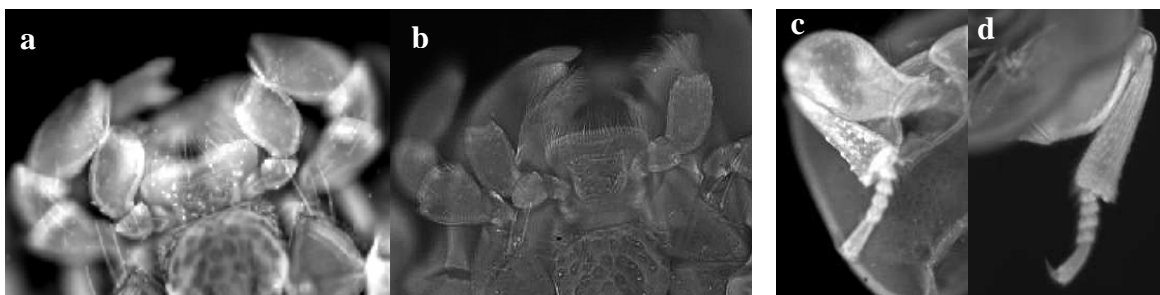

*TcasGr60*

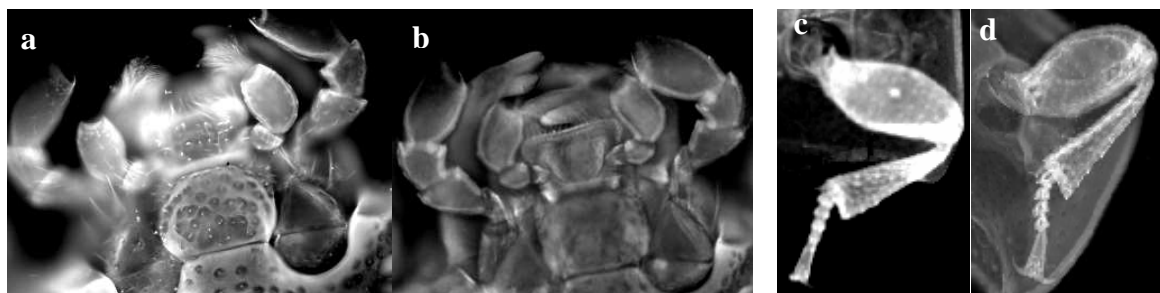

*TcasGr61*

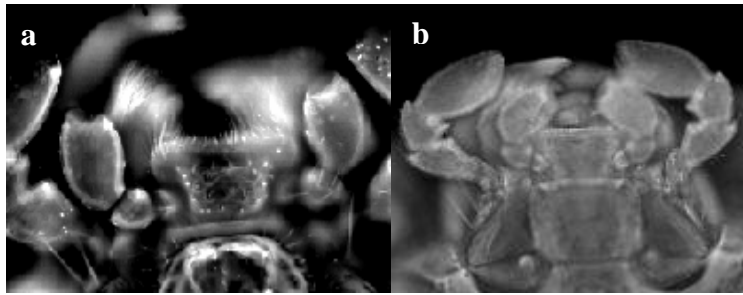

*TcasGr62*

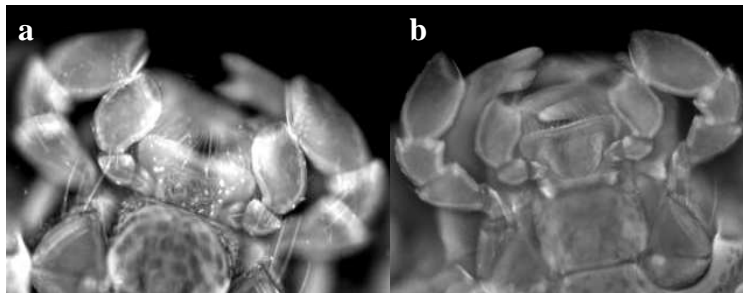

Figure S6.
